# Supplementary material for: Common, intermediate and well‐documented HLA alleles in world populations: CIWD version 3.0.0
Source: PubMed Central journal article supplement (PMC7317522; doi:10.1111/tan.13811), 2020-01-31
Supplement: TAN-95-516-s003.pdf [file TAN-95-516-s003.pdf]

Supplementary Table 3a. Comparison of HLA-A P group two-field assignments among CIWD catalogs <sup>a</sup>

| HLA-A IPD-<br>HLA/IMGT<br>3.31.0 | Nomenclature<br>Designation <sup>a</sup> | 3.0.0 CIWD                          |       |     |     |      |      |     |     |     | 2.0.0 CWD                           |          | EFI CWD  | China CWD |
|----------------------------------|------------------------------------------|-------------------------------------|-------|-----|-----|------|------|-----|-----|-----|-------------------------------------|----------|----------|-----------|
|                                  |                                          | Category by Population <sup>b</sup> |       |     |     |      |      |     |     |     | HLA-A<br>IPD-<br>IMGT/HL<br>A 3.9.0 | Category | Category | Category  |
|                                  |                                          | Highest<br>Frequency                | Total | AFA | API | EURO | MENA | HIS | NAM | UNK |                                     |          |          |           |
| A*01:01                          | P                                        | C                                   | C     | C   | C   | C    | C    | C   | C   | C   | A*01:01                             | C        | C        | C         |
| A*01:02                          | P                                        | C                                   | C     | C   | I   | C    | C    | C   | C   | C   | A*01:02                             | C        | C        |           |
| A*01:03                          | P                                        | C                                   | C     | C   | C   | C    | C    | C   | WD  | C   | A*01:03                             | C        | C        | WD        |
| A*01:04N <sup>c</sup>            | N                                        | WD                                  | WD    |     |     | WD   |      |     |     |     | A*01:04N                            | WD       |          |           |
| A*01:06                          | P                                        | C                                   | I     |     |     | I    | C    | I   |     | I   | A*01:06                             | WD       | WD       |           |
| A*01:09                          | P                                        | C                                   | WD    | C   |     | WD   |      |     |     | WD  | A*01:09                             | WD       | WD       |           |
| A*01:12                          | P                                        | I                                   | WD    |     | I   |      |      |     |     |     | A*01:12                             | WD       |          |           |
| A*01:14                          | P                                        | WD                                  | WD    |     |     | WD   |      |     |     |     | A*01:14                             |          |          |           |
| A*01:15N                         | N                                        | WD                                  | WD    |     |     | WD   |      |     |     |     | A*01:15N                            |          |          |           |
| A*01:16N                         | N                                        | WD                                  | WD    |     |     | WD   |      |     |     | WD  | A*01:16N                            |          |          |           |
| A*01:17                          | P                                        | WD                                  | WD    |     |     | WD   |      |     |     | WD  | A*01:17                             | WD       | WD       |           |
| A*01:23                          | P                                        | WD                                  | WD    | WD  |     | WD   | WD   |     |     | WD  | A*01:23                             |          |          |           |
| A*01:24                          | P                                        | WD                                  | WD    |     |     |      |      | WD  |     |     | A*01:24                             |          |          |           |
| A*01:25                          | P                                        | I                                   | I     | WD  |     | I    |      |     |     | I   | A*01:25                             | WD       | WD       |           |
| A*01:26                          | P                                        | I                                   | WD    |     | I   | WD   |      |     |     |     | A*01:26                             |          | WD       |           |
| A*01:29                          | P                                        | WD                                  | WD    |     |     | WD   |      |     |     |     | A*01:29                             |          |          |           |
| A*01:30                          | P                                        | WD                                  | WD    |     |     |      |      |     |     |     | A*01:30                             |          |          |           |
| A*01:38                          | P                                        | WD                                  | WD    |     |     | WD   |      |     |     |     | A*01:38                             |          | WD       |           |
| A*01:39                          | P                                        | WD                                  | WD    |     |     | WD   |      |     |     |     | A*01:39                             |          | WD       |           |
| A*01:40                          | P                                        | WD                                  | WD    |     |     | WD   |      |     |     |     | A*01:40                             |          | WD       |           |
| A*01:41                          | P                                        | o <sup>d</sup>                      | o     |     |     |      |      |     |     |     | A*01:41                             |          | WD       |           |
| A*01:42                          | P                                        | WD                                  | WD    |     |     | WD   |      |     |     |     | A*01:42                             |          |          |           |
| A*01:43                          | P                                        | I                                   | WD    |     | I   |      |      |     |     |     | A*01:43                             |          |          |           |
| A*01:44                          | P                                        | WD                                  | WD    |     |     | WD   |      |     |     |     | A*01:44                             |          |          |           |
| A*01:46                          | P                                        | WD                                  | WD    |     |     |      |      |     |     | WD  | A*01:46                             |          |          |           |
| A*01:48                          | P                                        | WD                                  | WD    |     |     |      |      |     |     | WD  | A*01:48                             |          |          |           |
| A*01:51                          | P                                        | WD                                  | WD    |     |     | WD   |      |     |     |     | A*01:51                             |          |          |           |

Supplementary Table 3a. Comparison of HLA-A P group two-field assignments among CIWD catalogs <sup>a</sup>

| HLA-A IPD-<br>HLA/IMGT<br>3.31.0 | Nomenclature<br>Designation <sup>a</sup> | 3.0.0 CIWD                          |       |     |     |      |      |     |     |     | 2.0.0 CWD                           |          | EFI CWD  | China CWD |
|----------------------------------|------------------------------------------|-------------------------------------|-------|-----|-----|------|------|-----|-----|-----|-------------------------------------|----------|----------|-----------|
|                                  |                                          | Category by Population <sup>b</sup> |       |     |     |      |      |     |     |     | HLA-A<br>IPD-<br>IMGT/HL<br>A 3.9.0 | Category | Category | Category  |
|                                  |                                          | Highest<br>Frequency                | Total | AFA | API | EURO | MENA | HIS | NAM | UNK |                                     |          |          |           |
| A*01:57N                         | N                                        | WD                                  | WD    |     |     | WD   |      |     |     |     | A*01:57N                            |          |          |           |
| A*01:61                          | P                                        | WD                                  | WD    |     |     | WD   |      |     |     |     | A*01:61                             |          |          |           |
| A*01:67                          | P                                        | WD                                  | WD    |     |     |      |      |     |     | WD  | A*01:67                             |          |          |           |
| A*01:68                          | P                                        | WD                                  | WD    |     |     | WD   |      |     |     |     | A*01:68                             |          |          |           |
| A*01:69                          | P                                        | WD                                  | WD    |     |     | WD   |      | WD  |     |     | A*01:69                             |          |          |           |
| A*01:72                          | P                                        | WD                                  | WD    |     |     | WD   |      |     |     |     | A*01:72                             |          |          |           |
| A*01:74                          | P                                        | WD                                  | WD    |     | WD  |      |      |     |     |     | A*01:74                             |          |          |           |
| A*01:78                          | P                                        | o                                   | o     |     |     |      |      |     |     |     | A*01:78                             |          |          | WD        |
| A*01:82                          | P                                        | I                                   | WD    |     | I   |      |      |     |     |     | A*01:82                             |          |          |           |
| A*01:86                          | P                                        | WD                                  | WD    |     |     | WD   |      |     |     | WD  | A*01:86                             |          |          |           |
| A*01:92                          | P                                        | WD                                  | WD    |     |     | WD   |      |     |     |     | A*01:92                             |          |          |           |
| A*01:98                          | P                                        | WD                                  | WD    |     |     | WD   |      |     |     |     | A*01:98                             |          |          |           |
| A*01:100                         | P                                        | WD                                  | WD    |     |     | WD   |      |     |     |     | A*01:100                            |          |          |           |
| A*01:104                         | P                                        | WD                                  | WD    |     | WD  |      |      |     |     |     | A*01:104                            |          |          |           |
| A*01:113                         | P                                        | WD                                  | WD    |     |     | WD   |      |     |     |     | A*01:113                            |          |          |           |
| A*01:123N                        | N                                        | WD                                  | WD    |     |     | WD   |      |     |     |     | A*01:123N                           |          |          |           |
| A*01:126                         | P                                        | WD                                  | WD    |     |     |      |      |     |     |     | A*01:126                            |          |          |           |
| A*01:156                         | P                                        | WD                                  | WD    |     |     |      |      |     |     |     | A*01:156                            |          |          |           |
| A*01:190                         | P                                        | WD                                  | WD    |     |     | WD   |      |     |     |     | A*01:190                            |          |          |           |
| A*02:01                          | P                                        | C                                   | C     | C   | C   | C    | C    | C   | C   | C   | A*02:01                             | C        | C        | C         |
| A*02:02                          | P                                        | C                                   | C     | C   | C   | C    | C    | C   | C   | C   | A*02:02                             | C        | C        | WD        |
| A*02:03                          | P                                        | C                                   | C     | C   | C   | I    | C    | C   | C   | C   | A*02:03                             | C        | WD       | C         |
| A*02:04                          | P                                        | C                                   | C     | C   | WD  | I    | WD   | C   | C   | C   | A*02:04                             | C        | WD       |           |
| A*02:05                          | P                                        | C                                   | C     | C   | C   | C    | C    | C   | C   | C   | A*02:05                             | C        | C        | C         |
| A*02:06                          | P                                        | C                                   | C     | C   | C   | C    | C    | C   | C   | C   | A*02:06                             | C        | WD       | C         |
| A*02:07                          | P                                        | C                                   | C     | WD  | C   | C    | C    | C   | C   | C   | A*02:07                             | C        | WD       | C         |
| A*02:08                          | P                                        | C                                   | C     | WD  | C   | C    | C    | I   |     | I   | A*02:08                             | C        |          | WD        |

Supplementary Table 3a. Comparison of HLA-A P group two-field assignments among CIWD catalogs <sup>a</sup>

| HLA-A IPD-<br>HLA/IMGT<br>3.31.0 | Nomenclature<br>Designation <sup>a</sup> | 3.0.0 CIWD                          |       |     |     |      |      |     |     |     | 2.0.0 CWD                           |          | EFI CWD  | China CWD |
|----------------------------------|------------------------------------------|-------------------------------------|-------|-----|-----|------|------|-----|-----|-----|-------------------------------------|----------|----------|-----------|
|                                  |                                          | Category by Population <sup>b</sup> |       |     |     |      |      |     |     |     | HLA-A<br>IPD-<br>IMGT/HL<br>A 3.9.0 | Category | Category | Category  |
|                                  |                                          | Highest<br>Frequency                | Total | AFA | API | EURO | MENA | HIS | NAM | UNK |                                     |          |          |           |
| A*02:10                          | P                                        | C                                   | I     |     | C   | WD   |      |     |     | I   | A*02:10                             | C        |          | C         |
| A*02:11                          | P                                        | C                                   | C     | C   | C   | C    | C    | C   | C   | C   | A*02:11                             | C        | WD       | WD        |
| A*02:12                          | P                                        | I                                   | I     |     | I   | I    | WD   | I   |     | I   | A*02:12                             | WD       |          | WD        |
| A*02:13                          | P                                        | C                                   | I     | WD  | WD  | I    |      | C   | C   | C   | A*02:13                             | WD       |          |           |
| A*02:14                          | P                                        | C                                   | I     | C   |     | WD   | C    | I   |     | I   | A*02:14                             | C        |          |           |
| A*02:16                          | P                                        | C                                   | C     | WD  | C   | WD   | WD   |     |     | I   | A*02:16                             | WD       |          |           |
| A*02:17                          | P                                        | C                                   | C     | C   | I   | C    | C    | C   | C   | C   | A*02:17                             | C        | WD       | WD        |
| A*02:18                          | P                                        | WD                                  | WD    |     |     |      |      |     |     | WD  | A*02:18                             | WD       |          |           |
| A*02:19                          | P                                        | I                                   | I     |     |     | WD   |      | I   |     | I   | A*02:19                             | WD       |          |           |
| A*02:20                          | P                                        | C                                   | C     | WD  | C   | C    | C    | C   | C   | C   | A*02:20                             | C        | WD       | WD        |
| A*02:21                          | P                                        | WD                                  | WD    |     |     | WD   |      |     |     |     | A*02:21                             | WD       |          |           |
| A*02:22                          | P                                        | C                                   | C     | C   | I   | C    | C    | C   | C   | C   | A*02:22                             | C        |          |           |
| A*02:24                          | P                                        | I                                   | I     | WD  |     | I    |      | I   |     | I   | A*02:24                             | C        |          | WD        |
| A*02:25                          | P                                        | o                                   | o     |     |     |      |      |     |     |     | A*02:25                             | WD       |          |           |
| A*02:26                          | P                                        | WD                                  | WD    |     |     | WD   |      |     |     | WD  | A*02:26                             |          |          |           |
| A*02:27                          | P                                        | I                                   | I     |     | WD  | I    |      |     |     | WD  | A*02:27                             | WD       |          |           |
| A*02:28                          | P                                        | WD                                  | WD    |     | WD  |      |      |     |     |     | A*02:28                             |          |          | WD        |
| A*02:29                          | P                                        | I                                   | I     |     |     | I    |      | WD  |     | I   | A*02:29                             | WD       |          |           |
| A*02:30                          | P                                        | C                                   | C     | WD  | I   | C    | WD   | I   |     | C   | A*02:30                             | C        |          |           |
| A*02:31                          | P                                        | WD                                  | WD    |     |     | WD   |      |     |     |     | A*02:31                             |          |          |           |
| A*02:33                          | P                                        | C                                   | I     |     |     | WD   |      | C   | C   | I   | A*02:33                             | WD       |          |           |
| A*02:34                          | P                                        | WD                                  | WD    |     |     | WD   |      |     |     | WD  | A*02:34                             | WD       |          |           |
| A*02:35                          | P                                        | C                                   | C     | WD  | I   | C    | WD   |     |     | I   | A*02:35                             | WD       |          |           |
| A*02:36                          | P                                        | WD                                  | WD    |     |     | WD   |      |     |     | WD  | A*02:36                             | WD       |          | WD        |
| A*02:37                          | P                                        | WD                                  | WD    |     |     | WD   |      |     |     |     | A*02:37                             |          |          |           |
| A*02:38                          | P                                        | I                                   | I     |     |     | I    |      |     |     | WD  | A*02:38                             | WD       |          |           |
| A*02:39                          | P                                        | I                                   | WD    |     |     |      |      | I   |     | WD  | A*02:39                             | WD       |          |           |

Supplementary Table 3a. Comparison of HLA-A P group two-field assignments among CIWD catalogs <sup>a</sup>

| HLA-A IPD-<br>HLA/IMGT<br>3.31.0 | Nomenclature<br>Designation <sup>a</sup> | 3.0.0 CIWD                          |       |     |     |      |      |     |     |     | 2.0.0 CWD                           |          | EFI CWD  | China CWD |
|----------------------------------|------------------------------------------|-------------------------------------|-------|-----|-----|------|------|-----|-----|-----|-------------------------------------|----------|----------|-----------|
|                                  |                                          | Category by Population <sup>b</sup> |       |     |     |      |      |     |     |     | HLA-A<br>IPD-<br>IMGT/HL<br>A 3.9.0 | Category | Category | Category  |
|                                  |                                          | Highest<br>Frequency                | Total | AFA | API | EURO | MENA | HIS | NAM | UNK |                                     |          |          |           |
| A*02:40                          | P                                        | WD                                  | WD    |     |     | WD   |      |     |     |     | A*02:40                             |          |          |           |
| A*02:42                          | P                                        | WD                                  | WD    |     | WD  |      |      |     |     |     | A*02:42                             |          |          | WD        |
| A*02:44                          | P                                        | I                                   | WD    |     |     | WD   |      | I   |     | I   | A*02:44                             | WD       |          |           |
| A*02:45                          | P                                        | I                                   | WD    |     |     | WD   |      | I   |     |     | A*02:45                             | WD       |          |           |
| A*02:46                          | P                                        | WD                                  | WD    |     |     | WD   |      |     |     |     | A*02:46                             |          |          |           |
| A*02:47                          | P                                        | WD                                  | WD    |     |     |      |      |     |     |     | A*02:47                             |          |          |           |
| A*02:48                          | P                                        | WD                                  | WD    |     | WD  |      |      |     |     |     | A*02:48                             |          |          | WD        |
| A*02:49                          | P                                        | WD                                  | WD    |     |     | WD   | WD   |     |     | WD  | A*02:49                             | WD       |          |           |
| A*02:51                          | P                                        | WD                                  | WD    |     |     |      |      |     |     |     | A*02:51                             |          |          |           |
| A*02:52                          | P                                        | I                                   | WD    |     |     | WD   |      | I   |     | I   | A*02:52                             |          |          |           |
| A*02:53N                         | N                                        | I                                   | WD    |     | I   |      |      |     |     | WD  | A*02:53N                            | C        |          | WD        |
| A*02:56                          | P                                        | I                                   | WD    |     |     | I    |      |     |     |     | A*02:56                             |          |          |           |
| A*02:57                          | P                                        | WD                                  | WD    |     |     |      |      | WD  |     |     | A*02:57                             |          |          |           |
| A*02:58                          | P                                        | I                                   | WD    |     |     |      |      | I   |     |     | A*02:58                             | WD       |          |           |
| A*02:59                          | P                                        | WD                                  | WD    |     |     | WD   |      |     |     |     | A*02:59                             |          |          |           |
| A*02:60                          | P                                        | C                                   | I     | C   |     | WD   |      | I   |     | I   | A*02:60                             | C        |          |           |
| A*02:63                          | P                                        | WD                                  | WD    | WD  |     |      |      |     |     |     | A*02:63                             | WD       |          |           |
| A*02:64                          | P                                        | C                                   | I     |     | I   | WD   | WD   | I   | C   | I   | A*02:64                             | WD       | WD       |           |
| A*02:67                          | P                                        | WD                                  | WD    |     |     | WD   |      |     |     |     | A*02:67                             |          | WD       |           |
| A*02:74                          | P                                        | WD                                  | WD    |     |     | WD   |      |     |     |     | A*02:74                             | WD       | WD       |           |
| A*02:76                          | P                                        | WD                                  | WD    |     |     | WD   |      |     |     |     | A*02:76                             |          | WD       |           |
| A*02:77                          | P                                        | WD                                  | WD    |     |     | WD   |      |     |     |     | A*02:77                             |          |          |           |
| A*02:79                          | P                                        | o                                   | o     |     |     |      |      |     |     |     | A*02:79                             |          |          | WD        |
| A*02:80                          | P                                        | o                                   | o     |     |     |      |      |     |     |     | A*02:80                             |          |          | WD        |
| A*02:81                          | P                                        | WD                                  | WD    |     |     | WD   |      |     |     |     | A*02:81                             |          |          |           |
| A*02:83N                         | N                                        | WD                                  | WD    |     |     | WD   |      |     |     |     | A*02:83N                            |          |          |           |
| A*02:84                          | P                                        | WD                                  | WD    | WD  |     |      |      |     | WD  | WD  | A*02:84                             | WD       |          |           |

Supplementary Table 3a. Comparison of HLA-A P group two-field assignments among CIWD catalogs <sup>a</sup>

| HLA-A IPD-<br>HLA/IMGT<br>3.31.0 | Nomenclature<br>Designation <sup>a</sup> | 3.0.0 CIWD                          |       |     |     |      |      |     |     |     | 2.0.0 CWD                           |          | EFI CWD  | China CWD |
|----------------------------------|------------------------------------------|-------------------------------------|-------|-----|-----|------|------|-----|-----|-----|-------------------------------------|----------|----------|-----------|
|                                  |                                          | Category by Population <sup>b</sup> |       |     |     |      |      |     |     |     | HLA-A<br>IPD-<br>IMGT/HL<br>A 3.9.0 | Category | Category | Category  |
|                                  |                                          | Highest<br>Frequency                | Total | AFA | API | EURO | MENA | HIS | NAM | UNK |                                     |          |          |           |
| A*02:85                          | P                                        | C                                   | I     | WD  |     | WD   | C    |     |     | I   | A*02:85                             | WD       | WD       |           |
| A*02:86                          | P                                        | WD                                  | WD    | WD  |     | WD   |      |     |     | WD  | A*02:86                             | WD       |          |           |
| A*02:87                          | P                                        | I                                   | WD    |     |     | WD   |      | I   |     | WD  | A*02:87                             | WD       | WD       |           |
| A*02:90                          | P                                        | WD                                  | WD    |     |     | WD   |      |     |     |     | A*02:90                             |          | WD       | WD        |
| A*02:93                          | P                                        | C                                   | WD    |     |     | WD   | C    |     |     | WD  | A*02:93                             | WD       | WD       | WD        |
| A*02:94N                         | N                                        | WD                                  | WD    |     |     | WD   |      |     |     |     | A*02:94N                            |          |          |           |
| A*02:95                          | P                                        | WD                                  | WD    |     |     | WD   |      |     |     |     | A*02:95                             |          | WD       |           |
| A*02:96                          | P                                        | I                                   | WD    |     |     | WD   |      | WD  |     | I   | A*02:96                             | WD       | WD       |           |
| A*02:99                          | P                                        | o                                   | o     |     |     |      |      |     |     |     | A*02:99                             |          |          | WD        |
| A*02:101                         | P                                        | WD                                  | WD    |     |     | WD   |      |     |     |     | A*02:101                            |          |          |           |
| A*02:102                         | P                                        | I                                   | WD    |     |     |      | WD   |     |     | I   | A*02:102                            |          |          |           |
| A*02:105                         | P                                        | WD                                  | WD    |     |     | WD   |      |     |     |     | A*02:105                            |          |          |           |
| A*02:107                         | P                                        | WD                                  | WD    |     |     | WD   |      |     |     | WD  | A*02:107                            |          | WD       |           |
| A*02:108                         | P                                        | o                                   | o     |     |     |      |      |     |     |     | A*02:108                            |          |          | WD        |
| A*02:109                         | P                                        | WD                                  | WD    |     |     | WD   |      |     |     |     | A*02:109                            |          |          |           |
| A*02:110                         | P                                        | WD                                  | WD    |     |     | WD   | WD   |     |     |     | A*02:110                            |          |          |           |
| A*02:113N                        | N                                        | WD                                  | WD    |     |     |      |      |     |     |     | A*02:113N                           |          |          |           |
| A*02:114                         | P                                        | WD                                  | WD    |     |     |      |      |     |     |     | A*02:114                            |          |          |           |
| A*02:118                         | P                                        | WD                                  | WD    |     |     | WD   |      |     |     |     | A*02:118                            |          |          |           |
| A*02:119                         | P                                        | WD                                  | WD    |     |     | WD   |      |     |     |     | A*02:119                            | WD       |          |           |
| A*02:120                         | P                                        | WD                                  | WD    |     |     | WD   |      |     |     |     | A*02:120                            |          |          |           |
| A*02:121                         | P                                        | WD                                  | WD    |     |     | WD   |      |     |     |     | A*02:121                            |          | WD       | WD        |
| A*02:122                         | P                                        | WD                                  | WD    | WD  |     |      |      |     |     |     | A*02:122                            | WD       |          |           |
| A*02:123                         | P                                        | WD                                  | WD    |     |     | WD   |      |     |     | WD  | A*02:123                            | WD       |          |           |
| A*02:125N                        | N                                        | WD                                  | WD    |     |     | WD   |      |     |     |     | A*02:125N                           |          |          |           |
| A*02:128                         | P                                        | WD                                  | WD    |     | WD  |      |      |     |     |     | A*02:128                            |          |          |           |
| A*02:133                         | P                                        | WD                                  | WD    |     |     | WD   |      |     |     |     | A*02:133                            |          | WD       |           |

Supplementary Table 3a. Comparison of HLA-A P group two-field assignments among CIWD catalogs <sup>a</sup>

| HLA-A IPD-<br>HLA/IMGT<br>3.31.0 | Nomenclature<br>Designation <sup>a</sup> | 3.0.0 CIWD                          |       |     |     |      |      |     |     |     | 2.0.0 CWD                           |          | EFI CWD  | China CWD |
|----------------------------------|------------------------------------------|-------------------------------------|-------|-----|-----|------|------|-----|-----|-----|-------------------------------------|----------|----------|-----------|
|                                  |                                          | Category by Population <sup>b</sup> |       |     |     |      |      |     |     |     | HLA-A<br>IPD-<br>IMGT/HL<br>A 3.9.0 | Category | Category | Category  |
|                                  |                                          | Highest<br>Frequency                | Total | AFA | API | EURO | MENA | HIS | NAM | UNK |                                     |          |          |           |
| A*02:135                         | P                                        | WD                                  | WD    |     |     | WD   |      |     |     |     | A*02:135                            |          | WD       |           |
| A*02:136                         | P                                        | I                                   | WD    |     |     |      |      | I   |     | WD  | A*02:136                            |          |          |           |
| A*02:137                         | P                                        | I                                   | WD    |     |     |      |      | I   |     |     | A*02:137                            | WD       |          |           |
| A*02:138                         | P                                        | WD                                  | WD    |     |     | WD   |      |     |     |     | A*02:138                            |          | WD       |           |
| A*02:139                         | P                                        | WD                                  | WD    |     |     | WD   |      |     |     |     | A*02:139                            |          | WD       |           |
| A*02:141                         | P                                        | WD                                  | WD    |     |     | WD   | WD   |     |     |     | A*02:141                            |          | WD       |           |
| A*02:147                         | P                                        | I                                   | WD    |     |     |      |      | I   |     |     | A*02:147                            |          |          |           |
| A*02:149                         | P                                        | WD                                  | WD    |     |     | WD   |      |     |     |     | A*02:149                            |          |          |           |
| A*02:151                         | P                                        | I                                   | WD    |     |     | I    |      |     |     | WD  | A*02:151                            |          | WD       |           |
| A*02:154                         | P                                        | WD                                  | WD    |     |     |      | WD   |     |     |     | A*02:154                            |          |          |           |
| A*02:156                         | P                                        | WD                                  | WD    |     |     | WD   |      |     |     |     | A*02:156                            |          | WD       |           |
| A*02:157                         | P                                        | WD                                  | WD    |     |     | WD   |      |     |     |     | A*02:157                            |          |          |           |
| A*02:158                         | P                                        | WD                                  | WD    |     |     | WD   |      |     |     |     | A*02:158                            |          | WD       |           |
| A*02:160                         | P                                        | WD                                  | WD    |     |     | WD   |      |     |     |     | A*02:160                            |          | WD       |           |
| A*02:161                         | P                                        | WD                                  | WD    |     |     |      | WD   |     |     |     | A*02:161                            |          |          |           |
| A*02:162                         | P                                        | WD                                  | WD    |     |     | WD   |      |     |     |     | A*02:162                            |          |          |           |
| A*02:163                         | P                                        | WD                                  | WD    |     |     | WD   |      |     |     |     | A*02:163                            |          | WD       |           |
| A*02:164                         | P                                        | WD                                  | WD    |     |     | WD   |      |     |     |     | A*02:164                            |          | WD       |           |
| A*02:165                         | P                                        | WD                                  | WD    |     |     | WD   |      |     |     |     | A*02:165                            |          | WD       |           |
| A*02:166                         | P                                        | WD                                  | WD    |     |     | WD   |      |     |     |     | A*02:166                            |          | WD       |           |
| A*02:172                         | P                                        | WD                                  | WD    |     |     | WD   |      |     |     |     | A*02:172                            |          | WD       |           |
| A*02:173                         | P                                        | WD                                  | WD    |     |     | WD   |      |     |     |     | A*02:173                            |          | WD       |           |
| A*02:174                         | P                                        | WD                                  | WD    |     |     |      |      |     |     |     | A*02:174                            |          | WD       |           |
| A*02:177                         | P                                        | WD                                  | WD    | WD  |     |      |      |     |     |     | A*02:177                            |          |          |           |
| A*02:180                         | P                                        | WD                                  | WD    |     |     | WD   |      |     |     |     | A*02:180                            |          | WD       |           |
| A*02:182                         | P                                        | WD                                  | WD    |     |     | WD   |      |     |     |     | A*02:182                            |          | WD       |           |
| A*02:183                         | P                                        | WD                                  | WD    |     |     | WD   |      |     |     | WD  | A*02:183                            |          |          |           |

Supplementary Table 3a. Comparison of HLA-A P group two-field assignments among CIWD catalogs <sup>a</sup>

| HLA-A IPD-<br>HLA/IMGT<br>3.31.0 | Nomenclature<br>Designation <sup>a</sup> | 3.0.0 CIWD                          |       |     |     |      |      |     |     |     | 2.0.0 CWD                           |          | EFI CWD  | China CWD |
|----------------------------------|------------------------------------------|-------------------------------------|-------|-----|-----|------|------|-----|-----|-----|-------------------------------------|----------|----------|-----------|
|                                  |                                          | Category by Population <sup>b</sup> |       |     |     |      |      |     |     |     | HLA-A<br>IPD-<br>IMGT/HL<br>A 3.9.0 | Category | Category | Category  |
|                                  |                                          | Highest<br>Frequency                | Total | AFA | API | EURO | MENA | HIS | NAM | UNK |                                     |          |          |           |
| A*02:186                         | P                                        | WD                                  | WD    | WD  |     |      |      |     |     |     | A*02:186                            |          |          |           |
| A*02:188                         | P                                        | WD                                  | WD    |     |     | WD   |      |     |     |     | A*02:188                            |          |          |           |
| A*02:189                         | P                                        | WD                                  | WD    |     |     | WD   |      |     |     |     | A*02:189                            |          | WD       | WD        |
| A*02:190                         | P                                        | WD                                  | WD    |     |     | WD   |      |     |     |     | A*02:190                            |          |          |           |
| A*02:194                         | P                                        | WD                                  | WD    |     |     | WD   |      |     |     |     | A*02:194                            |          |          |           |
| A*02:195                         | P                                        | WD                                  | WD    |     |     | WD   |      |     |     |     | A*02:195                            |          |          |           |
| A*02:197                         | P                                        | WD                                  | WD    |     |     | WD   |      |     |     |     | A*02:197                            |          |          |           |
| A*02:198                         | P                                        | WD                                  | WD    |     |     | WD   |      |     |     |     | A*02:198                            |          | WD       |           |
| A*02:199                         | P                                        | WD                                  | WD    |     |     | WD   |      |     |     |     | A*02:199                            |          | WD       |           |
| A*02:203                         | P                                        | WD                                  | WD    |     |     | WD   |      |     |     |     | A*02:203                            |          |          |           |
| A*02:205                         | P                                        | WD                                  | WD    |     |     | WD   |      |     |     |     | A*02:205                            |          | WD       |           |
| A*02:206                         | P                                        | WD                                  | WD    |     |     | WD   |      |     |     |     | A*02:206                            |          |          |           |
| A*02:209                         | P                                        | WD                                  | WD    |     |     |      |      |     |     |     | A*02:209                            |          |          |           |
| A*02:210                         | P                                        | WD                                  | WD    |     |     | WD   |      |     |     |     | A*02:210                            |          | WD       |           |
| A*02:211                         | P                                        | I                                   | WD    |     |     | WD   |      | I   |     |     | A*02:211                            |          | WD       |           |
| A*02:212                         | P                                        | WD                                  | WD    |     |     | WD   |      |     |     |     | A*02:212                            |          |          |           |
| A*02:213                         | P                                        | o                                   | o     |     |     |      |      |     |     |     | A*02:213                            |          | WD       |           |
| A*02:217                         | P                                        | WD                                  | WD    |     |     | WD   |      |     |     |     | A*02:217                            |          | WD       |           |
| A*02:218                         | P                                        | WD                                  | WD    |     |     | WD   |      |     |     |     | A*02:218                            |          |          |           |
| A*02:220                         | P                                        | o                                   | o     |     |     |      |      |     |     |     | A*02:220                            |          | WD       |           |
| A*02:221                         | P                                        | WD                                  | WD    |     |     | WD   |      |     |     |     | A*02:221                            |          | WD       |           |
| A*02:227N                        | N                                        | WD                                  | WD    |     |     | WD   |      |     |     |     | A*02:227N                           |          |          |           |
| A*02:230                         | P                                        | o                                   | o     |     |     |      |      |     |     |     | A*02:230                            |          |          | WD        |
| A*02:235                         | P                                        | WD                                  | WD    |     |     | WD   |      |     |     |     | A*02:235                            |          | WD       |           |
| A*02:236                         | P                                        | WD                                  | WD    |     |     | WD   |      |     |     |     | A*02:236                            |          |          |           |
| A*02:237                         | P                                        | WD                                  | WD    |     |     | WD   |      |     |     |     | A*02:237                            |          |          |           |
| A*02:245                         | P                                        | WD                                  | WD    |     |     | WD   |      |     |     |     | A*02:245                            |          | WD       |           |

Supplementary Table 3a. Comparison of HLA-A P group two-field assignments among CIWD catalogs <sup>a</sup>

| HLA-A IPD-<br>HLA/IMGT<br>3.31.0 | Nomenclature<br>Designation <sup>a</sup> | 3.0.0 CIWD                          |       |     |     |      |      |     |     |     | 2.0.0 CWD                           |           | EFI CWD  | China CWD |    |
|----------------------------------|------------------------------------------|-------------------------------------|-------|-----|-----|------|------|-----|-----|-----|-------------------------------------|-----------|----------|-----------|----|
|                                  |                                          | Category by Population <sup>b</sup> |       |     |     |      |      |     |     |     | HLA-A<br>IPD-<br>IMGT/HL<br>A 3.9.0 | Category  | Category | Category  |    |
|                                  |                                          | Highest<br>Frequency                | Total | AFA | API | EURO | MENA | HIS | NAM | UNK |                                     |           |          |           |    |
| A*02:246                         | P                                        | WD                                  | WD    |     |     | WD   |      |     |     |     | WD                                  | A*02:246  |          |           |    |
| A*02:249                         | P                                        | o                                   | o     |     |     |      |      |     |     |     |                                     | A*02:249  |          |           | WD |
| A*02:251                         | P                                        | o                                   | o     |     |     |      |      |     |     |     |                                     | A*02:251  |          |           | WD |
| A*02:259                         | P                                        | o                                   | o     |     |     |      |      |     |     |     |                                     | A*02:259  |          |           | WD |
| A*02:263                         | P                                        | WD                                  | WD    |     |     |      |      |     |     |     |                                     | A*02:263  |          |           |    |
| A*02:269                         | P                                        | o                                   | o     |     |     |      |      |     |     |     |                                     | A*02:269  |          |           | WD |
| A*02:273                         | P                                        | WD                                  | WD    |     |     | WD   |      |     |     |     |                                     | A*02:273  |          |           |    |
| A*02:277                         | P                                        | WD                                  | WD    |     |     | WD   |      |     |     |     |                                     | A*02:277  |          |           |    |
| A*02:278                         | P                                        | WD                                  | WD    |     |     |      |      | WD  |     |     |                                     | A*02:278  |          |           |    |
| A*02:283                         | P                                        | WD                                  | WD    |     |     | WD   |      |     |     |     |                                     | A*02:283  |          | WD        |    |
| A*02:289                         | P                                        | WD                                  | WD    |     | WD  | WD   |      |     |     |     |                                     | A*02:289  |          | WD        |    |
| A*02:293Q                        | Q                                        | o                                   | o     |     |     |      |      |     |     |     |                                     | A*02:293Q |          |           | WD |
| A*02:299                         | P                                        | WD                                  | WD    |     |     | WD   |      |     |     |     |                                     | A*02:299  |          |           |    |
| A*02:306                         | P                                        | WD                                  | WD    |     |     | WD   |      |     |     |     |                                     | A*02:306  |          |           |    |
| A*02:312                         | P                                        | WD                                  | WD    |     |     |      |      |     |     |     |                                     | A*02:312  |          |           |    |
| A*02:325                         | P                                        | WD                                  | WD    |     |     | WD   |      |     |     |     |                                     | A*02:325  |          |           |    |
| A*02:326                         | P                                        | WD                                  | WD    |     |     | WD   |      |     |     |     |                                     | A*02:326  |          |           |    |
| A*02:332                         | P                                        | WD                                  | WD    |     |     | WD   |      |     |     |     |                                     | A*02:332  |          |           |    |
| A*02:338                         | P                                        | WD                                  | WD    |     |     | WD   |      |     |     |     |                                     | A*02:338  |          |           |    |
| A*02:342                         | P                                        | WD                                  | WD    |     |     | WD   |      |     |     |     |                                     | A*02:342  |          |           |    |
| A*02:343                         | P                                        | WD                                  | WD    |     |     | WD   |      |     |     |     |                                     | A*02:343  |          |           |    |
| A*02:344                         | P                                        | o                                   | o     |     |     |      |      |     |     |     |                                     | A*02:344  |          |           | WD |
| A*02:346                         | P                                        | WD                                  | WD    |     |     | WD   |      |     |     |     |                                     | A*02:346  |          |           |    |
| A*02:359                         | P                                        | WD                                  | WD    |     |     |      |      |     |     |     |                                     | A*02:359  |          |           |    |
| A*02:367                         | P                                        | WD                                  | WD    |     |     | WD   |      |     |     |     |                                     | A*02:367  |          |           |    |
| A*02:380                         | P                                        | WD                                  | WD    |     |     | WD   |      |     |     |     |                                     | A*02:380  |          |           |    |
| A*02:382                         | P                                        | WD                                  | WD    |     |     |      | WD   |     |     |     |                                     | A*02:382  |          |           |    |



Supplementary Table 3a. Comparison of HLA-A P group two-field assignments among CIWD catalogs <sup>a</sup>

| HLA-A IPD-<br>HLA/IMGT<br>3.31.0 | Nomenclature<br>Designation <sup>a</sup> | 3.0.0 CIWD                          |       |     |     |      |      |     |     |     | 2.0.0 CWD                           |          | EFI CWD  | China CWD |
|----------------------------------|------------------------------------------|-------------------------------------|-------|-----|-----|------|------|-----|-----|-----|-------------------------------------|----------|----------|-----------|
|                                  |                                          | Category by Population <sup>b</sup> |       |     |     |      |      |     |     |     | HLA-A<br>IPD-<br>IMGT/HL<br>A 3.9.0 | Category | Category | Category  |
|                                  |                                          | Highest<br>Frequency                | Total | AFA | API | EURO | MENA | HIS | NAM | UNK |                                     |          |          |           |
| A*02:392                         | P                                        | WD                                  | WD    |     |     |      |      |     |     |     | A*02:392                            |          |          |           |
| A*02:393                         | P                                        | WD                                  | WD    |     |     | WD   |      |     |     |     | A*02:393                            |          | WD       |           |
| A*02:419                         | P                                        | o                                   | o     |     |     |      |      |     |     |     | A*02:419                            |          |          | WD        |
| A*02:423                         | P                                        | WD                                  | WD    |     | WD  |      |      |     |     |     | A*02:423                            |          |          |           |
| A*02:433                         | P                                        | WD                                  | WD    |     |     |      | WD   |     |     |     | A*02:433                            |          |          |           |
| A*02:434                         | P                                        | WD                                  | WD    |     |     |      | WD   |     |     |     | A*02:434                            |          |          |           |
| A*02:436                         | P                                        | I                                   | WD    |     | I   |      |      |     |     |     | A*02:436                            |          |          |           |
| A*02:478                         | P                                        | o                                   | o     |     |     |      |      |     |     |     | A*02:478                            |          |          | WD        |
| A*02:484                         | P                                        | WD                                  | WD    |     |     | WD   |      |     |     |     | A*02:484                            |          |          |           |
| A*02:498                         | P                                        | WD                                  | WD    |     |     | WD   |      |     |     |     | A*02:498                            |          |          |           |
| A*02:514N                        | N                                        | WD                                  | WD    |     | WD  |      |      |     |     |     | A*02:514N                           |          |          |           |
| A*02:562                         | P                                        | WD                                  | WD    |     |     |      | WD   |     |     |     | A*02:562                            |          |          |           |
| A*02:580                         | P                                        | WD                                  | WD    |     | WD  |      |      |     |     |     | A*02:580                            |          |          |           |
| A*02:623                         | P                                        | I                                   | WD    |     |     |      |      |     |     | I   | A*02:623                            |          |          |           |
| A*03:01                          | P                                        | C                                   | C     | C   | C   | C    | C    | C   | C   | C   | A*03:01                             | C        | C        | C         |
| A*03:02                          | P                                        | C                                   | C     | C   | C   | C    | C    | C   | C   | C   | A*03:02                             | C        | C        | C         |
| A*03:04                          | P                                        | I                                   | WD    |     |     | WD   |      | I   |     |     | A*03:04                             |          | WD       |           |
| A*03:05                          | P                                        | I                                   | I     |     |     | I    |      | I   |     | I   | A*03:05                             | C        | WD       | WD        |
| A*03:06                          | P                                        | WD                                  | WD    |     |     | WD   |      |     |     |     | A*03:06                             | WD       |          |           |
| A*03:07                          | P                                        | I                                   | WD    | WD  |     | WD   |      | I   |     | WD  | A*03:07                             | WD       | WD       |           |
| A*03:08                          | P                                        | I                                   | WD    | WD  |     | WD   |      |     |     | I   | A*03:08                             | WD       | WD       |           |
| A*03:09                          | P                                        | WD                                  | WD    |     |     |      |      |     |     |     | A*03:09                             | WD       |          |           |
| A*03:10                          | P                                        | WD                                  | WD    |     | WD  |      |      |     |     |     | A*03:10                             |          |          |           |
| A*03:12                          | P                                        | WD                                  | WD    |     |     | WD   |      |     |     |     | A*03:12                             |          |          | WD        |
| A*03:13                          | P                                        | WD                                  | WD    |     |     | WD   |      |     |     |     | A*03:13                             |          |          |           |
| A*03:14                          | P                                        | WD                                  | WD    |     |     | WD   |      |     |     |     | A*03:14                             |          | WD       |           |
| A*03:15                          | P                                        | WD                                  | WD    |     |     | WD   |      |     |     |     | A*03:15                             |          | WD       |           |

Supplementary Table 3a. Comparison of HLA-A P group two-field assignments among CIWD catalogs <sup>a</sup>

| HLA-A IPD-<br>HLA/IMGT<br>3.31.0 | Nomenclature<br>Designation <sup>a</sup> | 3.0.0 CIWD                          |       |     |     |      |      |     |     |     | 2.0.0 CWD                           |          | EFI CWD  | China CWD |
|----------------------------------|------------------------------------------|-------------------------------------|-------|-----|-----|------|------|-----|-----|-----|-------------------------------------|----------|----------|-----------|
|                                  |                                          | Category by Population <sup>b</sup> |       |     |     |      |      |     |     |     | HLA-A<br>IPD-<br>IMGT/HL<br>A 3.9.0 | Category | Category | Category  |
|                                  |                                          | Highest<br>Frequency                | Total | AFA | API | EURO | MENA | HIS | NAM | UNK |                                     |          |          |           |
| A*03:16                          | P                                        | WD                                  | WD    |     |     | WD   |      |     |     |     | A*03:16                             |          |          |           |
| A*03:17                          | P                                        | WD                                  | WD    |     |     | WD   |      |     |     |     | A*03:17                             | WD       |          |           |
| A*03:18                          | P                                        | WD                                  | WD    |     |     |      | WD   |     |     |     | A*03:18                             |          |          |           |
| A*03:21N                         | N                                        | WD                                  | WD    |     |     | WD   |      |     |     |     | A*03:21N                            | WD       |          |           |
| A*03:22                          | P                                        | WD                                  | WD    |     |     | WD   |      |     |     |     | A*03:22                             | WD       | WD       |           |
| A*03:23                          | P                                        | WD                                  | WD    |     |     | WD   |      |     |     |     | A*03:23                             |          |          |           |
| A*03:25                          | P                                        | WD                                  | WD    |     |     | WD   |      |     |     |     | A*03:25                             |          | WD       |           |
| A*03:27                          | P                                        | WD                                  | WD    |     |     | WD   |      |     |     |     | A*03:27                             |          | WD       |           |
| A*03:28                          | P                                        | WD                                  | WD    |     |     | WD   |      |     |     |     | A*03:28                             |          | WD       |           |
| A*03:29                          | P                                        | WD                                  | WD    |     |     | WD   |      |     |     | WD  | A*03:29                             |          | WD       |           |
| A*03:33                          | P                                        | I                                   | I     |     |     | I    |      |     |     | I   | A*03:33                             |          | WD       |           |
| A*03:38                          | P                                        | WD                                  | WD    |     |     | WD   |      |     |     |     | A*03:38                             |          | WD       |           |
| A*03:46                          | P                                        | WD                                  | WD    |     |     | WD   |      |     |     |     | A*03:46                             |          |          |           |
| A*03:47                          | P                                        | WD                                  | WD    |     |     | WD   |      |     |     |     | A*03:47                             |          | WD       |           |
| A*03:48                          | P                                        | WD                                  | WD    |     |     | WD   |      |     |     |     | A*03:48                             |          | WD       |           |
| A*03:49                          | P                                        | WD                                  | WD    |     |     | WD   |      |     |     |     | A*03:49                             |          | WD       |           |
| A*03:50                          | P                                        | WD                                  | WD    |     |     | WD   |      |     |     |     | A*03:50                             | WD       | WD       |           |
| A*03:51                          | P                                        | WD                                  | WD    | WD  |     |      |      |     |     |     | A*03:51                             |          |          |           |
| A*03:53                          | P                                        | WD                                  | WD    |     |     | WD   |      |     |     |     | A*03:53                             |          | WD       |           |
| A*03:56                          | P                                        | WD                                  | WD    |     |     | WD   |      |     |     |     | A*03:56                             |          | WD       |           |
| A*03:57                          | P                                        | WD                                  | WD    |     |     |      |      |     |     |     | A*03:57                             |          |          |           |
| A*03:62                          | P                                        | WD                                  | WD    |     |     | WD   |      |     |     | WD  | A*03:62                             |          |          |           |
| A*03:63                          | P                                        | WD                                  | WD    |     |     | WD   |      |     |     |     | A*03:63                             |          | WD       |           |
| A*03:65                          | P                                        | WD                                  | WD    |     |     | WD   |      |     |     |     | A*03:65                             |          | WD       |           |
| A*03:74                          | P                                        | WD                                  | WD    |     |     | WD   |      |     |     |     | A*03:74                             |          | WD       |           |
| A*03:77                          | P                                        | o                                   | o     |     |     |      |      |     |     |     | A*03:77                             |          |          | WD        |
| A*03:81                          | P                                        | WD                                  | WD    |     |     | WD   |      |     |     |     | A*03:81                             |          | WD       |           |

Supplementary Table 3a. Comparison of HLA-A P group two-field assignments among CIWD catalogs <sup>a</sup>

| HLA-A IPD-<br>HLA/IMGT<br>3.31.0 | Nomenclature<br>Designation <sup>a</sup> | 3.0.0 CIWD                          |       |     |     |      |      |     |     |     | 2.0.0 CWD                           |          | EFI CWD  | China CWD |
|----------------------------------|------------------------------------------|-------------------------------------|-------|-----|-----|------|------|-----|-----|-----|-------------------------------------|----------|----------|-----------|
|                                  |                                          | Category by Population <sup>b</sup> |       |     |     |      |      |     |     |     | HLA-A<br>IPD-<br>IMGT/HL<br>A 3.9.0 | Category | Category | Category  |
|                                  |                                          | Highest<br>Frequency                | Total | AFA | API | EURO | MENA | HIS | NAM | UNK |                                     |          |          |           |
| A*03:86                          | P                                        | WD                                  | WD    |     |     | WD   |      |     |     |     | A*03:86                             |          | WD       |           |
| A*03:87                          | P                                        | WD                                  | WD    |     |     | WD   |      |     |     |     | A*03:87                             |          | WD       |           |
| A*03:89                          | P                                        | WD                                  | WD    |     |     | WD   |      |     |     |     | A*03:89                             |          | WD       |           |
| A*03:93                          | P                                        | WD                                  | WD    |     |     | WD   |      |     |     |     | A*03:93                             |          |          |           |
| A*03:94                          | P                                        | WD                                  | WD    |     |     | WD   |      |     |     |     | A*03:94                             |          |          |           |
| A*03:102                         | P                                        | WD                                  | WD    |     |     | WD   |      |     |     |     | A*03:102                            |          | WD       |           |
| A*03:103                         | P                                        | WD                                  | WD    |     |     |      |      |     |     |     | A*03:103                            |          |          |           |
| A*03:107                         | P                                        | WD                                  | WD    |     |     | WD   |      |     |     |     | A*03:107                            |          | WD       |           |
| A*03:108                         | P                                        | WD                                  | WD    |     |     | WD   |      |     |     |     | A*03:108                            | WD       |          |           |
| A*03:111                         | P                                        | WD                                  | WD    |     |     | WD   |      |     |     |     | A*03:111                            |          | WD       |           |
| A*03:120                         | P                                        | WD                                  | WD    |     |     | WD   |      |     |     |     | A*03:120                            |          | WD       |           |
| A*03:123                         | P                                        | WD                                  | WD    |     |     | WD   |      |     |     |     | A*03:123                            |          |          |           |
| A*03:144                         | P                                        | WD                                  | WD    |     |     | WD   |      |     |     |     | A*03:144                            |          |          |           |
| A*03:149                         | P                                        | WD                                  | WD    |     |     | WD   |      |     |     |     | A*03:149                            |          |          |           |
| A*03:154                         | P                                        | WD                                  | WD    |     |     |      |      |     |     |     | A*03:154                            |          |          |           |
| A*03:157                         | P                                        | WD                                  | WD    |     |     | WD   |      |     |     |     | A*03:157                            |          |          |           |
| A*03:167                         | P                                        | WD                                  | WD    |     |     |      |      |     |     |     | A*03:167                            |          |          |           |
| A*03:202                         | P                                        | WD                                  | WD    |     |     |      | WD   |     |     |     | A*03:202                            |          |          |           |
| A*03:216                         | P                                        | WD                                  | WD    |     |     |      | WD   |     |     |     | A*03:216                            |          |          |           |
| A*03:228                         | P                                        | WD                                  | WD    |     | WD  |      |      |     |     |     | A*03:228                            |          |          |           |
| A*11:01                          | P                                        | C                                   | C     | C   | C   | C    | C    | C   | C   | C   | A*11:01                             | C        | C        | C         |
| A*11:02                          | P                                        | C                                   | C     | WD  | C   | I    | WD   | I   | WD  | C   | A*11:02                             | C        | WD       | C         |
| A*11:03                          | P                                        | C                                   | C     | WD  | C   | WD   | WD   | WD  | C   | I   | A*11:03                             | WD       | WD       | C         |
| A*11:04                          | P                                        | C                                   | I     |     | C   | I    |      |     |     | I   | A*11:04                             | C        | WD       | WD        |
| A*11:05                          | P                                        | I                                   | I     | WD  |     | I    |      | I   |     | I   | A*11:05                             | WD       | WD       |           |
| A*11:06                          | P                                        | WD                                  | WD    |     |     |      |      |     |     |     | A*11:06                             |          |          | WD        |
| A*11:08                          | P                                        | I                                   | WD    |     |     | WD   |      | I   |     | WD  | A*11:08                             | WD       | WD       |           |

Supplementary Table 3a. Comparison of HLA-A P group two-field assignments among CIWD catalogs <sup>a</sup>

| HLA-A IPD-<br>HLA/IMGT<br>3.31.0 | Nomenclature<br>Designation <sup>a</sup> | 3.0.0 CIWD                          |       |     |     |      |      |     |     |     | 2.0.0 CWD                           |          | EFI CWD  | China CWD |
|----------------------------------|------------------------------------------|-------------------------------------|-------|-----|-----|------|------|-----|-----|-----|-------------------------------------|----------|----------|-----------|
|                                  |                                          | Category by Population <sup>b</sup> |       |     |     |      |      |     |     |     | HLA-A<br>IPD-<br>IMGT/HL<br>A 3.9.0 | Category | Category | Category  |
|                                  |                                          | Highest<br>Frequency                | Total | AFA | API | EURO | MENA | HIS | NAM | UNK |                                     |          |          |           |
| A*11:09                          | P                                        | WD                                  | WD    |     |     | WD   |      |     |     |     | A*11:09                             | WD       |          |           |
| A*11:10                          | P                                        | WD                                  | WD    |     |     | WD   |      |     |     |     | A*11:10                             | WD       |          |           |
| A*11:12                          | P                                        | I                                   | I     |     | WD  | I    |      | I   |     | I   | A*11:12                             | WD       | WD       | WD        |
| A*11:14                          | P                                        | o                                   | o     |     |     |      |      |     |     |     | A*11:14                             |          |          | WD        |
| A*11:15                          | P                                        | WD                                  | WD    |     | WD  | WD   |      |     |     |     | A*11:15                             |          | WD       |           |
| A*11:18                          | P                                        | WD                                  | WD    |     |     | WD   | WD   |     |     |     | A*11:18                             |          | WD       |           |
| A*11:19                          | P                                        | I                                   | WD    |     | I   | WD   |      |     |     |     | A*11:19                             | WD       | WD       | WD        |
| A*11:20                          | P                                        | I                                   | WD    |     | I   |      |      |     |     |     | A*11:20                             |          |          |           |
| A*11:21N                         | N                                        | WD                                  | WD    |     |     |      |      |     |     |     | A*11:21N                            |          |          |           |
| A*11:25                          | P                                        | WD                                  | WD    |     |     | WD   |      |     |     |     | A*11:25                             |          |          |           |
| A*11:27                          | P                                        | o                                   | o     |     |     |      |      |     |     |     | A*11:27                             |          |          | WD        |
| A*11:29                          | P                                        | I                                   | WD    |     |     | I    |      |     |     | WD  | A*11:29                             | WD       | WD       |           |
| A*11:30                          | P                                        | WD                                  | WD    |     |     | WD   |      |     |     |     | A*11:30                             | WD       | WD       |           |
| A*11:32                          | P                                        | WD                                  | WD    |     |     |      |      |     |     |     | A*11:32                             |          |          | WD        |
| A*11:36                          | P                                        | o                                   | o     |     |     |      |      |     |     |     | A*11:36                             |          |          | WD        |
| A*11:37                          | P                                        | WD                                  | WD    |     |     | WD   |      |     |     |     | A*11:37                             |          | WD       |           |
| A*11:39                          | P                                        | WD                                  | WD    |     |     | WD   |      |     |     |     | A*11:39                             |          |          |           |
| A*11:41                          | P                                        | WD                                  | WD    |     |     |      |      |     |     |     | A*11:41                             |          |          |           |
| A*11:44                          | P                                        | I                                   | WD    |     | I   |      |      |     |     |     | A*11:44                             |          |          |           |
| A*11:45                          | P                                        | WD                                  | WD    |     |     |      | WD   |     |     |     | A*11:45                             |          |          |           |
| A*11:46                          | P                                        | o                                   | o     |     |     |      |      |     |     |     | A*11:46                             |          | WD       |           |
| A*11:47                          | P                                        | WD                                  | WD    |     |     | WD   |      |     |     |     | A*11:47                             |          | WD       |           |
| A*11:56                          | P                                        | o                                   | o     |     |     |      |      |     |     |     | A*11:56                             |          |          | WD        |
| A*11:58                          | P                                        | I                                   | WD    |     | I   |      |      |     |     |     | A*11:58                             |          |          |           |
| A*11:60                          | P                                        | o                                   | o     |     |     |      |      |     |     |     | A*11:60                             |          |          | WD        |
| A*11:61                          | P                                        | o                                   | o     |     |     |      |      |     |     |     | A*11:61                             |          |          | WD        |
| A*11:63                          | P                                        | o                                   | o     |     |     |      |      |     |     |     | A*11:63                             |          | WD       |           |

Supplementary Table 3a. Comparison of HLA-A P group two-field assignments among CIWD catalogs <sup>a</sup>

| HLA-A IPD-<br>HLA/IMGT<br>3.31.0 | Nomenclature<br>Designation <sup>a</sup> | 3.0.0 CIWD                          |       |     |     |      |      |     |     |     | 2.0.0 CWD                           |          | EFI CWD  | China CWD |
|----------------------------------|------------------------------------------|-------------------------------------|-------|-----|-----|------|------|-----|-----|-----|-------------------------------------|----------|----------|-----------|
|                                  |                                          | Category by Population <sup>b</sup> |       |     |     |      |      |     |     |     | HLA-A<br>IPD-<br>IMGT/HL<br>A 3.9.0 | Category | Category | Category  |
|                                  |                                          | Highest<br>Frequency                | Total | AFA | API | EURO | MENA | HIS | NAM | UNK |                                     |          |          |           |
| A*11:64                          | P                                        | WD                                  | WD    |     | WD  |      |      |     |     |     | A*11:64                             |          |          |           |
| A*11:67                          | P                                        | WD                                  | WD    |     |     | WD   |      |     |     |     | A*11:67                             |          |          |           |
| A*11:69N                         | N                                        | o                                   | o     |     |     |      |      |     |     |     | A*11:69N                            |          |          | WD        |
| A*11:70                          | P                                        | WD                                  | WD    |     |     | WD   |      |     |     |     | A*11:70                             |          |          |           |
| A*11:74                          | P                                        | WD                                  | WD    |     |     | WD   |      |     |     |     | A*11:74                             |          |          |           |
| A*11:81                          | P                                        | WD                                  | WD    |     |     | WD   |      |     |     |     | A*11:81                             |          |          |           |
| A*11:87                          | P                                        | o                                   | o     |     |     |      |      |     |     |     | A*11:87                             |          |          | WD        |
| A*11:88                          | P                                        | o                                   | o     |     |     |      |      |     |     |     | A*11:88                             |          |          | WD        |
| A*11:89                          | P                                        | I                                   | WD    |     | I   |      |      |     |     |     | A*11:89                             |          |          |           |
| A*11:91                          | P                                        | WD                                  | WD    |     |     | WD   |      |     |     |     | A*11:91                             |          |          |           |
| A*11:92                          | P                                        | WD                                  | WD    |     |     | WD   |      |     |     |     | A*11:92                             |          |          |           |
| A*11:109N                        | N                                        | WD                                  | WD    |     |     | WD   |      |     |     |     | A*11:109N                           |          |          |           |
| A*11:117                         | P                                        | WD                                  | WD    |     |     | WD   |      |     |     |     | A*11:117                            |          |          |           |
| A*11:135                         | P                                        | o                                   | o     |     |     |      |      |     |     |     | A*11:135                            |          | WD       |           |
| A*11:159                         | P                                        | WD                                  | WD    |     | WD  |      |      |     |     |     | A*11:159                            |          |          |           |
| A*11:160                         | P                                        | WD                                  | WD    |     |     |      |      |     |     |     | A*11:160                            |          |          |           |
| A*11:161                         | P                                        | WD                                  | WD    |     | WD  |      |      |     |     |     | A*11:161                            |          |          |           |
| A*11:183                         | P                                        | I                                   | WD    |     | I   |      |      |     |     |     | A*11:183                            |          |          |           |
| A*11:187                         | P                                        | WD                                  | WD    |     | WD  |      |      |     |     |     | A*11:187                            |          |          |           |
| A*11:211                         | P                                        | WD                                  | WD    |     | WD  |      |      |     |     |     | A*11:211                            |          |          |           |
| A*11:221                         | P                                        | WD                                  | WD    |     |     | WD   |      |     |     |     | A*11:221                            |          |          |           |
| A*23:01                          | P                                        | C                                   | C     | C   | C   | C    | C    | C   | C   | C   | A*23:01                             | C        | C        | C         |
| A*23:02                          | P                                        | WD                                  | WD    | WD  |     |      |      |     |     |     | A*23:02                             |          | WD       |           |
| A*23:03                          | P                                        | WD                                  | WD    | WD  |     | WD   |      |     |     |     | A*23:03                             | WD       |          |           |
| A*23:04                          | P                                        | WD                                  | WD    | WD  |     |      |      |     |     |     | A*23:04                             | WD       |          |           |
| A*23:05                          | P                                        | C                                   | I     | WD  |     | WD   |      | C   | C   | I   | A*23:05                             | WD       |          |           |
| A*23:06                          | P                                        | WD                                  | WD    | WD  |     | WD   |      |     |     | WD  | A*23:06                             | WD       |          |           |

Supplementary Table 3a. Comparison of HLA-A P group two-field assignments among CIWD catalogs <sup>a</sup>

| HLA-A IPD-<br>HLA/IMGT<br>3.31.0 | Nomenclature<br>Designation <sup>a</sup> | 3.0.0 CIWD                          |       |     |     |      |      |     |     |     | 2.0.0 CWD                           |          | EFI CWD  | China CWD |
|----------------------------------|------------------------------------------|-------------------------------------|-------|-----|-----|------|------|-----|-----|-----|-------------------------------------|----------|----------|-----------|
|                                  |                                          | Category by Population <sup>b</sup> |       |     |     |      |      |     |     |     | HLA-A<br>IPD-<br>IMGT/HL<br>A 3.9.0 | Category | Category | Category  |
|                                  |                                          | Highest<br>Frequency                | Total | AFA | API | EURO | MENA | HIS | NAM | UNK |                                     |          |          |           |
| A*23:11N                         | N                                        | WD                                  | WD    | WD  |     |      |      |     |     |     | A*23:11N                            |          |          |           |
| A*23:12                          | P                                        | WD                                  | WD    |     |     | WD   |      |     |     |     | A*23:12                             |          |          |           |
| A*23:13                          | P                                        | WD                                  | WD    |     |     | WD   |      |     |     |     | A*23:13                             | WD       | WD       |           |
| A*23:14                          | P                                        | WD                                  | WD    |     |     |      |      |     |     |     | A*23:14                             |          |          |           |
| A*23:15                          | P                                        | C                                   | WD    | C   |     | WD   |      |     |     | I   | A*23:15                             | WD       |          |           |
| A*23:19N                         | N                                        | C                                   | WD    | C   |     |      |      |     |     | WD  | A*23:19N                            | WD       |          |           |
| A*23:23                          | P                                        | WD                                  | WD    |     |     | WD   |      |     |     |     | A*23:23                             |          | WD       |           |
| A*23:26                          | P                                        | o                                   | o     |     |     |      |      |     |     |     | A*23:26                             |          |          | WD        |
| A*23:30                          | P                                        | WD                                  | WD    |     |     |      | WD   |     |     |     | A*23:30                             |          |          |           |
| A*23:39                          | P                                        | WD                                  | WD    |     |     |      | WD   |     |     |     | A*23:39                             |          |          |           |
| A*23:47                          | P                                        | WD                                  | WD    |     |     | WD   |      |     |     |     | A*23:47                             |          |          |           |
| A*23:48                          | P                                        | WD                                  | WD    |     |     | WD   |      |     |     |     | A*23:48                             |          |          |           |
| A*23:53                          | P                                        | WD                                  | WD    |     |     | WD   |      |     |     |     | A*23:53                             |          |          |           |
| A*23:56                          | P                                        | WD                                  | WD    |     |     |      |      |     |     |     | A*23:56                             |          |          |           |
| A*24:02                          | P                                        | C                                   | C     | C   | C   | C    | C    | C   | C   | C   | A*24:02                             | C        | C        | C         |
| A*24:03                          | P                                        | C                                   | C     | C   | C   | C    | C    | C   | C   | C   | A*24:03                             | C        | C        | C         |
| A*24:04                          | P                                        | I                                   | WD    |     | I   | WD   |      |     |     |     | A*24:04                             | WD       | WD       | WD        |
| A*24:05                          | P                                        | C                                   | I     | WD  | I   | WD   |      | C   | C   | I   | A*24:05                             | WD       | WD       | WD        |
| A*24:06                          | P                                        | WD                                  | WD    |     | WD  | WD   |      |     |     |     | A*24:06                             | WD       | WD       | WD        |
| A*24:07                          | P                                        | C                                   | C     | C   | C   | C    | C    | C   | C   | C   | A*24:07                             | C        | C        | C         |
| A*24:08                          | P                                        | I                                   | WD    |     | I   |      |      |     |     | WD  | A*24:08                             | WD       | WD       | WD        |
| A*24:09N                         | N                                        | WD                                  | WD    |     |     | WD   |      |     |     |     | A*24:09N                            | WD       |          |           |
| A*24:10                          | P                                        | C                                   | C     |     | C   | WD   | WD   |     |     | C   | A*24:10                             | C        | WD       | WD        |
| A*24:11N                         | N                                        | I                                   | WD    |     | I   | WD   |      |     |     |     | A*24:11N                            | WD       |          |           |
| A*24:13                          | P                                        | I                                   | WD    |     | I   | WD   |      | I   |     | WD  | A*24:13                             | WD       |          | WD        |
| A*24:14                          | P                                        | C                                   | I     | WD  | WD  | WD   |      | C   | C   | I   | A*24:14                             | WD       |          |           |
| A*24:15                          | P                                        | WD                                  | WD    |     |     |      |      | WD  |     |     | A*24:15                             | WD       |          |           |

Supplementary Table 3a. Comparison of HLA-A P group two-field assignments among CIWD catalogs <sup>a</sup>

| HLA-A IPD-<br>HLA/IMGT<br>3.31.0 | Nomenclature<br>Designation <sup>a</sup> | 3.0.0 CIWD                          |       |     |     |      |      |     |     |     | 2.0.0 CWD                           |          | EFI CWD  | China CWD |
|----------------------------------|------------------------------------------|-------------------------------------|-------|-----|-----|------|------|-----|-----|-----|-------------------------------------|----------|----------|-----------|
|                                  |                                          | Category by Population <sup>b</sup> |       |     |     |      |      |     |     |     | HLA-A<br>IPD-<br>IMGT/HL<br>A 3.9.0 | Category | Category | Category  |
|                                  |                                          | Highest<br>Frequency                | Total | AFA | API | EURO | MENA | HIS | NAM | UNK |                                     |          |          |           |
| A*24:17                          | P                                        | C                                   | C     | WD  | C   | WD   | WD   |     | C   | I   | A*24:17                             | C        |          | WD        |
| A*24:18                          | P                                        | WD                                  | WD    |     |     | WD   |      |     |     |     | A*24:18                             |          |          |           |
| A*24:20                          | P                                        | C                                   | I     |     | C   | WD   | WD   |     |     | C   | A*24:20                             | C        |          | C         |
| A*24:21                          | P                                        | WD                                  | WD    |     | WD  | WD   |      |     |     | WD  | A*24:21                             |          |          | WD        |
| A*24:22                          | P                                        | C                                   | I     | WD  |     | WD   |      | C   | C   | I   | A*24:22                             | WD       |          |           |
| A*24:23                          | P                                        | C                                   | I     | C   | WD  | WD   |      | I   | C   | I   | A*24:23                             | WD       |          |           |
| A*24:24                          | P                                        | WD                                  | WD    | WD  |     |      |      |     |     |     | A*24:24                             |          |          |           |
| A*24:25                          | P                                        | C                                   | C     | WD  | WD  | WD   |      | C   | C   | C   | A*24:25                             | C        |          |           |
| A*24:26                          | P                                        | I                                   | I     | WD  |     | WD   | WD   | I   |     | I   | A*24:26                             | WD       |          |           |
| A*24:28                          | P                                        | I                                   | WD    |     |     | WD   |      | I   |     | WD  | A*24:28                             |          |          | WD        |
| A*24:29                          | P                                        | I                                   | I     |     |     | I    | WD   |     |     | WD  | A*24:29                             | WD       |          |           |
| A*24:30                          | P                                        | I                                   | WD    |     | I   | WD   |      |     |     |     | A*24:30                             | WD       |          | WD        |
| A*24:31                          | P                                        | I                                   | I     |     |     | I    |      |     |     | WD  | A*24:31                             | WD       |          |           |
| A*24:32                          | P                                        | I                                   | WD    |     |     | WD   |      |     |     | I   | A*24:32                             | WD       |          |           |
| A*24:35                          | P                                        | WD                                  | WD    |     |     | WD   |      |     |     |     | A*24:35                             | WD       |          |           |
| A*24:36N                         | N                                        | WD                                  | WD    |     |     | WD   |      |     |     |     | A*24:36N                            |          |          |           |
| A*24:37                          | P                                        | I                                   | WD    |     | I   |      |      |     |     | WD  | A*24:37                             | WD       |          |           |
| A*24:38                          | P                                        | I                                   | WD    |     |     |      |      | I   |     | WD  | A*24:38                             | WD       |          |           |
| A*24:39                          | P                                        | WD                                  | WD    |     |     | WD   |      |     |     |     | A*24:39                             |          |          |           |
| A*24:42                          | P                                        | WD                                  | WD    |     |     | WD   |      |     |     |     | A*24:42                             |          |          |           |
| A*24:43                          | P                                        | I                                   | WD    |     |     | I    |      |     |     | WD  | A*24:43                             | WD       |          |           |
| A*24:46                          | P                                        | WD                                  | WD    |     |     |      |      |     |     |     | A*24:46                             |          |          |           |
| A*24:47                          | P                                        | WD                                  | WD    |     |     | WD   |      |     |     |     | A*24:47                             | WD       |          |           |
| A*24:50                          | P                                        | WD                                  | WD    |     |     |      |      |     |     |     | A*24:50                             |          |          |           |
| A*24:52                          | P                                        | WD                                  | WD    |     |     | WD   | WD   |     |     | WD  | A*24:52                             |          |          | WD        |
| A*24:53                          | P                                        | C                                   | I     |     |     | WD   |      | C   | C   | I   | A*24:53                             | WD       |          |           |
| A*24:56                          | P                                        | I                                   | I     |     |     | I    | WD   |     |     | WD  | A*24:56                             | WD       |          |           |

Supplementary Table 3a. Comparison of HLA-A P group two-field assignments among CIWD catalogs <sup>a</sup>

| HLA-A IPD-<br>HLA/IMGT<br>3.31.0 | Nomenclature<br>Designation <sup>a</sup> | 3.0.0 CIWD                          |       |     |     |      |      |     |     |     | 2.0.0 CWD                           |          | EFI CWD  | China CWD |    |
|----------------------------------|------------------------------------------|-------------------------------------|-------|-----|-----|------|------|-----|-----|-----|-------------------------------------|----------|----------|-----------|----|
|                                  |                                          | Category by Population <sup>b</sup> |       |     |     |      |      |     |     |     | HLA-A<br>IPD-<br>IMGT/HL<br>A 3.9.0 | Category | Category | Category  |    |
|                                  |                                          | Highest<br>Frequency                | Total | AFA | API | EURO | MENA | HIS | NAM | UNK |                                     |          |          |           |    |
| A*24:57                          | P                                        | I                                   | WD    |     |     | WD   |      |     |     |     | I                                   | A*24:57  | WD       |           |    |
| A*24:58                          | P                                        | I                                   | I     |     |     | I    |      |     |     |     | WD                                  | A*24:58  | WD       |           |    |
| A*24:59                          | P                                        | o                                   | o     |     |     |      |      |     |     |     |                                     | A*24:59  |          |           | WD |
| A*24:64                          | P                                        | I                                   | WD    |     | I   |      |      |     |     |     |                                     | A*24:64  | WD       |           | WD |
| A*24:68                          | P                                        | WD                                  | WD    |     | WD  |      |      |     |     |     |                                     | A*24:68  |          |           | WD |
| A*24:71                          | P                                        | WD                                  | WD    |     |     | WD   |      |     |     |     |                                     | A*24:71  |          |           |    |
| A*24:72                          | P                                        | I                                   | I     |     |     | I    |      |     |     |     |                                     | A*24:72  | WD       |           |    |
| A*24:81                          | P                                        | I                                   | WD    |     |     | WD   |      |     |     |     | I                                   | A*24:81  | WD       |           |    |
| A*24:84N                         | N                                        | WD                                  | WD    |     |     | WD   |      |     |     |     |                                     | A*24:84N |          |           |    |
| A*24:85                          | P                                        | o                                   | o     |     |     |      |      |     |     |     |                                     | A*24:85  |          |           | WD |
| A*24:87                          | P                                        | WD                                  | WD    |     |     | WD   |      |     |     |     | WD                                  | A*24:87  |          |           |    |
| A*24:90N                         | N                                        | WD                                  | WD    |     |     | WD   |      |     |     |     |                                     | A*24:90N | WD       |           |    |
| A*24:91                          | P                                        | o                                   | o     |     |     |      |      |     |     |     |                                     | A*24:91  |          |           | WD |
| A*24:93                          | P                                        | o                                   | o     |     |     |      |      |     |     |     |                                     | A*24:93  |          |           | WD |
| A*24:95                          | P                                        | C                                   | WD    |     |     | WD   | WD   | C   |     |     | I                                   | A*24:95  | WD       |           |    |
| A*24:97                          | P                                        | I                                   | WD    |     | I   |      |      |     |     |     |                                     | A*24:97  |          |           |    |
| A*24:98                          | P                                        | o                                   | o     |     |     |      |      |     |     |     |                                     | A*24:98  |          |           | WD |
| A*24:103                         | P                                        | WD                                  | WD    |     |     | WD   |      |     |     |     |                                     | A*24:103 |          |           |    |
| A*24:104                         | P                                        | WD                                  | WD    |     |     | WD   |      |     |     |     |                                     | A*24:104 |          |           |    |
| A*24:105                         | P                                        | WD                                  | WD    |     |     | WD   |      |     |     |     |                                     | A*24:105 |          |           |    |
| A*24:106                         | P                                        | WD                                  | WD    |     |     | WD   |      |     |     |     |                                     | A*24:106 |          |           |    |
| A*24:107                         | P                                        | WD                                  | WD    |     |     |      |      |     |     |     |                                     | A*24:107 |          |           |    |
| A*24:108                         | P                                        | WD                                  | WD    |     |     |      |      |     |     |     |                                     | A*24:108 |          |           |    |
| A*24:110                         | P                                        | WD                                  | WD    |     |     | WD   |      |     |     |     |                                     | A*24:110 |          |           |    |
| A*24:112                         | P                                        | o                                   | o     |     |     |      |      |     |     |     |                                     | A*24:112 |          |           | WD |
| A*24:118                         | P                                        | WD                                  | WD    |     |     | WD   |      |     |     |     |                                     | A*24:118 |          |           |    |
| A*24:120                         | P                                        | WD                                  | WD    |     |     |      |      |     |     |     |                                     | A*24:120 |          |           |    |



Supplementary Table 3a. Comparison of HLA-A P group two-field assignments among CIWD catalogs <sup>a</sup>

| HLA-A IPD-<br>HLA/IMGT<br>3.31.0 | Nomenclature<br>Designation <sup>a</sup> | 3.0.0 CIWD                          |       |     |     |      |      |     |     |     | 2.0.0 CWD                           |          | EFI CWD  | China CWD |
|----------------------------------|------------------------------------------|-------------------------------------|-------|-----|-----|------|------|-----|-----|-----|-------------------------------------|----------|----------|-----------|
|                                  |                                          | Category by Population <sup>b</sup> |       |     |     |      |      |     |     |     | HLA-A<br>IPD-<br>IMGT/HL<br>A 3.9.0 | Category | Category | Category  |
|                                  |                                          | Highest<br>Frequency                | Total | AFA | API | EURO | MENA | HIS | NAM | UNK |                                     |          |          |           |
| A*24:121                         | P                                        | WD                                  | WD    |     |     | WD   |      |     |     |     | A*24:121                            |          |          |           |
| A*24:122                         | P                                        | WD                                  | WD    |     |     | WD   |      |     |     |     | A*24:122                            |          |          |           |
| A*24:123                         | P                                        | WD                                  | WD    |     |     |      | WD   |     |     |     | A*24:123                            |          |          |           |
| A*24:128                         | P                                        | o                                   | o     |     |     |      |      |     |     |     | A*24:128                            |          |          | WD        |
| A*24:130                         | P                                        | WD                                  | WD    |     | WD  |      |      |     |     |     | A*24:130                            |          |          |           |
| A*24:132N                        | N                                        | o                                   | o     |     |     |      |      |     |     |     | A*24:132N                           |          |          | WD        |
| A*24:138                         | P                                        | WD                                  | WD    |     |     |      |      |     |     |     | A*24:138                            |          |          |           |
| A*24:140                         | P                                        | WD                                  | WD    |     | WD  |      |      |     |     |     | A*24:140                            |          |          |           |
| A*24:141                         | P                                        | o                                   | o     |     |     |      |      |     |     |     | A*24:141                            |          |          | WD        |
| A*24:145                         | P                                        | I                                   | WD    |     |     | WD   |      |     |     | I   | A*24:145                            |          |          |           |
| A*24:146                         | P                                        | WD                                  | WD    |     |     |      | WD   |     |     |     | A*24:146                            |          |          |           |
| A*24:152                         | P                                        | o                                   | o     |     |     |      |      |     |     |     | A*24:152                            |          |          | WD        |
| A*24:159                         | P                                        | WD                                  | WD    |     |     |      |      | WD  |     |     | A*24:159                            |          |          |           |
| A*24:164                         | P                                        | WD                                  | WD    |     |     | WD   |      |     |     |     | A*24:164                            |          |          |           |
| A*24:165                         | P                                        | WD                                  | WD    |     | WD  |      |      |     |     |     | A*24:165                            |          |          |           |
| A*24:168                         | P                                        | WD                                  | WD    |     |     | WD   |      |     |     |     | A*24:168                            |          |          |           |
| A*24:169                         | P                                        | WD                                  | WD    |     |     | WD   |      |     |     |     | A*24:169                            |          |          |           |
| A*24:173                         | P                                        | WD                                  | WD    |     |     |      |      |     |     | WD  | A*24:173                            |          |          |           |
| A*24:175                         | P                                        | I                                   | WD    |     |     | WD   |      | WD  |     | I   | A*24:175                            |          |          |           |
| A*24:176                         | P                                        | WD                                  | WD    |     |     | WD   |      |     |     |     | A*24:176                            |          |          |           |
| A*24:180                         | P                                        | WD                                  | WD    |     |     |      |      | WD  |     |     | A*24:180                            |          |          |           |
| A*24:192                         | P                                        | WD                                  | WD    |     |     |      |      |     |     |     | A*24:192                            |          |          |           |
| A*24:193                         | P                                        | WD                                  | WD    |     |     | WD   |      |     |     |     | A*24:193                            |          |          |           |
| A*24:194                         | P                                        | WD                                  | WD    |     |     |      |      |     |     |     | A*24:194                            |          |          |           |
| A*24:196                         | P                                        | I                                   | WD    |     | I   |      |      |     |     |     | A*24:196                            |          |          |           |
| A*24:203                         | P                                        | WD                                  | WD    |     |     | WD   |      |     |     |     | A*24:203                            |          |          |           |
| A*24:205                         | P                                        | WD                                  | WD    |     |     |      |      |     |     |     | A*24:205                            |          |          |           |

Supplementary Table 3a. Comparison of HLA-A P group two-field assignments among CIWD catalogs <sup>a</sup>

| HLA-A IPD-<br>HLA/IMGT<br>3.31.0 | Nomenclature<br>Designation <sup>a</sup> | 3.0.0 CIWD                          |       |     |     |      |      |     |     |     | 2.0.0 CWD                           |          | EFI CWD  | China CWD |
|----------------------------------|------------------------------------------|-------------------------------------|-------|-----|-----|------|------|-----|-----|-----|-------------------------------------|----------|----------|-----------|
|                                  |                                          | Category by Population <sup>b</sup> |       |     |     |      |      |     |     |     | HLA-A<br>IPD-<br>IMGT/HL<br>A 3.9.0 | Category | Category | Category  |
|                                  |                                          | Highest<br>Frequency                | Total | AFA | API | EURO | MENA | HIS | NAM | UNK |                                     |          |          |           |
| A*24:206                         | P                                        | WD                                  | WD    |     |     | WD   |      |     |     |     | A*24:206                            |          |          |           |
| A*24:207                         | P                                        | WD                                  | WD    |     |     |      |      |     |     |     | A*24:207                            |          |          |           |
| A*24:220                         | P                                        | WD                                  | WD    |     |     |      |      |     |     |     | A*24:220                            |          |          |           |
| A*24:225                         | P                                        | o                                   | o     |     |     |      |      |     |     |     | A*24:225                            |          |          | WD        |
| A*24:226                         | P                                        | WD                                  | WD    |     |     | WD   |      |     |     |     | A*24:226                            |          |          |           |
| A*24:228                         | P                                        | WD                                  | WD    |     |     | WD   |      |     |     |     | A*24:228                            |          |          |           |
| A*24:234                         | P                                        | WD                                  | WD    |     |     |      |      |     |     |     | A*24:234                            |          |          |           |
| A*24:252N                        | N                                        | WD                                  | WD    |     |     | WD   | WD   |     |     |     | A*24:252N                           |          |          |           |
| A*25:01                          | P                                        | C                                   | C     | C   | C   | C    | C    | C   | C   | C   | A*25:01                             | C        | C        | WD        |
| A*25:02                          | P                                        | I                                   | WD    |     |     | I    |      |     |     | WD  | A*25:02                             | WD       | WD       |           |
| A*25:03                          | P                                        | WD                                  | WD    |     |     | WD   |      |     |     |     | A*25:03                             |          | WD       |           |
| A*25:04                          | P                                        | WD                                  | WD    |     |     | WD   |      |     |     |     | A*25:04                             |          |          |           |
| A*25:08                          | P                                        | WD                                  | WD    |     |     | WD   |      |     |     |     | A*25:08                             |          | WD       |           |
| A*25:11                          | P                                        | WD                                  | WD    |     |     | WD   |      |     |     |     | A*25:11                             |          |          |           |
| A*25:12N                         | N                                        | WD                                  | WD    |     |     | WD   |      |     |     |     | A*25:12N                            |          |          |           |
| A*25:13                          | P                                        | WD                                  | WD    |     |     |      |      |     |     |     | A*25:13                             |          | WD       |           |
| A*25:14                          | P                                        | WD                                  | WD    |     |     | WD   |      |     |     |     | A*25:14                             |          | WD       |           |
| A*25:16                          | P                                        | WD                                  | WD    |     |     | WD   |      |     |     |     | A*25:16                             |          |          |           |
| A*25:24                          | P                                        | WD                                  | WD    |     |     |      |      | WD  |     |     | A*25:24                             |          |          |           |
| A*26:01                          | P                                        | C                                   | C     | C   | C   | C    | C    | C   | C   | C   | A*26:01                             | C        | C        | C         |
| A*26:02                          | P                                        | C                                   | I     | WD  | C   | WD   |      | WD  |     | C   | A*26:02                             | WD       | WD       | WD        |
| A*26:03                          | P                                        | C                                   | I     |     | C   | WD   |      |     |     | C   | A*26:03                             | C        | WD       | WD        |
| A*26:05                          | P                                        | WD                                  | WD    |     | WD  |      |      |     |     | WD  | A*26:05                             |          | WD       |           |
| A*26:06                          | P                                        | WD                                  | WD    |     |     |      |      |     |     | WD  | A*26:06                             |          |          |           |
| A*26:07                          | P                                        | I                                   | I     |     | I   | WD   |      | I   |     | WD  | A*26:07                             | WD       |          |           |
| A*26:08                          | P                                        | C                                   | C     | C   | I   | C    | C    | C   | C   | C   | A*26:08                             | C        | C        | WD        |
| A*26:09                          | P                                        | I                                   | I     |     |     | I    | WD   |     |     | I   | A*26:09                             | WD       | WD       | WD        |

Supplementary Table 3a. Comparison of HLA-A P group two-field assignments among CIWD catalogs <sup>a</sup>

| HLA-A IPD-<br>HLA/IMGT<br>3.31.0 | Nomenclature<br>Designation <sup>a</sup> | 3.0.0 CIWD                          |       |     |     |      |      |     |     |     | 2.0.0 CWD                           |          | EFI CWD  | China CWD |    |
|----------------------------------|------------------------------------------|-------------------------------------|-------|-----|-----|------|------|-----|-----|-----|-------------------------------------|----------|----------|-----------|----|
|                                  |                                          | Category by Population <sup>b</sup> |       |     |     |      |      |     |     |     | HLA-A<br>IPD-<br>IMGT/HL<br>A 3.9.0 | Category | Category | Category  |    |
|                                  |                                          | Highest<br>Frequency                | Total | AFA | API | EURO | MENA | HIS | NAM | UNK |                                     |          |          |           |    |
| A*26:10                          | P                                        | WD                                  | WD    |     | WD  |      |      |     |     |     | A*26:10                             |          |          |           |    |
| A*26:12                          | P                                        | C                                   | I     | C   |     | WD   | WD   | I   |     |     | I                                   | A*26:12  | WD       | WD        |    |
| A*26:13                          | P                                        | WD                                  | WD    |     |     | WD   |      |     |     |     |                                     | A*26:13  | WD       | WD        |    |
| A*26:14                          | P                                        | I                                   | WD    |     | I   | WD   |      |     |     |     |                                     | A*26:14  | WD       | WD        | WD |
| A*26:15                          | P                                        | I                                   | I     |     |     | I    |      |     |     |     | I                                   | A*26:15  | WD       | WD        |    |
| A*26:16                          | P                                        | WD                                  | WD    |     |     | WD   | WD   |     |     |     |                                     | A*26:16  | WD       |           |    |
| A*26:17                          | P                                        | C                                   | I     |     | I   | WD   | C    | I   |     |     | I                                   | A*26:17  | WD       | WD        | WD |
| A*26:18                          | P                                        | I                                   | WD    |     | I   |      |      |     |     |     |                                     | A*26:18  | WD       |           | WD |
| A*26:20                          | P                                        | WD                                  | WD    |     |     |      |      |     |     |     |                                     | A*26:20  | WD       |           | WD |
| A*26:27                          | P                                        | I                                   | WD    |     |     | WD   |      | I   |     |     |                                     | A*26:27  |          |           |    |
| A*26:30                          | P                                        | WD                                  | WD    | WD  |     |      |      |     |     |     |                                     | A*26:30  |          |           |    |
| A*26:31                          | P                                        | WD                                  | WD    |     |     | WD   |      |     |     |     |                                     | A*26:31  | WD       |           |    |
| A*26:35                          | P                                        | o                                   | o     |     |     |      |      |     |     |     |                                     | A*26:35  |          |           | WD |
| A*26:36                          | P                                        | o                                   | o     |     |     |      |      |     |     |     |                                     | A*26:36  |          |           | WD |
| A*26:37                          | P                                        | WD                                  | WD    |     |     | WD   |      |     |     |     |                                     | A*26:37  |          | WD        |    |
| A*26:38                          | P                                        | WD                                  | WD    |     |     | WD   |      |     |     |     |                                     | A*26:38  |          | WD        |    |
| A*26:39                          | P                                        | WD                                  | WD    |     |     | WD   |      |     |     |     |                                     | A*26:39  |          | WD        |    |
| A*26:42                          | P                                        | WD                                  | WD    |     |     |      |      |     |     |     |                                     | A*26:42  |          |           |    |
| A*26:45                          | P                                        | WD                                  | WD    |     |     | WD   |      |     |     |     |                                     | A*26:45  |          | WD        |    |
| A*26:47                          | P                                        | WD                                  | WD    |     |     | WD   |      |     |     |     |                                     | A*26:47  |          |           |    |
| A*26:49                          | P                                        | WD                                  | WD    |     |     | WD   |      |     |     |     |                                     | A*26:49  |          |           |    |
| A*26:50                          | P                                        | o                                   | o     |     |     |      |      |     |     |     |                                     | A*26:50  |          |           | WD |
| A*26:52                          | P                                        | WD                                  | WD    |     |     |      |      |     |     |     |                                     | A*26:52  |          |           |    |
| A*26:59                          | P                                        | WD                                  | WD    |     |     |      |      |     |     |     |                                     | A*26:59  |          |           |    |
| A*26:62                          | P                                        | WD                                  | WD    |     |     | WD   |      |     |     |     |                                     | A*26:62  |          |           |    |
| A*26:63                          | P                                        | I                                   | WD    |     | I   |      |      |     |     |     |                                     | A*26:63  |          |           |    |
| A*26:65                          | P                                        | WD                                  | WD    |     |     | WD   |      |     |     |     |                                     | A*26:65  |          |           |    |

Supplementary Table 3a. Comparison of HLA-A P group two-field assignments among CIWD catalogs <sup>a</sup>

| HLA-A IPD-<br>HLA/IMGT<br>3.31.0 | Nomenclature<br>Designation <sup>a</sup> | 3.0.0 CIWD                          |       |     |     |      |      |     |     |     | 2.0.0 CWD                           |          | EFI CWD  | China CWD |
|----------------------------------|------------------------------------------|-------------------------------------|-------|-----|-----|------|------|-----|-----|-----|-------------------------------------|----------|----------|-----------|
|                                  |                                          | Category by Population <sup>b</sup> |       |     |     |      |      |     |     |     | HLA-A<br>IPD-<br>IMGT/HL<br>A 3.9.0 | Category | Category | Category  |
|                                  |                                          | Highest<br>Frequency                | Total | AFA | API | EURO | MENA | HIS | NAM | UNK |                                     |          |          |           |
| A*26:75                          | P                                        | WD                                  | WD    |     |     | WD   |      |     |     |     | A*26:75                             |          |          |           |
| A*26:76                          | P                                        | I                                   | WD    |     | I   |      |      |     |     |     | A*26:76                             |          |          |           |
| A*26:104                         | P                                        | WD                                  | WD    |     |     | WD   |      |     |     |     | A*26:104                            |          |          |           |
| A*29:01                          | P                                        | C                                   | C     | C   | C   | C    | C    | C   | C   | C   | A*29:01                             | C        | C        | C         |
| A*29:02                          | P                                        | C                                   | C     | C   | C   | C    | C    | C   | C   | C   | A*29:02                             | C        | C        | WD        |
| A*29:03                          | P                                        | WD                                  | WD    |     |     | WD   |      |     |     |     | A*29:03                             |          | WD       |           |
| A*29:04                          | P                                        | WD                                  | WD    |     |     | WD   |      |     |     | WD  | A*29:04                             | WD       |          |           |
| A*29:07                          | P                                        | WD                                  | WD    |     |     | WD   |      |     |     |     | A*29:07                             |          | WD       |           |
| A*29:09                          | P                                        | WD                                  | WD    |     |     | WD   |      |     |     |     | A*29:09                             | WD       |          |           |
| A*29:10                          | P                                        | C                                   | C     |     | WD  | C    | C    | I   |     | I   | A*29:10                             | WD       | C        | WD        |
| A*29:11                          | P                                        | WD                                  | WD    | WD  |     | WD   | WD   |     |     | WD  | A*29:11                             |          |          |           |
| A*29:12                          | P                                        | WD                                  | WD    |     |     | WD   | WD   |     |     | WD  | A*29:12                             | WD       | WD       |           |
| A*29:13                          | P                                        | WD                                  | WD    |     |     |      |      |     |     |     | A*29:13                             |          |          |           |
| A*29:14                          | P                                        | WD                                  | WD    |     |     |      |      |     |     |     | A*29:14                             |          |          |           |
| A*29:16                          | P                                        | WD                                  | WD    |     |     | WD   |      |     |     |     | A*29:16                             |          | WD       |           |
| A*29:21                          | P                                        | WD                                  | WD    |     |     | WD   |      |     |     |     | A*29:21                             |          | WD       |           |
| A*29:23                          | P                                        | WD                                  | WD    | WD  |     |      |      |     |     |     | A*29:23                             |          |          |           |
| A*29:32                          | P                                        | WD                                  | WD    |     |     | WD   |      |     |     |     | A*29:32                             |          |          |           |
| A*29:34                          | P                                        | WD                                  | WD    |     |     | WD   |      |     |     |     | A*29:34                             |          | WD       |           |
| A*29:40                          | P                                        | WD                                  | WD    |     |     |      |      |     |     |     | A*29:40                             |          |          |           |
| A*29:44                          | P                                        | WD                                  | WD    |     |     | WD   |      |     |     |     | A*29:44                             |          |          |           |
| A*29:48                          | P                                        | WD                                  | WD    |     |     | WD   |      |     |     |     | A*29:48                             |          |          |           |
| A*29:64                          | P                                        | WD                                  | WD    |     | WD  |      |      |     |     |     | A*29:64                             |          |          |           |
| A*29:88                          | P                                        | WD                                  | WD    |     |     |      |      |     |     |     | A*29:88                             |          |          |           |
| A*30:01                          | P                                        | C                                   | C     | C   | C   | C    | C    | C   | C   | C   | A*30:01                             | C        | C        | C         |
| A*30:02                          | P                                        | C                                   | C     | C   | C   | C    | C    | C   | C   | C   | A*30:02                             | C        | C        | WD        |
| A*30:03                          | P                                        | WD                                  | WD    |     |     | WD   |      |     |     |     | A*30:03                             | WD       |          |           |

Supplementary Table 3a. Comparison of HLA-A P group two-field assignments among CIWD catalogs <sup>a</sup>

| HLA-A IPD-<br>HLA/IMGT<br>3.31.0 | Nomenclature<br>Designation <sup>a</sup> | 3.0.0 CIWD                          |       |     |     |      |      |     |     |     | 2.0.0 CWD                           |          | EFI CWD  | China CWD |
|----------------------------------|------------------------------------------|-------------------------------------|-------|-----|-----|------|------|-----|-----|-----|-------------------------------------|----------|----------|-----------|
|                                  |                                          | Category by Population <sup>b</sup> |       |     |     |      |      |     |     |     | HLA-A<br>IPD-<br>IMGT/HL<br>A 3.9.0 | Category | Category | Category  |
|                                  |                                          | Highest<br>Frequency                | Total | AFA | API | EURO | MENA | HIS | NAM | UNK |                                     |          |          |           |
| A*30:04                          | P                                        | C                                   | C     | C   | C   | C    | C    | C   | C   | C   | A*30:04                             | C        | C        | WD        |
| A*30:07                          | P                                        | C                                   | WD    | C   |     |      |      |     |     | I   | A*30:07                             | WD       |          |           |
| A*30:08                          | P                                        | WD                                  | WD    | WD  |     |      | WD   |     |     |     | A*30:08                             | WD       |          |           |
| A*30:09                          | P                                        | I                                   | WD    | WD  |     |      | WD   | I   |     | WD  | A*30:09                             | WD       | WD       |           |
| A*30:10                          | P                                        | C                                   | C     | C   | I   | I    | C    | C   | C   | C   | A*30:10                             | WD       | WD       |           |
| A*30:11                          | P                                        | I                                   | WD    |     | I   | WD   |      |     |     |     | A*30:11                             | WD       | WD       |           |
| A*30:15                          | P                                        | WD                                  | WD    |     |     | WD   |      |     |     |     | A*30:15                             | WD       | WD       |           |
| A*30:16                          | P                                        | WD                                  | WD    | WD  |     |      |      |     |     |     | A*30:16                             | WD       |          |           |
| A*30:18                          | P                                        | WD                                  | WD    |     | WD  |      |      |     |     |     | A*30:18                             |          |          | WD        |
| A*30:20                          | P                                        | o                                   | o     |     |     |      |      |     |     |     | A*30:20                             |          |          | WD        |
| A*30:25                          | P                                        | WD                                  | WD    |     |     |      |      |     |     |     | A*30:25                             |          |          |           |
| A*30:28                          | P                                        | WD                                  | WD    | WD  |     |      |      |     |     |     | A*30:28                             |          |          |           |
| A*30:29                          | P                                        | WD                                  | WD    |     |     | WD   | WD   |     |     |     | A*30:29                             |          | WD       |           |
| A*30:30                          | P                                        | WD                                  | WD    |     |     | WD   |      |     |     |     | A*30:30                             |          |          |           |
| A*30:31                          | P                                        | WD                                  | WD    | WD  |     |      |      |     |     |     | A*30:31                             |          |          |           |
| A*30:36                          | P                                        | WD                                  | WD    |     |     | WD   |      |     |     |     | A*30:36                             |          | WD       |           |
| A*30:38                          | P                                        | o                                   | o     |     |     |      |      |     |     |     | A*30:38                             |          |          | WD        |
| A*30:40                          | P                                        | WD                                  | WD    |     |     | WD   |      |     |     |     | A*30:40                             |          | WD       |           |
| A*30:47                          | P                                        | WD                                  | WD    |     |     |      | WD   |     |     |     | A*30:47                             |          |          |           |
| A*30:51                          | P                                        | I                                   | WD    |     |     |      |      | I   |     |     | A*30:51                             |          |          |           |
| A*30:54                          | P                                        | WD                                  | WD    |     |     |      |      |     |     |     | A*30:54                             |          |          |           |
| A*30:56                          | P                                        | WD                                  | WD    |     |     |      |      |     |     |     | A*30:56                             |          |          |           |
| A*30:58                          | P                                        | WD                                  | WD    |     |     | WD   |      |     |     |     | A*30:58                             |          |          |           |
| A*30:70N                         | N                                        | WD                                  | WD    | WD  |     |      |      |     |     |     | A*30:70N                            |          |          |           |
| A*30:78N                         | N                                        | WD                                  | WD    | WD  |     |      |      |     |     |     | A*30:78N                            |          |          |           |
| A*31:01                          | P                                        | C                                   | C     | C   | C   | C    | C    | C   | C   | C   | A*31:01                             | C        | C        | C         |
| A*31:02                          | P                                        | C                                   | I     | WD  |     | WD   |      | C   | C   | C   | A*31:02                             | WD       | WD       |           |

Supplementary Table 3a. Comparison of HLA-A P group two-field assignments among CIWD catalogs <sup>a</sup>

| HLA-A IPD-<br>HLA/IMGT<br>3.31.0 | Nomenclature<br>Designation <sup>a</sup> | 3.0.0 CIWD                          |       |     |     |      |      |     |     |     | 2.0.0 CWD                           |          | EFI CWD  | China CWD |
|----------------------------------|------------------------------------------|-------------------------------------|-------|-----|-----|------|------|-----|-----|-----|-------------------------------------|----------|----------|-----------|
|                                  |                                          | Category by Population <sup>b</sup> |       |     |     |      |      |     |     |     | HLA-A<br>IPD-<br>IMGT/HL<br>A 3.9.0 | Category | Category | Category  |
|                                  |                                          | Highest<br>Frequency                | Total | AFA | API | EURO | MENA | HIS | NAM | UNK |                                     |          |          |           |
| A*31:03                          | P                                        | o                                   | o     |     |     |      |      |     |     |     | A*31:03                             | WD       |          |           |
| A*31:04                          | P                                        | C                                   | I     | C   |     | WD   | C    | WD  |     | I   | A*31:04                             | WD       | WD       |           |
| A*31:05                          | P                                        | WD                                  | WD    |     |     |      |      |     |     |     | A*31:05                             |          | WD       |           |
| A*31:06                          | P                                        | C                                   | I     |     | C   | WD   | WD   |     |     | I   | A*31:06                             | WD       | WD       | WD        |
| A*31:07                          | P                                        | I                                   | WD    |     |     |      |      | I   |     |     | A*31:07                             |          |          |           |
| A*31:08                          | P                                        | I                                   | I     |     |     | I    |      |     |     | WD  | A*31:08                             | WD       | C        |           |
| A*31:09                          | P                                        | C                                   | I     |     |     | WD   |      | C   | C   | I   | A*31:09                             | WD       |          |           |
| A*31:11                          | P                                        | I                                   | WD    |     | I   |      |      |     |     |     | A*31:11                             | WD       |          |           |
| A*31:12                          | P                                        | C                                   | I     |     | C   | WD   |      |     |     | I   | A*31:12                             | WD       |          |           |
| A*31:13                          | P                                        | I                                   | WD    |     | I   |      |      |     |     |     | A*31:13                             | WD       |          | WD        |
| A*31:14N                         | N                                        | WD                                  | WD    |     |     | WD   |      |     |     |     | A*31:14N                            |          |          |           |
| A*31:15                          | P                                        | C                                   | I     | WD  |     | WD   |      | C   |     | I   | A*31:15                             | WD       |          |           |
| A*31:16                          | P                                        | C                                   | I     |     | C   | WD   | WD   |     | WD  | WD  | A*31:16                             | WD       |          |           |
| A*31:17                          | P                                        | o                                   | o     |     |     |      |      |     |     |     | A*31:17                             |          |          | WD        |
| A*31:18                          | P                                        | I                                   | WD    |     |     |      |      | I   |     | WD  | A*31:18                             | WD       |          |           |
| A*31:19                          | P                                        | WD                                  | WD    |     |     | WD   |      |     |     |     | A*31:19                             |          |          |           |
| A*31:20                          | P                                        | WD                                  | WD    |     |     | WD   |      |     |     | WD  | A*31:20                             | WD       |          |           |
| A*31:25                          | P                                        | WD                                  | WD    |     |     | WD   |      |     |     |     | A*31:25                             |          |          |           |
| A*31:26                          | P                                        | WD                                  | WD    |     |     | WD   |      |     |     |     | A*31:26                             | WD       | WD       |           |
| A*31:27                          | P                                        | WD                                  | WD    |     |     | WD   |      |     |     |     | A*31:27                             |          | WD       |           |
| A*31:28                          | P                                        | WD                                  | WD    |     |     | WD   |      |     |     |     | A*31:28                             |          | WD       |           |
| A*31:30                          | P                                        | WD                                  | WD    |     |     |      |      |     |     |     | A*31:30                             |          |          | WD        |
| A*31:32                          | P                                        | o                                   | o     |     |     |      |      |     |     |     | A*31:32                             |          |          | WD        |
| A*31:33                          | P                                        | o                                   | o     |     |     |      |      |     |     |     | A*31:33                             |          |          | WD        |
| A*31:36                          | P                                        | I                                   | WD    |     |     |      |      | I   |     |     | A*31:36                             |          |          |           |
| A*31:38                          | P                                        | WD                                  | WD    |     |     | WD   |      |     |     |     | A*31:38                             |          | WD       |           |
| A*31:39                          | P                                        | WD                                  | WD    |     |     | WD   |      |     |     |     | A*31:39                             |          | WD       |           |

Supplementary Table 3a. Comparison of HLA-A P group two-field assignments among CIWD catalogs <sup>a</sup>

| HLA-A IPD-<br>HLA/IMGT<br>3.31.0 | Nomenclature<br>Designation <sup>a</sup> | 3.0.0 CIWD                          |       |     |     |      |      |     |     |     | 2.0.0 CWD                           |          | EFI CWD  | China CWD |   |
|----------------------------------|------------------------------------------|-------------------------------------|-------|-----|-----|------|------|-----|-----|-----|-------------------------------------|----------|----------|-----------|---|
|                                  |                                          | Category by Population <sup>b</sup> |       |     |     |      |      |     |     |     | HLA-A<br>IPD-<br>IMGT/HL<br>A 3.9.0 | Category | Category | Category  |   |
|                                  |                                          | Highest<br>Frequency                | Total | AFA | API | EURO | MENA | HIS | NAM | UNK |                                     |          |          |           |   |
| A*31:40                          | P                                        | I                                   | WD    |     |     | WD   |      |     |     |     | I                                   | A*31:40  |          |           |   |
| A*31:60N                         | N                                        | WD                                  | WD    |     |     |      |      |     |     |     |                                     | A*31:60N |          |           |   |
| A*31:68                          | P                                        | WD                                  | WD    |     | WD  |      |      |     |     |     |                                     | A*31:68  |          |           |   |
| A*31:88                          | P                                        | WD                                  | WD    |     |     |      | WD   |     |     |     |                                     | A*31:88  |          |           |   |
| A*32:01                          | P                                        | C                                   | C     | C   | C   | C    | C    | C   | C   | C   | C                                   | A*32:01  | C        | C         | C |
| A*32:02                          | P                                        | I                                   | WD    |     |     | WD   |      | I   |     |     | I                                   | A*32:02  | WD       | WD        |   |
| A*32:03                          | P                                        | I                                   | I     |     | WD  | I    |      |     |     |     | WD                                  | A*32:03  | WD       |           |   |
| A*32:04                          | P                                        | I                                   | I     |     |     | I    |      | WD  |     |     | I                                   | A*32:04  | WD       |           |   |
| A*32:05                          | P                                        | WD                                  | WD    |     | WD  |      |      |     |     |     |                                     | A*32:05  |          |           |   |
| A*32:06                          | P                                        | WD                                  | WD    |     |     | WD   |      |     |     |     |                                     | A*32:06  | WD       |           |   |
| A*32:07                          | P                                        | WD                                  | WD    |     |     | WD   |      |     |     |     | WD                                  | A*32:07  | WD       |           |   |
| A*32:08                          | P                                        | WD                                  | WD    |     |     | WD   |      |     |     |     | WD                                  | A*32:08  | WD       |           |   |
| A*32:11Q                         | Q                                        | I                                   | WD    |     | I   |      |      |     |     |     |                                     | A*32:11Q |          |           |   |
| A*32:12                          | P                                        | WD                                  | WD    |     |     | WD   |      |     |     |     |                                     | A*32:12  |          |           |   |
| A*32:16                          | P                                        | WD                                  | WD    |     |     | WD   |      |     |     |     |                                     | A*32:16  |          |           |   |
| A*32:17                          | P                                        | WD                                  | WD    |     |     | WD   |      |     |     |     |                                     | A*32:17  |          |           |   |
| A*32:18                          | P                                        | WD                                  | WD    |     |     | WD   |      |     |     |     |                                     | A*32:18  |          |           |   |
| A*32:21                          | P                                        | WD                                  | WD    |     |     |      |      |     |     |     |                                     | A*32:21  |          |           |   |
| A*32:22                          | P                                        | WD                                  | WD    |     |     |      |      |     |     |     |                                     | A*32:22  |          |           |   |
| A*32:26                          | P                                        | WD                                  | WD    |     |     |      |      |     |     |     | WD                                  | A*32:26  |          |           |   |
| A*32:27N                         | N                                        | WD                                  | WD    |     |     | WD   |      |     |     |     |                                     | A*32:27N |          |           |   |
| A*32:28                          | P                                        | WD                                  | WD    |     |     | WD   |      |     |     |     |                                     | A*32:28  |          |           |   |
| A*32:31                          | P                                        | WD                                  | WD    |     |     | WD   |      |     |     |     |                                     | A*32:31  |          |           |   |
| A*32:44                          | P                                        | WD                                  | WD    |     |     | WD   |      |     |     |     |                                     | A*32:44  |          |           |   |
| A*32:45N                         | N                                        | WD                                  | WD    |     |     | WD   |      |     |     |     |                                     | A*32:45N |          |           |   |
| A*32:47                          | P                                        | WD                                  | WD    |     |     |      |      |     |     |     |                                     | A*32:47  |          |           |   |
| A*32:55                          | P                                        | WD                                  | WD    |     |     | WD   |      |     |     |     |                                     | A*32:55  |          |           |   |

Supplementary Table 3a. Comparison of HLA-A P group two-field assignments among CIWD catalogs <sup>a</sup>

| HLA-A IPD-<br>HLA/IMGT<br>3.31.0 | Nomenclature<br>Designation <sup>a</sup> | 3.0.0 CIWD                          |       |     |     |      |      |     |     |     | 2.0.0 CWD                           |          | EFI CWD  | China CWD |
|----------------------------------|------------------------------------------|-------------------------------------|-------|-----|-----|------|------|-----|-----|-----|-------------------------------------|----------|----------|-----------|
|                                  |                                          | Category by Population <sup>b</sup> |       |     |     |      |      |     |     |     | HLA-A<br>IPD-<br>IMGT/HL<br>A 3.9.0 | Category | Category | Category  |
|                                  |                                          | Highest<br>Frequency                | Total | AFA | API | EURO | MENA | HIS | NAM | UNK |                                     |          |          |           |
| A*32:60                          | P                                        | WD                                  | WD    |     |     | WD   |      |     |     |     | A*32:60                             |          |          |           |
| A*32:62                          | P                                        | WD                                  | WD    |     |     | WD   |      |     |     |     | A*32:62                             |          |          |           |
| A*33:01                          | P                                        | C                                   | C     | C   | C   | C    | C    | C   | C   | C   | A*33:01                             | C        | C        | C         |
| A*33:03                          | P                                        | C                                   | C     | C   | C   | C    | C    | C   | C   | C   | A*33:03                             | C        | C        | C         |
| A*33:04                          | P                                        | I                                   | WD    |     |     | WD   |      | WD  |     | I   | A*33:04                             |          | WD       |           |
| A*33:05                          | P                                        | C                                   | C     | C   | I   | C    | C    | C   | C   | C   | A*33:05                             | WD       | C        |           |
| A*33:08                          | P                                        | WD                                  | WD    |     |     |      |      |     |     |     | A*33:08                             |          |          | WD        |
| A*33:09                          | P                                        | WD                                  | WD    |     |     | WD   |      |     |     |     | A*33:09                             | WD       | WD       |           |
| A*33:10                          | P                                        | I                                   | WD    |     | I   |      |      |     |     |     | A*33:10                             |          |          | WD        |
| A*33:11                          | P                                        | WD                                  | WD    |     |     |      |      |     |     |     | A*33:11                             |          |          |           |
| A*33:12                          | P                                        | WD                                  | WD    |     |     | WD   |      |     |     |     | A*33:12                             |          | WD       |           |
| A*33:13                          | P                                        | WD                                  | WD    |     | WD  |      |      |     |     |     | A*33:13                             |          |          |           |
| A*33:16                          | P                                        | WD                                  | WD    |     |     |      |      | WD  |     |     | A*33:16                             |          |          |           |
| A*33:26                          | P                                        | C                                   | WD    |     |     |      | C    |     |     |     | A*33:26                             |          |          |           |
| A*33:27                          | P                                        | WD                                  | WD    |     |     | WD   |      |     |     |     | A*33:27                             |          | WD       |           |
| A*33:30                          | P                                        | o                                   | o     |     |     |      |      |     |     |     | A*33:30                             |          |          | WD        |
| A*33:33                          | P                                        | WD                                  | WD    |     |     |      | WD   |     |     |     | A*33:33                             |          |          |           |
| A*33:34                          | P                                        | WD                                  | WD    |     |     | WD   |      |     |     |     | A*33:34                             |          |          |           |
| A*33:48                          | P                                        | I                                   | WD    |     | I   |      |      |     |     |     | A*33:48                             |          |          |           |
| A*33:55                          | P                                        | WD                                  | WD    |     | WD  |      |      |     |     |     | A*33:55                             |          |          |           |
| A*33:60                          | P                                        | WD                                  | WD    |     |     | WD   |      |     |     |     | A*33:60                             |          |          |           |
| A*33:64                          | P                                        | WD                                  | WD    |     |     | WD   |      |     |     |     | A*33:64                             |          |          |           |
| A*33:65                          | P                                        | I                                   | WD    |     | I   |      |      |     |     |     | A*33:65                             |          |          |           |
| A*34:01                          | P                                        | C                                   | C     | WD  | C   | I    | WD   | C   | C   | C   | A*34:01                             | C        |          | WD        |
| A*34:02                          | P                                        | C                                   | C     | C   | I   | C    | C    | C   | C   | C   | A*34:02                             | C        | C        | WD        |
| A*34:04                          | P                                        | WD                                  | WD    |     |     | WD   |      |     |     |     | A*34:04                             |          |          |           |
| A*34:05                          | P                                        | C                                   | I     |     | C   | WD   |      | I   |     | C   | A*34:05                             | C        | WD       |           |



Supplementary Table 3a. Comparison of HLA-A P group two-field assignments among CIWD catalogs <sup>a</sup>

| HLA-A IPD-<br>HLA/IMGT<br>3.31.0 | Nomenclature<br>Designation <sup>a</sup> | 3.0.0 CIWD                          |       |     |     |      |      |     |     |     | 2.0.0 CWD                           |          | EFI CWD  | China CWD |
|----------------------------------|------------------------------------------|-------------------------------------|-------|-----|-----|------|------|-----|-----|-----|-------------------------------------|----------|----------|-----------|
|                                  |                                          | Category by Population <sup>b</sup> |       |     |     |      |      |     |     |     | HLA-A<br>IPD-<br>IMGT/HL<br>A 3.9.0 | Category | Category | Category  |
|                                  |                                          | Highest<br>Frequency                | Total | AFA | API | EURO | MENA | HIS | NAM | UNK |                                     |          |          |           |
| A*34:06                          | P                                        | WD                                  | WD    |     |     | WD   |      |     |     |     | A*34:06                             |          |          |           |
| A*34:07                          | P                                        | WD                                  | WD    | WD  |     |      |      |     |     |     | A*34:07                             |          |          |           |
| A*34:08                          | P                                        | WD                                  | WD    |     |     |      |      |     |     |     | A*34:08                             |          |          |           |
| A*34:10N                         | N                                        | WD                                  | WD    | WD  |     |      |      |     |     |     | A*34:10N                            |          |          |           |
| A*36:01                          | P                                        | C                                   | C     | C   | I   | I    | C    | C   | C   | C   | A*36:01                             | C        | C        |           |
| A*36:02                          | P                                        | WD                                  | WD    |     |     |      |      |     |     |     | A*36:02                             | WD       |          | WD        |
| A*36:03                          | P                                        | C                                   | I     | C   |     |      | WD   | WD  |     | I   | A*36:03                             | WD       |          |           |
| A*36:04                          | P                                        | I                                   | WD    |     |     | WD   |      |     |     | I   | A*36:04                             | WD       | WD       |           |
| A*43:01                          | P                                        | C                                   | I     | C   | WD  | WD   | C    | WD  |     | I   | A*43:01                             | C        | WD       |           |
| A*66:01                          | P                                        | C                                   | C     | C   | C   | C    | C    | C   | C   | C   | A*66:01                             | C        | C        | WD        |
| A*66:02                          | P                                        | C                                   | C     | C   | WD  | I    | WD   | C   | C   | C   | A*66:02                             | C        |          |           |
| A*66:03                          | P                                        | C                                   | I     | C   |     | WD   | WD   | C   | C   | C   | A*66:03                             | WD       |          |           |
| A*66:04                          | P                                        | WD                                  | WD    | WD  |     |      |      |     |     |     | A*66:04                             | WD       |          |           |
| A*66:05                          | P                                        | WD                                  | WD    |     |     | WD   |      |     |     |     | A*66:05                             |          |          |           |
| A*66:13                          | P                                        | WD                                  | WD    |     |     | WD   |      |     |     |     | A*66:13                             |          |          |           |
| A*66:15                          | P                                        | WD                                  | WD    |     |     |      | WD   |     |     |     | A*66:15                             |          |          |           |
| A*68:01                          | P                                        | C                                   | C     | C   | C   | C    | C    | C   | C   | C   | A*68:01                             | C        | C        | C         |
| A*68:02                          | P                                        | C                                   | C     | C   | C   | C    | C    | C   | C   | C   | A*68:02                             | C        | C        | WD        |
| A*68:03                          | P                                        | C                                   | C     | C   | I   | I    | WD   | C   | C   | C   | A*68:03                             | C        | WD       |           |
| A*68:04                          | P                                        | WD                                  | WD    |     |     |      |      |     |     | WD  | A*68:04                             |          |          |           |
| A*68:05                          | P                                        | C                                   | C     | WD  | I   | WD   |      | C   | C   | C   | A*68:05                             | C        | WD       |           |
| A*68:06                          | P                                        | I                                   | WD    |     |     |      |      | I   |     | WD  | A*68:06                             | WD       |          |           |
| A*68:07                          | P                                        | C                                   | I     | WD  |     | WD   |      | C   | C   | I   | A*68:07                             | WD       | WD       |           |
| A*68:08                          | P                                        | WD                                  | WD    | WD  |     | WD   |      |     |     | WD  | A*68:08                             | WD       | WD       |           |
| A*68:09                          | P                                        | o                                   | o     |     |     |      |      |     |     |     | A*68:09                             |          | WD       |           |
| A*68:10                          | P                                        | C                                   | WD    | C   |     |      |      |     |     | I   | A*68:10                             | WD       |          |           |
| A*68:11N                         | N                                        | o                                   | o     |     |     |      |      |     |     |     | A*68:11N                            | WD       |          |           |

Supplementary Table 3a. Comparison of HLA-A P group two-field assignments among CIWD catalogs <sup>a</sup>

| HLA-A IPD-<br>HLA/IMGT<br>3.31.0 | Nomenclature<br>Designation <sup>a</sup> | 3.0.0 CIWD                          |       |     |     |      |      |     |     |     | 2.0.0 CWD                           |          | EFI CWD  | China CWD |
|----------------------------------|------------------------------------------|-------------------------------------|-------|-----|-----|------|------|-----|-----|-----|-------------------------------------|----------|----------|-----------|
|                                  |                                          | Category by Population <sup>b</sup> |       |     |     |      |      |     |     |     | HLA-A<br>IPD-<br>IMGT/HL<br>A 3.9.0 | Category | Category | Category  |
|                                  |                                          | Highest<br>Frequency                | Total | AFA | API | EURO | MENA | HIS | NAM | UNK |                                     |          |          |           |
| A*68:12                          | P                                        | C                                   | I     |     | WD  | I    | C    | I   | C   | I   | A*68:12                             | WD       | WD       |           |
| A*68:13                          | P                                        | C                                   | WD    |     |     | WD   | C    |     |     |     | A*68:13                             |          | WD       |           |
| A*68:15                          | P                                        | C                                   | I     | C   |     | WD   |      | I   |     | I   | A*68:15                             | WD       | WD       |           |
| A*68:16                          | P                                        | I                                   | I     |     |     | WD   |      | I   |     | I   | A*68:16                             |          | WD       |           |
| A*68:17                          | P                                        | C                                   | C     |     |     | I    |      | C   | C   | C   | A*68:17                             | WD       | WD       |           |
| A*68:18N                         | N                                        | WD                                  | WD    |     |     | WD   |      |     |     |     | A*68:18N                            |          |          |           |
| A*68:19                          | P                                        | WD                                  | WD    |     |     | WD   |      |     |     |     | A*68:19                             |          |          |           |
| A*68:20                          | P                                        | I                                   | WD    |     |     |      |      | I   |     | WD  | A*68:20                             | WD       |          |           |
| A*68:21                          | P                                        | WD                                  | WD    |     |     |      |      | WD  |     |     | A*68:21                             |          |          |           |
| A*68:22                          | P                                        | WD                                  | WD    |     |     | WD   |      |     |     |     | A*68:22                             | WD       |          |           |
| A*68:23                          | P                                        | I                                   | WD    |     |     | WD   |      | I   |     | I   | A*68:23                             |          |          |           |
| A*68:24                          | P                                        | C                                   | I     | WD  | C   | I    | WD   | I   |     | I   | A*68:24                             | WD       | C        | WD        |
| A*68:25                          | P                                        | I                                   | I     |     |     | I    |      |     |     | WD  | A*68:25                             | WD       | WD       |           |
| A*68:26                          | P                                        | WD                                  | WD    |     |     | WD   |      |     |     | WD  | A*68:26                             |          | WD       |           |
| A*68:27                          | P                                        | WD                                  | WD    |     |     | WD   |      |     |     |     | A*68:27                             | WD       |          |           |
| A*68:29                          | P                                        | WD                                  | WD    |     |     |      |      | WD  |     |     | A*68:29                             |          |          |           |
| A*68:30                          | P                                        | I                                   | WD    |     |     |      |      | I   |     |     | A*68:30                             | WD       |          |           |
| A*68:31                          | P                                        | I                                   | WD    |     |     |      |      | I   |     |     | A*68:31                             | WD       |          |           |
| A*68:32                          | P                                        | WD                                  | WD    |     |     | WD   |      |     |     |     | A*68:32                             |          |          |           |
| A*68:35                          | P                                        | I                                   | I     |     |     | I    |      |     |     | WD  | A*68:35                             | WD       | WD       |           |
| A*68:36                          | P                                        | WD                                  | WD    |     |     |      |      | WD  |     |     | A*68:36                             |          |          |           |
| A*68:37                          | P                                        | I                                   | WD    |     |     | I    |      |     |     |     | A*68:37                             | WD       | WD       |           |
| A*68:38                          | P                                        | WD                                  | WD    |     |     |      | WD   |     |     |     | A*68:38                             |          |          | WD        |
| A*68:40                          | P                                        | WD                                  | WD    | WD  |     |      |      |     |     |     | A*68:40                             | WD       |          |           |
| A*68:43                          | P                                        | WD                                  | WD    |     |     |      |      |     |     |     | A*68:43                             |          |          |           |
| A*68:45                          | P                                        | WD                                  | WD    |     |     |      |      |     |     |     | A*68:45                             |          |          |           |
| A*68:46                          | P                                        | WD                                  | WD    |     |     |      |      | WD  |     |     | A*68:46                             |          |          |           |

Supplementary Table 3a. Comparison of HLA-A P group two-field assignments among CIWD catalogs <sup>a</sup>

| HLA-A IPD-<br>HLA/IMGT<br>3.31.0 | Nomenclature<br>Designation <sup>a</sup> | 3.0.0 CIWD                          |       |     |     |      |      |     |     |     | 2.0.0 CWD                           |          | EFI CWD  | China CWD |
|----------------------------------|------------------------------------------|-------------------------------------|-------|-----|-----|------|------|-----|-----|-----|-------------------------------------|----------|----------|-----------|
|                                  |                                          | Category by Population <sup>b</sup> |       |     |     |      |      |     |     |     | HLA-A<br>IPD-<br>IMGT/HL<br>A 3.9.0 | Category | Category | Category  |
|                                  |                                          | Highest<br>Frequency                | Total | AFA | API | EURO | MENA | HIS | NAM | UNK |                                     |          |          |           |
| A*68:54                          | P                                        | WD                                  | WD    | WD  |     |      |      |     |     | WD  | A*68:54                             |          |          |           |
| A*68:55                          | P                                        | I                                   | WD    |     |     | WD   | WD   |     |     | I   | A*68:55                             |          |          |           |
| A*68:57                          | P                                        | WD                                  | WD    |     |     | WD   |      |     |     |     | A*68:57                             |          | WD       |           |
| A*68:60                          | P                                        | WD                                  | WD    |     |     |      |      |     |     |     | A*68:60                             |          |          |           |
| A*68:67                          | P                                        | WD                                  | WD    | WD  |     |      |      |     |     |     | A*68:67                             |          |          |           |
| A*68:68                          | P                                        | WD                                  | WD    | WD  |     |      |      |     |     |     | A*68:68                             |          |          |           |
| A*68:72                          | P                                        | WD                                  | WD    |     |     | WD   |      |     |     |     | A*68:72                             |          |          |           |
| A*68:85                          | P                                        | WD                                  | WD    |     |     |      |      | WD  |     |     | A*68:85                             |          |          |           |
| A*68:91                          | P                                        | WD                                  | WD    |     |     | WD   | WD   |     |     |     | A*68:91                             |          |          |           |
| A*68:95                          | P                                        | WD                                  | WD    |     |     | WD   |      |     |     |     | A*68:95                             |          |          |           |
| A*68:99                          | P                                        | I                                   | WD    |     | I   |      |      |     |     |     | A*68:99                             |          |          |           |
| A*68:101                         | P                                        | WD                                  | WD    |     |     | WD   |      |     |     |     | A*68:101                            |          |          |           |
| A*68:104                         | P                                        | WD                                  | WD    |     |     |      |      | WD  |     |     | A*68:104                            |          |          |           |
| A*69:01                          | P                                        | C                                   | C     | C   | C   | C    | C    | C   | C   | C   | A*69:01                             | C        | C        | C         |
| A*74:01                          | P                                        | C                                   | C     | C   | C   | C    | C    | C   | C   | C   | A*74:01                             | C        | WD       | WD        |
| A*74:03                          | P                                        | C                                   | C     | C   | I   | C    | C    | C   | WD  | C   | A*74:03                             | C        |          | WD        |
| A*74:05                          | P                                        | I                                   | WD    |     | I   | WD   |      |     |     |     | A*74:05                             | WD       |          | WD        |
| A*74:06                          | P                                        | I                                   | I     |     |     | I    |      |     |     | I   | A*74:06                             | WD       |          |           |
| A*74:07                          | P                                        | WD                                  | WD    |     |     |      |      |     |     |     | A*74:07                             |          |          |           |
| A*74:08                          | P                                        | I                                   | WD    |     |     |      |      | I   |     |     | A*74:08                             |          |          |           |
| A*74:09                          | P                                        | C                                   | I     | C   |     | WD   |      | WD  |     | I   | A*74:09                             | WD       |          |           |
| A*74:10                          | P                                        | WD                                  | WD    | WD  |     |      |      |     |     |     | A*74:10                             | WD       |          |           |
| A*74:11                          | P                                        | C                                   | I     | C   |     | WD   |      | I   | WD  | I   | A*74:11                             | WD       |          |           |
| A*74:13                          | P                                        | WD                                  | WD    |     |     |      |      |     |     |     | A*74:13                             | WD       |          | WD        |
| A*74:16                          | P                                        | WD                                  | WD    | WD  |     |      |      |     |     |     | A*74:16                             |          |          |           |
| A*80:01                          | P                                        | C                                   | C     | C   | I   | C    | C    | C   | C   | C   | A*80:01                             | C        | WD       |           |

**Supplementary Table 3a. Comparison of HLA-A P group two-field assignments among CIWD catalogs <sup>a</sup>**

|                                  |                                          | 3.0.0 CIWD                          |       |     |     |      |      |     |     |     | 2.0.0 CWD                           |          | EFI CWD  | China CWD |
|----------------------------------|------------------------------------------|-------------------------------------|-------|-----|-----|------|------|-----|-----|-----|-------------------------------------|----------|----------|-----------|
|                                  |                                          | Category by Population <sup>b</sup> |       |     |     |      |      |     |     |     |                                     |          |          |           |
| HLA-A IPD-<br>HLA/IMGT<br>3.31.0 | Nomenclature<br>Designation <sup>a</sup> | Highest<br>Frequency                | Total | AFA | API | EURO | MENA | HIS | NAM | UNK | HLA-A<br>IPD-<br>IMGT/HL<br>A 3.9.0 | Category | Category | Category  |

C, common; I, intermediate; WD, well-documented

<sup>a</sup> Alleles observed at least five times in any population group in the current dataset are included in this table. The exception are alleles that were observed in previous catalogs but that are not present or are observed less than five times. Note that this two-field designation is the equivalent of a "P" assignment so that expressed alleles within a P group that encode proteins that differ outside of the antigen recognition domain are not listed separately. For example, A\*23:17 is within the A\*23:01 two-field assignment and is not listed in this table even though it was categorized as well-documented in 2.0.0 CWD. The table does not list all alleles from IPD-IMGT/HLA version 3.31.0.

<sup>b</sup> Population groups include: AFA (African/African American), API (Asian/Pacific Islander), EURO (European/European descent), MENA (Middle East/North Coast of Africa), HIS (Hispanic), NAM (Native American) and UNK (unknown, multiple ancestries or other). Total is the overall population i.e., all groups combined. Highest frequency is the highest CIWD designation among all the individual groups.

<sup>c</sup> Any non-expressed alleles which are excluded from the P group are listed. For example, A\*01:04N is within the A\*01:01:01G group but is listed separately because it is not expressed.

<sup>d</sup> Not-CIWD, o.

### References

Mack SJ, Cano P, Hollenbach JA, He J, Hurley CK, Middleton D, Moraes ME, Pereira SE, Kempenich JH, Reed EF, Setterholm M, Smith AG, Tilanus MG, Torres M, Varney MD, Voorter CE, Fischer GF, Fleischhauer K, Goodridge D, Klitz W, Little AM, Maiers M, Marsh SG, Muller CR, Noreen H, Rozemuller EH, Sanchez-Mazas A, Senitzer D, Trachtenberg E, Fernandez-Vina M: Common and well-documented HLA alleles: 2012 update to the CWD catalogue. *Tissue Antigens* 81:194-203, 2013.

Sanchez-Mazas A, Nunes JM, Middleton D, Sauter J, Buhler S, McCabe A, Hofmann J, Baier DM, Schmidt AH, Nicoloso G, Andreani M, Grubic Z, Tiercy JM, Fleischhauer K: Common and well-documented HLA alleles over all of Europe and within European sub-regions: A catalogue from the European Federation for Immunogenetics. *HLA* 89:104-113, 2017.

He Y, Li J, Mao W, Zhang D, Liu M, Shan X, Zhang B, Zhu C, Shen J, Deng Z, Wang Z, Yu W, Chen Q, Guo W, Su P, Lv R, Li G, Li G, Pei B, Jiao L, Shen G, Liu Y, Feng Z, Su Y, Xie Y, Di W, Liu X, Yang X, Wang J, Qi J, Liu Q, Han Y, He J, Cai J, Zhang Z, Zhu F, Du D: HLA common and well-documented alleles in China. *HLA* 92:199-205, 2018.

Supplementary Table 3b. Comparison of HLA-B P group two-field assignments among CIWD catalogs <sup>a</sup>

|                                  |                                          | 3.0.0 CIWD                          |       |     |     |      |      |     |     |     | 2.0.0 CWD                       |          | EFI CWD  | China CWD |
|----------------------------------|------------------------------------------|-------------------------------------|-------|-----|-----|------|------|-----|-----|-----|---------------------------------|----------|----------|-----------|
|                                  |                                          | Category by Population <sup>b</sup> |       |     |     |      |      |     |     |     |                                 |          |          |           |
| HLA-B IPD-<br>HLA/IMGT<br>3.31.0 | Nomenclature<br>Designation <sup>a</sup> | Highest<br>Frequency                | Total | AFA | API | EURO | MENA | HIS | NAM | UNK | HLA-B IPD-<br>IMGT/HLA<br>3.9.0 | Category | Category | Category  |
| B*07:02                          | P                                        | C                                   | C     | C   | C   | C    | C    | C   | C   | C   | B*07:02                         | C        | C        | C         |
| B*07:03                          | P                                        | I                                   | I     |     |     | I    |      | WD  |     | I   | B*07:03                         | WD       | WD       |           |
| B*07:04                          | P                                        | C                                   | C     | WD  | WD  | C    | WD   | I   |     | C   | B*07:04                         | C        | C        |           |
| B*07:05                          | P                                        | C                                   | C     | C   | C   | C    | C    | C   | C   | C   | B*07:05                         | C        | C        | C         |
| B*07:07                          | P                                        | I                                   | I     | WD  |     | I    | WD   | I   |     | I   | B*07:07                         | WD       | WD       |           |
| B*07:08                          | P                                        | WD                                  | WD    |     |     | WD   |      |     |     |     | B*07:08                         | WD       | WD       | WD        |
| B*07:09                          | P                                        | C                                   | I     | C   | I   | I    |      | I   | C   | I   | B*07:09                         | WD       | WD       |           |
| B*07:10                          | P                                        | C                                   | I     | WD  | I   | C    | C    | I   |     | C   | B*07:10                         | C        | C        | WD        |
| B*07:12                          | P                                        | C                                   | WD    | C   |     |      |      |     |     | WD  | B*07:12                         | WD       |          |           |
| B*07:13                          | P                                        | WD                                  | WD    | WD  |     |      |      |     |     |     | B*07:13                         | WD       |          |           |
| B*07:14                          | P                                        | C                                   | I     |     |     | I    | C    | C   | WD  | I   | B*07:14                         | WD       | WD       |           |
| B*07:15                          | P                                        | I                                   | I     |     |     | I    |      |     |     | WD  | B*07:15                         | WD       | WD       |           |
| B*07:16                          | P                                        | WD                                  | WD    |     |     | WD   |      |     |     |     | B*07:16                         | WD       | WD       |           |
| B*07:17                          | P                                        | WD                                  | WD    |     |     |      |      |     |     |     | B*07:17                         |          |          |           |
| B*07:18                          | P                                        | I                                   | WD    |     | I   |      |      |     |     |     | B*07:18                         |          | WD       | WD        |
| B*07:19                          | P                                        | WD                                  | WD    |     |     | WD   |      |     |     |     | B*07:19                         |          |          |           |
| B*07:20                          | P                                        | I                                   | WD    |     |     | WD   |      | I   |     | WD  | B*07:20                         | WD       | WD       |           |
| B*07:22                          | P                                        | I                                   | WD    |     |     | WD   |      |     |     | I   | B*07:22                         |          |          |           |
| B*07:23                          | P                                        | WD                                  | WD    |     |     | WD   |      |     |     | WD  | B*07:23                         | WD       | WD       |           |
| B*07:24                          | P                                        | WD                                  | WD    |     |     | WD   |      |     |     |     | B*07:24                         |          | WD       |           |
| B*07:26                          | P                                        | I                                   | WD    |     | WD  | WD   |      | I   |     | WD  | B*07:26                         | WD       | WD       |           |
| B*07:29                          | P                                        | WD                                  | WD    |     |     |      |      |     |     |     | B*07:29                         |          |          |           |
| B*07:31                          | P                                        | WD                                  | WD    |     |     | WD   |      |     |     |     | B*07:31                         |          | WD       |           |
| B*07:33                          | P                                        | WD                                  | WD    |     | WD  | WD   |      |     |     |     | B*07:33                         |          | WD       |           |
| B*07:36                          | P                                        | WD                                  | WD    |     | WD  | WD   |      |     |     | WD  | B*07:36                         | WD       | WD       |           |
| B*07:37                          | P                                        | I                                   | WD    |     |     | WD   |      |     |     | I   | B*07:37                         | WD       | WD       |           |
| B*07:38                          | P                                        | WD                                  | WD    |     |     | WD   |      |     |     |     | B*07:38                         |          | WD       |           |
| B*07:42                          | P                                        | WD                                  | WD    |     |     | WD   |      |     |     | WD  | B*07:42                         | WD       |          |           |

Supplementary Table 3b. Comparison of HLA-B P group two-field assignments among CIWD catalogs <sup>a</sup>

|                                  |                                          | 3.0.0 CIWD                          |       |     |     |      |      |     |     |     | 2.0.0 CWD                       |          | EFI CWD  | China CWD |
|----------------------------------|------------------------------------------|-------------------------------------|-------|-----|-----|------|------|-----|-----|-----|---------------------------------|----------|----------|-----------|
|                                  |                                          | Category by Population <sup>b</sup> |       |     |     |      |      |     |     |     |                                 |          |          |           |
| HLA-B IPD-<br>HLA/IMGT<br>3.31.0 | Nomenclature<br>Designation <sup>a</sup> | Highest<br>Frequency                | Total | AFA | API | EURO | MENA | HIS | NAM | UNK | HLA-B IPD-<br>IMGT/HLA<br>3.9.0 | Category | Category | Category  |
| B*07:43                          | P                                        | o <sup>c</sup>                      | o     |     |     |      |      |     |     |     | B*07:43                         | WD       |          |           |
| B*07:46                          | P                                        | l                                   | WD    |     |     | WD   |      |     |     | l   | B*07:46                         | WD       | WD       |           |
| B*07:47                          | P                                        | l                                   | l     |     |     | l    |      |     |     | WD  | B*07:47                         |          | WD       |           |
| B*07:48                          | P                                        | WD                                  | WD    |     |     | WD   | WD   |     |     |     | B*07:48                         |          | WD       | WD        |
| B*07:51                          | P                                        | l                                   | WD    |     |     | WD   |      | l   |     |     | B*07:51                         | WD       |          |           |
| B*07:53                          | P                                        | WD                                  | WD    |     |     | WD   |      |     |     |     | B*07:53                         |          |          |           |
| B*07:56                          | P                                        | WD                                  | WD    |     |     |      |      |     |     | WD  | B*07:56                         |          |          |           |
| B*07:57                          | P                                        | WD                                  | WD    |     |     | WD   |      |     |     |     | B*07:57                         |          | WD       |           |
| B*07:62                          | P                                        | WD                                  | WD    |     |     | WD   |      |     |     |     | B*07:62                         |          | WD       |           |
| B*07:63                          | P                                        | WD                                  | WD    |     |     | WD   |      |     |     |     | B*07:63                         |          | WD       |           |
| B*07:67N                         | N                                        | WD                                  | WD    |     |     | WD   |      |     |     |     | B*07:67N                        |          | WD       |           |
| B*07:68                          | P                                        | WD                                  | WD    |     |     | WD   |      |     |     |     | B*07:68                         |          | WD       |           |
| B*07:71                          | P                                        | WD                                  | WD    |     |     |      |      |     |     |     | B*07:71                         |          |          |           |
| B*07:73                          | P                                        | WD                                  | WD    |     |     | WD   |      |     |     |     | B*07:73                         |          | WD       |           |
| B*07:74                          | P                                        | WD                                  | WD    |     |     | WD   |      |     |     |     | B*07:74                         |          | WD       |           |
| B*07:77                          | P                                        | WD                                  | WD    |     |     |      | WD   |     |     |     | B*07:77                         |          |          |           |
| B*07:80                          | P                                        | WD                                  | WD    |     | WD  |      |      |     |     |     | B*07:80                         |          |          |           |
| B*07:81                          | P                                        | WD                                  | WD    |     | WD  |      |      |     |     |     | B*07:81                         |          |          | WD        |
| B*07:85                          | P                                        | WD                                  | WD    |     |     |      |      |     |     |     | B*07:85                         |          |          |           |
| B*07:86                          | P                                        | WD                                  | WD    |     |     | WD   |      |     |     |     | B*07:86                         |          | WD       |           |
| B*07:87                          | P                                        | WD                                  | WD    |     |     | WD   |      |     |     |     | B*07:87                         |          | WD       |           |
| B*07:88                          | P                                        | WD                                  | WD    |     |     | WD   |      |     |     |     | B*07:88                         |          | WD       |           |
| B*07:90                          | P                                        | o                                   | o     |     |     |      |      |     |     |     | B*07:90                         |          | WD       |           |
| B*07:91                          | P                                        | o                                   | o     |     |     |      |      |     |     |     | B*07:91                         |          |          | WD        |
| B*07:92                          | P                                        | WD                                  | WD    |     |     | WD   |      |     |     |     | B*07:92                         |          | WD       |           |
| B*07:94                          | P                                        | WD                                  | WD    |     |     |      |      |     |     |     | B*07:94                         |          |          |           |
| B*07:95                          | P                                        | WD                                  | WD    |     |     | WD   |      |     |     |     | B*07:95                         |          | WD       |           |
| B*07:96                          | P                                        | WD                                  | WD    |     |     | WD   |      |     |     |     | B*07:96                         |          | WD       |           |

Supplementary Table 3b. Comparison of HLA-B P group two-field assignments among CIWD catalogs <sup>a</sup>

| HLA-B IPD-<br>HLA/IMGT<br>3.31.0 | Nomenclature<br>Designation <sup>a</sup> | 3.0.0 CIWD           |       |                                     |     |      |      |     |     |     | 2.0.0 CWD                       |          | EFI CWD  | China CWD |
|----------------------------------|------------------------------------------|----------------------|-------|-------------------------------------|-----|------|------|-----|-----|-----|---------------------------------|----------|----------|-----------|
|                                  |                                          | Highest<br>Frequency | Total | Category by Population <sup>b</sup> |     |      |      |     |     |     | HLA-B IPD-<br>IMGT/HLA<br>3.9.0 | Category | Category | Category  |
|                                  |                                          |                      |       | AFA                                 | API | EURO | MENA | HIS | NAM | UNK |                                 |          |          |           |
| B*07:98                          | P                                        | WD                   | WD    |                                     |     | WD   |      |     |     |     | B*07:98                         |          | WD       |           |
| B*07:102                         | P                                        | WD                   | WD    |                                     |     | WD   |      |     |     |     | B*07:102                        |          | WD       |           |
| B*07:103                         | P                                        | WD                   | WD    | WD                                  |     |      |      |     |     |     | B*07:103                        |          |          |           |
| B*07:104                         | P                                        | WD                   | WD    |                                     |     |      |      |     |     |     | B*07:104                        |          |          |           |
| B*07:105                         | P                                        | WD                   | WD    |                                     | WD  |      |      |     |     |     | B*07:105                        |          |          |           |
| B*07:106                         | P                                        | WD                   | WD    |                                     |     |      | WD   |     |     |     | B*07:106                        |          |          |           |
| B*07:109                         | P                                        | WD                   | WD    |                                     |     | WD   |      |     |     |     | B*07:109                        |          | WD       |           |
| B*07:110                         | P                                        | WD                   | WD    |                                     |     | WD   |      |     |     |     | B*07:110                        |          | WD       |           |
| B*07:112                         | P                                        | WD                   | WD    |                                     |     | WD   |      |     |     |     | B*07:112                        |          |          |           |
| B*07:113                         | P                                        | WD                   | WD    |                                     |     | WD   |      |     |     |     | B*07:113                        |          |          |           |
| B*07:116                         | P                                        | o                    | o     |                                     |     |      |      |     |     |     | B*07:116                        |          |          | WD        |
| B*07:122                         | P                                        | WD                   | WD    |                                     |     | WD   |      |     |     |     | B*07:122                        |          |          |           |
| B*07:125                         | P                                        | o                    | o     |                                     |     |      |      |     |     |     | B*07:125                        |          | WD       |           |
| B*07:131                         | P                                        | WD                   | WD    |                                     |     | WD   |      |     |     |     | B*07:131                        |          |          |           |
| B*07:132                         | P                                        | WD                   | WD    |                                     |     | WD   |      |     |     |     | B*07:132                        |          |          |           |
| B*07:136                         | P                                        | WD                   | WD    |                                     |     | WD   |      |     |     |     | B*07:136                        |          |          |           |
| B*07:143                         | P                                        | WD                   | WD    |                                     |     |      | WD   |     |     |     | B*07:143                        |          |          |           |
| B*07:151                         | P                                        | WD                   | WD    |                                     |     | WD   |      |     |     |     | B*07:151                        |          |          |           |
| B*07:158                         | P                                        | WD                   | WD    |                                     |     |      |      |     |     |     | B*07:158                        |          |          |           |
| B*07:165                         | P                                        | WD                   | WD    |                                     |     | WD   |      |     |     |     | B*07:165                        |          | WD       |           |
| B*07:181N                        | N                                        | WD                   | WD    |                                     |     | WD   |      |     |     |     | B*07:181N                       |          |          |           |
| B*07:188                         | P                                        | WD                   | WD    |                                     |     | WD   |      |     |     |     | B*07:188                        |          |          |           |
| B*07:193                         | P                                        | WD                   | WD    |                                     |     | WD   |      |     |     |     | B*07:193                        |          |          |           |
| B*07:206                         | P                                        | WD                   | WD    |                                     |     | WD   |      |     |     |     | B*07:206                        |          |          |           |
| B*07:208                         | P                                        | WD                   | WD    |                                     |     | WD   |      |     |     |     | B*07:208                        |          |          |           |
| B*07:222                         | P                                        | WD                   | WD    |                                     | WD  |      |      |     |     |     | B*07:222                        |          |          |           |
| B*07:237                         | P                                        | WD                   | WD    |                                     |     |      |      |     |     |     | B*07:237                        |          |          |           |
| B*08:01                          | P                                        | C                    | C     | C                                   | C   | C    | C    | C   | C   | C   | B*08:01                         | C        | C        | C         |

Supplementary Table 3b. Comparison of HLA-B P group two-field assignments among CIWD catalogs <sup>a</sup>

|                                  |                                          | 3.0.0 CIWD                          |       |     |     |      |      |     |     |     | 2.0.0 CWD                       |          | EFI CWD  | China CWD |
|----------------------------------|------------------------------------------|-------------------------------------|-------|-----|-----|------|------|-----|-----|-----|---------------------------------|----------|----------|-----------|
|                                  |                                          | Category by Population <sup>b</sup> |       |     |     |      |      |     |     |     |                                 |          |          |           |
| HLA-B IPD-<br>HLA/IMGT<br>3.31.0 | Nomenclature<br>Designation <sup>a</sup> | Highest<br>Frequency                | Total | AFA | API | EURO | MENA | HIS | NAM | UNK | HLA-B IPD-<br>IMGT/HLA<br>3.9.0 | Category | Category | Category  |
| B*08:02                          | P                                        | WD                                  | WD    |     |     | WD   |      |     |     |     | B*08:02                         | WD       | WD       |           |
| B*08:03                          | P                                        | WD                                  | WD    |     |     |      |      |     |     |     | B*08:03                         | WD       | WD       |           |
| B*08:04                          | P                                        | I                                   | WD    |     |     | WD   |      |     |     | I   | B*08:04                         | WD       | WD       |           |
| B*08:05                          | P                                        | o                                   | o     |     |     |      |      |     |     |     | B*08:05                         |          | WD       |           |
| B*08:07                          | P                                        | WD                                  | WD    |     |     | WD   |      |     |     |     | B*08:07                         | WD       | WD       |           |
| B*08:09                          | P                                        | I                                   | I     | WD  |     | I    |      | I   |     | I   | B*08:09                         | WD       | WD       |           |
| B*08:11                          | P                                        | WD                                  | WD    |     |     | WD   |      |     |     |     | B*08:11                         |          |          |           |
| B*08:12                          | P                                        | C                                   | WD    | C   |     | WD   |      |     |     | WD  | B*08:12                         |          | WD       |           |
| B*08:13                          | P                                        | WD                                  | WD    |     |     | WD   |      |     |     | WD  | B*08:13                         | WD       |          |           |
| B*08:14                          | P                                        | WD                                  | WD    |     |     | WD   |      |     |     |     | B*08:14                         |          | WD       |           |
| B*08:15                          | P                                        | WD                                  | WD    |     |     | WD   |      |     |     |     | B*08:15                         |          | WD       |           |
| B*08:16                          | P                                        | WD                                  | WD    | WD  |     |      |      |     |     |     | B*08:16                         |          |          |           |
| B*08:18                          | P                                        | I                                   | I     | WD  |     | I    |      | I   |     | I   | B*08:18                         | WD       | WD       |           |
| B*08:20                          | P                                        | WD                                  | WD    |     |     | WD   |      |     |     |     | B*08:20                         | WD       |          |           |
| B*08:21                          | P                                        | o                                   | o     |     |     |      |      |     |     |     | B*08:21                         |          | WD       |           |
| B*08:22                          | P                                        | WD                                  | WD    |     |     | WD   |      |     |     |     | B*08:22                         |          |          |           |
| B*08:23                          | P                                        | WD                                  | WD    | WD  |     | WD   |      |     |     |     | B*08:23                         | WD       | WD       |           |
| B*08:24                          | P                                        | I                                   | WD    |     |     | I    |      |     |     |     | B*08:24                         |          | WD       |           |
| B*08:25                          | P                                        | WD                                  | WD    |     |     | WD   |      |     |     |     | B*08:25                         |          | WD       |           |
| B*08:26                          | P                                        | WD                                  | WD    |     |     |      |      |     |     | WD  | B*08:26                         |          |          |           |
| B*08:28                          | P                                        | WD                                  | WD    |     |     | WD   |      |     |     |     | B*08:28                         |          | WD       |           |
| B*08:31                          | P                                        | WD                                  | WD    |     |     | WD   |      |     |     |     | B*08:31                         |          |          |           |
| B*08:33                          | P                                        | I                                   | WD    |     |     | WD   |      | I   |     | I   | B*08:33                         |          | WD       |           |
| B*08:34                          | P                                        | WD                                  | WD    |     |     | WD   |      |     |     |     | B*08:34                         |          | WD       |           |
| B*08:35                          | P                                        | WD                                  | WD    |     |     | WD   |      |     |     |     | B*08:35                         | WD       | WD       |           |
| B*08:36                          | P                                        | WD                                  | WD    |     |     |      |      |     |     |     | B*08:36                         |          |          |           |
| B*08:37                          | P                                        | WD                                  | WD    |     |     | WD   |      |     |     |     | B*08:37                         |          | WD       |           |
| B*08:39                          | P                                        | WD                                  | WD    |     |     | WD   |      |     |     |     | B*08:39                         |          | WD       |           |



Supplementary Table 3b. Comparison of HLA-B P group two-field assignments among CIWD catalogs <sup>a</sup>

|                                  |                                          | 3.0.0 CIWD                          |       |     |     |      |      |     |     |     | 2.0.0 CWD                       |          | EFI CWD  | China CWD |
|----------------------------------|------------------------------------------|-------------------------------------|-------|-----|-----|------|------|-----|-----|-----|---------------------------------|----------|----------|-----------|
|                                  |                                          | Category by Population <sup>b</sup> |       |     |     |      |      |     |     |     |                                 |          |          |           |
| HLA-B IPD-<br>HLA/IMGT<br>3.31.0 | Nomenclature<br>Designation <sup>a</sup> | Highest<br>Frequency                | Total | AFA | API | EURO | MENA | HIS | NAM | UNK | HLA-B IPD-<br>IMGT/HLA<br>3.9.0 | Category | Category | Category  |
| B*08:41                          | P                                        | WD                                  | WD    |     |     | WD   |      |     |     |     | B*08:41                         |          |          |           |
| B*08:50                          | P                                        | WD                                  | WD    |     |     |      |      |     |     |     | B*08:50                         |          |          |           |
| B*08:52                          | P                                        | WD                                  | WD    |     |     | WD   |      |     |     |     | B*08:52                         |          | WD       |           |
| B*08:56                          | P                                        | WD                                  | WD    |     |     |      |      |     |     |     | B*08:56                         |          |          |           |
| B*08:59                          | P                                        | I                                   | WD    |     | I   |      |      |     |     |     | B*08:59                         |          |          |           |
| B*08:63                          | P                                        | WD                                  | WD    |     |     | WD   |      |     |     |     | B*08:63                         |          | WD       |           |
| B*08:71                          | P                                        | WD                                  | WD    |     |     | WD   |      |     |     |     | B*08:71                         |          |          |           |
| B*08:75                          | P                                        | WD                                  | WD    |     |     | WD   |      |     |     |     | B*08:75                         |          |          |           |
| B*08:78                          | P                                        | WD                                  | WD    |     |     | WD   |      |     |     | WD  | B*08:78                         |          |          |           |
| B*08:88                          | P                                        | WD                                  | WD    |     |     | WD   |      |     |     |     | B*08:88                         |          |          |           |
| B*08:97                          | P                                        | WD                                  | WD    |     |     | WD   |      |     |     |     | B*08:97                         |          | WD       |           |
| B*08:104                         | P                                        | WD                                  | WD    |     |     | WD   |      |     |     |     | B*08:104                        |          |          |           |
| B*08:110                         | P                                        | WD                                  | WD    |     |     | WD   |      |     |     |     | B*08:110                        |          |          |           |
| B*13:01                          | P                                        | C                                   | C     | C   | C   | C    | C    | C   | C   | C   | B*13:01                         | C        | C        | C         |
| B*13:02                          | P                                        | C                                   | C     | C   | C   | C    | C    | C   | C   | C   | B*13:02                         | C        | C        | C         |
| B*13:03                          | P                                        | WD                                  | WD    | WD  |     | WD   | WD   |     |     |     | B*13:03                         | WD       |          |           |
| B*13:04                          | P                                        | WD                                  | WD    |     |     |      |      |     |     |     | B*13:04                         | WD       |          |           |
| B*13:06                          | P                                        | WD                                  | WD    |     |     |      |      |     |     |     | B*13:06                         |          |          |           |
| B*13:08                          | P                                        | WD                                  | WD    |     |     | WD   |      |     |     |     | B*13:08                         |          |          |           |
| B*13:10                          | P                                        | WD                                  | WD    |     |     | WD   |      |     |     |     | B*13:10                         | WD       |          |           |
| B*13:11                          | P                                        | WD                                  | WD    |     |     | WD   |      |     |     |     | B*13:11                         |          |          |           |
| B*13:12                          | P                                        | I                                   | WD    |     | I   |      |      |     |     | WD  | B*13:12                         | WD       |          |           |
| B*13:14                          | P                                        | WD                                  | WD    |     |     | WD   |      |     |     |     | B*13:14                         |          |          |           |
| B*13:16                          | P                                        | o                                   | o     |     |     |      |      |     |     |     | B*13:16                         |          |          | WD        |
| B*13:45                          | P                                        | WD                                  | WD    |     |     | WD   |      |     |     |     | B*13:45                         |          |          |           |
| B*13:47                          | P                                        | WD                                  | WD    |     |     | WD   |      |     |     |     | B*13:47                         |          |          |           |
| B*13:57                          | P                                        | WD                                  | WD    |     | WD  |      |      |     |     |     | B*13:57                         |          |          |           |
| B*14:01                          | P                                        | C                                   | C     | C   | C   | C    | C    | C   | C   | C   | B*14:01                         | C        | C        | WD        |

Supplementary Table 3b. Comparison of HLA-B P group two-field assignments among CIWD catalogs <sup>a</sup>

|                                  |                                          | 3.0.0 CIWD                          |       |     |     |      |      |     |     |     | 2.0.0 CWD                       |          | EFI CWD  | China CWD |
|----------------------------------|------------------------------------------|-------------------------------------|-------|-----|-----|------|------|-----|-----|-----|---------------------------------|----------|----------|-----------|
|                                  |                                          | Category by Population <sup>b</sup> |       |     |     |      |      |     |     |     |                                 |          |          |           |
| HLA-B IPD-<br>HLA/IMGT<br>3.31.0 | Nomenclature<br>Designation <sup>a</sup> | Highest<br>Frequency                | Total | AFA | API | EURO | MENA | HIS | NAM | UNK | HLA-B IPD-<br>IMGT/HLA<br>3.9.0 | Category | Category | Category  |
| B*14:02                          | P                                        | C                                   | C     | C   | C   | C    | C    | C   | C   | C   | B*14:02                         | C        | C        | C         |
| B*14:03                          | P                                        | C                                   | I     | C   | WD  | I    | C    | C   | C   | C   | B*14:03                         | C        | WD       |           |
| B*14:05                          | P                                        | C                                   | WD    | C   |     | WD   |      |     |     | I   | B*14:05                         | WD       |          |           |
| B*14:06                          | P                                        | WD                                  | WD    |     |     | WD   |      |     |     | WD  | B*14:06                         |          | WD       |           |
| B*14:07N                         | N                                        | WD                                  | WD    |     |     | WD   |      |     |     |     | B*14:07N                        |          | WD       |           |
| B*14:08                          | P                                        | WD                                  | WD    |     |     | WD   |      |     |     |     | B*14:08                         |          | WD       |           |
| B*14:09                          | P                                        | WD                                  | WD    | WD  |     |      |      |     |     |     | B*14:09                         | WD       |          |           |
| B*14:10                          | P                                        | WD                                  | WD    |     |     | WD   |      |     |     |     | B*14:10                         |          | WD       |           |
| B*14:18                          | P                                        | o                                   | o     |     |     |      |      |     |     |     | B*14:18                         |          | WD       |           |
| B*14:19                          | P                                        | WD                                  | WD    |     |     | WD   |      |     |     |     | B*14:19                         |          | WD       |           |
| B*14:20                          | P                                        | WD                                  | WD    |     |     | WD   |      |     |     |     | B*14:20                         |          |          |           |
| B*14:23                          | P                                        | WD                                  | WD    |     |     |      |      |     |     |     | B*14:23                         |          |          |           |
| B*14:29                          | P                                        | WD                                  | WD    |     |     | WD   |      |     |     |     | B*14:29                         |          |          |           |
| B*14:32                          | P                                        | WD                                  | WD    |     |     | WD   |      |     |     |     | B*14:32                         |          |          |           |
| B*15:01                          | P                                        | C                                   | C     | C   | C   | C    | C    | C   | C   | C   | B*15:01                         | C        | C        | C         |
| B*15:01N <sup>e</sup>            | N                                        | WD                                  | WD    |     |     | WD   |      |     |     |     | B*15:01N                        | WD       |          |           |
| B*15:02                          | P                                        | C                                   | C     | C   | C   | I    | C    | C   | C   | C   | B*15:02                         | C        | C        | C         |
| B*15:03                          | P                                        | C                                   | C     | C   | C   | C    | C    | C   | C   | C   | B*15:03                         | C        | WD       | WD        |
| B*15:04                          | P                                        | C                                   | C     | C   | C   | I    |      | C   | C   | C   | B*15:04                         | WD       |          |           |
| B*15:05                          | P                                        | C                                   | C     | WD  | C   | WD   | WD   | C   | C   | C   | B*15:05                         | WD       |          | C         |
| B*15:06                          | P                                        | C                                   | I     |     | C   | WD   |      | I   |     | I   | B*15:06                         | WD       |          |           |
| B*15:07                          | P                                        | C                                   | C     | C   | C   | C    | WD   | C   | C   | C   | B*15:07                         | C        | WD       | C         |
| B*15:08                          | P                                        | C                                   | C     | WD  | C   | C    | C    | C   | C   | C   | B*15:08                         | C        |          | WD        |
| B*15:09                          | P                                        | C                                   | C     | WD  | I   | C    | C    | C   | C   | C   | B*15:09                         | C        | WD       | WD        |
| B*15:10                          | P                                        | C                                   | C     | C   | C   | C    | C    | C   | C   | C   | B*15:10                         | C        | C        | WD        |
| B*15:11                          | P                                        | C                                   | C     |     | C   | I    | C    | I   |     | C   | B*15:11                         | C        | WD       | C         |
| B*15:12                          | P                                        | C                                   | C     |     | C   | WD   |      | I   |     | C   | B*15:12                         | C        |          | C         |
| B*15:13                          | P                                        | C                                   | C     | C   | C   | I    | WD   | I   |     | C   | B*15:13                         | C        | WD       | WD        |

Supplementary Table 3b. Comparison of HLA-B P group two-field assignments among CIWD catalogs <sup>a</sup>

|                                  |                                          | 3.0.0 CIWD                          |       |     |     |      |      |     |     |     | 2.0.0 CWD                       |          | EFI CWD  | China CWD |
|----------------------------------|------------------------------------------|-------------------------------------|-------|-----|-----|------|------|-----|-----|-----|---------------------------------|----------|----------|-----------|
|                                  |                                          | Category by Population <sup>b</sup> |       |     |     |      |      |     |     |     |                                 |          |          |           |
| HLA-B IPD-<br>HLA/IMGT<br>3.31.0 | Nomenclature<br>Designation <sup>a</sup> | Highest<br>Frequency                | Total | AFA | API | EURO | MENA | HIS | NAM | UNK | HLA-B IPD-<br>IMGT/HLA<br>3.9.0 | Category | Category | Category  |
| B*15:14                          | P                                        | WD                                  | WD    |     |     | WD   |      |     |     | WD  | B*15:14                         | WD       |          |           |
| B*15:15                          | P                                        | C                                   | C     | C   | I   | I    | WD   | C   | C   | C   | B*15:15                         | C        |          | WD        |
| B*15:16                          | P                                        | C                                   | C     | C   | I   | C    | C    | C   | C   | C   | B*15:16                         | C        | WD       | WD        |
| B*15:17                          | P                                        | C                                   | C     | C   | C   | C    | C    | C   | C   | C   | B*15:17                         | C        | C        | C         |
| B*15:18                          | P                                        | C                                   | C     | C   | C   | C    | C    | C   | C   | C   | B*15:18                         | C        | C        | C         |
| B*15:20                          | P                                        | C                                   | I     | WD  |     | I    |      | C   | C   | C   | B*15:20                         | WD       |          |           |
| B*15:21                          | P                                        | C                                   | C     | WD  | C   | I    | WD   | I   |     | C   | B*15:21                         | C        |          | WD        |
| B*15:23                          | P                                        | I                                   | I     | WD  |     | I    |      | I   |     | I   | B*15:23                         | WD       |          |           |
| B*15:24                          | P                                        | C                                   | C     | WD  | I   | C    | C    | C   | C   | C   | B*15:24                         | C        | WD       |           |
| B*15:25                          | P                                        | C                                   | C     | C   | C   | I    | C    | I   | C   | C   | B*15:25                         | C        |          | C         |
| B*15:27                          | P                                        | C                                   | C     |     | C   | I    | WD   | C   |     | C   | B*15:27                         | WD       |          | C         |
| B*15:28                          | P                                        | o                                   | o     |     |     |      |      |     |     |     | B*15:28                         | WD       |          |           |
| B*15:29                          | P                                        | C                                   | C     |     | C   | I    | C    | I   |     | C   | B*15:29                         | WD       |          | WD        |
| B*15:30                          | P                                        | C                                   | C     | WD  | I   | I    | WD   | C   | C   | C   | B*15:30                         | C        |          | WD        |
| B*15:31                          | P                                        | C                                   | I     | C   |     | WD   | C    | I   | WD  | I   | B*15:31                         | WD       |          |           |
| B*15:32                          | P                                        | C                                   | I     |     | C   | WD   | WD   | WD  |     | I   | B*15:32                         | C        |          | C         |
| B*15:33                          | P                                        | C                                   | I     |     |     | I    |      | I   | C   | I   | B*15:33                         | WD       |          |           |
| B*15:34                          | P                                        | I                                   | I     |     | I   | I    | WD   | I   |     | I   | B*15:34                         | C        |          |           |
| B*15:35                          | P                                        | C                                   | C     |     | C   | I    | WD   | C   | C   | C   | B*15:35                         | C        |          | WD        |
| B*15:37                          | P                                        | C                                   | I     | C   |     | WD   | WD   | I   | WD  | I   | B*15:37                         | WD       |          |           |
| B*15:38                          | P                                        | C                                   | I     |     | C   | WD   |      | I   |     | I   | B*15:38                         | WD       |          | WD        |
| B*15:39                          | P                                        | C                                   | C     | WD  | I   | C    | WD   | C   | C   | C   | B*15:39                         | C        |          | WD        |
| B*15:40                          | P                                        | C                                   | I     | WD  | WD  | WD   |      | C   | C   | I   | B*15:40                         | WD       |          |           |
| B*15:42                          | P                                        | WD                                  | WD    |     |     | WD   |      |     |     |     | B*15:42                         | WD       |          |           |
| B*15:44                          | P                                        | I                                   | WD    |     | I   |      |      |     |     | WD  | B*15:44                         | WD       |          |           |
| B*15:45                          | P                                        | I                                   | I     |     |     | I    |      |     |     | I   | B*15:45                         | WD       |          |           |
| B*15:46                          | P                                        | I                                   | WD    |     | I   |      |      |     |     |     | B*15:46                         | WD       |          | WD        |
| B*15:47                          | P                                        | C                                   | I     | C   |     | WD   | WD   | I   | C   | I   | B*15:47                         | WD       |          |           |

Supplementary Table 3b. Comparison of HLA-B P group two-field assignments among CIWD catalogs <sup>a</sup>

|                                  |                                          | 3.0.0 CIWD                          |       |     |     |      |      |     |     |     | 2.0.0 CWD                       |          | EFI CWD  | China CWD |
|----------------------------------|------------------------------------------|-------------------------------------|-------|-----|-----|------|------|-----|-----|-----|---------------------------------|----------|----------|-----------|
|                                  |                                          | Category by Population <sup>b</sup> |       |     |     |      |      |     |     |     |                                 |          |          |           |
| HLA-B IPD-<br>HLA/IMGT<br>3.31.0 | Nomenclature<br>Designation <sup>a</sup> | Highest<br>Frequency                | Total | AFA | API | EURO | MENA | HIS | NAM | UNK | HLA-B IPD-<br>IMGT/HLA<br>3.9.0 | Category | Category | Category  |
| B*15:48                          | P                                        | C                                   | I     |     |     | WD   |      | C   | C   | WD  | B*15:48                         | WD       |          |           |
| B*15:52                          | P                                        | C                                   | WD    | C   |     |      |      |     |     | I   | B*15:52                         | WD       |          |           |
| B*15:53                          | P                                        | WD                                  | WD    |     |     |      |      |     |     |     | B*15:53                         | WD       |          |           |
| B*15:54                          | P                                        | C                                   | WD    | C   |     |      |      |     |     | WD  | B*15:54                         | WD       |          |           |
| B*15:55                          | P                                        | I                                   | WD    |     |     |      | WD   | I   |     |     | B*15:55                         | WD       |          |           |
| B*15:56                          | P                                        | WD                                  | WD    |     | WD  |      |      |     |     |     | B*15:56                         | WD       |          |           |
| B*15:57                          | P                                        | WD                                  | WD    |     |     | WD   |      |     |     |     | B*15:57                         |          |          |           |
| B*15:58                          | P                                        | I                                   | WD    |     | I   |      |      |     |     | WD  | B*15:58                         | WD       |          | WD        |
| B*15:62                          | P                                        | WD                                  | WD    | WD  |     |      |      |     |     |     | B*15:62                         |          |          |           |
| B*15:63                          | P                                        | C                                   | WD    |     |     | WD   |      | I   | C   | I   | B*15:63                         | WD       |          |           |
| B*15:64                          | P                                        | I                                   | WD    |     | I   |      |      |     |     |     | B*15:64                         |          |          |           |
| B*15:65                          | P                                        | WD                                  | WD    |     |     | WD   |      | WD  |     | WD  | B*15:65                         | WD       |          | WD        |
| B*15:67                          | P                                        | WD                                  | WD    | WD  |     |      | WD   |     |     | WD  | B*15:67                         |          |          |           |
| B*15:68                          | P                                        | o                                   | o     |     |     |      |      |     |     |     | B*15:68                         |          |          | WD        |
| B*15:69                          | P                                        | WD                                  | WD    |     |     |      |      |     |     | WD  | B*15:69                         |          |          |           |
| B*15:70                          | P                                        | WD                                  | WD    |     |     | WD   |      | WD  |     |     | B*15:70                         |          |          |           |
| B*15:71                          | P                                        | I                                   | I     |     |     | I    | WD   | WD  |     | I   | B*15:71                         | WD       |          |           |
| B*15:72                          | P                                        | WD                                  | WD    |     | WD  |      |      |     |     |     | B*15:72                         |          |          |           |
| B*15:73                          | P                                        | I                                   | I     |     |     | I    | WD   |     |     | I   | B*15:73                         | WD       |          |           |
| B*15:75                          | P                                        | C                                   | I     |     | C   |      | WD   |     |     |     | B*15:75                         | WD       |          |           |
| B*15:76                          | P                                        | WD                                  | WD    |     |     | WD   |      |     |     |     | B*15:76                         |          |          |           |
| B*15:78                          | P                                        | WD                                  | WD    |     |     | WD   |      |     |     |     | B*15:78                         |          |          | WD        |
| B*15:79N                         | N                                        | WD                                  | WD    |     |     | WD   |      |     |     |     | B*15:79N                        |          | WD       |           |
| B*15:80                          | P                                        | WD                                  | WD    |     |     |      |      |     |     |     | B*15:80                         |          |          |           |
| B*15:82                          | P                                        | I                                   | I     |     |     | I    |      |     |     | I   | B*15:82                         | WD       |          |           |
| B*15:83                          | P                                        | WD                                  | WD    | WD  |     |      |      |     |     |     | B*15:83                         |          |          |           |
| B*15:86                          | P                                        | o                                   | o     |     |     |      |      |     |     |     | B*15:86                         |          |          | WD        |
| B*15:87                          | P                                        | WD                                  | WD    |     |     |      |      |     |     |     | B*15:87                         |          |          |           |

Supplementary Table 3b. Comparison of HLA-B P group two-field assignments among CIWD catalogs <sup>a</sup>

|                                  |                                          | 3.0.0 CIWD                          |       |     |     |      |      |     |     |     | 2.0.0 CWD                       |          | EFI CWD  | China CWD |
|----------------------------------|------------------------------------------|-------------------------------------|-------|-----|-----|------|------|-----|-----|-----|---------------------------------|----------|----------|-----------|
|                                  |                                          | Category by Population <sup>b</sup> |       |     |     |      |      |     |     |     |                                 |          |          |           |
| HLA-B IPD-<br>HLA/IMGT<br>3.31.0 | Nomenclature<br>Designation <sup>a</sup> | Highest<br>Frequency                | Total | AFA | API | EURO | MENA | HIS | NAM | UNK | HLA-B IPD-<br>IMGT/HLA<br>3.9.0 | Category | Category | Category  |
| B*15:88                          | P                                        | WD                                  | WD    |     | WD  |      |      |     |     |     | B*15:88                         |          |          | WD        |
| B*15:89                          | P                                        | WD                                  | WD    |     | WD  |      |      |     |     |     | B*15:89                         |          |          |           |
| B*15:96                          | P                                        | WD                                  | WD    |     |     | WD   |      |     |     |     | B*15:96                         |          |          |           |
| B*15:98                          | P                                        | WD                                  | WD    |     |     | WD   |      |     |     |     | B*15:98                         |          |          |           |
| B*15:106                         | P                                        | WD                                  | WD    |     | WD  |      |      |     |     |     | B*15:106                        |          |          |           |
| B*15:108                         | P                                        | WD                                  | WD    |     |     | WD   |      | WD  |     |     | B*15:108                        |          |          |           |
| B*15:110                         | P                                        | I                                   | WD    |     |     |      |      | I   |     |     | B*15:110                        |          |          |           |
| B*15:113                         | P                                        | I                                   | WD    |     | I   |      |      |     |     |     | B*15:113                        | WD       |          |           |
| B*15:117                         | P                                        | WD                                  | WD    |     |     | WD   |      |     |     |     | B*15:117                        |          |          |           |
| B*15:122                         | P                                        | WD                                  | WD    |     |     | WD   |      |     |     |     | B*15:122                        |          |          |           |
| B*15:123                         | P                                        | WD                                  | WD    |     |     |      | WD   |     |     |     | B*15:123                        |          |          |           |
| B*15:125                         | P                                        | I                                   | I     |     |     | I    |      |     |     |     | B*15:125                        | WD       |          |           |
| B*15:128                         | P                                        | WD                                  | WD    |     |     | WD   |      |     |     |     | B*15:128                        |          |          |           |
| B*15:132                         | P                                        | WD                                  | WD    |     |     | WD   |      |     |     | WD  | B*15:132                        | WD       |          |           |
| B*15:134                         | P                                        | o                                   | o     |     |     |      |      |     |     |     | B*15:134                        |          |          | WD        |
| B*15:135                         | P                                        | I                                   | WD    |     |     | I    |      |     |     | WD  | B*15:135                        |          |          |           |
| B*15:141                         | P                                        | I                                   | WD    |     | I   |      |      |     |     | I   | B*15:141                        | WD       |          |           |
| B*15:142                         | P                                        | WD                                  | WD    |     |     | WD   |      |     |     |     | B*15:142                        |          |          |           |
| B*15:147                         | P                                        | WD                                  | WD    |     |     | WD   |      |     |     | WD  | B*15:147                        |          |          |           |
| B*15:150                         | P                                        | I                                   | WD    |     |     |      |      | I   |     |     | B*15:150                        |          |          |           |
| B*15:152                         | P                                        | o                                   | o     |     |     |      |      |     |     |     | B*15:152                        |          |          | WD        |
| B*15:153                         | P                                        | WD                                  | WD    |     |     | WD   |      |     |     | WD  | B*15:153                        |          |          |           |
| B*15:154                         | P                                        | WD                                  | WD    |     |     | WD   |      |     |     |     | B*15:154                        |          |          |           |
| B*15:157                         | P                                        | WD                                  | WD    |     |     | WD   |      |     |     |     | B*15:157                        |          |          |           |
| B*15:158                         | P                                        | WD                                  | WD    | WD  |     |      |      |     |     |     | B*15:158                        |          |          |           |
| B*15:159                         | P                                        | WD                                  | WD    |     | WD  |      |      |     |     |     | B*15:159                        |          |          |           |
| B*15:160                         | P                                        | WD                                  | WD    |     |     | WD   |      |     |     |     | B*15:160                        |          |          |           |
| B*15:162                         | P                                        | I                                   | WD    |     |     |      | WD   |     |     | I   | B*15:162                        |          |          |           |

Supplementary Table 3b. Comparison of HLA-B P group two-field assignments among CIWD catalogs <sup>a</sup>

|                                  |                                          | 3.0.0 CIWD                          |       |     |     |      |      |     |     |     | 2.0.0 CWD                       |          | EFI CWD  | China CWD |
|----------------------------------|------------------------------------------|-------------------------------------|-------|-----|-----|------|------|-----|-----|-----|---------------------------------|----------|----------|-----------|
|                                  |                                          | Category by Population <sup>b</sup> |       |     |     |      |      |     |     |     |                                 |          |          |           |
| HLA-B IPD-<br>HLA/IMGT<br>3.31.0 | Nomenclature<br>Designation <sup>a</sup> | Highest<br>Frequency                | Total | AFA | API | EURO | MENA | HIS | NAM | UNK | HLA-B IPD-<br>IMGT/HLA<br>3.9.0 | Category | Category | Category  |
| B*15:164                         | P                                        | WD                                  | WD    |     |     | WD   |      |     |     |     | B*15:164                        |          |          |           |
| B*15:167                         | P                                        | WD                                  | WD    |     |     | WD   |      |     |     |     | B*15:167                        |          |          |           |
| B*15:170                         | P                                        | I                                   | WD    |     | I   |      |      |     |     |     | B*15:170                        |          |          |           |
| B*15:172                         | P                                        | WD                                  | WD    |     |     | WD   |      |     |     |     | B*15:172                        |          |          |           |
| B*15:173                         | P                                        | WD                                  | WD    |     |     | WD   |      |     |     |     | B*15:173                        |          |          |           |
| B*15:174                         | P                                        | WD                                  | WD    |     |     | WD   |      |     |     |     | B*15:174                        |          |          |           |
| B*15:175                         | P                                        | WD                                  | WD    |     |     |      |      |     |     |     | B*15:175                        |          |          |           |
| B*15:178                         | P                                        | o                                   | o     |     |     |      |      |     |     |     | B*15:178                        |          |          | WD        |
| B*15:181N                        | N                                        | WD                                  | WD    |     |     | WD   |      |     |     |     | B*15:181N                       |          | WD       |           |
| B*15:183                         | P                                        | WD                                  | WD    |     |     | WD   |      |     |     |     | B*15:183                        |          |          |           |
| B*15:190N                        | N                                        | WD                                  | WD    |     |     | WD   |      |     |     |     | B*15:190N                       |          |          |           |
| B*15:192                         | P                                        | o                                   | o     |     |     |      |      |     |     |     | B*15:192                        |          |          | WD        |
| B*15:204                         | P                                        | WD                                  | WD    |     | WD  |      |      |     |     |     | B*15:204                        |          |          |           |
| B*15:206                         | P                                        | o                                   | o     |     |     |      |      |     |     |     | B*15:206                        |          | WD       |           |
| B*15:207                         | P                                        | WD                                  | WD    |     |     | WD   |      |     |     |     | B*15:207                        |          | WD       |           |
| B*15:208                         | P                                        | WD                                  | WD    |     |     | WD   |      |     |     |     | B*15:208                        |          | WD       |           |
| B*15:211                         | P                                        | WD                                  | WD    |     |     | WD   |      |     |     |     | B*15:211                        |          |          |           |
| B*15:237                         | P                                        | WD                                  | WD    |     |     | WD   |      |     |     |     | B*15:237                        |          |          |           |
| B*15:239                         | P                                        | WD                                  | WD    |     |     | WD   |      |     |     |     | B*15:239                        |          | WD       |           |
| B*15:240                         | P                                        | I                                   | WD    |     | I   |      |      |     |     |     | B*15:240                        |          |          |           |
| B*15:248                         | P                                        | WD                                  | WD    |     |     | WD   |      |     |     |     | B*15:248                        |          |          |           |
| B*15:290                         | P                                        | I                                   | WD    |     | I   |      |      |     |     |     | B*15:290                        |          |          |           |
| B*15:319                         | P                                        | WD                                  | WD    |     | WD  |      |      |     |     |     | B*15:319                        |          |          |           |
| B*15:335                         | P                                        | WD                                  | WD    |     | WD  |      |      |     |     |     | B*15:335                        |          |          |           |
| B*18:01                          | P                                        | C                                   | C     | C   | C   | C    | C    | C   | C   | C   | B*18:01                         | C        | C        | C         |
| B*18:02                          | P                                        | C                                   | C     |     | C   | WD   | WD   |     |     | C   | B*18:02                         | C        | WD       | WD        |
| B*18:03                          | P                                        | C                                   | C     | C   | I   | C    | C    | C   | C   | C   | B*18:03                         | C        | C        | WD        |
| B*18:04                          | P                                        | C                                   | I     | WD  |     | I    | WD   | C   | C   | I   | B*18:04                         | WD       | C        |           |

Supplementary Table 3b. Comparison of HLA-B P group two-field assignments among CIWD catalogs <sup>a</sup>

|                                  |                                          | 3.0.0 CIWD                          |       |     |     |      |      |     |     |     | 2.0.0 CWD                       |          | EFI CWD  | China CWD |
|----------------------------------|------------------------------------------|-------------------------------------|-------|-----|-----|------|------|-----|-----|-----|---------------------------------|----------|----------|-----------|
|                                  |                                          | Category by Population <sup>b</sup> |       |     |     |      |      |     |     |     |                                 |          |          |           |
| HLA-B IPD-<br>HLA/IMGT<br>3.31.0 | Nomenclature<br>Designation <sup>a</sup> | Highest<br>Frequency                | Total | AFA | API | EURO | MENA | HIS | NAM | UNK | HLA-B IPD-<br>IMGT/HLA<br>3.9.0 | Category | Category | Category  |
| B*18:05                          | P                                        | C                                   | C     | WD  | I   | C    | C    | C   | C   | C   | B*18:05                         | WD       | C        |           |
| B*18:06                          | P                                        | I                                   | WD    |     |     | WD   | WD   | I   |     | WD  | B*18:06                         | WD       | WD       |           |
| B*18:07                          | P                                        | I                                   | I     |     |     | I    | WD   |     |     | WD  | B*18:07                         |          | WD       |           |
| B*18:08                          | P                                        | WD                                  | WD    |     |     | WD   |      |     |     | WD  | B*18:08                         | WD       | WD       |           |
| B*18:09                          | P                                        | WD                                  | WD    |     |     | WD   |      |     |     |     | B*18:09                         |          | WD       |           |
| B*18:10                          | P                                        | WD                                  | WD    |     |     |      |      |     |     |     | B*18:10                         |          |          |           |
| B*18:11                          | P                                        | WD                                  | WD    |     |     | WD   |      |     |     | WD  | B*18:11                         | WD       | WD       |           |
| B*18:12                          | P                                        | WD                                  | WD    |     |     | WD   |      |     |     | WD  | B*18:12                         | WD       | WD       |           |
| B*18:13                          | P                                        | I                                   | WD    |     |     | WD   |      |     |     | I   | B*18:13                         | WD       |          |           |
| B*18:14                          | P                                        | I                                   | I     |     |     | I    |      | WD  |     | WD  | B*18:14                         | WD       | WD       |           |
| B*18:15                          | P                                        | WD                                  | WD    |     |     | WD   |      |     |     | WD  | B*18:15                         |          | WD       |           |
| B*18:18                          | P                                        | I                                   | I     |     |     | I    |      |     |     | I   | B*18:18                         | WD       | C        |           |
| B*18:19                          | P                                        | WD                                  | WD    |     |     | WD   | WD   |     |     |     | B*18:19                         |          |          |           |
| B*18:20                          | P                                        | WD                                  | WD    |     |     | WD   |      | WD  |     | WD  | B*18:20                         | WD       | WD       |           |
| B*18:22                          | P                                        | WD                                  | WD    |     | WD  |      |      |     |     |     | B*18:22                         |          |          |           |
| B*18:25                          | P                                        | C                                   | WD    | C   | I   | WD   |      |     |     | I   | B*18:25                         | WD       |          |           |
| B*18:28                          | P                                        | WD                                  | WD    |     |     | WD   |      |     |     |     | B*18:28                         |          | WD       |           |
| B*18:30                          | P                                        | WD                                  | WD    |     |     | WD   |      |     |     |     | B*18:30                         |          |          |           |
| B*18:32                          | P                                        | WD                                  | WD    |     |     |      |      |     |     |     | B*18:32                         |          |          |           |
| B*18:33                          | P                                        | WD                                  | WD    |     |     | WD   |      |     |     |     | B*18:33                         | WD       | WD       |           |
| B*18:34                          | P                                        | WD                                  | WD    |     |     | WD   |      |     |     |     | B*18:34                         |          | WD       |           |
| B*18:36                          | P                                        | WD                                  | WD    |     |     | WD   |      |     |     |     | B*18:36                         |          |          |           |
| B*18:37                          | P                                        | WD                                  | WD    |     |     |      |      |     |     |     | B*18:37                         |          |          |           |
| B*18:40                          | P                                        | WD                                  | WD    |     |     | WD   |      |     |     |     | B*18:40                         |          |          |           |
| B*18:43                          | P                                        | WD                                  | WD    |     |     | WD   |      |     |     |     | B*18:43                         |          | WD       |           |
| B*18:44                          | P                                        | WD                                  | WD    |     |     | WD   |      |     |     |     | B*18:44                         |          |          |           |
| B*18:49                          | P                                        | WD                                  | WD    |     |     | WD   |      |     |     |     | B*18:49                         |          | WD       |           |
| B*18:60                          | P                                        | WD                                  | WD    |     |     | WD   |      |     |     |     | B*18:60                         |          |          |           |

Supplementary Table 3b. Comparison of HLA-B P group two-field assignments among CIWD catalogs <sup>a</sup>

|                                  |                                          | 3.0.0 CIWD                          |       |     |     |      |      |     |     |     | 2.0.0 CWD                       |          | EFI CWD  | China CWD |
|----------------------------------|------------------------------------------|-------------------------------------|-------|-----|-----|------|------|-----|-----|-----|---------------------------------|----------|----------|-----------|
|                                  |                                          | Category by Population <sup>b</sup> |       |     |     |      |      |     |     |     |                                 |          |          |           |
| HLA-B IPD-<br>HLA/IMGT<br>3.31.0 | Nomenclature<br>Designation <sup>a</sup> | Highest<br>Frequency                | Total | AFA | API | EURO | MENA | HIS | NAM | UNK | HLA-B IPD-<br>IMGT/HLA<br>3.9.0 | Category | Category | Category  |
| B*18:68                          | P                                        | WD                                  | WD    | WD  |     |      |      |     |     |     | B*18:68                         |          |          |           |
| B*18:69                          | P                                        | WD                                  | WD    |     |     |      | WD   |     |     |     | B*18:69                         |          |          |           |
| B*18:73                          | P                                        | WD                                  | WD    |     |     |      |      |     |     |     | B*18:73                         |          |          |           |
| B*18:95                          | P                                        | WD                                  | WD    |     |     |      |      |     |     |     | B*18:95                         |          |          |           |
| B*18:114                         | P                                        | WD                                  | WD    |     | WD  |      |      |     |     |     | B*18:114                        |          |          |           |
| B*27:01                          | P                                        | I                                   | I     |     |     | I    |      |     |     | WD  | B*27:01                         | WD       | WD       | WD        |
| B*27:02                          | P                                        | C                                   | C     | C   | C   | C    | C    | C   | C   | C   | B*27:02                         | C        | C        | WD        |
| B*27:03                          | P                                        | C                                   | C     | C   | I   | C    | C    | C   | C   | C   | B*27:03                         | C        | C        | WD        |
| B*27:04                          | P                                        | C                                   | C     | WD  | C   | I    | C    | I   | C   | C   | B*27:04                         | C        | WD       | C         |
| B*27:05                          | P                                        | C                                   | C     | C   | C   | C    | C    | C   | C   | C   | B*27:05                         | C        | C        | C         |
| B*27:06                          | P                                        | C                                   | C     | C   | C   | WD   | WD   | I   |     | C   | B*27:06                         | C        | WD       | WD        |
| B*27:07                          | P                                        | C                                   | C     | C   | C   | C    | C    | C   | C   | C   | B*27:07                         | C        | WD       | C         |
| B*27:08                          | P                                        | C                                   | I     | WD  |     | I    | WD   | C   | WD  | I   | B*27:08                         | C        |          |           |
| B*27:09                          | P                                        | C                                   | C     |     | I   | C    | WD   | I   |     | I   | B*27:09                         | WD       |          |           |
| B*27:10                          | P                                        | I                                   | I     | WD  |     | I    |      | I   |     | I   | B*27:10                         | WD       |          |           |
| B*27:12                          | P                                        | C                                   | I     | WD  |     | I    | C    | C   |     | C   | B*27:12                         | WD       |          |           |
| B*27:14                          | P                                        | C                                   | C     | WD  | I   | C    | WD   | I   |     | I   | B*27:14                         | WD       |          | WD        |
| B*27:15                          | P                                        | I                                   | WD    |     | I   |      |      |     |     |     | B*27:15                         | WD       |          | WD        |
| B*27:17                          | P                                        | WD                                  | WD    | WD  |     | WD   |      |     |     | WD  | B*27:17                         | WD       |          |           |
| B*27:18                          | P                                        | WD                                  | WD    |     | WD  |      |      |     |     |     | B*27:18                         |          |          |           |
| B*27:19                          | P                                        | WD                                  | WD    |     |     | WD   | WD   |     |     |     | B*27:19                         | WD       |          |           |
| B*27:20                          | P                                        | I                                   | WD    |     | I   |      |      |     |     |     | B*27:20                         | WD       |          |           |
| B*27:23                          | P                                        | WD                                  | WD    |     |     |      |      |     |     |     | B*27:23                         |          |          |           |
| B*27:24                          | P                                        | WD                                  | WD    |     | WD  |      |      |     |     |     | B*27:24                         | WD       |          | WD        |
| B*27:25                          | P                                        | WD                                  | WD    |     | WD  | WD   |      |     |     |     | B*27:25                         |          |          | WD        |
| B*27:26                          | P                                        | WD                                  | WD    | WD  |     |      |      |     |     |     | B*27:26                         |          |          |           |
| B*27:27                          | P                                        | I                                   | WD    |     |     |      |      | I   |     |     | B*27:27                         | WD       |          |           |
| B*27:30                          | P                                        | WD                                  | WD    |     |     | WD   |      |     |     |     | B*27:30                         |          |          |           |



Supplementary Table 3b. Comparison of HLA-B P group two-field assignments among CIWD catalogs <sup>a</sup>

|                                  |                                          | 3.0.0 CIWD                          |       |     |     |      |      |     |     |     | 2.0.0 CWD                       |          | EFI CWD  | China CWD |
|----------------------------------|------------------------------------------|-------------------------------------|-------|-----|-----|------|------|-----|-----|-----|---------------------------------|----------|----------|-----------|
|                                  |                                          | Category by Population <sup>b</sup> |       |     |     |      |      |     |     |     |                                 |          |          |           |
| HLA-B IPD-<br>HLA/IMGT<br>3.31.0 | Nomenclature<br>Designation <sup>a</sup> | Highest<br>Frequency                | Total | AFA | API | EURO | MENA | HIS | NAM | UNK | HLA-B IPD-<br>IMGT/HLA<br>3.9.0 | Category | Category | Category  |
| B*27:32                          | P                                        | WD                                  | WD    |     |     | WD   |      |     |     |     | B*27:32                         |          |          |           |
| B*27:34                          | P                                        | WD                                  | WD    |     |     | WD   |      |     |     |     | B*27:34                         |          |          |           |
| B*27:35                          | P                                        | WD                                  | WD    |     |     | WD   |      |     |     | WD  | B*27:35                         |          |          |           |
| B*27:36                          | P                                        | o                                   | o     |     |     |      |      |     |     |     | B*27:36                         |          |          | WD        |
| B*27:41                          | P                                        | WD                                  | WD    |     |     |      |      |     |     | WD  | B*27:41                         |          |          |           |
| B*27:42                          | P                                        | WD                                  | WD    |     |     | WD   |      |     |     | WD  | B*27:42                         |          |          |           |
| B*27:43                          | P                                        | WD                                  | WD    |     | WD  |      |      |     |     |     | B*27:43                         |          |          |           |
| B*27:46                          | P                                        | WD                                  | WD    |     |     |      |      |     |     |     | B*27:46                         |          |          |           |
| B*27:47                          | P                                        | WD                                  | WD    |     |     | WD   |      |     |     |     | B*27:47                         |          |          |           |
| B*27:48                          | P                                        | WD                                  | WD    |     |     | WD   |      |     |     |     | B*27:48                         |          |          |           |
| B*27:49                          | P                                        | WD                                  | WD    |     |     | WD   |      |     |     |     | B*27:49                         |          |          |           |
| B*27:51                          | P                                        | I                                   | WD    |     |     | I    |      |     |     |     | B*27:51                         |          |          |           |
| B*27:53                          | P                                        | WD                                  | WD    |     |     | WD   |      |     |     |     | B*27:53                         |          |          |           |
| B*27:56                          | P                                        | WD                                  | WD    |     |     | WD   |      |     |     |     | B*27:56                         |          |          |           |
| B*27:60                          | P                                        | WD                                  | WD    |     |     | WD   |      |     |     |     | B*27:60                         |          |          |           |
| B*27:61                          | P                                        | WD                                  | WD    |     | WD  |      |      |     |     |     | B*27:61                         |          |          | WD        |
| B*27:70                          | P                                        | WD                                  | WD    |     |     | WD   |      |     |     |     | B*27:70                         |          | WD       |           |
| B*27:73                          | P                                        | WD                                  | WD    |     |     | WD   |      |     |     |     | B*27:73                         |          | WD       |           |
| B*27:80                          | P                                        | WD                                  | WD    |     |     |      |      |     |     |     | B*27:80                         |          |          |           |
| B*27:82                          | P                                        | WD                                  | WD    |     |     | WD   |      |     |     |     | B*27:82                         |          |          |           |
| B*27:83                          | P                                        | WD                                  | WD    |     |     | WD   |      |     |     |     | B*27:83                         |          | WD       |           |
| B*27:84                          | P                                        | WD                                  | WD    |     |     |      |      |     |     |     | B*27:84                         |          |          |           |
| B*27:85                          | P                                        | WD                                  | WD    |     |     | WD   |      |     |     |     | B*27:85                         |          | WD       |           |
| B*27:90                          | P                                        | WD                                  | WD    |     |     | WD   |      |     |     |     | B*27:90                         |          |          |           |
| B*35:01                          | P                                        | C                                   | C     | C   | C   | C    | C    | C   | C   | C   | B*35:01                         | C        | C        | C         |
| B*35:02                          | P                                        | C                                   | C     | C   | C   | C    | C    | C   | C   | C   | B*35:02                         | C        | C        | C         |
| B*35:03                          | P                                        | C                                   | C     | C   | C   | C    | C    | C   | C   | C   | B*35:03                         | C        | C        | C         |
| B*35:04                          | P                                        | C                                   | C     | C   | WD  | I    |      | C   | C   | C   | B*35:04                         | C        | WD       | WD        |

Supplementary Table 3b. Comparison of HLA-B P group two-field assignments among CIWD catalogs <sup>a</sup>

|                                  |                                          | 3.0.0 CIWD                          |       |     |     |      |      |     |     |     | 2.0.0 CWD                       |          | EFI CWD  | China CWD |
|----------------------------------|------------------------------------------|-------------------------------------|-------|-----|-----|------|------|-----|-----|-----|---------------------------------|----------|----------|-----------|
|                                  |                                          | Category by Population <sup>b</sup> |       |     |     |      |      |     |     |     |                                 |          |          |           |
| HLA-B IPD-<br>HLA/IMGT<br>3.31.0 | Nomenclature<br>Designation <sup>a</sup> | Highest<br>Frequency                | Total | AFA | API | EURO | MENA | HIS | NAM | UNK | HLA-B IPD-<br>IMGT/HLA<br>3.9.0 | Category | Category | Category  |
| B*35:05                          | P                                        | C                                   | C     | C   | C   | I    | C    | C   | C   | C   | B*35:05                         | C        | WD       | C         |
| B*35:06                          | P                                        | C                                   | I     | WD  |     | WD   |      | C   | C   | C   | B*35:06                         | WD       |          |           |
| B*35:08                          | P                                        | C                                   | C     | C   | C   | C    | C    | C   | C   | C   | B*35:08                         | C        | C        | C         |
| B*35:09                          | P                                        | C                                   | C     |     | WD  | I    |      | C   | C   | C   | B*35:09                         | WD       |          |           |
| B*35:10                          | P                                        | C                                   | I     | WD  | WD  | WD   |      | C   | C   | I   | B*35:10                         | WD       |          |           |
| B*35:11                          | P                                        | C                                   | I     | WD  | WD  | WD   |      | C   | C   | I   | B*35:11                         | WD       |          | WD        |
| B*35:12                          | P                                        | C                                   | C     | C   | I   | I    | WD   | C   | C   | C   | B*35:12                         | C        | WD       |           |
| B*35:13                          | P                                        | I                                   | WD    |     | I   |      | WD   |     |     |     | B*35:13                         | WD       | WD       |           |
| B*35:14                          | P                                        | C                                   | C     | WD  | I   | I    | WD   | C   | C   | C   | B*35:14                         | C        | C        |           |
| B*35:15                          | P                                        | I                                   | WD    |     | I   | WD   |      | I   |     | WD  | B*35:15                         | WD       | WD       |           |
| B*35:16                          | P                                        | C                                   | I     | WD  | I   | WD   |      | C   | C   | C   | B*35:16                         | C        |          |           |
| B*35:17                          | P                                        | C                                   | C     | C   | I   | I    | WD   | C   | C   | C   | B*35:17                         | C        | WD       |           |
| B*35:18                          | P                                        | I                                   | WD    |     |     | WD   |      | I   |     | I   | B*35:18                         | WD       |          |           |
| B*35:19                          | P                                        | C                                   | C     |     |     | I    |      | C   | C   | C   | B*35:19                         | C        |          |           |
| B*35:20                          | P                                        | C                                   | C     | WD  | I   | I    |      | C   | C   | C   | B*35:20                         | C        | WD       |           |
| B*35:21                          | P                                        | C                                   | I     |     | WD  | WD   |      | C   | C   | C   | B*35:21                         | C        | WD       |           |
| B*35:22                          | P                                        | C                                   | I     | WD  |     | WD   |      | C   | C   | I   | B*35:22                         | WD       | WD       |           |
| B*35:23                          | P                                        | C                                   | I     |     | I   | WD   |      | C   | C   | I   | B*35:23                         | C        |          |           |
| B*35:24                          | P                                        | C                                   | I     |     |     | WD   |      | C   | C   | I   | B*35:24                         | WD       |          |           |
| B*35:25                          | P                                        | WD                                  | WD    |     |     | WD   |      |     |     |     | B*35:25                         | WD       |          |           |
| B*35:26                          | P                                        | I                                   | WD    |     |     |      |      | I   |     |     | B*35:26                         | WD       |          |           |
| B*35:27                          | P                                        | I                                   | WD    |     |     | I    |      |     |     | I   | B*35:27                         | WD       | WD       |           |
| B*35:28                          | P                                        | C                                   | I     |     |     | WD   |      | C   | C   | I   | B*35:28                         | WD       |          | WD        |
| B*35:29                          | P                                        | I                                   | I     |     |     | I    |      |     |     | WD  | B*35:29                         | WD       | WD       | WD        |
| B*35:30                          | P                                        | C                                   | I     |     | C   | WD   |      | C   | C   | I   | B*35:30                         | WD       | WD       | WD        |
| B*35:31                          | P                                        | C                                   | I     |     |     | WD   |      | C   | C   | I   | B*35:31                         | WD       | WD       |           |
| B*35:32                          | P                                        | WD                                  | WD    | WD  |     | WD   |      |     |     | WD  | B*35:32                         | WD       |          |           |
| B*35:33                          | P                                        | WD                                  | WD    |     |     | WD   |      |     |     |     | B*35:33                         |          |          |           |

Supplementary Table 3b. Comparison of HLA-B P group two-field assignments among CIWD catalogs <sup>a</sup>

|                                  |                                          | 3.0.0 CIWD                          |       |     |     |      |      |     |     |     | 2.0.0 CWD                       |          | EFI CWD  | China CWD |
|----------------------------------|------------------------------------------|-------------------------------------|-------|-----|-----|------|------|-----|-----|-----|---------------------------------|----------|----------|-----------|
|                                  |                                          | Category by Population <sup>b</sup> |       |     |     |      |      |     |     |     |                                 |          |          |           |
| HLA-B IPD-<br>HLA/IMGT<br>3.31.0 | Nomenclature<br>Designation <sup>a</sup> | Highest<br>Frequency                | Total | AFA | API | EURO | MENA | HIS | NAM | UNK | HLA-B IPD-<br>IMGT/HLA<br>3.9.0 | Category | Category | Category  |
| B*35:34                          | P                                        | C                                   | WD    |     |     | WD   |      | I   | C   | WD  | B*35:34                         | WD       |          |           |
| B*35:36                          | P                                        | I                                   | WD    |     |     | I    | WD   |     |     |     | B*35:36                         |          |          |           |
| B*35:37                          | P                                        | WD                                  | WD    |     | WD  | WD   |      |     |     |     | B*35:37                         | WD       |          | WD        |
| B*35:38                          | P                                        | WD                                  | WD    |     |     | WD   | WD   |     |     |     | B*35:38                         |          |          |           |
| B*35:41                          | P                                        | I                                   | I     | WD  |     | I    |      | I   | WD  | I   | B*35:41                         | C        |          |           |
| B*35:43                          | P                                        | C                                   | C     | C   | I   | I    | WD   | C   | C   | C   | B*35:43                         | C        |          |           |
| B*35:44                          | P                                        | I                                   | WD    |     |     |      |      | I   |     |     | B*35:44                         |          |          |           |
| B*35:45                          | P                                        | WD                                  | WD    |     |     | WD   |      |     |     |     | B*35:45                         |          |          |           |
| B*35:47                          | P                                        | I                                   | WD    |     |     |      |      | I   |     |     | B*35:47                         | WD       |          |           |
| B*35:48                          | P                                        | C                                   | WD    |     |     |      |      | I   | C   | WD  | B*35:48                         | WD       |          |           |
| B*35:49                          | P                                        | I                                   | WD    | WD  |     |      |      | I   |     | WD  | B*35:49                         | WD       |          |           |
| B*35:55                          | P                                        | I                                   | I     |     |     | I    |      | I   |     | I   | B*35:55                         | WD       |          |           |
| B*35:58                          | P                                        | WD                                  | WD    |     |     |      |      |     |     |     | B*35:58                         |          |          |           |
| B*35:59                          | P                                        | WD                                  | WD    | WD  |     |      |      | WD  |     | WD  | B*35:59                         |          |          |           |
| B*35:61                          | P                                        | WD                                  | WD    |     |     | WD   |      |     |     |     | B*35:61                         |          |          |           |
| B*35:64                          | P                                        | o                                   | o     |     |     |      |      |     |     |     | B*35:64                         |          |          | WD        |
| B*35:65Q                         | Q                                        | WD                                  | WD    |     |     | WD   |      |     |     |     | B*35:65Q                        |          | WD       |           |
| B*35:68                          | P                                        | I                                   | WD    |     |     | WD   |      | I   |     |     | B*35:68                         |          | WD       |           |
| B*35:72                          | P                                        | WD                                  | WD    |     | WD  |      |      |     |     |     | B*35:72                         |          |          |           |
| B*35:74                          | P                                        | WD                                  | WD    |     |     |      |      |     |     |     | B*35:74                         |          | WD       |           |
| B*35:77                          | P                                        | I                                   | WD    |     |     | WD   |      |     |     | I   | B*35:77                         | WD       | WD       |           |
| B*35:80                          | P                                        | WD                                  | WD    |     |     | WD   |      |     |     |     | B*35:80                         |          |          |           |
| B*35:81                          | P                                        | WD                                  | WD    |     |     | WD   |      |     |     |     | B*35:81                         |          | WD       |           |
| B*35:87                          | P                                        | WD                                  | WD    |     |     | WD   |      |     |     |     | B*35:87                         |          |          |           |
| B*35:90                          | P                                        | WD                                  | WD    |     |     |      |      |     |     |     | B*35:90                         |          |          |           |
| B*35:93                          | P                                        | WD                                  | WD    |     |     | WD   |      |     |     |     | B*35:93                         |          | WD       |           |
| B*35:95                          | P                                        | WD                                  | WD    |     |     | WD   |      |     |     |     | B*35:95                         |          | WD       |           |
| B*35:96                          | P                                        | WD                                  | WD    |     |     | WD   |      |     |     |     | B*35:96                         |          | WD       |           |

Supplementary Table 3b. Comparison of HLA-B P group two-field assignments among CIWD catalogs <sup>a</sup>

| HLA-B IPD-<br>HLA/IMGT<br>3.31.0 | Nomenclature<br>Designation <sup>a</sup> | 3.0.0 CIWD           |       |                                     |     |      |      |     |     |     | 2.0.0 CWD                       |          | EFI CWD  | China CWD |
|----------------------------------|------------------------------------------|----------------------|-------|-------------------------------------|-----|------|------|-----|-----|-----|---------------------------------|----------|----------|-----------|
|                                  |                                          | Highest<br>Frequency | Total | Category by Population <sup>b</sup> |     |      |      |     |     |     | HLA-B IPD-<br>IMGT/HLA<br>3.9.0 | Category | Category | Category  |
|                                  |                                          |                      |       | AFA                                 | API | EURO | MENA | HIS | NAM | UNK |                                 |          |          |           |
| B*35:100                         | P                                        | WD                   | WD    |                                     |     | WD   |      |     |     |     | B*35:100                        |          |          |           |
| B*35:101                         | P                                        | o                    | o     |                                     |     |      |      |     |     |     | B*35:101                        |          | WD       |           |
| B*35:103                         | P                                        | WD                   | WD    |                                     |     |      |      |     |     |     | B*35:103                        |          |          |           |
| B*35:104                         | P                                        | WD                   | WD    |                                     |     | WD   |      |     |     |     | B*35:104                        |          | WD       |           |
| B*35:106                         | P                                        | WD                   | WD    |                                     |     |      | WD   |     |     |     | B*35:106                        |          |          |           |
| B*35:108                         | P                                        | WD                   | WD    |                                     |     |      |      |     |     |     | B*35:108                        |          |          |           |
| B*35:109                         | P                                        | I                    | WD    |                                     | I   |      |      |     |     |     | B*35:109                        |          |          |           |
| B*35:110                         | P                                        | o                    | o     |                                     |     |      |      |     |     |     | B*35:110                        |          | WD       |           |
| B*35:112                         | P                                        | WD                   | WD    |                                     |     | WD   |      |     |     |     | B*35:112                        |          | WD       |           |
| B*35:115                         | P                                        | WD                   | WD    |                                     |     | WD   |      |     |     |     | B*35:115                        |          |          |           |
| B*35:116                         | P                                        | I                    | WD    |                                     |     |      |      | I   |     | WD  | B*35:116                        |          |          |           |
| B*35:121                         | P                                        | I                    | WD    |                                     |     |      |      | I   |     |     | B*35:121                        |          |          |           |
| B*35:123                         | P                                        | WD                   | WD    |                                     |     |      |      |     |     |     | B*35:123                        |          |          |           |
| B*35:128                         | P                                        | WD                   | WD    |                                     |     |      |      |     |     |     | B*35:128                        |          |          |           |
| B*35:132                         | P                                        | I                    | WD    |                                     | I   |      |      |     |     |     | B*35:132                        |          |          |           |
| B*35:136                         | P                                        | WD                   | WD    |                                     |     | WD   |      |     |     |     | B*35:136                        |          |          |           |
| B*35:139                         | P                                        | WD                   | WD    |                                     |     |      |      |     |     |     | B*35:139                        |          |          |           |
| B*35:157                         | P                                        | WD                   | WD    |                                     |     | WD   |      |     |     |     | B*35:157                        |          |          |           |
| B*35:158                         | P                                        | WD                   | WD    |                                     |     | WD   | WD   |     |     |     | B*35:158                        |          |          |           |
| B*35:163                         | P                                        | WD                   | WD    |                                     |     | WD   |      |     |     |     | B*35:163                        |          |          |           |
| B*35:165N                        | N                                        | WD                   | WD    |                                     |     |      |      |     |     |     | B*35:165N                       |          |          |           |
| B*35:167                         | P                                        | WD                   | WD    |                                     | WD  | WD   |      |     |     |     | B*35:167                        |          |          |           |
| B*35:174                         | P                                        | WD                   | WD    |                                     |     |      | WD   |     |     |     | B*35:174                        |          |          |           |
| B*35:178                         | P                                        | WD                   | WD    |                                     |     |      |      |     |     |     | B*35:178                        |          |          |           |
| B*35:183                         | P                                        | WD                   | WD    |                                     |     | WD   |      |     |     |     | B*35:183                        |          |          |           |
| B*35:189                         | P                                        | o                    | o     |                                     |     |      |      |     |     |     | B*35:189                        |          |          | WD        |
| B*35:191                         | P                                        | WD                   | WD    |                                     |     |      |      |     |     | WD  | B*35:191                        |          |          |           |
| B*35:193                         | P                                        | WD                   | WD    |                                     |     |      | WD   |     |     |     | B*35:193                        |          |          |           |

Supplementary Table 3b. Comparison of HLA-B P group two-field assignments among CIWD catalogs <sup>a</sup>

|                                  |                                          | 3.0.0 CIWD                          |       |     |     |      |      |     |     |     | 2.0.0 CWD                       |          | EFI CWD  | China CWD |
|----------------------------------|------------------------------------------|-------------------------------------|-------|-----|-----|------|------|-----|-----|-----|---------------------------------|----------|----------|-----------|
|                                  |                                          | Category by Population <sup>b</sup> |       |     |     |      |      |     |     |     |                                 |          |          |           |
| HLA-B IPD-<br>HLA/IMGT<br>3.31.0 | Nomenclature<br>Designation <sup>a</sup> | Highest<br>Frequency                | Total | AFA | API | EURO | MENA | HIS | NAM | UNK | HLA-B IPD-<br>IMGT/HLA<br>3.9.0 | Category | Category | Category  |
| B*35:204                         | P                                        | WD                                  | WD    |     |     | WD   |      |     |     |     | B*35:204                        |          |          |           |
| B*35:214                         | P                                        | WD                                  | WD    |     |     | WD   |      |     |     |     | B*35:214                        |          |          |           |
| B*35:225                         | P                                        | WD                                  | WD    |     |     |      |      |     |     |     | B*35:225                        |          |          |           |
| B*35:247                         | P                                        | WD                                  | WD    |     |     | WD   |      |     |     | WD  | B*35:247                        |          |          |           |
| B*35:259                         | P                                        | WD                                  | WD    |     |     |      |      |     |     |     | B*35:259                        |          |          |           |
| B*35:263                         | P                                        | WD                                  | WD    |     |     | WD   |      |     |     |     | B*35:263                        |          |          |           |
| B*35:278                         | P                                        | WD                                  | WD    |     |     | WD   |      |     |     |     | B*35:278                        |          |          |           |
| B*35:321                         | P                                        | WD                                  | WD    |     |     | WD   |      |     |     | WD  | B*35:321                        |          |          |           |
| B*37:01                          | P                                        | C                                   | C     | C   | C   | C    | C    | C   | C   | C   | B*37:01                         | C        | C        | C         |
| B*37:02                          | P                                        | C                                   | I     |     |     | I    | C    |     |     | C   | B*37:02                         | WD       |          | WD        |
| B*37:03N                         | N                                        | WD                                  | WD    |     |     | WD   |      |     |     |     | B*37:03N                        | WD       | WD       |           |
| B*37:04                          | P                                        | C                                   | I     |     | C   | I    | WD   |     |     | I   | B*37:04                         |          |          | WD        |
| B*37:05                          | P                                        | WD                                  | WD    |     | WD  |      |      |     |     |     | B*37:05                         |          |          |           |
| B*37:07                          | P                                        | WD                                  | WD    |     |     | WD   |      |     |     |     | B*37:07                         | WD       |          |           |
| B*37:09                          | P                                        | WD                                  | WD    |     |     |      |      |     |     |     | B*37:09                         |          |          |           |
| B*37:10                          | P                                        | WD                                  | WD    |     |     | WD   |      |     |     |     | B*37:10                         |          |          |           |
| B*37:16Q                         | Q                                        | WD                                  | WD    |     |     | WD   |      |     |     |     | B*37:16Q                        |          |          |           |
| B*37:17                          | P                                        | WD                                  | WD    |     |     | WD   |      |     |     |     | B*37:17                         |          |          |           |
| B*37:18                          | P                                        | WD                                  | WD    |     |     |      |      |     |     |     | B*37:18                         |          |          |           |
| B*37:21                          | P                                        | WD                                  | WD    |     |     | WD   |      |     |     |     | B*37:21                         |          |          |           |
| B*37:22                          | P                                        | WD                                  | WD    |     | WD  |      |      |     |     |     | B*37:22                         |          |          |           |
| B*37:27                          | P                                        | WD                                  | WD    |     |     |      |      |     |     |     | B*37:27                         |          |          |           |
| B*37:35                          | P                                        | WD                                  | WD    |     | WD  |      |      |     |     |     | B*37:35                         |          |          |           |
| B*37:42N                         | N                                        | WD                                  | WD    |     |     | WD   |      |     |     |     | B*37:42N                        |          |          |           |
| B*37:48                          | P                                        | WD                                  | WD    |     | WD  |      |      |     |     |     | B*37:48                         |          |          |           |
| B*38:01                          | P                                        | C                                   | C     | C   | C   | C    | C    | C   | C   | C   | B*38:01                         | C        | C        | C         |
| B*38:02                          | P                                        | C                                   | C     | C   | C   | I    | C    | C   | C   | C   | B*38:02                         | C        | WD       | C         |
| B*38:03                          | P                                        | I                                   | WD    |     |     | WD   |      | I   |     |     | B*38:03                         |          |          |           |

Supplementary Table 3b. Comparison of HLA-B P group two-field assignments among CIWD catalogs <sup>a</sup>

|                                  |                                          | 3.0.0 CIWD                          |       |     |     |      |      |     |     |     | 2.0.0 CWD                       |                | EFI CWD  | China CWD |
|----------------------------------|------------------------------------------|-------------------------------------|-------|-----|-----|------|------|-----|-----|-----|---------------------------------|----------------|----------|-----------|
|                                  |                                          | Category by Population <sup>b</sup> |       |     |     |      |      |     |     |     |                                 |                |          |           |
| HLA-B IPD-<br>HLA/IMGT<br>3.31.0 | Nomenclature<br>Designation <sup>a</sup> | Highest<br>Frequency                | Total | AFA | API | EURO | MENA | HIS | NAM | UNK | HLA-B IPD-<br>IMGT/HLA<br>3.9.0 | Category       | Category | Category  |
| B*38:06                          | P                                        | WD                                  | WD    |     |     |      |      |     |     |     | B*38:06                         | WD             |          |           |
| B*38:09                          | P                                        | C                                   | I     |     |     | I    |      | WD  |     | C   | B*38:09                         | WD             |          |           |
| B*38:12                          | P                                        | WD                                  | WD    |     |     | WD   | WD   |     |     |     | B*38:12                         |                |          |           |
| B*38:13                          | P                                        | WD                                  | WD    |     |     | WD   |      |     |     |     | B*38:13                         |                |          |           |
| B*38:14                          | P                                        | I                                   | WD    |     |     | WD   |      |     |     | I   | B*38:14                         |                |          |           |
| B*38:15                          | P                                        | WD                                  | WD    |     | WD  |      |      |     |     |     | B*38:15                         |                |          | WD        |
| B*38:17                          | P                                        | WD                                  | WD    |     |     |      |      |     |     |     | B*38:17                         |                |          |           |
| B*38:24                          | P                                        | I                                   | WD    |     |     | WD   |      |     |     | I   | B*38:24                         |                |          |           |
| B*38:27                          | P                                        | WD                                  | WD    |     |     |      |      |     |     | WD  | B*38:27                         |                |          |           |
| B*38:31                          | P                                        | WD                                  | WD    |     |     | WD   |      |     |     |     | B*38:31                         |                |          |           |
| B*38:32                          | P                                        | WD                                  | WD    |     |     | WD   |      |     |     |     | B*38:32                         |                |          |           |
| B*38:35                          | P                                        | I                                   | WD    |     | I   |      |      |     |     | WD  | B*38:35                         |                |          |           |
| B*38:37                          | P                                        | WD                                  | WD    |     |     | WD   |      |     |     |     | B*38:37                         |                |          |           |
| B*39:01                          | P                                        | C                                   | C     | C   | C   | C    | C    | C   | C   | C   | B*39:01                         | C              | C        | C         |
| B*39:02                          | P                                        | C                                   | C     | C   | I   | I    |      | C   | C   | C   | B*39:02                         | C <sup>d</sup> |          |           |
| B*39:03                          | P                                        | C                                   | C     | WD  |     | I    |      | C   | C   | C   | B*39:03                         | C              |          |           |
| B*39:04                          | P                                        | I                                   | WD    |     | I   |      |      |     |     | I   | B*39:04                         | WD             |          | WD        |
| B*39:05                          | P                                        | C                                   | C     | C   | C   | C    | C    | C   | C   | C   | B*39:05                         | C              | C        | C         |
| B*39:06                          | P                                        | C                                   | C     | C   | C   | C    | C    | C   | C   | C   | B*39:06                         | C <sup>d</sup> | C        | WD        |
| B*39:07                          | P                                        | I                                   | WD    |     |     |      |      | I   |     | WD  | B*39:07                         | WD             |          |           |
| B*39:08                          | P                                        | C                                   | C     | WD  | I   | WD   |      | C   | C   | C   | B*39:08                         | C              |          |           |
| B*39:09                          | P                                        | C                                   | C     | WD  | C   | I    |      | C   | C   | C   | B*39:09                         | WD             | WD       | WD        |
| B*39:10                          | P                                        | C                                   | C     | C   | I   | C    | C    | C   | C   | C   | B*39:10                         | C              | C        | WD        |
| B*39:11                          | P                                        | C                                   | I     | WD  | I   | WD   |      | C   | C   | C   | B*39:11                         | C              | WD       |           |
| B*39:12                          | P                                        | C                                   | I     |     |     | WD   |      | C   | C   | I   | B*39:12                         | C              | WD       |           |
| B*39:13                          | P                                        | C                                   | I     | WD  |     | WD   |      | C   | C   | C   | B*39:13                         | WD             | WD       |           |
| B*39:14                          | P                                        | C                                   | I     |     |     | WD   |      | C   | C   | I   | B*39:14                         | WD             |          |           |
| B*39:15                          | P                                        | C                                   | I     |     | C   | WD   | WD   |     |     | I   | B*39:15                         | C              | WD       | WD        |

Supplementary Table 3b. Comparison of HLA-B P group two-field assignments among CIWD catalogs <sup>a</sup>

|                                  |                                          | 3.0.0 CIWD                          |       |     |     |      |      |     |     |     | 2.0.0 CWD                       |          | EFI CWD  | China CWD |
|----------------------------------|------------------------------------------|-------------------------------------|-------|-----|-----|------|------|-----|-----|-----|---------------------------------|----------|----------|-----------|
|                                  |                                          | Category by Population <sup>b</sup> |       |     |     |      |      |     |     |     |                                 |          |          |           |
| HLA-B IPD-<br>HLA/IMGT<br>3.31.0 | Nomenclature<br>Designation <sup>a</sup> | Highest<br>Frequency                | Total | AFA | API | EURO | MENA | HIS | NAM | UNK | HLA-B IPD-<br>IMGT/HLA<br>3.9.0 | Category | Category | Category  |
| B*39:19                          | P                                        | WD                                  | WD    |     |     | WD   |      | WD  |     |     | B*39:19                         |          |          |           |
| B*39:20                          | P                                        | C                                   | I     | WD  |     | WD   |      | C   |     | I   | B*39:20                         | WD       |          |           |
| B*39:22                          | P                                        | I                                   | WD    |     |     |      |      | I   |     | WD  | B*39:22                         | WD       |          |           |
| B*39:24                          | P                                        | C                                   | C     | C   | I   | C    | C    | C   | C   | C   | B*39:24                         | C        | WD       | WD        |
| B*39:26                          | P                                        | WD                                  | WD    |     |     | WD   |      |     |     |     | B*39:26                         | WD       |          |           |
| B*39:29                          | P                                        | WD                                  | WD    |     |     | WD   |      |     |     |     | B*39:29                         |          |          |           |
| B*39:31                          | P                                        | C                                   | I     | WD  | I   | C    | C    | I   |     | I   | B*39:31                         | WD       |          | WD        |
| B*39:33                          | P                                        | WD                                  | WD    |     |     | WD   |      |     |     |     | B*39:33                         |          |          |           |
| B*39:34                          | P                                        | WD                                  | WD    |     |     |      |      |     |     |     | B*39:34                         |          |          |           |
| B*39:36                          | P                                        | o                                   | o     |     |     |      |      |     |     |     | B*39:36                         |          |          | WD        |
| B*39:37                          | P                                        | I                                   | WD    |     |     | WD   |      | I   |     | I   | B*39:37                         | WD       |          |           |
| B*39:38Q                         | Q                                        | o                                   | o     |     |     |      |      |     |     |     | B*39:38Q                        |          |          | WD        |
| B*39:39                          | P                                        | I                                   | WD    |     |     |      |      | I   |     |     | B*39:39                         | WD       |          |           |
| B*39:40N                         | N                                        | WD                                  | WD    |     |     | WD   |      |     |     |     | B*39:40N                        |          |          |           |
| B*39:43                          | P                                        | WD                                  | WD    |     | WD  |      |      |     |     |     | B*39:43                         |          |          |           |
| B*39:47                          | P                                        | WD                                  | WD    |     | WD  |      |      |     |     |     | B*39:47                         |          |          |           |
| B*39:53                          | P                                        | WD                                  | WD    |     |     | WD   |      |     |     |     | B*39:53                         |          |          |           |
| B*39:57                          | P                                        | WD                                  | WD    |     |     | WD   |      |     |     |     | B*39:57                         |          |          |           |
| B*39:58                          | P                                        | o                                   | o     |     |     |      |      |     |     |     | B*39:58                         |          |          | WD        |
| B*39:62                          | P                                        | WD                                  | WD    |     |     | WD   |      |     |     |     | B*39:62                         |          |          |           |
| B*39:64                          | P                                        | o                                   | o     |     |     |      |      |     |     |     | B*39:64                         |          | WD       |           |
| B*39:68                          | P                                        | WD                                  | WD    |     |     |      |      |     |     |     | B*39:68                         |          |          |           |
| B*39:75                          | P                                        | WD                                  | WD    |     |     |      |      | WD  |     |     | B*39:75                         |          |          |           |
| B*39:79                          | P                                        | WD                                  | WD    |     |     | WD   |      |     |     | WD  | B*39:79                         |          |          |           |
| B*39:93                          | P                                        | WD                                  | WD    |     |     | WD   |      |     |     |     | B*39:93                         |          |          |           |
| B*40:01                          | P                                        | C                                   | C     | C   | C   | C    | C    | C   | C   | C   | B*40:01                         | C        | C        | C         |
| B*40:02                          | P                                        | C                                   | C     | C   | C   | C    | C    | C   | C   | C   | B*40:02                         | C        | C        | C         |
| B*40:03                          | P                                        | C                                   | I     | WD  | C   | WD   |      | C   | C   | C   | B*40:03                         | WD       |          | C         |

Supplementary Table 3b. Comparison of HLA-B P group two-field assignments among CIWD catalogs <sup>a</sup>

|                                  |                                          | 3.0.0 CIWD                          |       |     |     |      |      |     |     |     | 2.0.0 CWD                       |          | EFI CWD  | China CWD |
|----------------------------------|------------------------------------------|-------------------------------------|-------|-----|-----|------|------|-----|-----|-----|---------------------------------|----------|----------|-----------|
|                                  |                                          | Category by Population <sup>b</sup> |       |     |     |      |      |     |     |     |                                 |          |          |           |
| HLA-B IPD-<br>HLA/IMGT<br>3.31.0 | Nomenclature<br>Designation <sup>a</sup> | Highest<br>Frequency                | Total | AFA | API | EURO | MENA | HIS | NAM | UNK | HLA-B IPD-<br>IMGT/HLA<br>3.9.0 | Category | Category | Category  |
| B*40:04                          | P                                        | C                                   | C     | C   | I   | I    |      | C   | C   | C   | B*40:04                         | WD       |          |           |
| B*40:05                          | P                                        | C                                   | C     | WD  | I   | I    |      | C   | C   | C   | B*40:05                         | C        |          |           |
| B*40:06                          | P                                        | C                                   | C     | C   | C   | C    | C    | C   | C   | C   | B*40:06                         | C        | C        | C         |
| B*40:07                          | P                                        | WD                                  | WD    |     |     | WD   |      |     |     |     | B*40:07                         | WD       | WD       |           |
| B*40:08                          | P                                        | C                                   | C     | WD  | I   | I    |      | C   | C   | C   | B*40:08                         | C        | WD       |           |
| B*40:09                          | P                                        | I                                   | WD    |     |     | WD   |      | I   |     | I   | B*40:09                         | WD       | WD       |           |
| B*40:10                          | P                                        | C                                   | I     |     | C   | WD   |      | WD  |     | C   | B*40:10                         | WD       | WD       | WD        |
| B*40:11                          | P                                        | C                                   | I     | WD  | WD  | WD   |      | C   | C   | C   | B*40:11                         | WD       | WD       | WD        |
| B*40:12                          | P                                        | C                                   | I     | C   |     | I    | C    | I   |     | I   | B*40:12                         | WD       | WD       |           |
| B*40:13                          | P                                        | C                                   | I     |     |     | I    |      | C   |     | C   | B*40:13                         | WD       |          |           |
| B*40:14                          | P                                        | WD                                  | WD    |     |     | WD   |      |     |     | WD  | B*40:14                         |          | WD       |           |
| B*40:16                          | P                                        | C                                   | I     | C   |     | WD   | WD   | C   | C   | I   | B*40:16                         | C        | WD       |           |
| B*40:18                          | P                                        | WD                                  | WD    |     |     | WD   |      |     |     |     | B*40:18                         |          | WD       |           |
| B*40:19                          | P                                        | WD                                  | WD    |     |     | WD   |      |     |     |     | B*40:19                         | WD       | WD       |           |
| B*40:20                          | P                                        | C                                   | I     |     |     | WD   |      | C   | C   | I   | B*40:20                         | WD       |          |           |
| B*40:21                          | P                                        | WD                                  | WD    |     |     |      |      |     |     |     | B*40:21                         |          |          |           |
| B*40:22N                         | N                                        | WD                                  | WD    |     |     |      |      |     |     |     | B*40:22N                        | WD       |          |           |
| B*40:23                          | P                                        | C                                   | I     |     | C   | WD   |      |     |     | I   | B*40:23                         | WD       | WD       |           |
| B*40:25                          | P                                        | o                                   | o     |     |     |      |      |     |     |     | B*40:25                         | WD       | WD       | WD        |
| B*40:26                          | P                                        | C                                   | I     |     | C   | WD   |      |     |     | WD  | B*40:26                         | WD       |          |           |
| B*40:27                          | P                                        | C                                   | I     | WD  | I   | WD   |      | C   | C   | C   | B*40:27                         | C        |          |           |
| B*40:30                          | P                                        | WD                                  | WD    |     |     | WD   |      |     |     |     | B*40:30                         | WD       |          |           |
| B*40:31                          | P                                        | WD                                  | WD    |     |     | WD   |      |     |     |     | B*40:31                         |          |          |           |
| B*40:32                          | P                                        | I                                   | I     |     |     | I    |      |     |     |     | B*40:32                         | WD       | WD       |           |
| B*40:35                          | P                                        | WD                                  | WD    |     |     |      |      |     |     |     | B*40:35                         |          |          |           |
| B*40:40                          | P                                        | I                                   | WD    |     | I   |      |      |     |     | WD  | B*40:40                         | WD       |          | WD        |
| B*40:42                          | P                                        | WD                                  | WD    |     |     | WD   |      |     |     | WD  | B*40:42                         |          | WD       |           |
| B*40:43                          | P                                        | WD                                  | WD    |     |     | WD   |      |     |     |     | B*40:43                         | WD       |          | WD        |



Supplementary Table 3b. Comparison of HLA-B P group two-field assignments among CIWD catalogs <sup>a</sup>

| HLA-B IPD-<br>HLA/IMGT<br>3.31.0 | Nomenclature<br>Designation <sup>a</sup> | 3.0.0 CIWD           |       |                                     |     |      |      |     |     |     | 2.0.0 CWD                       |          | EFI CWD  | China CWD |
|----------------------------------|------------------------------------------|----------------------|-------|-------------------------------------|-----|------|------|-----|-----|-----|---------------------------------|----------|----------|-----------|
|                                  |                                          | Highest<br>Frequency | Total | Category by Population <sup>b</sup> |     |      |      |     |     |     | HLA-B IPD-<br>IMGT/HLA<br>3.9.0 | Category | Category | Category  |
|                                  |                                          |                      |       | AFA                                 | API | EURO | MENA | HIS | NAM | UNK |                                 |          |          |           |
| B*40:44                          | P                                        | I                    | WD    |                                     | I   |      |      |     |     |     | B*40:44                         |          |          |           |
| B*40:47                          | P                                        | WD                   | WD    |                                     |     | WD   |      |     |     |     | B*40:47                         |          | WD       |           |
| B*40:48                          | P                                        | WD                   | WD    |                                     | WD  |      |      |     |     |     | B*40:48                         |          |          | WD        |
| B*40:49                          | P                                        | WD                   | WD    |                                     |     | WD   |      |     |     |     | B*40:49                         |          | WD       | WD        |
| B*40:50                          | P                                        | C                    | I     |                                     | C   | WD   | WD   |     |     | I   | B*40:50                         | WD       | WD       | WD        |
| B*40:52                          | P                                        | WD                   | WD    |                                     |     | WD   |      |     |     |     | B*40:52                         |          |          |           |
| B*40:53                          | P                                        | WD                   | WD    |                                     |     |      |      |     |     |     | B*40:53                         |          |          |           |
| B*40:61                          | P                                        | WD                   | WD    |                                     | WD  |      |      |     |     |     | B*40:61                         |          |          |           |
| B*40:63                          | P                                        | WD                   | WD    |                                     |     | WD   |      |     |     |     | B*40:63                         |          |          |           |
| B*40:64                          | P                                        | I                    | WD    |                                     |     | WD   |      | I   |     | I   | B*40:64                         | WD       | WD       |           |
| B*40:69                          | P                                        | o                    | o     |                                     |     |      |      |     |     |     | B*40:69                         |          |          | WD        |
| B*40:70                          | P                                        | o                    | o     |                                     |     |      |      |     |     |     | B*40:70                         |          |          | WD        |
| B*40:72                          | P                                        | WD                   | WD    |                                     |     | WD   |      |     |     |     | B*40:72                         |          | WD       |           |
| B*40:74                          | P                                        | WD                   | WD    |                                     |     |      |      |     |     |     | B*40:74                         |          |          |           |
| B*40:75                          | P                                        | o                    | o     |                                     |     |      |      |     |     |     | B*40:75                         |          |          | WD        |
| B*40:78                          | P                                        | WD                   | WD    |                                     | WD  |      | WD   |     |     |     | B*40:78                         |          |          | WD        |
| B*40:79                          | P                                        | WD                   | WD    |                                     |     | WD   |      |     |     |     | B*40:79                         |          |          |           |
| B*40:81                          | P                                        | o                    | o     |                                     |     |      |      |     |     |     | B*40:81                         |          |          | WD        |
| B*40:84                          | P                                        | WD                   | WD    |                                     |     |      |      |     |     |     | B*40:84                         |          |          | WD        |
| B*40:87                          | P                                        | WD                   | WD    |                                     |     | WD   |      |     |     |     | B*40:87                         |          |          |           |
| B*40:90                          | P                                        | C                    | WD    | WD                                  |     | WD   |      |     | C   | WD  | B*40:90                         | WD       |          |           |
| B*40:94                          | P                                        | WD                   | WD    |                                     |     | WD   |      |     |     |     | B*40:94                         | WD       | WD       |           |
| B*40:95                          | P                                        | I                    | WD    |                                     | I   |      |      |     |     |     | B*40:95                         |          |          |           |
| B*40:99                          | P                                        | WD                   | WD    |                                     |     |      |      |     |     |     | B*40:99                         |          |          |           |
| B*40:102                         | P                                        | WD                   | WD    |                                     |     | WD   | WD   |     |     |     | B*40:102                        |          | WD       |           |
| B*40:103                         | P                                        | WD                   | WD    |                                     |     |      | WD   |     |     |     | B*40:103                        |          |          |           |
| B*40:108                         | P                                        | WD                   | WD    |                                     |     | WD   |      |     |     |     | B*40:108                        |          | WD       |           |
| B*40:110                         | P                                        | WD                   | WD    |                                     | WD  |      |      |     |     |     | B*40:110                        |          |          |           |

Supplementary Table 3b. Comparison of HLA-B P group two-field assignments among CIWD catalogs <sup>a</sup>

| HLA-B IPD-<br>HLA/IMGT<br>3.31.0 | Nomenclature<br>Designation <sup>a</sup> | 3.0.0 CIWD           |       |                                     |     |      |      |     |     |     | 2.0.0 CWD                       |          | EFI CWD  | China CWD |
|----------------------------------|------------------------------------------|----------------------|-------|-------------------------------------|-----|------|------|-----|-----|-----|---------------------------------|----------|----------|-----------|
|                                  |                                          | Highest<br>Frequency | Total | Category by Population <sup>b</sup> |     |      |      |     |     |     | HLA-B IPD-<br>IMGT/HLA<br>3.9.0 | Category | Category | Category  |
|                                  |                                          |                      |       | AFA                                 | API | EURO | MENA | HIS | NAM | UNK |                                 |          |          |           |
| B*40:111                         | P                                        | WD                   | WD    |                                     |     |      |      |     | WD  |     | B*40:111                        |          |          |           |
| B*40:113                         | P                                        | WD                   | WD    |                                     |     | WD   |      |     |     |     | B*40:113                        |          |          |           |
| B*40:114                         | P                                        | WD                   | WD    |                                     |     | WD   |      |     |     |     | B*40:114                        | WD       |          |           |
| B*40:115                         | P                                        | I                    | WD    |                                     | I   |      |      |     |     |     | B*40:115                        |          |          |           |
| B*40:117                         | P                                        | WD                   | WD    |                                     |     |      |      |     |     |     | B*40:117                        |          |          |           |
| B*40:119                         | P                                        | WD                   | WD    |                                     |     |      |      |     |     |     | B*40:119                        |          |          |           |
| B*40:122                         | P                                        | o                    | o     |                                     |     |      |      |     |     |     | B*40:122                        |          |          | WD        |
| B*40:125                         | P                                        | o                    | o     |                                     |     |      |      |     |     |     | B*40:125                        |          |          | WD        |
| B*40:126                         | P                                        | WD                   | WD    |                                     |     |      |      |     |     |     | B*40:126                        |          |          |           |
| B*40:129                         | P                                        | WD                   | WD    |                                     |     |      |      | WD  |     |     | B*40:129                        | WD       |          |           |
| B*40:130                         | P                                        | WD                   | WD    |                                     | WD  | WD   |      |     |     |     | B*40:130                        |          |          |           |
| B*40:135                         | P                                        | WD                   | WD    |                                     |     |      |      |     |     |     | B*40:135                        |          |          |           |
| B*40:140                         | P                                        | o                    | o     |                                     |     |      |      |     |     |     | B*40:140                        |          |          | WD        |
| B*40:142N                        | N                                        | WD                   | WD    |                                     |     |      |      |     |     |     | B*40:142N                       |          |          |           |
| B*40:153                         | P                                        | o                    | o     |                                     |     |      |      |     |     |     | B*40:153                        |          |          | WD        |
| B*40:155N                        | N                                        | WD                   | WD    |                                     | WD  |      |      |     |     |     | B*40:155N                       |          |          |           |
| B*40:157                         | P                                        | WD                   | WD    |                                     |     |      |      |     |     |     | B*40:157                        |          |          |           |
| B*40:159                         | P                                        | WD                   | WD    |                                     | WD  |      |      |     |     |     | B*40:159                        |          |          |           |
| B*40:160                         | P                                        | WD                   | WD    |                                     | WD  | WD   |      |     |     |     | B*40:160                        |          |          |           |
| B*40:168                         | P                                        | WD                   | WD    |                                     |     |      |      |     |     |     | B*40:168                        |          |          |           |
| B*40:177                         | P                                        | WD                   | WD    |                                     |     |      |      |     |     |     | B*40:177                        |          |          |           |
| B*40:183                         | P                                        | I                    | WD    |                                     | I   |      |      |     |     |     | B*40:183                        |          |          |           |
| B*40:197                         | P                                        | WD                   | WD    |                                     |     | WD   |      |     |     |     | B*40:197                        |          | WD       |           |
| B*40:200                         | P                                        | WD                   | WD    |                                     |     | WD   |      |     |     |     | B*40:200                        |          |          |           |
| B*40:201                         | P                                        | WD                   | WD    |                                     |     | WD   |      |     |     |     | B*40:201                        |          |          |           |
| B*40:203                         | P                                        | WD                   | WD    |                                     |     | WD   |      |     |     |     | B*40:203                        |          |          |           |
| B*40:207                         | P                                        | o                    | o     |                                     |     |      |      |     |     |     | B*40:207                        |          |          | WD        |
| B*40:226                         | P                                        | WD                   | WD    |                                     |     |      |      | WD  |     |     | B*40:226                        |          |          |           |

Supplementary Table 3b. Comparison of HLA-B P group two-field assignments among CIWD catalogs <sup>a</sup>

| HLA-B IPD-<br>HLA/IMGT<br>3.31.0 | Nomenclature<br>Designation <sup>a</sup> | 3.0.0 CIWD           |       |                                     |     |      |      |     |     |     | 2.0.0 CWD                       |          | EFI CWD  | China CWD |
|----------------------------------|------------------------------------------|----------------------|-------|-------------------------------------|-----|------|------|-----|-----|-----|---------------------------------|----------|----------|-----------|
|                                  |                                          | Highest<br>Frequency | Total | Category by Population <sup>b</sup> |     |      |      |     |     |     | HLA-B IPD-<br>IMGT/HLA<br>3.9.0 | Category | Category | Category  |
|                                  |                                          |                      |       | AFA                                 | API | EURO | MENA | HIS | NAM | UNK |                                 |          |          |           |
| B*40:255                         | P                                        | o                    | o     |                                     |     |      |      |     |     |     | B*40:255                        |          |          | WD        |
| B*40:268                         | P                                        | o                    | o     |                                     |     |      |      |     |     |     | B*40:268                        |          |          | WD        |
| B*40:295                         | P                                        | I                    | WD    |                                     | I   |      |      |     |     |     | B*40:295                        |          |          |           |
| B*40:310                         | P                                        | WD                   | WD    |                                     | WD  |      |      |     |     |     | B*40:310                        |          |          |           |
| B*40:334                         | P                                        | I                    | WD    |                                     |     |      |      | I   |     | WD  | B*40:334                        |          |          |           |
| B*41:01                          | P                                        | C                    | C     | C                                   | C   | C    | C    | C   | C   | C   | B*41:01                         | C        | C        | C         |
| B*41:02                          | P                                        | C                    | C     | C                                   | C   | C    | C    | C   | C   | C   | B*41:02                         | C        | C        | WD        |
| B*41:03                          | P                                        | C                    | I     | C                                   |     | WD   |      | I   |     | I   | B*41:03                         | C        |          |           |
| B*41:05                          | P                                        | WD                   | WD    |                                     |     | WD   |      |     |     |     | B*41:05                         |          |          |           |
| B*41:06                          | P                                        | I                    | WD    |                                     |     | WD   |      | I   |     |     | B*41:06                         |          |          |           |
| B*41:07                          | P                                        | I                    | WD    |                                     |     |      |      | I   |     | WD  | B*41:07                         | WD       |          |           |
| B*41:09                          | P                                        | WD                   | WD    |                                     |     |      |      |     |     |     | B*41:09                         |          |          |           |
| B*41:10                          | P                                        | WD                   | WD    |                                     |     | WD   |      |     |     |     | B*41:10                         |          |          |           |
| B*41:11                          | P                                        | WD                   | WD    |                                     |     | WD   |      |     |     |     | B*41:11                         |          |          |           |
| B*41:14                          | P                                        | WD                   | WD    |                                     |     |      |      |     |     |     | B*41:14                         |          |          |           |
| B*41:16                          | P                                        | WD                   | WD    |                                     |     | WD   |      |     |     |     | B*41:16                         |          |          |           |
| B*41:18                          | P                                        | WD                   | WD    |                                     |     | WD   |      |     |     |     | B*41:18                         |          |          |           |
| B*41:19                          | P                                        | WD                   | WD    |                                     |     | WD   |      |     |     |     | B*41:19                         |          |          |           |
| B*42:01                          | P                                        | C                    | C     | C                                   | C   | C    | C    | C   | C   | C   | B*42:01                         | C        | C        | WD        |
| B*42:02                          | P                                        | C                    | C     | C                                   | I   | C    | C    | C   | C   | C   | B*42:02                         | C        | C        | WD        |
| B*42:05                          | P                                        | I                    | WD    |                                     |     | I    |      |     |     |     | B*42:05                         | WD       | WD       |           |
| B*42:07                          | P                                        | WD                   | WD    |                                     |     |      | WD   |     |     |     | B*42:07                         |          |          |           |
| B*42:10                          | P                                        | WD                   | WD    | WD                                  |     |      |      |     |     |     | B*42:10                         |          |          |           |
| B*42:18                          | P                                        | I                    | WD    |                                     |     | WD   |      | I   |     | WD  | B*42:18                         |          |          |           |
| B*44:02                          | P                                        | C                    | C     | C                                   | C   | C    | C    | C   | C   | C   | B*44:02                         | C        | C        | C         |
| B*44:03                          | P                                        | C                    | C     | C                                   | C   | C    | C    | C   | C   | C   | B*44:03                         | C        | C        | C         |
| B*44:04                          | P                                        | C                    | C     | C                                   | WD  | C    | WD   | C   | C   | C   | B*44:04                         | C        | WD       |           |
| B*44:05                          | P                                        | C                    | C     | C                                   | C   | C    | C    | C   | C   | C   | B*44:05                         | C        | C        | WD        |

Supplementary Table 3b. Comparison of HLA-B P group two-field assignments among CIWD catalogs <sup>a</sup>

|                                  |                                          | 3.0.0 CIWD                          |       |     |     |      |      |     |     |     | 2.0.0 CWD                       |          | EFI CWD  | China CWD |
|----------------------------------|------------------------------------------|-------------------------------------|-------|-----|-----|------|------|-----|-----|-----|---------------------------------|----------|----------|-----------|
|                                  |                                          | Category by Population <sup>b</sup> |       |     |     |      |      |     |     |     |                                 |          |          |           |
| HLA-B IPD-<br>HLA/IMGT<br>3.31.0 | Nomenclature<br>Designation <sup>a</sup> | Highest<br>Frequency                | Total | AFA | API | EURO | MENA | HIS | NAM | UNK | HLA-B IPD-<br>IMGT/HLA<br>3.9.0 | Category | Category | Category  |
| B*44:06                          | P                                        | I                                   | I     |     | I   | I    | WD   | I   |     | I   | B*44:06                         | WD       |          |           |
| B*44:07                          | P                                        | C                                   | WD    | C   |     |      |      |     |     | I   | B*44:07                         | WD       |          |           |
| B*44:08                          | P                                        | I                                   | I     | WD  |     | I    |      | WD  |     | I   | B*44:08                         | WD       |          |           |
| B*44:09                          | P                                        | I                                   | I     |     |     | I    |      |     |     | I   | B*44:09                         | WD       |          |           |
| B*44:10                          | P                                        | C                                   | I     | C   |     | WD   |      | C   | C   | I   | B*44:10                         | C        |          |           |
| B*44:12                          | P                                        | o                                   | o     |     |     |      |      |     |     |     | B*44:12                         | WD       |          |           |
| B*44:13                          | P                                        | WD                                  | WD    |     |     | WD   |      |     |     | WD  | B*44:13                         |          |          |           |
| B*44:15                          | P                                        | C                                   | WD    | C   |     | WD   |      |     |     | WD  | B*44:15                         | WD       |          |           |
| B*44:17                          | P                                        | I                                   | WD    |     |     | WD   | WD   |     |     | I   | B*44:17                         |          |          |           |
| B*44:18                          | P                                        | WD                                  | WD    | WD  |     |      |      |     |     |     | B*44:18                         | WD       |          |           |
| B*44:20                          | P                                        | WD                                  | WD    |     |     | WD   |      |     |     | WD  | B*44:20                         | WD       |          |           |
| B*44:21                          | P                                        | I                                   | WD    |     |     | I    | WD   | WD  |     | WD  | B*44:21                         | WD       |          |           |
| B*44:22                          | P                                        | WD                                  | WD    |     |     | WD   |      |     |     |     | B*44:22                         | WD       |          |           |
| B*44:23N                         | N                                        | WD                                  | WD    |     |     | WD   |      |     |     |     | B*44:23N                        | WD       |          |           |
| B*44:24                          | P                                        | WD                                  | WD    |     |     | WD   |      |     |     |     | B*44:24                         | WD       |          |           |
| B*44:25                          | P                                        | WD                                  | WD    |     |     | WD   |      |     |     |     | B*44:25                         | WD       |          |           |
| B*44:28                          | P                                        | WD                                  | WD    |     |     | WD   |      |     |     |     | B*44:28                         |          |          |           |
| B*44:29                          | P                                        | C                                   | I     |     | WD  | I    | C    | I   |     | I   | B*44:29                         | WD       |          | WD        |
| B*44:30                          | P                                        | I                                   | WD    |     |     |      |      | I   |     |     | B*44:30                         |          |          |           |
| B*44:31                          | P                                        | WD                                  | WD    |     |     |      | WD   |     |     |     | B*44:31                         |          |          |           |
| B*44:32                          | P                                        | WD                                  | WD    |     |     | WD   |      |     |     |     | B*44:32                         |          |          |           |
| B*44:34                          | P                                        | WD                                  | WD    |     |     | WD   |      |     |     |     | B*44:34                         |          |          |           |
| B*44:36                          | P                                        | WD                                  | WD    |     |     | WD   |      |     |     | WD  | B*44:36                         |          |          |           |
| B*44:37                          | P                                        | WD                                  | WD    |     | WD  | WD   |      |     |     |     | B*44:37                         |          |          |           |
| B*44:41                          | P                                        | WD                                  | WD    |     |     | WD   |      |     |     |     | B*44:41                         |          |          |           |
| B*44:43                          | P                                        | WD                                  | WD    |     |     | WD   |      |     |     |     | B*44:43                         |          |          |           |
| B*44:45                          | P                                        | WD                                  | WD    |     |     | WD   |      |     |     |     | B*44:45                         |          |          |           |
| B*44:48                          | P                                        | WD                                  | WD    |     |     | WD   |      |     |     |     | B*44:48                         |          |          |           |

Supplementary Table 3b. Comparison of HLA-B P group two-field assignments among CIWD catalogs <sup>a</sup>

|                                  |                                          | 3.0.0 CIWD                          |       |     |     |      |      |     |     |     | 2.0.0 CWD                       |          | EFI CWD  | China CWD |
|----------------------------------|------------------------------------------|-------------------------------------|-------|-----|-----|------|------|-----|-----|-----|---------------------------------|----------|----------|-----------|
|                                  |                                          | Category by Population <sup>b</sup> |       |     |     |      |      |     |     |     |                                 |          |          |           |
| HLA-B IPD-<br>HLA/IMGT<br>3.31.0 | Nomenclature<br>Designation <sup>a</sup> | Highest<br>Frequency                | Total | AFA | API | EURO | MENA | HIS | NAM | UNK | HLA-B IPD-<br>IMGT/HLA<br>3.9.0 | Category | Category | Category  |
| B*44:50                          | P                                        | WD                                  | WD    |     |     |      |      |     |     |     | B*44:50                         | WD       |          |           |
| B*44:60                          | P                                        | WD                                  | WD    |     |     |      |      |     |     |     | B*44:60                         |          |          |           |
| B*44:64                          | P                                        | WD                                  | WD    |     |     | WD   |      |     |     |     | B*44:64                         |          | WD       |           |
| B*44:67                          | P                                        | WD                                  | WD    |     |     | WD   |      |     |     |     | B*44:67                         |          | WD       |           |
| B*44:68                          | P                                        | WD                                  | WD    |     |     | WD   |      |     |     |     | B*44:68                         |          | WD       |           |
| B*44:73                          | P                                        | WD                                  | WD    |     |     | WD   |      |     |     |     | B*44:73                         |          |          |           |
| B*44:74                          | P                                        | WD                                  | WD    |     |     | WD   |      |     |     |     | B*44:74                         |          | WD       |           |
| B*44:76                          | P                                        | WD                                  | WD    |     |     | WD   |      |     |     |     | B*44:76                         |          | WD       |           |
| B*44:77                          | P                                        | WD                                  | WD    |     |     | WD   |      |     |     |     | B*44:77                         |          | WD       |           |
| B*44:79                          | P                                        | o                                   | o     |     |     |      |      |     |     |     | B*44:79                         |          | WD       |           |
| B*44:80                          | P                                        | WD                                  | WD    |     |     | WD   |      |     |     |     | B*44:80                         |          | WD       |           |
| B*44:83                          | P                                        | WD                                  | WD    |     |     |      |      |     |     |     | B*44:83                         |          |          |           |
| B*44:84                          | P                                        | WD                                  | WD    |     |     |      |      |     |     |     | B*44:84                         |          |          |           |
| B*44:86                          | P                                        | WD                                  | WD    |     |     | WD   |      |     |     |     | B*44:86                         |          | WD       |           |
| B*44:87                          | P                                        | I                                   | WD    |     | I   |      |      |     |     |     | B*44:87                         |          |          |           |
| B*44:88                          | P                                        | WD                                  | WD    |     |     | WD   |      |     |     |     | B*44:88                         |          | WD       |           |
| B*44:91                          | P                                        | WD                                  | WD    |     |     | WD   |      |     |     |     | B*44:91                         |          | WD       |           |
| B*44:92                          | P                                        | WD                                  | WD    |     |     | WD   |      |     |     |     | B*44:92                         |          | WD       |           |
| B*44:96                          | P                                        | WD                                  | WD    |     |     | WD   |      |     |     |     | B*44:96                         |          | WD       |           |
| B*44:98                          | P                                        | WD                                  | WD    |     |     |      |      |     |     | WD  | B*44:98                         |          |          |           |
| B*44:99                          | P                                        | WD                                  | WD    |     |     |      |      |     |     |     | B*44:99                         |          |          |           |
| B*44:104                         | P                                        | WD                                  | WD    |     |     | WD   |      |     |     |     | B*44:104                        |          |          |           |
| B*44:107                         | P                                        | WD                                  | WD    |     |     | WD   |      |     |     |     | B*44:107                        |          | WD       |           |
| B*44:111                         | P                                        | WD                                  | WD    |     |     | WD   |      |     |     |     | B*44:111                        |          |          |           |
| B*44:115                         | P                                        | WD                                  | WD    |     |     | WD   |      |     |     |     | B*44:115                        |          | WD       |           |
| B*44:116                         | P                                        | WD                                  | WD    |     |     | WD   |      |     |     |     | B*44:116                        |          |          |           |
| B*44:120                         | P                                        | WD                                  | WD    |     |     | WD   |      |     |     |     | B*44:120                        |          |          |           |
| B*44:122                         | P                                        | WD                                  | WD    |     |     | WD   |      |     |     |     | B*44:122                        |          | WD       |           |

Supplementary Table 3b. Comparison of HLA-B P group two-field assignments among CIWD catalogs <sup>a</sup>

|                                  |                                          | 3.0.0 CIWD                          |       |     |     |      |      |     |     |     | 2.0.0 CWD                       |          | EFI CWD  | China CWD |
|----------------------------------|------------------------------------------|-------------------------------------|-------|-----|-----|------|------|-----|-----|-----|---------------------------------|----------|----------|-----------|
|                                  |                                          | Category by Population <sup>b</sup> |       |     |     |      |      |     |     |     |                                 |          |          |           |
| HLA-B IPD-<br>HLA/IMGT<br>3.31.0 | Nomenclature<br>Designation <sup>a</sup> | Highest<br>Frequency                | Total | AFA | API | EURO | MENA | HIS | NAM | UNK | HLA-B IPD-<br>IMGT/HLA<br>3.9.0 | Category | Category | Category  |
| B*44:146                         | P                                        | WD                                  | WD    |     |     | WD   |      |     |     |     | B*44:146                        |          | WD       |           |
| B*44:166                         | P                                        | WD                                  | WD    |     |     | WD   |      |     |     |     | B*44:166                        |          |          |           |
| B*44:205                         | P                                        | WD                                  | WD    |     |     | WD   |      |     |     |     | B*44:205                        |          |          |           |
| B*45:01                          | P                                        | C                                   | C     | C   | C   | C    | C    | C   | C   | C   | B*45:01                         | C        | C        | C         |
| B*45:02                          | P                                        | WD                                  | WD    | WD  |     |      |      |     |     | WD  | B*45:02                         |          |          |           |
| B*46:01                          | P                                        | C                                   | C     | C   | C   | C    | C    | C   | C   | C   | B*46:01                         | C        | WD       | C         |
| B*46:02                          | P                                        | o                                   | o     |     |     |      |      |     |     |     | B*46:02                         | WD       |          |           |
| B*46:09                          | P                                        | o                                   | o     |     |     |      |      |     |     |     | B*46:09                         |          |          | WD        |
| B*46:18                          | P                                        | o                                   | o     |     |     |      |      |     |     |     | B*46:18                         |          |          | WD        |
| B*46:19                          | P                                        | o                                   | o     |     |     |      |      |     |     |     | B*46:19                         |          |          | WD        |
| B*46:22                          | P                                        | WD                                  | WD    |     | WD  |      |      |     |     |     | B*46:22                         |          |          |           |
| B*47:01                          | P                                        | C                                   | C     | C   | C   | C    | C    | C   | C   | C   | B*47:01                         | C        | C        | WD        |
| B*47:02                          | P                                        | I                                   | I     | WD  |     | I    |      |     |     | WD  | B*47:02                         | WD       | WD       |           |
| B*47:03                          | P                                        | C                                   | I     | C   |     | WD   | C    | WD  |     | I   | B*47:03                         | WD       | WD       |           |
| B*47:04                          | P                                        | WD                                  | WD    |     |     | WD   |      |     |     | WD  | B*47:04                         |          |          |           |
| B*47:05                          | P                                        | WD                                  | WD    |     |     |      |      |     |     |     | B*47:05                         |          |          |           |
| B*48:01                          | P                                        | C                                   | C     | C   | C   | C    | C    | C   | C   | C   | B*48:01                         | C        | WD       | C         |
| B*48:02                          | P                                        | C                                   | I     | C   | WD  | I    |      | C   | C   | C   | B*48:02                         | WD       | WD       |           |
| B*48:03                          | P                                        | C                                   | C     | WD  | C   | I    |      | C   | C   | C   | B*48:03                         | C        | WD       | C         |
| B*48:04                          | P                                        | C                                   | C     |     | C   | WD   |      |     |     | I   | B*48:04                         | WD       |          | WD        |
| B*48:05                          | P                                        | WD                                  | WD    | WD  |     |      | WD   |     |     |     | B*48:05                         | WD       |          |           |
| B*48:06                          | P                                        | WD                                  | WD    |     |     |      |      | WD  |     |     | B*48:06                         | WD       |          | WD        |
| B*48:07                          | P                                        | C                                   | WD    |     |     | WD   |      | WD  | C   | I   | B*48:07                         | WD       |          |           |
| B*48:12                          | P                                        | I                                   | WD    |     |     |      |      | I   |     |     | B*48:12                         | WD       |          |           |
| B*48:13                          | P                                        | I                                   | WD    |     |     |      |      | I   |     |     | B*48:13                         | WD       |          |           |
| B*48:24                          | P                                        | WD                                  | WD    |     | WD  |      |      |     |     |     | B*48:24                         |          |          |           |
| B*48:26                          | P                                        | WD                                  | WD    |     |     |      |      |     |     | WD  | B*48:26                         |          |          |           |
| B*48:29                          | P                                        | WD                                  | WD    |     |     |      |      |     |     |     | B*48:29                         |          |          |           |

Supplementary Table 3b. Comparison of HLA-B P group two-field assignments among CIWD catalogs <sup>a</sup>

|                                  |                                          | 3.0.0 CIWD                          |       |     |     |      |      |     |     |     | 2.0.0 CWD                       |          | EFI CWD  | China CWD |
|----------------------------------|------------------------------------------|-------------------------------------|-------|-----|-----|------|------|-----|-----|-----|---------------------------------|----------|----------|-----------|
|                                  |                                          | Category by Population <sup>b</sup> |       |     |     |      |      |     |     |     |                                 |          |          |           |
| HLA-B IPD-<br>HLA/IMGT<br>3.31.0 | Nomenclature<br>Designation <sup>a</sup> | Highest<br>Frequency                | Total | AFA | API | EURO | MENA | HIS | NAM | UNK | HLA-B IPD-<br>IMGT/HLA<br>3.9.0 | Category | Category | Category  |
| B*49:01                          | P                                        | C                                   | C     | C   | C   | C    | C    | C   | C   | C   | B*49:01                         | C        | C        | C         |
| B*49:04                          | P                                        | WD                                  | WD    |     |     | WD   |      |     |     |     | B*49:04                         |          |          |           |
| B*49:09                          | P                                        | WD                                  | WD    |     |     |      | WD   |     |     |     | B*49:09                         |          |          |           |
| B*49:18                          | P                                        | WD                                  | WD    |     |     |      |      | WD  |     | WD  | B*49:18                         |          |          |           |
| B*50:01                          | P                                        | C                                   | C     | C   | C   | C    | C    | C   | C   | C   | B*50:01                         | C        | C        | C         |
| B*50:02                          | P                                        | C                                   | C     | C   | I   | C    | C    | C   | C   | C   | B*50:02                         | C        | WD       |           |
| B*50:04                          | P                                        | I                                   | WD    |     | I   |      |      |     |     |     | B*50:04                         | WD       |          |           |
| B*50:08                          | P                                        | WD                                  | WD    |     |     | WD   |      |     |     |     | B*50:08                         |          |          |           |
| B*50:09                          | P                                        | WD                                  | WD    |     |     | WD   |      |     |     |     | B*50:09                         |          |          |           |
| B*50:12                          | P                                        | WD                                  | WD    |     |     | WD   |      |     |     |     | B*50:12                         |          |          |           |
| B*51:01                          | P                                        | C                                   | C     | C   | C   | C    | C    | C   | C   | C   | B*51:01                         | C        | C        | C         |
| B*51:11N                         | N                                        | WD                                  | WD    |     |     | WD   |      |     |     |     | B*51:11N                        | WD       | WD       |           |
| B*51:02                          | P                                        | C                                   | C     | C   | C   | I    | C    | C   | C   | C   | B*51:02                         | C        | C        | C         |
| B*51:03                          | P                                        | o                                   | o     |     |     |      |      |     |     |     | B*51:03                         | WD       | WD       |           |
| B*51:04                          | P                                        | I                                   | WD    | WD  |     | WD   | WD   | I   |     | I   | B*51:04                         | WD       | WD       | WD        |
| B*51:05                          | P                                        | C                                   | C     | WD  | I   | C    | C    | C   |     | C   | B*51:05                         | C        | C        | WD        |
| B*51:06                          | P                                        | C                                   | C     | WD  | C   | I    | WD   | I   | C   | C   | B*51:06                         | C        | WD       | WD        |
| B*51:07                          | P                                        | C                                   | C     | C   | C   | C    | C    | C   | C   | C   | B*51:07                         | C        | C        | WD        |
| B*51:08                          | P                                        | C                                   | C     | C   | C   | C    | C    | C   | C   | C   | B*51:08                         | C        | C        | WD        |
| B*51:09                          | P                                        | C                                   | C     | C   | I   | C    | C    | C   | C   | C   | B*51:09                         | C        | WD       | WD        |
| B*51:10                          | P                                        | I                                   | WD    |     | WD  | WD   |      | I   |     | WD  | B*51:10                         | WD       | WD       |           |
| B*51:13                          | P                                        | C                                   | I     |     |     | WD   |      | C   | C   | I   | B*51:13                         | WD       | WD       |           |
| B*51:14                          | P                                        | C                                   | I     | WD  |     | WD   |      | C   | C   | I   | B*51:14                         | WD       |          |           |
| B*51:17                          | P                                        | I                                   | WD    |     | I   |      |      |     |     |     | B*51:17                         | WD       |          |           |
| B*51:19                          | P                                        | C                                   | I     |     | C   | WD   |      | I   |     | I   | B*51:19                         | WD       | WD       |           |
| B*51:20                          | P                                        | WD                                  | WD    |     |     | WD   |      |     |     |     | B*51:20                         |          | WD       |           |
| B*51:21                          | P                                        | WD                                  | WD    |     |     | WD   |      |     |     |     | B*51:21                         | WD       | WD       | WD        |
| B*51:22                          | P                                        | C                                   | I     |     | WD  | I    |      | C   | C   | I   | B*51:22                         | WD       | WD       | WD        |

Supplementary Table 3b. Comparison of HLA-B P group two-field assignments among CIWD catalogs <sup>a</sup>

|                                  |                                          | 3.0.0 CIWD                          |       |     |     |      |      |     |     |     | 2.0.0 CWD                       |          | EFI CWD  | China CWD |
|----------------------------------|------------------------------------------|-------------------------------------|-------|-----|-----|------|------|-----|-----|-----|---------------------------------|----------|----------|-----------|
|                                  |                                          | Category by Population <sup>b</sup> |       |     |     |      |      |     |     |     |                                 |          |          |           |
| HLA-B IPD-<br>HLA/IMGT<br>3.31.0 | Nomenclature<br>Designation <sup>a</sup> | Highest<br>Frequency                | Total | AFA | API | EURO | MENA | HIS | NAM | UNK | HLA-B IPD-<br>IMGT/HLA<br>3.9.0 | Category | Category | Category  |
| B*51:23                          | P                                        | I                                   | WD    |     |     |      |      | I   |     | WD  | B*51:23                         | WD       |          |           |
| B*51:24                          | P                                        | WD                                  | WD    |     |     | WD   |      |     |     |     | B*51:24                         |          | WD       |           |
| B*51:26                          | P                                        | WD                                  | WD    |     |     | WD   |      |     |     |     | B*51:26                         |          | WD       |           |
| B*51:29                          | P                                        | WD                                  | WD    |     |     | WD   | WD   |     |     |     | B*51:29                         | WD       |          |           |
| B*51:31                          | P                                        | I                                   | WD    |     |     | WD   |      | I   |     | I   | B*51:31                         |          |          |           |
| B*51:33                          | P                                        | WD                                  | WD    |     |     |      |      |     |     |     | B*51:33                         |          |          |           |
| B*51:34                          | P                                        | I                                   | WD    |     | I   | WD   | WD   |     |     | WD  | B*51:34                         | WD       | WD       | WD        |
| B*51:36                          | P                                        | WD                                  | WD    |     | WD  |      |      |     |     |     | B*51:36                         |          |          | WD        |
| B*51:37                          | P                                        | WD                                  | WD    |     |     |      |      |     |     | WD  | B*51:37                         |          |          |           |
| B*51:38                          | P                                        | WD                                  | WD    |     |     | WD   |      |     |     |     | B*51:38                         |          | WD       |           |
| B*51:39                          | P                                        | WD                                  | WD    |     | WD  |      |      |     |     |     | B*51:39                         |          |          | WD        |
| B*51:40                          | P                                        | WD                                  | WD    |     |     | WD   |      |     |     |     | B*51:40                         | WD       |          |           |
| B*51:43                          | P                                        | I                                   | I     |     |     | WD   |      |     |     | I   | B*51:43                         | WD       | WD       |           |
| B*51:46                          | P                                        | WD                                  | WD    |     |     | WD   |      |     |     |     | B*51:46                         |          | WD       |           |
| B*51:49                          | P                                        | I                                   | WD    |     |     | WD   |      |     |     | I   | B*51:49                         | WD       | WD       |           |
| B*51:50                          | P                                        | I                                   | WD    |     |     | I    |      |     |     |     | B*51:50                         | WD       | WD       |           |
| B*51:55                          | P                                        | WD                                  | WD    |     |     | WD   |      |     |     |     | B*51:55                         | WD       | WD       |           |
| B*51:56                          | P                                        | WD                                  | WD    |     |     | WD   |      |     |     |     | B*51:56                         |          | WD       |           |
| B*51:59                          | P                                        | o                                   | o     |     |     |      |      |     |     |     | B*51:59                         |          |          | WD        |
| B*51:61                          | P                                        | WD                                  | WD    |     |     | WD   |      |     |     |     | B*51:61                         |          | WD       |           |
| B*51:64                          | P                                        | WD                                  | WD    | WD  |     |      |      |     |     |     | B*51:64                         |          |          |           |
| B*51:65                          | P                                        | I                                   | WD    |     |     | WD   | WD   | I   |     | WD  | B*51:65                         |          | WD       |           |
| B*51:67                          | P                                        | WD                                  | WD    |     |     | WD   |      |     |     |     | B*51:67                         |          |          |           |
| B*51:68                          | P                                        | WD                                  | WD    |     |     | WD   |      |     |     |     | B*51:68                         |          | WD       |           |
| B*51:69                          | P                                        | WD                                  | WD    |     |     | WD   | WD   |     |     |     | B*51:69                         |          |          |           |
| B*51:70                          | P                                        | WD                                  | WD    |     |     |      | WD   |     |     |     | B*51:70                         |          |          |           |
| B*51:71                          | P                                        | WD                                  | WD    |     |     | WD   |      |     |     |     | B*51:71                         |          |          |           |
| B*51:73                          | P                                        | WD                                  | WD    |     |     | WD   |      |     |     |     | B*51:73                         |          |          |           |



Supplementary Table 3b. Comparison of HLA-B P group two-field assignments among CIWD catalogs <sup>a</sup>

|                                  |                                          | 3.0.0 CIWD                          |       |     |     |      |      |     |     |     | 2.0.0 CWD                       |          | EFI CWD  | China CWD |
|----------------------------------|------------------------------------------|-------------------------------------|-------|-----|-----|------|------|-----|-----|-----|---------------------------------|----------|----------|-----------|
|                                  |                                          | Category by Population <sup>b</sup> |       |     |     |      |      |     |     |     |                                 |          |          |           |
| HLA-B IPD-<br>HLA/IMGT<br>3.31.0 | Nomenclature<br>Designation <sup>a</sup> | Highest<br>Frequency                | Total | AFA | API | EURO | MENA | HIS | NAM | UNK | HLA-B IPD-<br>IMGT/HLA<br>3.9.0 | Category | Category | Category  |
| B*51:74                          | P                                        | WD                                  | WD    |     |     |      | WD   |     |     |     | B*51:74                         |          |          |           |
| B*51:75                          | P                                        | I                                   | WD    |     |     | WD   |      | I   |     | WD  | B*51:75                         |          | WD       |           |
| B*51:76                          | P                                        | WD                                  | WD    |     |     | WD   |      |     |     |     | B*51:76                         |          | WD       |           |
| B*51:79                          | P                                        | WD                                  | WD    |     |     | WD   |      |     |     |     | B*51:79                         |          | WD       |           |
| B*51:82                          | P                                        | WD                                  | WD    |     |     | WD   |      |     |     |     | B*51:82                         |          | WD       |           |
| B*51:83                          | P                                        | WD                                  | WD    |     |     | WD   | WD   |     |     |     | B*51:83                         |          |          |           |
| B*51:87                          | P                                        | WD                                  | WD    |     |     | WD   |      |     |     |     | B*51:87                         |          |          |           |
| B*51:100                         | P                                        | WD                                  | WD    |     |     | WD   |      |     |     |     | B*51:100                        |          | WD       |           |
| B*51:105                         | P                                        | WD                                  | WD    |     |     | WD   |      |     |     |     | B*51:105                        |          | WD       |           |
| B*51:107                         | P                                        | WD                                  | WD    |     | WD  | WD   |      |     |     |     | B*51:107                        |          | WD       |           |
| B*51:109                         | P                                        | WD                                  | WD    |     | WD  |      |      |     |     |     | B*51:109                        |          |          |           |
| B*51:114                         | P                                        | WD                                  | WD    |     |     | WD   |      |     |     |     | B*51:114                        |          |          |           |
| B*51:116                         | P                                        | WD                                  | WD    |     |     | WD   |      |     |     |     | B*51:116                        |          |          |           |
| B*51:117                         | P                                        | WD                                  | WD    |     |     | WD   |      |     |     |     | B*51:117                        |          |          |           |
| B*51:122                         | P                                        | WD                                  | WD    |     |     | WD   |      |     |     |     | B*51:122                        |          | WD       |           |
| B*51:123                         | P                                        | WD                                  | WD    |     |     |      |      | WD  |     |     | B*51:123                        |          |          |           |
| B*51:127                         | P                                        | WD                                  | WD    |     |     |      |      |     |     |     | B*51:127                        |          |          |           |
| B*51:130                         | P                                        | o                                   | o     |     |     |      |      |     |     |     | B*51:130                        |          |          | WD        |
| B*51:134                         | P                                        | WD                                  | WD    |     |     | WD   |      |     |     |     | B*51:134                        |          |          |           |
| B*51:158                         | P                                        | I                                   | WD    |     | I   | WD   |      |     |     |     | B*51:158                        |          |          |           |
| B*51:177                         | P                                        | WD                                  | WD    |     |     | WD   |      |     |     |     | B*51:177                        |          |          |           |
| B*52:01                          | P                                        | C                                   | C     | C   | C   | C    | C    | C   | C   | C   | B*52:01                         | C        | C        | C         |
| B*52:02                          | P                                        | I                                   | WD    |     |     | WD   |      | I   |     |     | B*52:02                         | WD       |          |           |
| B*52:03                          | P                                        | I                                   | WD    |     |     |      |      | I   |     |     | B*52:03                         | WD       |          |           |
| B*52:04                          | P                                        | C                                   | I     | WD  | C   | WD   |      |     | C   | I   | B*52:04                         | WD       |          | WD        |
| B*52:06                          | P                                        | WD                                  | WD    |     |     | WD   |      |     |     |     | B*52:06                         |          |          |           |
| B*52:10                          | P                                        | WD                                  | WD    |     |     | WD   |      | WD  |     |     | B*52:10                         |          |          |           |
| B*52:11                          | P                                        | WD                                  | WD    |     |     | WD   |      |     |     |     | B*52:11                         |          |          | WD        |

Supplementary Table 3b. Comparison of HLA-B P group two-field assignments among CIWD catalogs <sup>a</sup>

|                                  |                                          | 3.0.0 CIWD                          |       |     |     |      |      |     |     |     | 2.0.0 CWD                       |          | EFI CWD  | China CWD |
|----------------------------------|------------------------------------------|-------------------------------------|-------|-----|-----|------|------|-----|-----|-----|---------------------------------|----------|----------|-----------|
|                                  |                                          | Category by Population <sup>b</sup> |       |     |     |      |      |     |     |     |                                 |          |          |           |
| HLA-B IPD-<br>HLA/IMGT<br>3.31.0 | Nomenclature<br>Designation <sup>a</sup> | Highest<br>Frequency                | Total | AFA | API | EURO | MENA | HIS | NAM | UNK | HLA-B IPD-<br>IMGT/HLA<br>3.9.0 | Category | Category | Category  |
| B*52:17                          | P                                        | WD                                  | WD    |     |     |      |      |     |     |     | B*52:17                         |          |          |           |
| B*52:20                          | P                                        | o                                   | o     |     |     |      |      |     |     |     | B*52:20                         |          |          | WD        |
| B*52:21                          | P                                        | WD                                  | WD    |     |     | WD   |      | WD  |     |     | B*52:21                         | WD       |          |           |
| B*52:25                          | P                                        | WD                                  | WD    |     |     | WD   |      |     |     |     | B*52:25                         |          |          |           |
| B*52:27                          | P                                        | WD                                  | WD    |     |     |      |      |     |     |     | B*52:27                         |          |          |           |
| B*52:37                          | P                                        | WD                                  | WD    |     |     |      |      |     |     |     | B*52:37                         |          |          |           |
| B*53:01                          | P                                        | C                                   | C     | C   | C   | C    | C    | C   | C   | C   | B*53:01                         | C        | C        | WD        |
| B*53:02                          | P                                        | o                                   | o     |     |     |      |      |     |     |     | B*53:02                         | WD       |          |           |
| B*53:04                          | P                                        | WD                                  | WD    |     |     | WD   |      |     |     |     | B*53:04                         | WD       |          |           |
| B*53:05                          | P                                        | I                                   | I     |     |     | I    | WD   |     |     | WD  | B*53:05                         | WD       |          |           |
| B*53:06                          | P                                        | WD                                  | WD    |     |     | WD   |      |     |     |     | B*53:06                         | WD       |          |           |
| B*53:09                          | P                                        | I                                   | WD    |     | I   |      |      |     |     |     | B*53:09                         |          |          |           |
| B*53:10                          | P                                        | WD                                  | WD    |     |     | WD   |      | WD  |     | WD  | B*53:10                         |          |          |           |
| B*53:15                          | P                                        | WD                                  | WD    | WD  |     |      |      |     |     |     | B*53:15                         |          |          |           |
| B*53:18                          | P                                        | WD                                  | WD    |     |     |      |      |     |     |     | B*53:18                         |          |          |           |
| B*53:20                          | P                                        | WD                                  | WD    | WD  |     |      |      |     |     |     | B*53:20                         |          |          |           |
| B*53:23                          | P                                        | WD                                  | WD    |     |     |      |      |     |     |     | B*53:23                         |          |          |           |
| B*53:24                          | P                                        | WD                                  | WD    |     |     | WD   |      |     |     |     | B*53:24                         |          |          |           |
| B*53:28                          | P                                        | WD                                  | WD    |     | WD  |      |      |     |     |     | B*53:28                         |          |          |           |
| B*53:31                          | P                                        | WD                                  | WD    |     |     | WD   |      |     |     |     | B*53:31                         |          |          |           |
| B*54:01                          | P                                        | C                                   | C     | WD  | C   | I    | C    | I   | C   | C   | B*54:01                         | C        |          | C         |
| B*54:16                          | P                                        | o                                   | o     |     |     |      |      |     |     |     | B*54:16                         |          |          | WD        |
| B*55:01                          | P                                        | C                                   | C     | C   | C   | C    | C    | C   | C   | C   | B*55:01                         | C        | C        | C         |
| B*55:02                          | P                                        | C                                   | C     | WD  | C   | I    | C    | I   | C   | C   | B*55:02                         | C        | WD       | C         |
| B*55:03                          | P                                        | I                                   | WD    |     | I   |      |      |     |     |     | B*55:03                         |          |          |           |
| B*55:04                          | P                                        | C                                   | I     |     | C   | WD   |      |     |     | I   | B*55:04                         | WD       |          | WD        |
| B*55:05                          | P                                        | WD                                  | WD    |     |     | WD   |      |     |     |     | B*55:05                         |          |          |           |
| B*55:07                          | P                                        | I                                   | WD    |     | I   | WD   | WD   |     |     |     | B*55:07                         | WD       | WD       | WD        |

Supplementary Table 3b. Comparison of HLA-B P group two-field assignments among CIWD catalogs <sup>a</sup>

|                                  |                                          | 3.0.0 CIWD                          |       |     |     |      |      |     |     |     | 2.0.0 CWD                       |          | EFI CWD  | China CWD |
|----------------------------------|------------------------------------------|-------------------------------------|-------|-----|-----|------|------|-----|-----|-----|---------------------------------|----------|----------|-----------|
|                                  |                                          | Category by Population <sup>b</sup> |       |     |     |      |      |     |     |     |                                 |          |          |           |
| HLA-B IPD-<br>HLA/IMGT<br>3.31.0 | Nomenclature<br>Designation <sup>a</sup> | Highest<br>Frequency                | Total | AFA | API | EURO | MENA | HIS | NAM | UNK | HLA-B IPD-<br>IMGT/HLA<br>3.9.0 | Category | Category | Category  |
| B*55:09                          | P                                        | WD                                  | WD    |     |     | WD   |      |     |     |     | B*55:09                         |          | WD       |           |
| B*55:11                          | P                                        | WD                                  | WD    |     |     | WD   |      | WD  |     |     | B*55:11                         |          | WD       |           |
| B*55:12                          | P                                        | I                                   | WD    |     | I   |      |      |     |     | WD  | B*55:12                         | WD       |          | WD        |
| B*55:14                          | P                                        | WD                                  | WD    |     |     | WD   |      |     |     |     | B*55:14                         |          | WD       |           |
| B*55:16                          | P                                        | o                                   | o     |     |     |      |      |     |     |     | B*55:16                         |          |          | WD        |
| B*55:17                          | P                                        | WD                                  | WD    |     |     | WD   |      |     |     |     | B*55:17                         |          | WD       |           |
| B*55:18                          | P                                        | WD                                  | WD    |     |     |      |      |     |     |     | B*55:18                         |          |          |           |
| B*55:20                          | P                                        | WD                                  | WD    |     |     | WD   |      |     |     |     | B*55:20                         |          | WD       |           |
| B*55:21                          | P                                        | WD                                  | WD    |     |     |      | WD   |     |     |     | B*55:21                         |          |          | WD        |
| B*55:23                          | P                                        | WD                                  | WD    |     |     |      |      |     |     |     | B*55:23                         | WD       |          |           |
| B*55:25                          | P                                        | WD                                  | WD    |     |     | WD   |      |     |     |     | B*55:25                         |          | WD       |           |
| B*55:26                          | P                                        | o                                   | o     |     |     |      |      |     |     |     | B*55:26                         |          |          | WD        |
| B*55:29                          | P                                        | WD                                  | WD    |     |     | WD   |      |     |     |     | B*55:29                         |          | WD       |           |
| B*55:30                          | P                                        | o                                   | o     |     |     |      |      |     |     |     | B*55:30                         |          |          | WD        |
| B*55:31                          | P                                        | WD                                  | WD    |     |     |      |      |     |     |     | B*55:31                         |          |          |           |
| B*55:33                          | P                                        | WD                                  | WD    |     |     | WD   |      |     |     |     | B*55:33                         |          | WD       |           |
| B*55:34                          | P                                        | o                                   | o     |     |     |      |      |     |     |     | B*55:34                         |          |          | WD        |
| B*55:36                          | P                                        | o                                   | o     |     |     |      |      |     |     |     | B*55:36                         |          | WD       |           |
| B*55:43                          | P                                        | o                                   | o     |     |     |      |      |     |     |     | B*55:43                         |          |          | WD        |
| B*55:45                          | P                                        | WD                                  | WD    |     |     | WD   |      |     |     |     | B*55:45                         |          | WD       |           |
| B*55:50                          | P                                        | o                                   | o     |     |     |      |      |     |     |     | B*55:50                         |          |          | WD        |
| B*55:78                          | P                                        | WD                                  | WD    |     | WD  |      |      |     |     |     | B*55:78                         |          |          |           |
| B*56:01                          | P                                        | C                                   | C     | C   | C   | C    | C    | C   | C   | C   | B*56:01                         | C        | C        | C         |
| B*56:02                          | P                                        | C                                   | I     |     | C   | WD   |      |     |     | C   | B*56:02                         | WD       | WD       |           |
| B*56:03                          | P                                        | C                                   | I     |     | C   | WD   |      |     |     | I   | B*56:03                         | WD       | WD       | WD        |
| B*56:04                          | P                                        | C                                   | I     |     | C   | WD   | WD   | WD  |     | C   | B*56:04                         | WD       | WD       | WD        |
| B*56:05                          | P                                        | I                                   | WD    |     | I   |      |      |     |     |     | B*56:05                         |          |          |           |
| B*56:07                          | P                                        | WD                                  | WD    |     | WD  |      |      |     |     |     | B*56:07                         |          |          |           |

Supplementary Table 3b. Comparison of HLA-B P group two-field assignments among CIWD catalogs <sup>a</sup>

|                                  |                                          | 3.0.0 CIWD                          |       |     |     |      |      |     |     |     | 2.0.0 CWD                       |          | EFI CWD  | China CWD |
|----------------------------------|------------------------------------------|-------------------------------------|-------|-----|-----|------|------|-----|-----|-----|---------------------------------|----------|----------|-----------|
|                                  |                                          | Category by Population <sup>b</sup> |       |     |     |      |      |     |     |     |                                 |          |          |           |
| HLA-B IPD-<br>HLA/IMGT<br>3.31.0 | Nomenclature<br>Designation <sup>a</sup> | Highest<br>Frequency                | Total | AFA | API | EURO | MENA | HIS | NAM | UNK | HLA-B IPD-<br>IMGT/HLA<br>3.9.0 | Category | Category | Category  |
| B*56:09                          | P                                        | o                                   | o     |     |     |      |      |     |     |     | B*56:09                         |          |          | WD        |
| B*56:10                          | P                                        | l                                   | WD    |     | l   |      |      |     |     |     | B*56:10                         | WD       |          | WD        |
| B*56:13                          | P                                        | WD                                  | WD    |     |     | WD   |      |     |     |     | B*56:13                         |          |          |           |
| B*56:14                          | P                                        | o                                   | o     |     |     |      |      |     |     |     | B*56:14                         |          |          | WD        |
| B*56:15                          | P                                        | WD                                  | WD    |     |     | WD   |      | WD  |     |     | B*56:15                         | WD       | WD       |           |
| B*56:16                          | P                                        | WD                                  | WD    |     |     | WD   |      |     |     |     | B*56:16                         | WD       | WD       |           |
| B*56:18                          | P                                        | o                                   | o     |     |     |      |      |     |     |     | B*56:18                         |          |          | WD        |
| B*56:21                          | P                                        | o                                   | o     |     |     |      |      |     |     |     | B*56:21                         |          |          | WD        |
| B*56:22                          | P                                        | l                                   | WD    |     | l   |      |      |     |     |     | B*56:22                         |          |          |           |
| B*56:25                          | P                                        | WD                                  | WD    |     |     | WD   |      |     |     |     | B*56:25                         |          | WD       |           |
| B*56:27                          | P                                        | WD                                  | WD    |     |     | WD   |      |     |     |     | B*56:27                         |          | WD       | WD        |
| B*56:33                          | P                                        | WD                                  | WD    |     |     | WD   |      |     |     |     | B*56:33                         |          |          |           |
| B*57:01                          | P                                        | C                                   | C     | C   | C   | C    | C    | C   | C   | C   | B*57:01                         | C        | C        | C         |
| B*57:02                          | P                                        | C                                   | C     | C   | l   | C    | C    | C   | C   | C   | B*57:02                         | C        | C        | WD        |
| B*57:03                          | P                                        | C                                   | C     | C   | C   | C    | C    | C   | C   | C   | B*57:03                         | C        | C        | WD        |
| B*57:04                          | P                                        | C                                   | l     | C   |     | WD   |      | l   | WD  | C   | B*57:04                         | WD       | WD       |           |
| B*57:05                          | P                                        | WD                                  | WD    | WD  |     |      |      |     |     |     | B*57:05                         | WD       |          |           |
| B*57:08                          | P                                        | o                                   | o     |     |     |      |      |     |     |     | B*57:08                         |          | WD       |           |
| B*57:09                          | P                                        | WD                                  | WD    | WD  |     |      |      |     |     |     | B*57:09                         |          |          |           |
| B*57:11                          | P                                        | WD                                  | WD    |     |     |      |      |     |     |     | B*57:11                         |          |          |           |
| B*57:13                          | P                                        | o                                   | o     |     |     |      |      |     |     |     | B*57:13                         |          | WD       |           |
| B*57:14                          | P                                        | WD                                  | WD    |     |     | WD   |      |     |     |     | B*57:14                         |          | WD       |           |
| B*57:15                          | P                                        | WD                                  | WD    |     |     | WD   |      |     |     |     | B*57:15                         |          | WD       |           |
| B*57:21                          | P                                        | WD                                  | WD    |     |     | WD   |      |     |     |     | B*57:21                         |          | WD       |           |
| B*57:22                          | P                                        | WD                                  | WD    |     | WD  |      |      |     |     |     | B*57:22                         |          |          |           |
| B*57:23                          | P                                        | WD                                  | WD    |     |     | WD   |      |     |     |     | B*57:23                         |          | WD       |           |
| B*57:24                          | P                                        | WD                                  | WD    |     |     | WD   |      |     |     |     | B*57:24                         |          | WD       |           |
| B*57:26                          | P                                        | WD                                  | WD    |     |     | WD   |      |     |     |     | B*57:26                         |          | WD       |           |

Supplementary Table 3b. Comparison of HLA-B P group two-field assignments among CIWD catalogs <sup>a</sup>

|                                  |                                          | 3.0.0 CIWD                          |       |     |     |      |      |     |     |     | 2.0.0 CWD                       |          | EFI CWD  | China CWD |
|----------------------------------|------------------------------------------|-------------------------------------|-------|-----|-----|------|------|-----|-----|-----|---------------------------------|----------|----------|-----------|
|                                  |                                          | Category by Population <sup>b</sup> |       |     |     |      |      |     |     |     |                                 |          |          |           |
| HLA-B IPD-<br>HLA/IMGT<br>3.31.0 | Nomenclature<br>Designation <sup>a</sup> | Highest<br>Frequency                | Total | AFA | API | EURO | MENA | HIS | NAM | UNK | HLA-B IPD-<br>IMGT/HLA<br>3.9.0 | Category | Category | Category  |
| B*57:32                          | P                                        | WD                                  | WD    |     |     | WD   |      |     |     |     | B*57:32                         |          | WD       |           |
| B*57:34                          | P                                        | WD                                  | WD    |     |     | WD   |      |     |     |     | B*57:34                         |          |          |           |
| B*57:40                          | P                                        | WD                                  | WD    |     |     | WD   |      |     |     |     | B*57:40                         |          | WD       |           |
| B*57:44                          | P                                        | WD                                  | WD    |     |     | WD   |      |     |     |     | B*57:44                         |          |          |           |
| B*57:48                          | P                                        | WD                                  | WD    |     |     | WD   |      |     |     |     | B*57:48                         |          |          |           |
| B*57:58                          | P                                        | WD                                  | WD    |     |     |      |      |     |     |     | B*57:58                         |          |          |           |
| B*57:61                          | P                                        | I                                   | WD    |     | I   |      |      |     |     |     | B*57:61                         |          |          |           |
| B*58:01                          | P                                        | C                                   | C     | C   | C   | C    | C    | C   | C   | C   | B*58:01                         | C        | C        | C         |
| B*58:02                          | P                                        | C                                   | C     | C   | I   | I    | C    | C   | C   | C   | B*58:02                         | C        | WD       |           |
| B*58:04                          | P                                        | WD                                  | WD    | WD  |     |      |      |     |     |     | B*58:04                         | WD       |          |           |
| B*58:05                          | P                                        | WD                                  | WD    |     |     | WD   |      |     |     |     | B*58:05                         |          |          |           |
| B*58:06                          | P                                        | WD                                  | WD    |     |     |      |      |     |     |     | B*58:06                         | WD       |          |           |
| B*58:08                          | P                                        | WD                                  | WD    |     | WD  |      |      |     |     |     | B*58:08                         |          |          |           |
| B*58:12                          | P                                        | o                                   | o     |     |     |      |      |     |     |     | B*58:12                         |          |          | WD        |
| B*58:16                          | P                                        | WD                                  | WD    |     |     | WD   |      |     |     |     | B*58:16                         |          |          |           |
| B*58:18                          | P                                        | I                                   | WD    |     | I   |      |      |     |     |     | B*58:18                         |          |          |           |
| B*58:23                          | P                                        | WD                                  | WD    |     |     | WD   |      |     |     |     | B*58:23                         |          |          |           |
| B*58:28                          | P                                        | WD                                  | WD    |     | WD  |      |      |     |     |     | B*58:28                         |          |          |           |
| B*58:37                          | P                                        | WD                                  | WD    |     |     | WD   |      |     |     |     | B*58:37                         |          |          |           |
| B*58:62                          | P                                        | WD                                  | WD    |     | WD  |      |      |     |     |     | B*58:62                         |          |          |           |
| B*59:01                          | P                                        | C                                   | I     |     | C   | WD   |      | I   |     | C   | B*59:01                         | C        |          | WD        |
| B*67:01                          | P                                        | C                                   | C     | WD  | C   | I    | WD   | C   | WD  | C   | B*67:01                         | C        | WD       | C         |
| B*67:02                          | P                                        | WD                                  | WD    |     |     |      |      |     |     |     | B*67:02                         | WD       |          |           |
| B*67:03                          | P                                        | o                                   | o     |     |     |      |      |     |     |     | B*67:03                         |          |          | WD        |
| B*73:01                          | P                                        | C                                   | C     | C   | C   | C    | C    | C   | C   | C   | B*73:01                         | C        | C        | WD        |
| B*78:01                          | P                                        | C                                   | C     | C   | I   | I    | C    | C   | C   | C   | B*78:01                         | C        | C        | WD        |
| B*78:02                          | P                                        | I                                   | I     |     |     | I    |      | WD  |     | I   | B*78:02                         | WD       | WD       | WD        |
| B*78:04                          | P                                        | I                                   | WD    |     |     |      |      | I   |     | WD  | B*78:04                         | WD       |          |           |

**Supplementary Table 3b. Comparison of HLA-B P group two-field assignments among CIWD catalogs <sup>a</sup>**

|                                  |                                          | 3.0.0 CIWD                          |       |     |     |      |      |     |     |     | 2.0.0 CWD                       |          | EFI CWD  | China CWD |
|----------------------------------|------------------------------------------|-------------------------------------|-------|-----|-----|------|------|-----|-----|-----|---------------------------------|----------|----------|-----------|
|                                  |                                          | Category by Population <sup>b</sup> |       |     |     |      |      |     |     |     |                                 |          |          |           |
| HLA-B IPD-<br>HLA/IMGT<br>3.31.0 | Nomenclature<br>Designation <sup>a</sup> | Highest<br>Frequency                | Total | AFA | API | EURO | MENA | HIS | NAM | UNK | HLA-B IPD-<br>IMGT/HLA<br>3.9.0 | Category | Category | Category  |
| B*81:01                          | P                                        | C                                   | C     | C   | C   | I    | C    | C   | C   | C   | B*81:01                         | C        | WD       | WD        |
| B*81:05                          | P                                        | WD                                  | WD    | WD  |     |      |      |     |     |     | B*81:05                         |          |          |           |
| B*82:01                          | P                                        | C                                   | I     | C   |     | WD   |      | C   | C   | C   | B*82:01                         | C        | WD       |           |
| B*82:02                          | P                                        | C                                   | I     | C   |     | WD   | C    | WD  |     | I   | B*82:02                         | WD       | WD       |           |
| B*83:01                          | P                                        | WD                                  | WD    |     |     | WD   |      |     |     |     | B*83:01                         |          |          |           |

C, common; I, intermediate; WD, well-documented

<sup>a</sup> Alleles observed at least five times in any population group in the current dataset are included in this table. The exception are alleles that were observed in previous catalogs but that are not present or are observed less than five times. Note that this two-field designation is the equivalent of a "P" assignment so that alleles within a G group that encode proteins that differ outside of the antigen recognition domain are not listed separately (e.g., B\*81:02 is within the B\*81:01P group assignment and is not listed in this table even though it was categorized as well-documented in 2.0.0 CWD). The table does not list all alleles from IPD-IMGT/HLA version 3.31.0.

<sup>b</sup> Population groups include: AFA (African/African American), API (Asian/Pacific Islander), EURO (European/European descent), MENA (Middle East/North Coast of Africa), HIS (Hispanic), NAM (Native American) and UNK (unknown, multiple ancestries or other). Total is the overall population i.e., all groups combined. Highest frequency is the highest CIWD designation among all the individual groups.

<sup>c</sup> Not-CIWD, o.

<sup>d</sup> CWD 2.0.0 lists two alleles, B\*39:06:01 (WD) and B\*39:06:02 (common). The category reported is the most frequent listed.

<sup>e</sup> Any non-expressed alleles which are excluded from the P group are listed. For example, B\*15:01:01:02N (sometimes listed by registries as B\*15:01N) is within the B\*15:01:01G group but is listed separately because it is not expressed.

Supplementary Table 3c. Comparison of HLA-C P group two-field assignments among CIWD catalogs <sup>a</sup>

|                                  |                                          | 3.0.0 CIWD                          |       |     |     |      |      |     |     |     | 2.0.0 CWD                       |          | EFI CWD  | China CWD |
|----------------------------------|------------------------------------------|-------------------------------------|-------|-----|-----|------|------|-----|-----|-----|---------------------------------|----------|----------|-----------|
|                                  |                                          | Category by Population <sup>b</sup> |       |     |     |      |      |     |     |     |                                 |          |          |           |
| HLA-C IPD-<br>HLA/IMGT<br>3.31.0 | Nomenclature<br>Designation <sup>a</sup> | Highest<br>Frequency                | Total | AFA | API | EURO | MENA | HIS | NAM | UNK | HLA-C IPD-<br>IMGT/HLA<br>3.9.0 | Category | Category | Category  |
| C*01:02                          | P                                        | C                                   | C     | C   | C   | C    | C    | C   | C   | C   | C*01:02                         | C        | C        | C         |
| C*01:03                          | P                                        | C                                   | I     |     | C   | WD   | C    |     |     | I   | C*01:03                         | WD       | WD       | C         |
| C*01:04                          | P                                        | WD                                  | WD    |     | WD  |      |      |     |     |     | C*01:04                         |          |          |           |
| C*01:06                          | P                                        | I                                   | WD    |     | I   | WD   |      |     |     | WD  | C*01:06                         | WD       |          | WD        |
| C*01:07                          | P                                        | I                                   | I     |     |     | I    |      |     |     | WD  | C*01:07                         | WD       | WD       |           |
| C*01:08                          | P                                        | C                                   | I     |     | C   |      |      |     |     | WD  | C*01:08                         | WD       |          | WD        |
| C*01:10                          | P                                        | I                                   | WD    |     |     | WD   |      | I   |     | WD  | C*01:10                         | WD       |          | WD        |
| C*01:12                          | P                                        | WD                                  | WD    |     |     | WD   |      |     |     |     | C*01:12                         |          |          |           |
| C*01:13                          | P                                        | WD                                  | WD    |     |     | WD   |      |     |     |     | C*01:13                         |          |          |           |
| C*01:14                          | P                                        | WD                                  | WD    |     |     |      |      |     |     |     | C*01:14                         |          |          |           |
| C*01:17                          | P                                        | C                                   | I     |     | C   | WD   | WD   |     |     |     | C*01:17                         | WD       | WD       | WD        |
| C*01:22                          | P                                        | I                                   | WD    |     |     | WD   |      | I   |     | WD  | C*01:22                         |          | WD       | WD        |
| C*01:27                          | P                                        | WD                                  | WD    |     |     | WD   |      |     |     | WD  | C*01:27                         | WD       |          |           |
| C*01:30                          | P                                        | WD                                  | WD    |     |     |      |      |     |     |     | C*01:30                         |          |          | WD        |
| C*01:32                          | P                                        | I                                   | I     |     |     | I    |      |     |     | WD  | C*01:32                         |          | WD       |           |
| C*01:33                          | P                                        | WD                                  | WD    |     |     |      |      |     |     |     | C*01:33                         |          | WD       |           |
| C*01:45                          | P                                        | WD                                  | WD    |     |     | WD   |      |     |     |     | C*01:45                         |          | WD       |           |
| C*01:50                          | P                                        | o <sup>c</sup>                      | o     |     |     |      |      |     |     |     | C*01:50                         |          |          | WD        |
| C*01:51                          | P                                        | WD                                  | WD    |     |     |      |      |     |     |     | C*01:51                         |          |          |           |
| C*01:52                          | P                                        | WD                                  | WD    |     |     | WD   |      |     |     |     | C*01:52                         |          | WD       |           |
| C*01:54                          | P                                        | WD                                  | WD    |     |     | WD   |      |     |     |     | C*01:54                         |          |          |           |
| C*01:58                          | P                                        | WD                                  | WD    |     |     | WD   | WD   |     |     |     | C*01:58                         |          | WD       | WD        |
| C*01:59                          | P                                        | WD                                  | WD    |     |     | WD   |      |     |     |     | C*01:59                         |          | WD       |           |
| C*01:62                          | P                                        | WD                                  | WD    |     |     | WD   |      |     |     |     | C*01:62                         |          |          |           |
| C*01:63                          | P                                        | o                                   | o     |     |     |      |      |     |     |     | C*01:63                         |          | WD       |           |
| C*01:67                          | P                                        | WD                                  | WD    |     |     |      |      |     |     |     | C*01:67                         |          |          |           |
| C*01:70                          | P                                        | WD                                  | WD    |     |     | WD   |      |     |     |     | C*01:70                         |          |          |           |
| C*01:74                          | P                                        | WD                                  | WD    |     |     | WD   |      |     |     |     | C*01:74                         |          |          |           |

Supplementary Table 3c. Comparison of HLA-C P group two-field assignments among CIWD catalogs <sup>a</sup>

|                                  |                                          | 3.0.0 CIWD                          |       |     |     |      |      |     |     |     | 2.0.0 CWD                       |          | EFI CWD  | China CWD |
|----------------------------------|------------------------------------------|-------------------------------------|-------|-----|-----|------|------|-----|-----|-----|---------------------------------|----------|----------|-----------|
|                                  |                                          | Category by Population <sup>b</sup> |       |     |     |      |      |     |     |     |                                 |          |          |           |
| HLA-C IPD-<br>HLA/IMGT<br>3.31.0 | Nomenclature<br>Designation <sup>a</sup> | Highest<br>Frequency                | Total | AFA | API | EURO | MENA | HIS | NAM | UNK | HLA-C IPD-<br>IMGT/HLA<br>3.9.0 | Category | Category | Category  |
| C*01:96                          | P                                        | WD                                  | WD    |     |     |      |      |     |     |     | C*01:96                         |          |          |           |
| C*01:103                         | P                                        | WD                                  | WD    |     |     | WD   |      |     |     |     | C*01:103                        |          |          |           |
| C*01:121Q                        | Q                                        | WD                                  | WD    |     |     |      |      |     |     |     | C*01:121Q                       |          |          |           |
| C*02:02                          | P                                        | C                                   | C     | C   | C   | C    | C    | C   | C   | C   | C*02:02                         | C        | C        | C         |
| C*02:03                          | P                                        | WD                                  | WD    |     |     | WD   |      |     |     |     | C*02:03                         |          |          |           |
| C*02:04                          | P                                        | WD                                  | WD    |     |     | WD   |      |     | WD  |     | C*02:04                         | WD       | WD       |           |
| C*02:05                          | P                                        | WD                                  | WD    |     |     |      |      |     |     |     | C*02:05                         |          |          |           |
| C*02:06                          | P                                        | I                                   | I     |     |     | I    |      | I   |     | I   | C*02:06                         | WD       | WD       |           |
| C*02:07                          | P                                        | I                                   | I     |     |     | I    | WD   | I   |     | I   | C*02:07                         | WD       | WD       |           |
| C*02:08                          | P                                        | I                                   | I     |     | I   | WD   | WD   | I   |     | WD  | C*02:08                         | WD       | WD       |           |
| C*02:12                          | P                                        | WD                                  | WD    | WD  |     |      |      |     |     |     | C*02:12                         |          |          |           |
| C*02:13                          | P                                        | WD                                  | WD    |     |     | WD   |      |     |     |     | C*02:13                         |          |          |           |
| C*02:14                          | P                                        | C                                   | I     | C   |     | WD   |      | I   |     | I   | C*02:14                         | WD       |          |           |
| C*02:16                          | P                                        | WD                                  | WD    | WD  |     | WD   |      |     |     |     | C*02:16                         |          |          |           |
| C*02:19                          | P                                        | I                                   | WD    |     |     | WD   |      |     |     | I   | C*02:19                         | WD       |          |           |
| C*02:21                          | P                                        | I                                   | WD    |     |     | WD   | WD   | I   |     | I   | C*02:21                         |          |          |           |
| C*02:23                          | P                                        | WD                                  | WD    |     |     | WD   |      |     |     |     | C*02:23                         |          |          |           |
| C*02:24                          | P                                        | WD                                  | WD    |     |     | WD   |      |     |     |     | C*02:24                         |          |          |           |
| C*02:25Q                         | Q                                        | WD                                  | WD    |     |     | WD   |      |     |     |     | C*02:25Q                        |          | WD       |           |
| C*02:26                          | P                                        | I                                   | WD    |     |     | WD   |      |     |     | I   | C*02:26                         |          |          |           |
| C*02:27                          | P                                        | I                                   | WD    | WD  |     | WD   |      | I   |     | WD  | C*02:27                         |          |          |           |
| C*02:30                          | P                                        | WD                                  | WD    |     |     | WD   |      |     |     |     | C*02:30                         |          |          |           |
| C*02:31                          | P                                        | WD                                  | WD    |     |     | WD   |      |     |     |     | C*02:31                         |          |          |           |
| C*02:32                          | P                                        | WD                                  | WD    |     |     | WD   |      |     |     |     | C*02:32                         |          |          |           |
| C*02:34                          | P                                        | WD                                  | WD    |     |     | WD   |      |     |     |     | C*02:34                         |          |          |           |
| C*02:35                          | P                                        | WD                                  | WD    |     |     |      |      |     |     | WD  | C*02:35                         |          |          |           |
| C*02:38N                         | N                                        | WD                                  | WD    |     |     | WD   |      |     |     |     | C*02:38N                        |          | WD       |           |
| C*02:40                          | P                                        | WD                                  | WD    |     |     | WD   |      |     |     |     | C*02:40                         |          |          |           |



Supplementary Table 3c. Comparison of HLA-C P group two-field assignments among CIWD catalogs <sup>a</sup>

|                                  |                                          | 3.0.0 CIWD                          |       |     |     |      |      |     |     |     | 2.0.0 CWD                       |          | EFI CWD  | China CWD |
|----------------------------------|------------------------------------------|-------------------------------------|-------|-----|-----|------|------|-----|-----|-----|---------------------------------|----------|----------|-----------|
|                                  |                                          | Category by Population <sup>b</sup> |       |     |     |      |      |     |     |     |                                 |          |          |           |
| HLA-C IPD-<br>HLA/IMGT<br>3.31.0 | Nomenclature<br>Designation <sup>a</sup> | Highest<br>Frequency                | Total | AFA | API | EURO | MENA | HIS | NAM | UNK | HLA-C IPD-<br>IMGT/HLA<br>3.9.0 | Category | Category | Category  |
| C*02:43                          | P                                        | WD                                  | WD    |     |     | WD   |      |     |     |     | C*02:43                         |          |          |           |
| C*02:44                          | P                                        | WD                                  | WD    |     |     | WD   |      |     |     |     | C*02:44                         |          |          |           |
| C*02:45                          | P                                        | WD                                  | WD    |     |     |      |      |     |     |     | C*02:45                         |          |          |           |
| C*02:46                          | P                                        | WD                                  | WD    |     |     | WD   |      | WD  |     |     | C*02:46                         |          |          |           |
| C*02:48                          | P                                        | WD                                  | WD    |     |     | WD   |      |     |     |     | C*02:48                         |          |          |           |
| C*02:49                          | P                                        | WD                                  | WD    | WD  |     |      |      |     |     |     | C*02:49                         |          |          |           |
| C*02:55                          | P                                        | WD                                  | WD    |     |     | WD   |      |     |     |     | C*02:55                         |          |          |           |
| C*02:56                          | P                                        | WD                                  | WD    |     |     | WD   |      |     |     |     | C*02:56                         |          |          |           |
| C*02:67Q                         | Q                                        | WD                                  | WD    |     |     | WD   |      |     |     |     | C*02:67Q                        |          |          |           |
| C*02:87                          | P                                        | WD                                  | WD    |     |     | WD   |      |     |     |     | C*02:87                         |          |          |           |
| C*02:92N                         | N                                        | WD                                  | WD    |     |     | WD   |      |     |     |     | C*02:92N                        |          |          |           |
| C*03:02                          | P                                        | C                                   | C     | C   | C   | C    | C    | C   | C   | C   | C*03:02                         | C        | C        | C         |
| C*03:03                          | P                                        | C                                   | C     | C   | C   | C    | C    | C   | C   | C   | C*03:03                         | C        | C        | C         |
| C*03:04                          | P                                        | C                                   | C     | C   | C   | C    | C    | C   | C   | C   | C*03:04                         | C        | C        | C         |
| C*03:05                          | P                                        | C                                   | C     | C   | I   | I    | WD   | C   | C   | C   | C*03:05                         | C        |          |           |
| C*03:06                          | P                                        | C                                   | C     | C   | I   | I    | WD   | C   | C   | C   | C*03:06                         | C        |          |           |
| C*03:07                          | P                                        | C                                   | I     | WD  |     | I    |      | C   | WD  | I   | C*03:07                         | WD       |          | WD        |
| C*03:08                          | P                                        | C                                   | I     |     |     | WD   | WD   | C   | C   | I   | C*03:08                         | WD       |          |           |
| C*03:09                          | P                                        | I                                   | I     | WD  |     | I    |      |     |     | I   | C*03:09                         | WD       |          |           |
| C*03:10                          | P                                        | I                                   | I     | WD  |     | I    |      |     |     | I   | C*03:10                         | WD       |          |           |
| C*03:11                          | P                                        | WD                                  | WD    |     |     | WD   |      |     |     | WD  | C*03:11                         |          |          |           |
| C*03:13                          | P                                        | WD                                  | WD    |     |     | WD   |      |     |     |     | C*03:13                         |          |          |           |
| C*03:14                          | P                                        | I                                   | I     |     |     | I    |      | I   |     | I   | C*03:14                         | WD       |          |           |
| C*03:16                          | P                                        | I                                   | I     |     |     | I    | WD   | I   |     | I   | C*03:16                         | WD       |          | WD        |
| C*03:17                          | P                                        | C                                   | WD    |     | C   | WD   |      |     |     | I   | C*03:17                         | WD       |          | WD        |
| C*03:18                          | P                                        | WD                                  | WD    |     |     | WD   |      |     |     | WD  | C*03:18                         |          |          |           |
| C*03:19                          | P                                        | C                                   | I     |     |     | I    | C    | I   |     | I   | C*03:19                         | WD       |          |           |
| C*03:21                          | P                                        | I                                   | WD    |     | I   |      |      |     |     |     | C*03:21                         |          |          | WD        |

Supplementary Table 3c. Comparison of HLA-C P group two-field assignments among CIWD catalogs <sup>a</sup>

|                                  |                                          | 3.0.0 CIWD                          |       |     |     |      |      |     |     |     | 2.0.0 CWD                       |          | EFI CWD  | China CWD |
|----------------------------------|------------------------------------------|-------------------------------------|-------|-----|-----|------|------|-----|-----|-----|---------------------------------|----------|----------|-----------|
|                                  |                                          | Category by Population <sup>b</sup> |       |     |     |      |      |     |     |     |                                 |          |          |           |
| HLA-C IPD-<br>HLA/IMGT<br>3.31.0 | Nomenclature<br>Designation <sup>a</sup> | Highest<br>Frequency                | Total | AFA | API | EURO | MENA | HIS | NAM | UNK | HLA-C IPD-<br>IMGT/HLA<br>3.9.0 | Category | Category | Category  |
| C*03:26                          | P                                        | WD                                  | WD    |     |     | WD   |      |     |     |     | C*03:26                         |          |          |           |
| C*03:28                          | P                                        | WD                                  | WD    |     |     | WD   |      |     |     |     | C*03:28                         |          |          | WD        |
| C*03:30                          | P                                        | WD                                  | WD    |     |     | WD   |      |     |     |     | C*03:30                         |          |          |           |
| C*03:32                          | P                                        | WD                                  | WD    |     | WD  | WD   |      |     |     |     | C*03:32                         |          |          | WD        |
| C*03:35                          | P                                        | WD                                  | WD    |     |     | WD   |      |     |     |     | C*03:35                         | WD       |          | WD        |
| C*03:36                          | P                                        | I                                   | WD    |     | I   |      |      |     |     | I   | C*03:36                         | WD       |          | WD        |
| C*03:37                          | P                                        | WD                                  | WD    |     | WD  |      |      |     |     |     | C*03:37                         |          |          |           |
| C*03:38                          | P                                        | C                                   | WD    | C   |     | WD   |      | I   | C   | I   | C*03:38                         |          |          | WD        |
| C*03:39                          | P                                        | o                                   | o     |     |     |      |      |     |     |     | C*03:39                         |          |          | WD        |
| C*03:40                          | P                                        | I                                   | WD    |     |     | WD   |      | I   |     | I   | C*03:40                         | WD       |          | WD        |
| C*03:41                          | P                                        | WD                                  | WD    |     | WD  | WD   |      |     |     |     | C*03:41                         |          |          | WD        |
| C*03:42                          | P                                        | WD                                  | WD    |     |     | WD   |      |     |     |     | C*03:42                         |          |          |           |
| C*03:43                          | P                                        | WD                                  | WD    |     | WD  | WD   |      |     |     |     | C*03:43                         |          |          | WD        |
| C*03:44                          | P                                        | I                                   | I     |     |     | I    |      |     |     | WD  | C*03:44                         |          |          |           |
| C*03:45                          | P                                        | I                                   | WD    |     |     | WD   |      | I   |     | I   | C*03:45                         |          |          |           |
| C*03:46                          | P                                        | WD                                  | WD    |     |     | WD   |      |     |     |     | C*03:46                         |          |          | WD        |
| C*03:47                          | P                                        | I                                   | WD    |     |     | WD   |      | I   |     | I   | C*03:47                         |          |          |           |
| C*03:48                          | P                                        | o                                   | o     |     |     |      |      |     |     |     | C*03:48                         |          |          | WD        |
| C*03:49                          | P                                        | WD                                  | WD    |     | WD  |      |      |     |     |     | C*03:49                         |          |          |           |
| C*03:51                          | P                                        | WD                                  | WD    |     |     | WD   |      |     |     |     | C*03:51                         |          | WD       |           |
| C*03:53                          | P                                        | WD                                  | WD    |     |     | WD   |      |     |     |     | C*03:53                         |          | WD       |           |
| C*03:54                          | P                                        | WD                                  | WD    |     |     | WD   |      |     |     |     | C*03:54                         |          |          |           |
| C*03:56                          | P                                        | WD                                  | WD    |     | WD  |      |      |     |     |     | C*03:56                         |          |          | WD        |
| C*03:59                          | P                                        | WD                                  | WD    |     |     | WD   |      |     |     |     | C*03:59                         |          |          |           |
| C*03:60                          | P                                        | WD                                  | WD    |     |     |      |      |     |     |     | C*03:60                         |          |          |           |
| C*03:64                          | P                                        | WD                                  | WD    |     |     | WD   |      |     |     |     | C*03:64                         |          |          | WD        |
| C*03:69                          | P                                        | WD                                  | WD    |     |     | WD   |      |     |     |     | C*03:69                         |          |          | WD        |
| C*03:70                          | P                                        | WD                                  | WD    |     |     | WD   |      |     |     |     | C*03:70                         |          |          |           |

Supplementary Table 3c. Comparison of HLA-C P group two-field assignments among CIWD catalogs <sup>a</sup>

|                                  |                                          | 3.0.0 CIWD                          |       |     |     |      |      |     |     |     | 2.0.0 CWD                       |          | EFI CWD  | China CWD |
|----------------------------------|------------------------------------------|-------------------------------------|-------|-----|-----|------|------|-----|-----|-----|---------------------------------|----------|----------|-----------|
|                                  |                                          | Category by Population <sup>b</sup> |       |     |     |      |      |     |     |     |                                 |          |          |           |
| HLA-C IPD-<br>HLA/IMGT<br>3.31.0 | Nomenclature<br>Designation <sup>a</sup> | Highest<br>Frequency                | Total | AFA | API | EURO | MENA | HIS | NAM | UNK | HLA-C IPD-<br>IMGT/HLA<br>3.9.0 | Category | Category | Category  |
| C*03:75                          | P                                        | WD                                  | WD    |     |     | WD   |      |     |     |     | C*03:75                         |          |          |           |
| C*03:76                          | P                                        | o                                   | o     |     |     |      |      |     |     |     | C*03:76                         |          |          | WD        |
| C*03:78                          | P                                        | I                                   | WD    |     |     |      |      | I   |     |     | C*03:78                         |          |          |           |
| C*03:81                          | P                                        | WD                                  | WD    |     |     |      |      |     |     |     | C*03:81                         |          |          |           |
| C*03:85                          | P                                        | I                                   | WD    |     | I   |      |      |     |     |     | C*03:85                         |          |          | WD        |
| C*03:86                          | P                                        | WD                                  | WD    |     |     |      |      |     |     |     | C*03:86                         |          |          |           |
| C*03:87                          | P                                        | I                                   | WD    |     |     | WD   |      | I   |     |     | C*03:87                         |          |          |           |
| C*03:88                          | P                                        | C                                   | I     |     | C   |      | WD   |     |     |     | C*03:88                         | WD       |          |           |
| C*03:91                          | P                                        | WD                                  | WD    |     |     | WD   |      |     |     |     | C*03:91                         |          |          |           |
| C*03:94                          | P                                        | I                                   | WD    |     | I   |      |      |     |     |     | C*03:94                         |          |          |           |
| C*03:103                         | P                                        | WD                                  | WD    |     |     |      |      |     |     |     | C*03:103                        |          |          |           |
| C*03:107                         | P                                        | o                                   | o     |     |     |      |      |     |     |     | C*03:107                        |          |          | WD        |
| C*03:109                         | P                                        | WD                                  | WD    |     |     | WD   |      |     |     |     | C*03:109                        |          |          |           |
| C*03:113                         | P                                        | WD                                  | WD    |     |     | WD   |      |     |     |     | C*03:113                        |          |          |           |
| C*03:115                         | P                                        | WD                                  | WD    |     |     | WD   |      |     |     |     | C*03:115                        |          |          |           |
| C*03:116                         | P                                        | WD                                  | WD    |     |     |      |      |     |     |     | C*03:116                        |          |          |           |
| C*03:117                         | P                                        | WD                                  | WD    |     |     | WD   |      |     |     |     | C*03:117                        |          |          |           |
| C*03:120                         | P                                        | WD                                  | WD    |     |     | WD   |      |     |     |     | C*03:120                        |          |          |           |
| C*03:122                         | P                                        | WD                                  | WD    |     |     | WD   |      |     |     |     | C*03:122                        |          |          |           |
| C*03:126                         | P                                        | WD                                  | WD    |     |     | WD   |      |     |     |     | C*03:126                        |          |          |           |
| C*03:127                         | P                                        | WD                                  | WD    |     |     | WD   |      |     |     |     | C*03:127                        |          |          |           |
| C*03:136                         | P                                        | WD                                  | WD    |     |     | WD   |      |     |     |     | C*03:136                        |          | WD       |           |
| C*03:139                         | P                                        | WD                                  | WD    |     |     |      |      |     |     |     | C*03:139                        |          |          |           |
| C*03:140                         | P                                        | WD                                  | WD    |     | WD  |      |      |     |     | WD  | C*03:140                        |          |          |           |
| C*03:143                         | P                                        | I                                   | WD    |     |     | WD   |      | I   |     | I   | C*03:143                        |          |          |           |
| C*03:147                         | P                                        | WD                                  | WD    |     |     | WD   |      |     |     |     | C*03:147                        |          |          |           |
| C*03:148                         | P                                        | WD                                  | WD    |     |     | WD   |      |     |     |     | C*03:148                        |          | WD       |           |
| C*03:151                         | P                                        | WD                                  | WD    |     |     | WD   |      |     |     |     | C*03:151                        |          | WD       |           |

Supplementary Table 3c. Comparison of HLA-C P group two-field assignments among CIWD catalogs <sup>a</sup>

|                                  |                                          | 3.0.0 CIWD                          |       |     |     |      |      |     |     |     | 2.0.0 CWD                       |          | EFI CWD  | China CWD |
|----------------------------------|------------------------------------------|-------------------------------------|-------|-----|-----|------|------|-----|-----|-----|---------------------------------|----------|----------|-----------|
|                                  |                                          | Category by Population <sup>b</sup> |       |     |     |      |      |     |     |     |                                 |          |          |           |
| HLA-C IPD-<br>HLA/IMGT<br>3.31.0 | Nomenclature<br>Designation <sup>a</sup> | Highest<br>Frequency                | Total | AFA | API | EURO | MENA | HIS | NAM | UNK | HLA-C IPD-<br>IMGT/HLA<br>3.9.0 | Category | Category | Category  |
| C*03:153                         | P                                        | I                                   | WD    |     | I   |      |      |     |     |     | C*03:153                        |          |          |           |
| C*03:154                         | P                                        | WD                                  | WD    |     |     | WD   |      |     |     |     | C*03:154                        |          | WD       |           |
| C*03:159                         | P                                        | WD                                  | WD    |     |     |      |      |     |     |     | C*03:159                        |          |          |           |
| C*03:198                         | P                                        | o                                   | o     |     |     |      |      |     |     |     | C*03:198                        |          |          | WD        |
| C*03:204                         | P                                        | o                                   | o     |     |     |      |      |     |     |     | C*03:204                        |          |          | WD        |
| C*03:210                         | P                                        | o                                   | o     |     |     |      |      |     |     |     | C*03:210                        |          |          | WD        |
| C*03:211                         | P                                        | o                                   | o     |     |     |      |      |     |     |     | C*03:211                        |          |          | WD        |
| C*03:251                         | P                                        | WD                                  | WD    |     |     |      |      |     |     |     | C*03:251                        |          |          |           |
| C*03:258                         | P                                        | WD                                  | WD    |     | WD  |      |      |     |     |     | C*03:258                        |          |          |           |
| C*04:01                          | P                                        | C                                   | C     | C   | C   | C    | C    | C   | C   | C   | C*04:01                         | C        | C        | C         |
| C*04:03                          | P                                        | C                                   | C     | C   | C   | C    | C    | C   | C   | C   | C*04:03                         | C        | C        | C         |
| C*04:04                          | P                                        | C                                   | C     | C   | WD  | I    | C    | C   | C   | C   | C*04:04                         | C        |          |           |
| C*04:05                          | P                                        | WD                                  | WD    |     |     | WD   |      |     |     | WD  | C*04:05                         | WD       |          |           |
| C*04:06                          | P                                        | C                                   | I     |     | C   | WD   |      |     |     | C   | C*04:06                         | WD       |          | WD        |
| C*04:07                          | P                                        | C                                   | C     | C   | I   | I    | C    | C   | WD  | C   | C*04:07                         | C        | WD       |           |
| C*04:08                          | P                                        | C                                   | I     | C   |     | WD   |      | I   |     | I   | C*04:08                         | WD       |          | WD        |
| C*04:09N                         | N                                        | C                                   | I     | WD  |     | I    |      | C   | C   | I   | C*04:09N                        | C        | WD       |           |
| C*04:10                          | P                                        | C                                   | I     |     | C   | WD   | WD   | I   | WD  | I   | C*04:10                         | WD       |          |           |
| C*04:11                          | P                                        | WD                                  | WD    |     |     | WD   |      |     |     | WD  | C*04:11                         |          |          |           |
| C*04:12                          | P                                        | WD                                  | WD    |     |     | WD   |      |     |     |     | C*04:12                         |          |          |           |
| C*04:13                          | P                                        | C                                   | I     | C   |     | WD   |      | I   | WD  | I   | C*04:13                         | WD       |          |           |
| C*04:14                          | P                                        | WD                                  | WD    | WD  |     | WD   | WD   |     |     |     | C*04:14                         |          |          |           |
| C*04:15                          | P                                        | WD                                  | WD    |     |     | WD   |      |     |     | WD  | C*04:15                         |          |          |           |
| C*04:16                          | P                                        | WD                                  | WD    |     |     | WD   |      |     |     |     | C*04:16                         |          |          |           |
| C*04:17                          | P                                        | I                                   | WD    |     |     |      |      | I   |     |     | C*04:17                         |          |          |           |
| C*04:19                          | P                                        | C                                   | WD    |     |     |      |      | C   | C   | WD  | C*04:19                         | WD       |          |           |
| C*04:23                          | P                                        | WD                                  | WD    |     |     |      |      |     |     |     | C*04:23                         |          |          |           |
| C*04:24                          | P                                        | WD                                  | WD    |     |     | WD   |      |     |     |     | C*04:24                         |          |          |           |

Supplementary Table 3c. Comparison of HLA-C P group two-field assignments among CIWD catalogs <sup>a</sup>

|                                  |                                          | 3.0.0 CIWD                          |       |     |     |      |      |     |     |     | 2.0.0 CWD                       |          | EFI CWD  | China CWD |
|----------------------------------|------------------------------------------|-------------------------------------|-------|-----|-----|------|------|-----|-----|-----|---------------------------------|----------|----------|-----------|
|                                  |                                          | Category by Population <sup>b</sup> |       |     |     |      |      |     |     |     |                                 |          |          |           |
| HLA-C IPD-<br>HLA/IMGT<br>3.31.0 | Nomenclature<br>Designation <sup>a</sup> | Highest<br>Frequency                | Total | AFA | API | EURO | MENA | HIS | NAM | UNK | HLA-C IPD-<br>IMGT/HLA<br>3.9.0 | Category | Category | Category  |
| C*04:26                          | P                                        | I                                   | WD    |     | I   |      |      |     |     |     | C*04:26                         |          |          |           |
| C*04:27                          | P                                        | C                                   | WD    | C   |     |      |      |     |     | WD  | C*04:27                         | WD       |          |           |
| C*04:29                          | P                                        | WD                                  | WD    |     | WD  | WD   | WD   |     |     | WD  | C*04:29                         |          |          |           |
| C*04:32                          | P                                        | WD                                  | WD    |     |     | WD   |      |     |     |     | C*04:32                         |          |          |           |
| C*04:33                          | P                                        | WD                                  | WD    | WD  | WD  | WD   | WD   | WD  |     | WD  | C*04:33                         |          |          |           |
| C*04:34                          | P                                        | WD                                  | WD    | WD  |     |      |      |     |     |     | C*04:34                         |          |          |           |
| C*04:36                          | P                                        | WD                                  | WD    | WD  |     |      |      |     |     |     | C*04:36                         |          |          |           |
| C*04:37                          | P                                        | WD                                  | WD    |     |     | WD   |      |     |     |     | C*04:37                         |          |          |           |
| C*04:39                          | P                                        | WD                                  | WD    |     |     |      | WD   |     |     |     | C*04:39                         |          |          |           |
| C*04:40                          | P                                        | WD                                  | WD    | WD  |     |      |      |     |     |     | C*04:40                         |          |          |           |
| C*04:45                          | P                                        | WD                                  | WD    |     |     | WD   |      |     |     |     | C*04:45                         |          |          |           |
| C*04:46                          | P                                        | I                                   | WD    |     |     |      |      | I   |     |     | C*04:46                         |          |          |           |
| C*04:47                          | P                                        | WD                                  | WD    |     |     | WD   |      |     |     |     | C*04:47                         |          |          |           |
| C*04:52                          | P                                        | WD                                  | WD    |     |     | WD   |      |     |     |     | C*04:52                         |          |          |           |
| C*04:54                          | P                                        | WD                                  | WD    |     |     | WD   |      |     |     |     | C*04:54                         |          |          |           |
| C*04:55                          | P                                        | WD                                  | WD    |     |     | WD   |      |     |     |     | C*04:55                         |          |          |           |
| C*04:56                          | P                                        | WD                                  | WD    |     |     | WD   |      |     |     |     | C*04:56                         |          |          |           |
| C*04:59Q                         | Q                                        | WD                                  | WD    |     |     | WD   |      |     |     |     | C*04:59Q                        |          | WD       |           |
| C*04:62                          | P                                        | o                                   | o     |     |     |      |      |     |     |     | C*04:62                         |          | WD       |           |
| C*04:63                          | P                                        | WD                                  | WD    |     |     | WD   |      |     |     |     | C*04:63                         |          |          |           |
| C*04:65                          | P                                        | WD                                  | WD    |     |     | WD   |      |     |     |     | C*04:65                         |          |          |           |
| C*04:69                          | P                                        | o                                   | o     |     |     |      |      |     |     |     | C*04:69                         |          |          | WD        |
| C*04:70                          | P                                        | WD                                  | WD    |     |     |      |      |     |     |     | C*04:70                         |          |          | WD        |
| C*04:71                          | P                                        | WD                                  | WD    |     |     | WD   |      |     |     |     | C*04:71                         |          |          |           |
| C*04:75                          | P                                        | WD                                  | WD    |     |     | WD   |      |     |     |     | C*04:75                         |          | WD       |           |
| C*04:77                          | P                                        | WD                                  | WD    |     |     | WD   |      |     |     |     | C*04:77                         |          |          |           |
| C*04:81                          | P                                        | o                                   | o     |     |     |      |      |     |     |     | C*04:81                         |          |          | WD        |
| C*04:86                          | P                                        | WD                                  | WD    |     |     | WD   |      |     |     |     | C*04:86                         |          |          |           |

Supplementary Table 3c. Comparison of HLA-C P group two-field assignments among CIWD catalogs <sup>a</sup>

|                                  |                                          | 3.0.0 CIWD                          |       |     |     |      |      |     |     |     | 2.0.0 CWD                       |          | EFI CWD  | China CWD |
|----------------------------------|------------------------------------------|-------------------------------------|-------|-----|-----|------|------|-----|-----|-----|---------------------------------|----------|----------|-----------|
|                                  |                                          | Category by Population <sup>b</sup> |       |     |     |      |      |     |     |     |                                 |          |          |           |
| HLA-C IPD-<br>HLA/IMGT<br>3.31.0 | Nomenclature<br>Designation <sup>a</sup> | Highest<br>Frequency                | Total | AFA | API | EURO | MENA | HIS | NAM | UNK | HLA-C IPD-<br>IMGT/HLA<br>3.9.0 | Category | Category | Category  |
| C*04:87                          | P                                        | WD                                  | WD    |     |     |      |      |     |     |     | C*04:87                         |          |          |           |
| C*04:93N                         | N                                        | WD                                  | WD    |     |     | WD   |      |     |     |     | C*04:93N                        |          | WD       |           |
| C*04:95N                         | N                                        | WD                                  | WD    |     |     | WD   |      |     |     |     | C*04:95N                        |          |          |           |
| C*04:96                          | P                                        | WD                                  | WD    |     |     | WD   |      |     |     |     | C*04:96                         |          | WD       |           |
| C*04:104                         | P                                        | WD                                  | WD    |     |     |      |      |     |     |     | C*04:104                        |          | WD       |           |
| C*04:108                         | P                                        | WD                                  | WD    |     |     |      |      |     |     |     | C*04:108                        |          |          |           |
| C*04:113                         | P                                        | WD                                  | WD    |     |     |      |      |     |     |     | C*04:113                        |          |          |           |
| C*04:114                         | P                                        | WD                                  | WD    |     |     | WD   |      |     |     |     | C*04:114                        |          |          |           |
| C*04:118                         | P                                        | WD                                  | WD    |     |     | WD   |      |     |     |     | C*04:118                        |          | WD       |           |
| C*04:121                         | P                                        | WD                                  | WD    |     |     |      |      |     |     |     | C*04:121                        |          |          |           |
| C*04:125                         | P                                        | WD                                  | WD    |     |     | WD   |      |     |     |     | C*04:125                        |          |          |           |
| C*04:130                         | P                                        | o                                   | o     |     |     |      |      |     |     |     | C*04:130                        |          |          | WD        |
| C*04:131                         | P                                        | WD                                  | WD    |     |     |      |      | WD  |     |     | C*04:131                        |          |          |           |
| C*04:132                         | P                                        | WD                                  | WD    |     |     | WD   | WD   |     |     |     | C*04:132                        |          |          |           |
| C*04:139                         | P                                        | WD                                  | WD    |     |     | WD   |      |     |     |     | C*04:139                        |          |          |           |
| C*04:141                         | P                                        | WD                                  | WD    |     |     |      | WD   |     |     |     | C*04:141                        |          |          |           |
| C*04:150                         | P                                        | WD                                  | WD    |     |     | WD   |      |     |     |     | C*04:150                        |          |          |           |
| C*04:153                         | P                                        | WD                                  | WD    |     |     | WD   |      |     |     |     | C*04:153                        |          |          |           |
| C*04:155                         | P                                        | WD                                  | WD    |     |     |      |      |     |     |     | C*04:155                        |          |          |           |
| C*04:163                         | P                                        | WD                                  | WD    |     | WD  |      |      |     |     |     | C*04:163                        |          |          |           |
| C*04:180                         | P                                        | WD                                  | WD    |     |     |      |      |     |     |     | C*04:180                        |          |          |           |
| C*04:204                         | P                                        | WD                                  | WD    |     | WD  |      |      |     |     |     | C*04:204                        |          |          |           |
| C*04:207                         | P                                        | WD                                  | WD    |     | WD  |      |      |     |     |     | C*04:207                        |          |          |           |
| C*04:209                         | P                                        | WD                                  | WD    |     |     |      |      |     |     |     | C*04:209                        |          |          |           |
| C*04:218                         | P                                        | WD                                  | WD    |     |     |      |      |     |     |     | C*04:218                        |          |          |           |
| C*05:01                          | P                                        | C                                   | C     | C   | C   | C    | C    | C   | C   | C   | C*05:01                         | C        | C        | C         |
| C*05:04                          | P                                        | I                                   | WD    |     |     | WD   |      | I   |     | WD  | C*05:04                         | WD       | WD       |           |
| C*05:05                          | P                                        | I                                   | I     |     |     | I    |      | WD  |     | I   | C*05:05                         | WD       | WD       |           |

Supplementary Table 3c. Comparison of HLA-C P group two-field assignments among CIWD catalogs <sup>a</sup>

|                                  |                                          | 3.0.0 CIWD                          |       |     |     |      |      |     |     |     | 2.0.0 CWD                       |          | EFI CWD  | China CWD |
|----------------------------------|------------------------------------------|-------------------------------------|-------|-----|-----|------|------|-----|-----|-----|---------------------------------|----------|----------|-----------|
|                                  |                                          | Category by Population <sup>b</sup> |       |     |     |      |      |     |     |     |                                 |          |          |           |
| HLA-C IPD-<br>HLA/IMGT<br>3.31.0 | Nomenclature<br>Designation <sup>a</sup> | Highest<br>Frequency                | Total | AFA | API | EURO | MENA | HIS | NAM | UNK | HLA-C IPD-<br>IMGT/HLA<br>3.9.0 | Category | Category | Category  |
| C*05:06                          | P                                        | WD                                  | WD    |     |     | WD   |      |     |     |     | C*05:06                         |          | WD       |           |
| C*05:07N                         | N                                        | I                                   | I     |     |     | I    |      | I   |     | I   | C*05:07N                        | WD       | WD       |           |
| C*05:08                          | P                                        | I                                   | I     |     |     | I    |      | I   |     | I   | C*05:08                         | WD       | WD       |           |
| C*05:09                          | P                                        | C                                   | I     | WD  |     | I    |      | C   | C   | C   | C*05:09                         | WD       | WD       |           |
| C*05:10                          | P                                        | WD                                  | WD    |     |     | WD   |      |     |     | WD  | C*05:10                         | WD       |          |           |
| C*05:11                          | P                                        | WD                                  | WD    | WD  |     | WD   |      |     |     | WD  | C*05:11                         |          | WD       |           |
| C*05:13                          | P                                        | WD                                  | WD    |     |     | WD   |      |     |     |     | C*05:13                         |          | WD       |           |
| C*05:14                          | P                                        | I                                   | WD    |     |     | WD   |      |     |     | I   | C*05:14                         | WD       | WD       |           |
| C*05:15                          | P                                        | WD                                  | WD    |     |     | WD   |      |     |     |     | C*05:15                         |          | WD       |           |
| C*05:16                          | P                                        | WD                                  | WD    |     |     | WD   |      |     |     |     | C*05:16                         |          | WD       |           |
| C*05:18                          | P                                        | WD                                  | WD    |     |     | WD   | WD   |     |     |     | C*05:18                         |          | WD       |           |
| C*05:19                          | P                                        | WD                                  | WD    |     |     | WD   |      |     |     |     | C*05:19                         |          | WD       |           |
| C*05:22                          | P                                        | WD                                  | WD    |     |     | WD   |      |     |     |     | C*05:22                         |          | WD       |           |
| C*05:24                          | P                                        | WD                                  | WD    |     |     | WD   |      |     |     |     | C*05:24                         |          | WD       |           |
| C*05:26                          | P                                        | WD                                  | WD    |     |     | WD   | WD   |     |     |     | C*05:26                         |          |          |           |
| C*05:27                          | P                                        | WD                                  | WD    |     |     | WD   |      |     |     |     | C*05:27                         |          |          |           |
| C*05:28                          | P                                        | WD                                  | WD    |     |     | WD   |      |     |     |     | C*05:28                         |          | WD       |           |
| C*05:29                          | P                                        | WD                                  | WD    |     |     | WD   |      |     |     | WD  | C*05:29                         |          | WD       |           |
| C*05:32                          | P                                        | WD                                  | WD    |     |     | WD   |      |     |     |     | C*05:32                         |          | WD       |           |
| C*05:33                          | P                                        | WD                                  | WD    |     |     | WD   |      |     |     |     | C*05:33                         |          |          |           |
| C*05:34                          | P                                        | WD                                  | WD    |     |     | WD   |      |     |     |     | C*05:34                         |          | WD       |           |
| C*05:35                          | P                                        | WD                                  | WD    |     |     | WD   |      |     |     |     | C*05:35                         |          |          |           |
| C*05:36                          | P                                        | WD                                  | WD    |     |     | WD   |      |     |     | WD  | C*05:36                         |          |          |           |
| C*05:39                          | P                                        | WD                                  | WD    |     |     | WD   |      |     |     |     | C*05:39                         |          | WD       |           |
| C*05:43                          | P                                        | WD                                  | WD    |     |     | WD   |      |     |     |     | C*05:43                         |          |          |           |
| C*05:44                          | P                                        | WD                                  | WD    |     |     | WD   |      |     |     |     | C*05:44                         |          | WD       |           |
| C*05:46                          | P                                        | WD                                  | WD    |     |     | WD   |      |     |     |     | C*05:46                         |          |          |           |
| C*05:47                          | P                                        | WD                                  | WD    |     |     | WD   |      |     |     |     | C*05:47                         |          | WD       |           |

Supplementary Table 3c. Comparison of HLA-C P group two-field assignments among CIWD catalogs <sup>a</sup>

|                                  |                                          | 3.0.0 CIWD                          |       |     |     |      |      |     |     |     | 2.0.0 CWD                       |          | EFI CWD  | China CWD |
|----------------------------------|------------------------------------------|-------------------------------------|-------|-----|-----|------|------|-----|-----|-----|---------------------------------|----------|----------|-----------|
|                                  |                                          | Category by Population <sup>b</sup> |       |     |     |      |      |     |     |     |                                 |          |          |           |
| HLA-C IPD-<br>HLA/IMGT<br>3.31.0 | Nomenclature<br>Designation <sup>a</sup> | Highest<br>Frequency                | Total | AFA | API | EURO | MENA | HIS | NAM | UNK | HLA-C IPD-<br>IMGT/HLA<br>3.9.0 | Category | Category | Category  |
| C*05:51Q                         | Q                                        | WD                                  | WD    |     |     | WD   |      |     |     |     | C*05:51Q                        |          |          |           |
| C*05:55                          | P                                        | WD                                  | WD    |     |     | WD   |      |     |     |     | C*05:55                         |          |          |           |
| C*05:65                          | P                                        | WD                                  | WD    |     |     | WD   |      |     |     |     | C*05:65                         |          |          |           |
| C*05:67                          | P                                        | WD                                  | WD    |     |     | WD   |      |     |     |     | C*05:67                         |          |          |           |
| C*05:77                          | P                                        | WD                                  | WD    |     |     | WD   |      |     |     |     | C*05:77                         |          |          |           |
| C*05:80                          | P                                        | WD                                  | WD    |     |     | WD   |      |     |     |     | C*05:80                         |          |          |           |
| C*05:97                          | P                                        | WD                                  | WD    |     |     | WD   |      |     |     |     | C*05:97                         |          |          |           |
| C*05:98                          | P                                        | WD                                  | WD    |     |     | WD   |      |     |     |     | C*05:98                         |          |          |           |
| C*05:99N                         | N                                        | WD                                  | WD    |     |     | WD   |      |     |     |     | C*05:99N                        |          |          |           |
| C*05:104                         | P                                        | WD                                  | WD    |     |     | WD   |      |     |     |     | C*05:104                        |          |          |           |
| C*05:111                         | P                                        | WD                                  | WD    |     |     | WD   |      |     |     |     | C*05:111                        |          |          |           |
| C*06:02                          | P                                        | C                                   | C     | C   | C   | C    | C    | C   | C   | C   | C*06:02                         | C        | C        | C         |
| C*06:03                          | P                                        | WD                                  | WD    |     |     | WD   |      |     |     |     | C*06:03                         |          |          |           |
| C*06:04                          | P                                        | I                                   | I     |     |     | I    |      |     |     | WD  | C*06:04                         | WD       |          | WD        |
| C*06:06                          | P                                        | C                                   | I     | WD  | WD  | I    | C    | I   |     | I   | C*06:06                         | WD       |          | WD        |
| C*06:07                          | P                                        | I                                   | I     |     |     | I    |      | WD  |     | I   | C*06:07                         | WD       |          |           |
| C*06:08                          | P                                        | C                                   | WD    | C   |     | WD   |      | I   |     | I   | C*06:08                         | WD       |          |           |
| C*06:09                          | P                                        | C                                   | WD    | C   |     | WD   |      | I   |     | WD  | C*06:09                         | WD       |          |           |
| C*06:10                          | P                                        | WD                                  | WD    |     |     | WD   |      |     |     |     | C*06:10                         |          |          |           |
| C*06:11                          | P                                        | WD                                  | WD    |     |     | WD   | WD   |     |     |     | C*06:11                         |          |          |           |
| C*06:12                          | P                                        | WD                                  | WD    |     |     |      |      |     |     |     | C*06:12                         |          |          |           |
| C*06:13                          | P                                        | WD                                  | WD    |     |     | WD   |      |     |     |     | C*06:13                         |          |          |           |
| C*06:14                          | P                                        | WD                                  | WD    |     |     | WD   |      |     |     |     | C*06:14                         |          |          |           |
| C*06:16N                         | N                                        | WD                                  | WD    |     |     | WD   |      |     |     |     | C*06:16N                        |          |          |           |
| C*06:18                          | P                                        | I                                   | WD    |     |     | I    |      |     |     |     | C*06:18                         |          |          |           |
| C*06:23                          | P                                        | WD                                  | WD    |     |     | WD   |      |     |     |     | C*06:23                         |          |          |           |
| C*06:26                          | P                                        | WD                                  | WD    |     |     | WD   |      |     |     |     | C*06:26                         |          |          |           |
| C*06:27                          | P                                        | C                                   | I     |     | C   | WD   | WD   |     |     | WD  | C*06:27                         | WD       |          |           |



Supplementary Table 3c. Comparison of HLA-C P group two-field assignments among CIWD catalogs <sup>a</sup>

|                                  |                                          | 3.0.0 CIWD                          |       |     |     |      |      |     |     |     | 2.0.0 CWD                       |          | EFI CWD  | China CWD |
|----------------------------------|------------------------------------------|-------------------------------------|-------|-----|-----|------|------|-----|-----|-----|---------------------------------|----------|----------|-----------|
|                                  |                                          | Category by Population <sup>b</sup> |       |     |     |      |      |     |     |     |                                 |          |          |           |
| HLA-C IPD-<br>HLA/IMGT<br>3.31.0 | Nomenclature<br>Designation <sup>a</sup> | Highest<br>Frequency                | Total | AFA | API | EURO | MENA | HIS | NAM | UNK | HLA-C IPD-<br>IMGT/HLA<br>3.9.0 | Category | Category | Category  |
| C*06:28                          | P                                        | WD                                  | WD    |     |     | WD   |      |     |     |     | C*06:28                         |          |          |           |
| C*06:30                          | P                                        | WD                                  | WD    |     |     | WD   |      |     |     |     | C*06:30                         |          |          |           |
| C*06:32                          | P                                        | WD                                  | WD    |     |     | WD   |      |     |     |     | C*06:32                         |          |          |           |
| C*06:34                          | P                                        | WD                                  | WD    |     |     | WD   | WD   |     |     |     | C*06:34                         |          |          |           |
| C*06:35                          | P                                        | I                                   | WD    |     | I   |      |      |     |     |     | C*06:35                         |          |          |           |
| C*06:37                          | P                                        | WD                                  | WD    |     |     |      |      |     |     |     | C*06:37                         |          |          |           |
| C*06:38                          | P                                        | WD                                  | WD    |     |     | WD   |      |     |     |     | C*06:38                         |          |          |           |
| C*06:39                          | P                                        | WD                                  | WD    |     |     |      |      |     |     |     | C*06:39                         |          |          |           |
| C*06:47                          | P                                        | WD                                  | WD    |     |     | WD   |      |     |     |     | C*06:47                         |          |          |           |
| C*06:50                          | P                                        | WD                                  | WD    |     |     | WD   |      |     |     |     | C*06:50                         |          |          |           |
| C*06:53                          | P                                        | WD                                  | WD    |     |     |      | WD   |     |     |     | C*06:53                         |          |          |           |
| C*06:54                          | P                                        | WD                                  | WD    |     |     | WD   |      |     |     |     | C*06:54                         |          |          |           |
| C*06:58                          | P                                        | WD                                  | WD    |     |     | WD   |      |     |     |     | C*06:58                         |          |          |           |
| C*06:59                          | P                                        | WD                                  | WD    |     |     | WD   |      |     |     | WD  | C*06:59                         |          |          |           |
| C*06:65                          | P                                        | WD                                  | WD    |     |     | WD   |      |     |     |     | C*06:65                         |          | WD       |           |
| C*06:66                          | P                                        | WD                                  | WD    |     |     | WD   |      |     |     |     | C*06:66                         |          |          |           |
| C*06:70                          | P                                        | WD                                  | WD    |     |     | WD   |      |     |     |     | C*06:70                         |          |          |           |
| C*06:71                          | P                                        | WD                                  | WD    |     |     | WD   |      |     |     |     | C*06:71                         |          |          |           |
| C*06:79N                         | N                                        | I                                   | WD    |     | I   |      |      |     |     |     | C*06:79N                        |          |          |           |
| C*06:86                          | P                                        | WD                                  | WD    |     |     | WD   |      |     |     |     | C*06:86                         |          |          |           |
| C*06:87                          | P                                        | WD                                  | WD    |     |     | WD   |      |     |     |     | C*06:87                         |          |          |           |
| C*06:91                          | P                                        | WD                                  | WD    |     |     | WD   |      |     |     |     | C*06:91                         |          | WD       |           |
| C*06:96                          | P                                        | WD                                  | WD    |     | WD  |      |      |     |     |     | C*06:96                         |          |          |           |
| C*06:103                         | P                                        | o                                   | o     |     |     |      |      |     |     |     | C*06:103                        |          |          | WD        |
| C*06:104                         | P                                        | o                                   | o     |     |     |      |      |     |     |     | C*06:104                        |          |          | WD        |
| C*06:106                         | P                                        | o                                   | o     |     |     |      |      |     |     |     | C*06:106                        |          |          | WD        |
| C*06:115                         | P                                        | WD                                  | WD    |     | WD  |      |      |     |     |     | C*06:115                        |          |          |           |
| C*06:127                         | P                                        | I                                   | WD    |     | I   |      |      |     |     |     | C*06:127                        |          |          |           |

Supplementary Table 3c. Comparison of HLA-C P group two-field assignments among CIWD catalogs <sup>a</sup>

|                                  |                                          | 3.0.0 CIWD                          |       |     |     |      |      |     |     |     | 2.0.0 CWD                       |          | EFI CWD  | China CWD |
|----------------------------------|------------------------------------------|-------------------------------------|-------|-----|-----|------|------|-----|-----|-----|---------------------------------|----------|----------|-----------|
|                                  |                                          | Category by Population <sup>b</sup> |       |     |     |      |      |     |     |     |                                 |          |          |           |
| HLA-C IPD-<br>HLA/IMGT<br>3.31.0 | Nomenclature<br>Designation <sup>a</sup> | Highest<br>Frequency                | Total | AFA | API | EURO | MENA | HIS | NAM | UNK | HLA-C IPD-<br>IMGT/HLA<br>3.9.0 | Category | Category | Category  |
| C*06:138                         | P                                        | WD                                  | WD    |     |     |      |      |     |     |     | C*06:138                        |          |          |           |
| C*07:01                          | P                                        | C                                   | C     | C   | C   | C    | C    | C   | C   | C   | C*07:01                         | C        | C        | C         |
| C*07:02                          | P                                        | C                                   | C     | C   | C   | C    | C    | C   | C   | C   | C*07:02                         | C        | C        | C         |
| C*07:04                          | P                                        | C                                   | C     | C   | C   | C    | C    | C   | C   | C   | C*07:04                         | C        | C        | C         |
| C*07:05                          | P                                        | C                                   | I     | C   |     | WD   | WD   | I   | WD  | I   | C*07:05                         | WD       | WD       |           |
| C*07:07                          | P                                        | I                                   | I     |     |     | I    | WD   | I   |     | I   | C*07:07                         | WD       | C        |           |
| C*07:08                          | P                                        | o                                   | o     |     |     |      |      |     |     |     | C*07:08                         |          | WD       |           |
| C*07:09                          | P                                        | WD                                  | WD    |     |     |      |      |     |     |     | C*07:09                         |          |          |           |
| C*07:10                          | P                                        | I                                   | I     |     |     | I    |      |     |     | I   | C*07:10                         | WD       | WD       |           |
| C*07:12                          | P                                        | I                                   | I     |     |     | I    |      |     |     | I   | C*07:12                         | WD       | WD       |           |
| C*07:13                          | P                                        | I                                   | WD    |     | I   | WD   | WD   |     |     | WD  | C*07:13                         | WD       | WD       |           |
| C*07:15                          | P                                        | I                                   | WD    |     |     | I    |      |     |     |     | C*07:15                         |          | WD       |           |
| C*07:16                          | P                                        | I                                   | WD    |     |     | WD   |      |     |     | I   | C*07:16                         |          | WD       | WD        |
| C*07:17                          | P                                        | C                                   | I     | WD  |     | I    |      | C   | C   | I   | C*07:17                         | WD       | WD       |           |
| C*07:19                          | P                                        | C                                   | I     | C   |     | I    | C    | I   |     | I   | C*07:19                         | WD       | WD       | WD        |
| C*07:21                          | P                                        | I                                   | WD    |     |     | WD   |      |     |     | I   | C*07:21                         | WD       | WD       |           |
| C*07:22                          | P                                        | I                                   | I     |     |     | I    |      |     |     | I   | C*07:22                         | WD       | WD       |           |
| C*07:24                          | P                                        | WD                                  | WD    |     |     | WD   |      |     |     | WD  | C*07:24                         | WD       | WD       |           |
| C*07:25                          | P                                        | I                                   | I     |     |     | I    |      |     |     | I   | C*07:25                         | WD       | WD       |           |
| C*07:26                          | P                                        | C                                   | C     | WD  | C   | WD   | WD   | WD  | C   | I   | C*07:26                         | WD       | WD       | WD        |
| C*07:27                          | P                                        | C                                   | I     |     | C   | I    | C    | I   |     | I   | C*07:27                         | WD       | WD       | WD        |
| C*07:28                          | P                                        | WD                                  | WD    | WD  |     | WD   |      |     |     |     | C*07:28                         |          |          |           |
| C*07:29                          | P                                        | C                                   | I     |     | C   | WD   |      |     |     | I   | C*07:29                         | WD       | WD       |           |
| C*07:31                          | P                                        | WD                                  | WD    |     |     | WD   |      |     |     |     | C*07:31                         |          | WD       |           |
| C*07:32N                         | N                                        | WD                                  | WD    |     |     | WD   |      |     |     | WD  | C*07:32N                        | WD       | WD       |           |
| C*07:33N                         | N                                        | WD                                  | WD    |     |     | WD   |      |     |     |     | C*07:33N                        |          |          |           |
| C*07:35                          | P                                        | C                                   | WD    | C   |     |      |      | I   |     | I   | C*07:35                         | WD       |          |           |
| C*07:36                          | P                                        | I                                   | I     |     |     | I    | WD   |     |     |     | C*07:36                         |          | WD       |           |

Supplementary Table 3c. Comparison of HLA-C P group two-field assignments among CIWD catalogs <sup>a</sup>

|                                  |                                          | 3.0.0 CIWD                          |       |     |     |      |      |     |     |     | 2.0.0 CWD                       |          | EFI CWD  | China CWD |
|----------------------------------|------------------------------------------|-------------------------------------|-------|-----|-----|------|------|-----|-----|-----|---------------------------------|----------|----------|-----------|
|                                  |                                          | Category by Population <sup>b</sup> |       |     |     |      |      |     |     |     |                                 |          |          |           |
| HLA-C IPD-<br>HLA/IMGT<br>3.31.0 | Nomenclature<br>Designation <sup>a</sup> | Highest<br>Frequency                | Total | AFA | API | EURO | MENA | HIS | NAM | UNK | HLA-C IPD-<br>IMGT/HLA<br>3.9.0 | Category | Category | Category  |
| C*07:37                          | P                                        | WD                                  | WD    |     |     | WD   |      |     |     |     | C*07:37                         |          | WD       |           |
| C*07:38                          | P                                        | WD                                  | WD    |     |     | WD   |      |     |     |     | C*07:38                         |          |          |           |
| C*07:39                          | P                                        | WD                                  | WD    |     |     | WD   |      |     |     |     | C*07:39                         |          |          |           |
| C*07:40                          | P                                        | I                                   | I     |     |     | I    |      |     |     | WD  | C*07:40                         | WD       | WD       |           |
| C*07:43                          | P                                        | I                                   | WD    |     | I   |      |      |     |     |     | C*07:43                         | WD       |          | WD        |
| C*07:44                          | P                                        | WD                                  | WD    |     |     | WD   |      |     |     |     | C*07:44                         |          |          |           |
| C*07:46                          | P                                        | I                                   | I     |     |     | I    |      |     |     | WD  | C*07:46                         | WD       | WD       |           |
| C*07:48                          | P                                        | I                                   | WD    |     | I   |      |      |     |     |     | C*07:48                         |          |          |           |
| C*07:49                          | P                                        | WD                                  | WD    |     |     | WD   |      |     |     |     | C*07:49                         |          | WD       |           |
| C*07:51                          | P                                        | WD                                  | WD    |     | WD  | WD   |      |     |     | WD  | C*07:51                         |          | WD       | WD        |
| C*07:54                          | P                                        | WD                                  | WD    |     |     | WD   |      |     |     |     | C*07:54                         |          | WD       |           |
| C*07:55N                         | N                                        | WD                                  | WD    |     |     | WD   |      |     |     |     | C*07:55N                        |          | WD       |           |
| C*07:56                          | P                                        | I                                   | WD    |     | I   |      |      |     |     |     | C*07:56                         | WD       |          | WD        |
| C*07:57                          | P                                        | WD                                  | WD    |     |     | WD   |      |     |     |     | C*07:57                         |          |          |           |
| C*07:60                          | P                                        | I                                   | I     |     |     | I    |      |     |     |     | C*07:60                         | WD       | WD       |           |
| C*07:61N                         | N                                        | WD                                  | WD    | WD  |     |      |      |     |     |     | C*07:61N                        | WD       |          |           |
| C*07:63                          | P                                        | I                                   | WD    |     | I   |      |      |     |     |     | C*07:63                         |          |          | WD        |
| C*07:67                          | P                                        | o                                   | o     |     |     |      |      |     |     |     | C*07:67                         | WD       |          | WD        |
| C*07:68                          | P                                        | I                                   | I     |     |     | I    |      |     |     | WD  | C*07:68                         |          | C        |           |
| C*07:70                          | P                                        | WD                                  | WD    |     |     | WD   |      |     |     |     | C*07:70                         |          |          |           |
| C*07:72                          | P                                        | WD                                  | WD    |     |     | WD   |      |     |     | WD  | C*07:72                         | WD       |          |           |
| C*07:73                          | P                                        | WD                                  | WD    |     |     | WD   |      |     |     |     | C*07:73                         |          |          |           |
| C*07:75                          | P                                        | WD                                  | WD    |     |     | WD   |      |     |     |     | C*07:75                         |          | WD       |           |
| C*07:76                          | P                                        | WD                                  | WD    |     |     | WD   |      |     |     |     | C*07:76                         |          | WD       |           |
| C*07:79                          | P                                        | WD                                  | WD    |     |     | WD   |      |     |     |     | C*07:79                         |          | WD       |           |
| C*07:80                          | P                                        | WD                                  | WD    |     |     | WD   | WD   | WD  |     | WD  | C*07:80                         |          |          |           |
| C*07:83                          | P                                        | WD                                  | WD    |     |     | WD   |      |     |     |     | C*07:83                         |          | WD       |           |
| C*07:85                          | P                                        | WD                                  | WD    |     |     | WD   |      |     |     |     | C*07:85                         |          | WD       |           |

Supplementary Table 3c. Comparison of HLA-C P group two-field assignments among CIWD catalogs <sup>a</sup>

|                                  |                                          | 3.0.0 CIWD                          |       |     |     |      |      |     |     |     | 2.0.0 CWD                       |          | EFI CWD  | China CWD |  |
|----------------------------------|------------------------------------------|-------------------------------------|-------|-----|-----|------|------|-----|-----|-----|---------------------------------|----------|----------|-----------|--|
|                                  |                                          | Category by Population <sup>b</sup> |       |     |     |      |      |     |     |     |                                 |          |          |           |  |
| HLA-C IPD-<br>HLA/IMGT<br>3.31.0 | Nomenclature<br>Designation <sup>a</sup> | Highest<br>Frequency                | Total | AFA | API | EURO | MENA | HIS | NAM | UNK | HLA-C IPD-<br>IMGT/HLA<br>3.9.0 | Category | Category | Category  |  |
| C*07:88                          | P                                        | WD                                  | WD    |     |     | WD   |      |     |     |     | C*07:88                         |          | WD       |           |  |
| C*07:89                          | P                                        | WD                                  | WD    |     |     |      |      |     |     |     | C*07:89                         |          | WD       |           |  |
| C*07:90                          | P                                        | WD                                  | WD    |     |     | WD   |      |     |     |     | C*07:90                         |          | WD       |           |  |
| C*07:91                          | P                                        | WD                                  | WD    |     |     | WD   |      |     |     |     | C*07:91                         |          | WD       |           |  |
| C*07:92                          | P                                        | WD                                  | WD    |     |     | WD   |      |     |     |     | C*07:92                         |          | WD       |           |  |
| C*07:93                          | P                                        | WD                                  | WD    |     |     | WD   | WD   |     |     | WD  | C*07:93                         |          | WD       |           |  |
| C*07:95                          | P                                        | WD                                  | WD    |     |     | WD   |      |     |     |     | C*07:95                         |          | WD       |           |  |
| C*07:96                          | P                                        | WD                                  | WD    |     |     | WD   |      |     |     |     | C*07:96                         |          | WD       |           |  |
| C*07:97                          | P                                        | WD                                  | WD    |     |     | WD   |      |     |     |     | C*07:97                         |          | WD       |           |  |
| C*07:100                         | P                                        | WD                                  | WD    |     |     | WD   |      |     |     |     | C*07:100                        |          | WD       |           |  |
| C*07:101                         | P                                        | WD                                  | WD    |     |     | WD   |      |     |     |     | C*07:101                        |          | WD       |           |  |
| C*07:102                         | P                                        | WD                                  | WD    |     |     | WD   |      |     |     |     | C*07:102                        |          |          |           |  |
| C*07:104N                        | N                                        | WD                                  | WD    |     |     | WD   |      |     |     |     | C*07:104N                       | WD       |          |           |  |
| C*07:105                         | P                                        | WD                                  | WD    |     |     | WD   |      |     |     |     | C*07:105                        |          | WD       |           |  |
| C*07:106                         | P                                        | WD                                  | WD    |     |     | WD   |      |     |     |     | C*07:106                        |          | WD       |           |  |
| C*07:108                         | P                                        | WD                                  | WD    |     |     | WD   |      |     |     |     | C*07:108                        |          | WD       |           |  |
| C*07:112                         | P                                        | WD                                  | WD    | WD  |     |      |      |     |     |     | C*07:112                        |          |          |           |  |
| C*07:114                         | P                                        | WD                                  | WD    |     |     | WD   |      |     |     |     | C*07:114                        |          | WD       |           |  |
| C*07:116                         | P                                        | WD                                  | WD    |     |     | WD   |      |     |     |     | C*07:116                        |          | WD       |           |  |
| C*07:117                         | P                                        | WD                                  | WD    |     |     | WD   |      |     |     |     | C*07:117                        |          | WD       |           |  |
| C*07:118                         | P                                        | WD                                  | WD    |     |     | WD   |      |     |     |     | C*07:118                        |          | WD       |           |  |
| C*07:119                         | P                                        | WD                                  | WD    |     |     | WD   |      |     |     | WD  | C*07:119                        |          |          |           |  |
| C*07:120                         | P                                        | WD                                  | WD    |     |     | WD   |      |     |     |     | C*07:120                        |          | WD       |           |  |
| C*07:121Q                        | Q                                        | WD                                  | WD    |     |     | WD   |      |     |     |     | C*07:121Q                       |          | WD       |           |  |
| C*07:122                         | P                                        | WD                                  | WD    |     |     | WD   |      |     |     |     | C*07:122                        |          |          |           |  |
| C*07:123                         | P                                        | WD                                  | WD    |     |     |      |      |     |     |     | C*07:123                        |          |          |           |  |
| C*07:124                         | P                                        | WD                                  | WD    |     |     | WD   |      |     |     | WD  | C*07:124                        |          | WD       |           |  |
| C*07:126                         | P                                        | WD                                  | WD    |     |     | WD   |      |     |     |     | C*07:126                        |          |          |           |  |

Supplementary Table 3c. Comparison of HLA-C P group two-field assignments among CIWD catalogs <sup>a</sup>

|                                  |                                          | 3.0.0 CIWD                          |       |     |     |      |      |     |     |     | 2.0.0 CWD                       |          | EFI CWD  | China CWD |
|----------------------------------|------------------------------------------|-------------------------------------|-------|-----|-----|------|------|-----|-----|-----|---------------------------------|----------|----------|-----------|
|                                  |                                          | Category by Population <sup>b</sup> |       |     |     |      |      |     |     |     |                                 |          |          |           |
| HLA-C IPD-<br>HLA/IMGT<br>3.31.0 | Nomenclature<br>Designation <sup>a</sup> | Highest<br>Frequency                | Total | AFA | API | EURO | MENA | HIS | NAM | UNK | HLA-C IPD-<br>IMGT/HLA<br>3.9.0 | Category | Category | Category  |
| C*07:127                         | P                                        | WD                                  | WD    |     |     | WD   |      |     |     |     | C*07:127                        |          | WD       |           |
| C*07:128                         | P                                        | WD                                  | WD    |     |     |      |      |     |     |     | C*07:128                        |          |          |           |
| C*07:130                         | P                                        | WD                                  | WD    |     | WD  | WD   |      |     |     |     | C*07:130                        |          | WD       |           |
| C*07:133                         | P                                        | o                                   | o     |     |     |      |      |     |     |     | C*07:133                        |          | WD       |           |
| C*07:137                         | P                                        | WD                                  | WD    |     |     | WD   |      |     |     |     | C*07:137                        |          | WD       |           |
| C*07:138                         | P                                        | WD                                  | WD    |     |     | WD   |      |     |     |     | C*07:138                        |          | WD       |           |
| C*07:141                         | P                                        | WD                                  | WD    |     |     |      |      |     |     |     | C*07:141                        |          |          |           |
| C*07:143                         | P                                        | WD                                  | WD    |     |     | WD   |      |     |     |     | C*07:143                        |          | WD       |           |
| C*07:147                         | P                                        | WD                                  | WD    |     |     | WD   |      |     |     |     | C*07:147                        |          |          |           |
| C*07:148                         | P                                        | WD                                  | WD    |     |     | WD   |      |     |     |     | C*07:148                        |          | WD       |           |
| C*07:149                         | P                                        | WD                                  | WD    |     |     | WD   |      |     |     |     | C*07:149                        |          |          |           |
| C*07:151                         | P                                        | WD                                  | WD    |     |     | WD   |      |     |     |     | C*07:151                        |          |          |           |
| C*07:154                         | P                                        | WD                                  | WD    |     | WD  |      |      |     |     |     | C*07:154                        |          |          | WD        |
| C*07:155                         | P                                        | WD                                  | WD    |     |     | WD   |      |     |     |     | C*07:155                        |          | WD       |           |
| C*07:165                         | P                                        | WD                                  | WD    |     |     | WD   |      |     |     |     | C*07:165                        |          | WD       |           |
| C*07:169                         | P                                        | o                                   | o     |     |     |      |      |     |     |     | C*07:169                        |          |          | WD        |
| C*07:172                         | P                                        | WD                                  | WD    |     |     | WD   |      |     |     |     | C*07:172                        |          | WD       | WD        |
| C*07:173                         | P                                        | WD                                  | WD    | WD  |     | WD   |      |     |     |     | C*07:173                        |          |          |           |
| C*07:179                         | P                                        | WD                                  | WD    |     |     | WD   |      |     |     |     | C*07:179                        |          | WD       |           |
| C*07:180                         | P                                        | WD                                  | WD    |     |     | WD   |      |     |     |     | C*07:180                        |          | WD       |           |
| C*07:181                         | P                                        | WD                                  | WD    |     |     |      |      |     |     |     | C*07:181                        |          |          |           |
| C*07:184                         | P                                        | WD                                  | WD    | WD  |     |      |      |     |     |     | C*07:184                        |          |          |           |
| C*07:192                         | P                                        | WD                                  | WD    |     |     | WD   |      |     |     |     | C*07:192                        |          | WD       |           |
| C*07:196                         | P                                        | WD                                  | WD    |     |     |      |      |     |     |     | C*07:196                        |          |          |           |
| C*07:198N                        | N                                        | WD                                  | WD    |     |     |      |      |     |     |     | C*07:198N                       |          |          |           |
| C*07:199                         | P                                        | WD                                  | WD    |     | WD  | WD   |      |     |     |     | C*07:199                        |          |          |           |
| C*07:205                         | P                                        | WD                                  | WD    |     |     | WD   |      |     |     |     | C*07:205                        |          | WD       |           |
| C*07:206                         | P                                        | WD                                  | WD    |     |     | WD   |      |     |     |     | C*07:206                        |          |          |           |

Supplementary Table 3c. Comparison of HLA-C P group two-field assignments among CIWD catalogs <sup>a</sup>

|                                  |                                          | 3.0.0 CIWD                          |       |     |     |      |      |     |     |     | 2.0.0 CWD                       |          | EFI CWD  | China CWD |
|----------------------------------|------------------------------------------|-------------------------------------|-------|-----|-----|------|------|-----|-----|-----|---------------------------------|----------|----------|-----------|
|                                  |                                          | Category by Population <sup>b</sup> |       |     |     |      |      |     |     |     |                                 |          |          |           |
| HLA-C IPD-<br>HLA/IMGT<br>3.31.0 | Nomenclature<br>Designation <sup>a</sup> | Highest<br>Frequency                | Total | AFA | API | EURO | MENA | HIS | NAM | UNK | HLA-C IPD-<br>IMGT/HLA<br>3.9.0 | Category | Category | Category  |
| C*07:207                         | P                                        | o                                   | o     |     |     |      |      |     |     |     | C*07:207                        |          | WD       |           |
| C*07:209                         | P                                        | WD                                  | WD    |     |     | WD   |      |     |     |     | C*07:209                        |          |          |           |
| C*07:212                         | P                                        | WD                                  | WD    |     |     | WD   |      |     |     |     | C*07:212                        |          | WD       |           |
| C*07:214                         | P                                        | WD                                  | WD    |     |     | WD   |      |     |     |     | C*07:214                        |          |          |           |
| C*07:218                         | P                                        | WD                                  | WD    |     |     | WD   |      |     |     |     | C*07:218                        |          | WD       |           |
| C*07:222                         | P                                        | WD                                  | WD    |     |     | WD   |      |     |     |     | C*07:222                        |          |          |           |
| C*07:223                         | P                                        | WD                                  | WD    |     |     |      |      |     |     |     | C*07:223                        |          |          |           |
| C*07:224                         | P                                        | WD                                  | WD    |     |     |      |      |     |     |     | C*07:224                        |          |          |           |
| C*07:227N                        | N                                        | WD                                  | WD    |     |     |      |      |     |     |     | C*07:227N                       |          |          |           |
| C*07:232                         | P                                        | I                                   | WD    |     | I   |      |      |     |     |     | C*07:232                        |          |          |           |
| C*07:234                         | P                                        | WD                                  | WD    |     |     | WD   |      |     |     |     | C*07:234                        |          |          |           |
| C*07:241                         | P                                        | WD                                  | WD    |     |     | WD   |      |     |     |     | C*07:241                        |          | WD       |           |
| C*07:242                         | P                                        | WD                                  | WD    |     |     | WD   |      |     |     |     | C*07:242                        |          | WD       |           |
| C*07:243                         | P                                        | WD                                  | WD    |     |     |      |      |     |     |     | C*07:243                        |          |          |           |
| C*07:247                         | P                                        | WD                                  | WD    |     |     |      |      |     |     |     | C*07:247                        |          |          |           |
| C*07:250                         | P                                        | WD                                  | WD    |     |     | WD   |      |     |     |     | C*07:250                        |          |          |           |
| C*07:252                         | P                                        | WD                                  | WD    |     |     | WD   |      |     |     |     | C*07:252                        |          |          |           |
| C*07:256                         | P                                        | WD                                  | WD    |     |     | WD   |      |     |     |     | C*07:256                        |          |          |           |
| C*07:257                         | P                                        | WD                                  | WD    |     |     | WD   |      |     |     |     | C*07:257                        |          |          |           |
| C*07:261                         | P                                        | WD                                  | WD    |     |     | WD   |      |     |     |     | C*07:261                        |          |          |           |
| C*07:262                         | P                                        | WD                                  | WD    |     |     | WD   |      |     |     |     | C*07:262                        |          |          |           |
| C*07:279                         | P                                        | WD                                  | WD    |     |     | WD   |      |     |     |     | C*07:279                        |          |          |           |
| C*07:285                         | P                                        | WD                                  | WD    |     |     | WD   |      |     |     |     | C*07:285                        |          |          |           |
| C*07:287                         | P                                        | WD                                  | WD    |     |     | WD   |      |     |     |     | C*07:287                        |          |          |           |
| C*07:293                         | P                                        | WD                                  | WD    |     |     |      |      |     |     |     | C*07:293                        |          |          |           |
| C*07:298                         | P                                        | WD                                  | WD    |     |     | WD   |      |     |     |     | C*07:298                        |          |          |           |
| C*07:301                         | P                                        | WD                                  | WD    |     |     | WD   |      |     |     |     | C*07:301                        |          |          |           |
| C*07:303                         | P                                        | WD                                  | WD    |     |     | WD   |      |     |     |     | C*07:303                        |          |          |           |

Supplementary Table 3c. Comparison of HLA-C P group two-field assignments among CIWD catalogs <sup>a</sup>

|                                  |                                          | 3.0.0 CIWD                          |       |     |     |      |      |     |     |     | 2.0.0 CWD                       |          | EFI CWD  | China CWD |
|----------------------------------|------------------------------------------|-------------------------------------|-------|-----|-----|------|------|-----|-----|-----|---------------------------------|----------|----------|-----------|
|                                  |                                          | Category by Population <sup>b</sup> |       |     |     |      |      |     |     |     |                                 |          |          |           |
| HLA-C IPD-<br>HLA/IMGT<br>3.31.0 | Nomenclature<br>Designation <sup>a</sup> | Highest<br>Frequency                | Total | AFA | API | EURO | MENA | HIS | NAM | UNK | HLA-C IPD-<br>IMGT/HLA<br>3.9.0 | Category | Category | Category  |
| C*07:312                         | P                                        | WD                                  | WD    |     |     |      |      |     |     |     | C*07:312                        |          |          |           |
| C*07:314                         | P                                        | WD                                  | WD    |     |     |      |      |     |     |     | C*07:314                        |          |          |           |
| C*07:326                         | P                                        | WD                                  | WD    |     |     |      |      | WD  |     |     | C*07:326                        |          |          |           |
| C*07:335                         | P                                        | WD                                  | WD    |     |     | WD   |      |     |     |     | C*07:335                        |          |          |           |
| C*07:339                         | P                                        | I                                   | WD    |     | I   |      |      |     |     |     | C*07:339                        |          |          |           |
| C*07:340                         | P                                        | I                                   | WD    |     | I   |      |      |     |     |     | C*07:340                        |          |          |           |
| C*07:360                         | P                                        | WD                                  | WD    |     |     | WD   |      |     |     |     | C*07:360                        |          |          |           |
| C*07:368                         | P                                        | WD                                  | WD    |     |     |      |      |     |     |     | C*07:368                        |          |          |           |
| C*07:369                         | P                                        | WD                                  | WD    |     |     |      |      |     |     |     | C*07:369                        |          |          |           |
| C*07:391                         | P                                        | WD                                  | WD    |     |     | WD   |      |     |     |     | C*07:391                        |          |          |           |
| C*07:409                         | P                                        | WD                                  | WD    |     |     |      |      |     |     |     | C*07:409                        |          |          |           |
| C*07:450                         | P                                        | WD                                  | WD    |     |     | WD   |      |     |     |     | C*07:450                        |          |          |           |
| C*07:452N                        | N                                        | WD                                  | WD    |     |     | WD   |      |     |     |     | C*07:452N                       |          |          |           |
| C*08:01                          | P                                        | C                                   | C     | C   | C   | C    | C    | C   | C   | C   | C*08:01                         | C        | C        | C         |
| C*08:02                          | P                                        | C                                   | C     | C   | C   | C    | C    | C   | C   | C   | C*08:02                         | C        | C        | C         |
| C*08:03                          | P                                        | C                                   | C     | C   | C   | C    | C    | C   | C   | C   | C*08:03                         | C        |          | C         |
| C*08:04                          | P                                        | C                                   | C     | C   | I   | I    | C    | C   | C   | C   | C*08:04                         | C        | WD       |           |
| C*08:05                          | P                                        | I                                   | WD    | WD  |     | WD   |      |     |     | I   | C*08:05                         | WD       |          |           |
| C*08:06                          | P                                        | C                                   | WD    |     | I   | WD   |      |     | C   | I   | C*08:06                         | WD       |          | WD        |
| C*08:07                          | P                                        | WD                                  | WD    |     |     |      |      |     |     |     | C*08:07                         |          |          |           |
| C*08:08                          | P                                        | I                                   | WD    |     |     | WD   |      | I   |     | I   | C*08:08                         |          |          |           |
| C*08:10                          | P                                        | C                                   | I     |     |     | WD   |      | C   | C   | I   | C*08:10                         | WD       |          | WD        |
| C*08:11                          | P                                        | I                                   | WD    |     |     | WD   |      | I   | WD  | WD  | C*08:11                         |          |          |           |
| C*08:12                          | P                                        | WD                                  | WD    |     |     | WD   |      |     |     | WD  | C*08:12                         | WD       | WD       |           |
| C*08:13                          | P                                        | I                                   | WD    | WD  |     |      |      | I   |     |     | C*08:13                         | WD       |          |           |
| C*08:15                          | P                                        | WD                                  | WD    |     |     | WD   |      |     |     | WD  | C*08:15                         |          | WD       |           |
| C*08:21                          | P                                        | o                                   | o     |     |     |      |      |     |     |     | C*08:21                         |          |          | WD        |
| C*08:23                          | P                                        | WD                                  | WD    |     |     | WD   |      |     |     |     | C*08:23                         |          |          |           |

Supplementary Table 3c. Comparison of HLA-C P group two-field assignments among CIWD catalogs <sup>a</sup>

|                                  |                                          | 3.0.0 CIWD                          |       |     |     |      |      |     |     |     | 2.0.0 CWD                       |          | EFI CWD  | China CWD |
|----------------------------------|------------------------------------------|-------------------------------------|-------|-----|-----|------|------|-----|-----|-----|---------------------------------|----------|----------|-----------|
|                                  |                                          | Category by Population <sup>b</sup> |       |     |     |      |      |     |     |     |                                 |          |          |           |
| HLA-C IPD-<br>HLA/IMGT<br>3.31.0 | Nomenclature<br>Designation <sup>a</sup> | Highest<br>Frequency                | Total | AFA | API | EURO | MENA | HIS | NAM | UNK | HLA-C IPD-<br>IMGT/HLA<br>3.9.0 | Category | Category | Category  |
| C*08:25                          | P                                        | WD                                  | WD    |     |     |      |      |     |     |     | C*08:25                         |          |          |           |
| C*08:27                          | P                                        | o                                   | o     |     |     |      |      |     |     |     | C*08:27                         |          |          | WD        |
| C*08:28                          | P                                        | WD                                  | WD    |     |     | WD   |      |     |     |     | C*08:28                         |          | WD       |           |
| C*08:30                          | P                                        | WD                                  | WD    |     |     | WD   |      |     |     | WD  | C*08:30                         |          |          |           |
| C*08:32                          | P                                        | WD                                  | WD    | WD  |     |      |      |     |     |     | C*08:32                         |          |          |           |
| C*08:33                          | P                                        | WD                                  | WD    |     |     | WD   |      |     |     |     | C*08:33                         |          | WD       |           |
| C*08:35                          | P                                        | I                                   | WD    |     |     |      |      | I   |     | WD  | C*08:35                         |          |          |           |
| C*08:41                          | P                                        | o                                   | o     |     |     |      |      |     |     |     | C*08:41                         |          |          | WD        |
| C*08:43                          | P                                        | WD                                  | WD    | WD  |     |      |      |     |     |     | C*08:43                         |          |          |           |
| C*08:44                          | P                                        | o                                   | o     |     |     |      |      |     |     |     | C*08:44                         |          |          | WD        |
| C*08:50                          | P                                        | WD                                  | WD    |     | WD  |      |      |     |     |     | C*08:50                         |          |          |           |
| C*08:51                          | P                                        | WD                                  | WD    |     |     | WD   |      |     |     |     | C*08:51                         |          |          |           |
| C*08:53                          | P                                        | WD                                  | WD    |     |     | WD   |      |     |     |     | C*08:53                         |          |          |           |
| C*08:54                          | P                                        | WD                                  | WD    |     |     |      |      |     |     |     | C*08:54                         |          |          |           |
| C*08:76                          | P                                        | WD                                  | WD    |     |     |      |      |     |     |     | C*08:76                         |          |          |           |
| C*08:92                          | P                                        | WD                                  | WD    |     |     | WD   |      |     |     |     | C*08:92                         |          |          |           |
| C*08:103                         | P                                        | WD                                  | WD    |     |     | WD   |      |     |     |     | C*08:103                        |          |          |           |
| C*08:127N                        | N                                        | WD                                  | WD    |     | WD  |      |      |     |     |     | C*08:127N                       |          |          |           |
| C*12:02                          | P                                        | C                                   | C     | C   | C   | C    | C    | C   | C   | C   | C*12:02                         | C        | C        | C         |
| C*12:03                          | P                                        | C                                   | C     | C   | C   | C    | C    | C   | C   | C   | C*12:03                         | C        | C        | C         |
| C*12:04                          | P                                        | C                                   | C     | WD  | C   | I    | WD   | I   | C   | C   | C*12:04                         | C        |          | WD        |
| C*12:05                          | P                                        | C                                   | C     | WD  | C   | I    | C    | I   |     | I   | C*12:05                         | WD       |          | WD        |
| C*12:06                          | P                                        | WD                                  | WD    |     |     | WD   |      |     |     |     | C*12:06                         |          |          |           |
| C*12:07                          | P                                        | WD                                  | WD    | WD  |     |      |      |     |     |     | C*12:07                         |          |          |           |
| C*12:08                          | P                                        | WD                                  | WD    |     |     |      |      |     |     |     | C*12:08                         |          |          |           |
| C*12:09                          | P                                        | C                                   | I     |     | C   | WD   | WD   |     |     | I   | C*12:09                         | WD       |          | WD        |
| C*12:11                          | P                                        | WD                                  | WD    |     |     | WD   |      |     |     |     | C*12:11                         |          |          |           |
| C*12:12                          | P                                        | C                                   | I     | WD  |     | WD   | WD   | C   | C   | I   | C*12:12                         | WD       |          |           |



Supplementary Table 3c. Comparison of HLA-C P group two-field assignments among CIWD catalogs <sup>a</sup>

|                                  |                                          | 3.0.0 CIWD                          |       |     |     |      |      |     |     |     | 2.0.0 CWD                       |          | EFI CWD  | China CWD |
|----------------------------------|------------------------------------------|-------------------------------------|-------|-----|-----|------|------|-----|-----|-----|---------------------------------|----------|----------|-----------|
|                                  |                                          | Category by Population <sup>b</sup> |       |     |     |      |      |     |     |     |                                 |          |          |           |
| HLA-C IPD-<br>HLA/IMGT<br>3.31.0 | Nomenclature<br>Designation <sup>a</sup> | Highest<br>Frequency                | Total | AFA | API | EURO | MENA | HIS | NAM | UNK | HLA-C IPD-<br>IMGT/HLA<br>3.9.0 | Category | Category | Category  |
| C*12:13                          | P                                        | I                                   | I     |     |     | I    |      |     |     | I   | C*12:13                         | WD       |          |           |
| C*12:14                          | P                                        | WD                                  | WD    |     |     | WD   |      |     |     |     | C*12:14                         |          |          |           |
| C*12:16                          | P                                        | I                                   | I     |     |     | I    |      |     |     | WD  | C*12:16                         | WD       |          |           |
| C*12:18                          | P                                        | I                                   | WD    |     | I   |      |      |     |     |     | C*12:18                         |          |          | WD        |
| C*12:19                          | P                                        | WD                                  | WD    | WD  |     |      |      |     |     |     | C*12:19                         |          |          |           |
| C*12:20                          | P                                        | WD                                  | WD    |     |     |      |      |     |     |     | C*12:20                         |          |          |           |
| C*12:21                          | P                                        | WD                                  | WD    |     |     | WD   |      |     |     |     | C*12:21                         |          |          |           |
| C*12:24                          | P                                        | WD                                  | WD    |     |     | WD   |      |     |     | WD  | C*12:24                         |          |          |           |
| C*12:27                          | P                                        | WD                                  | WD    |     |     |      | WD   |     |     |     | C*12:27                         |          |          |           |
| C*12:28                          | P                                        | WD                                  | WD    |     |     | WD   |      |     |     |     | C*12:28                         |          |          |           |
| C*12:30                          | P                                        | I                                   | I     |     |     | I    |      |     |     |     | C*12:30                         |          |          |           |
| C*12:33                          | P                                        | WD                                  | WD    |     |     | WD   |      |     |     |     | C*12:33                         |          |          |           |
| C*12:34                          | P                                        | I                                   | I     |     |     | I    |      |     |     | WD  | C*12:34                         |          |          |           |
| C*12:38                          | P                                        | I                                   | WD    |     | I   |      |      |     |     |     | C*12:38                         |          |          |           |
| C*12:40                          | P                                        | WD                                  | WD    |     | WD  |      |      |     |     |     | C*12:40                         |          |          |           |
| C*12:41                          | P                                        | I                                   | WD    |     | I   |      |      |     |     |     | C*12:41                         |          |          |           |
| C*12:42Q                         | Q                                        | WD                                  | WD    |     |     | WD   |      |     |     |     | C*12:42Q                        |          | WD       |           |
| C*12:43                          | P                                        | WD                                  | WD    |     |     | WD   |      |     |     |     | C*12:43                         |          |          |           |
| C*12:45                          | P                                        | WD                                  | WD    |     |     | WD   |      |     |     |     | C*12:45                         |          |          |           |
| C*12:47                          | P                                        | WD                                  | WD    |     |     | WD   |      |     |     | WD  | C*12:47                         |          |          |           |
| C*12:48                          | P                                        | WD                                  | WD    |     |     | WD   |      |     |     |     | C*12:48                         |          |          |           |
| C*12:54                          | P                                        | WD                                  | WD    |     | WD  | WD   |      |     |     |     | C*12:54                         |          |          |           |
| C*12:59                          | P                                        | WD                                  | WD    | WD  |     |      |      |     |     |     | C*12:59                         |          |          |           |
| C*12:60                          | P                                        | I                                   | WD    |     | I   |      |      |     |     |     | C*12:60                         |          |          |           |
| C*12:61                          | P                                        | WD                                  | WD    |     |     |      |      |     |     |     | C*12:61                         |          |          |           |
| C*12:62                          | P                                        | WD                                  | WD    |     |     | WD   |      |     |     |     | C*12:62                         |          |          |           |
| C*12:64                          | P                                        | WD                                  | WD    |     |     |      |      |     |     |     | C*12:64                         |          |          |           |
| C*12:67                          | P                                        | WD                                  | WD    |     |     | WD   |      |     |     |     | C*12:67                         |          |          |           |

Supplementary Table 3c. Comparison of HLA-C P group two-field assignments among CIWD catalogs <sup>a</sup>

|                                  |                                          | 3.0.0 CIWD                          |       |     |     |      |      |     |     |     | 2.0.0 CWD                       |          | EFI CWD  | China CWD |
|----------------------------------|------------------------------------------|-------------------------------------|-------|-----|-----|------|------|-----|-----|-----|---------------------------------|----------|----------|-----------|
|                                  |                                          | Category by Population <sup>b</sup> |       |     |     |      |      |     |     |     |                                 |          |          |           |
| HLA-C IPD-<br>HLA/IMGT<br>3.31.0 | Nomenclature<br>Designation <sup>a</sup> | Highest<br>Frequency                | Total | AFA | API | EURO | MENA | HIS | NAM | UNK | HLA-C IPD-<br>IMGT/HLA<br>3.9.0 | Category | Category | Category  |
| C*12:72                          | P                                        | I                                   | WD    |     | I   |      |      |     |     |     | C*12:72                         |          |          |           |
| C*12:78                          | P                                        | WD                                  | WD    |     |     |      |      |     |     |     | C*12:78                         |          |          |           |
| C*12:86                          | P                                        | WD                                  | WD    |     |     | WD   |      |     |     |     | C*12:86                         |          |          |           |
| C*12:90                          | P                                        | WD                                  | WD    |     |     | WD   |      |     |     |     | C*12:90                         |          |          |           |
| C*12:98                          | P                                        | WD                                  | WD    |     |     |      | WD   |     |     | WD  | C*12:98                         |          |          |           |
| C*12:99                          | P                                        | WD                                  | WD    |     |     | WD   |      |     |     |     | C*12:99                         |          |          |           |
| C*12:101                         | P                                        | I                                   | WD    |     | I   |      |      |     |     |     | C*12:101                        |          |          |           |
| C*12:136                         | P                                        | WD                                  | WD    |     | WD  |      |      |     |     |     | C*12:136                        |          |          |           |
| C*12:139                         | P                                        | WD                                  | WD    |     |     |      | WD   |     |     |     | C*12:139                        |          |          |           |
| C*12:149                         | P                                        | WD                                  | WD    |     |     |      |      |     |     |     | C*12:149                        |          |          |           |
| C*12:162                         | P                                        | WD                                  | WD    |     | WD  |      |      |     |     |     | C*12:162                        |          |          |           |
| C*14:02                          | P                                        | C                                   | C     | C   | C   | C    | C    | C   | C   | C   | C*14:02                         | C        | C        | C         |
| C*14:03                          | P                                        | C                                   | C     | C   | C   | C    | C    | C   | C   | C   | C*14:03                         | C        | C        | C         |
| C*14:04                          | P                                        | I                                   | I     | WD  |     | I    |      |     |     | I   | C*14:04                         | WD       | WD       |           |
| C*14:05                          | P                                        | I                                   | I     |     |     | I    |      |     |     | WD  | C*14:05                         | WD       | WD       |           |
| C*14:06                          | P                                        | I                                   | WD    | WD  |     | WD   |      | I   |     | WD  | C*14:06                         |          |          |           |
| C*14:10                          | P                                        | WD                                  | WD    | WD  |     |      |      |     |     |     | C*14:10                         |          |          |           |
| C*14:12                          | P                                        | I                                   | WD    |     | I   |      |      |     |     |     | C*14:12                         |          |          | WD        |
| C*14:18                          | P                                        | WD                                  | WD    |     |     | WD   |      |     |     |     | C*14:18                         |          | WD       |           |
| C*14:24                          | P                                        | I                                   | WD    |     | I   |      |      |     |     |     | C*14:24                         |          |          | WD        |
| C*14:25                          | P                                        | WD                                  | WD    |     |     | WD   |      |     |     |     | C*14:25                         |          | WD       | WD        |
| C*14:29                          | P                                        | WD                                  | WD    |     | WD  |      |      |     |     |     | C*14:29                         |          |          | WD        |
| C*14:32                          | P                                        | WD                                  | WD    |     |     | WD   |      |     |     |     | C*14:32                         |          | WD       |           |
| C*14:41                          | P                                        | WD                                  | WD    |     |     | WD   |      |     |     |     | C*14:41                         |          | WD       |           |
| C*14:50                          | P                                        | WD                                  | WD    |     |     | WD   |      |     |     |     | C*14:50                         |          |          |           |
| C*14:66                          | P                                        | I                                   | WD    |     |     |      |      | I   |     |     | C*14:66                         |          |          |           |
| C*14:67                          | P                                        | WD                                  | WD    |     |     |      |      |     |     |     | C*14:67                         |          |          |           |
| C*15:02                          | P                                        | C                                   | C     | C   | C   | C    | C    | C   | C   | C   | C*15:02                         | C        | C        | C         |

Supplementary Table 3c. Comparison of HLA-C P group two-field assignments among CIWD catalogs <sup>a</sup>

|                                  |                                          | 3.0.0 CIWD                          |       |     |     |      |      |     |     |     | 2.0.0 CWD                       |          | EFI CWD  | China CWD |
|----------------------------------|------------------------------------------|-------------------------------------|-------|-----|-----|------|------|-----|-----|-----|---------------------------------|----------|----------|-----------|
|                                  |                                          | Category by Population <sup>b</sup> |       |     |     |      |      |     |     |     |                                 |          |          |           |
| HLA-C IPD-<br>HLA/IMGT<br>3.31.0 | Nomenclature<br>Designation <sup>a</sup> | Highest<br>Frequency                | Total | AFA | API | EURO | MENA | HIS | NAM | UNK | HLA-C IPD-<br>IMGT/HLA<br>3.9.0 | Category | Category | Category  |
| C*15:03                          | P                                        | I                                   | WD    |     |     | WD   |      | I   |     | I   | C*15:03                         | WD       |          |           |
| C*15:04                          | P                                        | C                                   | C     | WD  | C   | C    | C    | C   | C   | C   | C*15:04                         | C        | WD       | WD        |
| C*15:05                          | P                                        | C                                   | C     | C   | C   | C    | C    | C   | C   | C   | C*15:05                         | C        | C        | C         |
| C*15:06                          | P                                        | C                                   | C     | WD  | I   | C    | C    | C   | C   | C   | C*15:06                         | C        | C        | WD        |
| C*15:07                          | P                                        | C                                   | C     |     | C   | WD   | WD   |     |     | I   | C*15:07                         | WD       | WD       | WD        |
| C*15:08                          | P                                        | I                                   | WD    |     | I   | WD   |      | I   |     | I   | C*15:08                         | WD       | WD       |           |
| C*15:09                          | P                                        | C                                   | C     | WD  | I   | I    | C    | C   | C   | C   | C*15:09                         | C        | C        | WD        |
| C*15:10                          | P                                        | I                                   | WD    |     | I   | WD   |      |     |     |     | C*15:10                         |          | WD       |           |
| C*15:11                          | P                                        | I                                   | I     | WD  | I   | I    | WD   | I   |     | I   | C*15:11                         | WD       | C        | WD        |
| C*15:12                          | P                                        | o                                   | o     |     |     |      |      |     |     |     | C*15:12                         |          |          | WD        |
| C*15:15                          | P                                        | WD                                  | WD    |     |     | WD   |      |     |     |     | C*15:15                         |          | WD       |           |
| C*15:16                          | P                                        | I                                   | WD    |     |     | WD   |      | I   |     | I   | C*15:16                         |          |          |           |
| C*15:17                          | P                                        | I                                   | WD    |     |     | WD   |      | I   |     |     | C*15:17                         |          | WD       | WD        |
| C*15:21                          | P                                        | o                                   | o     |     |     |      |      |     |     |     | C*15:21                         |          |          | WD        |
| C*15:22                          | P                                        | C                                   | WD    | C   |     |      |      |     |     | WD  | C*15:22                         | WD       |          |           |
| C*15:23                          | P                                        | WD                                  | WD    |     |     | WD   |      |     |     |     | C*15:23                         |          | WD       |           |
| C*15:24                          | P                                        | WD                                  | WD    |     |     | WD   |      |     |     |     | C*15:24                         |          | WD       |           |
| C*15:25                          | P                                        | WD                                  | WD    | WD  |     |      | WD   |     |     |     | C*15:25                         |          |          |           |
| C*15:26                          | P                                        | WD                                  | WD    |     | WD  |      |      |     |     |     | C*15:26                         |          |          | WD        |
| C*15:27                          | P                                        | I                                   | WD    |     |     |      |      | I   |     |     | C*15:27                         |          |          |           |
| C*15:30                          | P                                        | WD                                  | WD    |     |     | WD   | WD   |     |     |     | C*15:30                         |          | WD       |           |
| C*15:32Q                         | Q                                        | I                                   | WD    |     | I   |      |      |     |     |     | C*15:32Q                        |          |          |           |
| C*15:38                          | P                                        | WD                                  | WD    |     |     | WD   |      |     |     |     | C*15:38                         |          |          |           |
| C*15:40                          | P                                        | WD                                  | WD    |     | WD  |      |      |     |     |     | C*15:40                         |          |          |           |
| C*15:42                          | P                                        | I                                   | WD    |     | I   |      |      |     |     |     | C*15:42                         |          |          |           |
| C*15:44                          | P                                        | WD                                  | WD    |     |     | WD   |      |     |     |     | C*15:44                         |          |          |           |
| C*15:52                          | P                                        | WD                                  | WD    |     |     |      |      |     |     | WD  | C*15:52                         |          |          |           |
| C*15:56                          | P                                        | o                                   | o     |     |     |      |      |     |     |     | C*15:56                         |          | WD       |           |

Supplementary Table 3c. Comparison of HLA-C P group two-field assignments among CIWD catalogs <sup>a</sup>

|                                  |                                          | 3.0.0 CIWD                          |       |     |     |      |      |     |     |     | 2.0.0 CWD                       |          | EFI CWD  | China CWD |
|----------------------------------|------------------------------------------|-------------------------------------|-------|-----|-----|------|------|-----|-----|-----|---------------------------------|----------|----------|-----------|
|                                  |                                          | Category by Population <sup>b</sup> |       |     |     |      |      |     |     |     |                                 |          |          |           |
| HLA-C IPD-<br>HLA/IMGT<br>3.31.0 | Nomenclature<br>Designation <sup>a</sup> | Highest<br>Frequency                | Total | AFA | API | EURO | MENA | HIS | NAM | UNK | HLA-C IPD-<br>IMGT/HLA<br>3.9.0 | Category | Category | Category  |
| C*15:57                          | P                                        | WD                                  | WD    |     | WD  |      |      |     |     |     | C*15:57                         |          |          |           |
| C*15:58                          | P                                        | I                                   | WD    |     | I   |      |      |     |     |     | C*15:58                         |          |          |           |
| C*15:68                          | P                                        | WD                                  | WD    |     | WD  |      |      |     |     |     | C*15:68                         |          |          |           |
| C*15:72                          | P                                        | WD                                  | WD    |     |     |      |      |     |     |     | C*15:72                         |          |          |           |
| C*15:85                          | P                                        | WD                                  | WD    |     |     |      |      |     |     |     | C*15:85                         |          |          |           |
| C*15:102                         | P                                        | WD                                  | WD    |     |     |      |      |     |     | WD  | C*15:102                        |          |          |           |
| C*15:122N                        | N                                        | WD                                  | WD    |     |     |      |      |     |     |     | C*15:122N                       |          |          |           |
| C*15:124                         | P                                        | WD                                  | WD    |     | WD  |      |      |     |     |     | C*15:124                        |          |          |           |
| C*16:01                          | P                                        | C                                   | C     | C   | C   | C    | C    | C   | C   | C   | C*16:01                         | C        | C        | WD        |
| C*16:02                          | P                                        | C                                   | C     | C   | C   | C    | C    | C   | C   | C   | C*16:02                         | C        | C        | C         |
| C*16:04                          | P                                        | C                                   | C     | C   | C   | C    | C    | C   | C   | C   | C*16:04                         | C        | C        | WD        |
| C*16:07                          | P                                        | WD                                  | WD    | WD  |     | WD   |      |     |     |     | C*16:07                         |          |          |           |
| C*16:08                          | P                                        | WD                                  | WD    | WD  |     |      |      |     |     |     | C*16:08                         |          |          |           |
| C*16:09                          | P                                        | I                                   | WD    |     |     |      |      | I   |     |     | C*16:09                         |          |          |           |
| C*16:12                          | P                                        | I                                   | WD    |     | I   |      |      |     |     |     | C*16:12                         |          |          |           |
| C*16:13                          | P                                        | WD                                  | WD    |     |     | WD   |      |     |     |     | C*16:13                         |          | WD       |           |
| C*16:14                          | P                                        | WD                                  | WD    |     |     | WD   |      |     |     |     | C*16:14                         |          | WD       |           |
| C*16:15                          | P                                        | C                                   | WD    |     |     | WD   | C    |     |     | WD  | C*16:15                         |          | WD       |           |
| C*16:16Q                         | Q                                        | WD                                  | WD    |     |     | WD   |      |     |     |     | C*16:16Q                        |          | WD       |           |
| C*16:18                          | P                                        | WD                                  | WD    |     |     | WD   |      |     |     |     | C*16:18                         |          | WD       |           |
| C*16:19                          | P                                        | I                                   | WD    |     | I   |      |      |     |     |     | C*16:19                         |          |          |           |
| C*16:21                          | P                                        | WD                                  | WD    |     |     | WD   |      |     |     |     | C*16:21                         |          | WD       |           |
| C*16:22                          | P                                        | WD                                  | WD    | WD  |     |      |      |     |     |     | C*16:22                         |          |          |           |
| C*16:24                          | P                                        | WD                                  | WD    |     |     |      |      |     |     |     | C*16:24                         |          |          |           |
| C*16:25                          | P                                        | WD                                  | WD    | WD  |     | WD   |      |     |     |     | C*16:25                         |          |          |           |
| C*16:26                          | P                                        | WD                                  | WD    |     |     | WD   |      |     |     |     | C*16:26                         |          |          |           |
| C*16:30N                         | N                                        | I                                   | WD    |     | I   |      |      |     |     |     | C*16:30N                        |          |          |           |
| C*16:33                          | P                                        | WD                                  | WD    |     |     |      |      |     |     | WD  | C*16:33                         |          |          |           |

Supplementary Table 3c. Comparison of HLA-C P group two-field assignments among CIWD catalogs <sup>a</sup>

|                                  |                                          | 3.0.0 CIWD                          |       |     |     |      |      |     |     |     | 2.0.0 CWD                       |          | EFI CWD  | China CWD |
|----------------------------------|------------------------------------------|-------------------------------------|-------|-----|-----|------|------|-----|-----|-----|---------------------------------|----------|----------|-----------|
|                                  |                                          | Category by Population <sup>b</sup> |       |     |     |      |      |     |     |     |                                 |          |          |           |
| HLA-C IPD-<br>HLA/IMGT<br>3.31.0 | Nomenclature<br>Designation <sup>a</sup> | Highest<br>Frequency                | Total | AFA | API | EURO | MENA | HIS | NAM | UNK | HLA-C IPD-<br>IMGT/HLA<br>3.9.0 | Category | Category | Category  |
| C*16:37                          | P                                        | WD                                  | WD    |     |     |      |      |     |     | WD  | C*16:37                         |          |          |           |
| C*16:38                          | P                                        | WD                                  | WD    |     |     | WD   |      |     |     | WD  | C*16:38                         |          |          |           |
| C*16:46                          | P                                        | WD                                  | WD    | WD  |     |      | WD   |     |     |     | C*16:46                         |          |          |           |
| C*16:50                          | P                                        | WD                                  | WD    | WD  |     |      |      |     |     | WD  | C*16:50                         |          |          |           |
| C*16:52                          | P                                        | WD                                  | WD    |     |     | WD   |      |     |     |     | C*16:52                         |          |          |           |
| C*16:74                          | P                                        | WD                                  | WD    |     |     | WD   |      |     |     |     | C*16:74                         |          |          |           |
| C*16:88                          | P                                        | WD                                  | WD    |     | WD  |      |      |     |     |     | C*16:88                         |          |          |           |
| C*17:01                          | P                                        | C                                   | C     | C   | C   | C    | C    | C   | C   | C   | C*17:01                         | C        | C        | C         |
| C*17:04                          | P                                        | I                                   | WD    | WD  |     |      |      |     |     | I   | C*17:04                         |          |          |           |
| C*17:07                          | P                                        | WD                                  | WD    |     |     | WD   |      |     |     |     | C*17:07                         |          | WD       |           |
| C*17:23                          | P                                        | WD                                  | WD    |     |     |      |      |     |     |     | C*17:23                         |          |          |           |
| C*18:01                          | P                                        | C                                   | C     | C   | I   | C    | C    | C   | C   | C   | C*18:01                         | C        | WD       | WD        |
| C*18:03                          | P                                        | WD                                  | WD    | WD  |     |      |      |     |     | WD  | C*18:03                         |          |          |           |
| C*18:04                          | P                                        | WD                                  | WD    | WD  |     |      |      |     |     |     | C*18:04                         |          |          |           |
| C*18:06                          | P                                        | WD                                  | WD    | WD  |     |      |      |     |     |     | C*18:06                         |          |          |           |

C, common; I, intermediate; WD, well-documented

<sup>a</sup> Alleles observed at least five times in any population group in the current dataset are included in this table. The exception are alleles that were observed in previous catalogs but that are not present or are observed less than five times. Note that this two-field designation is the equivalent of a "P" assignment so that alleles within a P group that encode proteins that differ outside of the antigen recognition domain are not listed separately (e.g., C\*02:10 is within the C\*02:02P two-field assignment and is not listed in this table even though it was categorized as common in 2.0.0 CWD). The table does not list all alleles from IPD-IMGT/HLA version 3.31.0.

<sup>b</sup> Population groups include: AFA (African/African American), API (Asian/Pacific Islander), EURO (European/European descent), MENA (Middle East/North Coast of Africa), HIS (Hispanic), NAM (Native American) and UNK (unknown, multiple ancestries or other). Total is the overall population i.e., all groups combined. Highest frequency is the highest CIWD designation among all the individual groups.

<sup>c</sup> Not-CIWD, o.

Supplementary Table 3d. Comparison of HLA-DRB1 P group two-field assignments among CIWD catalogs <sup>a</sup>

|                                  |                                          | 3.0.0 CIWD                          |       |     |     |      |      |     |     |     | 2.0.0 CWD                       |          | EFI CWD  | China CWD |
|----------------------------------|------------------------------------------|-------------------------------------|-------|-----|-----|------|------|-----|-----|-----|---------------------------------|----------|----------|-----------|
|                                  |                                          | Category by Population <sup>b</sup> |       |     |     |      |      |     |     |     |                                 |          |          |           |
| HLA-DRB1 IPD-<br>HLA/IMGT 3.31.0 | Nomenclature<br>Designation <sup>a</sup> | Highest<br>Frequency                | Total | AFA | API | EURO | MENA | HIS | NAM | UNK | HLA-DRB1 IPD-<br>IMGT/HLA 3.9.0 | Category | Category | Category  |
| DRB1*01:01                       | P                                        | C                                   | C     | C   | C   | C    | C    | C   | C   | C   | DRB1*01:01                      | C        | C        | C         |
| DRB1*01:02                       | P                                        | C                                   | C     | C   | C   | C    | C    | C   | C   | C   | DRB1*01:02                      | C        | C        | C         |
| DRB1*01:03                       | P                                        | C                                   | C     | C   | C   | C    | C    | C   | C   | C   | DRB1*01:03                      | C        | C        |           |
| DRB1*01:04                       | P                                        | WD                                  | WD    |     |     |      |      |     |     |     | DRB1*01:04                      | WD       | WD       |           |
| DRB1*01:06                       | P                                        | o <sup>c</sup>                      | o     |     |     |      |      |     |     |     | DRB1*01:06                      |          | WD       |           |
| DRB1*01:07                       | P                                        | I                                   | I     |     |     | I    |      |     |     | WD  | DRB1*01:07                      | WD       | WD       |           |
| DRB1*01:08                       | P                                        | o                                   | o     |     |     |      |      |     |     |     | DRB1*01:08                      |          | WD       |           |
| DRB1*01:09                       | P                                        | o                                   | o     |     |     |      |      |     |     |     | DRB1*01:09                      |          | WD       |           |
| DRB1*01:10                       | P                                        | WD                                  | WD    |     |     | WD   |      |     |     |     | DRB1*01:10                      |          | WD       |           |
| DRB1*01:11                       | P                                        | WD                                  | WD    |     |     | WD   |      |     |     |     | DRB1*01:11                      | WD       | WD       |           |
| DRB1*01:14                       | P                                        | o                                   | o     |     |     |      |      |     |     |     | DRB1*01:14                      |          |          | WD        |
| DRB1*01:16                       | P                                        | WD                                  | WD    |     |     | WD   |      |     |     |     | DRB1*01:16                      |          |          |           |
| DRB1*01:18                       | P                                        | WD                                  | WD    |     |     | WD   |      |     |     |     | DRB1*01:18                      |          | WD       |           |
| DRB1*01:20                       | P                                        | WD                                  | WD    |     |     | WD   |      |     |     |     | DRB1*01:20                      |          | WD       |           |
| DRB1*01:22                       | P                                        | WD                                  | WD    |     |     | WD   |      |     |     |     | DRB1*01:22                      |          | WD       |           |
| DRB1*01:24                       | P                                        | WD                                  | WD    |     |     | WD   |      |     |     |     | DRB1*01:24                      |          | WD       |           |
| DRB1*01:26                       | P                                        | WD                                  | WD    | WD  |     |      |      |     |     |     | DRB1*01:26                      |          |          |           |
| DRB1*01:27                       | P                                        | WD                                  | WD    |     |     | WD   |      |     |     |     | DRB1*01:27                      |          | WD       |           |
| DRB1*01:29                       | P                                        | WD                                  | WD    |     |     | WD   |      |     |     |     | DRB1*01:29                      |          | WD       |           |
| DRB1*03:01                       | P                                        | C                                   | C     | C   | C   | C    | C    | C   | C   | C   | DRB1*03:01                      | C        | C        | C         |
| DRB1*03:02                       | P                                        | C                                   | C     | C   | C   | C    | C    | C   | C   | C   | DRB1*03:02                      | C        | C        |           |
| DRB1*03:03                       | P                                        | WD                                  | WD    | WD  |     |      |      |     |     | WD  | DRB1*03:03                      | WD       |          |           |
| DRB1*03:04                       | P                                        | C                                   | C     |     | WD  | C    |      | I   |     | I   | DRB1*03:04                      | WD       | WD       |           |
| DRB1*03:05                       | P                                        | I                                   | I     | WD  | I   | I    |      |     |     | I   | DRB1*03:05                      | WD       |          | WD        |
| DRB1*03:06                       | P                                        | I                                   | I     | WD  | I   | I    |      |     |     | WD  | DRB1*03:06                      | WD       |          | WD        |
| DRB1*03:07                       | P                                        | I                                   | WD    |     |     | WD   | WD   | I   |     | WD  | DRB1*03:07                      | WD       |          |           |
| DRB1*03:08                       | P                                        | WD                                  | WD    |     |     | WD   |      |     |     |     | DRB1*03:08                      |          |          | WD        |
| DRB1*03:11                       | P                                        | WD                                  | WD    |     |     | WD   |      |     |     |     | DRB1*03:11                      |          |          | WD        |

Supplementary Table 3d. Comparison of HLA-DRB1 P group two-field assignments among CIWD catalogs <sup>a</sup>

|                                  |                                          | 3.0.0 CIWD                          |       |     |     |      |      |     |     |     | 2.0.0 CWD                       |          | EFI CWD  | China CWD |
|----------------------------------|------------------------------------------|-------------------------------------|-------|-----|-----|------|------|-----|-----|-----|---------------------------------|----------|----------|-----------|
|                                  |                                          | Category by Population <sup>b</sup> |       |     |     |      |      |     |     |     |                                 |          |          |           |
| HLA-DRB1 IPD-<br>HLA/IMGT 3.31.0 | Nomenclature<br>Designation <sup>a</sup> | Highest<br>Frequency                | Total | AFA | API | EURO | MENA | HIS | NAM | UNK | HLA-DRB1 IPD-<br>IMGT/HLA 3.9.0 | Category | Category | Category  |
| DRB1*03:13                       | P                                        | I                                   | WD    |     |     | I    |      |     |     | WD  | DRB1*03:13                      |          |          |           |
| DRB1*03:15                       | P                                        | C                                   | I     | WD  | WD  | I    |      | C   | C   | I   | DRB1*03:15                      | WD       |          |           |
| DRB1*03:16                       | P                                        | I                                   | WD    |     |     | WD   |      | I   |     |     | DRB1*03:16                      | WD       |          |           |
| DRB1*03:17                       | P                                        | WD                                  | WD    |     |     | WD   |      |     |     |     | DRB1*03:17                      |          |          |           |
| DRB1*03:19                       | P                                        | WD                                  | WD    |     |     | WD   |      |     |     |     | DRB1*03:19                      |          |          |           |
| DRB1*03:22                       | P                                        | WD                                  | WD    |     |     | WD   |      |     |     |     | DRB1*03:22                      | WD       |          |           |
| DRB1*03:23                       | P                                        | I                                   | I     |     |     | I    |      |     |     | WD  | DRB1*03:23                      | WD       |          |           |
| DRB1*03:24                       | P                                        | WD                                  | WD    |     |     | WD   |      |     |     |     | DRB1*03:24                      |          |          |           |
| DRB1*03:25                       | P                                        | WD                                  | WD    |     |     | WD   |      |     |     |     | DRB1*03:25                      |          |          |           |
| DRB1*03:27                       | P                                        | WD                                  | WD    |     |     |      |      |     |     |     | DRB1*03:27                      |          |          | WD        |
| DRB1*03:29                       | P                                        | WD                                  | WD    | WD  |     |      |      |     |     |     | DRB1*03:29                      |          |          |           |
| DRB1*03:30                       | P                                        | WD                                  | WD    |     |     | WD   |      |     |     |     | DRB1*03:30                      |          |          |           |
| DRB1*03:36                       | P                                        | WD                                  | WD    |     |     | WD   |      |     |     |     | DRB1*03:36                      |          |          |           |
| DRB1*03:37                       | P                                        | I                                   | WD    |     | WD  | WD   |      |     |     | I   | DRB1*03:37                      |          |          |           |
| DRB1*03:39                       | P                                        | WD                                  | WD    |     |     | WD   |      |     |     |     | DRB1*03:39                      |          |          |           |
| DRB1*03:42                       | P                                        | WD                                  | WD    |     |     | WD   |      |     |     |     | DRB1*03:42                      |          |          |           |
| DRB1*03:43                       | P                                        | WD                                  | WD    |     |     | WD   |      |     |     |     | DRB1*03:43                      |          |          |           |
| DRB1*03:44                       | P                                        | WD                                  | WD    |     |     | WD   |      |     |     |     | DRB1*03:44                      |          |          |           |
| DRB1*03:47                       | P                                        | WD                                  | WD    |     |     | WD   |      |     |     |     | DRB1*03:47                      |          |          |           |
| DRB1*03:58                       | P                                        | WD                                  | WD    |     |     | WD   |      |     |     |     | DRB1*03:58                      |          |          |           |
| DRB1*03:69                       | P                                        | WD                                  | WD    |     |     | WD   |      |     |     |     | DRB1*03:69                      |          |          |           |
| DRB1*03:72                       | P                                        | o                                   | o     |     |     |      |      |     |     |     | DRB1*03:72                      |          | WD       |           |
| DRB1*03:73                       | P                                        | WD                                  | WD    |     |     | WD   |      |     |     |     | DRB1*03:73                      |          |          |           |
| DRB1*03:76                       | P                                        | WD                                  | WD    |     |     | WD   |      |     |     |     | DRB1*03:76                      |          | WD       |           |
| DRB1*03:84                       | P                                        | WD                                  | WD    |     |     | WD   |      |     |     |     | DRB1*03:84                      |          |          |           |
| DRB1*03:93                       | P                                        | WD                                  | WD    |     |     | WD   |      |     |     |     | DRB1*03:93                      |          |          |           |
| DRB1*03:100                      | P                                        | WD                                  | WD    |     |     | WD   |      |     |     |     | DRB1*03:100                     |          |          |           |
| DRB1*04:01                       | P                                        | C                                   | C     | C   | C   | C    | C    | C   | C   | C   | DRB1*04:01                      | C        | C        | C         |

Supplementary Table 3d. Comparison of HLA-DRB1 P group two-field assignments among CIWD catalogs <sup>a</sup>

|                                  |                                          | 3.0.0 CIWD                          |       |     |     |      |      |     |     |     | 2.0.0 CWD                       |          | EFI CWD  | China CWD |
|----------------------------------|------------------------------------------|-------------------------------------|-------|-----|-----|------|------|-----|-----|-----|---------------------------------|----------|----------|-----------|
|                                  |                                          | Category by Population <sup>b</sup> |       |     |     |      |      |     |     |     |                                 |          |          |           |
| HLA-DRB1 IPD-<br>HLA/IMGT 3.31.0 | Nomenclature<br>Designation <sup>a</sup> | Highest<br>Frequency                | Total | AFA | API | EURO | MENA | HIS | NAM | UNK | HLA-DRB1 IPD-<br>IMGT/HLA 3.9.0 | Category | Category | Category  |
| DRB1*04:02                       | P                                        | C                                   | C     | C   | C   | C    | C    | C   | C   | C   | DRB1*04:02                      | C        | C        | C         |
| DRB1*04:03                       | P                                        | C                                   | C     | C   | C   | C    | C    | C   | C   | C   | DRB1*04:03                      | C        | C        | C         |
| DRB1*04:04                       | P                                        | C                                   | C     | C   | C   | C    | C    | C   | C   | C   | DRB1*04:04                      | C        | C        | C         |
| DRB1*04:05                       | P                                        | C                                   | C     | C   | C   | C    | C    | C   | C   | C   | DRB1*04:05                      | C        | C        | C         |
| DRB1*04:06                       | P                                        | C                                   | C     | C   | C   | C    | C    | C   | C   | C   | DRB1*04:06                      | C        | C        | C         |
| DRB1*04:07                       | P                                        | C                                   | C     | C   | C   | C    | C    | C   | C   | C   | DRB1*04:07                      | C        | C        | C         |
| DRB1*04:08                       | P                                        | C                                   | C     | C   | C   | C    | C    | C   | C   | C   | DRB1*04:08                      | C        | C        | C         |
| DRB1*04:09                       | P                                        | I                                   | I     | WD  | I   | I    |      | I   |     | I   | DRB1*04:09                      | C        | WD       |           |
| DRB1*04:10                       | P                                        | C                                   | C     | C   | C   | I    | C    | C   | C   | C   | DRB1*04:10                      | C        | WD       | C         |
| DRB1*04:11                       | P                                        | C                                   | C     | C   | C   | C    | WD   | C   | C   | C   | DRB1*04:11                      | C        | WD       | WD        |
| DRB1*04:12                       | P                                        | o                                   | o     |     |     |      |      |     |     |     | DRB1*04:12                      | WD       |          |           |
| DRB1*04:13                       | P                                        | C                                   | I     |     | I   | I    | C    |     |     | I   | DRB1*04:13                      | WD       | WD       | WD        |
| DRB1*04:14                       | P                                        | I                                   | I     |     |     | I    |      |     |     | I   | DRB1*04:14                      | WD       | WD       |           |
| DRB1*04:15                       | P                                        | WD                                  | WD    |     |     | WD   |      |     |     | WD  | DRB1*04:15                      | WD       | WD       |           |
| DRB1*04:16                       | P                                        | WD                                  | WD    |     |     | WD   |      |     |     |     | DRB1*04:16                      | WD       |          |           |
| DRB1*04:17                       | P                                        | C                                   | I     | WD  |     | WD   |      | C   | C   | I   | DRB1*04:17                      | C        |          | WD        |
| DRB1*04:18                       | P                                        | C                                   | I     |     | C   |      |      |     |     | WD  | DRB1*04:18                      | WD       |          |           |
| DRB1*04:19                       | P                                        | I                                   | WD    |     |     | WD   |      | I   |     |     | DRB1*04:19                      | WD       |          |           |
| DRB1*04:21                       | P                                        | WD                                  | WD    |     |     | WD   |      |     |     |     | DRB1*04:21                      |          | WD       |           |
| DRB1*04:22                       | P                                        | o                                   | o     |     |     |      |      |     |     |     | DRB1*04:22                      | WD       |          |           |
| DRB1*04:23                       | P                                        | I                                   | WD    |     |     | WD   |      | I   |     |     | DRB1*04:23                      | WD       |          |           |
| DRB1*04:25                       | P                                        | I                                   | WD    |     |     |      |      | I   |     |     | DRB1*04:25                      | WD       |          |           |
| DRB1*04:26                       | P                                        | I                                   | WD    |     |     | WD   |      |     |     | I   | DRB1*04:26                      | WD       | WD       |           |
| DRB1*04:27                       | P                                        | WD                                  | WD    |     |     |      |      |     |     |     | DRB1*04:27                      |          |          |           |
| DRB1*04:31                       | P                                        | WD                                  | WD    |     |     | WD   |      |     |     |     | DRB1*04:31                      |          | WD       |           |
| DRB1*04:32                       | P                                        | o                                   | o     |     |     |      |      |     |     |     | DRB1*04:32                      |          | WD       |           |
| DRB1*04:33                       | P                                        | WD                                  | WD    |     |     | WD   |      |     |     |     | DRB1*04:33                      | WD       |          |           |
| DRB1*04:34                       | P                                        | WD                                  | WD    |     |     | WD   |      |     |     |     | DRB1*04:34                      |          | WD       |           |



Supplementary Table 3d. Comparison of HLA-DRB1 P group two-field assignments among CIWD catalogs <sup>a</sup>

|                                  |                                          | 3.0.0 CIWD                          |       |     |     |      |      |     |     |     | 2.0.0 CWD                       |          | EFI CWD  | China CWD |
|----------------------------------|------------------------------------------|-------------------------------------|-------|-----|-----|------|------|-----|-----|-----|---------------------------------|----------|----------|-----------|
|                                  |                                          | Category by Population <sup>b</sup> |       |     |     |      |      |     |     |     |                                 |          |          |           |
| HLA-DRB1 IPD-<br>HLA/IMGT 3.31.0 | Nomenclature<br>Designation <sup>a</sup> | Highest<br>Frequency                | Total | AFA | API | EURO | MENA | HIS | NAM | UNK | HLA-DRB1 IPD-<br>IMGT/HLA 3.9.0 | Category | Category | Category  |
| DRB1*04:35                       | P                                        | WD                                  | WD    |     |     | WD   |      |     |     | WD  | DRB1*04:35                      | WD       | WD       |           |
| DRB1*04:36                       | P                                        | WD                                  | WD    |     | WD  |      |      |     |     |     | DRB1*04:36                      |          |          |           |
| DRB1*04:37                       | P                                        | I                                   | WD    |     |     | WD   |      | I   |     | WD  | DRB1*04:37                      |          | WD       |           |
| DRB1*04:38                       | P                                        | I                                   | I     |     |     | I    |      | WD  |     | I   | DRB1*04:38                      | C        | WD       | WD        |
| DRB1*04:39                       | P                                        | WD                                  | WD    |     |     | WD   |      |     |     |     | DRB1*04:39                      |          |          |           |
| DRB1*04:40                       | P                                        | WD                                  | WD    |     |     | WD   |      |     |     | WD  | DRB1*04:40                      | WD       |          |           |
| DRB1*04:41                       | P                                        | I                                   | WD    |     | I   |      |      |     |     | I   | DRB1*04:41                      | WD       |          |           |
| DRB1*04:42                       | P                                        | WD                                  | WD    |     | WD  | WD   |      |     |     |     | DRB1*04:42                      |          |          |           |
| DRB1*04:43                       | P                                        | WD                                  | WD    |     |     | WD   |      |     |     |     | DRB1*04:43                      |          |          |           |
| DRB1*04:44                       | P                                        | WD                                  | WD    |     |     | WD   |      |     |     |     | DRB1*04:44                      |          | WD       |           |
| DRB1*04:50                       | P                                        | I                                   | WD    |     |     | I    |      |     |     | WD  | DRB1*04:50                      | WD       | WD       |           |
| DRB1*04:51                       | P                                        | WD                                  | WD    |     | WD  |      |      |     |     |     | DRB1*04:51                      | WD       |          |           |
| DRB1*04:54                       | P                                        | I                                   | WD    |     |     |      |      | I   |     |     | DRB1*04:54                      | WD       |          |           |
| DRB1*04:56                       | P                                        | WD                                  | WD    |     | WD  | WD   |      |     |     |     | DRB1*04:56                      |          | WD       |           |
| DRB1*04:59                       | P                                        | WD                                  | WD    |     |     | WD   |      |     |     |     | DRB1*04:59                      |          |          | WD        |
| DRB1*04:60                       | P                                        | WD                                  | WD    |     |     | WD   |      |     |     |     | DRB1*04:60                      |          | WD       |           |
| DRB1*04:62                       | P                                        | I                                   | WD    |     | I   |      |      |     |     |     | DRB1*04:62                      |          |          |           |
| DRB1*04:64                       | P                                        | WD                                  | WD    |     |     | WD   |      |     |     |     | DRB1*04:64                      |          | WD       |           |
| DRB1*04:68                       | P                                        | WD                                  | WD    |     |     |      |      | WD  |     |     | DRB1*04:68                      |          |          |           |
| DRB1*04:70                       | P                                        | WD                                  | WD    |     |     | WD   |      |     |     |     | DRB1*04:70                      |          | WD       |           |
| DRB1*04:71                       | P                                        | WD                                  | WD    |     |     | WD   |      |     |     |     | DRB1*04:71                      |          | WD       |           |
| DRB1*04:72                       | P                                        | WD                                  | WD    |     |     | WD   |      |     |     | WD  | DRB1*04:72                      |          |          |           |
| DRB1*04:76                       | P                                        | WD                                  | WD    |     |     | WD   |      |     |     |     | DRB1*04:76                      |          |          |           |
| DRB1*04:79                       | P                                        | WD                                  | WD    |     |     |      |      | WD  |     |     | DRB1*04:79                      |          |          |           |
| DRB1*04:83                       | P                                        | WD                                  | WD    |     |     | WD   |      |     |     |     | DRB1*04:83                      |          | WD       |           |
| DRB1*04:88                       | P                                        | I                                   | WD    |     | I   | WD   |      |     |     |     | DRB1*04:88                      |          | WD       | WD        |
| DRB1*04:93                       | P                                        | o                                   | o     |     |     |      |      |     |     |     | DRB1*04:93                      |          |          | WD        |
| DRB1*04:95                       | P                                        | WD                                  | WD    |     | WD  |      |      |     |     |     | DRB1*04:95                      |          |          |           |

Supplementary Table 3d. Comparison of HLA-DRB1 P group two-field assignments among CIWD catalogs <sup>a</sup>

|                                  |                                          | 3.0.0 CIWD                          |       |     |     |      |      |     |     |     | 2.0.0 CWD                       |          | EFI CWD  | China CWD |
|----------------------------------|------------------------------------------|-------------------------------------|-------|-----|-----|------|------|-----|-----|-----|---------------------------------|----------|----------|-----------|
|                                  |                                          | Category by Population <sup>b</sup> |       |     |     |      |      |     |     |     |                                 |          |          |           |
| HLA-DRB1 IPD-<br>HLA/IMGT 3.31.0 | Nomenclature<br>Designation <sup>a</sup> | Highest<br>Frequency                | Total | AFA | API | EURO | MENA | HIS | NAM | UNK | HLA-DRB1 IPD-<br>IMGT/HLA 3.9.0 | Category | Category | Category  |
| DRB1*04:96                       | P                                        | WD                                  | WD    |     |     | WD   | WD   |     |     |     | DRB1*04:96                      |          | WD       |           |
| DRB1*04:101                      | P                                        | WD                                  | WD    |     |     |      |      |     |     |     | DRB1*04:101                     |          |          |           |
| DRB1*04:105                      | P                                        | I                                   | WD    |     | I   | WD   |      |     |     |     | DRB1*04:105                     |          | WD       |           |
| DRB1*04:127                      | P                                        | WD                                  | WD    |     |     |      |      |     |     | WD  | DRB1*04:127                     |          |          |           |
| DRB1*07:01                       | P                                        | C                                   | C     | C   | C   | C    | C    | C   | C   | C   | DRB1*07:01                      | C        | C        | C         |
| DRB1*07:03                       | P                                        | C                                   | I     |     | C   | WD   | WD   |     |     | I   | DRB1*07:03                      | WD       |          |           |
| DRB1*07:05                       | P                                        | I                                   | I     |     |     | I    |      | WD  |     | I   | DRB1*07:05                      | WD       |          |           |
| DRB1*07:07                       | P                                        | I                                   | I     |     |     | I    |      |     |     | WD  | DRB1*07:07                      | WD       |          |           |
| DRB1*07:10N                      | N                                        | WD                                  | WD    |     |     | WD   |      |     |     |     | DRB1*07:10N                     |          |          |           |
| DRB1*07:11                       | P                                        | I                                   | WD    |     |     | WD   |      | I   |     | WD  | DRB1*07:11                      | WD       |          | WD        |
| DRB1*07:13                       | P                                        | I                                   | WD    |     | I   |      |      |     |     |     | DRB1*07:13                      | WD       |          | WD        |
| DRB1*07:15                       | P                                        | WD                                  | WD    |     |     |      |      | WD  |     |     | DRB1*07:15                      |          |          |           |
| DRB1*07:16                       | P                                        | I                                   | WD    |     |     | WD   |      | I   |     |     | DRB1*07:16                      |          |          |           |
| DRB1*07:23                       | P                                        | WD                                  | WD    |     |     | WD   |      |     |     |     | DRB1*07:23                      |          |          |           |
| DRB1*07:26N                      | N                                        | WD                                  | WD    |     |     | WD   |      |     |     |     | DRB1*07:26N                     |          |          |           |
| DRB1*07:29                       | P                                        | WD                                  | WD    |     |     | WD   |      |     |     |     | DRB1*07:29                      |          |          |           |
| DRB1*07:30                       | P                                        | WD                                  | WD    |     |     | WD   |      |     |     |     | DRB1*07:30                      |          |          |           |
| DRB1*07:32                       | P                                        | WD                                  | WD    |     |     | WD   |      |     |     |     | DRB1*07:32                      |          |          |           |
| DRB1*07:39                       | P                                        | WD                                  | WD    |     |     | WD   |      |     |     |     | DRB1*07:39                      |          |          |           |
| DRB1*07:61                       | P                                        | WD                                  | WD    |     |     |      | WD   |     |     | WD  | DRB1*07:61                      |          |          |           |
| DRB1*08:01                       | P                                        | C                                   | C     | C   | C   | C    | C    | C   | C   | C   | DRB1*08:01                      | C        | C        | WD        |
| DRB1*08:02                       | P                                        | C                                   | C     | C   | C   | C    | C    | C   | C   | C   | DRB1*08:02                      | C        | C        | C         |
| DRB1*08:03                       | P                                        | C                                   | C     | C   | C   | C    | C    | C   | C   | C   | DRB1*08:03                      | C        | C        | C         |
| DRB1*08:04                       | P                                        | C                                   | C     | C   | C   | C    | C    | C   | C   | C   | DRB1*08:04                      | C        | C        | WD        |
| DRB1*08:05                       | P                                        | I                                   | WD    |     |     | WD   |      |     |     | I   | DRB1*08:05                      | WD       | WD       |           |
| DRB1*08:06                       | P                                        | C                                   | C     | C   | I   | C    | C    | C   | C   | C   | DRB1*08:06                      | C        | C        |           |
| DRB1*08:07                       | P                                        | C                                   | C     | WD  |     | I    |      | C   | C   | C   | DRB1*08:07                      | C        | WD       |           |
| DRB1*08:08                       | P                                        | C                                   | WD    | C   |     |      | WD   |     |     | I   | DRB1*08:08                      | WD       |          |           |

Supplementary Table 3d. Comparison of HLA-DRB1 P group two-field assignments among CIWD catalogs <sup>a</sup>

|                                  |                                          | 3.0.0 CIWD                          |       |     |     |      |      |     |     |     | 2.0.0 CWD                       |          | EFI CWD  | China CWD |
|----------------------------------|------------------------------------------|-------------------------------------|-------|-----|-----|------|------|-----|-----|-----|---------------------------------|----------|----------|-----------|
|                                  |                                          | Category by Population <sup>b</sup> |       |     |     |      |      |     |     |     |                                 |          |          |           |
| HLA-DRB1 IPD-<br>HLA/IMGT 3.31.0 | Nomenclature<br>Designation <sup>a</sup> | Highest<br>Frequency                | Total | AFA | API | EURO | MENA | HIS | NAM | UNK | HLA-DRB1 IPD-<br>IMGT/HLA 3.9.0 | Category | Category | Category  |
| DRB1*08:09                       | P                                        | C                                   | I     |     | C   | WD   |      | WD  |     | I   | DRB1*08:09                      | WD       | WD       | C         |
| DRB1*08:10                       | P                                        | C                                   | I     | WD  | I   | I    | C    | C   | C   | C   | DRB1*08:10                      | C        | C        |           |
| DRB1*08:11                       | P                                        | C                                   | I     | C   |     | I    |      | C   | C   | C   | DRB1*08:11                      | C        | WD       |           |
| DRB1*08:12                       | P                                        | I                                   | WD    |     | I   |      |      |     |     |     | DRB1*08:12                      | WD       |          | WD        |
| DRB1*08:13                       | P                                        | I                                   | WD    |     |     | WD   |      | I   |     | I   | DRB1*08:13                      | WD       |          |           |
| DRB1*08:14                       | P                                        | I                                   | WD    |     | I   |      |      |     |     |     | DRB1*08:14                      | WD       |          | WD        |
| DRB1*08:16                       | P                                        | WD                                  | WD    |     |     | WD   |      |     |     |     | DRB1*08:16                      |          |          |           |
| DRB1*08:17                       | P                                        | I                                   | I     |     |     | I    |      |     |     | WD  | DRB1*08:17                      | WD       | WD       |           |
| DRB1*08:18                       | P                                        | I                                   | I     |     | I   | WD   |      | I   |     | I   | DRB1*08:18                      | WD       | WD       | WD        |
| DRB1*08:19                       | P                                        | I                                   | WD    |     | I   |      |      |     |     |     | DRB1*08:19                      | WD       |          | WD        |
| DRB1*08:20                       | P                                        | WD                                  | WD    | WD  |     |      |      |     |     |     | DRB1*08:20                      | WD       |          |           |
| DRB1*08:22                       | P                                        | WD                                  | WD    |     |     |      |      |     |     |     | DRB1*08:22                      |          |          |           |
| DRB1*08:26                       | P                                        | WD                                  | WD    |     |     | WD   |      |     |     |     | DRB1*08:26                      | WD       | WD       |           |
| DRB1*08:28                       | P                                        | WD                                  | WD    |     |     | WD   |      |     |     |     | DRB1*08:28                      | WD       |          |           |
| DRB1*08:30                       | P                                        | o                                   | o     |     |     |      |      |     |     |     | DRB1*08:30                      |          |          | WD        |
| DRB1*08:32                       | P                                        | o                                   | o     |     |     |      |      |     |     |     | DRB1*08:32                      |          |          | WD        |
| DRB1*08:34                       | P                                        | WD                                  | WD    |     |     | WD   |      |     |     |     | DRB1*08:34                      |          |          |           |
| DRB1*08:35                       | P                                        | o                                   | o     |     |     |      |      |     |     |     | DRB1*08:35                      |          |          | WD        |
| DRB1*08:36                       | P                                        | o                                   | o     |     |     |      |      |     |     |     | DRB1*08:36                      |          |          | WD        |
| DRB1*08:40                       | P                                        | o                                   | o     |     |     |      |      |     |     |     | DRB1*08:40                      |          | WD       |           |
| DRB1*08:41                       | P                                        | o                                   | o     |     |     |      |      |     |     |     | DRB1*08:41                      |          |          | WD        |
| DRB1*08:44                       | P                                        | WD                                  | WD    |     |     | WD   |      |     |     |     | DRB1*08:44                      |          | WD       |           |
| DRB1*08:82                       | P                                        | I                                   | WD    |     |     | WD   |      | I   |     | I   | DRB1*08:82                      |          |          |           |
| DRB1*09:01                       | P                                        | C                                   | C     | C   | C   | C    | C    | C   | C   | C   | DRB1*09:01                      | C        | C        | C         |
| DRB1*09:02                       | P                                        | WD                                  | WD    |     |     |      |      |     |     |     | DRB1*09:02                      |          |          |           |
| DRB1*09:04                       | P                                        | I                                   | WD    |     | I   |      |      |     |     |     | DRB1*09:04                      | WD       |          | WD        |
| DRB1*09:06                       | P                                        | I                                   | WD    |     |     | WD   |      | I   |     | WD  | DRB1*09:06                      | WD       |          | WD        |
| DRB1*09:07                       | P                                        | o                                   | o     |     |     |      |      |     |     |     | DRB1*09:07                      |          |          | WD        |

Supplementary Table 3d. Comparison of HLA-DRB1 P group two-field assignments among CIWD catalogs <sup>a</sup>

|                                  |                                          | 3.0.0 CIWD                          |       |     |     |      |      |     |     |     | 2.0.0 CWD                       |          | EFI CWD  | China CWD |
|----------------------------------|------------------------------------------|-------------------------------------|-------|-----|-----|------|------|-----|-----|-----|---------------------------------|----------|----------|-----------|
|                                  |                                          | Category by Population <sup>b</sup> |       |     |     |      |      |     |     |     |                                 |          |          |           |
| HLA-DRB1 IPD-<br>HLA/IMGT 3.31.0 | Nomenclature<br>Designation <sup>a</sup> | Highest<br>Frequency                | Total | AFA | API | EURO | MENA | HIS | NAM | UNK | HLA-DRB1 IPD-<br>IMGT/HLA 3.9.0 | Category | Category | Category  |
| DRB1*09:10                       | P                                        | o                                   | o     |     |     |      |      |     |     |     | DRB1*09:10                      |          |          | WD        |
| DRB1*09:20                       | P                                        | WD                                  | WD    |     |     | WD   |      |     |     |     | DRB1*09:20                      |          |          |           |
| DRB1*09:27                       | P                                        | WD                                  | WD    |     | WD  |      |      |     |     |     | DRB1*09:27                      |          |          |           |
| DRB1*10:01                       | P                                        | C                                   | C     | C   | C   | C    | C    | C   | C   | C   | DRB1*10:01                      | C        | C        | C         |
| DRB1*10:02                       | P                                        | I                                   | WD    |     | I   | WD   |      |     |     |     | DRB1*10:02                      |          | WD       |           |
| DRB1*10:06                       | P                                        | WD                                  | WD    |     | WD  |      |      |     |     |     | DRB1*10:06                      |          |          |           |
| DRB1*11:01                       | P                                        | C                                   | C     | C   | C   | C    | C    | C   | C   | C   | DRB1*11:01                      | C        | C        | C         |
| DRB1*11:02                       | P                                        | C                                   | C     | C   | C   | C    | C    | C   | C   | C   | DRB1*11:02                      | C        | C        | WD        |
| DRB1*11:03                       | P                                        | C                                   | C     | C   | C   | C    | C    | C   | C   | C   | DRB1*11:03                      | C        | C        | WD        |
| DRB1*11:04                       | P                                        | C                                   | C     | C   | C   | C    | C    | C   | C   | C   | DRB1*11:04                      | C        | C        | C         |
| DRB1*11:05                       | P                                        | I                                   | WD    |     | I   |      |      |     |     | I   | DRB1*11:05                      | WD       |          |           |
| DRB1*11:06                       | P                                        | C                                   | C     | WD  | C   | I    | C    | I   | C   | C   | DRB1*11:06                      | C        | WD       | C         |
| DRB1*11:07                       | P                                        | I                                   | WD    | WD  |     | WD   |      | I   |     | WD  | DRB1*11:07                      | WD       |          |           |
| DRB1*11:08                       | P                                        | C                                   | I     | WD  | C   | I    | WD   |     | WD  | I   | DRB1*11:08                      | WD       |          | WD        |
| DRB1*11:09                       | P                                        | I                                   | I     |     |     | I    | WD   |     |     | I   | DRB1*11:09                      | C        |          |           |
| DRB1*11:10                       | P                                        | C                                   | I     | C   |     | WD   |      | I   |     | I   | DRB1*11:10                      | C        |          |           |
| DRB1*11:11                       | P                                        | C                                   | C     | WD  | C   | I    | WD   | I   |     | C   | DRB1*11:11                      | C        | WD       | WD        |
| DRB1*11:12                       | P                                        | C                                   | C     | WD  | I   | C    | C    | I   |     | I   | DRB1*11:12                      | C        |          | WD        |
| DRB1*11:13                       | P                                        | I                                   | I     | WD  |     | I    | WD   | I   |     | I   | DRB1*11:13                      | WD       |          |           |
| DRB1*11:14                       | P                                        | C                                   | I     | C   | WD  | I    |      | I   | WD  | I   | DRB1*11:14                      | WD       | WD       |           |
| DRB1*11:15                       | P                                        | C                                   | C     | WD  | WD  | C    | C    | C   | C   | C   | DRB1*11:15                      | C        | WD       | WD        |
| DRB1*11:16                       | P                                        | WD                                  | WD    |     |     | WD   | WD   |     |     |     | DRB1*11:16                      | WD       | WD       |           |
| DRB1*11:17                       | P                                        | C                                   | I     | C   |     | WD   |      | I   | C   | I   | DRB1*11:17                      | C        |          |           |
| DRB1*11:18                       | P                                        | I                                   | I     |     | I   | WD   |      | WD  |     | I   | DRB1*11:18                      | WD       |          |           |
| DRB1*11:19                       | P                                        | I                                   | I     |     | WD  | I    |      | I   |     | I   | DRB1*11:19                      | C        |          | WD        |
| DRB1*11:20                       | P                                        | WD                                  | WD    |     |     | WD   |      |     |     |     | DRB1*11:20                      | WD       |          | WD        |
| DRB1*11:21                       | P                                        | WD                                  | WD    |     |     | WD   |      |     |     |     | DRB1*11:21                      |          |          |           |
| DRB1*11:23                       | P                                        | I                                   | WD    |     |     | WD   |      |     |     | I   | DRB1*11:23                      |          |          | WD        |

Supplementary Table 3d. Comparison of HLA-DRB1 P group two-field assignments among CIWD catalogs <sup>a</sup>

|                                  |                                          | 3.0.0 CIWD                          |       |     |     |      |      |     |     |     | 2.0.0 CWD                       |          | EFI CWD  | China CWD |
|----------------------------------|------------------------------------------|-------------------------------------|-------|-----|-----|------|------|-----|-----|-----|---------------------------------|----------|----------|-----------|
|                                  |                                          | Category by Population <sup>b</sup> |       |     |     |      |      |     |     |     |                                 |          |          |           |
| HLA-DRB1 IPD-<br>HLA/IMGT 3.31.0 | Nomenclature<br>Designation <sup>a</sup> | Highest<br>Frequency                | Total | AFA | API | EURO | MENA | HIS | NAM | UNK | HLA-DRB1 IPD-<br>IMGT/HLA 3.9.0 | Category | Category | Category  |
| DRB1*11:24                       | P                                        | I                                   | I     | WD  |     | I    | WD   | WD  |     | I   | DRB1*11:24                      | WD       |          |           |
| DRB1*11:25                       | P                                        | WD                                  | WD    |     |     | WD   |      |     |     |     | DRB1*11:25                      | WD       |          |           |
| DRB1*11:26                       | P                                        | WD                                  | WD    |     |     | WD   |      |     |     | WD  | DRB1*11:26                      |          |          |           |
| DRB1*11:27                       | P                                        | I                                   | I     |     | WD  | I    |      | I   |     | WD  | DRB1*11:27                      |          |          | WD        |
| DRB1*11:28                       | P                                        | I                                   | I     | WD  | I   | I    | WD   | I   |     | I   | DRB1*11:28                      | WD       |          | WD        |
| DRB1*11:29                       | P                                        | I                                   | I     | WD  | I   | I    | WD   |     |     | I   | DRB1*11:29                      | WD       | WD       | WD        |
| DRB1*11:32                       | P                                        | WD                                  | WD    |     |     | WD   |      |     |     | WD  | DRB1*11:32                      | WD       |          |           |
| DRB1*11:33                       | P                                        | WD                                  | WD    |     |     | WD   |      |     |     |     | DRB1*11:33                      |          |          |           |
| DRB1*11:34                       | P                                        | I                                   | I     |     |     | I    |      |     |     | WD  | DRB1*11:34                      | WD       |          |           |
| DRB1*11:35                       | P                                        | WD                                  | WD    |     |     | WD   | WD   |     |     |     | DRB1*11:35                      |          |          |           |
| DRB1*11:36                       | P                                        | I                                   | I     |     | WD  | I    | WD   |     |     | I   | DRB1*11:36                      | WD       |          |           |
| DRB1*11:37                       | P                                        | WD                                  | WD    |     | WD  | WD   |      |     |     |     | DRB1*11:37                      | WD       |          | WD        |
| DRB1*11:39                       | P                                        | I                                   | I     |     |     | I    |      |     |     | I   | DRB1*11:39                      | WD       |          | WD        |
| DRB1*11:41                       | P                                        | WD                                  | WD    |     |     | WD   |      |     |     |     | DRB1*11:41                      |          |          |           |
| DRB1*11:42                       | P                                        | I                                   | WD    |     |     | WD   | WD   | I   |     | I   | DRB1*11:42                      | WD       | WD       |           |
| DRB1*11:43                       | P                                        | I                                   | I     |     |     | I    |      | I   |     | I   | DRB1*11:43                      | WD       |          |           |
| DRB1*11:44                       | P                                        | WD                                  | WD    |     |     | WD   |      |     |     |     | DRB1*11:44                      |          |          |           |
| DRB1*11:45                       | P                                        | WD                                  | WD    |     |     |      |      | WD  |     |     | DRB1*11:45                      | WD       |          |           |
| DRB1*11:47                       | P                                        | C                                   | WD    |     |     |      |      | I   | C   | WD  | DRB1*11:47                      | WD       |          |           |
| DRB1*11:48                       | P                                        | WD                                  | WD    | WD  |     |      |      |     |     |     | DRB1*11:48                      |          |          |           |
| DRB1*11:49                       | P                                        | WD                                  | WD    |     |     | WD   |      |     |     |     | DRB1*11:49                      |          |          |           |
| DRB1*11:51                       | P                                        | WD                                  | WD    |     |     |      |      |     |     |     | DRB1*11:51                      |          |          |           |
| DRB1*11:54                       | P                                        | o                                   | o     |     |     |      |      |     |     |     | DRB1*11:54                      |          |          | WD        |
| DRB1*11:56                       | P                                        | WD                                  | WD    |     |     | WD   |      |     |     |     | DRB1*11:56                      | WD       |          |           |
| DRB1*11:57                       | P                                        | o                                   | o     |     |     |      |      |     |     |     | DRB1*11:57                      |          |          | WD        |
| DRB1*11:58                       | P                                        | WD                                  | WD    |     |     | WD   |      |     |     |     | DRB1*11:58                      |          |          |           |
| DRB1*11:60                       | P                                        | WD                                  | WD    |     |     |      |      |     |     |     | DRB1*11:60                      |          |          |           |
| DRB1*11:61                       | P                                        | WD                                  | WD    |     |     | WD   |      |     |     |     | DRB1*11:61                      |          |          |           |

Supplementary Table 3d. Comparison of HLA-DRB1 P group two-field assignments among CIWD catalogs <sup>a</sup>

|                                  |                                          | 3.0.0 CIWD                          |       |     |     |      |      |     |     |     | 2.0.0 CWD                       |          | EFI CWD  | China CWD |
|----------------------------------|------------------------------------------|-------------------------------------|-------|-----|-----|------|------|-----|-----|-----|---------------------------------|----------|----------|-----------|
|                                  |                                          | Category by Population <sup>b</sup> |       |     |     |      |      |     |     |     |                                 |          |          |           |
| HLA-DRB1 IPD-<br>HLA/IMGT 3.31.0 | Nomenclature<br>Designation <sup>a</sup> | Highest<br>Frequency                | Total | AFA | API | EURO | MENA | HIS | NAM | UNK | HLA-DRB1 IPD-<br>IMGT/HLA 3.9.0 | Category | Category | Category  |
| DRB1*11:62                       | P                                        | WD                                  | WD    |     | WD  |      |      |     |     |     | DRB1*11:62                      |          |          |           |
| DRB1*11:65                       | P                                        | WD                                  | WD    | WD  |     |      |      |     |     |     | DRB1*11:65                      |          |          |           |
| DRB1*11:66                       | P                                        | C                                   | I     |     | C   |      |      |     |     |     | DRB1*11:66                      | WD       |          |           |
| DRB1*11:69                       | P                                        | WD                                  | WD    |     |     | WD   |      |     |     |     | DRB1*11:69                      | WD       |          |           |
| DRB1*11:75                       | P                                        | o                                   | o     |     |     |      |      |     |     |     | DRB1*11:75                      |          |          | WD        |
| DRB1*11:76                       | P                                        | WD                                  | WD    |     |     | WD   |      |     |     |     | DRB1*11:76                      |          |          |           |
| DRB1*11:78                       | P                                        | WD                                  | WD    |     |     | WD   |      |     |     |     | DRB1*11:78                      |          |          |           |
| DRB1*11:81                       | P                                        | WD                                  | WD    |     |     |      | WD   |     |     |     | DRB1*11:81                      |          |          |           |
| DRB1*11:84                       | P                                        | I                                   | WD    |     |     | WD   |      | I   |     |     | DRB1*11:84                      |          |          |           |
| DRB1*11:88                       | P                                        | WD                                  | WD    |     |     | WD   |      |     |     |     | DRB1*11:88                      |          |          |           |
| DRB1*11:93                       | P                                        | WD                                  | WD    |     |     |      |      |     |     |     | DRB1*11:93                      |          |          |           |
| DRB1*11:94                       | P                                        | WD                                  | WD    |     |     | WD   |      |     |     |     | DRB1*11:94                      |          |          |           |
| DRB1*11:96                       | P                                        | WD                                  | WD    |     |     |      |      |     |     |     | DRB1*11:96                      |          |          |           |
| DRB1*11:99                       | P                                        | WD                                  | WD    |     |     | WD   |      |     |     |     | DRB1*11:99                      |          |          |           |
| DRB1*11:101                      | P                                        | WD                                  | WD    |     | WD  |      |      |     |     |     | DRB1*11:101                     |          |          | WD        |
| DRB1*11:103                      | P                                        | WD                                  | WD    |     |     | WD   |      |     |     |     | DRB1*11:103                     |          |          |           |
| DRB1*11:104                      | P                                        | WD                                  | WD    |     |     | WD   |      |     |     |     | DRB1*11:104                     |          |          |           |
| DRB1*11:106                      | P                                        | o                                   | o     |     |     |      |      |     |     |     | DRB1*11:106                     |          |          | WD        |
| DRB1*11:111                      | P                                        | o                                   | o     |     |     |      |      |     |     |     | DRB1*11:111                     |          |          | WD        |
| DRB1*11:113                      | P                                        | WD                                  | WD    |     |     | WD   |      |     |     | WD  | DRB1*11:113                     |          |          |           |
| DRB1*11:125                      | P                                        | WD                                  | WD    |     |     | WD   |      |     |     |     | DRB1*11:125                     |          |          |           |
| DRB1*11:128                      | P                                        | WD                                  | WD    |     |     | WD   |      |     |     |     | DRB1*11:128                     |          |          |           |
| DRB1*11:137                      | P                                        | WD                                  | WD    |     |     | WD   |      |     |     |     | DRB1*11:137                     |          |          |           |
| DRB1*11:145                      | P                                        | WD                                  | WD    |     |     |      | WD   |     |     |     | DRB1*11:145                     |          |          |           |
| DRB1*11:179                      | P                                        | WD                                  | WD    |     |     |      | WD   |     |     |     | DRB1*11:179                     |          |          |           |
| DRB1*12:01                       | P                                        | C                                   | C     | C   | C   | C    | C    | C   | C   | C   | DRB1*12:01                      | C        | C        | C         |
| DRB1*12:02                       | P                                        | C                                   | C     | C   | C   | C    | C    | C   | C   | C   | DRB1*12:02                      | C        | C        | C         |
| DRB1*12:03                       | P                                        | I                                   | I     |     |     | I    |      |     |     | I   | DRB1*12:03                      |          |          |           |

Supplementary Table 3d. Comparison of HLA-DRB1 P group two-field assignments among CIWD catalogs <sup>a</sup>

| HLA-DRB1 IPD-<br>HLA/IMGT 3.31.0 | Nomenclature<br>Designation <sup>a</sup> | 3.0.0 CIWD           |       |     |     |      |      |     |     |     | 2.0.0 CWD                       |          | EFI CWD  | China CWD |
|----------------------------------|------------------------------------------|----------------------|-------|-----|-----|------|------|-----|-----|-----|---------------------------------|----------|----------|-----------|
|                                  |                                          | Highest<br>Frequency | Total | AFA | API | EURO | MENA | HIS | NAM | UNK | HLA-DRB1 IPD-<br>IMGT/HLA 3.9.0 | Category | Category | Category  |
|                                  |                                          |                      |       |     |     |      |      |     |     |     |                                 |          |          |           |
| DRB1*12:04                       | P                                        | WD                   | WD    | WD  |     |      |      |     |     | WD  | DRB1*12:04                      | WD       |          |           |
| DRB1*12:05                       | P                                        | WD                   | WD    |     | WD  | WD   |      |     |     |     | DRB1*12:05                      | WD       |          | WD        |
| DRB1*12:08                       | P                                        | WD                   | WD    |     | WD  |      |      |     |     |     | DRB1*12:08                      |          |          | WD        |
| DRB1*12:11                       | P                                        | WD                   | WD    |     |     | WD   |      |     |     |     | DRB1*12:11                      |          |          |           |
| DRB1*12:14                       | P                                        | o                    | o     |     |     |      |      |     |     |     | DRB1*12:14                      |          |          | WD        |
| DRB1*12:16                       | P                                        | o                    | o     |     |     |      |      |     |     |     | DRB1*12:16                      |          |          | WD        |
| DRB1*12:18                       | P                                        | o                    | o     |     |     |      |      |     |     |     | DRB1*12:18                      |          |          | WD        |
| DRB1*12:19                       | P                                        | o                    | o     |     |     |      |      |     |     |     | DRB1*12:19                      |          |          | WD        |
| DRB1*12:20                       | P                                        | WD                   | WD    |     | WD  |      |      |     |     |     | DRB1*12:20                      |          |          | WD        |
| DRB1*12:24N                      | N                                        | WD                   | WD    |     |     | WD   |      |     |     | WD  | DRB1*12:24N                     |          |          |           |
| DRB1*12:25                       | P                                        | WD                   | WD    | WD  |     |      |      |     |     | WD  | DRB1*12:25                      |          |          |           |
| DRB1*12:27                       | P                                        | o                    | o     |     |     |      |      |     |     |     | DRB1*12:27                      |          |          | WD        |
| DRB1*12:28                       | P                                        | o                    | o     |     |     |      |      |     |     |     | DRB1*12:28                      |          |          | WD        |
| DRB1*12:48                       | P                                        | WD                   | WD    |     |     | WD   |      |     |     |     | DRB1*12:48                      |          |          |           |
| DRB1*13:01                       | P                                        | C                    | C     | C   | C   | C    | C    | C   | C   | C   | DRB1*13:01                      | C        | C        | C         |
| DRB1*13:02                       | P                                        | C                    | C     | C   | C   | C    | C    | C   | C   | C   | DRB1*13:02                      | C        | C        | C         |
| DRB1*13:03                       | P                                        | C                    | C     | C   | C   | C    | C    | C   | C   | C   | DRB1*13:03                      | C        | C        | WD        |
| DRB1*13:04                       | P                                        | C                    | C     | C   | I   | I    | WD   | C   | C   | C   | DRB1*13:04                      | C        | C        |           |
| DRB1*13:05                       | P                                        | C                    | C     | C   | C   | C    | C    | C   | C   | C   | DRB1*13:05                      | C        | C        | WD        |
| DRB1*13:06                       | P                                        | I                    | I     |     |     | I    |      | WD  |     | I   | DRB1*13:06                      | WD       | WD       |           |
| DRB1*13:07                       | P                                        | I                    | WD    |     | I   | WD   | WD   |     |     | WD  | DRB1*13:07                      | C        | WD       | WD        |
| DRB1*13:08                       | P                                        | I                    | WD    |     | I   | WD   |      |     |     |     | DRB1*13:08                      | WD       | WD       | WD        |
| DRB1*13:09                       | P                                        | I                    | WD    |     |     | WD   |      | I   |     |     | DRB1*13:09                      | WD       |          |           |
| DRB1*13:10                       | P                                        | I                    | I     | WD  |     | I    | WD   | I   |     | I   | DRB1*13:10                      | C        | WD       |           |
| DRB1*13:11                       | P                                        | I                    | I     |     | I   | I    | WD   | I   |     | I   | DRB1*13:11                      | WD       | WD       |           |
| DRB1*13:12                       | P                                        | C                    | C     | WD  | C   | WD   |      | I   |     | C   | DRB1*13:12                      | C        | WD       | C         |
| DRB1*13:13                       | P                                        | WD                   | WD    |     | WD  |      |      |     |     |     | DRB1*13:13                      | WD       |          | WD        |
| DRB1*13:14                       | P                                        | I                    | I     | WD  | I   | I    | WD   | I   |     | I   | DRB1*13:14                      | C        | WD       | WD        |

Supplementary Table 3d. Comparison of HLA-DRB1 P group two-field assignments among CIWD catalogs <sup>a</sup>

|                                  |                                          | 3.0.0 CIWD                          |       |     |     |      |      |     |     |     | 2.0.0 CWD                       |          | EFI CWD  | China CWD |
|----------------------------------|------------------------------------------|-------------------------------------|-------|-----|-----|------|------|-----|-----|-----|---------------------------------|----------|----------|-----------|
|                                  |                                          | Category by Population <sup>b</sup> |       |     |     |      |      |     |     |     |                                 |          |          |           |
| HLA-DRB1 IPD-<br>HLA/IMGT 3.31.0 | Nomenclature<br>Designation <sup>a</sup> | Highest<br>Frequency                | Total | AFA | API | EURO | MENA | HIS | NAM | UNK | HLA-DRB1 IPD-<br>IMGT/HLA 3.9.0 | Category | Category | Category  |
| DRB1*13:15                       | P                                        | C                                   | I     |     |     | C    | WD   | WD  |     | I   | DRB1*13:15                      | WD       | C        |           |
| DRB1*13:16                       | P                                        | C                                   | I     | C   |     | WD   | WD   | I   | WD  | I   | DRB1*13:16                      | WD       | WD       |           |
| DRB1*13:17                       | P                                        | WD                                  | WD    |     |     | WD   |      |     |     |     | DRB1*13:17                      | WD       | WD       |           |
| DRB1*13:18                       | P                                        | I                                   | I     |     |     | I    | WD   |     |     | I   | DRB1*13:18                      | WD       | WD       |           |
| DRB1*13:19                       | P                                        | I                                   | I     |     | I   | I    | WD   |     |     | WD  | DRB1*13:19                      | WD       | WD       | WD        |
| DRB1*13:20                       | P                                        | WD                                  | WD    | WD  |     | WD   |      |     |     | WD  | DRB1*13:20                      | C        | WD       |           |
| DRB1*13:21                       | P                                        | I                                   | I     |     |     | I    | WD   | WD  |     | I   | DRB1*13:21                      |          | WD       |           |
| DRB1*13:22                       | P                                        | I                                   | I     |     |     | I    |      |     |     | WD  | DRB1*13:22                      | WD       | WD       |           |
| DRB1*13:23                       | P                                        | WD                                  | WD    |     |     |      |      |     |     |     | DRB1*13:23                      |          | WD       |           |
| DRB1*13:24                       | P                                        | WD                                  | WD    |     |     | WD   |      |     |     | WD  | DRB1*13:24                      |          | WD       |           |
| DRB1*13:25                       | P                                        | WD                                  | WD    |     |     |      |      |     |     |     | DRB1*13:25                      | WD       |          |           |
| DRB1*13:26                       | P                                        | WD                                  | WD    |     |     | WD   |      |     |     |     | DRB1*13:26                      | WD       | WD       |           |
| DRB1*13:27                       | P                                        | WD                                  | WD    | WD  |     | WD   |      |     |     |     | DRB1*13:27                      | WD       | WD       |           |
| DRB1*13:28                       | P                                        | WD                                  | WD    |     |     | WD   |      |     |     |     | DRB1*13:28                      |          | WD       |           |
| DRB1*13:29                       | P                                        | WD                                  | WD    |     |     | WD   |      |     |     | WD  | DRB1*13:29                      | WD       | WD       |           |
| DRB1*13:31                       | P                                        | C                                   | I     | C   |     | WD   |      | I   | WD  | I   | DRB1*13:31                      | WD       |          |           |
| DRB1*13:32                       | P                                        | WD                                  | WD    |     |     |      |      |     |     |     | DRB1*13:32                      |          | WD       |           |
| DRB1*13:33                       | P                                        | WD                                  | WD    |     |     | WD   |      |     |     |     | DRB1*13:33                      |          |          |           |
| DRB1*13:34                       | P                                        | WD                                  | WD    |     |     |      |      |     |     |     | DRB1*13:34                      |          |          |           |
| DRB1*13:36                       | P                                        | WD                                  | WD    |     |     | WD   |      |     |     | WD  | DRB1*13:36                      | WD       |          |           |
| DRB1*13:37                       | P                                        | WD                                  | WD    | WD  |     |      |      |     |     |     | DRB1*13:37                      | WD       |          |           |
| DRB1*13:38                       | P                                        | I                                   | WD    | WD  |     | I    |      |     |     |     | DRB1*13:38                      | WD       |          |           |
| DRB1*13:39                       | P                                        | WD                                  | WD    |     | WD  | WD   |      |     |     |     | DRB1*13:39                      | WD       |          |           |
| DRB1*13:40                       | P                                        | I                                   | WD    |     |     | WD   |      | I   | WD  | WD  | DRB1*13:40                      | WD       |          |           |
| DRB1*13:41                       | P                                        | WD                                  | WD    |     |     |      |      |     |     |     | DRB1*13:41                      | WD       |          |           |
| DRB1*13:42                       | P                                        | I                                   | WD    |     | WD  | WD   |      | I   |     |     | DRB1*13:42                      | WD       |          |           |
| DRB1*13:48                       | P                                        | WD                                  | WD    |     |     | WD   |      |     |     |     | DRB1*13:48                      |          |          |           |
| DRB1*13:49                       | P                                        | C                                   | I     |     | C   | WD   |      |     |     |     | DRB1*13:49                      | WD       |          |           |



Supplementary Table 3d. Comparison of HLA-DRB1 P group two-field assignments among CIWD catalogs <sup>a</sup>

|                                  |                                          | 3.0.0 CIWD                          |       |     |     |      |      |     |     |     | 2.0.0 CWD                       |          | EFI CWD  | China CWD |
|----------------------------------|------------------------------------------|-------------------------------------|-------|-----|-----|------|------|-----|-----|-----|---------------------------------|----------|----------|-----------|
|                                  |                                          | Category by Population <sup>b</sup> |       |     |     |      |      |     |     |     |                                 |          |          |           |
| HLA-DRB1 IPD-<br>HLA/IMGT 3.31.0 | Nomenclature<br>Designation <sup>a</sup> | Highest<br>Frequency                | Total | AFA | API | EURO | MENA | HIS | NAM | UNK | HLA-DRB1 IPD-<br>IMGT/HLA 3.9.0 | Category | Category | Category  |
| DRB1*13:50                       | P                                        | WD                                  | WD    |     | WD  | WD   |      |     |     | WD  | DRB1*13:50                      |          |          | WD        |
| DRB1*13:52                       | P                                        | WD                                  | WD    |     |     | WD   |      |     |     |     | DRB1*13:52                      |          |          |           |
| DRB1*13:53                       | P                                        | WD                                  | WD    |     |     | WD   |      |     |     |     | DRB1*13:53                      |          |          |           |
| DRB1*13:54                       | P                                        | WD                                  | WD    |     |     | WD   | WD   |     |     |     | DRB1*13:54                      |          |          |           |
| DRB1*13:56                       | P                                        | I                                   | WD    |     |     | WD   |      | I   |     | WD  | DRB1*13:56                      | WD       |          |           |
| DRB1*13:59                       | P                                        | C                                   | WD    |     |     | WD   |      | C   | C   | I   | DRB1*13:59                      | WD       |          |           |
| DRB1*13:60                       | P                                        | o                                   | o     |     |     |      |      |     |     |     | DRB1*13:60                      | WD       |          |           |
| DRB1*13:61                       | P                                        | WD                                  | WD    |     | WD  | WD   |      |     |     |     | DRB1*13:61                      |          |          |           |
| DRB1*13:62                       | P                                        | WD                                  | WD    |     |     | WD   |      |     |     |     | DRB1*13:62                      |          | WD       |           |
| DRB1*13:63                       | P                                        | WD                                  | WD    |     |     | WD   |      |     |     |     | DRB1*13:63                      |          | WD       |           |
| DRB1*13:65                       | P                                        | WD                                  | WD    |     |     | WD   |      |     |     |     | DRB1*13:65                      |          |          |           |
| DRB1*13:66                       | P                                        | WD                                  | WD    |     |     |      |      |     |     |     | DRB1*13:66                      |          |          |           |
| DRB1*13:67                       | P                                        | WD                                  | WD    |     |     | WD   |      |     |     |     | DRB1*13:67                      |          |          |           |
| DRB1*13:69                       | P                                        | WD                                  | WD    | WD  |     |      |      |     |     |     | DRB1*13:69                      |          |          |           |
| DRB1*13:70                       | P                                        | WD                                  | WD    |     |     | WD   |      |     |     |     | DRB1*13:70                      |          |          |           |
| DRB1*13:75                       | P                                        | WD                                  | WD    |     |     |      |      |     |     |     | DRB1*13:75                      |          |          |           |
| DRB1*13:76                       | P                                        | o                                   | o     |     |     |      |      |     |     |     | DRB1*13:76                      | WD       |          |           |
| DRB1*13:77                       | P                                        | WD                                  | WD    |     |     |      |      |     |     |     | DRB1*13:77                      |          |          |           |
| DRB1*13:79                       | P                                        | WD                                  | WD    |     |     | WD   |      |     |     | WD  | DRB1*13:79                      |          |          |           |
| DRB1*13:80                       | P                                        | WD                                  | WD    |     |     | WD   |      |     |     |     | DRB1*13:80                      |          |          |           |
| DRB1*13:81                       | P                                        | WD                                  | WD    |     |     |      |      |     |     |     | DRB1*13:81                      | WD       |          |           |
| DRB1*13:82                       | P                                        | I                                   | WD    |     | I   |      |      |     |     |     | DRB1*13:82                      | WD       |          |           |
| DRB1*13:87                       | P                                        | WD                                  | WD    |     |     |      |      |     |     |     | DRB1*13:87                      |          |          |           |
| DRB1*13:88                       | P                                        | WD                                  | WD    |     |     | WD   |      |     |     |     | DRB1*13:88                      |          |          |           |
| DRB1*13:90                       | P                                        | WD                                  | WD    |     |     | WD   |      |     |     |     | DRB1*13:90                      |          |          |           |
| DRB1*13:91                       | P                                        | WD                                  | WD    |     |     | WD   |      |     |     |     | DRB1*13:91                      |          |          |           |
| DRB1*13:93                       | P                                        | I                                   | WD    |     |     | WD   |      |     |     | I   | DRB1*13:93                      |          |          |           |
| DRB1*13:95                       | P                                        | WD                                  | WD    |     |     | WD   |      |     |     |     | DRB1*13:95                      |          |          |           |

Supplementary Table 3d. Comparison of HLA-DRB1 P group two-field assignments among CIWD catalogs <sup>a</sup>

|                                  |                                          | 3.0.0 CIWD                          |       |     |     |      |      |     |     |     | 2.0.0 CWD                       |          | EFI CWD  | China CWD |
|----------------------------------|------------------------------------------|-------------------------------------|-------|-----|-----|------|------|-----|-----|-----|---------------------------------|----------|----------|-----------|
|                                  |                                          | Category by Population <sup>b</sup> |       |     |     |      |      |     |     |     |                                 |          |          |           |
| HLA-DRB1 IPD-<br>HLA/IMGT 3.31.0 | Nomenclature<br>Designation <sup>a</sup> | Highest<br>Frequency                | Total | AFA | API | EURO | MENA | HIS | NAM | UNK | HLA-DRB1 IPD-<br>IMGT/HLA 3.9.0 | Category | Category | Category  |
| DRB1*13:96                       | P                                        | WD                                  | WD    |     |     | WD   |      |     |     |     | DRB1*13:96                      |          |          |           |
| DRB1*13:97                       | P                                        | WD                                  | WD    |     |     |      |      |     |     |     | DRB1*13:97                      |          |          |           |
| DRB1*13:104                      | P                                        | WD                                  | WD    |     |     | WD   |      |     |     |     | DRB1*13:104                     |          |          |           |
| DRB1*13:106                      | P                                        | WD                                  | WD    |     |     | WD   |      |     |     |     | DRB1*13:106                     |          |          |           |
| DRB1*13:108                      | P                                        | WD                                  | WD    |     |     | WD   |      |     |     |     | DRB1*13:108                     |          |          |           |
| DRB1*13:111                      | P                                        | WD                                  | WD    |     |     | WD   |      |     |     |     | DRB1*13:111                     |          |          |           |
| DRB1*13:118                      | P                                        | o                                   | o     |     |     |      |      |     |     |     | DRB1*13:118                     |          |          | WD        |
| DRB1*13:124                      | P                                        | WD                                  | WD    |     |     | WD   |      |     |     |     | DRB1*13:124                     |          |          |           |
| DRB1*13:128                      | P                                        | I                                   | WD    |     |     | WD   |      | I   |     |     | DRB1*13:128                     |          |          |           |
| DRB1*13:150                      | P                                        | WD                                  | WD    |     |     | WD   |      |     |     |     | DRB1*13:150                     |          |          |           |
| DRB1*13:155                      | P                                        | WD                                  | WD    |     |     |      |      |     |     |     | DRB1*13:155                     |          |          |           |
| DRB1*13:158                      | P                                        | WD                                  | WD    |     |     | WD   |      |     |     |     | DRB1*13:158                     |          |          |           |
| DRB1*13:187                      | P                                        | WD                                  | WD    |     |     | WD   |      |     |     |     | DRB1*13:187                     |          |          |           |
| DRB1*14:01                       | P                                        | C                                   | C     | C   | C   | C    | C    | C   | C   | C   | DRB1*14:01                      | C        | C        | WD        |
| DRB1*14:02                       | P                                        | C                                   | C     | C   | C   | C    | C    | C   | C   | C   | DRB1*14:02                      | C        | C        | WD        |
| DRB1*14:03                       | P                                        | C                                   | C     |     | C   | I    | C    | WD  |     | C   | DRB1*14:03                      | C        | WD       | C         |
| DRB1*14:04                       | P                                        | C                                   | C     | C   | C   | C    | C    | C   | C   | C   | DRB1*14:04                      | C        | C        | C         |
| DRB1*14:05                       | P                                        | C                                   | C     | WD  | C   | I    | C    | I   |     | C   | DRB1*14:05                      | C        | WD       | C         |
| DRB1*14:06                       | P                                        | C                                   | C     | C   | C   | C    | C    | C   | C   | C   | DRB1*14:06                      | C        |          | WD        |
| DRB1*14:07                       | P                                        | C                                   | C     | WD  | C   | C    | C    | C   | C   | C   | DRB1*14:07                      | C        | WD       | C         |
| DRB1*14:08                       | P                                        | C                                   | I     |     | C   | WD   |      |     |     | C   | DRB1*14:08                      | WD       |          |           |
| DRB1*14:09                       | P                                        | I                                   | WD    |     | I   |      |      |     |     |     | DRB1*14:09                      | WD       |          |           |
| DRB1*14:10                       | P                                        | C                                   | I     |     | C   | WD   |      |     | C   | I   | DRB1*14:10                      | WD       |          | WD        |
| DRB1*14:11                       | P                                        | C                                   | I     |     | C   | WD   | WD   | WD  |     | WD  | DRB1*14:11                      | WD       |          | WD        |
| DRB1*14:12                       | P                                        | C                                   | I     |     | I   | WD   | C    |     |     | WD  | DRB1*14:12                      | WD       |          | WD        |
| DRB1*14:13                       | P                                        | I                                   | WD    |     |     | WD   |      | I   |     | WD  | DRB1*14:13                      | WD       |          |           |
| DRB1*14:14                       | P                                        | o                                   | o     |     |     |      |      |     |     |     | DRB1*14:14                      | WD       |          |           |
| DRB1*14:15                       | P                                        | C                                   | C     | WD  | C   | WD   | WD   |     | C   | I   | DRB1*14:15                      | WD       |          | WD        |

Supplementary Table 3d. Comparison of HLA-DRB1 P group two-field assignments among CIWD catalogs <sup>a</sup>

|                                  |                                          | 3.0.0 CIWD                          |       |     |     |      |      |     |     |     | 2.0.0 CWD                       |          | EFI CWD  | China CWD |
|----------------------------------|------------------------------------------|-------------------------------------|-------|-----|-----|------|------|-----|-----|-----|---------------------------------|----------|----------|-----------|
|                                  |                                          | Category by Population <sup>b</sup> |       |     |     |      |      |     |     |     |                                 |          |          |           |
| HLA-DRB1 IPD-<br>HLA/IMGT 3.31.0 | Nomenclature<br>Designation <sup>a</sup> | Highest<br>Frequency                | Total | AFA | API | EURO | MENA | HIS | NAM | UNK | HLA-DRB1 IPD-<br>IMGT/HLA 3.9.0 | Category | Category | Category  |
| DRB1*14:16                       | P                                        | I                                   | I     |     |     | I    | WD   |     |     | I   | DRB1*14:16                      | WD       |          |           |
| DRB1*14:17                       | P                                        | C                                   | I     |     | WD  | I    | C    | I   |     | I   | DRB1*14:17                      | C        | WD       |           |
| DRB1*14:18                       | P                                        | C                                   | I     |     | C   | WD   |      |     |     | I   | DRB1*14:18                      | C        |          | WD        |
| DRB1*14:19                       | P                                        | C                                   | I     | WD  | C   | WD   |      |     |     | WD  | DRB1*14:19                      | WD       |          |           |
| DRB1*14:20                       | P                                        | WD                                  | WD    |     |     | WD   |      |     |     | WD  | DRB1*14:20                      | WD       |          |           |
| DRB1*14:21                       | P                                        | WD                                  | WD    |     |     | WD   |      |     |     | WD  | DRB1*14:21                      | WD       |          |           |
| DRB1*14:22                       | P                                        | I                                   | WD    |     | I   |      |      |     |     | WD  | DRB1*14:22                      | WD       |          | WD        |
| DRB1*14:23                       | P                                        | WD                                  | WD    |     |     | WD   |      |     |     | WD  | DRB1*14:23                      |          |          |           |
| DRB1*14:24                       | P                                        | C                                   | I     |     |     | WD   |      | C   | C   | I   | DRB1*14:24                      | C        |          |           |
| DRB1*14:25                       | P                                        | I                                   | WD    |     | I   | WD   |      |     |     |     | DRB1*14:25                      | WD       |          | WD        |
| DRB1*14:27                       | P                                        | WD                                  | WD    |     |     |      |      |     |     |     | DRB1*14:27                      |          |          |           |
| DRB1*14:28                       | P                                        | I                                   | WD    |     | I   |      |      |     |     |     | DRB1*14:28                      | WD       |          |           |
| DRB1*14:29                       | P                                        | o                                   | o     |     |     |      |      |     |     |     | DRB1*14:29                      | WD       |          |           |
| DRB1*14:32                       | P                                        | WD                                  | WD    |     |     | WD   |      |     |     |     | DRB1*14:32                      |          |          |           |
| DRB1*14:33                       | P                                        | I                                   | WD    |     | I   | WD   | WD   |     |     | WD  | DRB1*14:33                      | WD       |          | WD        |
| DRB1*14:35                       | P                                        | WD                                  | WD    |     | WD  | WD   |      |     |     |     | DRB1*14:35                      |          |          |           |
| DRB1*14:41                       | P                                        | WD                                  | WD    |     |     |      |      | WD  |     | WD  | DRB1*14:41                      |          |          |           |
| DRB1*14:44                       | P                                        | WD                                  | WD    |     | WD  |      |      |     |     |     | DRB1*14:44                      |          |          | WD        |
| DRB1*14:46                       | P                                        | WD                                  | WD    |     |     |      |      | WD  |     |     | DRB1*14:46                      |          |          |           |
| DRB1*14:47                       | P                                        | WD                                  | WD    |     |     | WD   |      |     |     |     | DRB1*14:47                      |          |          |           |
| DRB1*14:48                       | P                                        | C                                   | WD    |     |     | WD   |      | C   | WD  | I   | DRB1*14:48                      | WD       |          |           |
| DRB1*14:49                       | P                                        | o                                   | o     |     |     |      |      |     |     |     | DRB1*14:49                      |          |          | WD        |
| DRB1*14:50                       | P                                        | WD                                  | WD    |     | WD  |      |      |     | WD  |     | DRB1*14:50                      |          |          |           |
| DRB1*14:52                       | P                                        | WD                                  | WD    |     |     |      |      | WD  |     |     | DRB1*14:52                      |          |          |           |
| DRB1*14:58                       | P                                        | WD                                  | WD    |     |     | WD   |      |     |     |     | DRB1*14:58                      |          |          |           |
| DRB1*14:60                       | P                                        | WD                                  | WD    |     |     | WD   |      |     |     |     | DRB1*14:60                      |          |          |           |
| DRB1*14:61                       | P                                        | I                                   | WD    |     | I   |      |      |     |     |     | DRB1*14:61                      | WD       |          | WD        |
| DRB1*14:68                       | P                                        | I                                   | WD    |     | I   |      |      |     |     |     | DRB1*14:68                      |          |          |           |

Supplementary Table 3d. Comparison of HLA-DRB1 P group two-field assignments among CIWD catalogs <sup>a</sup>

|                                  |                                          | 3.0.0 CIWD                          |       |     |     |      |      |     |     |     | 2.0.0 CWD                       |          | EFI CWD  | China CWD |
|----------------------------------|------------------------------------------|-------------------------------------|-------|-----|-----|------|------|-----|-----|-----|---------------------------------|----------|----------|-----------|
|                                  |                                          | Category by Population <sup>b</sup> |       |     |     |      |      |     |     |     |                                 |          |          |           |
| HLA-DRB1 IPD-<br>HLA/IMGT 3.31.0 | Nomenclature<br>Designation <sup>a</sup> | Highest<br>Frequency                | Total | AFA | API | EURO | MENA | HIS | NAM | UNK | HLA-DRB1 IPD-<br>IMGT/HLA 3.9.0 | Category | Category | Category  |
| DRB1*14:69                       | P                                        | I                                   | WD    |     | I   |      |      |     |     |     | DRB1*14:69                      |          |          |           |
| DRB1*14:70                       | P                                        | WD                                  | WD    |     |     | WD   |      |     |     | WD  | DRB1*14:70                      | WD       |          |           |
| DRB1*14:75                       | P                                        | WD                                  | WD    |     |     | WD   |      |     |     |     | DRB1*14:75                      |          |          |           |
| DRB1*14:79                       | P                                        | WD                                  | WD    |     |     |      |      |     |     |     | DRB1*14:79                      |          |          |           |
| DRB1*14:86                       | P                                        | WD                                  | WD    |     |     | WD   |      |     |     |     | DRB1*14:86                      |          |          |           |
| DRB1*14:87                       | P                                        | WD                                  | WD    |     |     | WD   |      |     |     |     | DRB1*14:87                      |          |          |           |
| DRB1*14:90                       | P                                        | WD                                  | WD    |     |     |      |      |     |     |     | DRB1*14:90                      |          |          |           |
| DRB1*14:95                       | P                                        | WD                                  | WD    |     |     | WD   |      |     |     |     | DRB1*14:95                      |          |          |           |
| DRB1*14:97                       | P                                        | WD                                  | WD    |     |     | WD   |      |     |     |     | DRB1*14:97                      |          |          |           |
| DRB1*14:99                       | P                                        | WD                                  | WD    |     |     | WD   |      |     |     |     | DRB1*14:99                      |          |          |           |
| DRB1*14:101                      | P                                        | WD                                  | WD    |     |     | WD   |      |     |     |     | DRB1*14:101                     |          |          |           |
| DRB1*14:106                      | P                                        | WD                                  | WD    |     |     |      |      | WD  |     |     | DRB1*14:106                     |          |          |           |
| DRB1*14:109                      | P                                        | WD                                  | WD    |     |     |      |      |     |     | WD  | DRB1*14:109                     |          |          |           |
| DRB1*14:110                      | P                                        | WD                                  | WD    |     |     |      | WD   |     |     |     | DRB1*14:110                     |          |          |           |
| DRB1*14:111                      | P                                        | WD                                  | WD    |     |     | WD   |      |     |     |     | DRB1*14:111                     |          |          |           |
| DRB1*14:114                      | P                                        | WD                                  | WD    | WD  |     |      |      |     |     |     | DRB1*14:114                     |          |          |           |
| DRB1*14:122                      | P                                        | WD                                  | WD    |     |     |      |      |     |     |     | DRB1*14:122                     |          |          |           |
| DRB1*14:126                      | P                                        | I                                   | WD    |     | I   |      |      |     |     |     | DRB1*14:126                     |          |          |           |
| DRB1*14:133                      | P                                        | WD                                  | WD    |     |     |      |      |     |     |     | DRB1*14:133                     |          |          |           |
| DRB1*14:141                      | P                                        | WD                                  | WD    |     | WD  |      |      |     |     |     | DRB1*14:141                     |          |          | WD        |
| DRB1*15:01                       | P                                        | C                                   | C     | C   | C   | C    | C    | C   | C   | C   | DRB1*15:01                      | C        | C        | C         |
| DRB1*15:02                       | P                                        | C                                   | C     | C   | C   | C    | C    | C   | C   | C   | DRB1*15:02                      | C        | C        | C         |
| DRB1*15:03                       | P                                        | C                                   | C     | C   | C   | C    | C    | C   | C   | C   | DRB1*15:03                      | C        | C        | WD        |
| DRB1*15:04                       | P                                        | C                                   | C     | WD  | C   | I    | WD   | I   | C   | I   | DRB1*15:04                      | C        | WD       | C         |
| DRB1*15:05                       | P                                        | WD                                  | WD    |     |     | WD   |      |     |     |     | DRB1*15:05                      |          |          | WD        |
| DRB1*15:06                       | P                                        | C                                   | C     | WD  | C   | I    | C    | I   | C   | C   | DRB1*15:06                      | C        |          | WD        |
| DRB1*15:07                       | P                                        | I                                   | I     | WD  | WD  | I    | WD   |     |     | WD  | DRB1*15:07                      | WD       |          | WD        |
| DRB1*15:10                       | P                                        | WD                                  | WD    |     |     | WD   |      |     |     |     | DRB1*15:10                      | WD       |          |           |

Supplementary Table 3d. Comparison of HLA-DRB1 P group two-field assignments among CIWD catalogs <sup>a</sup>

| HLA-DRB1 IPD-<br>HLA/IMGT 3.31.0 | Nomenclature<br>Designation <sup>a</sup> | 3.0.0 CIWD           |       |     |     |      |      |     |     |     | 2.0.0 CWD                       |          | EFI CWD  | China CWD |
|----------------------------------|------------------------------------------|----------------------|-------|-----|-----|------|------|-----|-----|-----|---------------------------------|----------|----------|-----------|
|                                  |                                          | Highest<br>Frequency | Total | AFA | API | EURO | MENA | HIS | NAM | UNK | HLA-DRB1 IPD-<br>IMGT/HLA 3.9.0 | Category | Category | Category  |
|                                  |                                          |                      |       |     |     |      |      |     |     |     |                                 |          |          |           |
| DRB1*15:11                       | P                                        | I                    | WD    |     | I   | WD   | WD   |     |     | WD  | DRB1*15:11                      | WD       |          | WD        |
| DRB1*15:13                       | P                                        | WD                   | WD    |     |     | WD   |      |     |     |     | DRB1*15:13                      |          |          |           |
| DRB1*15:14                       | P                                        | I                    | WD    |     | I   | WD   |      |     |     | I   | DRB1*15:14                      | WD       |          |           |
| DRB1*15:15                       | P                                        | WD                   | WD    |     | WD  | WD   |      |     |     |     | DRB1*15:15                      |          |          |           |
| DRB1*15:18                       | P                                        | I                    | I     |     |     | I    |      |     |     |     | DRB1*15:18                      | WD       |          |           |
| DRB1*15:20                       | P                                        | I                    | WD    |     | I   | WD   |      |     |     |     | DRB1*15:20                      | WD       |          |           |
| DRB1*15:22                       | P                                        | WD                   | WD    | WD  |     | WD   |      |     |     | WD  | DRB1*15:22                      | WD       |          |           |
| DRB1*15:23                       | P                                        | WD                   | WD    | WD  |     |      |      |     |     |     | DRB1*15:23                      | WD       |          |           |
| DRB1*15:24                       | P                                        | I                    | WD    |     |     | WD   |      |     |     | I   | DRB1*15:24                      | WD       |          |           |
| DRB1*15:31                       | P                                        | WD                   | WD    |     | WD  |      |      |     |     |     | DRB1*15:31                      |          |          |           |
| DRB1*15:33                       | P                                        | WD                   | WD    |     |     | WD   |      |     |     |     | DRB1*15:33                      |          |          |           |
| DRB1*15:36                       | P                                        | WD                   | WD    |     |     | WD   |      |     |     |     | DRB1*15:36                      |          |          |           |
| DRB1*15:37                       | P                                        | WD                   | WD    |     |     | WD   |      |     |     |     | DRB1*15:37                      |          |          |           |
| DRB1*15:38                       | P                                        | I                    | WD    |     | I   |      |      |     |     |     | DRB1*15:38                      | WD       |          |           |
| DRB1*15:40                       | P                                        | WD                   | WD    |     |     | WD   |      |     |     |     | DRB1*15:40                      |          |          |           |
| DRB1*15:47                       | P                                        | WD                   | WD    |     | WD  |      |      |     |     |     | DRB1*15:47                      |          |          |           |
| DRB1*15:49                       | P                                        | o                    | o     |     |     |      |      |     |     |     | DRB1*15:49                      |          |          | WD        |
| DRB1*15:55                       | P                                        | WD                   | WD    |     |     | WD   |      |     |     |     | DRB1*15:55                      |          |          |           |
| DRB1*15:56                       | P                                        | I                    | WD    |     |     |      | WD   |     |     | I   | DRB1*15:56                      |          |          |           |
| DRB1*15:57                       | P                                        | WD                   | WD    | WD  |     |      |      |     |     |     | DRB1*15:57                      |          |          |           |
| DRB1*15:61                       | P                                        | WD                   | WD    |     |     |      |      |     |     |     | DRB1*15:61                      |          |          |           |
| DRB1*15:65                       | P                                        | WD                   | WD    |     |     | WD   |      |     |     |     | DRB1*15:65                      |          |          |           |
| DRB1*15:67                       | P                                        | WD                   | WD    |     |     | WD   |      |     |     |     | DRB1*15:67                      |          |          |           |
| DRB1*15:68                       | P                                        | I                    | WD    |     | I   |      |      |     |     |     | DRB1*15:68                      |          |          |           |
| DRB1*15:93                       | P                                        | WD                   | WD    |     |     | WD   |      |     |     |     | DRB1*15:93                      |          |          |           |
| DRB1*15:96                       | P                                        | WD                   | WD    |     |     | WD   |      |     |     |     | DRB1*15:96                      |          |          |           |
| DRB1*16:01                       | P                                        | C                    | C     | C   | C   | C    | C    | C   | C   | C   | DRB1*16:01                      | C        | C        | WD        |
| DRB1*16:02                       | P                                        | C                    | C     | C   | C   | C    | C    | C   | C   | C   | DRB1*16:02                      | C        | C        | C         |

Supplementary Table 3d. Comparison of HLA-DRB1 P group two-field assignments among CIWD catalogs <sup>a</sup>

|                                  |                                          | 3.0.0 CIWD                          |       |     |     |      |      |     |     |     | 2.0.0 CWD                       |          | EFI CWD  | China CWD |
|----------------------------------|------------------------------------------|-------------------------------------|-------|-----|-----|------|------|-----|-----|-----|---------------------------------|----------|----------|-----------|
|                                  |                                          | Category by Population <sup>b</sup> |       |     |     |      |      |     |     |     |                                 |          |          |           |
| HLA-DRB1 IPD-<br>HLA/IMGT 3.31.0 | Nomenclature<br>Designation <sup>a</sup> | Highest<br>Frequency                | Total | AFA | API | EURO | MENA | HIS | NAM | UNK | HLA-DRB1 IPD-<br>IMGT/HLA 3.9.0 | Category | Category | Category  |
| DRB1*16:04                       | P                                        | WD                                  | WD    |     |     | WD   |      |     |     | WD  | DRB1*16:04                      | C        |          |           |
| DRB1*16:05                       | P                                        | C                                   | I     |     | I   | I    | C    |     |     | I   | DRB1*16:05                      | WD       |          | WD        |
| DRB1*16:07                       | P                                        | I                                   | I     |     |     | WD   | WD   | I   |     | I   | DRB1*16:07                      | C        |          |           |
| DRB1*16:08                       | P                                        | I                                   | WD    |     |     |      |      |     |     | I   | DRB1*16:08                      |          |          |           |
| DRB1*16:09                       | P                                        | WD                                  | WD    |     |     | WD   | WD   |     |     |     | DRB1*16:09                      |          |          | WD        |
| DRB1*16:10                       | P                                        | I                                   | WD    |     | I   |      |      |     |     |     | DRB1*16:10                      | WD       |          | WD        |
| DRB1*16:12                       | P                                        | I                                   | WD    |     |     |      |      | I   |     |     | DRB1*16:12                      | WD       |          |           |
| DRB1*16:15                       | P                                        | WD                                  | WD    |     |     | WD   |      |     |     |     | DRB1*16:15                      |          |          |           |
| DRB1*16:22                       | P                                        | WD                                  | WD    |     |     |      |      | WD  |     |     | DRB1*16:22                      |          |          |           |

C, common; I, intermediate; WD, well-documented

<sup>a</sup> Alleles observed at least five times in any population group in the current dataset are included in this table. The exception are alleles that were observed in previous catalogs but that are not present or are observed less than five times. Note that this two-field designation is the equivalent of a "P" assignment so that alleles within a P group that encode proteins that differ outside of the antigen recognition domain are not listed separately (e.g., DRB1\*14:54 is within the DRB1\*14:01P assignment and is not listed in this table even though it was categorized as common in 2.0.0 CWD). The table does not list all alleles from IPD-IMGT/HLA version 3.31.0.

<sup>b</sup> Population groups include: AFA (African/African American), API (Asian/Pacific Islands), EURO (European/European descent), MENA (Middle East/North Coast of Africa), HIS (South or Central America/Hispanic/Latino), NAM (Native American populations) and UNK (unknown/not asked/multiple ancestries/other). Total is the overall population i.e., all groups combined. Highest frequency is the highest CIWD designation among all the individual groups.

<sup>c</sup> Not-CIWD, o.

Supplementary Table 3e. Comparison of HLA-DRB3/4/5 P group two-field assignments among CIWD catalogs <sup>a</sup>

|                                        |                                          | 3.0.0 CIWD                          |       |     |     |      |      |     |     |     | 2.0.0 CWD                           |          | EFI CWD       | China CWD |
|----------------------------------------|------------------------------------------|-------------------------------------|-------|-----|-----|------|------|-----|-----|-----|-------------------------------------|----------|---------------|-----------|
|                                        |                                          | Category by Population <sup>b</sup> |       |     |     |      |      |     |     |     |                                     |          |               |           |
| HLA-DRB3/4/5<br>IPD-HLA/IMGT<br>3.31.0 | Nomenclature<br>Designation <sup>a</sup> | Highest<br>Frequency                | Total | AFA | API | EURO | MENA | HIS | NAM | UNK | HLA-DRB3/4/5 IPD-<br>IMGT/HLA 3.9.0 | Category | Category      | Category  |
| DRB3*01:01                             | P                                        | WD                                  | WD    | WD  | WD  | WD   | WD   | WD  | WD  | WD  | DRB3*01:01                          | C        | not available |           |
| DRB3*01:02                             | P                                        | WD                                  | WD    |     |     | WD   |      |     |     | WD  | DRB3*01:02                          | WD       |               |           |
| DRB3*01:03                             | P                                        | o <sup>d</sup>                      | o     |     |     |      |      |     |     |     | DRB3*01:03                          | WD       |               |           |
| DRB3*01:05                             | P                                        | WD                                  | WD    |     |     |      |      | WD  |     |     | DRB3*01:05                          |          |               |           |
| DRB3*01:06                             | P                                        | WD                                  | WD    |     |     |      |      | WD  |     |     | DRB3*01:06                          |          |               |           |
| DRB3*01:11                             | P                                        | WD                                  | WD    |     | WD  |      |      |     |     |     | DRB3*01:11                          |          |               |           |
| DRB3*01:13                             | P                                        | WD                                  | WD    |     | WD  |      |      |     |     |     | DRB3*01:13                          |          |               |           |
| DRB3*01:35                             | P                                        | WD                                  | WD    |     |     |      |      | WD  |     |     | DRB3*01:35                          |          |               |           |
| DRB3*02:01                             | P                                        | WD                                  | WD    | WD  | WD  | WD   | WD   | WD  | WD  | WD  | DRB3*02:01                          | C        |               |           |
| DRB3*02:02                             | P                                        | WD                                  | WD    | WD  | WD  | WD   | WD   | WD  | WD  | WD  | DRB3*02:02                          | C        |               |           |
| DRB3*02:03                             | P                                        | WD                                  | WD    |     |     | WD   |      |     |     | WD  | DRB3*02:03                          | WD       |               |           |
| DRB3*02:04                             | P                                        | WD                                  | WD    |     |     | WD   |      |     |     |     | DRB3*02:04                          |          |               |           |
| DRB3*02:05                             | P                                        | WD                                  | WD    |     |     | WD   |      | WD  |     |     | DRB3*02:05                          |          |               |           |
| DRB3*02:06                             | P                                        | WD                                  | WD    |     |     | WD   |      |     |     |     | DRB3*02:06                          | WD       |               |           |
| DRB3*02:07                             | P                                        | WD                                  | WD    | WD  |     |      |      |     |     | WD  | DRB3*02:07                          |          |               |           |
| DRB3*02:09                             | P                                        | WD                                  | WD    |     |     | WD   |      |     |     |     | DRB3*02:09                          |          |               |           |
| DRB3*02:10                             | P                                        | WD                                  | WD    | WD  | WD  | WD   |      | WD  |     | WD  | DRB3*02:10                          | C        |               |           |
| DRB3*02:11                             | P                                        | WD                                  | WD    |     |     | WD   |      | WD  |     | WD  | DRB3*02:11                          | WD       |               |           |
| DRB3*02:12                             | P                                        | WD                                  | WD    |     |     | WD   |      |     |     |     | DRB3*02:12                          |          |               |           |
| DRB3*02:13                             | P                                        | WD                                  | WD    |     |     | WD   |      |     |     |     | DRB3*02:13                          |          |               |           |
| DRB3*02:16                             | P                                        | WD                                  | WD    |     |     | WD   |      |     |     |     | DRB3*02:16                          |          |               |           |
| DRB3*02:17                             | P                                        | WD                                  | WD    |     |     | WD   |      | WD  |     | WD  | DRB3*02:17                          | WD       |               |           |
| DRB3*02:19                             | P                                        | WD                                  | WD    |     |     | WD   |      |     |     |     | DRB3*02:19                          |          |               |           |
| DRB3*02:20                             | P                                        | WD                                  | WD    |     |     |      |      |     |     |     | DRB3*02:20                          |          |               |           |
| DRB3*02:21                             | P                                        | WD                                  | WD    |     |     | WD   |      | WD  |     |     | DRB3*02:21                          |          |               |           |
| DRB3*02:22                             | P                                        | WD                                  | WD    |     |     | WD   |      |     |     |     | DRB3*02:22                          |          |               |           |
| DRB3*02:23                             | P                                        | WD                                  | WD    |     |     | WD   |      |     |     |     | DRB3*02:23                          |          |               |           |
| DRB3*02:25                             | P                                        | WD                                  | WD    |     |     | WD   |      |     |     |     | DRB3*02:25                          |          |               |           |

Supplementary Table 3e. Comparison of HLA-DRB3/4/5 P group two-field assignments among CIWD catalogs <sup>a</sup>

|                                        |                                          | 3.0.0 CIWD                          |       |     |     |      |      |     |     |     | 2.0.0 CWD                           |          | EFI CWD  | China CWD |
|----------------------------------------|------------------------------------------|-------------------------------------|-------|-----|-----|------|------|-----|-----|-----|-------------------------------------|----------|----------|-----------|
|                                        |                                          | Category by Population <sup>b</sup> |       |     |     |      |      |     |     |     |                                     |          |          |           |
| HLA-DRB3/4/5<br>IPD-HLA/IMGT<br>3.31.0 | Nomenclature<br>Designation <sup>a</sup> | Highest<br>Frequency                | Total | AFA | API | EURO | MENA | HIS | NAM | UNK | HLA-DRB3/4/5 IPD-<br>IMGT/HLA 3.9.0 | Category | Category | Category  |
| DRB3*02:32                             | P                                        | WD                                  | WD    |     | WD  | WD   |      |     |     |     | DRB3*02:32                          |          |          |           |
| DRB3*02:51                             | P                                        | WD                                  | WD    |     |     |      |      | WD  |     |     | DRB3*02:51                          |          |          |           |
| DRB3*03:01                             | P                                        | WD                                  | WD    | WD  | WD  | WD   | WD   | WD  | WD  | WD  | DRB3*03:01                          | C        |          |           |
| DRB3*03:02                             | P                                        | WD                                  | WD    |     |     | WD   |      |     |     |     | DRB3*03:02                          |          |          |           |
| DRB3*03:03                             | P                                        | WD                                  | WD    |     |     |      |      |     |     |     | DRB3*03:03                          |          |          |           |
| DRB4*01:01                             | P                                        | WD                                  | WD    | WD  | WD  | WD   | WD   | WD  | WD  | WD  | DRB4*01:01                          | C        |          |           |
| DRB4*01:02                             | P                                        | WD                                  | WD    |     | WD  | WD   | WD   | WD  | WD  | WD  | DRB4*01:02                          | C        |          |           |
| DRB4*01:03N <sup>c</sup>               | N                                        | WD                                  | WD    | WD  | WD  | WD   | WD   | WD  | WD  | WD  | DRB4*01:03N                         | C        |          |           |
| DRB4*01:04                             | P                                        | WD                                  | WD    |     | WD  |      |      |     |     |     | DRB4*01:04                          |          |          |           |
| DRB4*01:05                             | P                                        | WD                                  | WD    |     |     | WD   |      | WD  |     | WD  | DRB4*01:05                          |          |          |           |
| DRB4*01:07                             | P                                        | WD                                  | WD    |     |     | WD   |      |     |     |     | DRB4*01:07                          |          |          |           |
| DRB4*01:16N                            | N                                        | WD                                  | WD    |     |     |      |      |     |     |     | DRB4*01:16N                         |          |          |           |
| DRB4*01:17                             | P                                        | WD                                  | WD    |     |     | WD   |      |     |     |     | DRB4*01:17                          |          |          |           |
| DRB4*02:01N                            | N                                        | WD                                  | WD    |     |     | WD   |      |     |     |     | DRB4*02:01N                         | C        |          |           |
| DRB4*03:01N                            | N                                        | WD                                  | WD    |     |     | WD   |      |     |     |     | DRB4*03:01N                         | WD       |          |           |
| DRB5*01:01                             | P                                        | WD                                  | WD    | WD  | WD  | WD   | WD   | WD  | WD  | WD  | DRB5*01:01                          | C        |          |           |
| DRB5*01:02                             | P                                        | WD                                  | WD    | WD  | WD  | WD   | WD   | WD  | WD  | WD  | DRB5*01:02                          | C        |          |           |
| DRB5*01:03                             | P                                        | WD                                  | WD    | WD  | WD  |      |      |     |     | WD  | DRB5*01:03                          | C        |          |           |
| DRB5*01:04                             | P                                        | WD                                  | WD    |     |     |      |      |     |     |     | DRB5*01:04                          |          |          |           |
| DRB5*01:05                             | P                                        | WD                                  | WD    |     |     | WD   |      |     |     |     | DRB5*01:05                          |          |          |           |
| DRB5*01:06                             | P                                        | WD                                  | WD    |     |     |      |      |     |     |     | DRB5*01:06                          |          |          |           |
| DRB5*01:08N                            | N                                        | WD                                  | WD    | WD  | WD  |      |      |     |     | WD  | DRB5*01:08N                         | C        |          |           |
| DRB5*01:09                             | P                                        | WD                                  | WD    |     |     |      |      |     |     |     | DRB5*01:09                          |          |          |           |
| DRB5*01:10N                            | N                                        | WD                                  | WD    |     | WD  | WD   | WD   | WD  |     | WD  | DRB5*01:10N                         | WD       |          |           |
| DRB5*01:11                             | P                                        | WD                                  | WD    |     | WD  |      |      |     |     |     | DRB5*01:11                          |          |          |           |
| DRB5*01:15                             | P                                        | WD                                  | WD    |     | WD  |      |      |     |     |     | DRB5*01:15                          |          |          |           |
| DRB5*01:20                             | P                                        | WD                                  | WD    |     |     |      |      |     |     |     | DRB5*01:20                          |          |          |           |
| DRB5*02:02                             | P                                        | WD                                  | WD    | WD  | WD  | WD   | WD   | WD  | WD  | WD  | DRB5*02:02                          | C        |          |           |



**Supplementary Table 3e. Comparison of HLA-DRB3/4/5 P group two-field assignments among CIWD catalogs <sup>a</sup>**

|                                        |                                          | 3.0.0 CIWD                          |       |     |     |      |      |     |     |     | 2.0.0 CWD                           |          | EFI CWD  | China CWD |
|----------------------------------------|------------------------------------------|-------------------------------------|-------|-----|-----|------|------|-----|-----|-----|-------------------------------------|----------|----------|-----------|
|                                        |                                          | Category by Population <sup>b</sup> |       |     |     |      |      |     |     |     |                                     |          |          |           |
| HLA-DRB3/4/5<br>IPD-HLA/IMGT<br>3.31.0 | Nomenclature<br>Designation <sup>a</sup> | Highest<br>Frequency                | Total | AFA | API | EURO | MENA | HIS | NAM | UNK | HLA-DRB3/4/5 IPD-<br>IMGT/HLA 3.9.0 | Category | Category | Category  |
| DRB5*02:03                             | P                                        | WD                                  | WD    |     | WD  | WD   |      | WD  |     | WD  | DRB5*02:03                          | WD       |          |           |
| DRB5*02:04                             | P                                        | WD                                  | WD    |     |     | WD   |      |     |     |     | DRB5*02:04                          |          |          |           |

C, common; WD, well-documented

<sup>a</sup> Alleles observed at least five times in any population group in the current dataset are included in this table. The exception are alleles that were observed in previous catalogs but that are not present or are observed less than five times. Note that this two-field designation is the equivalent of a "P" assignment so that alleles within a P group that encode a protein that differs outside of the antigen recognition domain are not listed separately (e.g., DRB4\*01:03 is within the DRB4\*01:01P assignment and is not listed in this table even though it was categorized as common in 2.0.0 CWD). The table does not list all alleles from IPD-IMGT/HLA version 3.31.0.

<sup>b</sup> Population groups include: AFA (African/African American), API (Asian/Pacific Islander), EURO (European/European descent), MENA (Middle East/North Coast of Africa), HIS (Hispanic), NAM (Native American) and UNK (unknown, multiple ancestries or other). Total is the overall population i.e., all groups combined. Highest frequency is the highest CIWD designation among all the individual groups.

<sup>c</sup> Any non-expressed alleles which are excluded from the P group are listed. For example, DRB4\*01:03:01:02N (sometimes labeled as DRB4\*01:03N) is within the DRB4\*01:01P group but is listed separately because it is not expressed.

<sup>d</sup> Not-CIWD, o.

Supplementary Table 3f. Comparison of HLA-DQB1 P group two-field assignments among CIWD catalogs <sup>a</sup>

| HLA-DQB1 IPD-<br>HLA/IMGT 3.31.0 | Nomenclature<br>Designation <sup>a</sup> | 3.0.0 CIWD                          |       |     |     |      |      |     |     |     | 2.0.0 CWD                          |          | EFI CWD  | China CWD |
|----------------------------------|------------------------------------------|-------------------------------------|-------|-----|-----|------|------|-----|-----|-----|------------------------------------|----------|----------|-----------|
|                                  |                                          | Category by Population <sup>b</sup> |       |     |     |      |      |     |     |     | HLA-DQB1 IPD-<br>IMGT/HLA<br>3.9.0 | Category | Category | Category  |
|                                  |                                          | Highest<br>Frequency                | Total | AFA | API | EURO | MENA | HIS | NAM | UNK |                                    |          |          |           |
| DQB1*02:01                       | P                                        | C                                   | C     | C   | C   | C    | C    | C   | C   | C   | DQB1*02:01                         | C        | C        | C         |
| DQB1*02:03                       | P                                        | C                                   | I     | C   |     | WD   |      | I   | C   | C   | DQB1*02:03                         | C        | WD       | WD        |
| DQB1*02:05                       | P                                        | WD                                  | WD    |     |     | WD   |      |     |     | WD  | DQB1*02:05                         |          |          |           |
| DQB1*02:07                       | P                                        | C                                   | I     |     | C   | WD   |      |     |     | WD  | DQB1*02:07                         |          |          |           |
| DQB1*02:12                       | P                                        | WD                                  | WD    |     |     | WD   | WD   |     |     | WD  | DQB1*02:12                         |          | WD       | WD        |
| DQB1*02:14                       | P                                        | I                                   | I     |     |     | I    |      | WD  |     | I   | DQB1*02:14                         |          |          |           |
| DQB1*02:16                       | P                                        | WD                                  | WD    |     |     | WD   |      |     |     |     | DQB1*02:16                         |          |          |           |
| DQB1*02:17                       | P                                        | WD                                  | WD    |     |     | WD   |      |     |     |     | DQB1*02:17                         |          |          |           |
| DQB1*02:18N                      | N                                        | WD                                  | WD    |     |     | WD   |      |     |     |     | DQB1*02:18N                        |          | WD       |           |
| DQB1*02:19                       | P                                        | I                                   | WD    |     |     | WD   | WD   |     |     | I   | DQB1*02:19                         |          |          |           |
| DQB1*02:20N                      | N                                        | WD                                  | WD    |     |     | WD   |      |     |     |     | DQB1*02:20N                        |          | WD       |           |
| DQB1*02:21                       | P                                        | WD                                  | WD    |     |     | WD   |      |     |     |     | DQB1*02:21                         |          | WD       |           |
| DQB1*02:23                       | P                                        | WD                                  | WD    |     |     | WD   |      |     |     |     | DQB1*02:23                         |          |          |           |
| DQB1*02:24                       | P                                        | WD                                  | WD    |     |     | WD   |      |     |     |     | DQB1*02:24                         |          | WD       |           |
| DQB1*02:26                       | P                                        | I                                   | WD    |     |     | WD   |      |     |     | I   | DQB1*02:26                         |          |          |           |
| DQB1*02:27                       | P                                        | WD                                  | WD    |     |     | WD   |      |     |     |     | DQB1*02:27                         |          | WD       |           |
| DQB1*02:28                       | P                                        | WD                                  | WD    |     |     | WD   |      |     |     |     | DQB1*02:28                         |          |          |           |
| DQB1*02:29                       | P                                        | WD                                  | WD    |     |     | WD   |      |     |     | WD  | DQB1*02:29                         |          |          |           |
| DQB1*02:30                       | P                                        | WD                                  | WD    |     |     | WD   |      |     |     |     | DQB1*02:30                         |          | WD       |           |
| DQB1*02:33                       | P                                        | WD                                  | WD    |     |     | WD   |      |     |     |     | DQB1*02:33                         |          |          |           |
| DQB1*02:46                       | P                                        | WD                                  | WD    |     |     | WD   |      |     |     |     | DQB1*02:46                         |          |          |           |
| DQB1*02:53Q                      | Q                                        | I                                   | I     |     |     | I    |      |     |     |     | DQB1*02:53Q                        |          | WD       |           |
| DQB1*02:63                       | P                                        | WD                                  | WD    |     |     | WD   |      |     |     |     | DQB1*02:63                         |          |          |           |
| DQB1*03:01                       | P                                        | C                                   | C     | C   | C   | C    | C    | C   | C   | C   | DQB1*03:01                         | C        | C        | C         |
| DQB1*03:02                       | P                                        | C                                   | C     | C   | C   | C    | C    | C   | C   | C   | DQB1*03:02                         | C        | C        | C         |
| DQB1*03:03                       | P                                        | C                                   | C     | C   | C   | C    | C    | C   | C   | C   | DQB1*03:03                         | C        | C        | C         |
| DQB1*03:04                       | P                                        | C                                   | C     | C   | C   | C    | C    | C   | C   | C   | DQB1*03:04                         | C        | C        | WD        |

Supplementary Table 3f. Comparison of HLA-DQB1 P group two-field assignments among CIWD catalogs <sup>a</sup>

| HLA-DQB1 IPD-<br>HLA/IMGT 3.31.0 | Nomenclature<br>Designation <sup>a</sup> | 3.0.0 CIWD                          |       |     |     |      |      |     |     |     | 2.0.0 CWD                          |          | EFI CWD  | China CWD |
|----------------------------------|------------------------------------------|-------------------------------------|-------|-----|-----|------|------|-----|-----|-----|------------------------------------|----------|----------|-----------|
|                                  |                                          | Category by Population <sup>b</sup> |       |     |     |      |      |     |     |     | HLA-DQB1 IPD-<br>IMGT/HLA<br>3.9.0 | Category | Category | Category  |
|                                  |                                          | Highest<br>Frequency                | Total | AFA | API | EURO | MENA | HIS | NAM | UNK |                                    |          |          |           |
| DQB1*03:05                       | P                                        | C                                   | C     | C   | C   | C    | C    | C   | C   | C   | DQB1*03:05                         | C        | C        | WD        |
| DQB1*03:06                       | P                                        | WD                                  | WD    |     |     |      |      |     |     |     | DQB1*03:06                         |          |          |           |
| DQB1*03:07                       | P                                        | o <sup>c</sup>                      | o     |     |     |      |      |     |     |     | DQB1*03:07                         |          | WD       |           |
| DQB1*03:08                       | P                                        | I                                   | WD    |     |     | WD   |      |     |     | I   | DQB1*03:08                         |          | WD       |           |
| DQB1*03:10                       | P                                        | WD                                  | WD    |     | WD  | WD   |      |     |     |     | DQB1*03:10                         |          | WD       |           |
| DQB1*03:11                       | P                                        | C                                   | I     |     | C   |      |      |     |     | WD  | DQB1*03:11                         |          |          |           |
| DQB1*03:12                       | P                                        | I                                   | I     |     |     | I    |      |     |     | WD  | DQB1*03:12                         |          | C        |           |
| DQB1*03:13                       | P                                        | C                                   | I     |     | C   | WD   |      |     |     | I   | DQB1*03:13                         | WD       | WD       | WD        |
| DQB1*03:14                       | P                                        | I                                   | WD    |     | I   | WD   |      | I   |     |     | DQB1*03:14                         |          |          | WD        |
| DQB1*03:16                       | P                                        | C                                   | WD    | C   |     |      |      |     |     | WD  | DQB1*03:16                         |          |          |           |
| DQB1*03:17                       | P                                        | I                                   | WD    |     | I   |      |      |     |     |     | DQB1*03:17                         |          |          | WD        |
| DQB1*03:18                       | P                                        | WD                                  | WD    |     |     | WD   |      |     |     | WD  | DQB1*03:18                         |          |          |           |
| DQB1*03:20                       | P                                        | WD                                  | WD    |     |     | WD   |      |     |     |     | DQB1*03:20                         |          |          |           |
| DQB1*03:25                       | P                                        | C                                   | WD    |     |     | WD   |      | I   | C   | I   | DQB1*03:25                         |          |          |           |
| DQB1*03:26                       | P                                        | I                                   | WD    |     | I   |      |      |     |     |     | DQB1*03:26                         |          |          | WD        |
| DQB1*03:27                       | P                                        | o                                   | o     |     |     |      |      |     |     |     | DQB1*03:27                         |          |          | WD        |
| DQB1*03:30                       | P                                        | WD                                  | WD    |     |     | WD   |      |     |     |     | DQB1*03:30                         |          | WD       | WD        |
| DQB1*03:34                       | P                                        | o                                   | o     |     |     |      |      |     |     |     | DQB1*03:34                         |          |          | WD        |
| DQB1*03:36                       | P                                        | WD                                  | WD    |     |     | WD   |      |     |     |     | DQB1*03:36                         |          |          |           |
| DQB1*03:37                       | P                                        | I                                   | WD    |     |     | WD   |      |     |     | I   | DQB1*03:37                         |          | WD       |           |
| DQB1*03:38                       | P                                        | o                                   | o     |     |     |      |      |     |     |     | DQB1*03:38                         |          |          | WD        |
| DQB1*03:40                       | P                                        | WD                                  | WD    |     |     | WD   |      |     |     |     | DQB1*03:40                         |          |          |           |
| DQB1*03:44                       | P                                        | o                                   | o     |     |     |      |      |     |     |     | DQB1*03:44                         |          |          | WD        |
| DQB1*03:45                       | P                                        | WD                                  | WD    |     |     | WD   |      |     |     |     | DQB1*03:45                         |          |          |           |
| DQB1*03:48                       | P                                        | WD                                  | WD    |     |     | WD   |      |     |     |     | DQB1*03:48                         |          |          |           |
| DQB1*03:53                       | P                                        | WD                                  | WD    |     |     |      | WD   |     |     |     | DQB1*03:53                         |          |          |           |
| DQB1*03:54                       | P                                        | WD                                  | WD    |     |     |      |      |     |     |     | DQB1*03:54                         |          |          |           |

Supplementary Table 3f. Comparison of HLA-DQB1 P group two-field assignments among CIWD catalogs <sup>a</sup>

| HLA-DQB1 IPD-<br>HLA/IMGT 3.31.0 | Nomenclature<br>Designation <sup>a</sup> | 3.0.0 CIWD                          |       |     |     |      |      |     |     |     | 2.0.0 CWD                          |          | EFI CWD  | China CWD |
|----------------------------------|------------------------------------------|-------------------------------------|-------|-----|-----|------|------|-----|-----|-----|------------------------------------|----------|----------|-----------|
|                                  |                                          | Category by Population <sup>b</sup> |       |     |     |      |      |     |     |     | HLA-DQB1 IPD-<br>IMGT/HLA<br>3.9.0 | Category | Category | Category  |
|                                  |                                          | Highest<br>Frequency                | Total | AFA | API | EURO | MENA | HIS | NAM | UNK |                                    |          |          |           |
| DQB1*03:55                       | P                                        | WD                                  | WD    |     |     | WD   |      |     |     | WD  | DQB1*03:55                         |          |          |           |
| DQB1*03:56                       | P                                        | WD                                  | WD    |     |     | WD   |      |     |     |     | DQB1*03:56                         |          |          |           |
| DQB1*03:58                       | P                                        | I                                   | WD    |     |     | WD   |      |     |     | I   | DQB1*03:58                         |          |          |           |
| DQB1*03:59                       | P                                        | WD                                  | WD    |     |     | WD   |      |     |     |     | DQB1*03:59                         |          |          |           |
| DQB1*03:62                       | P                                        | WD                                  | WD    |     | WD  |      |      |     |     |     | DQB1*03:62                         |          |          |           |
| DQB1*03:63                       | P                                        | WD                                  | WD    |     |     | WD   |      |     |     |     | DQB1*03:63                         |          |          |           |
| DQB1*03:64                       | P                                        | WD                                  | WD    |     |     | WD   |      |     |     |     | DQB1*03:64                         |          |          |           |
| DQB1*03:65                       | P                                        | WD                                  | WD    |     |     | WD   |      |     |     |     | DQB1*03:65                         |          |          |           |
| DQB1*03:67                       | P                                        | WD                                  | WD    |     |     | WD   |      |     |     | WD  | DQB1*03:67                         |          |          |           |
| DQB1*03:68                       | P                                        | WD                                  | WD    |     |     | WD   |      |     |     |     | DQB1*03:68                         |          |          |           |
| DQB1*03:69                       | P                                        | WD                                  | WD    |     |     |      |      |     |     |     | DQB1*03:69                         |          |          |           |
| DQB1*03:70                       | P                                        | I                                   | WD    |     |     |      |      | I   |     |     | DQB1*03:70                         |          |          |           |
| DQB1*03:72                       | P                                        | I                                   | WD    |     |     |      |      | I   |     | I   | DQB1*03:72                         |          |          |           |
| DQB1*03:76                       | P                                        | WD                                  | WD    |     |     | WD   |      |     |     |     | DQB1*03:76                         |          |          |           |
| DQB1*03:78                       | P                                        | WD                                  | WD    |     | WD  |      |      |     |     |     | DQB1*03:78                         |          |          |           |
| DQB1*03:81                       | P                                        | WD                                  | WD    |     |     | WD   |      |     |     |     | DQB1*03:81                         |          |          |           |
| DQB1*03:93                       | P                                        | o                                   | o     |     |     |      |      |     |     |     | DQB1*03:93                         |          |          | WD        |
| DQB1*03:105                      | P                                        | I                                   | WD    |     |     |      |      | I   |     |     | DQB1*03:105                        |          |          |           |
| DQB1*03:106                      | P                                        | I                                   | WD    |     | WD  |      |      | I   |     |     | DQB1*03:106                        |          |          |           |
| DQB1*03:109                      | P                                        | WD                                  | WD    |     |     | WD   |      |     |     |     | DQB1*03:109                        |          |          |           |
| DQB1*03:114                      | P                                        | WD                                  | WD    |     |     | WD   |      |     |     |     | DQB1*03:114                        |          |          |           |
| DQB1*03:118N                     | N                                        | WD                                  | WD    |     | WD  |      |      |     |     |     | DQB1*03:118N                       |          |          |           |
| DQB1*03:121                      | P                                        | WD                                  | WD    |     |     |      |      |     |     |     | DQB1*03:121                        |          |          |           |
| DQB1*03:126                      | P                                        | WD                                  | WD    |     |     |      |      |     |     |     | DQB1*03:126                        |          |          |           |
| DQB1*03:127                      | P                                        | WD                                  | WD    |     |     |      |      |     |     |     | DQB1*03:127                        |          |          |           |
| DQB1*03:130                      | P                                        | WD                                  | WD    |     |     | WD   |      |     |     |     | DQB1*03:130                        |          |          |           |
| DQB1*03:132                      | P                                        | I                                   | WD    |     |     |      |      | I   |     |     | DQB1*03:132                        |          |          |           |

Supplementary Table 3f. Comparison of HLA-DQB1 P group two-field assignments among CIWD catalogs <sup>a</sup>

| HLA-DQB1 IPD-<br>HLA/IMGT 3.31.0 | Nomenclature<br>Designation <sup>a</sup> | 3.0.0 CIWD                          |       |     |     |      |      |     |     |     | 2.0.0 CWD                          |          | EFI CWD  | China CWD |
|----------------------------------|------------------------------------------|-------------------------------------|-------|-----|-----|------|------|-----|-----|-----|------------------------------------|----------|----------|-----------|
|                                  |                                          | Category by Population <sup>b</sup> |       |     |     |      |      |     |     |     | HLA-DQB1 IPD-<br>IMGT/HLA<br>3.9.0 | Category | Category | Category  |
|                                  |                                          | Highest<br>Frequency                | Total | AFA | API | EURO | MENA | HIS | NAM | UNK |                                    |          |          |           |
| DQB1*03:134                      | P                                        | WD                                  | WD    |     |     | WD   |      |     |     |     | DQB1*03:134                        |          |          |           |
| DQB1*03:136                      | P                                        | WD                                  | WD    |     |     | WD   |      |     |     | WD  | DQB1*03:136                        |          |          |           |
| DQB1*03:138                      | P                                        | WD                                  | WD    |     |     | WD   |      |     |     |     | DQB1*03:138                        |          |          |           |
| DQB1*03:141                      | P                                        | WD                                  | WD    |     |     | WD   |      |     |     |     | DQB1*03:141                        |          |          |           |
| DQB1*03:162                      | P                                        | WD                                  | WD    |     |     | WD   |      |     |     |     | DQB1*03:162                        |          |          |           |
| DQB1*03:197Q                     | Q                                        | WD                                  | WD    |     |     |      | WD   |     |     |     | DQB1*03:197Q                       |          |          |           |
| DQB1*03:201                      | P                                        | WD                                  | WD    |     |     | WD   |      |     |     |     | DQB1*03:201                        |          |          |           |
| DQB1*03:205                      | P                                        | WD                                  | WD    |     |     | WD   |      |     |     |     | DQB1*03:205                        |          |          |           |
| DQB1*03:207                      | P                                        | WD                                  | WD    |     |     |      |      |     |     |     | DQB1*03:207                        |          |          |           |
| DQB1*04:01                       | P                                        | C                                   | C     | WD  | C   | I    | C    | C   | C   | C   | DQB1*04:01                         | C        | C        | C         |
| DQB1*04:02                       | P                                        | C                                   | C     | C   | C   | C    | C    | C   | C   | C   | DQB1*04:02                         | C        | C        | C         |
| DQB1*04:03                       | P                                        | WD                                  | WD    |     |     | WD   |      |     |     |     | DQB1*04:03                         |          |          |           |
| DQB1*04:04                       | P                                        | WD                                  | WD    |     |     | WD   |      |     |     |     | DQB1*04:04                         |          |          |           |
| DQB1*04:11                       | P                                        | WD                                  | WD    |     |     | WD   |      |     |     |     | DQB1*04:11                         |          |          |           |
| DQB1*04:12                       | P                                        | I                                   | WD    |     | I   |      |      |     |     |     | DQB1*04:12                         |          |          |           |
| DQB1*04:22                       | P                                        | WD                                  | WD    |     |     |      |      |     |     |     | DQB1*04:22                         |          |          |           |
| DQB1*05:01                       | P                                        | C                                   | C     | C   | C   | C    | C    | C   | C   | C   | DQB1*05:01                         | C        | C        | C         |
| DQB1*05:02                       | P                                        | C                                   | C     | C   | C   | C    | C    | C   | C   | C   | DQB1*05:02                         | C        | C        | C         |
| DQB1*05:03                       | P                                        | C                                   | C     | C   | C   | C    | C    | C   | C   | C   | DQB1*05:03                         | C        | C        | C         |
| DQB1*05:04                       | P                                        | C                                   | C     | C   | C   | C    | C    | C   | C   | C   | DQB1*05:04                         | C        | C        | WD        |
| DQB1*05:05                       | P                                        | WD                                  | WD    |     |     | WD   | WD   |     |     | WD  | DQB1*05:05                         |          |          | WD        |
| DQB1*05:06                       | P                                        | WD                                  | WD    |     | WD  |      |      |     |     |     | DQB1*05:06                         |          |          |           |
| DQB1*05:09                       | P                                        | WD                                  | WD    |     |     | WD   |      |     |     |     | DQB1*05:09                         |          |          |           |
| DQB1*05:11                       | P                                        | WD                                  | WD    |     |     | WD   |      |     |     |     | DQB1*05:11                         |          |          |           |
| DQB1*05:12                       | P                                        | WD                                  | WD    |     |     | WD   |      |     |     |     | DQB1*05:12                         |          |          |           |
| DQB1*05:20                       | P                                        | WD                                  | WD    |     |     | WD   |      |     |     |     | DQB1*05:20                         |          |          |           |
| DQB1*05:23                       | P                                        | C                                   | I     |     | C   |      |      |     |     |     | DQB1*05:23                         |          |          |           |

Supplementary Table 3f. Comparison of HLA-DQB1 P group two-field assignments among CIWD catalogs <sup>a</sup>

| HLA-DQB1 IPD-<br>HLA/IMGT 3.31.0 | Nomenclature<br>Designation <sup>a</sup> | 3.0.0 CIWD                          |       |     |     |      |      |     |     |     | 2.0.0 CWD                          |          | EFI CWD  | China CWD |
|----------------------------------|------------------------------------------|-------------------------------------|-------|-----|-----|------|------|-----|-----|-----|------------------------------------|----------|----------|-----------|
|                                  |                                          | Category by Population <sup>b</sup> |       |     |     |      |      |     |     |     | HLA-DQB1 IPD-<br>IMGT/HLA<br>3.9.0 | Category | Category | Category  |
|                                  |                                          | Highest<br>Frequency                | Total | AFA | API | EURO | MENA | HIS | NAM | UNK |                                    |          |          |           |
| DQB1*05:26                       | P                                        | WD                                  | WD    |     | WD  |      |      |     |     |     | DQB1*05:26                         |          |          |           |
| DQB1*05:34                       | P                                        | WD                                  | WD    |     |     |      |      |     |     |     | DQB1*05:34                         |          |          |           |
| DQB1*05:44                       | P                                        | WD                                  | WD    |     |     |      |      |     |     |     | DQB1*05:44                         |          |          |           |
| DQB1*05:49                       | P                                        | WD                                  | WD    |     |     | WD   |      |     |     |     | DQB1*05:49                         |          |          |           |
| DQB1*05:51                       | P                                        | WD                                  | WD    |     |     | WD   |      |     |     |     | DQB1*05:51                         |          |          |           |
| DQB1*05:52                       | P                                        | WD                                  | WD    |     |     | WD   |      |     |     |     | DQB1*05:52                         |          |          |           |
| DQB1*05:58                       | P                                        | WD                                  | WD    | WD  |     |      |      |     |     |     | DQB1*05:58                         |          |          |           |
| DQB1*05:60                       | P                                        | WD                                  | WD    |     |     | WD   |      |     |     |     | DQB1*05:60                         |          |          |           |
| DQB1*05:67                       | P                                        | WD                                  | WD    |     | WD  |      |      |     |     |     | DQB1*05:67                         |          |          |           |
| DQB1*05:69                       | P                                        | WD                                  | WD    |     |     | WD   |      |     |     |     | DQB1*05:69                         |          |          |           |
| DQB1*05:79                       | P                                        | WD                                  | WD    |     |     | WD   |      |     |     |     | DQB1*05:79                         |          |          |           |
| DQB1*05:80                       | P                                        | WD                                  | WD    |     |     |      |      |     |     |     | DQB1*05:80                         |          |          |           |
| DQB1*05:88                       | P                                        | WD                                  | WD    | WD  |     |      |      |     |     |     | DQB1*05:88                         |          |          |           |
| DQB1*06:01                       | P                                        | C                                   | C     | C   | C   | C    | C    | C   | C   | C   | DQB1*06:01                         | C        | C        | C         |
| DQB1*06:02                       | P                                        | C                                   | C     | C   | C   | C    | C    | C   | C   | C   | DQB1*06:02                         | C        | C        | C         |
| DQB1*06:03                       | P                                        | C                                   | C     | C   | C   | C    | C    | C   | C   | C   | DQB1*06:03                         | C        | C        | C         |
| DQB1*06:04                       | P                                        | C                                   | C     | C   | C   | C    | C    | C   | C   | C   | DQB1*06:04                         | C        | C        | C         |
| DQB1*06:05                       | P                                        | WD                                  | WD    |     |     | WD   |      |     |     |     | DQB1*06:05                         | WD       | C        | WD        |
| DQB1*06:06                       | P                                        | o                                   | o     |     |     |      |      |     |     |     | DQB1*06:06                         |          | WD       |           |
| DQB1*06:07                       | P                                        | I                                   | I     |     | WD  | I    | WD   | WD  |     | I   | DQB1*06:07                         |          | C        | WD        |
| DQB1*06:08                       | P                                        | C                                   | C     | C   | WD  | WD   | WD   | C   | C   | C   | DQB1*06:08                         | C        | WD       |           |
| DQB1*06:09                       | P                                        | C                                   | C     | C   | C   | C    | C    | C   | C   | C   | DQB1*06:09                         | C        | C        | C         |
| DQB1*06:10                       | P                                        | C                                   | I     |     | C   | WD   |      |     |     | I   | DQB1*06:10                         | WD       |          | C         |
| DQB1*06:11                       | P                                        | C                                   | I     | C   | I   | I    | WD   | C   | C   | I   | DQB1*06:11                         | WD       | WD       | WD        |
| DQB1*06:12                       | P                                        | WD                                  | WD    |     | WD  | WD   |      |     |     |     | DQB1*06:12                         |          |          |           |
| DQB1*06:13                       | P                                        | I                                   | I     | WD  |     | I    |      |     |     | WD  | DQB1*06:13                         |          | WD       |           |
| DQB1*06:14                       | P                                        | I                                   | I     | WD  | WD  | I    | WD   | I   |     | I   | DQB1*06:14                         |          | WD       |           |

Supplementary Table 3f. Comparison of HLA-DQB1 P group two-field assignments among CIWD catalogs <sup>a</sup>

| HLA-DQB1 IPD-<br>HLA/IMGT 3.31.0 | Nomenclature<br>Designation <sup>a</sup> | 3.0.0 CIWD                          |       |     |     |      |      |     |     |     | 2.0.0 CWD                          |          | EFI CWD  | China CWD |
|----------------------------------|------------------------------------------|-------------------------------------|-------|-----|-----|------|------|-----|-----|-----|------------------------------------|----------|----------|-----------|
|                                  |                                          | Category by Population <sup>b</sup> |       |     |     |      |      |     |     |     | HLA-DQB1 IPD-<br>IMGT/HLA<br>3.9.0 | Category | Category | Category  |
|                                  |                                          | Highest<br>Frequency                | Total | AFA | API | EURO | MENA | HIS | NAM | UNK |                                    |          |          |           |
| DQB1*06:15                       | P                                        | WD                                  | WD    |     |     | WD   |      |     |     |     | DQB1*06:15                         |          | WD       |           |
| DQB1*06:16                       | P                                        | I                                   | I     | WD  |     | I    |      | I   |     | I   | DQB1*06:16                         |          | WD       |           |
| DQB1*06:18                       | P                                        | WD                                  | WD    | WD  |     | WD   |      |     |     |     | DQB1*06:18                         |          |          |           |
| DQB1*06:19                       | P                                        | o                                   | o     |     |     |      |      |     |     |     | DQB1*06:19                         |          | WD       |           |
| DQB1*06:20                       | P                                        | WD                                  | WD    | WD  |     | WD   |      |     |     |     | DQB1*06:20                         |          | WD       |           |
| DQB1*06:21                       | P                                        | I                                   | I     |     |     | I    |      |     |     |     | DQB1*06:21                         |          | WD       |           |
| DQB1*06:22                       | P                                        | WD                                  | WD    | WD  |     | WD   |      |     |     | WD  | DQB1*06:22                         |          |          |           |
| DQB1*06:23                       | P                                        | WD                                  | WD    |     |     | WD   |      |     |     |     | DQB1*06:23                         |          | WD       |           |
| DQB1*06:26N                      | N                                        | I                                   | WD    | WD  |     | WD   |      |     |     | I   | DQB1*06:26N                        |          |          |           |
| DQB1*06:27                       | P                                        | WD                                  | WD    |     |     | WD   |      |     |     | WD  | DQB1*06:27                         |          | WD       |           |
| DQB1*06:28                       | P                                        | WD                                  | WD    |     |     | WD   |      |     |     |     | DQB1*06:28                         |          | WD       |           |
| DQB1*06:29                       | P                                        | WD                                  | WD    |     |     | WD   |      |     |     |     | DQB1*06:29                         |          | WD       |           |
| DQB1*06:31                       | P                                        | WD                                  | WD    |     |     | WD   | WD   |     |     |     | DQB1*06:31                         |          | WD       |           |
| DQB1*06:32                       | P                                        | WD                                  | WD    |     |     | WD   |      |     |     |     | DQB1*06:32                         |          | WD       |           |
| DQB1*06:33                       | P                                        | I                                   | I     | WD  |     | I    |      |     |     | I   | DQB1*06:33                         |          |          |           |
| DQB1*06:40                       | P                                        | WD                                  | WD    |     |     | WD   |      |     |     |     | DQB1*06:40                         |          |          |           |
| DQB1*06:46                       | P                                        | WD                                  | WD    | WD  |     | WD   |      |     |     |     | DQB1*06:46                         |          | WD       |           |
| DQB1*06:48                       | P                                        | C                                   | I     |     | C   | WD   |      |     |     | WD  | DQB1*06:48                         |          | WD       |           |
| DQB1*06:49                       | P                                        | C                                   | WD    | C   |     |      |      |     |     | WD  | DQB1*06:49                         |          |          |           |
| DQB1*06:50                       | P                                        | WD                                  | WD    | WD  |     |      |      |     |     |     | DQB1*06:50                         |          |          |           |
| DQB1*06:53                       | P                                        | WD                                  | WD    |     | WD  | WD   |      |     |     |     | DQB1*06:53                         |          | WD       |           |
| DQB1*06:55                       | P                                        | I                                   | WD    |     | I   | WD   |      |     |     |     | DQB1*06:55                         |          |          |           |
| DQB1*06:57                       | P                                        | I                                   | WD    |     | I   |      |      |     |     |     | DQB1*06:57                         |          |          |           |
| DQB1*06:58                       | P                                        | WD                                  | WD    |     |     | WD   |      |     |     |     | DQB1*06:58                         |          | WD       |           |
| DQB1*06:62                       | P                                        | WD                                  | WD    |     |     | WD   |      |     |     |     | DQB1*06:62                         |          | WD       |           |
| DQB1*06:68                       | P                                        | WD                                  | WD    |     |     | WD   |      |     |     |     | DQB1*06:68                         |          |          |           |
| DQB1*06:69                       | P                                        | WD                                  | WD    |     |     | WD   |      |     |     |     | DQB1*06:69                         |          |          |           |

Supplementary Table 3f. Comparison of HLA-DQB1 P group two-field assignments among CIWD catalogs <sup>a</sup>

| HLA-DQB1 IPD-<br>HLA/IMGT 3.31.0 | Nomenclature<br>Designation <sup>a</sup> | 3.0.0 CIWD                          |       |     |     |      |      |     |     |     | 2.0.0 CWD                          |          | EFI CWD  | China CWD |
|----------------------------------|------------------------------------------|-------------------------------------|-------|-----|-----|------|------|-----|-----|-----|------------------------------------|----------|----------|-----------|
|                                  |                                          | Category by Population <sup>b</sup> |       |     |     |      |      |     |     |     | HLA-DQB1 IPD-<br>IMGT/HLA<br>3.9.0 | Category | Category | Category  |
|                                  |                                          | Highest<br>Frequency                | Total | AFA | API | EURO | MENA | HIS | NAM | UNK |                                    |          |          |           |
| DQB1*06:73                       | P                                        | WD                                  | WD    |     |     | WD   |      |     |     |     | DQB1*06:73                         |          | WD       |           |
| DQB1*06:74                       | P                                        | I                                   | WD    |     | I   |      |      |     |     | I   | DQB1*06:74                         |          |          |           |
| DQB1*06:75N                      | N                                        | WD                                  | WD    |     |     | WD   |      |     |     |     | DQB1*06:75N                        |          | WD       |           |
| DQB1*06:77N                      | N                                        | I                                   | WD    |     | I   |      |      |     |     |     | DQB1*06:77N                        |          |          |           |
| DQB1*06:78                       | P                                        | WD                                  | WD    |     |     | WD   |      |     |     |     | DQB1*06:78                         |          |          |           |
| DQB1*06:79                       | P                                        | WD                                  | WD    |     |     | WD   |      |     |     |     | DQB1*06:79                         |          | WD       |           |
| DQB1*06:81                       | P                                        | I                                   | WD    |     |     | WD   |      |     |     | I   | DQB1*06:81                         |          | WD       |           |
| DQB1*06:82                       | P                                        | WD                                  | WD    |     |     | WD   |      |     |     |     | DQB1*06:82                         |          |          |           |
| DQB1*06:85                       | P                                        | WD                                  | WD    | WD  |     |      |      |     |     |     | DQB1*06:85                         |          |          |           |
| DQB1*06:90                       | P                                        | WD                                  | WD    |     |     | WD   |      |     |     |     | DQB1*06:90                         |          | WD       |           |
| DQB1*06:91                       | P                                        | WD                                  | WD    |     | WD  |      |      |     |     |     | DQB1*06:91                         |          |          |           |
| DQB1*06:92                       | P                                        | I                                   | WD    |     | I   |      |      |     |     |     | DQB1*06:92                         |          |          |           |
| DQB1*06:93                       | P                                        | WD                                  | WD    |     |     |      |      |     |     |     | DQB1*06:93                         |          |          |           |
| DQB1*06:107                      | P                                        | o                                   | o     |     |     |      |      |     |     |     | DQB1*06:107                        |          |          | WD        |
| DQB1*06:118                      | P                                        | WD                                  | WD    |     |     | WD   |      |     |     |     | DQB1*06:118                        |          |          |           |
| DQB1*06:122                      | P                                        | WD                                  | WD    |     |     | WD   |      |     |     |     | DQB1*06:122                        |          |          |           |
| DQB1*06:125                      | P                                        | WD                                  | WD    |     |     | WD   |      |     |     |     | DQB1*06:125                        |          | WD       |           |
| DQB1*06:126                      | P                                        | WD                                  | WD    |     |     |      | WD   |     |     |     | DQB1*06:126                        |          |          |           |
| DQB1*06:135                      | P                                        | WD                                  | WD    |     | WD  |      |      |     |     |     | DQB1*06:135                        |          |          |           |
| DQB1*06:136                      | P                                        | WD                                  | WD    |     |     | WD   |      |     |     |     | DQB1*06:136                        |          |          |           |
| DQB1*06:140                      | P                                        | I                                   | WD    |     | I   |      |      |     |     |     | DQB1*06:140                        |          |          |           |
| DQB1*06:142                      | P                                        | WD                                  | WD    |     | WD  |      |      |     |     |     | DQB1*06:142                        |          |          |           |
| DQB1*06:144N                     | N                                        | WD                                  | WD    |     | WD  |      |      |     |     |     | DQB1*06:144N                       |          |          |           |
| DQB1*06:153                      | P                                        | WD                                  | WD    |     | WD  |      | WD   |     |     |     | DQB1*06:153                        |          |          |           |
| DQB1*06:155                      | P                                        | WD                                  | WD    |     |     | WD   |      |     |     |     | DQB1*06:155                        |          |          |           |
| DQB1*06:184                      | P                                        | WD                                  | WD    |     | WD  |      |      |     |     |     | DQB1*06:184                        |          |          |           |



**Supplementary Table 3f. Comparison of HLA-DQB1 P group two-field assignments among CIWD catalogs <sup>a</sup>**

|                                  |                                          | 3.0.0 CIWD                          |       |     |     |      |      |     |     |     | 2.0.0 CWD                          |          | EFI CWD  | China CWD |
|----------------------------------|------------------------------------------|-------------------------------------|-------|-----|-----|------|------|-----|-----|-----|------------------------------------|----------|----------|-----------|
|                                  |                                          | Category by Population <sup>b</sup> |       |     |     |      |      |     |     |     |                                    |          |          |           |
| HLA-DQB1 IPD-<br>HLA/IMGT 3.31.0 | Nomenclature<br>Designation <sup>a</sup> | Highest<br>Frequency                | Total | AFA | API | EURO | MENA | HIS | NAM | UNK | HLA-DQB1 IPD-<br>IMGT/HLA<br>3.9.0 | Category | Category | Category  |

C, common; I, intermediate; WD, well-documented

<sup>a</sup> Alleles observed at least five times in any population group in the current dataset are included in this table. The exception are alleles that were observed in previous catalogs but that are not present or are observed less than five times. Note that this two-field designation is the equivalent of a "P" assignment so that alleles within a P group that encode alleles that differ outside of the antigen recognition domain are not listed separately (e.g., DQB1\*02:02 is within the DQB1\*02:01P assignment and is not listed in this table even though it was categorized as common in 2.0.0 CWD). The table does not list all alleles from IPD-IMGT/HLA version 3.31.0.

<sup>b</sup> Population groups include: AFA (African/African American), API (Asian/Pacific Islander), EURO (European/European descent), MENA (Middle East/North Coast of Africa), HIS (Hispanic), NAM (Native American) and UNK (unknown, multiple ancestries or other). Total is the overall population i.e., all groups combined. Highest frequency is the highest CIWD designation among all the individual groups.

<sup>c</sup> Not-CIWD, o.

Supplementary Table 3g. Comparison of HLA-DPB1 P group two-field assignments among CIWD catalogs <sup>a</sup>

|                                  |                                          | 3.0.0 CIWD                          |       |     |     |      |      |     |     |     | 2.0.0 CWD                       |          | EFI CWD  | China CWD     |
|----------------------------------|------------------------------------------|-------------------------------------|-------|-----|-----|------|------|-----|-----|-----|---------------------------------|----------|----------|---------------|
|                                  |                                          | Category by Population <sup>b</sup> |       |     |     |      |      |     |     |     |                                 |          |          |               |
| HLA-DPB1 IPD-<br>HLA/IMGT 3.31.0 | Nomenclature<br>Designation <sup>a</sup> | Highest<br>Frequency                | Total | AFA | API | EURO | MENA | HIS | NAM | UNK | HLA-DPB1 IPD-<br>IMGT/HLA 3.9.0 | Category | Category | Category      |
| DPB1*01:01                       | P                                        | C                                   | C     | C   | C   | C    | C    | C   | C   | C   | DPB1*01:01                      | C        | C        | Not available |
| DPB1*02:01                       | P                                        | C                                   | C     | C   | C   | C    | C    | C   | C   | C   | DPB1*02:01                      | C        | C        |               |
| DPB1*02:02                       | P                                        | C                                   | C     | C   | C   | C    | C    | C   | C   | C   | DPB1*02:02                      | C        | C        |               |
| DPB1*03:01                       | P                                        | C                                   | C     | C   | C   | C    | C    | C   | C   | C   | DPB1*03:01                      | C        | C        |               |
| DPB1*04:01                       | P                                        | C                                   | C     | C   | C   | C    | C    | C   | C   | C   | DPB1*04:01                      | C        | C        |               |
| DPB1*04:02                       | P                                        | C                                   | C     | C   | C   | C    | C    | C   | C   | C   | DPB1*04:02                      | C        | C        |               |
| DPB1*05:01                       | P                                        | C                                   | C     | C   | C   | C    | C    | C   | C   | C   | DPB1*05:01                      | C        | C        |               |
| DPB1*06:01                       | P                                        | C                                   | C     | C   | C   | C    | C    | C   | C   | C   | DPB1*06:01                      | C        | C        |               |
| DPB1*08:01                       | P                                        | WD                                  | WD    |     |     | WD   |      |     |     |     | DPB1*08:01                      |          | WD       |               |
| DPB1*09:01                       | P                                        | C                                   | C     | C   | C   | C    | C    | C   | C   | C   | DPB1*09:01                      | C        | C        |               |
| DPB1*10:01                       | P                                        | C                                   | C     | C   | C   | C    | C    | C   | C   | C   | DPB1*10:01                      | C        | C        |               |
| DPB1*11:01                       | P                                        | C                                   | C     | C   | C   | C    | C    | C   | C   | C   | DPB1*11:01                      | C        | C        |               |
| DPB1*13:01                       | P                                        | C                                   | C     | C   | C   | C    | C    | C   | C   | C   | DPB1*13:01                      | C        | C        |               |
| DPB1*14:01                       | P                                        | C                                   | C     | C   | C   | C    | C    | C   | C   | C   | DPB1*14:01                      | C        | C        |               |
| DPB1*15:01                       | P                                        | C                                   | C     | C   | C   | C    | C    | C   | C   | C   | DPB1*15:01                      | C        | C        |               |
| DPB1*16:01                       | P                                        | C                                   | C     | C   | C   | C    | C    | C   | C   | C   | DPB1*16:01                      | C        | WD       |               |
| DPB1*17:01                       | P                                        | C                                   | C     | C   | C   | C    | C    | C   | C   | C   | DPB1*17:01                      | C        | C        |               |
| DPB1*18:01                       | P                                        | C                                   | C     | C   | I   | I    | C    | C   | C   | C   | DPB1*18:01                      | C        | C        |               |
| DPB1*19:01                       | P                                        | C                                   | C     | C   | C   | C    | C    | C   | C   | C   | DPB1*19:01                      | C        | C        |               |
| DPB1*20:01                       | P                                        | C                                   | C     | C   | C   | C    | C    | C   | C   | C   | DPB1*20:01                      | C        | WD       |               |
| DPB1*21:01                       | P                                        | C                                   | C     | WD  | C   | I    | WD   | I   | C   | C   | DPB1*21:01                      | C        | WD       |               |
| DPB1*22:01                       | P                                        | I                                   | WD    |     | I   | WD   |      |     |     |     | DPB1*22:01                      | WD       | WD       |               |
| DPB1*23:01                       | P                                        | C                                   | C     | C   | C   | C    | C    | C   | C   | C   | DPB1*23:01                      | C        | C        |               |
| DPB1*24:01                       | P                                        | I                                   | I     |     |     | I    | WD   | I   |     | I   | DPB1*24:01                      |          | WD       |               |
| DPB1*25:01                       | P                                        | I                                   | I     |     | I   | I    |      | I   |     | I   | DPB1*25:01                      |          | WD       |               |
| DPB1*26:01                       | P                                        | C                                   | C     | C   | C   | C    | C    | C   | C   | C   | DPB1*26:01                      | C        | C        |               |
| DPB1*27:01                       | P                                        | C                                   | I     | C   |     | WD   |      | C   | C   | C   | DPB1*27:01                      | C        | WD       |               |
| DPB1*28:01                       | P                                        | C                                   | C     | C   | C   | I    | C    | I   | C   | C   | DPB1*28:01                      | C        | WD       |               |

Supplementary Table 3g. Comparison of HLA-DPB1 P group two-field assignments among CIWD catalogs <sup>a</sup>

|                                  |                                          | 3.0.0 CIWD                          |       |     |     |      |      |     |     |     | 2.0.0 CWD                       |          | EFI CWD  | China CWD |
|----------------------------------|------------------------------------------|-------------------------------------|-------|-----|-----|------|------|-----|-----|-----|---------------------------------|----------|----------|-----------|
|                                  |                                          | Category by Population <sup>b</sup> |       |     |     |      |      |     |     |     |                                 |          |          |           |
| HLA-DPB1 IPD-<br>HLA/IMGT 3.31.0 | Nomenclature<br>Designation <sup>a</sup> | Highest<br>Frequency                | Total | AFA | API | EURO | MENA | HIS | NAM | UNK | HLA-DPB1 IPD-<br>IMGT/HLA 3.9.0 | Category | Category | Category  |
| DPB1*29:01                       | P                                        | C                                   | C     | C   | C   | I    | WD   | C   | C   | C   | DPB1*29:01                      | C        | WD       |           |
| DPB1*30:01                       | P                                        | C                                   | C     | C   | I   | C    | C    | C   | C   | C   | DPB1*30:01                      | C        | C        |           |
| DPB1*31:01                       | P                                        | C                                   | I     |     | C   | WD   |      | I   |     | C   | DPB1*31:01                      | C        | WD       |           |
| DPB1*32:01                       | P                                        | o <sup>c</sup>                      | o     |     |     |      |      |     |     |     | DPB1*32:01                      |          | WD       |           |
| DPB1*33:01                       | P                                        | I                                   | I     |     | I   | I    | WD   | I   |     | I   | DPB1*33:01                      | WD       | WD       |           |
| DPB1*34:01                       | P                                        | C                                   | C     | C   | C   | C    | C    | C   | C   | C   | DPB1*34:01                      | C        | C        |           |
| DPB1*35:01                       | P                                        | C                                   | C     | C   | WD  | C    | C    | C   | C   | C   | DPB1*35:01                      | C        | WD       |           |
| DPB1*36:01                       | P                                        | C                                   | I     |     | C   | I    | C    |     |     | I   | DPB1*36:01                      | WD       |          |           |
| DPB1*37:01                       | P                                        | C                                   | WD    |     |     | WD   | C    |     |     |     | DPB1*37:01                      |          |          |           |
| DPB1*38:01                       | P                                        | C                                   | I     |     | C   | WD   |      |     |     | I   | DPB1*38:01                      | WD       |          |           |
| DPB1*39:01                       | P                                        | C                                   | C     | C   | I   | I    | WD   | C   | C   | C   | DPB1*39:01                      | C        |          |           |
| DPB1*40:01                       | P                                        | C                                   | C     | C   | WD  | I    | WD   | C   | C   | C   | DPB1*40:01                      | WD       | WD       |           |
| DPB1*41:01                       | P                                        | C                                   | I     |     | C   | I    | C    | I   |     | C   | DPB1*41:01                      |          | C        |           |
| DPB1*45:01                       | P                                        | C                                   | C     | WD  | C   | C    | C    | C   | C   | C   | DPB1*45:01                      | C        | C        |           |
| DPB1*46:01                       | P                                        | C                                   | C     | C   | C   | I    | C    | I   |     | I   | DPB1*46:01                      | C        | C        |           |
| DPB1*47:01                       | P                                        | C                                   | I     | WD  | C   | I    | C    |     |     | I   | DPB1*47:01                      | WD       | C        |           |
| DPB1*48:01                       | P                                        | C                                   | I     |     | C   | WD   | WD   | I   |     | I   | DPB1*48:01                      |          | WD       |           |
| DPB1*49:01                       | P                                        | C                                   | I     | C   | WD  | WD   | WD   | C   | C   | I   | DPB1*49:01                      | WD       |          |           |
| DPB1*50:01                       | P                                        | C                                   | I     |     | WD  | C    | WD   | I   |     | C   | DPB1*50:01                      |          | WD       |           |
| DPB1*51:01                       | P                                        | C                                   | C     | WD  | C   | C    | C    | I   | C   | C   | DPB1*51:01                      | C        |          |           |
| DPB1*52:01                       | P                                        | I                                   | I     | WD  | I   | I    |      |     |     | I   | DPB1*52:01                      |          |          |           |
| DPB1*53:01                       | P                                        | C                                   | WD    | C   |     |      |      | I   | C   | I   | DPB1*53:01                      |          |          |           |
| DPB1*54:01                       | P                                        | WD                                  | WD    | WD  |     | WD   |      |     |     | WD  | DPB1*54:01                      |          |          |           |
| DPB1*55:01                       | P                                        | C                                   | I     | C   | I   | WD   | WD   | C   |     | I   | DPB1*55:01                      | C        |          |           |
| DPB1*56:01                       | P                                        | WD                                  | WD    |     |     | WD   |      |     |     |     | DPB1*56:01                      |          |          |           |
| DPB1*57:01                       | P                                        | I                                   | I     | WD  | I   | I    | WD   | I   |     | I   | DPB1*57:01                      | WD       |          |           |
| DPB1*59:01                       | P                                        | C                                   | I     |     | WD  | C    |      | I   |     | I   | DPB1*59:01                      | C        |          |           |
| DPB1*60:01                       | P                                        | WD                                  | WD    | WD  |     |      |      |     |     |     | DPB1*60:01                      |          |          |           |

Supplementary Table 3g. Comparison of HLA-DPB1 P group two-field assignments among CIWD catalogs <sup>a</sup>

|                                  |                                          | 3.0.0 CIWD                          |       |     |     |      |      |     |     |     | 2.0.0 CWD                       |          | EFI CWD  | China CWD |
|----------------------------------|------------------------------------------|-------------------------------------|-------|-----|-----|------|------|-----|-----|-----|---------------------------------|----------|----------|-----------|
|                                  |                                          | Category by Population <sup>b</sup> |       |     |     |      |      |     |     |     |                                 |          |          |           |
| HLA-DPB1 IPD-<br>HLA/IMGT 3.31.0 | Nomenclature<br>Designation <sup>a</sup> | Highest<br>Frequency                | Total | AFA | API | EURO | MENA | HIS | NAM | UNK | HLA-DPB1 IPD-<br>IMGT/HLA 3.9.0 | Category | Category | Category  |
| DPB1*61:01N                      | N                                        | C                                   | WD    | C   |     |      |      | I   |     | I   | DPB1*61:01N                     |          |          |           |
| DPB1*63:01                       | P                                        | C                                   | I     | C   | WD  | I    | C    | C   | C   | C   | DPB1*63:01                      | C        | C        |           |
| DPB1*64:01N                      | N                                        | I                                   | WD    |     |     | WD   |      |     |     | I   | DPB1*64:01N                     |          |          |           |
| DPB1*65:01                       | P                                        | WD                                  | WD    |     | WD  | WD   |      | WD  |     |     | DPB1*65:01                      |          | WD       |           |
| DPB1*66:01                       | P                                        | WD                                  | WD    |     |     | WD   |      |     |     | WD  | DPB1*66:01                      |          | WD       |           |
| DPB1*67:01                       | P                                        | C                                   | WD    |     |     | WD   | C    |     |     |     | DPB1*67:01                      |          | WD       |           |
| DPB1*68:01                       | P                                        | WD                                  | WD    |     |     | WD   |      |     |     |     | DPB1*68:01                      |          | WD       |           |
| DPB1*69:01                       | P                                        | WD                                  | WD    | WD  |     | WD   |      | WD  |     |     | DPB1*69:01                      | WD       |          |           |
| DPB1*70:01                       | P                                        | I                                   | WD    |     | I   | WD   |      |     |     |     | DPB1*70:01                      |          | WD       |           |
| DPB1*71:01                       | P                                        | C                                   | I     | C   | C   | I    | C    | I   |     | I   | DPB1*71:01                      |          | WD       |           |
| DPB1*72:01                       | P                                        | I                                   | WD    |     | I   | WD   | WD   |     |     | I   | DPB1*72:01                      | WD       | WD       |           |
| DPB1*74:01                       | P                                        | WD                                  | WD    | WD  |     |      |      |     |     | WD  | DPB1*74:01                      |          |          |           |
| DPB1*75:01                       | P                                        | WD                                  | WD    |     |     | WD   | WD   |     |     |     | DPB1*75:01                      |          | WD       |           |
| DPB1*76:01                       | P                                        | WD                                  | WD    |     |     | WD   |      |     |     |     | DPB1*76:01                      |          | WD       |           |
| DPB1*77:01                       | P                                        | WD                                  | WD    |     |     | WD   |      |     |     | WD  | DPB1*77:01                      |          | WD       |           |
| DPB1*78:01                       | P                                        | I                                   | I     |     | I   | I    | WD   | I   |     | I   | DPB1*78:01                      | WD       | WD       |           |
| DPB1*79:01                       | P                                        | I                                   | WD    |     |     | WD   |      | I   |     | WD  | DPB1*79:01                      |          | WD       |           |
| DPB1*80:01                       | P                                        | C                                   | I     | C   | I   | I    | WD   | C   | C   | I   | DPB1*80:01                      |          | WD       |           |
| DPB1*81:01                       | P                                        | C                                   | I     | WD  | I   | I    | C    | I   |     | I   | DPB1*81:01                      | C        | WD       |           |
| DPB1*82:01                       | P                                        | I                                   | WD    |     |     |      |      | I   |     |     | DPB1*82:01                      |          | WD       |           |
| DPB1*83:01                       | P                                        | I                                   | WD    |     | I   | WD   |      |     |     |     | DPB1*83:01                      |          | WD       |           |
| DPB1*85:01                       | P                                        | C                                   | C     | C   | I   | I    | WD   | C   | C   | C   | DPB1*85:01                      | C        |          |           |
| DPB1*86:01                       | P                                        | WD                                  | WD    | WD  |     |      |      |     |     |     | DPB1*86:01                      |          |          |           |
| DPB1*87:01                       | P                                        | WD                                  | WD    |     |     | WD   |      |     |     | WD  | DPB1*87:01                      |          |          |           |
| DPB1*88:01                       | P                                        | C                                   | I     |     | WD  | I    | C    | WD  |     | I   | DPB1*88:01                      |          |          |           |
| DPB1*89:01                       | P                                        | WD                                  | WD    |     |     | WD   |      |     |     |     | DPB1*89:01                      |          |          |           |
| DPB1*90:01                       | P                                        | WD                                  | WD    |     |     | WD   |      |     |     | WD  | DPB1*90:01                      |          |          |           |
| DPB1*91:01                       | P                                        | C                                   | I     |     | C   | WD   | C    |     |     | I   | DPB1*91:01                      |          |          |           |

Supplementary Table 3g. Comparison of HLA-DPB1 P group two-field assignments among CIWD catalogs <sup>a</sup>

|                                  |                                          | 3.0.0 CIWD                          |       |     |     |      |      |     |     |     | 2.0.0 CWD                       |          | EFI CWD  | China CWD |
|----------------------------------|------------------------------------------|-------------------------------------|-------|-----|-----|------|------|-----|-----|-----|---------------------------------|----------|----------|-----------|
|                                  |                                          | Category by Population <sup>b</sup> |       |     |     |      |      |     |     |     |                                 |          |          |           |
| HLA-DPB1 IPD-<br>HLA/IMGT 3.31.0 | Nomenclature<br>Designation <sup>a</sup> | Highest<br>Frequency                | Total | AFA | API | EURO | MENA | HIS | NAM | UNK | HLA-DPB1 IPD-<br>IMGT/HLA 3.9.0 | Category | Category | Category  |
| DPB1*92:01                       | P                                        | I                                   | WD    |     | I   | I    |      |     |     |     | DPB1*92:01                      |          |          |           |
| DPB1*93:01                       | P                                        | C                                   | I     |     | C   | WD   |      | I   |     | I   | DPB1*93:01                      |          |          |           |
| DPB1*95:01                       | P                                        | WD                                  | WD    | WD  |     |      |      |     |     |     | DPB1*95:01                      |          |          |           |
| DPB1*96:01                       | P                                        | WD                                  | WD    |     |     |      |      |     |     |     | DPB1*96:01                      |          |          |           |
| DPB1*98:01                       | P                                        | WD                                  | WD    | WD  |     | WD   |      |     |     |     | DPB1*98:01                      |          |          |           |
| DPB1*99:01                       | P                                        | I                                   | WD    |     |     | WD   | WD   | I   |     | WD  | DPB1*99:01                      |          |          |           |
| DPB1*100:01                      | P                                        | I                                   | I     |     | I   | WD   |      | I   |     | I   | DPB1*100:01                     |          |          |           |
| DPB1*102:01                      | P                                        | WD                                  | WD    |     |     | WD   |      |     |     |     | DPB1*102:01                     |          |          |           |
| DPB1*103:01                      | P                                        | WD                                  | WD    | WD  |     | WD   |      |     |     |     | DPB1*103:01                     |          |          |           |
| DPB1*108:01                      | P                                        | I                                   | WD    |     | WD  | WD   |      | I   |     |     | DPB1*108:01                     |          | WD       |           |
| DPB1*109:01                      | P                                        | I                                   | I     |     |     | I    |      |     |     | WD  | DPB1*109:01                     |          | WD       |           |
| DPB1*110:01                      | P                                        | WD                                  | WD    |     |     | WD   |      |     |     |     | DPB1*110:01                     |          | WD       |           |
| DPB1*112:01                      | P                                        | WD                                  | WD    |     |     | WD   |      |     |     |     | DPB1*112:01                     |          |          |           |
| DPB1*113:01                      | P                                        | I                                   | WD    |     | I   | WD   | WD   |     |     |     | DPB1*113:01                     |          | WD       |           |
| DPB1*115:01                      | P                                        | I                                   | I     |     |     | I    |      |     |     | WD  | DPB1*115:01                     |          | WD       |           |
| DPB1*116:01                      | P                                        | WD                                  | WD    |     |     | WD   |      |     |     | WD  | DPB1*116:01                     |          | WD       |           |
| DPB1*120:01N                     | N                                        | WD                                  | WD    |     |     | WD   |      |     |     |     | DPB1*120:01N                    |          |          |           |
| DPB1*121:01                      | P                                        | WD                                  | WD    |     |     | WD   |      |     |     |     | DPB1*121:01                     |          | WD       |           |
| DPB1*122:01                      | P                                        | WD                                  | WD    | WD  |     | WD   |      |     |     |     | DPB1*122:01                     |          | WD       |           |
| DPB1*123:01                      | P                                        | WD                                  | WD    |     |     | WD   |      |     |     |     | DPB1*123:01                     |          | WD       |           |
| DPB1*125:01                      | P                                        | I                                   | WD    |     | I   | WD   |      |     |     |     | DPB1*125:01                     |          |          |           |
| DPB1*127:01                      | P                                        | I                                   | I     |     |     | I    |      |     |     |     | DPB1*127:01                     |          | WD       |           |
| DPB1*128:01                      | P                                        | I                                   | I     |     |     | I    |      | I   |     | I   | DPB1*128:01                     |          | WD       |           |
| DPB1*129:01                      | P                                        | WD                                  | WD    |     |     | WD   |      |     |     |     | DPB1*129:01                     |          | WD       |           |
| DPB1*130:01                      | P                                        | I                                   | I     |     |     | I    |      |     |     | I   | DPB1*130:01                     |          | C        |           |
| DPB1*132:01                      | P                                        | I                                   | WD    |     | I   | WD   | WD   | I   |     | WD  | DPB1*132:01                     |          |          |           |
| DPB1*134:01                      | P                                        | WD                                  | WD    |     |     | WD   |      |     |     |     | DPB1*134:01                     |          |          |           |
| DPB1*136:01                      | P                                        | C                                   | WD    |     |     | WD   | C    |     |     |     | DPB1*136:01                     |          |          |           |

Supplementary Table 3g. Comparison of HLA-DPB1 P group two-field assignments among CIWD catalogs <sup>a</sup>

|                                  |                                          | 3.0.0 CIWD                          |       |     |     |      |      |     |     |     | 2.0.0 CWD                       |          | EFI CWD  | China CWD |
|----------------------------------|------------------------------------------|-------------------------------------|-------|-----|-----|------|------|-----|-----|-----|---------------------------------|----------|----------|-----------|
|                                  |                                          | Category by Population <sup>b</sup> |       |     |     |      |      |     |     |     |                                 |          |          |           |
| HLA-DPB1 IPD-<br>HLA/IMGT 3.31.0 | Nomenclature<br>Designation <sup>a</sup> | Highest<br>Frequency                | Total | AFA | API | EURO | MENA | HIS | NAM | UNK | HLA-DPB1 IPD-<br>IMGT/HLA 3.9.0 | Category | Category | Category  |
| DPB1*137:01                      | P                                        | WD                                  | WD    |     |     | WD   |      |     |     | WD  | DPB1*137:01                     |          |          |           |
| DPB1*139:01                      | P                                        | I                                   | WD    |     | I   |      |      |     |     |     | DPB1*139:01                     |          |          |           |
| DPB1*142:01                      | P                                        | WD                                  | WD    |     | WD  |      |      |     |     |     | DPB1*142:01                     |          |          |           |
| DPB1*143:01                      | P                                        | WD                                  | WD    | WD  |     |      |      |     |     |     | DPB1*143:01                     |          |          |           |
| DPB1*144:01                      | P                                        | WD                                  | WD    |     |     | WD   |      |     |     |     | DPB1*144:01                     |          |          |           |
| DPB1*145:01                      | P                                        | I                                   | WD    |     | WD  | WD   |      |     |     | I   | DPB1*145:01                     |          |          |           |
| DPB1*146:01                      | P                                        | WD                                  | WD    |     |     | WD   |      |     |     |     | DPB1*146:01                     |          |          |           |
| DPB1*147:01                      | P                                        | WD                                  | WD    |     |     |      |      | WD  |     |     | DPB1*147:01                     |          |          |           |
| DPB1*149:01                      | P                                        | I                                   | WD    |     |     | WD   |      |     |     | I   | DPB1*149:01                     |          |          |           |
| DPB1*150:01                      | P                                        | C                                   | I     |     | C   | WD   |      |     |     |     | DPB1*150:01                     |          |          |           |
| DPB1*151:01                      | P                                        | WD                                  | WD    |     |     | WD   |      |     |     |     | DPB1*151:01                     |          |          |           |
| DPB1*152:01                      | P                                        | WD                                  | WD    |     |     | WD   |      |     |     |     | DPB1*152:01                     |          |          |           |
| DPB1*153:01                      | P                                        | I                                   | WD    |     |     |      |      | I   |     | WD  | DPB1*153:01                     |          |          |           |
| DPB1*154:01N                     | N                                        | WD                                  | WD    |     |     | WD   |      |     |     |     | DPB1*154:01N                    |          |          |           |
| DPB1*155:01                      | P                                        | WD                                  | WD    | WD  |     | WD   |      |     |     |     | DPB1*155:01                     |          |          |           |
| DPB1*156:01                      | P                                        | I                                   | WD    |     |     | WD   |      | I   |     |     | DPB1*156:01                     |          |          |           |
| DPB1*157:01                      | P                                        | WD                                  | WD    |     |     | WD   |      |     |     |     | DPB1*157:01                     |          |          |           |
| DPB1*158:01                      | P                                        | WD                                  | WD    |     |     | WD   |      |     |     |     | DPB1*158:01                     |          |          |           |
| DPB1*161:01N                     | N                                        | WD                                  | WD    |     |     | WD   |      |     |     |     | DPB1*161:01N                    |          |          |           |
| DPB1*163:01                      | P                                        | WD                                  | WD    |     |     | WD   |      |     |     |     | DPB1*163:01                     |          |          |           |
| DPB1*164:01                      | P                                        | WD                                  | WD    |     |     | WD   |      |     |     |     | DPB1*164:01                     |          |          |           |
| DPB1*165:01                      | P                                        | WD                                  | WD    |     |     | WD   |      |     |     |     | DPB1*165:01                     |          |          |           |
| DPB1*166:01                      | P                                        | I                                   | WD    |     | I   |      |      |     |     |     | DPB1*166:01                     |          |          |           |
| DPB1*170:01                      | P                                        | WD                                  | WD    |     |     | WD   |      |     |     |     | DPB1*170:01                     |          |          |           |
| DPB1*172:01                      | P                                        | WD                                  | WD    |     |     | WD   |      | WD  |     |     | DPB1*172:01                     |          |          |           |
| DPB1*173:01                      | P                                        | I                                   | WD    |     | I   | WD   | WD   |     |     |     | DPB1*173:01                     |          |          |           |
| DPB1*177:01                      | P                                        | WD                                  | WD    |     |     | WD   |      |     |     |     | DPB1*177:01                     |          |          |           |
| DPB1*178:01                      | P                                        | WD                                  | WD    |     |     | WD   |      |     |     |     | DPB1*178:01                     |          |          |           |

Supplementary Table 3g. Comparison of HLA-DPB1 P group two-field assignments among CIWD catalogs <sup>a</sup>

| HLA-DPB1 IPD-<br>HLA/IMGT 3.31.0 | Nomenclature<br>Designation <sup>a</sup> | 3.0.0 CIWD           |       |     |     |      |      |     |     |     | 2.0.0 CWD                       |          | EFI CWD  | China CWD |
|----------------------------------|------------------------------------------|----------------------|-------|-----|-----|------|------|-----|-----|-----|---------------------------------|----------|----------|-----------|
|                                  |                                          | Highest<br>Frequency | Total | AFA | API | EURO | MENA | HIS | NAM | UNK | HLA-DPB1 IPD-<br>IMGT/HLA 3.9.0 | Category | Category | Category  |
|                                  |                                          |                      |       |     |     |      |      |     |     |     |                                 |          |          |           |
| DPB1*179:01                      | P                                        | WD                   | WD    |     |     | WD   |      |     |     |     | DPB1*179:01                     |          |          |           |
| DPB1*181:01                      | P                                        | WD                   | WD    |     |     |      | WD   |     |     |     | DPB1*181:01                     |          |          |           |
| DPB1*182:01                      | P                                        | WD                   | WD    |     | WD  | WD   |      |     |     |     | DPB1*182:01                     |          |          |           |
| DPB1*184:01                      | P                                        | I                    | WD    |     |     | WD   |      |     |     | I   | DPB1*184:01                     |          |          |           |
| DPB1*185:01                      | P                                        | I                    | WD    |     |     | WD   |      |     |     | I   | DPB1*185:01                     |          |          |           |
| DPB1*186:01                      | P                                        | WD                   | WD    |     | WD  |      |      |     |     |     | DPB1*186:01                     |          |          |           |
| DPB1*187:01                      | P                                        | WD                   | WD    |     |     | WD   |      |     |     |     | DPB1*187:01                     |          |          |           |
| DPB1*188:01                      | P                                        | WD                   | WD    |     |     | WD   |      |     |     |     | DPB1*188:01                     |          |          |           |
| DPB1*189:01                      | P                                        | WD                   | WD    |     |     | WD   | WD   |     |     |     | DPB1*189:01                     |          |          |           |
| DPB1*190:01                      | P                                        | I                    | I     |     |     | I    |      |     |     |     | DPB1*190:01                     |          |          |           |
| DPB1*191:01                      | P                                        | I                    | I     |     |     | I    |      |     |     |     | DPB1*191:01                     |          |          |           |
| DPB1*192:01                      | P                                        | I                    | WD    |     | I   |      |      |     |     |     | DPB1*192:01                     |          |          |           |
| DPB1*199:01                      | P                                        | WD                   | WD    |     |     | WD   |      |     |     |     | DPB1*199:01                     |          |          |           |
| DPB1*200:01                      | P                                        | WD                   | WD    |     |     | WD   |      |     |     |     | DPB1*200:01                     |          |          |           |
| DPB1*201:01                      | P                                        | WD                   | WD    |     |     | WD   | WD   |     |     |     | DPB1*201:01                     |          |          |           |
| DPB1*203:01                      | P                                        | I                    | WD    |     |     |      |      | I   |     |     | DPB1*203:01                     |          |          |           |
| DPB1*206:01                      | P                                        | WD                   | WD    |     |     | WD   | WD   |     |     |     | DPB1*206:01                     |          |          |           |
| DPB1*207:01                      | P                                        | WD                   | WD    |     |     |      |      |     |     |     | DPB1*207:01                     |          |          |           |
| DPB1*208:01                      | P                                        | WD                   | WD    |     |     | WD   |      |     |     |     | DPB1*208:01                     |          |          |           |
| DPB1*209:01                      | P                                        | WD                   | WD    |     |     | WD   |      |     |     |     | DPB1*209:01                     |          |          |           |
| DPB1*210:01                      | P                                        | I                    | WD    |     |     |      |      | I   |     |     | DPB1*210:01                     |          |          |           |
| DPB1*211:01                      | P                                        | WD                   | WD    |     |     | WD   |      |     |     |     | DPB1*211:01                     |          |          |           |
| DPB1*212:01                      | P                                        | WD                   | WD    |     |     |      |      |     |     |     | DPB1*212:01                     |          |          |           |
| DPB1*214:01                      | P                                        | WD                   | WD    |     |     | WD   |      |     |     |     | DPB1*214:01                     |          |          |           |
| DPB1*215:01                      | P                                        | I                    | WD    |     | I   | WD   |      |     |     | WD  | DPB1*215:01                     |          |          |           |
| DPB1*218:01N                     | N                                        | WD                   | WD    |     |     | WD   |      |     |     |     | DPB1*218:01N                    |          |          |           |
| DPB1*220:01                      | P                                        | WD                   | WD    |     |     | WD   |      |     |     |     | DPB1*220:01                     |          |          |           |
| DPB1*221:01                      | P                                        | WD                   | WD    |     |     | WD   |      |     |     |     | DPB1*221:01                     |          |          |           |

Supplementary Table 3g. Comparison of HLA-DPB1 P group two-field assignments among CIWD catalogs <sup>a</sup>

|                                  |                                          | 3.0.0 CIWD                          |       |     |     |      |      |     |     |     | 2.0.0 CWD                       |          | EFI CWD  | China CWD |
|----------------------------------|------------------------------------------|-------------------------------------|-------|-----|-----|------|------|-----|-----|-----|---------------------------------|----------|----------|-----------|
|                                  |                                          | Category by Population <sup>b</sup> |       |     |     |      |      |     |     |     |                                 |          |          |           |
| HLA-DPB1 IPD-<br>HLA/IMGT 3.31.0 | Nomenclature<br>Designation <sup>a</sup> | Highest<br>Frequency                | Total | AFA | API | EURO | MENA | HIS | NAM | UNK | HLA-DPB1 IPD-<br>IMGT/HLA 3.9.0 | Category | Category | Category  |
| DPB1*222:01                      | P                                        | I                                   | WD    |     |     | WD   |      |     |     | I   | DPB1*222:01                     |          |          |           |
| DPB1*224:01                      | P                                        | WD                                  | WD    |     |     | WD   |      |     |     |     | DPB1*224:01                     |          |          |           |
| DPB1*225:01                      | P                                        | WD                                  | WD    |     |     | WD   |      |     |     |     | DPB1*225:01                     |          |          |           |
| DPB1*227:01                      | P                                        | WD                                  | WD    |     |     | WD   |      |     |     |     | DPB1*227:01                     |          |          |           |
| DPB1*228:01                      | P                                        | WD                                  | WD    |     |     | WD   |      |     |     |     | DPB1*228:01                     |          |          |           |
| DPB1*233:01                      | P                                        | WD                                  | WD    |     |     | WD   |      | WD  |     |     | DPB1*233:01                     |          |          |           |
| DPB1*235:01                      | P                                        | WD                                  | WD    |     |     | WD   |      |     |     |     | DPB1*235:01                     |          |          |           |
| DPB1*236:01                      | P                                        | WD                                  | WD    |     | WD  | WD   |      |     |     |     | DPB1*236:01                     |          |          |           |
| DPB1*238:01                      | P                                        | I                                   | WD    |     |     | WD   |      |     |     | I   | DPB1*238:01                     |          |          |           |
| DPB1*240:01                      | P                                        | I                                   | WD    |     |     |      |      | I   |     |     | DPB1*240:01                     |          |          |           |
| DPB1*242:01                      | P                                        | I                                   | WD    |     | I   |      |      |     |     |     | DPB1*242:01                     |          |          |           |
| DPB1*244:01                      | P                                        | WD                                  | WD    |     |     | WD   | WD   |     |     |     | DPB1*244:01                     |          |          |           |
| DPB1*245:01                      | P                                        | WD                                  | WD    |     |     | WD   |      |     |     |     | DPB1*245:01                     |          |          |           |
| DPB1*246:01                      | P                                        | WD                                  | WD    |     |     | WD   |      |     |     |     | DPB1*246:01                     |          |          |           |
| DPB1*249:01                      | P                                        | WD                                  | WD    | WD  |     |      |      |     |     |     | DPB1*249:01                     |          |          |           |
| DPB1*256:01                      | P                                        | WD                                  | WD    |     |     |      |      |     |     | WD  | DPB1*256:01                     |          |          |           |
| DPB1*257:01                      | P                                        | WD                                  | WD    |     |     | WD   |      |     |     |     | DPB1*257:01                     |          |          |           |
| DPB1*258:01                      | P                                        | WD                                  | WD    |     |     |      |      |     |     |     | DPB1*258:01                     |          |          |           |
| DPB1*259:01                      | P                                        | WD                                  | WD    |     |     | WD   |      |     |     |     | DPB1*259:01                     |          |          |           |
| DPB1*260:01                      | P                                        | WD                                  | WD    |     |     | WD   |      |     |     |     | DPB1*260:01                     |          |          |           |
| DPB1*264:01                      | P                                        | WD                                  | WD    |     |     | WD   |      |     |     |     | DPB1*264:01                     |          |          |           |
| DPB1*265:01                      | P                                        | WD                                  | WD    |     |     | WD   |      |     |     |     | DPB1*265:01                     |          |          |           |
| DPB1*266:01                      | P                                        | WD                                  | WD    |     |     | WD   |      |     |     |     | DPB1*266:01                     |          |          |           |
| DPB1*269:01                      | P                                        | I                                   | WD    |     | I   |      |      |     |     |     | DPB1*269:01                     |          |          |           |
| DPB1*270:01                      | P                                        | WD                                  | WD    |     |     | WD   |      |     |     |     | DPB1*270:01                     |          |          |           |
| DPB1*271:01                      | P                                        | I                                   | WD    |     |     | WD   |      | I   |     |     | DPB1*271:01                     |          |          |           |
| DPB1*274:01                      | P                                        | WD                                  | WD    |     |     | WD   |      |     |     |     | DPB1*274:01                     |          |          |           |
| DPB1*277:01                      | P                                        | WD                                  | WD    |     |     | WD   |      |     |     |     | DPB1*277:01                     |          |          |           |



Supplementary Table 3g. Comparison of HLA-DPB1 P group two-field assignments among CIWD catalogs <sup>a</sup>

| HLA-DPB1 IPD-<br>HLA/IMGT 3.31.0 | Nomenclature<br>Designation <sup>a</sup> | 3.0.0 CIWD           |       |     |     |      |      |     |     |     | 2.0.0 CWD                       |          | EFI CWD  | China CWD |
|----------------------------------|------------------------------------------|----------------------|-------|-----|-----|------|------|-----|-----|-----|---------------------------------|----------|----------|-----------|
|                                  |                                          | Highest<br>Frequency | Total | AFA | API | EURO | MENA | HIS | NAM | UNK | HLA-DPB1 IPD-<br>IMGT/HLA 3.9.0 | Category | Category | Category  |
|                                  |                                          |                      |       |     |     |      |      |     |     |     |                                 |          |          |           |
| DPB1*281:01                      | P                                        | C                    | WD    |     |     |      | C    |     |     |     | DPB1*281:01                     |          |          |           |
| DPB1*282:01                      | P                                        | WD                   | WD    |     |     | WD   |      |     |     |     | DPB1*282:01                     |          |          |           |
| DPB1*283:01                      | P                                        | WD                   | WD    |     |     | WD   |      |     |     |     | DPB1*283:01                     |          |          |           |
| DPB1*284:01                      | P                                        | WD                   | WD    |     |     | WD   |      |     |     |     | DPB1*284:01                     |          |          |           |
| DPB1*285:01                      | P                                        | WD                   | WD    |     |     | WD   |      |     |     |     | DPB1*285:01                     |          |          |           |
| DPB1*288:01                      | P                                        | WD                   | WD    |     |     |      |      |     |     |     | DPB1*288:01                     |          |          |           |
| DPB1*290:01                      | P                                        | WD                   | WD    | WD  |     | WD   |      |     |     |     | DPB1*290:01                     |          |          |           |
| DPB1*291:01                      | P                                        | WD                   | WD    |     |     | WD   |      |     |     |     | DPB1*291:01                     |          |          |           |
| DPB1*294:01                      | P                                        | WD                   | WD    |     |     | WD   |      |     |     |     | DPB1*294:01                     |          |          |           |
| DPB1*295:01                      | P                                        | WD                   | WD    |     |     | WD   |      |     |     |     | DPB1*295:01                     |          |          |           |
| DPB1*300:01                      | P                                        | I                    | WD    |     | I   |      |      |     |     |     | DPB1*300:01                     |          |          |           |
| DPB1*301:01                      | P                                        | WD                   | WD    |     |     | WD   |      |     |     |     | DPB1*301:01                     |          |          |           |
| DPB1*303:01                      | P                                        | WD                   | WD    |     |     |      |      |     |     |     | DPB1*303:01                     |          |          |           |
| DPB1*305:01                      | P                                        | WD                   | WD    |     |     |      |      |     |     |     | DPB1*305:01                     |          |          |           |
| DPB1*309:01                      | P                                        | WD                   | WD    |     |     | WD   |      |     |     |     | DPB1*309:01                     |          |          |           |
| DPB1*312:01                      | P                                        | WD                   | WD    |     |     | WD   |      |     |     |     | DPB1*312:01                     |          |          |           |
| DPB1*313:01                      | P                                        | WD                   | WD    |     |     | WD   |      |     |     |     | DPB1*313:01                     |          |          |           |
| DPB1*314:01                      | P                                        | WD                   | WD    |     |     |      |      |     |     |     | DPB1*314:01                     |          |          |           |
| DPB1*318:01                      | P                                        | WD                   | WD    |     |     | WD   |      |     |     |     | DPB1*318:01                     |          |          |           |
| DPB1*319:01                      | P                                        | WD                   | WD    |     |     |      |      |     |     |     | DPB1*319:01                     |          |          |           |
| DPB1*320:01                      | P                                        | WD                   | WD    |     |     | WD   |      |     |     |     | DPB1*320:01                     |          |          |           |
| DPB1*321:01                      | P                                        | WD                   | WD    | WD  |     |      |      |     |     |     | DPB1*321:01                     |          |          |           |
| DPB1*329:01                      | P                                        | WD                   | WD    |     |     |      |      |     |     |     | DPB1*329:01                     |          |          |           |
| DPB1*333:01                      | P                                        | WD                   | WD    |     |     |      |      | WD  |     |     | DPB1*333:01                     |          |          |           |
| DPB1*339:01                      | P                                        | WD                   | WD    |     |     | WD   |      |     |     |     | DPB1*339:01                     |          |          |           |
| DPB1*340:01                      | P                                        | WD                   | WD    |     |     | WD   |      |     |     |     | DPB1*340:01                     |          |          |           |
| DPB1*345:01                      | P                                        | WD                   | WD    |     |     | WD   |      |     |     |     | DPB1*345:01                     |          |          |           |
| DPB1*348:01                      | P                                        | WD                   | WD    |     |     | WD   |      |     |     |     | DPB1*348:01                     |          |          |           |

Supplementary Table 3g. Comparison of HLA-DPB1 P group two-field assignments among CIWD catalogs <sup>a</sup>

| HLA-DPB1 IPD-<br>HLA/IMGT 3.31.0 | Nomenclature<br>Designation <sup>a</sup> | 3.0.0 CIWD           |       |                                     |     |      |      |     |     |     | 2.0.0 CWD                       |          | EFI CWD  | China CWD |
|----------------------------------|------------------------------------------|----------------------|-------|-------------------------------------|-----|------|------|-----|-----|-----|---------------------------------|----------|----------|-----------|
|                                  |                                          | Highest<br>Frequency | Total | Category by Population <sup>b</sup> |     |      |      |     |     |     | HLA-DPB1 IPD-<br>IMGT/HLA 3.9.0 | Category | Category | Category  |
|                                  |                                          |                      |       | AFA                                 | API | EURO | MENA | HIS | NAM | UNK |                                 |          |          |           |
| DPB1*355:01                      | P                                        | WD                   | WD    |                                     |     | WD   |      |     |     |     | DPB1*355:01                     |          |          |           |
| DPB1*356:01                      | P                                        | WD                   | WD    |                                     | WD  |      |      |     |     |     | DPB1*356:01                     |          |          |           |
| DPB1*357:01N                     | N                                        | WD                   | WD    |                                     | WD  |      |      |     |     |     | DPB1*357:01N                    |          |          |           |
| DPB1*358:01                      | P                                        | WD                   | WD    |                                     |     | WD   |      |     |     |     | DPB1*358:01                     |          |          |           |
| DPB1*363:01                      | P                                        | WD                   | WD    |                                     | WD  |      |      |     |     |     | DPB1*363:01                     |          |          |           |
| DPB1*370:01                      | P                                        | WD                   | WD    |                                     |     |      |      |     |     |     | DPB1*370:01                     |          |          |           |
| DPB1*374:01                      | P                                        | WD                   | WD    |                                     |     |      |      |     |     |     | DPB1*374:01                     |          |          |           |
| DPB1*377:01                      | P                                        | WD                   | WD    |                                     |     | WD   |      |     |     |     | DPB1*377:01                     |          |          |           |
| DPB1*391:01                      | P                                        | WD                   | WD    |                                     | WD  |      |      |     |     |     | DPB1*391:01                     |          |          |           |
| DPB1*393:01                      | P                                        | WD                   | WD    |                                     |     | WD   |      |     |     |     | DPB1*393:01                     |          |          |           |
| DPB1*394:01                      | P                                        | WD                   | WD    |                                     | WD  |      |      |     |     |     | DPB1*394:01                     |          |          |           |
| DPB1*396:01                      | P                                        | WD                   | WD    |                                     |     |      |      |     |     |     | DPB1*396:01                     |          |          |           |
| DPB1*397:01                      | P                                        | WD                   | WD    |                                     |     | WD   |      |     |     |     | DPB1*397:01                     |          |          |           |
| DPB1*398:01                      | P                                        | WD                   | WD    |                                     |     | WD   |      |     |     |     | DPB1*398:01                     |          |          |           |
| DPB1*412:01                      | P                                        | WD                   | WD    |                                     |     | WD   |      |     |     |     | DPB1*412:01                     |          |          |           |
| DPB1*413:01                      | P                                        | WD                   | WD    |                                     |     | WD   |      |     |     |     | DPB1*413:01                     |          |          |           |
| DPB1*422:01                      | P                                        | WD                   | WD    |                                     |     |      |      |     |     |     | DPB1*422:01                     |          |          |           |
| DPB1*424:01                      | P                                        | WD                   | WD    |                                     |     |      |      |     |     |     | DPB1*424:01                     |          |          |           |
| DPB1*433:01                      | P                                        | WD                   | WD    |                                     |     |      |      |     |     | WD  | DPB1*433:01                     |          |          |           |
| DPB1*441:01                      | P                                        | WD                   | WD    | WD                                  |     |      |      |     |     |     | DPB1*441:01                     |          |          |           |
| DPB1*445:01                      | P                                        | I                    | WD    |                                     | I   |      |      |     |     |     | DPB1*445:01                     |          |          |           |
| DPB1*448:01                      | P                                        | WD                   | WD    |                                     | WD  |      |      |     |     |     | DPB1*448:01                     |          |          |           |
| DPB1*454:01                      | P                                        | WD                   | WD    |                                     | WD  |      |      |     |     |     | DPB1*454:01                     |          |          |           |
| DPB1*474:01                      | P                                        | WD                   | WD    |                                     | WD  |      |      |     |     |     | DPB1*474:01                     |          |          |           |
| DPB1*482:01                      | P                                        | WD                   | WD    |                                     |     |      |      |     |     |     | DPB1*482:01                     |          |          |           |
| DPB1*486:01                      | P                                        | WD                   | WD    |                                     | WD  |      |      |     |     |     | DPB1*486:01                     |          |          |           |
| DPB1*495:01                      | P                                        | WD                   | WD    | WD                                  |     |      |      |     |     |     | DPB1*495:01                     |          |          |           |
| DPB1*501:01                      | P                                        | WD                   | WD    |                                     |     | WD   | WD   |     |     |     | DPB1*501:01                     |          |          |           |

**Supplementary Table 3g. Comparison of HLA-DPB1 P group two-field assignments among CIWD catalogs <sup>a</sup>**

|                                  |                                          | 3.0.0 CIWD                          |       |     |     |      |      |     |     |     | 2.0.0 CWD                       |          | EFI CWD  | China CWD |
|----------------------------------|------------------------------------------|-------------------------------------|-------|-----|-----|------|------|-----|-----|-----|---------------------------------|----------|----------|-----------|
|                                  |                                          | Category by Population <sup>b</sup> |       |     |     |      |      |     |     |     |                                 |          |          |           |
| HLA-DPB1 IPD-<br>HLA/IMGT 3.31.0 | Nomenclature<br>Designation <sup>a</sup> | Highest<br>Frequency                | Total | AFA | API | EURO | MENA | HIS | NAM | UNK | HLA-DPB1 IPD-<br>IMGT/HLA 3.9.0 | Category | Category | Category  |
| DPB1*503:01                      | P                                        | WD                                  | WD    |     |     |      |      |     |     |     | DPB1*503:01                     |          |          |           |
| DPB1*514:01                      | P                                        | WD                                  | WD    |     |     | WD   |      |     |     |     | DPB1*514:01                     |          |          |           |
| DPB1*520:01                      | P                                        | WD                                  | WD    |     | WD  |      |      |     |     |     | DPB1*520:01                     |          |          |           |
| DPB1*521:01                      | P                                        | WD                                  | WD    |     |     |      |      |     |     |     | DPB1*521:01                     |          |          |           |
| DPB1*526:01                      | P                                        | I                                   | WD    |     | I   |      |      |     |     |     | DPB1*526:01                     |          |          |           |
| DPB1*559:01                      | P                                        | WD                                  | WD    |     |     |      |      |     |     |     | DPB1*559:01                     |          |          |           |
| DPB1*570:01N                     | N                                        | WD                                  | WD    |     | WD  |      |      |     |     |     | DPB1*570:01N                    |          |          |           |

C, common; I, intermediate; WD, well-documented

<sup>a</sup> Alleles observed at least five times in any population group in the current dataset are included in this table. The exception are alleles that were observed in previous catalogs but that are not present or are observed less than five times. Note that this two-field designation is the equivalent of a "P" assignment so that alleles within a P group that encodes a protein that differs outside of the antigen recognition domain are not listed separately (e.g., DPB1\*105:01 is within the DPB1\*04:02P assignment and is not listed in this table even though it was categorized as common in 2.0.0 CWD). The table does not list all alleles from IPD-IMGT/HLA version 3.31.0.

<sup>b</sup> Population groups include: AFA (African/African American), API (Asian/Pacific Islander), EURO (European/European descent), MENA (Middle East/North Coast of Africa), HIS (Hispanic), NAM (Native American) and UNK (unknown, multiple ancestries or other). Total is the overall population i.e., all groups combined. Highest frequency is the highest CIWD designation among all the individual groups.

<sup>c</sup> Not-CIWD, o.
