# Supplementary material for: Common, intermediate and well‐documented HLA alleles in world populations: CIWD version 3.0.0
Source: PubMed Central journal article supplement (PMC7317522; doi:10.1111/tan.13811), 2020-01-31
Supplement: TAN-95-516-s008.pdf [file TAN-95-516-s008.pdf]

| Supplemental Table 8: HLA-A Allele Summary <sup>a</sup> |                        |          | Allele Count by Population Group <sup>b</sup> |              |               |                |              |              |             |               |                | 3.0.0 CIWD Category by Population Group <sup>c</sup> |          |          |          |          |          |          |          |                   |
|---------------------------------------------------------|------------------------|----------|-----------------------------------------------|--------------|---------------|----------------|--------------|--------------|-------------|---------------|----------------|------------------------------------------------------|----------|----------|----------|----------|----------|----------|----------|-------------------|
| Allele                                                  | Genomic Typing         | AlleleID | G group                                       | AFA          | API           | EURO           | MENA         | HIS          | NAM         | UNK           | Total          | AFA                                                  | API      | EURO     | MENA     | HIS      | NAM      | UNK      | Total    | Highest Frequency |
| <b>A*01:01 total</b>                                    | <b>01:01 total</b>     |          |                                               | <b>16351</b> | <b>137296</b> | <b>1738123</b> | <b>42210</b> | <b>48018</b> | <b>4820</b> | <b>161367</b> | <b>2148185</b> | <b>C</b>                                             | <b>C</b> | <b>C</b> | <b>C</b> | <b>C</b> | <b>C</b> | <b>C</b> | <b>C</b> | <b>C</b>          |
| A*01:01                                                 | 01:01                  |          |                                               | 22           | 38            | 7077           | 44           | 14           | 0           | 397           | 7592           | WD                                                   | I        | C        | C        | I        |          | C        | C        | C                 |
| A*01:01P                                                | 01:01P                 |          |                                               | 2            | 8             | 1650           | 8            | 3            | 0           | 14            | 1685           |                                                      | WD       | C        | WD       |          |          | I        | C        | C                 |
| <b>A*01:01:01G total</b>                                | <b>01:01:01G total</b> |          |                                               | <b>16324</b> | <b>137237</b> | <b>1728999</b> | <b>42154</b> | <b>47996</b> | <b>4820</b> | <b>160931</b> | <b>2138461</b> | <b>C</b>                                             | <b>C</b> | <b>C</b> | <b>C</b> | <b>C</b> | <b>C</b> | <b>C</b> | <b>C</b> | <b>C</b>          |
| A*01:01:01G                                             | 01:01:01G              |          | 01:01:01G                                     | 13556        | 130495        | 1651061        | 40798        | 36760        | 3834        | 151106        | 2027610        | C                                                    | C        | C        | C        | C        | C        | C        | C        | C                 |
| A*01:01:01                                              | 01:01:01               |          | 01:01:01G                                     | 713          | 1613          | 20350          | 303          | 2679         | 215         | 2446          | 28319          | C                                                    | C        | C        | C        | C        | C        | C        | C        | C                 |
| A*01:01:01:01                                           | 01:01:01:01            | HLA00001 | 01:01:01G                                     | 2050         | 4870          | 57439          | 1043         | 8528         | 765         | 7341          | 82036          | C                                                    | C        | C        | C        | C        | C        | C        | C        | C                 |
| A*01:01:01:03                                           | 01:01:01:03            | HLA14798 | 01:01:01G                                     | 4            | 257           | 73             | 10           | 19           | 6           | 24            | 393            |                                                      | C        | WD       | WD       | I        | WD       | I        | I        | C                 |
| A*01:01:01:05                                           | 01:01:01:05            | HLA16415 | 01:01:01G                                     | 0            | 0             | 0              | 0            | 0            | 0           | 1             | 1              |                                                      |          |          |          |          |          |          |          |                   |
| A*01:01:01:06                                           | 01:01:01:06            | HLA16417 | 01:01:01G                                     | 0            | 0             | 0              | 0            | 0            | 0           | 1             | 1              |                                                      |          |          |          |          |          |          |          |                   |
| A*01:01:01:07                                           | 01:01:01:07            | HLA16436 | 01:01:01G                                     | 0            | 0             | 0              | 0            | 2            | 0           | 1             | 3              |                                                      |          |          |          |          |          |          |          |                   |
| A*01:01:01:09                                           | 01:01:01:09            | HLA16652 | 01:01:01G                                     | 0            | 0             | 2              | 0            | 2            | 0           | 0             | 4              |                                                      |          |          |          |          |          |          |          |                   |
| A*01:01:38L                                             | 01:01:38L              | HLA03587 | 01:01:01G                                     | 0            | 0             | 1              | 0            | 0            | 0           | 0             | 1              |                                                      |          |          |          |          |          |          |          |                   |
| A*01:04N                                                | 01:04N                 | HLA00004 | 01:01:01G                                     | 0            | 0             | 6              | 0            | 0            | 0           | 0             | 6              |                                                      |          | WD       |          |          |          |          | WD       | WD                |
| A*01:22N                                                | 01:22N                 | HLA02878 | 01:01:01G                                     | 0            | 0             | 0              | 0            | 0            | 0           | 1             | 1              |                                                      |          |          |          |          |          |          |          |                   |
| A*01:32                                                 | 01:32                  | HLA03522 | 01:01:01G                                     | 0            | 0             | 5              | 0            | 0            | 0           | 1             | 6              |                                                      |          | WD       |          |          |          |          | WD       | WD                |
| A*01:37                                                 | 01:37                  | HLA03831 | 01:01:01G                                     | 1            | 0             | 59             | 0            | 6            | 0           | 9             | 75             |                                                      |          | WD       |          | WD       |          | WD       | WD       | WD                |
| A*01:81                                                 | 01:81                  | HLA05908 | 01:01:01G                                     | 0            | 0             | 1              | 0            | 0            | 0           | 0             | 1              |                                                      |          |          |          |          |          |          |          |                   |
| A*01:109                                                | 01:109                 | HLA07807 | 01:01:01G                                     | 0            | 1             | 1              | 0            | 0            | 0           | 0             | 2              |                                                      |          |          |          |          |          |          |          |                   |
| A*01:155                                                | 01:155                 | HLA11389 | 01:01:01G                                     | 0            | 0             | 1              | 0            | 0            | 0           | 0             | 1              |                                                      |          |          |          |          |          |          |          |                   |
| A*01:177                                                | 01:177                 | HLA13225 | 01:01:01G                                     | 0            | 1             | 0              | 0            | 0            | 0           | 0             | 1              |                                                      |          |          |          |          |          |          |          |                   |
| A*01:01:02                                              | 01:01:02               | HLA01244 |                                               | 0            | 0             | 19             | 0            | 0            | 0           | 4             | 23             |                                                      |          | WD       |          |          |          |          | WD       | WD                |
| A*01:01:03                                              | 01:01:03               | HLA01971 |                                               | 0            | 5             | 139            | 0            | 2            | 0           | 1             | 147            |                                                      | WD       | I        |          |          |          |          | WD       | I                 |
| A*01:01:04                                              | 01:01:04               | HLA02540 |                                               | 0            | 0             | 2              | 0            | 0            | 0           | 0             | 2              |                                                      |          |          |          |          |          |          |          |                   |
| A*01:01:05                                              | 01:01:05               | HLA03131 |                                               | 0            | 4             | 6              | 0            | 0            | 0           | 0             | 10             |                                                      |          | WD       |          |          |          |          | WD       | WD                |
| A*01:01:06                                              | 01:01:06               | HLA03742 |                                               | 0            | 0             | 4              | 0            | 0            | 0           | 0             | 4              |                                                      |          |          |          |          |          |          |          |                   |
| A*01:01:09                                              | 01:01:09               | HLA04425 |                                               | 0            | 0             | 4              | 0            | 0            | 0           | 0             | 4              |                                                      |          |          |          |          |          |          |          |                   |
| A*01:01:10                                              | 01:01:10               | HLA04427 |                                               | 0            | 0             | 48             | 0            | 0            | 0           | 1             | 49             |                                                      |          | WD       |          |          |          |          | WD       | WD                |
| A*01:01:11                                              | 01:01:11               | HLA04470 |                                               | 0            | 0             | 30             | 0            | 0            | 0           | 5             | 35             |                                                      |          | WD       |          |          |          | WD       | WD       | WD                |
| A*01:01:13                                              | 01:01:13               | HLA04558 |                                               | 0            | 0             | 13             | 0            | 0            | 0           | 4             | 17             |                                                      |          | WD       |          |          |          |          | WD       | WD                |

| Supplemental Table 8: HLA-A Allele Summary <sup>a</sup> |                |          | Allele Count by Population Group <sup>b</sup> |     |     |      |      |     |     |     |       | 3.0.0 CIWD Category by Population Group <sup>c</sup> |     |      |      |     |     |     |       |                   |  |
|---------------------------------------------------------|----------------|----------|-----------------------------------------------|-----|-----|------|------|-----|-----|-----|-------|------------------------------------------------------|-----|------|------|-----|-----|-----|-------|-------------------|--|
| Allele                                                  | Genomic Typing | AlleleID | G group                                       | AFA | API | EURO | MENA | HIS | NAM | UNK | Total | AFA                                                  | API | EURO | MENA | HIS | NAM | UNK | Total | Highest Frequency |  |
| A*01:01:14                                              | 01:01:14       | HLA04804 |                                               | 0   | 0   | 1    | 0    | 0   | 0   | 0   | 1     |                                                      |     |      |      |     |     |     |       |                   |  |
| A*01:01:16                                              | 01:01:16       | HLA05319 |                                               | 0   | 0   | 23   | 0    | 0   | 0   | 0   | 23    |                                                      |     | WD   |      |     |     |     | WD    | WD                |  |
| A*01:01:17                                              | 01:01:17       | HLA05326 |                                               | 0   | 0   | 1    | 1    | 0   | 0   | 1   | 3     |                                                      |     |      |      |     |     |     |       |                   |  |
| A*01:01:18                                              | 01:01:18       | HLA05332 |                                               | 0   | 0   | 7    | 0    | 0   | 0   | 0   | 7     |                                                      |     | WD   |      |     |     |     | WD    | WD                |  |
| A*01:01:19                                              | 01:01:19       | HLA05348 |                                               | 0   | 0   | 1    | 0    | 0   | 0   | 0   | 1     |                                                      |     |      |      |     |     |     |       |                   |  |
| A*01:01:20                                              | 01:01:20       | HLA05546 |                                               | 0   | 0   | 1    | 0    | 0   | 0   | 0   | 1     |                                                      |     |      |      |     |     |     |       |                   |  |
| A*01:01:21                                              | 01:01:21       | HLA05662 |                                               | 0   | 2   | 4    | 1    | 0   | 0   | 0   | 7     |                                                      |     |      |      |     |     |     | WD    | WD                |  |
| A*01:01:22                                              | 01:01:22       | HLA05684 |                                               | 0   | 0   | 7    | 0    | 0   | 0   | 0   | 7     |                                                      |     | WD   |      |     |     |     | WD    | WD                |  |
| A*01:01:23                                              | 01:01:23       | HLA05685 |                                               | 0   | 0   | 1    | 1    | 0   | 0   | 0   | 2     |                                                      |     |      |      |     |     |     |       |                   |  |
| A*01:01:24                                              | 01:01:24       | HLA05725 |                                               | 0   | 0   | 1    | 0    | 0   | 0   | 0   | 1     |                                                      |     |      |      |     |     |     |       |                   |  |
| A*01:01:25                                              | 01:01:25       | HLA05726 |                                               | 0   | 0   | 1    | 0    | 0   | 0   | 0   | 1     |                                                      |     |      |      |     |     |     |       |                   |  |
| A*01:01:26                                              | 01:01:26       | HLA05907 |                                               | 0   | 0   | 3    | 0    | 0   | 0   | 0   | 3     |                                                      |     |      |      |     |     |     |       |                   |  |
| A*01:01:27                                              | 01:01:27       | HLA05933 |                                               | 0   | 0   | 1    | 0    | 0   | 0   | 0   | 1     |                                                      |     |      |      |     |     |     |       |                   |  |
| A*01:01:28                                              | 01:01:28       | HLA05934 |                                               | 0   | 0   | 1    | 0    | 0   | 0   | 0   | 1     |                                                      |     |      |      |     |     |     |       |                   |  |
| A*01:01:29                                              | 01:01:29       | HLA05968 |                                               | 0   | 0   | 12   | 0    | 0   | 0   | 0   | 12    |                                                      |     | WD   |      |     |     |     | WD    | WD                |  |
| A*01:01:30                                              | 01:01:30       | HLA05988 |                                               | 0   | 0   | 0    | 1    | 0   | 0   | 0   | 1     |                                                      |     |      |      |     |     |     |       |                   |  |
| A*01:01:32                                              | 01:01:32       | HLA06020 |                                               | 0   | 0   | 1    | 0    | 0   | 0   | 0   | 1     |                                                      |     |      |      |     |     |     |       |                   |  |
| A*01:01:33                                              | 01:01:33       | HLA06097 |                                               | 0   | 0   | 37   | 0    | 0   | 0   | 1   | 38    |                                                      |     | WD   |      |     |     |     | WD    | WD                |  |
| A*01:01:34                                              | 01:01:34       | HLA06103 |                                               | 0   | 1   | 1    | 0    | 3   | 0   | 1   | 6     |                                                      |     |      |      |     |     |     | WD    | WD                |  |
| A*01:01:39                                              | 01:01:39       | HLA06745 |                                               | 0   | 0   | 1    | 0    | 0   | 0   | 0   | 1     |                                                      |     |      |      |     |     |     |       |                   |  |
| A*01:01:41                                              | 01:01:41       | HLA06790 |                                               | 0   | 0   | 1    | 0    | 0   | 0   | 0   | 1     |                                                      |     |      |      |     |     |     |       |                   |  |
| A*01:01:44                                              | 01:01:44       | HLA07605 |                                               | 0   | 0   | 2    | 0    | 0   | 0   | 0   | 2     |                                                      |     |      |      |     |     |     |       |                   |  |
| A*01:01:45                                              | 01:01:45       | HLA07674 |                                               | 0   | 0   | 3    | 0    | 0   | 0   | 0   | 3     |                                                      |     |      |      |     |     |     |       |                   |  |
| A*01:01:47                                              | 01:01:47       | HLA07994 |                                               | 0   | 0   | 8    | 0    | 0   | 0   | 3   | 11    |                                                      |     | WD   |      |     |     |     | WD    | WD                |  |
| A*01:01:52                                              | 01:01:52       | HLA08966 |                                               | 0   | 0   | 4    | 0    | 0   | 0   | 0   | 4     |                                                      |     |      |      |     |     |     |       |                   |  |
| A*01:01:53                                              | 01:01:53       | HLA08968 |                                               | 3   | 0   | 1    | 0    | 0   | 0   | 0   | 4     |                                                      |     |      |      |     |     |     |       |                   |  |
| A*01:01:54                                              | 01:01:54       | HLA09414 |                                               | 0   | 0   | 3    | 0    | 0   | 0   | 1   | 4     |                                                      |     |      |      |     |     |     |       |                   |  |
| A*01:01:55                                              | 01:01:55       | HLA09415 |                                               | 0   | 0   | 2    | 0    | 0   | 0   | 0   | 2     |                                                      |     |      |      |     |     |     |       |                   |  |
| A*01:01:56                                              | 01:01:56       | HLA09417 |                                               | 0   | 0   | 2    | 0    | 0   | 0   | 0   | 2     |                                                      |     |      |      |     |     |     |       |                   |  |
| A*01:01:60                                              | 01:01:60       | HLA11306 |                                               | 0   | 1   | 0    | 0    | 0   | 0   | 0   | 1     |                                                      |     |      |      |     |     |     |       |                   |  |

| Supplemental Table 8: HLA-A Allele Summary <sup>a</sup> |                        |          | Allele Count by Population Group <sup>b</sup> |            |            |             |             |            |          |             |             | 3.0.0 CIWD Category by Population Group <sup>c</sup> |          |           |          |          |           |           |           |                   |
|---------------------------------------------------------|------------------------|----------|-----------------------------------------------|------------|------------|-------------|-------------|------------|----------|-------------|-------------|------------------------------------------------------|----------|-----------|----------|----------|-----------|-----------|-----------|-------------------|
| Allele                                                  | Genomic Typing         | AlleleID | G group                                       | AFA        | API        | EURO        | MENA        | HIS        | NAM      | UNK         | Total       | AFA                                                  | API      | EURO      | MENA     | HIS      | NAM       | UNK       | Total     | Highest Frequency |
| A*01:01:62                                              | 01:01:62               | HLA11401 |                                               | 0          | 0          | 0           | 0           | 0          | 0        | 1           | 1           |                                                      |          |           |          |          |           |           |           |                   |
| A*01:01:65                                              | 01:01:65               | HLA11990 |                                               | 0          | 0          | 1           | 0           | 0          | 0        | 0           | 1           |                                                      |          |           |          |          |           |           |           |                   |
| A*01:01:66                                              | 01:01:66               | HLA11991 |                                               | 0          | 0          | 2           | 0           | 0          | 0        | 0           | 2           |                                                      |          |           |          |          |           |           |           |                   |
| A*01:01:69                                              | 01:01:69               | HLA12963 |                                               | 0          | 0          | 2           | 0           | 0          | 0        | 1           | 3           |                                                      |          |           |          |          |           |           |           |                   |
| A*01:01:71                                              | 01:01:71               | HLA13620 |                                               | 0          | 0          | 1           | 0           | 0          | 0        | 0           | 1           |                                                      |          |           |          |          |           |           |           |                   |
| A*01:01:72                                              | 01:01:72               | HLA13705 |                                               | 0          | 0          | 1           | 0           | 0          | 0        | 0           | 1           |                                                      |          |           |          |          |           |           |           |                   |
| A*01:01:73                                              | 01:01:73               | HLA14075 |                                               | 0          | 0          | 0           | 0           | 0          | 0        | 1           | 1           |                                                      |          |           |          |          |           |           |           |                   |
| A*01:01:75                                              | 01:01:75               | HLA14640 |                                               | 0          | 0          | 0           | 0           | 0          | 0        | 1           | 1           |                                                      |          |           |          |          |           |           |           |                   |
| A*01:02                                                 | 01:02                  | HLA00002 |                                               | 1916       | 27         | 1980        | 187         | 1356       | 132      | 961         | 6559        | C                                                    | I        | C         | C        | C        | C         | C         | C         | C                 |
| <b>A*01:03 total</b>                                    | <b>01:03 total</b>     |          |                                               | <b>929</b> | <b>159</b> | <b>2904</b> | <b>1304</b> | <b>137</b> | <b>6</b> | <b>1479</b> | <b>6918</b> | <b>C</b>                                             | <b>C</b> | <b>C</b>  | <b>C</b> | <b>C</b> | <b>WD</b> | <b>C</b>  | <b>C</b>  | <b>C</b>          |
| <b>A*01:03:01G total</b>                                | <b>01:03:01G total</b> |          |                                               | <b>929</b> | <b>159</b> | <b>2904</b> | <b>1304</b> | <b>137</b> | <b>6</b> | <b>1479</b> | <b>6918</b> | <b>C</b>                                             | <b>C</b> | <b>C</b>  | <b>C</b> | <b>C</b> | <b>WD</b> | <b>C</b>  | <b>C</b>  | <b>C</b>          |
| A*01:03                                                 | 01:03                  |          |                                               | 863        | 138        | 2730        | 1261        | 126        | 6        | 1414        | 6538        | C                                                    | C        | C         | C        | C        | WD        | C         | C         | C                 |
| A*01:03:01G                                             | 01:03:01G              |          | 01:03:01G                                     | 28         | 18         | 138         | 10          | 1          | 0        | 12          | 207         | WD                                                   | I        | I         | WD       |          |           | WD        | I         | I                 |
| A*01:03:01                                              | 01:03:01               |          | 01:03:01G                                     | 28         | 0          | 8           | 14          | 1          | 0        | 50          | 101         | WD                                                   |          | WD        | WD       |          |           | I         | WD        | I                 |
| A*01:03:01:01                                           | 01:03:01:01            | HLA00003 | 01:03:01G                                     | 7          | 1          | 2           | 13          | 0          | 0        | 0           | 23          | WD                                                   |          |           | WD       |          |           |           | WD        | WD                |
| A*01:03:01:02                                           | 01:03:01:02            | HLA17076 | 01:03:01G                                     | 3          | 2          | 26          | 6           | 9          | 0        | 3           | 49          |                                                      |          | WD        | WD       | I        |           |           | WD        | I                 |
| A*01:06                                                 | 01:06                  | HLA01031 |                                               | 2          | 2          | 730         | 87          | 8          | 0        | 30          | 859         |                                                      |          | I         | C        | I        |           | I         | I         | C                 |
| A*01:08                                                 | 01:08                  | HLA01292 |                                               | 0          | 0          | 1           | 0           | 0          | 0        | 0           | 1           |                                                      |          |           |          |          |           |           |           |                   |
| <b>A*01:09 total</b>                                    | <b>01:09 total</b>     |          |                                               | <b>70</b>  | <b>4</b>   | <b>7</b>    | <b>1</b>    | <b>1</b>   | <b>0</b> | <b>11</b>   | <b>94</b>   | <b>C</b>                                             |          | <b>WD</b> |          |          |           | <b>WD</b> | <b>WD</b> | <b>C</b>          |
| A*01:09                                                 | 01:09                  |          |                                               | 49         | 3          | 6           | 1           | 1          | 0        | 7           | 67          | C                                                    |          | WD        |          |          |           | WD        | WD        | C                 |
| <b>A*01:09:01G total</b>                                | <b>01:09:01G total</b> |          |                                               | <b>21</b>  | <b>1</b>   | <b>1</b>    | <b>0</b>    | <b>0</b>   | <b>0</b> | <b>4</b>    | <b>27</b>   | <b>WD</b>                                            |          |           |          |          |           |           | <b>WD</b> | <b>WD</b>         |
| A*01:09:01                                              | 01:09:01               |          | 01:09:01G                                     | 21         | 1          | 1           | 0           | 0          | 0        | 4           | 27          | WD                                                   |          |           |          |          |           |           | WD        | WD                |
| A*01:12                                                 | 01:12                  | HLA02108 |                                               | 0          | 22         | 0           | 0           | 0          | 0        | 2           | 24          |                                                      | I        |           |          |          |           |           | WD        | I                 |
| A*01:13                                                 | 01:13                  | HLA02110 |                                               | 0          | 1          | 2           | 0           | 0          | 0        | 0           | 3           |                                                      |          |           |          |          |           |           |           |                   |
| A*01:14                                                 | 01:14                  | HLA02152 |                                               | 0          | 1          | 6           | 0           | 0          | 0        | 0           | 7           |                                                      |          | WD        |          |          |           |           | WD        | WD                |
| A*01:15N                                                | 01:15N                 | HLA02183 |                                               | 0          | 0          | 10          | 0           | 0          | 0        | 3           | 13          |                                                      |          | WD        |          |          |           |           | WD        | WD                |
| A*01:16N                                                | 01:16N                 | HLA02310 |                                               | 0          | 0          | 23          | 0           | 0          | 0        | 5           | 28          |                                                      |          | WD        |          |          |           | WD        | WD        | WD                |
| A*01:17                                                 | 01:17                  | HLA02373 |                                               | 1          | 0          | 38          | 1           | 3          | 1        | 5           | 49          |                                                      |          | WD        |          |          |           | WD        | WD        | WD                |
| A*01:18N                                                | 01:18N                 | HLA02484 |                                               | 0          | 0          | 1           | 0           | 0          | 0        | 0           | 1           |                                                      |          |           |          |          |           |           |           |                   |
| A*01:21                                                 | 01:21                  | HLA02857 |                                               | 0          | 0          | 1           | 0           | 0          | 0        | 0           | 1           |                                                      |          |           |          |          |           |           |           |                   |

| Supplemental Table 8: HLA-A Allele Summary <sup>a</sup> |                     |          | Allele Count by Population Group <sup>b</sup> |          |          |          |          |          |          |          |          |     | 3.0.0 CIWD Category by Population Group <sup>c</sup> |      |      |     |     |     |       |                   |
|---------------------------------------------------------|---------------------|----------|-----------------------------------------------|----------|----------|----------|----------|----------|----------|----------|----------|-----|------------------------------------------------------|------|------|-----|-----|-----|-------|-------------------|
| Allele                                                  | Genomic Typing      | AlleleID | G group                                       | AFA      | API      | EURO     | MENA     | HIS      | NAM      | UNK      | Total    | AFA | API                                                  | EURO | MENA | HIS | NAM | UNK | Total | Highest Frequency |
| A*01:23                                                 | 01:23               | HLA02891 |                                               | 9        | 1        | 6        | 17       | 0        | 0        | 7        | 40       | WD  |                                                      | WD   | WD   |     |     | WD  | WD    | WD                |
| A*01:24                                                 | 01:24               | HLA02895 |                                               | 0        | 0        | 3        | 0        | 6        | 0        | 0        | 9        |     |                                                      |      |      | WD  |     |     | WD    | WD                |
| A*01:25                                                 | 01:25               | HLA02897 |                                               | 6        | 2        | 160      | 0        | 1        | 0        | 38       | 207      | WD  |                                                      | I    |      |     |     | I   | I     | I                 |
| A*01:26                                                 | 01:26               | HLA02920 |                                               | 0        | 14       | 25       | 0        | 1        | 1        | 0        | 41       |     | I                                                    | WD   |      |     |     |     | WD    | I                 |
| A*01:28                                                 | 01:28               | HLA02985 |                                               | 0        | 0        | 2        | 0        | 0        | 0        | 1        | 3        |     |                                                      |      |      |     |     |     |       |                   |
| A*01:29                                                 | 01:29               | HLA03029 |                                               | 0        | 0        | 9        | 0        | 0        | 0        | 1        | 10       |     |                                                      | WD   |      |     |     |     | WD    | WD                |
| A*01:30                                                 | 01:30               | HLA03030 |                                               | 0        | 0        | 4        | 0        | 1        | 0        | 0        | 5        |     |                                                      |      |      |     |     |     | WD    | WD                |
| A*01:31N                                                | 01:31N              | HLA03501 |                                               | 0        | 0        | 3        | 1        | 0        | 0        | 0        | 4        |     |                                                      |      |      |     |     |     |       |                   |
| A*01:35                                                 | 01:35               | HLA03688 |                                               | 0        | 0        | 3        | 0        | 0        | 0        | 0        | 3        |     |                                                      |      |      |     |     |     |       |                   |
| A*01:38                                                 | 01:38               | HLA03877 |                                               | 0        | 0        | 27       | 0        | 0        | 0        | 1        | 28       |     |                                                      | WD   |      |     |     |     | WD    | WD                |
| A*01:39                                                 | 01:39               | HLA03879 |                                               | 0        | 0        | 10       | 0        | 0        | 0        | 0        | 10       |     |                                                      | WD   |      |     |     |     | WD    | WD                |
| A*01:40                                                 | 01:40               | HLA03881 |                                               | 0        | 0        | 45       | 0        | 0        | 0        | 1        | 46       |     |                                                      | WD   |      |     |     |     | WD    | WD                |
| A*01:41                                                 | 01:41               | HLA03882 |                                               | 0        | 0        | 2        | 0        | 0        | 0        | 0        | 2        |     |                                                      |      |      |     |     |     |       |                   |
| A*01:42                                                 | 01:42               | HLA03898 |                                               | 0        | 0        | 12       | 0        | 0        | 0        | 0        | 12       |     |                                                      | WD   |      |     |     |     | WD    | WD                |
| A*01:43                                                 | 01:43               | HLA04122 |                                               | 0        | 24       | 1        | 0        | 0        | 0        | 0        | 25       |     | I                                                    |      |      |     |     |     | WD    | I                 |
| A*01:44                                                 | 01:44               | HLA04151 |                                               | 0        | 0        | 5        | 0        | 0        | 0        | 0        | 5        |     |                                                      | WD   |      |     |     |     | WD    | WD                |
| A*01:46                                                 | 01:46               | HLA04469 |                                               | 0        | 0        | 0        | 4        | 0        | 0        | 5        | 9        |     |                                                      |      |      |     |     | WD  | WD    | WD                |
| A*01:48                                                 | 01:48               | HLA04494 |                                               | 0        | 0        | 0        | 0        | 0        | 0        | 12       | 12       |     |                                                      |      |      |     |     | WD  | WD    | WD                |
| A*01:49                                                 | 01:49               | HLA04525 |                                               | 0        | 0        | 2        | 0        | 0        | 0        | 0        | 2        |     |                                                      |      |      |     |     |     |       |                   |
| A*01:50                                                 | 01:50               | HLA04527 |                                               | 0        | 0        | 1        | 0        | 0        | 0        | 0        | 1        |     |                                                      |      |      |     |     |     |       |                   |
| A*01:51                                                 | 01:51               | HLA04546 |                                               | 0        | 0        | 28       | 0        | 0        | 0        | 2        | 30       |     |                                                      | WD   |      |     |     |     | WD    | WD                |
| <b>A*01:52N total</b>                                   | <b>01:52N total</b> |          |                                               | <b>1</b> | <b>0</b> | <b>1</b> | <b>0</b> | <b>0</b> | <b>0</b> | <b>1</b> | <b>3</b> |     |                                                      |      |      |     |     |     |       |                   |
| A*01:52N                                                | 01:52N              |          |                                               | 0        | 0        | 0        | 0        | 0        | 0        | 1        | 1        |     |                                                      |      |      |     |     |     |       |                   |
| A*01:52:01N                                             | 01:52:01N           | HLA04761 |                                               | 1        | 0        | 1        | 0        | 0        | 0        | 0        | 2        |     |                                                      |      |      |     |     |     |       |                   |
| A*01:54                                                 | 01:54               | HLA04808 |                                               | 0        | 0        | 1        | 0        | 0        | 0        | 1        | 2        |     |                                                      |      |      |     |     |     |       |                   |
| A*01:55                                                 | 01:55               | HLA04811 |                                               | 0        | 0        | 1        | 0        | 0        | 0        | 0        | 1        |     |                                                      |      |      |     |     |     |       |                   |
| A*01:57N                                                | 01:57N              | HLA05321 |                                               | 0        | 0        | 8        | 0        | 1        | 0        | 0        | 9        |     |                                                      | WD   |      |     |     |     | WD    | WD                |
| A*01:58                                                 | 01:58               | HLA05323 |                                               | 0        | 2        | 2        | 0        | 0        | 0        | 0        | 4        |     |                                                      |      |      |     |     |     |       |                   |
| A*01:59                                                 | 01:59               | HLA05324 |                                               | 0        | 0        | 1        | 0        | 0        | 0        | 0        | 1        |     |                                                      |      |      |     |     |     |       |                   |
| A*01:60                                                 | 01:60               | HLA05327 |                                               | 0        | 0        | 1        | 0        | 0        | 0        | 0        | 1        |     |                                                      |      |      |     |     |     |       |                   |

| Supplemental Table 8: HLA-A Allele Summary <sup>a</sup> |                    |          | Allele Count by Population Group <sup>b</sup> |          |          |           |          |          |          |          |           |     | 3.0.0 CIWD Category by Population Group <sup>c</sup> |           |      |          |     |     |           |                   |
|---------------------------------------------------------|--------------------|----------|-----------------------------------------------|----------|----------|-----------|----------|----------|----------|----------|-----------|-----|------------------------------------------------------|-----------|------|----------|-----|-----|-----------|-------------------|
| Allele                                                  | Genomic Typing     | AlleleID | G group                                       | AFA      | API      | EURO      | MENA     | HIS      | NAM      | UNK      | Total     | AFA | API                                                  | EURO      | MENA | HIS      | NAM | UNK | Total     | Highest Frequency |
| A*01:61                                                 | 01:61              | HLA05329 |                                               | 0        | 0        | 9         | 1        | 3        | 0        | 0        | 13        |     |                                                      | WD        |      |          |     |     | WD        | WD                |
| A*01:66                                                 | 01:66              | HLA05398 |                                               | 0        | 0        | 1         | 0        | 0        | 0        | 0        | 1         |     |                                                      |           |      |          |     |     |           |                   |
| <b>A*01:67 total</b>                                    | <b>01:67 total</b> |          |                                               | <b>0</b> | <b>0</b> | <b>4</b>  | <b>0</b> | <b>0</b> | <b>0</b> | <b>5</b> | <b>9</b>  |     |                                                      |           |      |          |     | WD  | WD        | WD                |
| A*01:67                                                 | 01:67              |          |                                               | 0        | 0        | 2         | 0        | 0        | 0        | 2        | 4         |     |                                                      |           |      |          |     |     |           |                   |
| A*01:67:01                                              | 01:67:01           | HLA05427 |                                               | 0        | 0        | 1         | 0        | 0        | 0        | 3        | 4         |     |                                                      |           |      |          |     |     |           |                   |
| A*01:67:02                                              | 01:67:02           | HLA11215 |                                               | 0        | 0        | 1         | 0        | 0        | 0        | 0        | 1         |     |                                                      |           |      |          |     |     |           |                   |
| A*01:68                                                 | 01:68              | HLA05429 |                                               | 0        | 0        | 6         | 0        | 0        | 0        | 1        | 7         |     |                                                      | WD        |      |          |     |     | WD        | WD                |
| <b>A*01:69 total</b>                                    | <b>01:69 total</b> |          |                                               | <b>0</b> | <b>1</b> | <b>16</b> | <b>0</b> | <b>5</b> | <b>0</b> | <b>3</b> | <b>25</b> |     |                                                      | <b>WD</b> |      | <b>D</b> |     |     | <b>WD</b> | <b>WD</b>         |
| A*01:69                                                 | 01:69              |          |                                               | 0        | 0        | 4         | 0        | 0        | 0        | 0        | 4         |     |                                                      |           |      |          |     |     |           |                   |
| A*01:69:01                                              | 01:69:01           | HLA05432 |                                               | 0        | 1        | 7         | 0        | 0        | 0        | 1        | 9         |     |                                                      | WD        |      |          |     |     | WD        | WD                |
| A*01:69:02                                              | 01:69:02           | HLA07473 |                                               | 0        | 0        | 5         | 0        | 5        | 0        | 2        | 12        |     |                                                      | WD        |      | WD       |     |     | WD        | WD                |
| A*01:72                                                 | 01:72              | HLA05630 |                                               | 0        | 0        | 13        | 0        | 0        | 0        | 0        | 13        |     |                                                      | WD        |      |          |     |     | WD        | WD                |
| A*01:73                                                 | 01:73              | HLA05635 |                                               | 0        | 1        | 0         | 0        | 0        | 0        | 0        | 1         |     |                                                      |           |      |          |     |     |           |                   |
| A*01:74                                                 | 01:74              | HLA05648 |                                               | 0        | 12       | 0         | 0        | 1        | 0        | 0        | 13        |     | WD                                                   |           |      |          |     |     | WD        | WD                |
| A*01:76                                                 | 01:76              | HLA05670 |                                               | 0        | 0        | 1         | 0        | 0        | 0        | 0        | 1         |     |                                                      |           |      |          |     |     |           |                   |
| A*01:77                                                 | 01:77              | HLA05838 |                                               | 2        | 0        | 2         | 0        | 0        | 0        | 0        | 4         |     |                                                      |           |      |          |     |     |           |                   |
| A*01:78                                                 | 01:78              | HLA05894 |                                               | 0        | 1        | 0         | 0        | 0        | 0        | 0        | 1         |     |                                                      |           |      |          |     |     |           |                   |
| A*01:80                                                 | 01:80              | HLA05906 |                                               | 0        | 0        | 0         | 0        | 0        | 0        | 1        | 1         |     |                                                      |           |      |          |     |     |           |                   |
| A*01:82                                                 | 01:82              | HLA05932 |                                               | 2        | 27       | 2         | 0        | 0        | 0        | 0        | 31        |     | I                                                    |           |      |          |     |     | WD        | I                 |
| <b>A*01:83 total</b>                                    | <b>01:83 total</b> |          |                                               | <b>0</b> | <b>0</b> | <b>2</b>  | <b>0</b> | <b>0</b> | <b>0</b> | <b>0</b> | <b>2</b>  |     |                                                      |           |      |          |     |     |           |                   |
| A*01:83:02                                              | 01:83:02           | HLA08640 |                                               | 0        | 0        | 2         | 0        | 0        | 0        | 0        | 2         |     |                                                      |           |      |          |     |     |           |                   |
| A*01:86                                                 | 01:86              | HLA06341 |                                               | 0        | 0        | 6         | 3        | 1        | 0        | 11       | 21        |     |                                                      | WD        |      |          |     | WD  | WD        | WD                |
| A*01:89                                                 | 01:89              | HLA06558 |                                               | 0        | 0        | 4         | 0        | 0        | 0        | 0        | 4         |     |                                                      |           |      |          |     |     |           |                   |
| A*01:90                                                 | 01:90              | HLA06561 |                                               | 0        | 0        | 1         | 0        | 0        | 0        | 0        | 1         |     |                                                      |           |      |          |     |     |           |                   |
| A*01:91                                                 | 01:91              | HLA06569 |                                               | 0        | 3        | 1         | 0        | 0        | 0        | 0        | 4         |     |                                                      |           |      |          |     |     |           |                   |
| A*01:92                                                 | 01:92              | HLA06570 |                                               | 0        | 0        | 5         | 0        | 0        | 0        | 0        | 5         |     |                                                      | WD        |      |          |     |     | WD        | WD                |
| A*01:93                                                 | 01:93              | HLA06571 |                                               | 0        | 0        | 1         | 0        | 0        | 0        | 0        | 1         |     |                                                      |           |      |          |     |     |           |                   |
| A*01:94                                                 | 01:94              | HLA06764 |                                               | 0        | 0        | 1         | 0        | 0        | 0        | 0        | 1         |     |                                                      |           |      |          |     |     |           |                   |
| A*01:95                                                 | 01:95              | HLA06765 |                                               | 0        | 0        | 2         | 0        | 0        | 0        | 0        | 2         |     |                                                      |           |      |          |     |     |           |                   |
| A*01:98                                                 | 01:98              | HLA06800 |                                               | 0        | 2        | 43        | 0        | 0        | 0        | 0        | 45        |     |                                                      | WD        |      |          |     |     | WD        | WD                |

| Supplemental Table 8: HLA-A Allele Summary <sup>a</sup> |                |          | Allele Count by Population Group <sup>b</sup> |     |     |      |      |     |     |     |       | 3.0.0 CIWD Category by Population Group <sup>c</sup> |     |      |      |     |     |     |       |                   |  |
|---------------------------------------------------------|----------------|----------|-----------------------------------------------|-----|-----|------|------|-----|-----|-----|-------|------------------------------------------------------|-----|------|------|-----|-----|-----|-------|-------------------|--|
| Allele                                                  | Genomic Typing | AlleleID | G group                                       | AFA | API | EURO | MENA | HIS | NAM | UNK | Total | AFA                                                  | API | EURO | MENA | HIS | NAM | UNK | Total | Highest Frequency |  |
| A*01:99                                                 | 01:99          | HLA06801 |                                               | 0   | 0   | 1    | 0    | 0   | 0   | 0   | 1     |                                                      |     |      |      |     |     |     |       |                   |  |
| A*01:100                                                | 01:100         | HLA06802 |                                               | 0   | 1   | 22   | 0    | 1   | 0   | 0   | 24    |                                                      |     | WD   |      |     |     |     | WD    | WD                |  |
| A*01:101                                                | 01:101         | HLA06813 |                                               | 0   | 0   | 1    | 0    | 0   | 0   | 1   | 2     |                                                      |     |      |      |     |     |     |       |                   |  |
| A*01:104                                                | 01:104         | HLA07404 |                                               | 0   | 9   | 4    | 0    | 3   | 0   | 4   | 20    |                                                      | WD  |      |      |     |     |     | WD    | WD                |  |
| A*01:106                                                | 01:106         | HLA07597 |                                               | 1   | 0   | 2    | 1    | 0   | 0   | 0   | 4     |                                                      |     |      |      |     |     |     |       |                   |  |
| A*01:111                                                | 01:111         | HLA07991 |                                               | 0   | 0   | 1    | 0    | 0   | 0   | 0   | 1     |                                                      |     |      |      |     |     |     |       |                   |  |
| A*01:112                                                | 01:112         | HLA07993 |                                               | 0   | 0   | 1    | 0    | 0   | 0   | 0   | 1     |                                                      |     |      |      |     |     |     |       |                   |  |
| A*01:113                                                | 01:113         | HLA08248 |                                               | 0   | 0   | 12   | 0    | 0   | 0   | 0   | 12    |                                                      |     | WD   |      |     |     |     | WD    | WD                |  |
| A*01:115                                                | 01:115         | HLA08445 |                                               | 0   | 0   | 3    | 0    | 1   | 0   | 0   | 4     |                                                      |     |      |      |     |     |     |       |                   |  |
| A*01:117                                                | 01:117         | HLA08447 |                                               | 0   | 0   | 3    | 0    | 0   | 0   | 0   | 3     |                                                      |     |      |      |     |     |     |       |                   |  |
| A*01:118                                                | 01:118         | HLA08460 |                                               | 0   | 0   | 1    | 2    | 0   | 0   | 0   | 3     |                                                      |     |      |      |     |     |     |       |                   |  |
| A*01:123N                                               | 01:123N        | HLA08895 |                                               | 0   | 0   | 7    | 0    | 0   | 0   | 0   | 7     |                                                      |     | WD   |      |     |     |     | WD    | WD                |  |
| A*01:124                                                | 01:124         | HLA08920 |                                               | 0   | 0   | 2    | 0    | 0   | 0   | 0   | 2     |                                                      |     |      |      |     |     |     |       |                   |  |
| A*01:126                                                | 01:126         | HLA08967 |                                               | 0   | 3   | 3    | 0    | 0   | 0   | 0   | 6     |                                                      |     |      |      |     |     |     | WD    | WD                |  |
| A*01:133                                                | 01:133         | HLA09538 |                                               | 0   | 0   | 2    | 0    | 0   | 0   | 0   | 2     |                                                      |     |      |      |     |     |     |       |                   |  |
| A*01:134                                                | 01:134         | HLA09799 |                                               | 0   | 0   | 1    | 0    | 0   | 0   | 0   | 1     |                                                      |     |      |      |     |     |     |       |                   |  |
| A*01:136                                                | 01:136         | HLA09801 |                                               | 0   | 0   | 1    | 0    | 0   | 0   | 0   | 1     |                                                      |     |      |      |     |     |     |       |                   |  |
| A*01:137                                                | 01:137         | HLA09802 |                                               | 0   | 0   | 1    | 0    | 0   | 0   | 0   | 1     |                                                      |     |      |      |     |     |     |       |                   |  |
| A*01:139                                                | 01:139         | HLA10123 |                                               | 0   | 0   | 1    | 0    | 0   | 0   | 0   | 1     |                                                      |     |      |      |     |     |     |       |                   |  |
| A*01:143                                                | 01:143         | HLA10372 |                                               | 0   | 0   | 4    | 0    | 0   | 0   | 0   | 4     |                                                      |     |      |      |     |     |     |       |                   |  |
| A*01:144                                                | 01:144         | HLA10385 |                                               | 0   | 3   | 0    | 0    | 0   | 0   | 0   | 3     |                                                      |     |      |      |     |     |     |       |                   |  |
| A*01:145                                                | 01:145         | HLA10386 |                                               | 0   | 0   | 0    | 0    | 0   | 0   | 1   | 1     |                                                      |     |      |      |     |     |     |       |                   |  |
| A*01:147Q                                               | 01:147Q        | HLA10914 |                                               | 0   | 0   | 1    | 0    | 0   | 0   | 0   | 1     |                                                      |     |      |      |     |     |     |       |                   |  |
| A*01:148                                                | 01:148         | HLA10978 |                                               | 0   | 0   | 1    | 0    | 0   | 0   | 0   | 1     |                                                      |     |      |      |     |     |     |       |                   |  |
| A*01:149                                                | 01:149         | HLA10979 |                                               | 0   | 0   | 2    | 0    | 0   | 0   | 0   | 2     |                                                      |     |      |      |     |     |     |       |                   |  |
| A*01:150                                                | 01:150         | HLA10980 |                                               | 0   | 2   | 0    | 0    | 0   | 0   | 1   | 3     |                                                      |     |      |      |     |     |     |       |                   |  |
| A*01:154                                                | 01:154         | HLA11400 |                                               | 0   | 0   | 1    | 0    | 0   | 0   | 0   | 1     |                                                      |     |      |      |     |     |     |       |                   |  |
| A*01:156                                                | 01:156         | HLA11799 |                                               | 0   | 0   | 4    | 0    | 0   | 0   | 1   | 5     |                                                      |     |      |      |     |     |     | WD    | WD                |  |
| A*01:157                                                | 01:157         | HLA12078 |                                               | 0   | 0   | 1    | 0    | 0   | 0   | 0   | 1     |                                                      |     |      |      |     |     |     |       |                   |  |
| A*01:159                                                | 01:159         | HLA12112 |                                               | 0   | 0   | 0    | 0    | 0   | 1   | 0   | 1     |                                                      |     |      |      |     |     |     |       |                   |  |

| Supplemental Table 8: HLA-A Allele Summary <sup>a</sup> |                |          | Allele Count by Population Group <sup>b</sup> |     |     |      |      |     |     |     |       |     | 3.0.0 CIWD Category by Population Group <sup>c</sup> |      |      |     |     |     |       |                   |  |
|---------------------------------------------------------|----------------|----------|-----------------------------------------------|-----|-----|------|------|-----|-----|-----|-------|-----|------------------------------------------------------|------|------|-----|-----|-----|-------|-------------------|--|
| Allele                                                  | Genomic Typing | AlleleID | G group                                       | AFA | API | EURO | MENA | HIS | NAM | UNK | Total | AFA | API                                                  | EURO | MENA | HIS | NAM | UNK | Total | Highest Frequency |  |
| A*01:160N                                               | 01:160N        | HLA12113 |                                               | 0   | 0   | 0    | 1    | 0   | 0   | 0   | 1     |     |                                                      |      |      |     |     |     |       |                   |  |
| A*01:162N                                               | 01:162N        | HLA12248 |                                               | 0   | 0   | 2    | 0    | 0   | 0   | 0   | 2     |     |                                                      |      |      |     |     |     |       |                   |  |
| A*01:163                                                | 01:163         | HLA12252 |                                               | 0   | 0   | 0    | 0    | 0   | 0   | 1   | 1     |     |                                                      |      |      |     |     |     |       |                   |  |
| A*01:167                                                | 01:167         | HLA12725 |                                               | 0   | 0   | 3    | 0    | 0   | 0   | 0   | 3     |     |                                                      |      |      |     |     |     |       |                   |  |
| A*01:169                                                | 01:169         | HLA12638 |                                               | 0   | 2   | 0    | 0    | 0   | 0   | 0   | 2     |     |                                                      |      |      |     |     |     |       |                   |  |
| A*01:170                                                | 01:170         | HLA12861 |                                               | 0   | 0   | 2    | 0    | 0   | 0   | 0   | 2     |     |                                                      |      |      |     |     |     |       |                   |  |
| A*01:171                                                | 01:171         | HLA12959 |                                               | 0   | 1   | 1    | 0    | 0   | 0   | 0   | 2     |     |                                                      |      |      |     |     |     |       |                   |  |
| A*01:172                                                | 01:172         | HLA12960 |                                               | 0   | 0   | 0    | 0    | 1   | 0   | 0   | 1     |     |                                                      |      |      |     |     |     |       |                   |  |
| A*01:173                                                | 01:173         | HLA12961 |                                               | 0   | 0   | 3    | 0    | 0   | 0   | 0   | 3     |     |                                                      |      |      |     |     |     |       |                   |  |
| A*01:175                                                | 01:175         | HLA12971 |                                               | 0   | 0   | 0    | 0    | 1   | 0   | 0   | 1     |     |                                                      |      |      |     |     |     |       |                   |  |
| A*01:180                                                | 01:180         | HLA13445 |                                               | 0   | 0   | 1    | 0    | 0   | 0   | 0   | 1     |     |                                                      |      |      |     |     |     |       |                   |  |
| A*01:182                                                | 01:182         | HLA13447 |                                               | 0   | 0   | 0    | 0    | 0   | 0   | 1   | 1     |     |                                                      |      |      |     |     |     |       |                   |  |
| A*01:183                                                | 01:183         | HLA13448 |                                               | 0   | 0   | 0    | 0    | 1   | 0   | 0   | 1     |     |                                                      |      |      |     |     |     |       |                   |  |
| A*01:184                                                | 01:184         | HLA13449 |                                               | 0   | 0   | 1    | 0    | 0   | 0   | 0   | 1     |     |                                                      |      |      |     |     |     |       |                   |  |
| A*01:185                                                | 01:185         | HLA13450 |                                               | 0   | 0   | 0    | 0    | 0   | 0   | 1   | 1     |     |                                                      |      |      |     |     |     |       |                   |  |
| A*01:188                                                | 01:188         | HLA13727 |                                               | 0   | 3   | 1    | 0    | 0   | 0   | 0   | 4     |     |                                                      |      |      |     |     |     |       |                   |  |
| A*01:189                                                | 01:189         | HLA13729 |                                               | 0   | 0   | 0    | 1    | 0   | 0   | 0   | 1     |     |                                                      |      |      |     |     |     |       |                   |  |
| A*01:190                                                | 01:190         | HLA13841 |                                               | 0   | 0   | 6    | 0    | 0   | 0   | 0   | 6     |     |                                                      | WD   |      |     |     |     | WD    | WD                |  |
| A*01:191                                                | 01:191         | HLA13845 |                                               | 0   | 0   | 2    | 0    | 0   | 0   | 0   | 2     |     |                                                      |      |      |     |     |     |       |                   |  |
| A*01:193                                                | 01:193         | HLA13954 |                                               | 0   | 1   | 0    | 0    | 0   | 0   | 0   | 1     |     |                                                      |      |      |     |     |     |       |                   |  |
| A*01:195                                                | 01:195         | HLA13976 |                                               | 0   | 1   | 1    | 0    | 0   | 0   | 0   | 2     |     |                                                      |      |      |     |     |     |       |                   |  |
| A*01:196                                                | 01:196         | HLA14106 |                                               | 0   | 1   | 0    | 0    | 0   | 0   | 0   | 1     |     |                                                      |      |      |     |     |     |       |                   |  |
| A*01:197                                                | 01:197         | HLA14283 |                                               | 0   | 2   | 0    | 0    | 0   | 0   | 0   | 2     |     |                                                      |      |      |     |     |     |       |                   |  |
| A*01:199                                                | 01:199         | HLA14462 |                                               | 0   | 0   | 0    | 1    | 0   | 0   | 0   | 1     |     |                                                      |      |      |     |     |     |       |                   |  |
| A*01:202                                                | 01:202         | HLA14916 |                                               | 0   | 0   | 1    | 0    | 0   | 0   | 0   | 1     |     |                                                      |      |      |     |     |     |       |                   |  |
| A*01:205                                                | 01:205         | HLA15247 |                                               | 0   | 0   | 1    | 0    | 0   | 0   | 0   | 1     |     |                                                      |      |      |     |     |     |       |                   |  |
| A*01:208Q                                               | 01:208Q        | HLA15158 |                                               | 0   | 0   | 2    | 0    | 0   | 0   | 0   | 2     |     |                                                      |      |      |     |     |     |       |                   |  |
| A*01:209                                                | 01:209         | HLA15459 |                                               | 0   | 1   | 0    | 0    | 0   | 0   | 0   | 1     |     |                                                      |      |      |     |     |     |       |                   |  |
| A*01:221                                                | 01:221         | HLA16109 |                                               | 0   | 0   | 1    | 0    | 0   | 0   | 0   | 1     |     |                                                      |      |      |     |     |     |       |                   |  |
| A*01:223                                                | 01:223         | HLA16113 |                                               | 0   | 0   | 1    | 0    | 0   | 0   | 0   | 1     |     |                                                      |      |      |     |     |     |       |                   |  |

| Supplemental Table 8: HLA-A Allele Summary <sup>a</sup> |                        |          | Allele Count by Population Group <sup>b</sup> |              |              |                |              |               |              |               |                | 3.0.0 CIWD Category by Population Group <sup>c</sup> |          |          |          |          |          |          |          |                   |
|---------------------------------------------------------|------------------------|----------|-----------------------------------------------|--------------|--------------|----------------|--------------|---------------|--------------|---------------|----------------|------------------------------------------------------|----------|----------|----------|----------|----------|----------|----------|-------------------|
| Allele                                                  | Genomic Typing         | AlleleID | G group                                       | AFA          | API          | EURO           | MENA         | HIS           | NAM          | UNK           | Total          | AFA                                                  | API      | EURO     | MENA     | HIS      | NAM      | UNK      | Total    | Highest Frequency |
| A*01:231                                                | 01:231                 | HLA16457 |                                               | 0            | 1            | 0              | 0            | 0             | 0            | 0             | 1              |                                                      |          |          |          |          |          |          |          |                   |
| A*01:CODE <sup>d</sup>                                  | 01:CODE                |          |                                               | 1229         | 1573         | 86859          | 1309         | 4893          | 356          | 9902          | 106121         | NA                                                   | NA       | NA       | NA       | NA       | NA       | NA       | NA       | NA                |
| <b>A*02:01 total</b>                                    | <b>02:01 total</b>     |          |                                               | <b>46155</b> | <b>84012</b> | <b>3234060</b> | <b>69830</b> | <b>139179</b> | <b>13017</b> | <b>288078</b> | <b>3874331</b> | <b>C</b>                                             | <b>C</b> | <b>C</b> | <b>C</b> | <b>C</b> | <b>C</b> | <b>C</b> | <b>C</b> | <b>C</b>          |
| A*02:01                                                 | 02:01                  |          |                                               | 14           | 8            | 12092          | 197          | 120           | 4            | 604           | 13039          | WD                                                   | WD       | C        | C        | C        |          | C        | C        | C                 |
| A*02:01P                                                | 02:01P                 |          |                                               | 7            | 6            | 4316           | 11           | 19            | 0            | 15            | 4374           | WD                                                   | WD       | C        | WD       | I        |          | I        | C        | C                 |
| <b>A*02:01:01G total</b>                                | <b>02:01:01G total</b> |          |                                               | <b>46087</b> | <b>83838</b> | <b>3215327</b> | <b>69137</b> | <b>138693</b> | <b>12977</b> | <b>286747</b> | <b>3852806</b> | <b>C</b>                                             | <b>C</b> | <b>C</b> | <b>C</b> | <b>C</b> | <b>C</b> | <b>C</b> | <b>C</b> | <b>C</b>          |
| A*02:01:01G                                             | 02:01:01G              |          | 02:01:01G                                     | 41324        | 78913        | 3119230        | 68382        | 118165        | 11167        | 273798        | 3710979        | C                                                    | C        | C        | C        | C        | C        | C        | C        | C                 |
| A*02:01:01                                              | 02:01:01               |          | 02:01:01G                                     | 4731         | 4744         | 93981          | 726          | 20132         | 1797         | 12546         | 138657         | C                                                    | C        | C        | C        | C        | C        | C        | C        | C                 |
| A*02:01:01:01                                           | 02:01:01:01            | HLA00005 | 02:01:01G                                     | 2            | 0            | 925            | 0            | 103           | 0            | 264           | 1294           |                                                      |          | I        |          | C        |          | C        | I        | C                 |
| A*02:01:01:02L                                          | 02:01:01:02L           | HLA01785 | 02:01:01G                                     | 0            | 0            | 11             | 0            | 0             | 0            | 1             | 12             |                                                      |          | WD       |          |          |          |          | WD       | WD                |
| A*02:01:01:03                                           | 02:01:01:03            | HLA03253 | 02:01:01G                                     | 0            | 0            | 3              | 0            | 0             | 0            | 0             | 3              |                                                      |          |          |          |          |          |          |          |                   |
| A*02:01:01:05                                           | 02:01:01:05            | HLA13775 | 02:01:01G                                     | 6            | 2            | 445            | 4            | 104           | 6            | 49            | 616            | WD                                                   |          | I        |          | C        | WD       | I        | I        | C                 |
| A*02:01:01:06                                           | 02:01:01:06            | HLA14066 | 02:01:01G                                     | 0            | 0            | 8              | 1            | 0             | 0            | 1             | 10             |                                                      |          | WD       |          |          |          |          | WD       | WD                |
| A*02:01:01:07                                           | 02:01:01:07            | HLA15498 | 02:01:01G                                     | 0            | 0            | 1              | 0            | 0             | 0            | 0             | 1              |                                                      |          |          |          |          |          |          |          |                   |
| A*02:01:01:08                                           | 02:01:01:08            | HLA15499 | 02:01:01G                                     | 5            | 4            | 422            | 8            | 36            | 1            | 37            | 513            | WD                                                   |          | I        | WD       | I        |          | I        | I        | I                 |
| A*02:01:01:10                                           | 02:01:01:10            | HLA15762 | 02:01:01G                                     | 0            | 0            | 3              | 0            | 0             | 0            | 0             | 3              |                                                      |          |          |          |          |          |          |          |                   |
| A*02:01:01:11                                           | 02:01:01:11            | HLA16397 | 02:01:01G                                     | 7            | 0            | 3              | 0            | 0             | 0            | 5             | 15             | WD                                                   |          |          |          |          |          | WD       | WD       | WD                |
| A*02:01:01:12                                           | 02:01:01:12            | HLA16398 | 02:01:01G                                     | 0            | 0            | 0              | 0            | 0             | 0            | 1             | 1              |                                                      |          |          |          |          |          |          |          |                   |
| A*02:01:01:13                                           | 02:01:01:13            | HLA16400 | 02:01:01G                                     | 0            | 1            | 0              | 0            | 0             | 0            | 0             | 1              |                                                      |          |          |          |          |          |          |          |                   |
| A*02:01:01:14                                           | 02:01:01:14            | HLA16402 | 02:01:01G                                     | 0            | 0            | 0              | 0            | 0             | 0            | 1             | 1              |                                                      |          |          |          |          |          |          |          |                   |
| A*02:01:01:15                                           | 02:01:01:15            | HLA16413 | 02:01:01G                                     | 0            | 0            | 0              | 0            | 0             | 0            | 1             | 1              |                                                      |          |          |          |          |          |          |          |                   |
| A*02:01:01:16                                           | 02:01:01:16            | HLA16430 | 02:01:01G                                     | 0            | 0            | 2              | 0            | 0             | 0            | 0             | 2              |                                                      |          |          |          |          |          |          |          |                   |
| A*02:01:01:17                                           | 02:01:01:17            | HLA16431 | 02:01:01G                                     | 0            | 0            | 1              | 0            | 0             | 0            | 0             | 1              |                                                      |          |          |          |          |          |          |          |                   |
| A*02:01:01:18                                           | 02:01:01:18            | HLA16432 | 02:01:01G                                     | 0            | 0            | 63             | 0            | 8             | 0            | 6             | 77             |                                                      |          | WD       |          | I        |          | WD       | WD       | I                 |
| A*02:01:01:19                                           | 02:01:01:19            | HLA16654 | 02:01:01G                                     | 1            | 0            | 3              | 0            | 0             | 0            | 0             | 4              |                                                      |          |          |          |          |          |          |          |                   |
| A*02:01:01:20                                           | 02:01:01:20            | HLA16655 | 02:01:01G                                     | 0            | 0            | 3              | 0            | 0             | 0            | 1             | 4              |                                                      |          |          |          |          |          |          |          |                   |
| A*02:01:01:21                                           | 02:01:01:21            | HLA16656 | 02:01:01G                                     | 0            | 0            | 2              | 0            | 1             | 0            | 1             | 4              |                                                      |          |          |          |          |          |          |          |                   |
| A*02:01:01:22                                           | 02:01:01:22            | HLA16657 | 02:01:01G                                     | 0            | 0            | 10             | 0            | 0             | 0            | 1             | 11             |                                                      |          | WD       |          |          |          |          | WD       | WD                |
| A*02:01:01:23                                           | 02:01:01:23            | HLA16658 | 02:01:01G                                     | 0            | 0            | 0              | 1            | 0             | 0            | 0             | 1              |                                                      |          |          |          |          |          |          |          |                   |
| A*02:01:08                                              | 02:01:08               | HLA01664 | 02:01:01G                                     | 1            | 6            | 1              | 0            | 0             | 0            | 1             | 9              |                                                      | WD       |          |          |          |          |          | WD       | WD                |



| Supplemental Table 8: HLA-A Allele Summary <sup>a</sup> |                |          | Allele Count by Population Group <sup>b</sup> |     |     |      |      |     |     |     |       |     | 3.0.0 CIWD Category by Population Group <sup>c</sup> |      |      |     |     |     |       |                   |  |
|---------------------------------------------------------|----------------|----------|-----------------------------------------------|-----|-----|------|------|-----|-----|-----|-------|-----|------------------------------------------------------|------|------|-----|-----|-----|-------|-------------------|--|
| Allele                                                  | Genomic Typing | AlleleID | G group                                       | AFA | API | EURO | MENA | HIS | NAM | UNK | Total | AFA | API                                                  | EURO | MENA | HIS | NAM | UNK | Total | Highest Frequency |  |
| A*02:01:11                                              | 02:01:11       | HLA02000 | 02:01:01G                                     | 0   | 0   | 0    | 1    | 0   | 0   | 0   | 1     |     |                                                      |      |      |     |     |     |       |                   |  |
| A*02:01:14Q                                             | 02:01:14Q      | HLA02908 | 02:01:01G                                     | 1   | 0   | 22   | 0    | 3   | 1   | 4   | 31    |     |                                                      | WD   |      |     |     |     | WD    | WD                |  |
| A*02:01:15                                              | 02:01:15       | HLA02914 | 02:01:01G                                     | 0   | 0   | 1    | 0    | 7   | 0   | 1   | 9     |     |                                                      |      |      | WD  |     |     | WD    | WD                |  |
| A*02:01:21                                              | 02:01:21       | HLA03524 | 02:01:01G                                     | 0   | 0   | 3    | 0    | 0   | 0   | 0   | 3     |     |                                                      |      |      |     |     |     |       |                   |  |
| A*02:01:79                                              | 02:01:79       | HLA08056 | 02:01:01G                                     | 0   | 1   | 0    | 0    | 0   | 0   | 0   | 1     |     |                                                      |      |      |     |     |     |       |                   |  |
| A*02:01:89                                              | 02:01:89       | HLA09686 | 02:01:01G                                     | 0   | 0   | 0    | 0    | 0   | 1   | 0   | 1     |     |                                                      |      |      |     |     |     |       |                   |  |
| A*02:01:130                                             | 02:01:130      | HLA16647 | 02:01:01G                                     | 0   | 0   | 2    | 0    | 0   | 0   | 0   | 2     |     |                                                      |      |      |     |     |     |       |                   |  |
| A*02:09                                                 | 02:09          | HLA00014 | 02:01:01G                                     | 5   | 166 | 97   | 13   | 49  | 2   | 14  | 346   | WD  | C                                                    | WD   | WD   | I   |     | I   | I     | C                 |  |
| A*02:66                                                 | 02:66          | HLA01781 | 02:01:01G                                     | 2   | 0   | 65   | 0    | 4   | 0   | 5   | 76    |     |                                                      | WD   |      |     |     | WD  | WD    | WD                |  |
| A*02:83N                                                | 02:83N         | HLA02202 | 02:01:01G                                     | 0   | 0   | 5    | 0    | 0   | 0   | 3   | 8     |     |                                                      | WD   |      |     |     |     | WD    | WD                |  |
| A*02:97:01                                              | 02:97:01       | HLA02509 | 02:01:01G                                     | 0   | 0   | 2    | 0    | 0   | 0   | 1   | 3     |     |                                                      |      |      |     |     |     |       |                   |  |
| A*02:140                                                | 02:140         | HLA03241 | 02:01:01G                                     | 0   | 0   | 3    | 0    | 0   | 0   | 0   | 3     |     |                                                      |      |      |     |     |     |       |                   |  |
| A*02:241                                                | 02:241         | HLA04890 | 02:01:01G                                     | 0   | 0   | 5    | 0    | 1   | 0   | 1   | 7     |     |                                                      | WD   |      |     |     |     | WD    | WD                |  |
| A*02:294                                                | 02:294         | HLA06081 | 02:01:01G                                     | 0   | 0   | 0    | 0    | 1   | 0   | 1   | 2     |     |                                                      |      |      |     |     |     |       |                   |  |
| A*02:327                                                | 02:327         | HLA07104 | 02:01:01G                                     | 0   | 0   | 2    | 0    | 0   | 0   | 0   | 2     |     |                                                      |      |      |     |     |     |       |                   |  |
| A*02:397                                                | 02:397         | HLA08896 | 02:01:01G                                     | 0   | 0   | 0    | 0    | 3   | 0   | 1   | 4     |     |                                                      |      |      |     |     |     |       |                   |  |
| A*02:481                                                | 02:481         | HLA10909 | 02:01:01G                                     | 1   | 0   | 0    | 0    | 10  | 0   | 1   | 12    |     |                                                      |      |      | I   |     |     | WD    | I                 |  |
| A*02:538                                                | 02:538         | HLA12179 | 02:01:01G                                     | 0   | 0   | 0    | 1    | 0   | 0   | 0   | 1     |     |                                                      |      |      |     |     |     |       |                   |  |
| A*02:629                                                | 02:629         | HLA14950 | 02:01:01G                                     | 1   | 0   | 2    | 0    | 0   | 0   | 0   | 3     |     |                                                      |      |      |     |     |     |       |                   |  |
| A*02:642                                                | 02:642         | HLA15568 | 02:01:01G                                     | 0   | 1   | 0    | 0    | 66  | 2   | 1   | 70    |     |                                                      |      |      | I   |     |     | WD    | I                 |  |
| A*02:665                                                | 02:665         | HLA16406 | 02:01:01G                                     | 0   | 0   | 1    | 0    | 0   | 0   | 0   | 1     |     |                                                      |      |      |     |     |     |       |                   |  |
| A*02:01:02                                              | 02:01:02       | HLA00006 |                                               | 8   | 48  | 132  | 14   | 8   | 0   | 21  | 231   | WD  | I                                                    | I    | WD   | I   |     | I   | I     | I                 |  |
| A*02:01:03                                              | 02:01:03       | HLA00966 |                                               | 0   | 0   | 1    | 0    | 0   | 0   | 0   | 1     |     |                                                      |      |      |     |     |     |       |                   |  |
| A*02:01:04                                              | 02:01:04       | HLA01032 |                                               | 30  | 100 | 790  | 392  | 280 | 33  | 413 | 2038  | WD  | I                                                    | I    | C    | C   | C   | C   | C     | C                 |  |
| A*02:01:05                                              | 02:01:05       | HLA01327 |                                               | 1   | 4   | 428  | 25   | 21  | 0   | 204 | 683   |     |                                                      | I    | WD   | I   |     | C   | I     | C                 |  |
| A*02:01:09                                              | 02:01:09       | HLA01682 |                                               | 1   | 1   | 252  | 11   | 4   | 0   | 17  | 286   |     |                                                      | I    | WD   |     |     | I   | I     | I                 |  |
| A*02:01:12                                              | 02:01:12       | HLA02312 |                                               | 0   | 0   | 12   | 0    | 0   | 0   | 0   | 12    |     |                                                      | WD   |      |     |     |     | WD    | WD                |  |
| A*02:01:13                                              | 02:01:13       | HLA02854 |                                               | 0   | 0   | 2    | 0    | 0   | 0   | 0   | 2     |     |                                                      |      |      |     |     |     |       |                   |  |
| A*02:01:18                                              | 02:01:18       | HLA03199 |                                               | 0   | 0   | 76   | 9    | 3   | 0   | 5   | 93    |     |                                                      | WD   | WD   |     |     | WD  | WD    | WD                |  |
| A*02:01:19                                              | 02:01:19       | HLA03218 |                                               | 0   | 0   | 1    | 0    | 0   | 0   | 1   | 2     |     |                                                      |      |      |     |     |     |       |                   |  |

| Supplemental Table 8: HLA-A Allele Summary <sup>a</sup> |                |          | Allele Count by Population Group <sup>b</sup> |     |     |      |      |     |     |     |       | 3.0.0 CIWD Category by Population Group <sup>c</sup> |     |      |      |     |     |     |       |                   |
|---------------------------------------------------------|----------------|----------|-----------------------------------------------|-----|-----|------|------|-----|-----|-----|-------|------------------------------------------------------|-----|------|------|-----|-----|-----|-------|-------------------|
| Allele                                                  | Genomic Typing | AlleleID | G group                                       | AFA | API | EURO | MENA | HIS | NAM | UNK | Total | AFA                                                  | API | EURO | MENA | HIS | NAM | UNK | Total | Highest Frequency |
| A*02:01:22                                              | 02:01:22       | HLA03534 |                                               | 0   | 0   | 52   | 21   | 0   | 0   | 6   | 79    |                                                      |     | WD   | WD   |     |     | WD  | WD    | WD                |
| A*02:01:23                                              | 02:01:23       | HLA03787 |                                               | 0   | 0   | 118  | 3    | 0   | 0   | 0   | 121   |                                                      |     | WD   |      |     |     |     | WD    | WD                |
| A*02:01:24                                              | 02:01:24       | HLA03790 |                                               | 0   | 0   | 16   | 0    | 2   | 0   | 0   | 18    |                                                      |     | WD   |      |     |     |     | WD    | WD                |
| A*02:01:25                                              | 02:01:25       | HLA03792 |                                               | 0   | 0   | 10   | 0    | 0   | 0   | 0   | 10    |                                                      |     | WD   |      |     |     |     | WD    | WD                |
| A*02:01:26                                              | 02:01:26       | HLA03794 |                                               | 0   | 0   | 19   | 0    | 0   | 2   | 1   | 22    |                                                      |     | WD   |      |     |     |     | WD    | WD                |
| A*02:01:27                                              | 02:01:27       | HLA03798 |                                               | 0   | 0   | 18   | 0    | 0   | 0   | 0   | 18    |                                                      |     | WD   |      |     |     |     | WD    | WD                |
| A*02:01:28                                              | 02:01:28       | HLA03883 |                                               | 0   | 0   | 1    | 0    | 0   | 0   | 0   | 1     |                                                      |     |      |      |     |     |     |       |                   |
| A*02:01:29                                              | 02:01:29       | HLA03887 |                                               | 0   | 0   | 19   | 0    | 0   | 0   | 1   | 20    |                                                      |     | WD   |      |     |     |     | WD    | WD                |
| A*02:01:30                                              | 02:01:30       | HLA03889 |                                               | 1   | 0   | 28   | 0    | 2   | 0   | 1   | 32    |                                                      |     | WD   |      |     |     |     | WD    | WD                |
| A*02:01:31                                              | 02:01:31       | HLA03897 |                                               | 5   | 0   | 36   | 0    | 0   | 0   | 12  | 53    | WD                                                   |     | WD   |      |     |     | WD  | WD    | WD                |
| A*02:01:32                                              | 02:01:32       | HLA03943 |                                               | 0   | 0   | 17   | 0    | 0   | 0   | 0   | 17    |                                                      |     | WD   |      |     |     |     | WD    | WD                |
| A*02:01:33                                              | 02:01:33       | HLA04421 |                                               | 0   | 0   | 3    | 0    | 0   | 0   | 0   | 3     |                                                      |     |      |      |     |     |     |       |                   |
| A*02:01:34                                              | 02:01:34       | HLA04426 |                                               | 0   | 1   | 84   | 1    | 0   | 0   | 0   | 86    |                                                      |     | WD   |      |     |     |     | WD    | WD                |
| A*02:01:35                                              | 02:01:35       | HLA04428 |                                               | 1   | 0   | 3    | 0    | 1   | 0   | 0   | 5     |                                                      |     |      |      |     |     |     | WD    | WD                |
| A*02:01:36                                              | 02:01:36       | HLA04431 |                                               | 0   | 0   | 3    | 1    | 0   | 0   | 0   | 4     |                                                      |     |      |      |     |     |     |       |                   |
| A*02:01:37                                              | 02:01:37       | HLA04477 |                                               | 0   | 0   | 34   | 3    | 1   | 1   | 0   | 39    |                                                      |     | WD   |      |     |     |     | WD    | WD                |
| A*02:01:38                                              | 02:01:38       | HLA04479 |                                               | 0   | 0   | 21   | 0    | 1   | 0   | 4   | 26    |                                                      |     | WD   |      |     |     |     | WD    | WD                |
| A*02:01:39                                              | 02:01:39       | HLA04480 |                                               | 0   | 0   | 5    | 0    | 1   | 0   | 4   | 10    |                                                      |     | WD   |      |     |     |     | WD    | WD                |
| A*02:01:40                                              | 02:01:40       | HLA04482 |                                               | 0   | 1   | 0    | 0    | 0   | 0   | 0   | 1     |                                                      |     |      |      |     |     |     |       |                   |
| A*02:01:41                                              | 02:01:41       | HLA04484 |                                               | 0   | 0   | 13   | 0    | 0   | 0   | 1   | 14    |                                                      |     | WD   |      |     |     |     | WD    | WD                |
| A*02:01:42                                              | 02:01:42       | HLA04557 |                                               | 0   | 0   | 5    | 0    | 0   | 0   | 0   | 5     |                                                      |     | WD   |      |     |     |     | WD    | WD                |
| A*02:01:43                                              | 02:01:43       | HLA04674 |                                               | 0   | 1   | 12   | 0    | 0   | 0   | 2   | 15    |                                                      |     | WD   |      |     |     |     | WD    | WD                |
| A*02:01:45                                              | 02:01:45       | HLA04814 |                                               | 0   | 0   | 3    | 0    | 0   | 0   | 0   | 3     |                                                      |     |      |      |     |     |     |       |                   |
| A*02:01:46                                              | 02:01:46       | HLA05140 |                                               | 0   | 0   | 5    | 0    | 1   | 0   | 1   | 7     |                                                      |     | WD   |      |     |     |     | WD    | WD                |
| A*02:01:49                                              | 02:01:49       | HLA05243 |                                               | 0   | 0   | 12   | 0    | 0   | 0   | 0   | 12    |                                                      |     | WD   |      |     |     |     | WD    | WD                |
| A*02:01:51                                              | 02:01:51       | HLA05654 |                                               | 0   | 0   | 1    | 0    | 0   | 0   | 0   | 1     |                                                      |     |      |      |     |     |     |       |                   |
| A*02:01:52                                              | 02:01:52       | HLA05668 |                                               | 0   | 0   | 18   | 0    | 1   | 0   | 1   | 20    |                                                      |     | WD   |      |     |     |     | WD    | WD                |
| A*02:01:53                                              | 02:01:53       | HLA05693 |                                               | 0   | 0   | 2    | 0    | 0   | 0   | 0   | 2     |                                                      |     |      |      |     |     |     |       |                   |
| A*02:01:54                                              | 02:01:54       | HLA05698 |                                               | 0   | 0   | 2    | 0    | 10  | 0   | 5   | 17    |                                                      |     |      |      | I   |     | WD  | WD    | I                 |
| A*02:01:55                                              | 02:01:55       | HLA06090 |                                               | 0   | 0   | 3    | 0    | 0   | 0   | 0   | 3     |                                                      |     |      |      |     |     |     |       |                   |

| Supplemental Table 8: HLA-A Allele Summary <sup>a</sup> |                |          | Allele Count by Population Group <sup>b</sup> |     |     |      |      |     |     |     |       | 3.0.0 CIWD Category by Population Group <sup>c</sup> |     |      |      |     |     |     |       |                   |  |
|---------------------------------------------------------|----------------|----------|-----------------------------------------------|-----|-----|------|------|-----|-----|-----|-------|------------------------------------------------------|-----|------|------|-----|-----|-----|-------|-------------------|--|
| Allele                                                  | Genomic Typing | AlleleID | G group                                       | AFA | API | EURO | MENA | HIS | NAM | UNK | Total | AFA                                                  | API | EURO | MENA | HIS | NAM | UNK | Total | Highest Frequency |  |
| A*02:01:57                                              | 02:01:57       | HLA06567 |                                               | 0   | 0   | 2    | 0    | 0   | 0   | 0   | 2     |                                                      |     |      |      |     |     |     |       |                   |  |
| A*02:01:58                                              | 02:01:58       | HLA06573 |                                               | 0   | 0   | 3    | 0    | 0   | 0   | 0   | 3     |                                                      |     |      |      |     |     |     |       |                   |  |
| A*02:01:59                                              | 02:01:59       | HLA06657 |                                               | 0   | 0   | 3    | 0    | 0   | 0   | 0   | 3     |                                                      |     |      |      |     |     |     |       |                   |  |
| A*02:01:60                                              | 02:01:60       | HLA06661 |                                               | 0   | 0   | 3    | 0    | 0   | 0   | 0   | 3     |                                                      |     |      |      |     |     |     |       |                   |  |
| A*02:01:61                                              | 02:01:61       | HLA06768 |                                               | 0   | 0   | 1    | 0    | 0   | 0   | 3   | 4     |                                                      |     |      |      |     |     |     |       |                   |  |
| A*02:01:62                                              | 02:01:62       | HLA06779 |                                               | 0   | 0   | 0    | 1    | 0   | 0   | 1   | 2     |                                                      |     |      |      |     |     |     |       |                   |  |
| A*02:01:64                                              | 02:01:64       | HLA07283 |                                               | 0   | 0   | 3    | 0    | 0   | 0   | 0   | 3     |                                                      |     |      |      |     |     |     |       |                   |  |
| A*02:01:65                                              | 02:01:65       | HLA07436 |                                               | 0   | 1   | 4    | 0    | 0   | 0   | 0   | 5     |                                                      |     |      |      |     |     |     | WD    | WD                |  |
| A*02:01:66                                              | 02:01:66       | HLA07438 |                                               | 0   | 0   | 2    | 0    | 0   | 0   | 0   | 2     |                                                      |     |      |      |     |     |     |       |                   |  |
| A*02:01:69                                              | 02:01:69       | HLA07616 |                                               | 0   | 0   | 3    | 0    | 0   | 0   | 0   | 3     |                                                      |     |      |      |     |     |     |       |                   |  |
| A*02:01:70                                              | 02:01:70       | HLA07617 |                                               | 0   | 0   | 1    | 0    | 0   | 0   | 0   | 1     |                                                      |     |      |      |     |     |     |       |                   |  |
| A*02:01:71                                              | 02:01:71       | HLA07620 |                                               | 0   | 0   | 9    | 0    | 0   | 0   | 0   | 9     |                                                      |     | WD   |      |     |     |     | WD    | WD                |  |
| A*02:01:72                                              | 02:01:72       | HLA07753 |                                               | 0   | 0   | 1    | 0    | 0   | 0   | 0   | 1     |                                                      |     |      |      |     |     |     |       |                   |  |
| A*02:01:74                                              | 02:01:74       | HLA08006 |                                               | 0   | 0   | 5    | 0    | 0   | 0   | 0   | 5     |                                                      |     | WD   |      |     |     |     | WD    | WD                |  |
| A*02:01:75                                              | 02:01:75       | HLA08008 |                                               | 0   | 0   | 1    | 0    | 0   | 0   | 0   | 1     |                                                      |     |      |      |     |     |     |       |                   |  |
| A*02:01:76                                              | 02:01:76       | HLA08014 |                                               | 0   | 0   | 4    | 0    | 0   | 0   | 0   | 4     |                                                      |     |      |      |     |     |     |       |                   |  |
| A*02:01:77                                              | 02:01:77       | HLA08015 |                                               | 0   | 0   | 1    | 0    | 0   | 0   | 0   | 1     |                                                      |     |      |      |     |     |     |       |                   |  |
| A*02:01:83                                              | 02:01:83       | HLA08465 |                                               | 0   | 0   | 1    | 0    | 0   | 0   | 1   | 2     |                                                      |     |      |      |     |     |     |       |                   |  |
| A*02:01:84                                              | 02:01:84       | HLA08497 |                                               | 0   | 0   | 1    | 0    | 0   | 0   | 0   | 1     |                                                      |     |      |      |     |     |     |       |                   |  |
| A*02:01:86                                              | 02:01:86       | HLA08652 |                                               | 0   | 0   | 5    | 0    | 0   | 0   | 1   | 6     |                                                      |     | WD   |      |     |     |     | WD    | WD                |  |
| A*02:01:87                                              | 02:01:87       | HLA09549 |                                               | 0   | 1   | 1    | 0    | 1   | 0   | 0   | 3     |                                                      |     |      |      |     |     |     |       |                   |  |
| A*02:01:88                                              | 02:01:88       | HLA09552 |                                               | 0   | 0   | 0    | 0    | 2   | 0   | 2   | 4     |                                                      |     |      |      |     |     |     |       |                   |  |
| A*02:01:90                                              | 02:01:90       | HLA09810 |                                               | 0   | 0   | 1    | 0    | 5   | 0   | 1   | 7     |                                                      |     |      |      | WD  |     |     | WD    | WD                |  |
| A*02:01:92                                              | 02:01:92       | HLA09813 |                                               | 0   | 0   | 1    | 0    | 0   | 0   | 0   | 1     |                                                      |     |      |      |     |     |     |       |                   |  |
| A*02:01:93                                              | 02:01:93       | HLA09814 |                                               | 0   | 0   | 3    | 1    | 0   | 0   | 0   | 4     |                                                      |     |      |      |     |     |     |       |                   |  |
| A*02:01:94                                              | 02:01:94       | HLA09816 |                                               | 0   | 0   | 1    | 0    | 0   | 0   | 0   | 1     |                                                      |     |      |      |     |     |     |       |                   |  |
| A*02:01:100                                             | 02:01:100      | HLA10396 |                                               | 0   | 0   | 2    | 0    | 0   | 0   | 0   | 2     |                                                      |     |      |      |     |     |     |       |                   |  |
| A*02:01:101                                             | 02:01:101      | HLA10778 |                                               | 0   | 0   | 0    | 0    | 0   | 0   | 1   | 1     |                                                      |     |      |      |     |     |     |       |                   |  |
| A*02:01:102                                             | 02:01:102      | HLA10780 |                                               | 0   | 0   | 0    | 0    | 0   | 0   | 1   | 1     |                                                      |     |      |      |     |     |     |       |                   |  |
| A*02:01:103                                             | 02:01:103      | HLA10782 |                                               | 0   | 1   | 0    | 0    | 0   | 0   | 0   | 1     |                                                      |     |      |      |     |     |     |       |                   |  |

| Supplemental Table 8: HLA-A Allele Summary <sup>a</sup> |                        |          | Allele Count by Population Group <sup>b</sup> |              |              |             |             |             |            |             |              | 3.0.0 CIWD Category by Population Group <sup>c</sup> |          |          |          |          |          |          |          |                   |          |
|---------------------------------------------------------|------------------------|----------|-----------------------------------------------|--------------|--------------|-------------|-------------|-------------|------------|-------------|--------------|------------------------------------------------------|----------|----------|----------|----------|----------|----------|----------|-------------------|----------|
| Allele                                                  | Genomic Typing         | AlleleID | G group                                       | AFA          | API          | EURO        | MENA        | HIS         | NAM        | UNK         | Total        | AFA                                                  | API      | EURO     | MENA     | HIS      | NAM      | UNK      | Total    | Highest Frequency |          |
| A*02:01:108                                             | 02:01:108              | HLA11996 |                                               | 0            | 0            | 0           | 0           | 0           | 0          | 1           | 1            |                                                      |          |          |          |          |          |          |          |                   |          |
| A*02:01:111                                             | 02:01:111              | HLA12117 |                                               | 0            | 0            | 2           | 0           | 0           | 0          | 0           | 2            |                                                      |          |          |          |          |          |          |          |                   |          |
| A*02:01:112                                             | 02:01:112              | HLA12121 |                                               | 0            | 0            | 2           | 0           | 0           | 0          | 0           | 2            |                                                      |          |          |          |          |          |          |          |                   |          |
| A*02:01:113                                             | 02:01:113              | HLA12255 |                                               | 0            | 0            | 2           | 0           | 0           | 0          | 0           | 2            |                                                      |          |          |          |          |          |          |          |                   |          |
| A*02:01:114                                             | 02:01:114              | HLA12256 |                                               | 0            | 0            | 1           | 0           | 1           | 0          | 0           | 2            |                                                      |          |          |          |          |          |          |          |                   |          |
| A*02:01:115                                             | 02:01:115              | HLA12259 |                                               | 0            | 0            | 0           | 0           | 1           | 0          | 0           | 1            |                                                      |          |          |          |          |          |          |          |                   |          |
| A*02:01:116                                             | 02:01:116              | HLA13081 |                                               | 0            | 0            | 3           | 0           | 0           | 0          | 2           | 5            |                                                      |          |          |          |          |          |          | WD       | WD                |          |
| A*02:01:119                                             | 02:01:119              | HLA13319 |                                               | 0            | 0            | 0           | 0           | 1           | 0          | 0           | 1            |                                                      |          |          |          |          |          |          |          |                   |          |
| A*02:01:120                                             | 02:01:120              | HLA13462 |                                               | 0            | 0            | 0           | 3           | 0           | 0          | 1           | 4            |                                                      |          |          |          |          |          |          |          |                   |          |
| A*02:01:121                                             | 02:01:121              | HLA14225 |                                               | 0            | 1            | 0           | 0           | 0           | 0          | 0           | 1            |                                                      |          |          |          |          |          |          |          |                   |          |
| A*02:01:126                                             | 02:01:126              | HLA15853 |                                               | 0            | 0            | 1           | 0           | 0           | 0          | 0           | 1            |                                                      |          |          |          |          |          |          |          |                   |          |
| <b>A*02:02 total</b>                                    | <b>02:02 total</b>     |          |                                               | <b>15622</b> | <b>322</b>   | <b>9230</b> | <b>2193</b> | <b>4335</b> | <b>685</b> | <b>6070</b> | <b>38457</b> | <b>C</b>                                             | <b>C</b> | <b>C</b> | <b>C</b> | <b>C</b> | <b>C</b> | <b>C</b> | <b>C</b> | <b>C</b>          | <b>C</b> |
| A*02:02                                                 | 02:02                  |          |                                               | 8893         | 136          | 5051        | 898         | 2263        | 402        | 3108        | 20751        | C                                                    | C        | C        | C        | C        | C        | C        | C        | C                 | C        |
| A*02:02P                                                | 02:02P                 |          |                                               | 0            | 0            | 10          | 0           | 2           | 0          | 0           | 12           |                                                      |          | WD       |          |          |          |          | WD       | WD                |          |
| <b>A*02:02:01G total</b>                                | <b>02:02:01G total</b> |          |                                               | <b>6729</b>  | <b>186</b>   | <b>4169</b> | <b>1295</b> | <b>2069</b> | <b>283</b> | <b>2962</b> | <b>17693</b> | <b>C</b>                                             | <b>C</b> | <b>C</b> | <b>C</b> | <b>C</b> | <b>C</b> | <b>C</b> | <b>C</b> | <b>C</b>          | <b>C</b> |
| A*02:02:01G                                             | 02:02:01G              |          | 02:02:01G                                     | 1296         | 114          | 2160        | 224         | 390         | 2          | 836         | 5022         | C                                                    | I        | C        | C        | C        |          | C        | C        | C                 | C        |
| A*02:02:01                                              | 02:02:01               |          | 02:02:01G                                     | 4156         | 67           | 1763        | 1035        | 1258        | 208        | 1787        | 10274        | C                                                    | I        | C        | C        | C        | C        | C        | C        | C                 | C        |
| A*02:02:01:01                                           | 02:02:01:01            | HLA00007 | 02:02:01G                                     | 891          | 5            | 200         | 29          | 293         | 60         | 244         | 1722         | C                                                    | WD       | I        | WD       | C        | C        | C        | C        | C                 | C        |
| A*02:02:01:02                                           | 02:02:01:02            | HLA13987 | 02:02:01G                                     | 386          | 0            | 46          | 7           | 128         | 13         | 95          | 675          | C                                                    |          | WD       | WD       | C        | C        | I        | I        | C                 | C        |
| A*02:02:03                                              | 02:02:03               | HLA13091 |                                               | 0            | 0            | 0           | 0           | 1           | 0          | 0           | 1            |                                                      |          |          |          |          |          |          |          |                   |          |
| <b>A*02:03 total</b>                                    | <b>02:03 total</b>     |          |                                               | <b>78</b>    | <b>25743</b> | <b>499</b>  | <b>119</b>  | <b>80</b>   | <b>45</b>  | <b>1512</b> | <b>28076</b> | <b>C</b>                                             | <b>C</b> | <b>I</b> | <b>C</b> | <b>C</b> | <b>C</b> | <b>C</b> | <b>C</b> | <b>C</b>          | <b>C</b> |
| A*02:03                                                 | 02:03                  |          |                                               | 2            | 14           | 5           | 0           | 0           | 0          | 2           | 23           |                                                      | I        | WD       |          |          |          |          | WD       | I                 |          |
| A*02:03P                                                | 02:03P                 |          |                                               | 0            | 1            | 1           | 0           | 0           | 0          | 0           | 2            |                                                      |          |          |          |          |          |          |          |                   |          |
| <b>A*02:03:01G total</b>                                | <b>02:03:01G total</b> |          |                                               | <b>76</b>    | <b>25700</b> | <b>493</b>  | <b>119</b>  | <b>80</b>   | <b>45</b>  | <b>1509</b> | <b>28022</b> | <b>C</b>                                             | <b>C</b> | <b>I</b> | <b>C</b> | <b>C</b> | <b>C</b> | <b>C</b> | <b>C</b> | <b>C</b>          | <b>C</b> |
| A*02:03:01G                                             | 02:03:01G              |          | 02:03:01G                                     | 66           | 21039        | 474         | 109         | 59          | 33         | 1077        | 22857        | C                                                    | C        | I        | C        | I        | C        | C        | C        | C                 | C        |
| A*02:03:01                                              | 02:03:01               | HLA00008 | 02:03:01G                                     | 10           | 4660         | 19          | 10          | 21          | 12         | 432         | 5164         | WD                                                   | C        | WD       | WD       | I        | C        | C        | C        | C                 | C        |
| A*02:264                                                | 02:264                 | HLA05420 | 02:03:01G                                     | 0            | 1            | 0           | 0           | 0           | 0          | 0           | 1            |                                                      |          |          |          |          |          |          |          |                   |          |
| A*02:03:02                                              | 02:03:02               | HLA01945 |                                               | 0            | 26           | 0           | 0           | 0           | 0          | 1           | 27           |                                                      | I        |          |          |          |          |          | WD       | I                 |          |
| A*02:03:03                                              | 02:03:03               | HLA05409 |                                               | 0            | 1            | 0           | 0           | 0           | 0          | 0           | 1            |                                                      |          |          |          |          |          |          |          |                   |          |
| A*02:03:04                                              | 02:03:04               | HLA06091 |                                               | 0            | 1            | 0           | 0           | 0           | 0          | 0           | 1            |                                                      |          |          |          |          |          |          |          |                   |          |

| Supplemental Table 8: HLA-A Allele Summary <sup>a</sup> |                        |          | Allele Count by Population Group <sup>b</sup> |             |              |              |              |              |             |              |               | 3.0.0 CIWD Category by Population Group <sup>c</sup> |           |          |           |          |          |          |          |                   |
|---------------------------------------------------------|------------------------|----------|-----------------------------------------------|-------------|--------------|--------------|--------------|--------------|-------------|--------------|---------------|------------------------------------------------------|-----------|----------|-----------|----------|----------|----------|----------|-------------------|
| Allele                                                  | Genomic Typing         | AlleleID | G group                                       | AFA         | API          | EURO         | MENA         | HIS          | NAM         | UNK          | Total         | AFA                                                  | API       | EURO     | MENA      | HIS      | NAM      | UNK      | Total    | Highest Frequency |
| <b>A*02:04 total</b>                                    | <b>02:04 total</b>     |          |                                               | <b>141</b>  | <b>11</b>    | <b>305</b>   | <b>6</b>     | <b>1690</b>  | <b>370</b>  | <b>483</b>   | <b>3006</b>   | <b>C</b>                                             | <b>WD</b> | <b>I</b> | <b>WD</b> | <b>C</b> | <b>C</b> | <b>C</b> | <b>C</b> | <b>C</b>          |
| <b>A*02:04:01G total</b>                                | <b>02:04:01G total</b> |          |                                               | <b>141</b>  | <b>11</b>    | <b>305</b>   | <b>6</b>     | <b>1690</b>  | <b>370</b>  | <b>483</b>   | <b>3006</b>   | <b>C</b>                                             | <b>WD</b> | <b>I</b> | <b>WD</b> | <b>C</b> | <b>C</b> | <b>C</b> | <b>C</b> | <b>C</b>          |
| A*02:04                                                 | 02:04                  | HLA00009 | 02:04:01G                                     | 137         | 11           | 276          | 6            | 1638         | 370         | 423          | 2861          | C                                                    | WD        | I        | WD        | C        | C        | C        | C        | C                 |
| A*02:04:01G                                             | 02:04:01G              |          | 02:04:01G                                     | 4           | 0            | 29           | 0            | 52           | 0           | 58           | 143           |                                                      |           | WD       |           | I        |          | I        | WD       | I                 |
| A*02:664                                                | 02:664                 | HLA16399 | 02:04:01G                                     | 0           | 0            | 0            | 0            | 0            | 0           | 2            | 2             |                                                      |           |          |           |          |          |          |          |                   |
| <b>A*02:05 total</b>                                    | <b>02:05 total</b>     |          |                                               | <b>6312</b> | <b>6944</b>  | <b>89735</b> | <b>10216</b> | <b>9237</b>  | <b>921</b>  | <b>17916</b> | <b>141281</b> | <b>C</b>                                             | <b>C</b>  | <b>C</b> | <b>C</b>  | <b>C</b> | <b>C</b> | <b>C</b> | <b>C</b> | <b>C</b>          |
| A*02:05                                                 | 02:05                  |          |                                               | 1           | 0            | 866          | 14           | 1            | 0           | 98           | 980           |                                                      |           | I        | WD        |          |          | I        | I        | I                 |
| A*02:05P                                                | 02:05P                 |          |                                               | 0           | 0            | 189          | 1            | 2            | 0           | 0            | 192           |                                                      |           | I        |           |          |          |          | I        | I                 |
| <b>A*02:05:01G total</b>                                | <b>02:05:01G total</b> |          |                                               | <b>6310</b> | <b>6940</b>  | <b>88591</b> | <b>10194</b> | <b>9233</b>  | <b>921</b>  | <b>17817</b> | <b>140006</b> | <b>C</b>                                             | <b>C</b>  | <b>C</b> | <b>C</b>  | <b>C</b> | <b>C</b> | <b>C</b> | <b>C</b> | <b>C</b>          |
| A*02:05:01G                                             | 02:05:01G              |          | 02:05:01G                                     | 5045        | 6349         | 83021        | 9854         | 6502         | 655         | 16551        | 127977        | C                                                    | C         | C        | C         | C        | C        | C        | C        | C                 |
| A*02:05:01                                              | 02:05:01               |          | 02:05:01G                                     | 1196        | 571          | 5262         | 327          | 2615         | 261         | 1216         | 11448         | C                                                    | C         | C        | C         | C        | C        | C        | C        | C                 |
| A*02:05:01:01                                           | 02:05:01:01            | HLA00010 | 02:05:01G                                     | 53          | 19           | 303          | 13           | 115          | 5           | 49           | 557           | C                                                    | I         | I        | WD        | C        | WD       | I        | I        | C                 |
| A*02:179                                                | 02:179                 | HLA03833 | 02:05:01G                                     | 16          | 1            | 1            | 0            | 1            | 0           | 1            | 20            | WD                                                   |           |          |           |          |          |          | WD       | WD                |
| A*02:324                                                | 02:324                 | HLA06900 | 02:05:01G                                     | 0           | 0            | 4            | 0            | 0            | 0           | 0            | 4             |                                                      |           |          |           |          |          |          |          |                   |
| A*02:05:02                                              | 02:05:02               | HLA03656 |                                               | 0           | 0            | 88           | 0            | 1            | 0           | 1            | 90            |                                                      |           | WD       |           |          |          |          | WD       | WD                |
| A*02:05:03                                              | 02:05:03               | HLA03896 |                                               | 1           | 1            | 0            | 7            | 0            | 0           | 0            | 9             |                                                      |           |          | WD        |          |          |          | WD       | WD                |
| A*02:05:05                                              | 02:05:05               | HLA06105 |                                               | 0           | 3            | 1            | 0            | 0            | 0           | 0            | 4             |                                                      |           |          |           |          |          |          |          |                   |
| <b>A*02:06 total</b>                                    | <b>02:06 total</b>     |          |                                               | <b>495</b>  | <b>31484</b> | <b>23148</b> | <b>1832</b>  | <b>23754</b> | <b>1719</b> | <b>9125</b>  | <b>91557</b>  | <b>C</b>                                             | <b>C</b>  | <b>C</b> | <b>C</b>  | <b>C</b> | <b>C</b> | <b>C</b> | <b>C</b> | <b>C</b>          |
| A*02:06                                                 | 02:06                  |          |                                               | 0           | 2            | 94           | 0            | 12           | 2           | 7            | 117           |                                                      |           | WD       |           | I        |          | WD       | WD       | I                 |
| A*02:06P                                                | 02:06P                 |          |                                               | 0           | 2            | 12           | 0            | 0            | 0           | 0            | 14            |                                                      |           | WD       |           |          |          |          | WD       | WD                |
| <b>A*02:06:01G total</b>                                | <b>02:06:01G total</b> |          |                                               | <b>495</b>  | <b>31473</b> | <b>23023</b> | <b>1832</b>  | <b>23696</b> | <b>1712</b> | <b>9101</b>  | <b>91332</b>  | <b>C</b>                                             | <b>C</b>  | <b>C</b> | <b>C</b>  | <b>C</b> | <b>C</b> | <b>C</b> | <b>C</b> | <b>C</b>          |
| A*02:06:01G                                             | 02:06:01G              |          | 02:06:01G                                     | 351         | 26770        | 21846        | 1776         | 15858        | 1231        | 7246         | 75078         | C                                                    | C         | C        | C         | C        | C        | C        | C        | C                 |
| A*02:06:01                                              | 02:06:01               |          | 02:06:01G                                     | 96          | 3231         | 730          | 36           | 5378         | 314         | 1397         | 11182         | C                                                    | C         | I        | WD        | C        | C        | C        | C        | C                 |
| A*02:06:01:01                                           | 02:06:01:01            | HLA00011 | 02:06:01G                                     | 48          | 1436         | 439          | 18           | 2460         | 167         | 449          | 5017          | C                                                    | C         | I        | WD        | C        | C        | C        | C        | C                 |
| A*02:06:01:02                                           | 02:06:01:02            | HLA13485 | 02:06:01G                                     | 0           | 9            | 0            | 0            | 0            | 0           | 0            | 9             |                                                      | WD        |          |           |          |          |          | WD       | WD                |
| A*02:06:01:03                                           | 02:06:01:03            | HLA14087 | 02:06:01G                                     | 0           | 0            | 7            | 0            | 0            | 0           | 1            | 8             |                                                      |           | WD       |           |          |          |          | WD       | WD                |
| A*02:06:01:04                                           | 02:06:01:04            | HLA17065 | 02:06:01G                                     | 0           | 27           | 1            | 2            | 0            | 0           | 8            | 38            |                                                      | I         |          |           |          |          | WD       | WD       | I                 |
| A*02:06:04                                              | 02:06:04               | HLA02919 |                                               | 0           | 0            | 0            | 0            | 1            | 0           | 0            | 1             |                                                      |           |          |           |          |          |          |          |                   |
| A*02:06:05                                              | 02:06:05               | HLA03026 |                                               | 0           | 0            | 3            | 0            | 31           | 4           | 13           | 51            |                                                      |           |          |           | I        |          | WD       | WD       | I                 |
| A*02:06:07                                              | 02:06:07               | HLA04062 |                                               | 0           | 0            | 11           | 0            | 0            | 0           | 1            | 12            |                                                      |           | WD       |           |          |          |          | WD       | WD                |

| Supplemental Table 8: HLA-A Allele Summary <sup>a</sup> |                        |          | Allele Count by Population Group <sup>b</sup> |            |              |             |             |             |            |             |              | 3.0.0 CIWD Category by Population Group <sup>c</sup> |          |           |          |          |          |          |          |                   |
|---------------------------------------------------------|------------------------|----------|-----------------------------------------------|------------|--------------|-------------|-------------|-------------|------------|-------------|--------------|------------------------------------------------------|----------|-----------|----------|----------|----------|----------|----------|-------------------|
| Allele                                                  | Genomic Typing         | AlleleID | G group                                       | AFA        | API          | EURO        | MENA        | HIS         | NAM        | UNK         | Total        | AFA                                                  | API      | EURO      | MENA     | HIS      | NAM      | UNK      | Total    | Highest Frequency |
| A*02:06:08                                              | 02:06:08               | HLA04478 |                                               | 0          | 0            | 3           | 0           | 11          | 1          | 2           | 17           |                                                      |          |           |          | I        |          |          | WD       | I                 |
| A*02:06:09                                              | 02:06:09               | HLA04550 |                                               | 0          | 0            | 0           | 0           | 2           | 0          | 0           | 2            |                                                      |          |           |          |          |          |          |          |                   |
| A*02:06:10                                              | 02:06:10               | HLA05640 |                                               | 0          | 1            | 0           | 0           | 0           | 0          | 0           | 1            |                                                      |          |           |          |          |          |          |          |                   |
| A*02:06:11                                              | 02:06:11               | HLA07608 |                                               | 0          | 5            | 0           | 0           | 0           | 0          | 0           | 5            |                                                      | WD       |           |          |          |          |          | WD       | WD                |
| A*02:06:12                                              | 02:06:12               | HLA08003 |                                               | 0          | 0            | 0           | 0           | 1           | 0          | 0           | 1            |                                                      |          |           |          |          |          |          |          |                   |
| A*02:06:17                                              | 02:06:17               | HLA12114 |                                               | 0          | 0            | 0           | 0           | 0           | 0          | 1           | 1            |                                                      |          |           |          |          |          |          |          |                   |
| A*02:06:18                                              | 02:06:18               | HLA12558 |                                               | 0          | 0            | 1           | 0           | 0           | 0          | 0           | 1            |                                                      |          |           |          |          |          |          |          |                   |
| A*02:06:20                                              | 02:06:20               | HLA13456 |                                               | 0          | 1            | 0           | 0           | 0           | 0          | 0           | 1            |                                                      |          |           |          |          |          |          |          |                   |
| A*02:06:22                                              | 02:06:22               | HLA14393 |                                               | 0          | 0            | 1           | 0           | 0           | 0          | 0           | 1            |                                                      |          |           |          |          |          |          |          |                   |
| <b>A*02:07 total</b>                                    | <b>02:07 total</b>     |          |                                               | <b>37</b>  | <b>23911</b> | <b>2363</b> | <b>485</b>  | <b>114</b>  | <b>9</b>   | <b>2523</b> | <b>29442</b> | <b>WD</b>                                            | <b>C</b> | <b>C</b>  | <b>C</b> | <b>C</b> | <b>C</b> | <b>C</b> | <b>C</b> | <b>C</b>          |
| A*02:07                                                 | 02:07                  |          |                                               | 0          | 62           | 14          | 0           | 0           | 0          | 19          | 95           |                                                      | I        | WD        |          |          |          | I        | WD       | I                 |
| A*02:07P                                                | 02:07P                 |          |                                               | 0          | 0            | 8           | 0           | 0           | 0          | 0           | 8            |                                                      |          | WD        |          |          |          |          | WD       | WD                |
| <b>A*02:07:01G total</b>                                | <b>02:07:01G total</b> |          |                                               | <b>37</b>  | <b>23849</b> | <b>2341</b> | <b>485</b>  | <b>114</b>  | <b>9</b>   | <b>2504</b> | <b>29339</b> | <b>WD</b>                                            | <b>C</b> | <b>C</b>  | <b>C</b> | <b>C</b> | <b>C</b> | <b>C</b> | <b>C</b> | <b>C</b>          |
| A*02:07:01G                                             | 02:07:01G              |          | 02:07:01G                                     | 27         | 18473        | 2294        | 473         | 86          | 6          | 1793        | 23152        | WD                                                   | C        | C         | C        | C        | WD       | C        | C        | C                 |
| A*02:07:01                                              | 02:07:01               | HLA00012 | 02:07:01G                                     | 10         | 5375         | 47          | 12          | 28          | 3          | 711         | 6186         | WD                                                   | C        | WD        | WD       | I        |          | C        | C        | C                 |
| A*02:07:02                                              | 02:07:02               | HLA07326 | 02:07:01G                                     | 0          | 1            | 0           | 0           | 0           | 0          | 0           | 1            |                                                      |          |           |          |          |          |          |          |                   |
| A*02:08                                                 | 02:08                  | HLA00013 |                                               | 7          | 278          | 1560        | 203         | 12          | 1          | 87          | 2148         | WD                                                   | C        | C         | C        | I        |          | I        | C        | C                 |
| <b>A*02:10 total</b>                                    | <b>02:10 total</b>     |          |                                               | <b>1</b>   | <b>350</b>   | <b>8</b>    | <b>1</b>    | <b>0</b>    | <b>0</b>   | <b>57</b>   | <b>417</b>   |                                                      | <b>C</b> | <b>WD</b> |          |          |          | <b>I</b> | <b>I</b> | <b>C</b>          |
| <b>A*02:10:01G total</b>                                | <b>02:10:01G total</b> |          |                                               | <b>1</b>   | <b>350</b>   | <b>8</b>    | <b>1</b>    | <b>0</b>    | <b>0</b>   | <b>57</b>   | <b>417</b>   |                                                      | <b>C</b> | <b>WD</b> |          |          |          | <b>I</b> | <b>I</b> | <b>C</b>          |
| A*02:10                                                 | 02:10                  | HLA00015 | 02:10:01G                                     | 0          | 146          | 1           | 0           | 0           | 0          | 27          | 174          |                                                      | C        |           |          |          |          | I        | I        | C                 |
| A*02:10:01G                                             | 02:10:01G              |          | 02:10:01G                                     | 1          | 204          | 7           | 1           | 0           | 0          | 30          | 243          |                                                      | C        | WD        |          |          |          | I        | I        | C                 |
| <b>A*02:11 total</b>                                    | <b>02:11 total</b>     |          |                                               | <b>280</b> | <b>66094</b> | <b>1770</b> | <b>1299</b> | <b>2576</b> | <b>491</b> | <b>2085</b> | <b>74595</b> | <b>C</b>                                             | <b>C</b> | <b>C</b>  | <b>C</b> | <b>C</b> | <b>C</b> | <b>C</b> | <b>C</b> | <b>C</b>          |
| A*02:11                                                 | 02:11                  |          |                                               | 0          | 4            | 29          | 0           | 5           | 0          | 1           | 39           |                                                      |          | WD        |          | WD       |          |          | WD       | WD                |
| A*02:11P                                                | 02:11P                 |          |                                               | 0          | 0            | 3           | 0           | 1           | 0          | 0           | 4            |                                                      |          |           |          |          |          |          |          |                   |
| <b>A*02:11:01G total</b>                                | <b>02:11:01G total</b> |          |                                               | <b>280</b> | <b>66050</b> | <b>1738</b> | <b>1299</b> | <b>2570</b> | <b>491</b> | <b>2083</b> | <b>74511</b> | <b>C</b>                                             | <b>C</b> | <b>C</b>  | <b>C</b> | <b>C</b> | <b>C</b> | <b>C</b> | <b>C</b> | <b>C</b>          |
| A*02:11:01G                                             | 02:11:01G              |          | 02:11:01G                                     | 215        | 63306        | 1688        | 1247        | 1988        | 346        | 1829        | 70619        | C                                                    | C        | C         | C        | C        | C        | C        | C        | C                 |
| A*02:11:01                                              | 02:11:01               | HLA00016 | 02:11:01G                                     | 65         | 2744         | 50          | 52          | 580         | 145        | 254         | 3890         | C                                                    | C        | WD        | C        | C        | C        | C        | C        | C                 |
| A*02:69                                                 | 02:69                  | HLA01903 | 02:11:01G                                     | 0          | 0            | 0           | 0           | 2           | 0          | 0           | 2            |                                                      |          |           |          |          |          |          |          |                   |
| A*02:11:02                                              | 02:11:02               | HLA05644 |                                               | 0          | 6            | 0           | 0           | 0           | 0          | 0           | 6            |                                                      | WD       |           |          |          |          |          | WD       | WD                |
| A*02:11:04                                              | 02:11:04               | HLA06089 |                                               | 0          | 6            | 0           | 0           | 0           | 0          | 0           | 6            |                                                      | WD       |           |          |          |          |          | WD       | WD                |

| Supplemental Table 8: HLA-A Allele Summary <sup>a</sup> |                        |          | Allele Count by Population Group <sup>b</sup> |            |             |              |             |             |            |             |              | 3.0.0 CIWD Category by Population Group <sup>c</sup> |          |           |           |          |          |          |          |                   |
|---------------------------------------------------------|------------------------|----------|-----------------------------------------------|------------|-------------|--------------|-------------|-------------|------------|-------------|--------------|------------------------------------------------------|----------|-----------|-----------|----------|----------|----------|----------|-------------------|
| Allele                                                  | Genomic Typing         | AlleleID | G group                                       | AFA        | API         | EURO         | MENA        | HIS         | NAM        | UNK         | Total        | AFA                                                  | API      | EURO      | MENA      | HIS      | NAM      | UNK      | Total    | Highest Frequency |
| A*02:11:05                                              | 02:11:05               | HLA09880 |                                               | 0          | 1           | 0            | 0           | 0           | 0          | 0           | 1            |                                                      |          |           |           |          |          |          |          |                   |
| A*02:11:06                                              | 02:11:06               | HLA10989 |                                               | 0          | 26          | 0            | 0           | 0           | 0          | 0           | 26           |                                                      | I        |           |           |          |          |          | WD       | I                 |
| A*02:11:09                                              | 02:11:09               | HLA13461 |                                               | 0          | 1           | 0            | 0           | 0           | 0          | 1           | 2            |                                                      |          |           |           |          |          |          |          |                   |
| A*02:12                                                 | 02:12                  | HLA00017 |                                               | 1          | 20          | 276          | 36          | 50          | 1          | 91          | 475          |                                                      | I        | I         | WD        | I        |          | I        | I        | I                 |
| A*02:13                                                 | 02:13                  | HLA00018 |                                               | 12         | 10          | 363          | 1           | 721         | 49         | 170         | 1326         | WD                                                   | WD       | I         |           | C        | C        | C        | I        | C                 |
| A*02:14                                                 | 02:14                  | HLA00019 |                                               | 178        | 1           | 51           | 84          | 22          | 0          | 43          | 379          | C                                                    |          | WD        | C         | I        |          | I        | I        | C                 |
| <b>A*02:16 total</b>                                    | <b>02:16 total</b>     |          |                                               | <b>12</b>  | <b>4938</b> | <b>38</b>    | <b>23</b>   | <b>4</b>    | <b>4</b>   | <b>69</b>   | <b>5088</b>  | <b>WD</b>                                            | <b>C</b> | <b>WD</b> | <b>WD</b> |          |          | <b>I</b> | <b>C</b> | <b>C</b>          |
| <b>A*02:16:01G total</b>                                | <b>02:16:01G total</b> |          |                                               | <b>12</b>  | <b>4938</b> | <b>38</b>    | <b>23</b>   | <b>4</b>    | <b>4</b>   | <b>69</b>   | <b>5088</b>  | <b>WD</b>                                            | <b>C</b> | <b>WD</b> | <b>WD</b> |          |          | <b>I</b> | <b>C</b> | <b>C</b>          |
| A*02:16                                                 | 02:16                  | HLA00021 | 02:16:01G                                     | 0          | 2           | 0            | 0           | 0           | 0          | 1           | 3            |                                                      |          |           |           |          |          |          |          |                   |
| A*02:16:01G                                             | 02:16:01G              |          | 02:16:01G                                     | 10         | 4811        | 36           | 23          | 3           | 3          | 60          | 4946         | WD                                                   | C        | WD        | WD        |          |          | I        | C        | C                 |
| A*02:131                                                | 02:131                 | HLA03096 | 02:16:01G                                     | 2          | 125         | 2            | 0           | 1           | 1          | 8           | 139          |                                                      | I        |           |           |          |          | WD       | WD       | I                 |
| <b>A*02:17 total</b>                                    | <b>02:17 total</b>     |          |                                               | <b>148</b> | <b>61</b>   | <b>11445</b> | <b>1890</b> | <b>1517</b> | <b>345</b> | <b>1097</b> | <b>16503</b> | <b>C</b>                                             | <b>I</b> | <b>C</b>  | <b>C</b>  | <b>C</b> | <b>C</b> | <b>C</b> | <b>C</b> | <b>C</b>          |
| A*02:17                                                 | 02:17                  |          |                                               | 76         | 10          | 3053         | 473         | 856         | 220        | 637         | 5325         | C                                                    | WD       | C         | C         | C        | C        | C        | C        | C                 |
| A*02:17P                                                | 02:17P                 |          |                                               | 0          | 0           | 3            | 0           | 0           | 0          | 0           | 3            |                                                      |          |           |           |          |          |          |          |                   |
| <b>A*02:17:01G total</b>                                | <b>02:17:01G total</b> |          |                                               | <b>72</b>  | <b>51</b>   | <b>8388</b>  | <b>1417</b> | <b>661</b>  | <b>125</b> | <b>460</b>  | <b>11174</b> | <b>C</b>                                             | <b>I</b> | <b>C</b>  | <b>C</b>  | <b>C</b> | <b>C</b> | <b>C</b> | <b>C</b> | <b>C</b>          |
| A*02:17:01G                                             | 02:17:01G              |          | 02:17:01G                                     | 29         | 43          | 8051         | 1377        | 267         | 14         | 353         | 10134        | WD                                                   | I        | C         | C         | C        | C        | C        | C        | C                 |
| A*02:17:02                                              | 02:17:02               | HLA00023 | 02:17:01G                                     | 43         | 8           | 337          | 40          | 394         | 111        | 107         | 1040         | C                                                    | WD       | I         | WD        | C        | C        | I        | I        | C                 |
| A*02:17:03                                              | 02:17:03               | HLA09325 |                                               | 0          | 0           | 1            | 0           | 0           | 0          | 0           | 1            |                                                      |          |           |           |          |          |          |          |                   |
| A*02:18                                                 | 02:18                  | HLA00024 |                                               | 0          | 2           | 0            | 0           | 0           | 0          | 8           | 10           |                                                      |          |           |           |          |          |          | WD       | WD                |
| A*02:19                                                 | 02:19                  | HLA00025 |                                               | 0          | 0           | 61           | 0           | 46          | 0          | 55          | 162          |                                                      |          | WD        |           | I        |          | I        | I        | I                 |
| <b>A*02:20 total</b>                                    | <b>02:20 total</b>     |          |                                               | <b>38</b>  | <b>1265</b> | <b>1679</b>  | <b>191</b>  | <b>681</b>  | <b>119</b> | <b>332</b>  | <b>4305</b>  | <b>WD</b>                                            | <b>C</b> | <b>C</b>  | <b>C</b>  | <b>C</b> | <b>C</b> | <b>C</b> | <b>C</b> | <b>C</b>          |
| A*02:20                                                 | 02:20                  |          |                                               | 2          | 33          | 127          | 22          | 75          | 13         | 21          | 293          |                                                      | I        | I         | WD        | C        | C        | I        | I        | C                 |
| A*02:20:01                                              | 02:20:01               | HLA00026 |                                               | 32         | 13          | 1520         | 109         | 603         | 102        | 284         | 2663         | WD                                                   | I        | C         | C         | C        | C        | C        | C        | C                 |
| A*02:20:02                                              | 02:20:02               | HLA01260 |                                               | 4          | 1219        | 32           | 60          | 3           | 4          | 27          | 1349         |                                                      | C        | WD        | C         |          |          | I        | I        | C                 |
| A*02:21                                                 | 02:21                  | HLA00027 |                                               | 0          | 0           | 27           | 0           | 2           | 0          | 4           | 33           |                                                      |          | WD        |           |          |          |          | WD       | WD                |
| <b>A*02:22 total</b>                                    | <b>02:22 total</b>     |          |                                               | <b>165</b> | <b>21</b>   | <b>1908</b>  | <b>248</b>  | <b>1182</b> | <b>123</b> | <b>450</b>  | <b>4097</b>  | <b>C</b>                                             | <b>I</b> | <b>C</b>  | <b>C</b>  | <b>C</b> | <b>C</b> | <b>C</b> | <b>C</b> | <b>C</b>          |
| A*02:22                                                 | 02:22                  |          |                                               | 1          | 0           | 17           | 0           | 0           | 0          | 1           | 19           |                                                      |          | WD        |           |          |          |          | WD       | WD                |
| <b>A*02:22:01G total</b>                                | <b>02:22:01G total</b> |          |                                               | <b>164</b> | <b>21</b>   | <b>1891</b>  | <b>248</b>  | <b>1182</b> | <b>123</b> | <b>449</b>  | <b>4078</b>  | <b>C</b>                                             | <b>I</b> | <b>C</b>  | <b>C</b>  | <b>C</b> | <b>C</b> | <b>C</b> | <b>C</b> | <b>C</b>          |
| A*02:22:01G                                             | 02:22:01G              |          | 02:22:01G                                     | 133        | 17          | 1845         | 240         | 927         | 84         | 396         | 3642         | C                                                    | I        | C         | C         | C        | C        | C        | C        | C                 |
| A*02:22:01                                              | 02:22:01               |          | 02:22:01G                                     | 30         | 4           | 46           | 8           | 255         | 39         | 53          | 435          | WD                                                   |          | WD        | WD        | C        | C        | I        | I        | C                 |

| Supplemental Table 8: HLA-A Allele Summary <sup>a</sup> |                    |          | Allele Count by Population Group <sup>b</sup> |           |           |             |           |           |          |            |             | 3.0.0 CIWD Category by Population Group <sup>c</sup> |          |           |           |          |     |          |           |                   |
|---------------------------------------------------------|--------------------|----------|-----------------------------------------------|-----------|-----------|-------------|-----------|-----------|----------|------------|-------------|------------------------------------------------------|----------|-----------|-----------|----------|-----|----------|-----------|-------------------|
| Allele                                                  | Genomic Typing     | AlleleID | G group                                       | AFA       | API       | EURO        | MENA      | HIS       | NAM      | UNK        | Total       | AFA                                                  | API      | EURO      | MENA      | HIS      | NAM | UNK      | Total     | Highest Frequency |
| A*02:104                                                | 02:104             | HLA02668 | 02:22:01G                                     | 1         | 0         | 0           | 0         | 0         | 0        | 0          | 1           |                                                      |          |           |           |          |     |          |           |                   |
| <b>A*02:24 total</b>                                    | <b>02:24 total</b> |          |                                               | <b>16</b> | <b>3</b>  | <b>712</b>  | <b>4</b>  | <b>63</b> | <b>2</b> | <b>84</b>  | <b>884</b>  | <b>WD</b>                                            |          | <b>I</b>  |           | <b>I</b> |     | <b>I</b> | <b>I</b>  | <b>I</b>          |
| A*02:24                                                 | 02:24              |          |                                               | 2         | 0         | 58          | 0         | 9         | 0        | 5          | 74          |                                                      |          | WD        |           | I        |     | WD       | WD        | I                 |
| A*02:24:01                                              | 02:24:01           | HLA00030 |                                               | 14        | 3         | 653         | 4         | 54        | 2        | 79         | 809         | WD                                                   |          | I         |           | I        |     | I        | I         | I                 |
| A*02:24:02                                              | 02:24:02           | HLA05964 |                                               | 0         | 0         | 1           | 0         | 0         | 0        | 0          | 1           |                                                      |          |           |           |          |     |          |           |                   |
| A*02:25                                                 | 02:25              | HLA00031 |                                               | 0         | 0         | 2           | 0         | 0         | 0        | 0          | 2           |                                                      |          |           |           |          |     |          |           |                   |
| A*02:26                                                 | 02:26              | HLA00032 |                                               | 0         | 0         | 86          | 2         | 3         | 0        | 8          | 99          |                                                      |          | WD        |           |          |     | WD       | WD        | WD                |
| A*02:27                                                 | 02:27              | HLA00033 |                                               | 0         | 6         | 963         | 3         | 3         | 0        | 11         | 986         |                                                      | WD       | I         |           |          |     | WD       | I         | I                 |
| A*02:28                                                 | 02:28              | HLA00034 |                                               | 0         | 12        | 1           | 0         | 0         | 0        | 4          | 17          |                                                      | WD       |           |           |          |     |          | WD        | WD                |
| A*02:29                                                 | 02:29              | HLA00035 |                                               | 0         | 4         | 533         | 0         | 5         | 1        | 29         | 572         |                                                      |          | I         |           | WD       |     | I        | I         | I                 |
| <b>A*02:30 total</b>                                    | <b>02:30 total</b> |          |                                               | <b>6</b>  | <b>16</b> | <b>4788</b> | <b>9</b>  | <b>17</b> | <b>0</b> | <b>181</b> | <b>5017</b> | <b>WD</b>                                            | <b>I</b> | <b>C</b>  | <b>WD</b> | <b>I</b> |     | <b>C</b> | <b>C</b>  | <b>C</b>          |
| A*02:30                                                 | 02:30              |          |                                               | 5         | 12        | 3650        | 6         | 11        | 0        | 115        | 3799        | WD                                                   | WD       | C         | WD        | I        |     | I        | C         | C                 |
| A*02:30:01                                              | 02:30:01           | HLA00036 |                                               | 1         | 4         | 1136        | 3         | 6         | 0        | 66         | 1216        |                                                      |          | I         |           | WD       |     | I        | I         | I                 |
| A*02:30:02                                              | 02:30:02           | HLA15258 |                                               | 0         | 0         | 2           | 0         | 0         | 0        | 0          | 2           |                                                      |          |           |           |          |     |          |           |                   |
| A*02:31                                                 | 02:31              | HLA00967 |                                               | 3         | 0         | 5           | 0         | 2         | 0        | 1          | 11          |                                                      |          | WD        |           |          |     |          | WD        | WD                |
| A*02:33                                                 | 02:33              | HLA01033 |                                               | 2         | 2         | 55          | 1         | 191       | 8        | 82         | 341         |                                                      |          | WD        |           | C        | C   | I        | I         | C                 |
| A*02:34                                                 | 02:34              | HLA01034 |                                               | 0         | 0         | 37          | 0         | 0         | 0        | 10         | 47          |                                                      |          | WD        |           |          |     | WD       | WD        | WD                |
| <b>A*02:35 total</b>                                    | <b>02:35 total</b> |          |                                               | <b>5</b>  | <b>94</b> | <b>2124</b> | <b>15</b> | <b>4</b>  | <b>0</b> | <b>24</b>  | <b>2266</b> | <b>WD</b>                                            | <b>I</b> | <b>C</b>  | <b>WD</b> |          |     | <b>I</b> | <b>C</b>  | <b>C</b>          |
| A*02:35                                                 | 02:35              |          |                                               | 0         | 3         | 45          | 0         | 1         | 0        | 0          | 49          |                                                      |          | WD        |           |          |     |          | WD        | WD                |
| A*02:35:01                                              | 02:35:01           | HLA01035 |                                               | 5         | 91        | 2071        | 15        | 3         | 0        | 24         | 2209        | WD                                                   | I        | C         | WD        |          |     | I        | C         | C                 |
| A*02:35:02                                              | 02:35:02           | HLA01946 |                                               | 0         | 0         | 8           | 0         | 0         | 0        | 0          | 8           |                                                      |          | WD        |           |          |     |          | WD        | WD                |
| A*02:36                                                 | 02:36              | HLA01036 |                                               | 0         | 1         | 34          | 0         | 0         | 0        | 5          | 40          |                                                      |          | WD        |           |          |     | WD       | WD        | WD                |
| A*02:37                                                 | 02:37              | HLA01102 |                                               | 0         | 0         | 15          | 1         | 1         | 0        | 2          | 19          |                                                      |          | WD        |           |          |     |          | WD        | WD                |
| A*02:38                                                 | 02:38              | HLA01105 |                                               | 4         | 1         | 163         | 0         | 3         | 1        | 12         | 184         |                                                      |          | I         |           |          |     | WD       | I         | I                 |
| A*02:39                                                 | 02:39              | HLA01109 |                                               | 0         | 0         | 3           | 0         | 34        | 4        | 7          | 48          |                                                      |          |           |           | I        |     | WD       | WD        | I                 |
| <b>A*02:40 total</b>                                    | <b>02:40 total</b> |          |                                               | <b>0</b>  | <b>0</b>  | <b>6</b>    | <b>0</b>  | <b>0</b>  | <b>0</b> | <b>1</b>   | <b>7</b>    |                                                      |          | <b>WD</b> |           |          |     |          | <b>WD</b> | <b>WD</b>         |
| A*02:40                                                 | 02:40              |          |                                               | 0         | 0         | 2           | 0         | 0         | 0        | 0          | 2           |                                                      |          |           |           |          |     |          |           |                   |
| A*02:40:01                                              | 02:40:01           | HLA01121 |                                               | 0         | 0         | 4           | 0         | 0         | 0        | 1          | 5           |                                                      |          |           |           |          |     |          | WD        | WD                |
| A*02:41                                                 | 02:41              | HLA01172 |                                               | 0         | 1         | 0           | 0         | 0         | 0        | 0          | 1           |                                                      |          |           |           |          |     |          |           |                   |
| A*02:42                                                 | 02:42              | HLA01198 |                                               | 0         | 5         | 2           | 0         | 0         | 0        | 1          | 8           |                                                      | WD       |           |           |          |     |          | WD        | WD                |



| Supplemental Table 8: HLA-A Allele Summary <sup>a</sup> |                        |          | Allele Count by Population Group <sup>b</sup> |            |           |            |           |           |          |           |            | 3.0.0 CIWD Category by Population Group <sup>c</sup> |          |           |           |          |          |           |           |                   |
|---------------------------------------------------------|------------------------|----------|-----------------------------------------------|------------|-----------|------------|-----------|-----------|----------|-----------|------------|------------------------------------------------------|----------|-----------|-----------|----------|----------|-----------|-----------|-------------------|
| Allele                                                  | Genomic Typing         | AlleleID | G group                                       | AFA        | API       | EURO       | MENA      | HIS       | NAM      | UNK       | Total      | AFA                                                  | API      | EURO      | MENA      | HIS      | NAM      | UNK       | Total     | Highest Frequency |
| A*02:44                                                 | 02:44                  | HLA01222 |                                               | 1          | 1         | 8          | 0         | 44        | 4        | 23        | 81         |                                                      |          | WD        |           | I        |          | I         | WD        | I                 |
| A*02:45                                                 | 02:45                  | HLA01249 |                                               | 0          | 0         | 6          | 0         | 10        | 0        | 1         | 17         |                                                      |          | WD        |           | I        |          |           | WD        | I                 |
| A*02:46                                                 | 02:46                  | HLA01274 |                                               | 0          | 1         | 5          | 0         | 0         | 0        | 1         | 7          |                                                      |          | WD        |           |          |          |           | WD        | WD                |
| A*02:47                                                 | 02:47                  | HLA01324 |                                               | 4          | 0         | 0          | 0         | 0         | 0        | 2         | 6          |                                                      |          |           |           |          |          |           | WD        | WD                |
| A*02:48                                                 | 02:48                  | HLA01331 |                                               | 0          | 5         | 3          | 0         | 0         | 0        | 0         | 8          |                                                      | WD       |           |           |          |          |           | WD        | WD                |
| <b>A*02:49 total</b>                                    | <b>02:49 total</b>     |          |                                               | <b>0</b>   | <b>0</b>  | <b>55</b>  | <b>9</b>  | <b>0</b>  | <b>0</b> | <b>9</b>  | <b>73</b>  |                                                      |          | <b>WD</b> | <b>WD</b> |          |          | <b>WD</b> | <b>WD</b> | <b>WD</b>         |
| <b>A*02:49:01G total</b>                                | <b>02:49:01G total</b> |          |                                               | <b>0</b>   | <b>0</b>  | <b>55</b>  | <b>9</b>  | <b>0</b>  | <b>0</b> | <b>9</b>  | <b>73</b>  |                                                      |          | <b>WD</b> | <b>WD</b> |          |          | <b>WD</b> | <b>WD</b> | <b>WD</b>         |
| A*02:49                                                 | 02:49                  | HLA01404 | 02:49:01G                                     | 0          | 0         | 51         | 9         | 0         | 0        | 9         | 69         |                                                      |          | WD        | WD        |          |          | WD        | WD        | WD                |
| A*02:49:01G                                             | 02:49:01G              |          | 02:49:01G                                     | 0          | 0         | 3          | 0         | 0         | 0        | 0         | 3          |                                                      |          |           |           |          |          |           |           |                   |
| A*02:683                                                | 02:683                 | HLA17047 | 02:49:01G                                     | 0          | 0         | 1          | 0         | 0         | 0        | 0         | 1          |                                                      |          |           |           |          |          |           |           |                   |
| A*02:51                                                 | 02:51                  | HLA01478 |                                               | 0          | 0         | 0          | 0         | 4         | 2        | 2         | 8          |                                                      |          |           |           |          |          |           | WD        | WD                |
| A*02:52                                                 | 02:52                  | HLA01533 |                                               | 0          | 0         | 25         | 0         | 41        | 0        | 36        | 102        |                                                      |          | WD        |           | I        |          | I         | WD        | I                 |
| A*02:53N                                                | 02:53N                 | HLA01534 |                                               | 0          | 52        | 1          | 0         | 0         | 0        | 6         | 59         |                                                      | I        |           |           |          |          | WD        | WD        | I                 |
| A*02:54                                                 | 02:54                  | HLA01545 |                                               | 0          | 0         | 0          | 0         | 2         | 0        | 0         | 2          |                                                      |          |           |           |          |          |           |           |                   |
| A*02:55                                                 | 02:55                  | HLA01562 |                                               | 0          | 0         | 3          | 0         | 0         | 0        | 0         | 3          |                                                      |          |           |           |          |          |           |           |                   |
| <b>A*02:56 total</b>                                    | <b>02:56 total</b>     |          |                                               | <b>0</b>   | <b>1</b>  | <b>126</b> | <b>1</b>  | <b>0</b>  | <b>0</b> | <b>4</b>  | <b>132</b> |                                                      |          | <b>I</b>  |           |          |          |           | <b>WD</b> | <b>I</b>          |
| A*02:56                                                 | 02:56                  |          |                                               | 0          | 0         | 8          | 1         | 0         | 0        | 1         | 10         |                                                      |          | WD        |           |          |          |           | WD        | WD                |
| A*02:56:01                                              | 02:56:01               | HLA01575 |                                               | 0          | 0         | 117        | 0         | 0         | 0        | 3         | 120        |                                                      |          | WD        |           |          |          |           | WD        | WD                |
| A*02:56:02                                              | 02:56:02               | HLA03474 |                                               | 0          | 1         | 1          | 0         | 0         | 0        | 0         | 2          |                                                      |          |           |           |          |          |           |           |                   |
| A*02:57                                                 | 02:57                  | HLA01609 |                                               | 0          | 0         | 0          | 0         | 7         | 0        | 1         | 8          |                                                      |          |           |           | WD       |          |           | WD        | WD                |
| A*02:58                                                 | 02:58                  | HLA01610 |                                               | 0          | 0         | 1          | 0         | 25        | 0        | 3         | 29         |                                                      |          |           |           | I        |          |           | WD        | I                 |
| A*02:59                                                 | 02:59                  | HLA01666 |                                               | 0          | 0         | 5          | 0         | 0         | 0        | 0         | 5          |                                                      |          | WD        |           |          |          |           | WD        | WD                |
| <b>A*02:60 total</b>                                    | <b>02:60 total</b>     |          |                                               | <b>409</b> | <b>3</b>  | <b>25</b>  | <b>1</b>  | <b>50</b> | <b>4</b> | <b>82</b> | <b>574</b> | <b>C</b>                                             |          | <b>WD</b> |           | <b>I</b> |          | <b>I</b>  | <b>I</b>  | <b>C</b>          |
| A*02:60                                                 | 02:60                  |          |                                               | 33         | 1         | 6          | 0         | 8         | 0        | 3         | 51         | WD                                                   |          | WD        |           | I        |          |           | WD        | I                 |
| A*02:60:01                                              | 02:60:01               | HLA01665 |                                               | 376        | 2         | 19         | 1         | 42        | 4        | 79        | 523        | C                                                    |          | WD        |           | I        |          | I         | I         | C                 |
| A*02:61                                                 | 02:61                  | HLA01699 |                                               | 0          | 1         | 0          | 0         | 0         | 0        | 0         | 1          |                                                      |          |           |           |          |          |           |           |                   |
| A*02:63                                                 | 02:63                  | HLA01735 |                                               | 13         | 0         | 0          | 0         | 0         | 0        | 1         | 14         | WD                                                   |          |           |           |          |          |           | WD        | WD                |
| <b>A*02:64 total</b>                                    | <b>02:64 total</b>     |          |                                               | <b>0</b>   | <b>34</b> | <b>75</b>  | <b>18</b> | <b>51</b> | <b>8</b> | <b>27</b> | <b>213</b> |                                                      | <b>I</b> | <b>WD</b> | <b>WD</b> | <b>I</b> | <b>C</b> | <b>I</b>  | <b>I</b>  | <b>C</b>          |
| A*02:64                                                 | 02:64                  |          |                                               | 0          | 27        | 38         | 16        | 40        | 6        | 16        | 143        |                                                      | I        | WD        | WD        | I        | WD       | I         | WD        | I                 |
| A*02:64:01                                              | 02:64:01               | HLA01760 |                                               | 0          | 7         | 37         | 2         | 11        | 2        | 11        | 70         |                                                      | WD       | WD        |           | I        |          | WD        | WD        | I                 |

| Supplemental Table 8: HLA-A Allele Summary <sup>a</sup> |                        |          | Allele Count by Population Group <sup>b</sup> |     |     |      |      |     |     |     |       | 3.0.0 CIWD Category by Population Group <sup>c</sup> |     |      |      |     |     |     |       |                   |  |
|---------------------------------------------------------|------------------------|----------|-----------------------------------------------|-----|-----|------|------|-----|-----|-----|-------|------------------------------------------------------|-----|------|------|-----|-----|-----|-------|-------------------|--|
| Allele                                                  | Genomic Typing         | AlleleID | G group                                       | AFA | API | EURO | MENA | HIS | NAM | UNK | Total | AFA                                                  | API | EURO | MENA | HIS | NAM | UNK | Total | Highest Frequency |  |
| <b>A*02:65 total</b>                                    | <b>02:65 total</b>     |          |                                               | 0   | 0   | 2    | 0    | 0   | 0   | 0   | 2     |                                                      |     |      |      |     |     |     |       |                   |  |
| A*02:65                                                 | 02:65                  | HLA01778 |                                               | 0   | 0   | 2    | 0    | 0   | 0   | 0   | 2     |                                                      |     |      |      |     |     |     |       |                   |  |
| A*02:67                                                 | 02:67                  | HLA01802 |                                               | 0   | 0   | 58   | 0    | 0   | 0   | 0   | 58    |                                                      |     | WD   |      |     |     |     | WD    | WD                |  |
| A*02:68                                                 | 02:68                  | HLA01867 |                                               | 0   | 0   | 1    | 0    | 0   | 0   | 0   | 1     |                                                      |     |      |      |     |     |     |       |                   |  |
| A*02:70                                                 | 02:70                  | HLA01928 |                                               | 1   | 0   | 1    | 0    | 0   | 0   | 0   | 2     |                                                      |     |      |      |     |     |     |       |                   |  |
| A*02:72                                                 | 02:72                  | HLA01955 |                                               | 0   | 1   | 0    | 0    | 0   | 0   | 0   | 1     |                                                      |     |      |      |     |     |     |       |                   |  |
| <b>A*02:74 total</b>                                    | <b>02:74 total</b>     |          |                                               | 1   | 0   | 34   | 0    | 1   | 0   | 1   | 37    |                                                      |     | WD   |      |     |     |     | WD    | WD                |  |
| A*02:74                                                 | 02:74                  |          |                                               | 0   | 0   | 2    | 0    | 0   | 0   | 1   | 3     |                                                      |     |      |      |     |     |     |       |                   |  |
| A*02:74:01                                              | 02:74:01               | HLA02028 |                                               | 0   | 0   | 27   | 0    | 0   | 0   | 0   | 27    |                                                      |     | WD   |      |     |     |     | WD    | WD                |  |
| A*02:74:02                                              | 02:74:02               | HLA02126 |                                               | 1   | 0   | 5    | 0    | 1   | 0   | 0   | 7     |                                                      |     | WD   |      |     |     |     | WD    | WD                |  |
| <b>A*02:76 total</b>                                    | <b>02:76 total</b>     |          |                                               | 0   | 0   | 6    | 0    | 0   | 0   | 0   | 6     |                                                      |     | WD   |      |     |     |     | WD    | WD                |  |
| A*02:76                                                 | 02:76                  |          |                                               | 0   | 0   | 2    | 0    | 0   | 0   | 0   | 2     |                                                      |     |      |      |     |     |     |       |                   |  |
| A*02:76:01                                              | 02:76:01               | HLA02081 |                                               | 0   | 0   | 3    | 0    | 0   | 0   | 0   | 3     |                                                      |     |      |      |     |     |     |       |                   |  |
| A*02:76:02                                              | 02:76:02               | HLA07333 |                                               | 0   | 0   | 1    | 0    | 0   | 0   | 0   | 1     |                                                      |     |      |      |     |     |     |       |                   |  |
| A*02:77                                                 | 02:77                  | HLA02082 |                                               | 2   | 0   | 29   | 0    | 0   | 0   | 2   | 33    |                                                      |     | WD   |      |     |     |     | WD    | WD                |  |
| A*02:80                                                 | 02:80                  | HLA02160 |                                               | 0   | 1   | 0    | 0    | 0   | 0   | 0   | 1     |                                                      |     |      |      |     |     |     |       |                   |  |
| <b>A*02:81 total</b>                                    | <b>02:81 total</b>     |          |                                               | 0   | 0   | 6    | 0    | 0   | 0   | 0   | 6     |                                                      |     | WD   |      |     |     |     | WD    | WD                |  |
| <b>A*02:81:01G total</b>                                | <b>02:81:01G total</b> |          |                                               | 0   | 0   | 6    | 0    | 0   | 0   | 0   | 6     |                                                      |     | WD   |      |     |     |     | WD    | WD                |  |
| A*02:81:01G                                             | 02:81:01G              |          | 02:81:01G                                     | 0   | 0   | 6    | 0    | 0   | 0   | 0   | 6     |                                                      |     | WD   |      |     |     |     | WD    | WD                |  |
| A*02:84                                                 | 02:84                  | HLA02233 |                                               | 8   | 0   | 3    | 0    | 0   | 5   | 10  | 26    | WD                                                   |     |      |      |     | WD  | WD  | WD    | WD                |  |
| A*02:85                                                 | 02:85                  | HLA02235 |                                               | 10  | 0   | 106  | 91   | 3   | 0   | 20  | 230   | WD                                                   |     | WD   | C    |     |     | I   | I     | C                 |  |
| <b>A*02:86 total</b>                                    | <b>02:86 total</b>     |          |                                               | 11  | 1   | 59   | 0    | 1   | 2   | 12  | 86    | WD                                                   |     | WD   |      |     |     | WD  | WD    | WD                |  |
| A*02:86                                                 | 02:86                  |          |                                               | 8   | 1   | 54   | 0    | 0   | 2   | 10  | 75    | WD                                                   |     | WD   |      |     |     | WD  | WD    | WD                |  |
| A*02:86:01                                              | 02:86:01               | HLA02248 |                                               | 3   | 0   | 5    | 0    | 1   | 0   | 2   | 11    |                                                      |     | WD   |      |     |     |     | WD    | WD                |  |
| A*02:87                                                 | 02:87                  | HLA02321 |                                               | 1   | 0   | 19   | 1    | 16  | 3   | 8   | 48    |                                                      |     | WD   |      | I   |     | WD  | WD    | I                 |  |
| A*02:88N                                                | 02:88N                 | HLA02337 |                                               | 0   | 0   | 4    | 0    | 0   | 0   | 0   | 4     |                                                      |     |      |      |     |     |     |       |                   |  |
| A*02:90                                                 | 02:90                  | HLA02374 |                                               | 0   | 2   | 34   | 4    | 0   | 0   | 0   | 40    |                                                      |     | WD   |      |     |     |     | WD    | WD                |  |
| A*02:92                                                 | 02:92                  | HLA02440 |                                               | 0   | 0   | 3    | 0    | 0   | 0   | 0   | 3     |                                                      |     |      |      |     |     |     |       |                   |  |
| <b>A*02:93 total</b>                                    | <b>02:93 total</b>     |          |                                               | 0   | 3   | 42   | 94   | 0   | 0   | 9   | 148   |                                                      |     | WD   | C    |     |     | WD  | WD    | C                 |  |
| A*02:93                                                 | 02:93                  |          |                                               | 0   | 2   | 38   | 89   | 0   | 0   | 8   | 137   |                                                      |     | WD   | C    |     |     | WD  | WD    | C                 |  |

| Supplemental Table 8: HLA-A Allele Summary <sup>a</sup> |                      |          | Allele Count by Population Group <sup>b</sup> |          |          |           |          |          |          |          |           |     | 3.0.0 CIWD Category by Population Group <sup>c</sup> |           |      |     |     |     |           |                   |
|---------------------------------------------------------|----------------------|----------|-----------------------------------------------|----------|----------|-----------|----------|----------|----------|----------|-----------|-----|------------------------------------------------------|-----------|------|-----|-----|-----|-----------|-------------------|
| Allele                                                  | Genomic Typing       | AlleleID | G group                                       | AFA      | API      | EURO      | MENA     | HIS      | NAM      | UNK      | Total     | AFA | API                                                  | EURO      | MENA | HIS | NAM | UNK | Total     | Highest Frequency |
| A*02:93:01                                              | 02:93:01             | HLA02468 |                                               | 0        | 1        | 4         | 5        | 0        | 0        | 1        | 11        |     |                                                      |           | WD   |     |     |     | WD        | WD                |
| A*02:94N                                                | 02:94N               | HLA02476 |                                               | 0        | 0        | 28        | 0        | 0        | 0        | 3        | 31        |     |                                                      | WD        |      |     |     |     | WD        | WD                |
| A*02:95                                                 | 02:95                | HLA02481 |                                               | 0        | 4        | 57        | 0        | 0        | 0        | 2        | 63        |     |                                                      | WD        |      |     |     |     | WD        | WD                |
| A*02:96                                                 | 02:96                | HLA02501 |                                               | 0        | 0        | 96        | 0        | 5        | 0        | 31       | 132       |     |                                                      | WD        |      | WD  |     | I   | WD        | I                 |
| <b>A*02:101 total</b>                                   | <b>02:101 total</b>  |          |                                               | <b>0</b> | <b>2</b> | <b>15</b> | <b>1</b> | <b>1</b> | <b>0</b> | <b>2</b> | <b>21</b> |     |                                                      | <b>WD</b> |      |     |     |     | <b>WD</b> | <b>WD</b>         |
| A*02:101                                                | 02:101               |          |                                               | 0        | 0        | 4         | 0        | 0        | 0        | 0        | 4         |     |                                                      |           |      |     |     |     |           |                   |
| A*02:101:01                                             | 02:101:01            | HLA02538 |                                               | 0        | 0        | 6         | 1        | 1        | 0        | 1        | 9         |     |                                                      | WD        |      |     |     |     | WD        | WD                |
| A*02:101:02                                             | 02:101:02            | HLA06098 |                                               | 0        | 2        | 5         | 0        | 0        | 0        | 1        | 8         |     |                                                      | WD        |      |     |     |     | WD        | WD                |
| A*02:102                                                | 02:102               | HLA02541 |                                               | 1        | 0        | 2         | 10       | 1        | 0        | 17       | 31        |     |                                                      |           | WD   |     |     | I   | WD        | I                 |
| A*02:105                                                | 02:105               | HLA02703 |                                               | 0        | 0        | 5         | 0        | 4        | 1        | 4        | 14        |     |                                                      | WD        |      |     |     |     | WD        | WD                |
| A*02:107                                                | 02:107               | HLA02711 |                                               | 0        | 0        | 21        | 0        | 0        | 0        | 12       | 33        |     |                                                      | WD        |      |     |     | WD  | WD        | WD                |
| A*02:108                                                | 02:108               | HLA02724 |                                               | 0        | 1        | 0         | 0        | 0        | 0        | 0        | 1         |     |                                                      |           |      |     |     |     |           |                   |
| A*02:109                                                | 02:109               | HLA02755 |                                               | 0        | 0        | 5         | 0        | 1        | 0        | 0        | 6         |     |                                                      | WD        |      |     |     |     | WD        | WD                |
| A*02:110                                                | 02:110               | HLA02776 |                                               | 0        | 0        | 8         | 16       | 0        | 0        | 1        | 25        |     |                                                      | WD        | WD   |     |     |     | WD        | WD                |
| <b>A*02:113N total</b>                                  | <b>02:113N total</b> |          |                                               | <b>0</b> | <b>0</b> | <b>4</b>  | <b>0</b> | <b>0</b> | <b>0</b> | <b>2</b> | <b>6</b>  |     |                                                      |           |      |     |     |     | <b>WD</b> | <b>WD</b>         |
| A*02:113N                                               | 02:113N              |          |                                               | 0        | 0        | 1         | 0        | 0        | 0        | 0        | 1         |     |                                                      |           |      |     |     |     |           |                   |
| A*02:113:01N                                            | 02:113:01N           | HLA02867 |                                               | 0        | 0        | 2         | 0        | 0        | 0        | 2        | 4         |     |                                                      |           |      |     |     |     |           |                   |
| A*02:113:02N                                            | 02:113:02N           | HLA12434 |                                               | 0        | 0        | 1         | 0        | 0        | 0        | 0        | 1         |     |                                                      |           |      |     |     |     |           |                   |
| A*02:114                                                | 02:114               | HLA02896 |                                               | 0        | 0        | 3         | 1        | 0        | 0        | 1        | 5         |     |                                                      |           |      |     |     |     | WD        | WD                |
| A*02:115                                                | 02:115               | HLA02899 |                                               | 3        | 0        | 0         | 0        | 0        | 0        | 0        | 3         |     |                                                      |           |      |     |     |     |           |                   |
| A*02:116                                                | 02:116               | HLA02901 |                                               | 0        | 1        | 1         | 1        | 0        | 0        | 0        | 3         |     |                                                      |           |      |     |     |     |           |                   |
| A*02:118                                                | 02:118               | HLA02935 |                                               | 0        | 0        | 8         | 0        | 0        | 0        | 2        | 10        |     |                                                      | WD        |      |     |     |     | WD        | WD                |
| A*02:119                                                | 02:119               | HLA02936 |                                               | 0        | 0        | 37        | 0        | 0        | 0        | 4        | 41        |     |                                                      | WD        |      |     |     |     | WD        | WD                |
| A*02:120                                                | 02:120               | HLA02937 |                                               | 0        | 0        | 8         | 0        | 0        | 0        | 0        | 8         |     |                                                      | WD        |      |     |     |     | WD        | WD                |
| A*02:121                                                | 02:121               | HLA02953 |                                               | 1        | 0        | 15        | 1        | 0        | 0        | 4        | 21        |     |                                                      | WD        |      |     |     |     | WD        | WD                |
| A*02:122                                                | 02:122               | HLA02956 |                                               | 6        | 0        | 0         | 0        | 3        | 0        | 4        | 13        | WD  |                                                      |           |      |     |     |     | WD        | WD                |
| A*02:123                                                | 02:123               | HLA02957 |                                               | 0        | 0        | 74        | 0        | 1        | 0        | 8        | 83        |     |                                                      | WD        |      |     |     | WD  | WD        | WD                |
| A*02:125N                                               | 02:125N              | HLA02961 |                                               | 0        | 0        | 21        | 0        | 0        | 0        | 0        | 21        |     |                                                      | WD        |      |     |     |     | WD        | WD                |
| A*02:127                                                | 02:127               | HLA03021 |                                               | 0        | 1        | 0         | 0        | 0        | 0        | 0        | 1         |     |                                                      |           |      |     |     |     |           |                   |
| A*02:128                                                | 02:128               | HLA03022 |                                               | 0        | 6        | 0         | 0        | 0        | 0        | 0        | 6         |     | WD                                                   |           |      |     |     |     | WD        | WD                |

| Supplemental Table 8: HLA-A Allele Summary <sup>a</sup> |                     |          | Allele Count by Population Group <sup>b</sup> |          |          |           |          |          |          |          |           | 3.0.0 CIWD Category by Population Group <sup>c</sup> |     |           |      |     |     |     |           |                   |  |
|---------------------------------------------------------|---------------------|----------|-----------------------------------------------|----------|----------|-----------|----------|----------|----------|----------|-----------|------------------------------------------------------|-----|-----------|------|-----|-----|-----|-----------|-------------------|--|
| Allele                                                  | Genomic Typing      | AlleleID | G group                                       | AFA      | API      | EURO      | MENA     | HIS      | NAM      | UNK      | Total     | AFA                                                  | API | EURO      | MENA | HIS | NAM | UNK | Total     | Highest Frequency |  |
| A*02:133                                                | 02:133              | HLA03132 |                                               | 0        | 0        | 34        | 0        | 0        | 0        | 2        | 36        |                                                      |     | WD        |      |     |     |     | WD        | WD                |  |
| A*02:135                                                | 02:135              | HLA03145 |                                               | 0        | 0        | 20        | 1        | 0        | 0        | 1        | 22        |                                                      |     | WD        |      |     |     |     | WD        | WD                |  |
| A*02:136                                                | 02:136              | HLA03162 |                                               | 0        | 0        | 2         | 0        | 17       | 1        | 7        | 27        |                                                      |     |           |      | I   |     | WD  | WD        | I                 |  |
| A*02:137                                                | 02:137              | HLA03181 |                                               | 0        | 0        | 1         | 0        | 15       | 1        | 1        | 18        |                                                      |     |           |      | I   |     |     | WD        | I                 |  |
| A*02:138                                                | 02:138              | HLA03229 |                                               | 0        | 0        | 19        | 0        | 0        | 0        | 0        | 19        |                                                      |     | WD        |      |     |     |     | WD        | WD                |  |
| A*02:139                                                | 02:139              | HLA03235 |                                               | 0        | 0        | 20        | 0        | 0        | 0        | 0        | 20        |                                                      |     | WD        |      |     |     |     | WD        | WD                |  |
| A*02:141                                                | 02:141              | HLA03284 |                                               | 0        | 0        | 13        | 28       | 1        | 0        | 3        | 45        |                                                      |     | WD        | WD   |     |     |     | WD        | WD                |  |
| A*02:144                                                | 02:144              | HLA03306 |                                               | 0        | 0        | 0         | 0        | 0        | 0        | 1        | 1         |                                                      |     |           |      |     |     |     |           |                   |  |
| A*02:145                                                | 02:145              | HLA03326 |                                               | 0        | 0        | 1         | 0        | 0        | 0        | 1        | 2         |                                                      |     |           |      |     |     |     |           |                   |  |
| A*02:146                                                | 02:146              | HLA03330 |                                               | 0        | 0        | 1         | 2        | 0        | 0        | 0        | 3         |                                                      |     |           |      |     |     |     |           |                   |  |
| A*02:147                                                | 02:147              | HLA03346 |                                               | 0        | 0        | 1         | 0        | 20       | 0        | 3        | 24        |                                                      |     |           |      | I   |     |     | WD        | I                 |  |
| A*02:149                                                | 02:149              | HLA03421 |                                               | 0        | 0        | 8         | 0        | 0        | 0        | 1        | 9         |                                                      |     | WD        |      |     |     |     | WD        | WD                |  |
| A*02:150                                                | 02:150              | HLA03452 |                                               | 0        | 0        | 0         | 1        | 0        | 0        | 1        | 2         |                                                      |     |           |      |     |     |     |           |                   |  |
| A*02:151                                                | 02:151              | HLA03475 |                                               | 0        | 0        | 142       | 0        | 0        | 0        | 7        | 149       |                                                      |     | I         |      |     |     | WD  | WD        | I                 |  |
| A*02:152                                                | 02:152              | HLA03497 |                                               | 0        | 0        | 2         | 0        | 1        | 0        | 0        | 3         |                                                      |     |           |      |     |     |     |           |                   |  |
| <b>A*02:153 total</b>                                   | <b>02:153 total</b> |          |                                               | <b>0</b> | <b>0</b> | <b>4</b>  | <b>0</b> | <b>0</b> | <b>0</b> | <b>0</b> | <b>4</b>  |                                                      |     |           |      |     |     |     |           |                   |  |
| A*02:153                                                | 02:153              |          |                                               | 0        | 0        | 1         | 0        | 0        | 0        | 0        | 1         |                                                      |     |           |      |     |     |     |           |                   |  |
| A*02:153:01                                             | 02:153:01           | HLA03567 |                                               | 0        | 0        | 3         | 0        | 0        | 0        | 0        | 3         |                                                      |     |           |      |     |     |     |           |                   |  |
| A*02:154                                                | 02:154              | HLA03579 |                                               | 0        | 0        | 4         | 20       | 0        | 0        | 3        | 27        |                                                      |     |           | WD   |     |     |     | WD        | WD                |  |
| A*02:156                                                | 02:156              | HLA03582 |                                               | 0        | 0        | 20        | 0        | 0        | 0        | 0        | 20        |                                                      |     | WD        |      |     |     |     | WD        | WD                |  |
| <b>A*02:157 total</b>                                   | <b>02:157 total</b> |          |                                               | <b>0</b> | <b>0</b> | <b>7</b>  | <b>0</b> | <b>0</b> | <b>0</b> | <b>3</b> | <b>10</b> |                                                      |     | <b>WD</b> |      |     |     |     | <b>WD</b> | <b>WD</b>         |  |
| A*02:157                                                | 02:157              |          |                                               | 0        | 0        | 6         | 0        | 0        | 0        | 3        | 9         |                                                      |     | WD        |      |     |     |     | WD        | WD                |  |
| A*02:157:01                                             | 02:157:01           | HLA03629 |                                               | 0        | 0        | 1         | 0        | 0        | 0        | 0        | 1         |                                                      |     |           |      |     |     |     |           |                   |  |
| A*02:158                                                | 02:158              | HLA03652 |                                               | 0        | 0        | 107       | 0        | 4        | 0        | 2        | 113       |                                                      |     | WD        |      |     |     |     | WD        | WD                |  |
| A*02:159                                                | 02:159              | HLA03653 |                                               | 1        | 0        | 0         | 0        | 0        | 0        | 0        | 1         |                                                      |     |           |      |     |     |     |           |                   |  |
| A*02:160                                                | 02:160              | HLA03655 |                                               | 0        | 0        | 29        | 0        | 0        | 0        | 0        | 29        |                                                      |     | WD        |      |     |     |     | WD        | WD                |  |
| A*02:161                                                | 02:161              | HLA03657 |                                               | 0        | 0        | 0         | 11       | 0        | 0        | 0        | 11        |                                                      |     |           | WD   |     |     |     | WD        | WD                |  |
| A*02:162                                                | 02:162              | HLA03669 |                                               | 0        | 0        | 5         | 0        | 0        | 0        | 0        | 5         |                                                      |     | WD        |      |     |     |     | WD        | WD                |  |
| A*02:163                                                | 02:163              | HLA03670 |                                               | 0        | 0        | 38        | 0        | 1        | 0        | 1        | 40        |                                                      |     | WD        |      |     |     |     | WD        | WD                |  |
| <b>A*02:164 total</b>                                   | <b>02:164 total</b> |          |                                               | <b>0</b> | <b>0</b> | <b>21</b> | <b>0</b> | <b>0</b> | <b>0</b> | <b>0</b> | <b>21</b> |                                                      |     | <b>WD</b> |      |     |     |     | <b>WD</b> | <b>WD</b>         |  |

| Supplemental Table 8: HLA-A Allele Summary <sup>a</sup> |                     |          | Allele Count by Population Group <sup>b</sup> |          |          |           |          |          |          |          |           | 3.0.0 CIWD Category by Population Group <sup>c</sup> |     |           |      |     |     |     |           |                   |  |
|---------------------------------------------------------|---------------------|----------|-----------------------------------------------|----------|----------|-----------|----------|----------|----------|----------|-----------|------------------------------------------------------|-----|-----------|------|-----|-----|-----|-----------|-------------------|--|
| Allele                                                  | Genomic Typing      | AlleleID | G group                                       | AFA      | API      | EURO      | MENA     | HIS      | NAM      | UNK      | Total     | AFA                                                  | API | EURO      | MENA | HIS | NAM | UNK | Total     | Highest Frequency |  |
| A*02:164                                                | 02:164              |          |                                               | 0        | 0        | 19        | 0        | 0        | 0        | 0        | 19        |                                                      |     | WD        |      |     |     |     | WD        | WD                |  |
| A*02:164:01                                             | 02:164:01           | HLA03671 |                                               | 0        | 0        | 2         | 0        | 0        | 0        | 0        | 2         |                                                      |     |           |      |     |     |     |           |                   |  |
| A*02:165                                                | 02:165              | HLA03672 |                                               | 0        | 0        | 5         | 0        | 0        | 0        | 0        | 5         |                                                      |     | WD        |      |     |     |     | WD        | WD                |  |
| A*02:166                                                | 02:166              | HLA03673 |                                               | 0        | 0        | 12        | 0        | 1        | 0        | 0        | 13        |                                                      |     | WD        |      |     |     |     | WD        | WD                |  |
| <b>A*02:171 total</b>                                   | <b>02:171 total</b> |          |                                               | <b>0</b> | <b>1</b> | <b>0</b>  | <b>0</b> | <b>0</b> | <b>0</b> | <b>0</b> | <b>1</b>  |                                                      |     |           |      |     |     |     |           |                   |  |
| A*02:171:02                                             | 02:171:02           | HLA04646 |                                               | 0        | 1        | 0         | 0        | 0        | 0        | 0        | 1         |                                                      |     |           |      |     |     |     |           |                   |  |
| A*02:172                                                | 02:172              | HLA03784 |                                               | 0        | 0        | 9         | 0        | 0        | 0        | 0        | 9         |                                                      |     | WD        |      |     |     |     | WD        | WD                |  |
| A*02:173                                                | 02:173              | HLA03785 |                                               | 0        | 0        | 5         | 0        | 0        | 0        | 0        | 5         |                                                      |     | WD        |      |     |     |     | WD        | WD                |  |
| A*02:174                                                | 02:174              | HLA03786 |                                               | 0        | 0        | 4         | 0        | 0        | 0        | 1        | 5         |                                                      |     |           |      |     |     |     | WD        | WD                |  |
| A*02:176                                                | 02:176              | HLA03795 |                                               | 0        | 0        | 3         | 0        | 0        | 0        | 0        | 3         |                                                      |     |           |      |     |     |     |           |                   |  |
| A*02:177                                                | 02:177              | HLA03815 |                                               | 14       | 0        | 3         | 0        | 0        | 4        | 2        | 23        | WD                                                   |     |           |      |     |     |     | WD        | WD                |  |
| A*02:180                                                | 02:180              | HLA03880 |                                               | 0        | 1        | 16        | 0        | 0        | 0        | 1        | 18        |                                                      |     | WD        |      |     |     |     | WD        | WD                |  |
| A*02:182                                                | 02:182              | HLA03886 |                                               | 0        | 0        | 13        | 0        | 0        | 0        | 0        | 13        |                                                      |     | WD        |      |     |     |     | WD        | WD                |  |
| A*02:183                                                | 02:183              | HLA03892 |                                               | 2        | 0        | 26        | 1        | 1        | 1        | 8        | 39        |                                                      |     | WD        |      |     |     | WD  | WD        | WD                |  |
| A*02:185                                                | 02:185              | HLA03895 |                                               | 0        | 0        | 2         | 0        | 0        | 0        | 0        | 2         |                                                      |     |           |      |     |     |     |           |                   |  |
| A*02:186                                                | 02:186              | HLA03932 |                                               | 9        | 0        | 0         | 0        | 0        | 0        | 2        | 11        | WD                                                   |     |           |      |     |     |     | WD        | WD                |  |
| A*02:187                                                | 02:187              | HLA04063 |                                               | 2        | 0        | 0         | 0        | 0        | 0        | 0        | 2         |                                                      |     |           |      |     |     |     |           |                   |  |
| A*02:188                                                | 02:188              | HLA04064 |                                               | 0        | 0        | 42        | 0        | 0        | 0        | 0        | 42        |                                                      |     | WD        |      |     |     |     | WD        | WD                |  |
| A*02:189                                                | 02:189              | HLA04065 |                                               | 0        | 0        | 13        | 0        | 0        | 0        | 0        | 13        |                                                      |     | WD        |      |     |     |     | WD        | WD                |  |
| A*02:190                                                | 02:190              | HLA03996 |                                               | 1        | 0        | 12        | 0        | 0        | 0        | 1        | 14        |                                                      |     | WD        |      |     |     |     | WD        | WD                |  |
| A*02:192                                                | 02:192              | HLA04120 |                                               | 0        | 0        | 3         | 0        | 0        | 0        | 0        | 3         |                                                      |     |           |      |     |     |     |           |                   |  |
| A*02:193                                                | 02:193              | HLA04121 |                                               | 2        | 0        | 0         | 0        | 0        | 0        | 1        | 3         |                                                      |     |           |      |     |     |     |           |                   |  |
| A*02:194                                                | 02:194              | HLA04149 |                                               | 0        | 0        | 27        | 0        | 0        | 0        | 1        | 28        |                                                      |     | WD        |      |     |     |     | WD        | WD                |  |
| A*02:195                                                | 02:195              | HLA04152 |                                               | 0        | 0        | 5         | 0        | 0        | 0        | 0        | 5         |                                                      |     | WD        |      |     |     |     | WD        | WD                |  |
| A*02:196                                                | 02:196              | HLA04420 |                                               | 0        | 0        | 1         | 0        | 0        | 0        | 0        | 1         |                                                      |     |           |      |     |     |     |           |                   |  |
| <b>A*02:197 total</b>                                   | <b>02:197 total</b> |          |                                               | <b>0</b> | <b>0</b> | <b>10</b> | <b>0</b> | <b>1</b> | <b>1</b> | <b>1</b> | <b>13</b> |                                                      |     | <b>WD</b> |      |     |     |     | <b>WD</b> | <b>WD</b>         |  |
| A*02:197                                                | 02:197              |          |                                               | 0        | 0        | 10        | 0        | 1        | 1        | 1        | 13        |                                                      |     | WD        |      |     |     |     | WD        | WD                |  |
| A*02:198                                                | 02:198              | HLA04424 |                                               | 0        | 0        | 6         | 0        | 0        | 0        | 0        | 6         |                                                      |     | WD        |      |     |     |     | WD        | WD                |  |
| A*02:199                                                | 02:199              | HLA04430 |                                               | 0        | 0        | 14        | 0        | 0        | 0        | 1        | 15        |                                                      |     | WD        |      |     |     |     | WD        | WD                |  |
| A*02:200                                                | 02:200              | HLA04928 |                                               | 2        | 0        | 0         | 0        | 0        | 0        | 1        | 3         |                                                      |     |           |      |     |     |     |           |                   |  |

| Supplemental Table 8: HLA-A Allele Summary <sup>a</sup> |                     |          | Allele Count by Population Group <sup>b</sup> |          |          |           |          |           |          |          |           | 3.0.0 CIWD Category by Population Group <sup>c</sup> |     |           |      |          |     |     |           |                   |  |
|---------------------------------------------------------|---------------------|----------|-----------------------------------------------|----------|----------|-----------|----------|-----------|----------|----------|-----------|------------------------------------------------------|-----|-----------|------|----------|-----|-----|-----------|-------------------|--|
| Allele                                                  | Genomic Typing      | AlleleID | G group                                       | AFA      | API      | EURO      | MENA     | HIS       | NAM      | UNK      | Total     | AFA                                                  | API | EURO      | MENA | HIS      | NAM | UNK | Total     | Highest Frequency |  |
| A*02:201                                                | 02:201              | HLA04943 |                                               | 0        | 0        | 1         | 0        | 0         | 0        | 0        | 1         |                                                      |     |           |      |          |     |     |           |                   |  |
| A*02:202                                                | 02:202              | HLA04944 |                                               | 0        | 0        | 3         | 1        | 0         | 0        | 0        | 4         |                                                      |     |           |      |          |     |     |           |                   |  |
| A*02:203                                                | 02:203              | HLA04945 |                                               | 0        | 0        | 6         | 0        | 1         | 0        | 0        | 7         |                                                      |     | WD        |      |          |     |     | WD        | WD                |  |
| A*02:204                                                | 02:204              | HLA04948 |                                               | 0        | 0        | 1         | 0        | 0         | 0        | 0        | 1         |                                                      |     |           |      |          |     |     |           |                   |  |
| A*02:205                                                | 02:205              | HLA04949 |                                               | 0        | 0        | 12        | 0        | 0         | 0        | 1        | 13        |                                                      |     | WD        |      |          |     |     | WD        | WD                |  |
| A*02:206                                                | 02:206              | HLA04951 |                                               | 0        | 0        | 22        | 0        | 0         | 0        | 2        | 24        |                                                      |     | WD        |      |          |     |     | WD        | WD                |  |
| A*02:209                                                | 02:209              | HLA04968 |                                               | 0        | 0        | 3         | 2        | 0         | 0        | 1        | 6         |                                                      |     |           |      |          |     |     | WD        | WD                |  |
| A*02:210                                                | 02:210              | HLA04969 |                                               | 0        | 0        | 8         | 0        | 0         | 0        | 0        | 8         |                                                      |     | WD        |      |          |     |     | WD        | WD                |  |
| <b>A*02:211 total</b>                                   | <b>02:211 total</b> |          |                                               | <b>2</b> | <b>1</b> | <b>16</b> | <b>0</b> | <b>24</b> | <b>2</b> | <b>4</b> | <b>49</b> |                                                      |     | <b>WD</b> |      | <b>I</b> |     |     | <b>WD</b> | <b>I</b>          |  |
| A*02:211                                                | 02:211              |          |                                               | 1        | 1        | 3         | 0        | 4         | 2        | 1        | 12        |                                                      |     |           |      |          |     |     | WD        | WD                |  |
| A*02:211:01                                             | 02:211:01           | HLA04970 |                                               | 1        | 0        | 13        | 0        | 20        | 0        | 3        | 37        |                                                      |     | WD        |      | <b>I</b> |     |     | WD        | <b>I</b>          |  |
| A*02:212                                                | 02:212              | HLA04971 |                                               | 0        | 0        | 10        | 0        | 0         | 0        | 0        | 10        |                                                      |     | WD        |      |          |     |     | WD        | WD                |  |
| A*02:213                                                | 02:213              | HLA04972 |                                               | 0        | 0        | 4         | 0        | 0         | 0        | 0        | 4         |                                                      |     |           |      |          |     |     |           |                   |  |
| A*02:214                                                | 02:214              | HLA04973 |                                               | 0        | 0        | 2         | 0        | 0         | 0        | 2        | 4         |                                                      |     |           |      |          |     |     |           |                   |  |
| A*02:215                                                | 02:215              | HLA04975 |                                               | 0        | 0        | 1         | 0        | 0         | 0        | 0        | 1         |                                                      |     |           |      |          |     |     |           |                   |  |
| A*02:216                                                | 02:216              | HLA04976 |                                               | 1        | 0        | 0         | 0        | 0         | 0        | 0        | 1         |                                                      |     |           |      |          |     |     |           |                   |  |
| <b>A*02:217 total</b>                                   | <b>02:217 total</b> |          |                                               | <b>0</b> | <b>0</b> | <b>18</b> | <b>0</b> | <b>0</b>  | <b>0</b> | <b>1</b> | <b>19</b> |                                                      |     | <b>WD</b> |      |          |     |     | <b>WD</b> | <b>WD</b>         |  |
| A*02:217                                                | 02:217              |          |                                               | 0        | 0        | 2         | 0        | 0         | 0        | 0        | 2         |                                                      |     |           |      |          |     |     |           |                   |  |
| A*02:217:01                                             | 02:217:01           | HLA04984 |                                               | 0        | 0        | 9         | 0        | 0         | 0        | 0        | 9         |                                                      |     | WD        |      |          |     |     | WD        | WD                |  |
| A*02:217:02                                             | 02:217:02           | HLA06526 |                                               | 0        | 0        | 7         | 0        | 0         | 0        | 1        | 8         |                                                      |     | WD        |      |          |     |     | WD        | WD                |  |
| A*02:218                                                | 02:218              | HLA04985 |                                               | 0        | 0        | 7         | 0        | 0         | 0        | 0        | 7         |                                                      |     | WD        |      |          |     |     | WD        | WD                |  |
| A*02:219                                                | 02:219              | HLA04986 |                                               | 0        | 1        | 0         | 0        | 0         | 0        | 0        | 1         |                                                      |     |           |      |          |     |     |           |                   |  |
| A*02:220                                                | 02:220              | HLA04987 |                                               | 0        | 0        | 2         | 0        | 0         | 0        | 0        | 2         |                                                      |     |           |      |          |     |     |           |                   |  |
| A*02:221                                                | 02:221              | HLA04989 |                                               | 0        | 0        | 29        | 1        | 2         | 0        | 4        | 36        |                                                      |     | WD        |      |          |     |     | WD        | WD                |  |
| A*02:223N                                               | 02:223N             | HLA04991 |                                               | 0        | 0        | 3         | 0        | 0         | 0        | 0        | 3         |                                                      |     |           |      |          |     |     |           |                   |  |
| A*02:224                                                | 02:224              | HLA05001 |                                               | 0        | 0        | 1         | 0        | 0         | 0        | 0        | 1         |                                                      |     |           |      |          |     |     |           |                   |  |
| A*02:227N                                               | 02:227N             | HLA05004 |                                               | 0        | 1        | 18        | 0        | 0         | 0        | 0        | 19        |                                                      |     | WD        |      |          |     |     | WD        | WD                |  |
| A*02:228                                                | 02:228              | HLA05005 |                                               | 0        | 0        | 1         | 0        | 0         | 0        | 0        | 1         |                                                      |     |           |      |          |     |     |           |                   |  |
| A*02:229                                                | 02:229              | HLA05020 |                                               | 0        | 0        | 1         | 0        | 0         | 0        | 0        | 1         |                                                      |     |           |      |          |     |     |           |                   |  |
| A*02:231                                                | 02:231              | HLA05037 |                                               | 0        | 3        | 0         | 0        | 0         | 0        | 0        | 3         |                                                      |     |           |      |          |     |     |           |                   |  |

| Supplemental Table 8: HLA-A Allele Summary <sup>a</sup> |                     |          | Allele Count by Population Group <sup>b</sup> |          |          |           |          |          |          |          |           | 3.0.0 CIWD Category by Population Group <sup>c</sup> |           |           |      |     |     |     |           |                   |  |
|---------------------------------------------------------|---------------------|----------|-----------------------------------------------|----------|----------|-----------|----------|----------|----------|----------|-----------|------------------------------------------------------|-----------|-----------|------|-----|-----|-----|-----------|-------------------|--|
| Allele                                                  | Genomic Typing      | AlleleID | G group                                       | AFA      | API      | EURO      | MENA     | HIS      | NAM      | UNK      | Total     | AFA                                                  | API       | EURO      | MENA | HIS | NAM | UNK | Total     | Highest Frequency |  |
| A*02:232                                                | 02:232              | HLA05038 |                                               | 0        | 0        | 1         | 0        | 0        | 0        | 0        | 1         |                                                      |           |           |      |     |     |     |           |                   |  |
| A*02:233                                                | 02:233              | HLA05039 |                                               | 0        | 0        | 1         | 0        | 0        | 0        | 0        | 1         |                                                      |           |           |      |     |     |     |           |                   |  |
| A*02:235                                                | 02:235              | HLA05041 |                                               | 0        | 0        | 8         | 0        | 0        | 0        | 0        | 8         |                                                      |           | WD        |      |     |     |     | WD        | WD                |  |
| A*02:236                                                | 02:236              | HLA05042 |                                               | 0        | 0        | 5         | 0        | 0        | 0        | 0        | 5         |                                                      |           | WD        |      |     |     |     | WD        | WD                |  |
| A*02:237                                                | 02:237              | HLA05043 |                                               | 0        | 0        | 6         | 0        | 0        | 0        | 0        | 6         |                                                      |           | WD        |      |     |     |     | WD        | WD                |  |
| A*02:238                                                | 02:238              | HLA05044 |                                               | 0        | 0        | 3         | 0        | 0        | 0        | 0        | 3         |                                                      |           |           |      |     |     |     |           |                   |  |
| <b>A*02:243 total</b>                                   | <b>02:243 total</b> |          |                                               | <b>0</b> | <b>1</b> | <b>0</b>  | <b>0</b> | <b>0</b> | <b>0</b> | <b>0</b> | <b>1</b>  |                                                      |           |           |      |     |     |     |           |                   |  |
| A*02:243:01                                             | 02:243:01           | HLA04893 |                                               | 0        | 1        | 0         | 0        | 0        | 0        | 0        | 1         |                                                      |           |           |      |     |     |     |           |                   |  |
| A*02:245                                                | 02:245              | HLA05078 |                                               | 0        | 0        | 15        | 0        | 0        | 0        | 0        | 15        |                                                      |           | WD        |      |     |     |     | WD        | WD                |  |
| A*02:246                                                | 02:246              | HLA05087 |                                               | 0        | 0        | 8         | 2        | 0        | 0        | 5        | 15        |                                                      |           | WD        |      |     |     | WD  | WD        | WD                |  |
| A*02:249                                                | 02:249              | HLA05225 |                                               | 0        | 1        | 0         | 0        | 0        | 0        | 0        | 1         |                                                      |           |           |      |     |     |     |           |                   |  |
| A*02:250N                                               | 02:250N             | HLA05226 |                                               | 0        | 0        | 2         | 0        | 0        | 0        | 0        | 2         |                                                      |           |           |      |     |     |     |           |                   |  |
| A*02:251                                                | 02:251              | HLA05227 |                                               | 0        | 1        | 0         | 0        | 0        | 0        | 0        | 1         |                                                      |           |           |      |     |     |     |           |                   |  |
| A*02:254                                                | 02:254              | HLA05245 |                                               | 0        | 0        | 1         | 0        | 0        | 0        | 0        | 1         |                                                      |           |           |      |     |     |     |           |                   |  |
| A*02:257                                                | 02:257              | HLA05307 |                                               | 0        | 0        | 1         | 0        | 0        | 0        | 0        | 1         |                                                      |           |           |      |     |     |     |           |                   |  |
| A*02:259                                                | 02:259              | HLA05368 |                                               | 0        | 1        | 0         | 0        | 0        | 0        | 0        | 1         |                                                      |           |           |      |     |     |     |           |                   |  |
| A*02:261                                                | 02:261              | HLA05375 |                                               | 0        | 1        | 0         | 0        | 0        | 0        | 0        | 1         |                                                      |           |           |      |     |     |     |           |                   |  |
| A*02:262                                                | 02:262              | HLA05384 |                                               | 0        | 0        | 1         | 0        | 0        | 0        | 3        | 4         |                                                      |           |           |      |     |     |     |           |                   |  |
| A*02:263                                                | 02:263              | HLA05399 |                                               | 0        | 0        | 4         | 0        | 1        | 0        | 0        | 5         |                                                      |           |           |      |     |     |     | WD        | WD                |  |
| A*02:268                                                | 02:268              | HLA05532 |                                               | 0        | 0        | 4         | 0        | 0        | 0        | 0        | 4         |                                                      |           |           |      |     |     |     |           |                   |  |
| A*02:269                                                | 02:269              | HLA05542 |                                               | 0        | 0        | 1         | 0        | 0        | 0        | 0        | 1         |                                                      |           |           |      |     |     |     |           |                   |  |
| A*02:270                                                | 02:270              | HLA05549 |                                               | 0        | 0        | 2         | 1        | 0        | 0        | 0        | 3         |                                                      |           |           |      |     |     |     |           |                   |  |
| A*02:273                                                | 02:273              | HLA05676 |                                               | 0        | 2        | 5         | 0        | 0        | 0        | 0        | 7         |                                                      |           | WD        |      |     |     |     | WD        | WD                |  |
| A*02:277                                                | 02:277              | HLA05696 |                                               | 0        | 0        | 5         | 0        | 1        | 0        | 0        | 6         |                                                      |           | WD        |      |     |     |     | WD        | WD                |  |
| A*02:278                                                | 02:278              | HLA05697 |                                               | 0        | 0        | 0         | 0        | 5        | 0        | 0        | 5         |                                                      |           |           |      | WD  |     |     | WD        | WD                |  |
| A*02:280                                                | 02:280              | HLA05895 |                                               | 0        | 1        | 0         | 0        | 0        | 0        | 0        | 1         |                                                      |           |           |      |     |     |     |           |                   |  |
| A*02:281                                                | 02:281              | HLA05896 |                                               | 0        | 2        | 0         | 0        | 0        | 0        | 0        | 2         |                                                      |           |           |      |     |     |     |           |                   |  |
| A*02:283                                                | 02:283              | HLA05948 |                                               | 0        | 0        | 26        | 0        | 0        | 0        | 4        | 30        |                                                      |           | WD        |      |     |     |     | WD        | WD                |  |
| A*02:286                                                | 02:286              | HLA06008 |                                               | 0        | 1        | 0         | 3        | 0        | 0        | 0        | 4         |                                                      |           |           |      |     |     |     |           |                   |  |
| <b>A*02:289 total</b>                                   | <b>02:289 total</b> |          |                                               | <b>1</b> | <b>5</b> | <b>10</b> | <b>0</b> | <b>0</b> | <b>0</b> | <b>0</b> | <b>16</b> |                                                      | <b>WD</b> | <b>WD</b> |      |     |     |     | <b>WD</b> | <b>WD</b>         |  |

| Supplemental Table 8: HLA-A Allele Summary <sup>a</sup> |                |          | Allele Count by Population Group <sup>b</sup> |     |     |      |      |     |     |     |       | 3.0.0 CIWD Category by Population Group <sup>c</sup> |     |      |      |     |     |     |       |                   |
|---------------------------------------------------------|----------------|----------|-----------------------------------------------|-----|-----|------|------|-----|-----|-----|-------|------------------------------------------------------|-----|------|------|-----|-----|-----|-------|-------------------|
| Allele                                                  | Genomic Typing | AlleleID | G group                                       | AFA | API | EURO | MENA | HIS | NAM | UNK | Total | AFA                                                  | API | EURO | MENA | HIS | NAM | UNK | Total | Highest Frequency |
| A*02:289                                                | 02:289         |          |                                               | 1   | 2   | 5    | 0    | 0   | 0   | 0   | 8     |                                                      |     | WD   |      |     |     |     | WD    | WD                |
| A*02:289:01                                             | 02:289:01      | HLA06017 |                                               | 0   | 3   | 5    | 0    | 0   | 0   | 0   | 8     |                                                      |     | WD   |      |     |     |     | WD    | WD                |
| A*02:292                                                | 02:292         | HLA06079 |                                               | 0   | 0   | 1    | 0    | 0   | 0   | 0   | 1     |                                                      |     |      |      |     |     |     |       |                   |
| A*02:293Q                                               | 02:293Q        | HLA06080 |                                               | 0   | 1   | 0    | 0    | 0   | 0   | 0   | 1     |                                                      |     |      |      |     |     |     |       |                   |
| A*02:296                                                | 02:296         | HLA06088 |                                               | 0   | 0   | 3    | 0    | 0   | 0   | 0   | 3     |                                                      |     |      |      |     |     |     |       |                   |
| A*02:297                                                | 02:297         | HLA06092 |                                               | 0   | 3   | 0    | 0    | 0   | 0   | 0   | 3     |                                                      |     |      |      |     |     |     |       |                   |
| A*02:298                                                | 02:298         | HLA06099 |                                               | 0   | 1   | 0    | 0    | 0   | 0   | 0   | 1     |                                                      |     |      |      |     |     |     |       |                   |
| A*02:299                                                | 02:299         | HLA06106 |                                               | 0   | 0   | 34   | 1    | 0   | 0   | 0   | 35    |                                                      |     | WD   |      |     |     |     | WD    | WD                |
| A*02:302                                                | 02:302         | HLA06336 |                                               | 0   | 0   | 0    | 0    | 0   | 0   | 1   | 1     |                                                      |     |      |      |     |     |     |       |                   |
| A*02:306                                                | 02:306         | HLA06564 |                                               | 2   | 0   | 5    | 0    | 0   | 0   | 1   | 8     |                                                      |     | WD   |      |     |     |     | WD    | WD                |
| A*02:307                                                | 02:307         | HLA06565 |                                               | 0   | 0   | 2    | 0    | 0   | 0   | 0   | 2     |                                                      |     |      |      |     |     |     |       |                   |
| A*02:309                                                | 02:309         | HLA06572 |                                               | 0   | 0   | 1    | 0    | 0   | 0   | 0   | 1     |                                                      |     |      |      |     |     |     |       |                   |
| A*02:312                                                | 02:312         | HLA06747 |                                               | 0   | 0   | 4    | 0    | 0   | 0   | 2   | 6     |                                                      |     |      |      |     |     |     | WD    | WD                |
| A*02:313                                                | 02:313         | HLA06758 |                                               | 0   | 0   | 3    | 0    | 0   | 0   | 0   | 3     |                                                      |     |      |      |     |     |     |       |                   |
| A*02:315                                                | 02:315         | HLA06760 |                                               | 0   | 1   | 0    | 0    | 0   | 0   | 0   | 1     |                                                      |     |      |      |     |     |     |       |                   |
| A*02:316                                                | 02:316         | HLA06767 |                                               | 0   | 0   | 0    | 0    | 0   | 0   | 1   | 1     |                                                      |     |      |      |     |     |     |       |                   |
| A*02:317                                                | 02:317         | HLA06792 |                                               | 0   | 0   | 1    | 0    | 0   | 0   | 0   | 1     |                                                      |     |      |      |     |     |     |       |                   |
| A*02:320                                                | 02:320         | HLA06832 |                                               | 0   | 0   | 0    | 0    | 0   | 0   | 1   | 1     |                                                      |     |      |      |     |     |     |       |                   |
| A*02:325                                                | 02:325         | HLA06912 |                                               | 0   | 0   | 5    | 0    | 0   | 0   | 0   | 5     |                                                      |     | WD   |      |     |     |     | WD    | WD                |
| A*02:326                                                | 02:326         | HLA06913 |                                               | 0   | 0   | 8    | 0    | 0   | 0   | 1   | 9     |                                                      |     | WD   |      |     |     |     | WD    | WD                |
| A*02:331                                                | 02:331         | HLA07291 |                                               | 0   | 2   | 0    | 0    | 0   | 0   | 0   | 2     |                                                      |     |      |      |     |     |     |       |                   |
| A*02:332                                                | 02:332         | HLA07292 |                                               | 0   | 0   | 7    | 0    | 0   | 0   | 0   | 7     |                                                      |     | WD   |      |     |     |     | WD    | WD                |
| A*02:334                                                | 02:334         | HLA07342 |                                               | 0   | 0   | 0    | 0    | 1   | 0   | 0   | 1     |                                                      |     |      |      |     |     |     |       |                   |
| A*02:336                                                | 02:336         | HLA07387 |                                               | 0   | 0   | 0    | 0    | 1   | 0   | 0   | 1     |                                                      |     |      |      |     |     |     |       |                   |
| A*02:337                                                | 02:337         | HLA07430 |                                               | 0   | 0   | 2    | 0    | 0   | 0   | 0   | 2     |                                                      |     |      |      |     |     |     |       |                   |
| A*02:338                                                | 02:338         | HLA07431 |                                               | 0   | 0   | 11   | 0    | 1   | 0   | 3   | 15    |                                                      |     | WD   |      |     |     |     | WD    | WD                |
| A*02:339                                                | 02:339         | HLA07432 |                                               | 0   | 0   | 2    | 0    | 0   | 0   | 0   | 2     |                                                      |     |      |      |     |     |     |       |                   |
| A*02:340                                                | 02:340         | HLA07433 |                                               | 0   | 0   | 1    | 0    | 0   | 0   | 0   | 1     |                                                      |     |      |      |     |     |     |       |                   |
| A*02:341                                                | 02:341         | HLA07434 |                                               | 0   | 0   | 0    | 0    | 0   | 0   | 1   | 1     |                                                      |     |      |      |     |     |     |       |                   |
| A*02:342                                                | 02:342         | HLA07435 |                                               | 0   | 0   | 13   | 0    | 0   | 0   | 0   | 13    |                                                      |     | WD   |      |     |     |     | WD    | WD                |



| Supplemental Table 8: HLA-A Allele Summary <sup>a</sup> |                |          | Allele Count by Population Group <sup>b</sup> |     |     |      |      |     |     |     |       | 3.0.0 CIWD Category by Population Group <sup>c</sup> |     |      |      |     |     |     |       |                   |  |
|---------------------------------------------------------|----------------|----------|-----------------------------------------------|-----|-----|------|------|-----|-----|-----|-------|------------------------------------------------------|-----|------|------|-----|-----|-----|-------|-------------------|--|
| Allele                                                  | Genomic Typing | AlleleID | G group                                       | AFA | API | EURO | MENA | HIS | NAM | UNK | Total | AFA                                                  | API | EURO | MENA | HIS | NAM | UNK | Total | Highest Frequency |  |
| A*02:343                                                | 02:343         | HLA07437 |                                               | 0   | 4   | 6    | 0    | 0   | 0   | 0   | 10    |                                                      |     | WD   |      |     |     |     | WD    | WD                |  |
| A*02:344                                                | 02:344         | HLA07607 |                                               | 0   | 2   | 0    | 1    | 0   | 0   | 0   | 3     |                                                      |     |      |      |     |     |     |       |                   |  |
| A*02:345                                                | 02:345         | HLA07611 |                                               | 0   | 1   | 0    | 0    | 0   | 0   | 0   | 1     |                                                      |     |      |      |     |     |     |       |                   |  |
| A*02:346                                                | 02:346         | HLA07612 |                                               | 0   | 0   | 7    | 0    | 0   | 0   | 0   | 7     |                                                      |     | WD   |      |     |     |     | WD    | WD                |  |
| A*02:347                                                | 02:347         | HLA07613 |                                               | 0   | 0   | 1    | 0    | 0   | 0   | 0   | 1     |                                                      |     |      |      |     |     |     |       |                   |  |
| A*02:350N                                               | 02:350N        | HLA07619 |                                               | 0   | 0   | 3    | 0    | 0   | 0   | 0   | 3     |                                                      |     |      |      |     |     |     |       |                   |  |
| A*02:352                                                | 02:352         | HLA07622 |                                               | 2   | 0   | 1    | 0    | 0   | 0   | 0   | 3     |                                                      |     |      |      |     |     |     |       |                   |  |
| A*02:353                                                | 02:353         | HLA07677 |                                               | 0   | 0   | 1    | 0    | 0   | 0   | 0   | 1     |                                                      |     |      |      |     |     |     |       |                   |  |
| A*02:354                                                | 02:354         | HLA07678 |                                               | 0   | 0   | 0    | 0    | 1   | 0   | 0   | 1     |                                                      |     |      |      |     |     |     |       |                   |  |
| A*02:355                                                | 02:355         | HLA07747 |                                               | 0   | 0   | 0    | 1    | 0   | 0   | 0   | 1     |                                                      |     |      |      |     |     |     |       |                   |  |
| A*02:359                                                | 02:359         | HLA08002 |                                               | 0   | 0   | 4    | 0    | 0   | 0   | 3   | 7     |                                                      |     |      |      |     |     |     | WD    | WD                |  |
| A*02:362                                                | 02:362         | HLA08009 |                                               | 0   | 0   | 1    | 0    | 0   | 0   | 0   | 1     |                                                      |     |      |      |     |     |     |       |                   |  |
| A*02:364                                                | 02:364         | HLA08011 |                                               | 0   | 0   | 1    | 0    | 0   | 0   | 0   | 1     |                                                      |     |      |      |     |     |     |       |                   |  |
| A*02:366N                                               | 02:366N        | HLA08013 |                                               | 0   | 0   | 1    | 0    | 0   | 0   | 0   | 1     |                                                      |     |      |      |     |     |     |       |                   |  |
| A*02:367                                                | 02:367         | HLA08016 |                                               | 0   | 0   | 15   | 0    | 0   | 0   | 0   | 15    |                                                      |     | WD   |      |     |     |     | WD    | WD                |  |
| A*02:368                                                | 02:368         | HLA08018 |                                               | 0   | 0   | 0    | 0    | 0   | 0   | 1   | 1     |                                                      |     |      |      |     |     |     |       |                   |  |
| A*02:372                                                | 02:372         | HLA08096 |                                               | 0   | 0   | 2    | 0    | 0   | 0   | 0   | 2     |                                                      |     |      |      |     |     |     |       |                   |  |
| A*02:374                                                | 02:374         | HLA08303 |                                               | 0   | 0   | 1    | 0    | 0   | 0   | 0   | 1     |                                                      |     |      |      |     |     |     |       |                   |  |
| A*02:377                                                | 02:377         | HLA08462 |                                               | 0   | 0   | 2    | 0    | 0   | 0   | 0   | 2     |                                                      |     |      |      |     |     |     |       |                   |  |
| A*02:379                                                | 02:379         | HLA08464 |                                               | 0   | 0   | 2    | 0    | 0   | 0   | 0   | 2     |                                                      |     |      |      |     |     |     |       |                   |  |
| A*02:380                                                | 02:380         | HLA08466 |                                               | 0   | 0   | 10   | 0    | 0   | 0   | 1   | 11    |                                                      |     | WD   |      |     |     |     | WD    | WD                |  |
| A*02:382                                                | 02:382         | HLA08493 |                                               | 0   | 0   | 0    | 7    | 0   | 0   | 0   | 7     |                                                      |     |      | WD   |     |     |     | WD    | WD                |  |
| A*02:384                                                | 02:384         | HLA08495 |                                               | 1   | 0   | 0    | 0    | 0   | 0   | 0   | 1     |                                                      |     |      |      |     |     |     |       |                   |  |
| A*02:386                                                | 02:386         | HLA08498 |                                               | 0   | 0   | 1    | 0    | 0   | 0   | 0   | 1     |                                                      |     |      |      |     |     |     |       |                   |  |
| A*02:389                                                | 02:389         | HLA08647 |                                               | 0   | 0   | 2    | 0    | 0   | 0   | 0   | 2     |                                                      |     |      |      |     |     |     |       |                   |  |
| A*02:390                                                | 02:390         | HLA08648 |                                               | 0   | 0   | 1    | 0    | 0   | 0   | 0   | 1     |                                                      |     |      |      |     |     |     |       |                   |  |
| A*02:392                                                | 02:392         | HLA08650 |                                               | 0   | 0   | 0    | 4    | 0   | 0   | 1   | 5     |                                                      |     |      |      |     |     |     | WD    | WD                |  |
| A*02:393                                                | 02:393         | HLA08883 |                                               | 0   | 0   | 7    | 0    | 0   | 0   | 0   | 7     |                                                      |     | WD   |      |     |     |     | WD    | WD                |  |
| A*02:394                                                | 02:394         | HLA08888 |                                               | 0   | 0   | 1    | 0    | 0   | 0   | 0   | 1     |                                                      |     |      |      |     |     |     |       |                   |  |
| A*02:398                                                | 02:398         | HLA08972 |                                               | 0   | 0   | 0    | 0    | 1   | 0   | 0   | 1     |                                                      |     |      |      |     |     |     |       |                   |  |

| Supplemental Table 8: HLA-A Allele Summary <sup>a</sup> |                     |          | Allele Count by Population Group <sup>b</sup> |          |          |          |          |          |          |          |          | 3.0.0 CIWD Category by Population Group <sup>c</sup> |     |      |      |     |     |     |       |                   |  |
|---------------------------------------------------------|---------------------|----------|-----------------------------------------------|----------|----------|----------|----------|----------|----------|----------|----------|------------------------------------------------------|-----|------|------|-----|-----|-----|-------|-------------------|--|
| Allele                                                  | Genomic Typing      | AlleleID | G group                                       | AFA      | API      | EURO     | MENA     | HIS      | NAM      | UNK      | Total    | AFA                                                  | API | EURO | MENA | HIS | NAM | UNK | Total | Highest Frequency |  |
| A*02:406                                                | 02:406              | HLA09125 |                                               | 0        | 0        | 2        | 0        | 0        | 0        | 0        | 2        |                                                      |     |      |      |     |     |     |       |                   |  |
| A*02:407                                                | 02:407              | HLA09126 |                                               | 0        | 0        | 3        | 0        | 1        | 0        | 0        | 4        |                                                      |     |      |      |     |     |     |       |                   |  |
| A*02:409                                                | 02:409              | HLA09163 |                                               | 0        | 1        | 1        | 0        | 0        | 0        | 0        | 2        |                                                      |     |      |      |     |     |     |       |                   |  |
| A*02:410                                                | 02:410              | HLA09164 |                                               | 1        | 0        | 0        | 0        | 0        | 0        | 0        | 1        |                                                      |     |      |      |     |     |     |       |                   |  |
| <b>A*02:419 total</b>                                   | <b>02:419 total</b> |          |                                               | <b>0</b> | <b>2</b> | <b>0</b> | <b>0</b> | <b>0</b> | <b>0</b> | <b>0</b> | <b>2</b> |                                                      |     |      |      |     |     |     |       |                   |  |
| A*02:419                                                | 02:419              |          |                                               | 0        | 2        | 0        | 0        | 0        | 0        | 0        | 2        |                                                      |     |      |      |     |     |     |       |                   |  |
| A*02:423                                                | 02:423              | HLA09551 |                                               | 0        | 8        | 1        | 0        | 0        | 0        | 0        | 9        |                                                      | WD  |      |      |     |     |     | WD    | WD                |  |
| A*02:429                                                | 02:429              | HLA09692 |                                               | 0        | 3        | 0        | 0        | 0        | 0        | 0        | 3        |                                                      |     |      |      |     |     |     |       |                   |  |
| A*02:430                                                | 02:430              | HLA09693 |                                               | 0        | 0        | 3        | 0        | 0        | 0        | 0        | 3        |                                                      |     |      |      |     |     |     |       |                   |  |
| A*02:431                                                | 02:431              | HLA09715 |                                               | 0        | 1        | 0        | 0        | 0        | 0        | 0        | 1        |                                                      |     |      |      |     |     |     |       |                   |  |
| A*02:433                                                | 02:433              | HLA09808 |                                               | 0        | 0        | 0        | 6        | 0        | 0        | 0        | 6        |                                                      |     |      | WD   |     |     |     | WD    | WD                |  |
| A*02:434                                                | 02:434              | HLA09809 |                                               | 0        | 0        | 0        | 6        | 0        | 0        | 0        | 6        |                                                      |     |      | WD   |     |     |     | WD    | WD                |  |
| A*02:435                                                | 02:435              | HLA09812 |                                               | 0        | 0        | 1        | 0        | 0        | 0        | 0        | 1        |                                                      |     |      |      |     |     |     |       |                   |  |
| A*02:436                                                | 02:436              | HLA09815 |                                               | 0        | 14       | 0        | 0        | 0        | 0        | 0        | 14       |                                                      | I   |      |      |     |     |     | WD    | I                 |  |
| A*02:461                                                | 02:461              | HLA10522 |                                               | 0        | 0        | 0        | 0        | 3        | 0        | 0        | 3        |                                                      |     |      |      |     |     |     |       |                   |  |
| A*02:474                                                | 02:474              | HLA10800 |                                               | 0        | 0        | 0        | 0        | 0        | 0        | 1        | 1        |                                                      |     |      |      |     |     |     |       |                   |  |
| A*02:483                                                | 02:483              | HLA10935 |                                               | 0        | 0        | 0        | 0        | 0        | 0        | 2        | 2        |                                                      |     |      |      |     |     |     |       |                   |  |
| A*02:484                                                | 02:484              | HLA10986 |                                               | 0        | 0        | 5        | 0        | 0        | 0        | 0        | 5        |                                                      |     | WD   |      |     |     |     | WD    | WD                |  |
| A*02:486                                                | 02:486              | HLA10988 |                                               | 0        | 0        | 2        | 0        | 0        | 0        | 0        | 2        |                                                      |     |      |      |     |     |     |       |                   |  |
| A*02:487                                                | 02:487              | HLA10990 |                                               | 0        | 1        | 0        | 0        | 0        | 0        | 0        | 1        |                                                      |     |      |      |     |     |     |       |                   |  |
| A*02:495                                                | 02:495              | HLA11405 |                                               | 0        | 0        | 1        | 0        | 0        | 0        | 0        | 1        |                                                      |     |      |      |     |     |     |       |                   |  |
| A*02:497                                                | 02:497              | HLA11555 |                                               | 0        | 0        | 0        | 0        | 1        | 0        | 0        | 1        |                                                      |     |      |      |     |     |     |       |                   |  |
| A*02:498                                                | 02:498              | HLA11408 |                                               | 0        | 0        | 5        | 0        | 0        | 0        | 0        | 5        |                                                      |     | WD   |      |     |     |     | WD    | WD                |  |
| A*02:500Q                                               | 02:500Q             | HLA11410 |                                               | 0        | 1        | 0        | 0        | 0        | 0        | 0        | 1        |                                                      |     |      |      |     |     |     |       |                   |  |
| A*02:503                                                | 02:503              | HLA11413 |                                               | 0        | 4        | 0        | 0        | 0        | 0        | 0        | 4        |                                                      |     |      |      |     |     |     |       |                   |  |
| A*02:504                                                | 02:504              | HLA11414 |                                               | 0        | 0        | 0        | 0        | 0        | 0        | 2        | 2        |                                                      |     |      |      |     |     |     |       |                   |  |
| A*02:508                                                | 02:508              | HLA11643 |                                               | 1        | 0        | 0        | 0        | 0        | 0        | 0        | 1        |                                                      |     |      |      |     |     |     |       |                   |  |
| A*02:514N                                               | 02:514N             | HLA11808 |                                               | 0        | 8        | 0        | 0        | 0        | 0        | 0        | 8        |                                                      | WD  |      |      |     |     |     | WD    | WD                |  |
| A*02:515                                                | 02:515              | HLA11809 |                                               | 0        | 0        | 0        | 0        | 0        | 0        | 1        | 1        |                                                      |     |      |      |     |     |     |       |                   |  |
| A*02:517                                                | 02:517              | HLA11812 |                                               | 1        | 0        | 0        | 0        | 1        | 0        | 0        | 2        |                                                      |     |      |      |     |     |     |       |                   |  |

| Supplemental Table 8: HLA-A Allele Summary <sup>a</sup> |                     |          | Allele Count by Population Group <sup>b</sup> |          |          |          |          |          |          |          |          | 3.0.0 CIWD Category by Population Group <sup>c</sup> |     |      |      |     |     |     |       |                   |  |
|---------------------------------------------------------|---------------------|----------|-----------------------------------------------|----------|----------|----------|----------|----------|----------|----------|----------|------------------------------------------------------|-----|------|------|-----|-----|-----|-------|-------------------|--|
| Allele                                                  | Genomic Typing      | AlleleID | G group                                       | AFA      | API      | EURO     | MENA     | HIS      | NAM      | UNK      | Total    | AFA                                                  | API | EURO | MENA | HIS | NAM | UNK | Total | Highest Frequency |  |
| A*02:518                                                | 02:518              | HLA11993 |                                               | 0        | 0        | 1        | 0        | 0        | 0        | 0        | 1        |                                                      |     |      |      |     |     |     |       |                   |  |
| A*02:521                                                | 02:521              | HLA11997 |                                               | 0        | 0        | 1        | 0        | 0        | 0        | 0        | 1        |                                                      |     |      |      |     |     |     |       |                   |  |
| A*02:523                                                | 02:523              | HLA11943 |                                               | 0        | 0        | 1        | 0        | 0        | 0        | 0        | 1        |                                                      |     |      |      |     |     |     |       |                   |  |
| <b>A*02:524 total</b>                                   | <b>02:524 total</b> |          |                                               | <b>0</b> | <b>0</b> | <b>3</b> | <b>0</b> | <b>0</b> | <b>0</b> | <b>0</b> | <b>3</b> |                                                      |     |      |      |     |     |     |       |                   |  |
| A*02:524                                                | 02:524              |          |                                               | 0        | 0        | 1        | 0        | 0        | 0        | 0        | 1        |                                                      |     |      |      |     |     |     |       |                   |  |
| A*02:524:01                                             | 02:524:01           | HLA11962 |                                               | 0        | 0        | 1        | 0        | 0        | 0        | 0        | 1        |                                                      |     |      |      |     |     |     |       |                   |  |
| A*02:524:02                                             | 02:524:02           | HLA14720 |                                               | 0        | 0        | 1        | 0        | 0        | 0        | 0        | 1        |                                                      |     |      |      |     |     |     |       |                   |  |
| A*02:526                                                | 02:526              | HLA12092 |                                               | 0        | 0        | 0        | 1        | 0        | 0        | 1        | 2        |                                                      |     |      |      |     |     |     |       |                   |  |
| A*02:527                                                | 02:527              | HLA12115 |                                               | 0        | 0        | 1        | 0        | 0        | 0        | 0        | 1        |                                                      |     |      |      |     |     |     |       |                   |  |
| <b>A*02:528 total</b>                                   | <b>02:528 total</b> |          |                                               | <b>0</b> | <b>0</b> | <b>1</b> | <b>0</b> | <b>0</b> | <b>0</b> | <b>0</b> | <b>1</b> |                                                      |     |      |      |     |     |     |       |                   |  |
| A*02:528                                                | 02:528              |          |                                               | 0        | 0        | 1        | 0        | 0        | 0        | 0        | 1        |                                                      |     |      |      |     |     |     |       |                   |  |
| A*02:529                                                | 02:529              | HLA12119 |                                               | 0        | 2        | 0        | 0        | 0        | 0        | 0        | 2        |                                                      |     |      |      |     |     |     |       |                   |  |
| A*02:530                                                | 02:530              | HLA12120 |                                               | 0        | 0        | 0        | 0        | 1        | 0        | 0        | 1        |                                                      |     |      |      |     |     |     |       |                   |  |
| A*02:531                                                | 02:531              | HLA12122 |                                               | 2        | 0        | 0        | 0        | 0        | 0        | 0        | 2        |                                                      |     |      |      |     |     |     |       |                   |  |
| A*02:536                                                | 02:536              | HLA12165 |                                               | 0        | 0        | 1        | 0        | 0        | 0        | 0        | 1        |                                                      |     |      |      |     |     |     |       |                   |  |
| A*02:541                                                | 02:541              | HLA12408 |                                               | 0        | 0        | 0        | 0        | 0        | 0        | 1        | 1        |                                                      |     |      |      |     |     |     |       |                   |  |
| A*02:543                                                | 02:543              | HLA12469 |                                               | 0        | 0        | 2        | 0        | 0        | 0        | 0        | 2        |                                                      |     |      |      |     |     |     |       |                   |  |
| A*02:545                                                | 02:545              | HLA12615 |                                               | 0        | 0        | 1        | 0        | 0        | 0        | 0        | 1        |                                                      |     |      |      |     |     |     |       |                   |  |
| A*02:548                                                | 02:548              | HLA12736 |                                               | 0        | 0        | 0        | 0        | 1        | 0        | 0        | 1        |                                                      |     |      |      |     |     |     |       |                   |  |
| A*02:549                                                | 02:549              | HLA12641 |                                               | 0        | 0        | 2        | 0        | 0        | 0        | 0        | 2        |                                                      |     |      |      |     |     |     |       |                   |  |
| A*02:550                                                | 02:550              | HLA12642 |                                               | 0        | 1        | 0        | 0        | 0        | 0        | 0        | 1        |                                                      |     |      |      |     |     |     |       |                   |  |
| A*02:551                                                | 02:551              | HLA12644 |                                               | 0        | 0        | 1        | 0        | 0        | 0        | 0        | 1        |                                                      |     |      |      |     |     |     |       |                   |  |
| A*02:552                                                | 02:552              | HLA12646 |                                               | 0        | 0        | 0        | 0        | 2        | 0        | 1        | 3        |                                                      |     |      |      |     |     |     |       |                   |  |
| A*02:554                                                | 02:554              | HLA12648 |                                               | 0        | 0        | 0        | 0        | 1        | 0        | 0        | 1        |                                                      |     |      |      |     |     |     |       |                   |  |
| A*02:556                                                | 02:556              | HLA12973 |                                               | 0        | 0        | 1        | 0        | 0        | 0        | 0        | 1        |                                                      |     |      |      |     |     |     |       |                   |  |
| A*02:560                                                | 02:560              | HLA13080 |                                               | 0        | 1        | 0        | 0        | 0        | 0        | 0        | 1        |                                                      |     |      |      |     |     |     |       |                   |  |
| A*02:561                                                | 02:561              | HLA13083 |                                               | 0        | 0        | 1        | 0        | 0        | 0        | 0        | 1        |                                                      |     |      |      |     |     |     |       |                   |  |
| A*02:562                                                | 02:562              | HLA13084 |                                               | 0        | 0        | 1        | 7        | 0        | 0        | 0        | 8        |                                                      |     |      | WD   |     |     |     | WD    | WD                |  |
| A*02:564                                                | 02:564              | HLA13086 |                                               | 0        | 0        | 1        | 0        | 1        | 0        | 0        | 2        |                                                      |     |      |      |     |     |     |       |                   |  |
| A*02:568                                                | 02:568              | HLA13092 |                                               | 0        | 1        | 0        | 0        | 0        | 0        | 0        | 1        |                                                      |     |      |      |     |     |     |       |                   |  |

| Supplemental Table 8: HLA-A Allele Summary <sup>a</sup> |                        |          | Allele Count by Population Group <sup>b</sup> |              |              |                |              |              |             |               |                | 3.0.0 CIWD Category by Population Group <sup>c</sup> |          |          |          |          |          |          |          |                   |          |
|---------------------------------------------------------|------------------------|----------|-----------------------------------------------|--------------|--------------|----------------|--------------|--------------|-------------|---------------|----------------|------------------------------------------------------|----------|----------|----------|----------|----------|----------|----------|-------------------|----------|
| Allele                                                  | Genomic Typing         | AlleleID | G group                                       | AFA          | API          | EURO           | MENA         | HIS          | NAM         | UNK           | Total          | AFA                                                  | API      | EURO     | MENA     | HIS      | NAM      | UNK      | Total    | Highest Frequency |          |
| A*02:569                                                | 02:569                 | HLA13093 |                                               | 0            | 1            | 0              | 0            | 0            | 0           | 0             | 1              |                                                      |          |          |          |          |          |          |          |                   |          |
| A*02:574                                                | 02:574                 | HLA13458 |                                               | 0            | 0            | 0              | 0            | 1            | 0           | 0             | 1              |                                                      |          |          |          |          |          |          |          |                   |          |
| A*02:579                                                | 02:579                 | HLA13733 |                                               | 0            | 1            | 0              | 0            | 0            | 0           | 0             | 1              |                                                      |          |          |          |          |          |          |          |                   |          |
| A*02:580                                                | 02:580                 | HLA13734 |                                               | 0            | 7            | 0              | 0            | 0            | 0           | 0             | 7              |                                                      | WD       |          |          |          |          |          | WD       | WD                |          |
| A*02:581                                                | 02:581                 | HLA13849 |                                               | 0            | 0            | 0              | 0            | 0            | 0           | 2             | 2              |                                                      |          |          |          |          |          |          |          |                   |          |
| A*02:587                                                | 02:587                 | HLA13772 |                                               | 0            | 0            | 2              | 1            | 0            | 0           | 0             | 3              |                                                      |          |          |          |          |          |          |          |                   |          |
| A*02:589                                                | 02:589                 | HLA14004 |                                               | 0            | 1            | 0              | 0            | 0            | 0           | 0             | 1              |                                                      |          |          |          |          |          |          |          |                   |          |
| A*02:592                                                | 02:592                 | HLA14133 |                                               | 0            | 0            | 2              | 0            | 0            | 0           | 0             | 2              |                                                      |          |          |          |          |          |          |          |                   |          |
| A*02:595                                                | 02:595                 | HLA14136 |                                               | 0            | 3            | 0              | 0            | 0            | 0           | 0             | 3              |                                                      |          |          |          |          |          |          |          |                   |          |
| A*02:602                                                | 02:602                 | HLA14396 |                                               | 0            | 0            | 0              | 0            | 1            | 0           | 0             | 1              |                                                      |          |          |          |          |          |          |          |                   |          |
| A*02:605Q                                               | 02:605Q                | HLA14515 |                                               | 0            | 0            | 1              | 0            | 0            | 0           | 0             | 1              |                                                      |          |          |          |          |          |          |          |                   |          |
| A*02:611                                                | 02:611                 | HLA14718 |                                               | 0            | 1            | 0              | 0            | 0            | 0           | 0             | 1              |                                                      |          |          |          |          |          |          |          |                   |          |
| A*02:612                                                | 02:612                 | HLA14719 |                                               | 0            | 1            | 0              | 0            | 0            | 0           | 0             | 1              |                                                      |          |          |          |          |          |          |          |                   |          |
| A*02:616                                                | 02:616                 | HLA14921 |                                               | 0            | 0            | 1              | 0            | 0            | 0           | 0             | 1              |                                                      |          |          |          |          |          |          |          |                   |          |
| A*02:623                                                | 02:623                 | HLA14875 |                                               | 0            | 0            | 0              | 0            | 0            | 0           | 16            | 16             |                                                      |          |          |          |          |          | I        | WD       | I                 |          |
| A*02:626                                                | 02:626                 | HLA14899 |                                               | 0            | 0            | 1              | 0            | 0            | 0           | 0             | 1              |                                                      |          |          |          |          |          |          |          |                   |          |
| A*02:639                                                | 02:639                 | HLA15535 |                                               | 0            | 0            | 0              | 0            | 1            | 0           | 0             | 1              |                                                      |          |          |          |          |          |          |          |                   |          |
| A*02:646                                                | 02:646                 | HLA15828 |                                               | 0            | 0            | 1              | 0            | 0            | 0           | 0             | 1              |                                                      |          |          |          |          |          |          |          |                   |          |
| A*02:673                                                | 02:673                 | HLA16879 |                                               | 0            | 0            | 1              | 0            | 0            | 0           | 0             | 1              |                                                      |          |          |          |          |          |          |          |                   |          |
| A*02:CODE                                               | 02:CODE                |          |                                               | 2134         | 3755         | 99979          | 1675         | 11124        | 499         | 12089         | 131255         | NA                                                   | NA       | NA       | NA       | NA       | NA       | NA       | NA       | NA                | NA       |
| <b>A*03:01 total</b>                                    | <b>03:01 total</b>     |          |                                               | <b>29370</b> | <b>63469</b> | <b>1592095</b> | <b>32064</b> | <b>49403</b> | <b>4907</b> | <b>136849</b> | <b>1908157</b> | <b>C</b>                                             | <b>C</b> | <b>C</b> | <b>C</b> | <b>C</b> | <b>C</b> | <b>C</b> | <b>C</b> | <b>C</b>          | <b>C</b> |
| A*03:01                                                 | 03:01                  |          |                                               | 12           | 11           | 6403           | 14           | 46           | 0           | 316           | 6802           | WD                                                   | WD       | C        | WD       | I        |          | C        | C        | C                 |          |
| A*03:01P                                                | 03:01P                 |          |                                               | 1            | 4            | 1512           | 4            | 4            | 0           | 5             | 1530           |                                                      |          | C        |          |          |          | WD       | I        | C                 |          |
| <b>A*03:01:01G total</b>                                | <b>03:01:01G total</b> |          |                                               | <b>29245</b> | <b>63439</b> | <b>1583173</b> | <b>32036</b> | <b>49234</b> | <b>4895</b> | <b>136406</b> | <b>1898428</b> | <b>C</b>                                             | <b>C</b> | <b>C</b> | <b>C</b> | <b>C</b> | <b>C</b> | <b>C</b> | <b>C</b> | <b>C</b>          | <b>C</b> |
| A*03:01:01G                                             | 03:01:01G              |          | 03:01:01G                                     | 24144        | 60337        | 1517234        | 31309        | 37296        | 3784        | 127307        | 1801411        | C                                                    | C        | C        | C        | C        | C        | C        | C        | C                 | C        |
| A*03:01:01                                              | 03:01:01               |          | 03:01:01G                                     | 1200         | 745          | 17281          | 181          | 2901         | 235         | 2282          | 24825          | C                                                    | C        | C        | C        | C        | C        | C        | C        | C                 | C        |
| A*03:01:01:01                                           | 03:01:01:01            | HLA00037 | 03:01:01G                                     | 1497         | 2314         | 46439          | 483          | 7929         | 740         | 6041          | 65443          | C                                                    | C        | C        | C        | C        | C        | C        | C        | C                 | C        |
| <b>A*03:01N total</b>                                   | <b>03:01N total</b>    |          |                                               | <b>0</b>     | <b>0</b>     | <b>1</b>       | <b>0</b>     | <b>0</b>     | <b>0</b>    | <b>0</b>      | <b>1</b>       |                                                      |          |          |          |          |          |          |          |                   |          |
| A*03:01:01:02N                                          | 03:01:01:02N           | HLA01718 | 03:01:01G                                     | 0            | 0            | 1              | 0            | 0            | 0           | 0             | 1              |                                                      |          |          |          |          |          |          |          |                   |          |
| A*03:01:01:03                                           | 03:01:01:03            | HLA01960 | 03:01:01G                                     | 13           | 9            | 558            | 15           | 155          | 5           | 63            | 818            | WD                                                   | WD       | I        | WD       | C        | WD       | I        | I        | I                 | C        |

| Supplemental Table 8: HLA-A Allele Summary <sup>a</sup> |                |          | Allele Count by Population Group <sup>b</sup> |      |     |      |      |     |     |     |       | 3.0.0 CIWD Category by Population Group <sup>c</sup> |     |      |      |     |     |     |       |                   |
|---------------------------------------------------------|----------------|----------|-----------------------------------------------|------|-----|------|------|-----|-----|-----|-------|------------------------------------------------------|-----|------|------|-----|-----|-----|-------|-------------------|
| Allele                                                  | Genomic Typing | AlleleID | G group                                       | AFA  | API | EURO | MENA | HIS | NAM | UNK | Total | AFA                                                  | API | EURO | MENA | HIS | NAM | UNK | Total | Highest Frequency |
| A*03:01:01:05                                           | 03:01:01:05    | HLA13785 | 03:01:01G                                     | 2068 | 28  | 1535 | 43   | 892 | 113 | 641 | 5320  | C                                                    | I   | C    | C    | C   | C   | C   | C     | C                 |
| A*03:01:01:06                                           | 03:01:01:06    | HLA14216 | 03:01:01G                                     | 0    | 0   | 6    | 0    | 0   | 0   | 0   | 6     |                                                      |     | WD   |      |     |     |     | WD    | WD                |
| A*03:01:01:07                                           | 03:01:01:07    | HLA14827 | 03:01:01G                                     | 321  | 1   | 7    | 2    | 56  | 17  | 54  | 458   | C                                                    |     | WD   |      | I   | C   | I   | I     | C                 |
| A*03:01:01:08                                           | 03:01:01:08    | HLA15501 | 03:01:01G                                     | 0    | 0   | 11   | 0    | 0   | 0   | 0   | 11    |                                                      |     | WD   |      |     |     |     | WD    | WD                |
| A*03:01:01:09                                           | 03:01:01:09    | HLA15759 | 03:01:01G                                     | 0    | 0   | 1    | 0    | 0   | 0   | 0   | 1     |                                                      |     |      |      |     |     |     |       |                   |
| A*03:01:01:10                                           | 03:01:01:10    | HLA15761 | 03:01:01G                                     | 0    | 0   | 1    | 0    | 0   | 0   | 0   | 1     |                                                      |     |      |      |     |     |     |       |                   |
| A*03:01:01:11                                           | 03:01:01:11    | HLA16662 | 03:01:01G                                     | 1    | 0   | 13   | 0    | 0   | 0   | 1   | 15    |                                                      |     | WD   |      |     |     |     | WD    | WD                |
| A*03:01:56                                              | 03:01:56       | HLA14001 | 03:01:01G                                     | 0    | 0   | 1    | 0    | 0   | 0   | 1   | 2     |                                                      |     |      |      |     |     |     |       |                   |
| A*03:20                                                 | 03:20          | HLA02325 | 03:01:01G                                     | 0    | 2   | 59   | 3    | 1   | 0   | 10  | 75    |                                                      |     | WD   |      |     |     | WD  | WD    | WD                |
| A*03:21N                                                | 03:21N         | HLA02369 | 03:01:01G                                     | 0    | 0   | 5    | 0    | 1   | 0   | 0   | 6     |                                                      |     | WD   |      |     |     |     | WD    | WD                |
| A*03:26                                                 | 03:26          | HLA02761 | 03:01:01G                                     | 1    | 3   | 18   | 0    | 3   | 1   | 6   | 32    |                                                      |     | WD   |      |     |     | WD  | WD    | WD                |
| A*03:132                                                | 03:132         | HLA07040 | 03:01:01G                                     | 0    | 0   | 2    | 0    | 0   | 0   | 0   | 2     |                                                      |     |      |      |     |     |     |       |                   |
| A*03:134                                                | 03:134         | HLA07353 | 03:01:01G                                     | 0    | 0   | 1    | 0    | 0   | 0   | 0   | 1     |                                                      |     |      |      |     |     |     |       |                   |
| A*03:01:02                                              | 03:01:02       | HLA00038 |                                               | 94   | 1   | 11   | 3    | 5   | 1   | 16  | 131   | C                                                    |     | WD   |      | WD  |     | I   | WD    | C                 |
| A*03:01:03                                              | 03:01:03       | HLA00039 |                                               | 15   | 3   | 431  | 2    | 110 | 10  | 62  | 633   | WD                                                   |     | I    |      | C   | C   | I   | I     | C                 |
| A*03:01:05                                              | 03:01:05       | HLA02576 |                                               | 0    | 0   | 80   | 0    | 0   | 0   | 1   | 81    |                                                      |     | WD   |      |     |     |     | WD    | WD                |
| A*03:01:11                                              | 03:01:11       | HLA03743 |                                               | 0    | 2   | 87   | 0    | 1   | 0   | 4   | 94    |                                                      |     | WD   |      |     |     |     | WD    | WD                |
| A*03:01:12                                              | 03:01:12       | HLA03800 |                                               | 0    | 1   | 18   | 0    | 0   | 0   | 0   | 19    |                                                      |     | WD   |      |     |     |     | WD    | WD                |
| A*03:01:14                                              | 03:01:14       | HLA03873 |                                               | 0    | 0   | 223  | 0    | 0   | 0   | 4   | 227   |                                                      |     | I    |      |     |     |     | I     | I                 |
| A*03:01:15                                              | 03:01:15       | HLA03927 |                                               | 0    | 0   | 26   | 0    | 0   | 0   | 3   | 29    |                                                      |     | WD   |      |     |     |     | WD    | WD                |
| A*03:01:16                                              | 03:01:16       | HLA04148 |                                               | 0    | 0   | 3    | 0    | 0   | 0   | 4   | 7     |                                                      |     |      |      |     |     |     | WD    | WD                |
| A*03:01:17                                              | 03:01:17       | HLA04422 |                                               | 0    | 0   | 29   | 0    | 0   | 0   | 0   | 29    |                                                      |     | WD   |      |     |     |     | WD    | WD                |
| A*03:01:18                                              | 03:01:18       | HLA05335 |                                               | 0    | 0   | 27   | 0    | 0   | 0   | 1   | 28    |                                                      |     | WD   |      |     |     |     | WD    | WD                |
| A*03:01:19                                              | 03:01:19       | HLA05337 |                                               | 0    | 0   | 19   | 0    | 1   | 0   | 0   | 20    |                                                      |     | WD   |      |     |     |     | WD    | WD                |
| A*03:01:20                                              | 03:01:20       | HLA05453 |                                               | 0    | 0   | 1    | 0    | 0   | 0   | 0   | 1     |                                                      |     |      |      |     |     |     |       |                   |
| A*03:01:21                                              | 03:01:21       | HLA05665 |                                               | 0    | 0   | 5    | 1    | 0   | 0   | 5   | 11    |                                                      |     | WD   |      |     |     | WD  | WD    | WD                |
| A*03:01:22                                              | 03:01:22       | HLA05686 |                                               | 0    | 0   | 3    | 0    | 0   | 0   | 0   | 3     |                                                      |     |      |      |     |     |     |       |                   |
| A*03:01:23                                              | 03:01:23       | HLA05689 |                                               | 0    | 0   | 6    | 0    | 0   | 0   | 12  | 18    |                                                      |     | WD   |      |     |     | WD  | WD    | WD                |
| A*03:01:24                                              | 03:01:24       | HLA06328 |                                               | 0    | 0   | 1    | 0    | 0   | 0   | 0   | 1     |                                                      |     |      |      |     |     |     |       |                   |
| A*03:01:25                                              | 03:01:25       | HLA06345 |                                               | 0    | 0   | 1    | 0    | 0   | 0   | 0   | 1     |                                                      |     |      |      |     |     |     |       |                   |

| Supplemental Table 8: HLA-A Allele Summary <sup>a</sup> |                        |          | Allele Count by Population Group <sup>b</sup> |            |             |              |              |             |            |             |              | 3.0.0 CIWD Category by Population Group <sup>c</sup> |          |           |          |          |          |          |           |                   |
|---------------------------------------------------------|------------------------|----------|-----------------------------------------------|------------|-------------|--------------|--------------|-------------|------------|-------------|--------------|------------------------------------------------------|----------|-----------|----------|----------|----------|----------|-----------|-------------------|
| Allele                                                  | Genomic Typing         | AlleleID | G group                                       | AFA        | API         | EURO         | MENA         | HIS         | NAM        | UNK         | Total        | AFA                                                  | API      | EURO      | MENA     | HIS      | NAM      | UNK      | Total     | Highest Frequency |
| A*03:01:28                                              | 03:01:28               | HLA06562 |                                               | 2          | 0           | 9            | 0            | 1           | 0          | 2           | 14           |                                                      |          | WD        |          |          |          |          | WD        | WD                |
| A*03:01:30                                              | 03:01:30               | HLA06766 |                                               | 0          | 0           | 1            | 0            | 0           | 0          | 0           | 1            |                                                      |          |           |          |          |          |          |           |                   |
| A*03:01:31                                              | 03:01:31               | HLA06772 |                                               | 0          | 0           | 8            | 0            | 0           | 0          | 0           | 8            |                                                      |          | WD        |          |          |          |          | WD        | WD                |
| A*03:01:32                                              | 03:01:32               | HLA07598 |                                               | 0          | 0           | 0            | 0            | 0           | 1          | 0           | 1            |                                                      |          |           |          |          |          |          |           |                   |
| A*03:01:33                                              | 03:01:33               | HLA07602 |                                               | 0          | 0           | 6            | 0            | 0           | 0          | 2           | 8            |                                                      |          | WD        |          |          |          |          | WD        | WD                |
| A*03:01:34                                              | 03:01:34               | HLA08448 |                                               | 0          | 0           | 1            | 0            | 0           | 0          | 4           | 5            |                                                      |          |           |          |          |          |          | WD        | WD                |
| A*03:01:36                                              | 03:01:36               | HLA08489 |                                               | 0          | 0           | 1            | 0            | 0           | 0          | 0           | 1            |                                                      |          |           |          |          |          |          |           |                   |
| A*03:01:38                                              | 03:01:38               | HLA08641 |                                               | 1          | 0           | 4            | 0            | 0           | 0          | 1           | 6            |                                                      |          |           |          |          |          |          | WD        | WD                |
| A*03:01:39                                              | 03:01:39               | HLA09118 |                                               | 0          | 0           | 5            | 0            | 0           | 0          | 0           | 5            |                                                      |          | WD        |          |          |          |          | WD        | WD                |
| A*03:01:42                                              | 03:01:42               | HLA09545 |                                               | 0          | 0           | 2            | 0            | 0           | 0          | 0           | 2            |                                                      |          |           |          |          |          |          |           |                   |
| A*03:01:43                                              | 03:01:43               | HLA09546 |                                               | 0          | 5           | 0            | 1            | 0           | 0          | 0           | 6            |                                                      | WD       |           |          |          |          |          | WD        | WD                |
| A*03:01:45                                              | 03:01:45               | HLA10983 |                                               | 0          | 0           | 1            | 0            | 1           | 0          | 0           | 2            |                                                      |          |           |          |          |          |          |           |                   |
| A*03:01:51                                              | 03:01:51               | HLA11804 |                                               | 0          | 0           | 0            | 0            | 1           | 0          | 1           | 2            |                                                      |          |           |          |          |          |          |           |                   |
| A*03:01:52                                              | 03:01:52               | HLA12554 |                                               | 0          | 0           | 0            | 3            | 0           | 0          | 0           | 3            |                                                      |          |           |          |          |          |          |           |                   |
| A*03:01:53                                              | 03:01:53               | HLA12640 |                                               | 0          | 1           | 0            | 0            | 0           | 0          | 0           | 1            |                                                      |          |           |          |          |          |          |           |                   |
| A*03:01:54                                              | 03:01:54               | HLA12883 |                                               | 0          | 2           | 0            | 0            | 0           | 0          | 0           | 2            |                                                      |          |           |          |          |          |          |           |                   |
| A*03:01:55                                              | 03:01:55               | HLA13452 |                                               | 0          | 0           | 4            | 0            | 0           | 0          | 0           | 4            |                                                      |          |           |          |          |          |          |           |                   |
| <b>A*03:02 total</b>                                    | <b>03:02 total</b>     |          |                                               | <b>439</b> | <b>6003</b> | <b>31494</b> | <b>10958</b> | <b>1519</b> | <b>104</b> | <b>8787</b> | <b>59304</b> | <b>C</b>                                             | <b>C</b> | <b>C</b>  | <b>C</b> | <b>C</b> | <b>C</b> | <b>C</b> | <b>C</b>  | <b>C</b>          |
| A*03:02                                                 | 03:02                  |          |                                               | 25         | 487         | 4021         | 1298         | 192         | 9          | 1849        | 7881         | WD                                                   | C        | C         | C        | C        | C        | C        | C         | C                 |
| A*03:02P                                                | 03:02P                 |          |                                               | 0          | 0           | 120          | 0            | 0           | 0          | 1           | 121          |                                                      |          | I         |          |          |          |          | WD        | I                 |
| <b>A*03:02:01G total</b>                                | <b>03:02:01G total</b> |          |                                               | <b>414</b> | <b>5516</b> | <b>27352</b> | <b>9660</b>  | <b>1327</b> | <b>95</b>  | <b>6935</b> | <b>51299</b> | <b>C</b>                                             | <b>C</b> | <b>C</b>  | <b>C</b> | <b>C</b> | <b>C</b> | <b>C</b> | <b>C</b>  | <b>C</b>          |
| A*03:02:01G                                             | 03:02:01G              |          | 03:02:01G                                     | 199        | 3408        | 14330        | 5190         | 404         | 27         | 4701        | 28259        | C                                                    | C        | C         | C        | C        | C        | C        | C         | C                 |
| A*03:02:01                                              | 03:02:01               | HLA00040 | 03:02:01G                                     | 215        | 2108        | 13022        | 4470         | 923         | 68         | 2234        | 23040        | C                                                    | C        | C         | C        | C        | C        | C        | C         | C                 |
| A*03:02:03                                              | 03:02:03               | HLA07409 |                                               | 0          | 0           | 0            | 0            | 0           | 0          | 2           | 2            |                                                      |          |           |          |          |          |          |           |                   |
| A*03:02:04                                              | 03:02:04               | HLA11969 |                                               | 0          | 0           | 1            | 0            | 0           | 0          | 0           | 1            |                                                      |          |           |          |          |          |          |           |                   |
| <b>A*03:04 total</b>                                    | <b>03:04 total</b>     |          |                                               | <b>1</b>   | <b>0</b>    | <b>9</b>     | <b>0</b>     | <b>8</b>    | <b>0</b>   | <b>2</b>    | <b>20</b>    |                                                      |          | <b>WD</b> |          | <b>I</b> |          |          | <b>WD</b> | <b>I</b>          |
| A*03:04                                                 | 03:04                  |          |                                               | 0          | 0           | 1            | 0            | 0           | 0          | 0           | 1            |                                                      |          |           |          |          |          |          |           |                   |
| A*03:04:01                                              | 03:04:01               | HLA00042 |                                               | 1          | 0           | 6            | 0            | 8           | 0          | 2           | 17           |                                                      |          | WD        |          | I        |          |          | WD        | I                 |
| A*03:04:02                                              | 03:04:02               | HLA06087 |                                               | 0          | 0           | 1            | 0            | 0           | 0          | 0           | 1            |                                                      |          |           |          |          |          |          |           |                   |
| A*03:04:03                                              | 03:04:03               | HLA08450 |                                               | 0          | 0           | 1            | 0            | 0           | 0          | 0           | 1            |                                                      |          |           |          |          |          |          |           |                   |

| Supplemental Table 8: HLA-A Allele Summary <sup>a</sup> |                    |          | Allele Count by Population Group <sup>b</sup> |          |          |            |          |           |          |           |            | 3.0.0 CIWD Category by Population Group <sup>c</sup> |     |           |      |          |     |           |           |                   |
|---------------------------------------------------------|--------------------|----------|-----------------------------------------------|----------|----------|------------|----------|-----------|----------|-----------|------------|------------------------------------------------------|-----|-----------|------|----------|-----|-----------|-----------|-------------------|
| Allele                                                  | Genomic Typing     | AlleleID | G group                                       | AFA      | API      | EURO       | MENA     | HIS       | NAM      | UNK       | Total      | AFA                                                  | API | EURO      | MENA | HIS      | NAM | UNK       | Total     | Highest Frequency |
| <b>A*03:05 total</b>                                    | <b>03:05 total</b> |          |                                               | <b>3</b> | <b>1</b> | <b>622</b> | <b>3</b> | <b>28</b> | <b>3</b> | <b>39</b> | <b>699</b> |                                                      |     | I         |      | I        |     | I         | I         | I                 |
| A*03:05                                                 | 03:05              |          |                                               | 3        | 0        | 96         | 0        | 5         | 0        | 4         | 108        |                                                      |     | WD        |      | WD       |     |           | WD        | WD                |
| A*03:05:01                                              | 03:05:01           | HLA01107 |                                               | 0        | 1        | 526        | 3        | 23        | 3        | 35        | 591        |                                                      |     | I         |      | I        |     | I         | I         | I                 |
| A*03:06                                                 | 03:06              | HLA01251 |                                               | 2        | 0        | 8          | 0        | 0         | 0        | 2         | 12         |                                                      |     | WD        |      |          |     |           | WD        | WD                |
| <b>A*03:07 total</b>                                    | <b>03:07 total</b> |          |                                               | <b>9</b> | <b>0</b> | <b>112</b> | <b>0</b> | <b>16</b> | <b>3</b> | <b>8</b>  | <b>148</b> | <b>WD</b>                                            |     | <b>WD</b> |      | <b>I</b> |     | <b>WD</b> | <b>WD</b> | <b>I</b>          |
| A*03:07                                                 | 03:07              |          |                                               | 9        | 0        | 105        | 0        | 16        | 3        | 8         | 141        | WD                                                   |     | WD        |      | I        |     | WD        | WD        | I                 |
| A*03:07:01                                              | 03:07:01           | HLA01275 |                                               | 0        | 0        | 7          | 0        | 0         | 0        | 0         | 7          |                                                      |     | WD        |      |          |     |           | WD        | WD                |
| A*03:08                                                 | 03:08              | HLA01302 |                                               | 12       | 1        | 110        | 2        | 2         | 2        | 15        | 144        | WD                                                   |     | WD        |      |          |     | I         | WD        | I                 |
| A*03:09                                                 | 03:09              | HLA01477 |                                               | 0        | 0        | 3          | 1        | 1         | 0        | 1         | 6          |                                                      |     |           |      |          |     |           | WD        | WD                |
| A*03:10                                                 | 03:10              | HLA01646 |                                               | 0        | 9        | 0          | 0        | 0         | 0        | 1         | 10         |                                                      | WD  |           |      |          |     |           | WD        | WD                |
| A*03:11N                                                | 03:11N             | HLA01714 |                                               | 0        | 0        | 4          | 0        | 0         | 0        | 0         | 4          |                                                      |     |           |      |          |     |           |           |                   |
| A*03:12                                                 | 03:12              | HLA01771 |                                               | 0        | 1        | 5          | 0        | 0         | 0        | 0         | 6          |                                                      |     | WD        |      |          |     |           | WD        | WD                |
| A*03:13                                                 | 03:13              | HLA01826 |                                               | 0        | 0        | 8          | 0        | 0         | 0        | 0         | 8          |                                                      |     | WD        |      |          |     |           | WD        | WD                |
| A*03:14                                                 | 03:14              | HLA01827 |                                               | 0        | 0        | 35         | 0        | 0         | 0        | 0         | 35         |                                                      |     | WD        |      |          |     |           | WD        | WD                |
| A*03:15                                                 | 03:15              | HLA02109 |                                               | 0        | 0        | 52         | 0        | 2         | 0        | 1         | 55         |                                                      |     | WD        |      |          |     |           | WD        | WD                |
| A*03:16                                                 | 03:16              | HLA02111 |                                               | 0        | 0        | 6          | 0        | 1         | 1        | 1         | 9          |                                                      |     | WD        |      |          |     |           | WD        | WD                |
| <b>A*03:17 total</b>                                    | <b>03:17 total</b> |          |                                               | <b>1</b> | <b>0</b> | <b>21</b>  | <b>0</b> | <b>1</b>  | <b>0</b> | <b>4</b>  | <b>27</b>  |                                                      |     | <b>WD</b> |      |          |     |           | <b>WD</b> | <b>WD</b>         |
| A*03:17                                                 | 03:17              |          |                                               | 0        | 0        | 10         | 0        | 0         | 0        | 0         | 10         |                                                      |     | WD        |      |          |     |           | WD        | WD                |
| A*03:17:01                                              | 03:17:01           | HLA02197 |                                               | 0        | 0        | 11         | 0        | 1         | 0        | 4         | 16         |                                                      |     | WD        |      |          |     |           | WD        | WD                |
| A*03:17:02                                              | 03:17:02           | HLA07998 |                                               | 1        | 0        | 0          | 0        | 0         | 0        | 0         | 1          |                                                      |     |           |      |          |     |           |           |                   |
| A*03:18                                                 | 03:18              | HLA02290 |                                               | 0        | 1        | 2          | 5        | 0         | 0        | 0         | 8          |                                                      |     |           | WD   |          |     |           | WD        | WD                |
| <b>A*03:22 total</b>                                    | <b>03:22 total</b> |          |                                               | <b>2</b> | <b>2</b> | <b>113</b> | <b>1</b> | <b>2</b>  | <b>0</b> | <b>2</b>  | <b>122</b> |                                                      |     | <b>WD</b> |      |          |     |           | <b>WD</b> | <b>WD</b>         |
| A*03:22                                                 | 03:22              |          |                                               | 0        | 0        | 11         | 0        | 0         | 0        | 0         | 11         |                                                      |     | WD        |      |          |     |           | WD        | WD                |
| A*03:22:01                                              | 03:22:01           | HLA02405 |                                               | 2        | 2        | 93         | 1        | 2         | 0        | 2         | 102        |                                                      |     | WD        |      |          |     |           | WD        | WD                |
| A*03:22:02                                              | 03:22:02           | HLA06873 |                                               | 0        | 0        | 9          | 0        | 0         | 0        | 0         | 9          |                                                      |     | WD        |      |          |     |           | WD        | WD                |
| <b>A*03:23 total</b>                                    | <b>03:23 total</b> |          |                                               | <b>0</b> | <b>0</b> | <b>12</b>  | <b>0</b> | <b>0</b>  | <b>0</b> | <b>0</b>  | <b>12</b>  |                                                      |     | <b>WD</b> |      |          |     |           | <b>WD</b> | <b>WD</b>         |
| A*03:23:01                                              | 03:23:01           | HLA02528 |                                               | 0        | 0        | 2          | 0        | 0         | 0        | 0         | 2          |                                                      |     |           |      |          |     |           |           |                   |
| A*03:23:02                                              | 03:23:02           | HLA06005 |                                               | 0        | 0        | 10         | 0        | 0         | 0        | 0         | 10         |                                                      |     | WD        |      |          |     |           | WD        | WD                |
| A*03:24                                                 | 03:24              | HLA02590 |                                               | 3        | 0        | 0          | 0        | 0         | 0        | 1         | 4          |                                                      |     |           |      |          |     |           |           |                   |
| A*03:25                                                 | 03:25              | HLA02683 |                                               | 0        | 0        | 10         | 0        | 0         | 0        | 0         | 10         |                                                      |     | WD        |      |          |     |           | WD        | WD                |

| Supplemental Table 8: HLA-A Allele Summary <sup>a</sup> |                    |          | Allele Count by Population Group <sup>b</sup> |          |          |          |          |          |          |          |          | 3.0.0 CIWD Category by Population Group <sup>c</sup> |     |      |      |     |     |     |       |                   |
|---------------------------------------------------------|--------------------|----------|-----------------------------------------------|----------|----------|----------|----------|----------|----------|----------|----------|------------------------------------------------------|-----|------|------|-----|-----|-----|-------|-------------------|
| Allele                                                  | Genomic Typing     | AlleleID | G group                                       | AFA      | API      | EURO     | MENA     | HIS      | NAM      | UNK      | Total    | AFA                                                  | API | EURO | MENA | HIS | NAM | UNK | Total | Highest Frequency |
| A*03:27                                                 | 03:27              | HLA02779 |                                               | 0        | 0        | 8        | 0        | 0        | 0        | 0        | 8        |                                                      |     | WD   |      |     |     |     | WD    | WD                |
| A*03:28                                                 | 03:28              | HLA02858 |                                               | 0        | 0        | 9        | 0        | 0        | 0        | 1        | 10       |                                                      |     | WD   |      |     |     |     | WD    | WD                |
| A*03:29                                                 | 03:29              | HLA02894 |                                               | 0        | 0        | 16       | 0        | 0        | 0        | 5        | 21       |                                                      |     | WD   |      |     |     | WD  | WD    | WD                |
| A*03:31                                                 | 03:31              | HLA03002 |                                               | 0        | 0        | 3        | 0        | 0        | 0        | 1        | 4        |                                                      |     |      |      |     |     |     |       |                   |
| A*03:33                                                 | 03:33              | HLA03082 |                                               | 0        | 0        | 249      | 1        | 3        | 0        | 15       | 268      |                                                      |     | I    |      |     |     | I   | I     | I                 |
| A*03:34                                                 | 03:34              | HLA03090 |                                               | 0        | 0        | 1        | 0        | 0        | 0        | 0        | 1        |                                                      |     |      |      |     |     |     |       |                   |
| A*03:36N                                                | 03:36N             | HLA03119 |                                               | 0        | 0        | 0        | 0        | 0        | 0        | 1        | 1        |                                                      |     |      |      |     |     |     |       |                   |
| A*03:38                                                 | 03:38              | HLA03140 |                                               | 0        | 0        | 5        | 0        | 0        | 0        | 0        | 5        |                                                      |     | WD   |      |     |     |     | WD    | WD                |
| A*03:41                                                 | 03:41              | HLA03435 |                                               | 0        | 1        | 0        | 0        | 0        | 0        | 0        | 1        |                                                      |     |      |      |     |     |     |       |                   |
| <b>A*03:44 total</b>                                    | <b>03:44 total</b> |          |                                               | <b>0</b> | <b>0</b> | <b>3</b> | <b>0</b> | <b>0</b> | <b>0</b> | <b>0</b> | <b>3</b> |                                                      |     |      |      |     |     |     |       |                   |
| A*03:44                                                 | 03:44              |          |                                               | 0        | 0        | 1        | 0        | 0        | 0        | 0        | 1        |                                                      |     |      |      |     |     |     |       |                   |
| A*03:44:01                                              | 03:44:01           | HLA03525 |                                               | 0        | 0        | 2        | 0        | 0        | 0        | 0        | 2        |                                                      |     |      |      |     |     |     |       |                   |
| A*03:46                                                 | 03:46              | HLA03568 |                                               | 0        | 0        | 5        | 0        | 0        | 0        | 0        | 5        |                                                      |     | WD   |      |     |     |     | WD    | WD                |
| A*03:47                                                 | 03:47              | HLA03654 |                                               | 0        | 0        | 31       | 0        | 0        | 1        | 3        | 35       |                                                      |     | WD   |      |     |     |     | WD    | WD                |
| A*03:48                                                 | 03:48              | HLA03667 |                                               | 0        | 0        | 37       | 0        | 0        | 0        | 0        | 37       |                                                      |     | WD   |      |     |     |     | WD    | WD                |
| A*03:49                                                 | 03:49              | HLA03668 |                                               | 0        | 0        | 9        | 0        | 0        | 0        | 1        | 10       |                                                      |     | WD   |      |     |     |     | WD    | WD                |
| A*03:50                                                 | 03:50              | HLA03709 |                                               | 0        | 0        | 53       | 0        | 0        | 0        | 2        | 55       |                                                      |     | WD   |      |     |     |     | WD    | WD                |
| A*03:51                                                 | 03:51              | HLA03710 |                                               | 13       | 0        | 0        | 0        | 0        | 0        | 2        | 15       | WD                                                   |     |      |      |     |     |     | WD    | WD                |
| A*03:52                                                 | 03:52              | HLA03870 |                                               | 0        | 0        | 2        | 0        | 0        | 0        | 1        | 3        |                                                      |     |      |      |     |     |     |       |                   |
| A*03:53                                                 | 03:53              | HLA03874 |                                               | 0        | 0        | 12       | 0        | 0        | 0        | 3        | 15       |                                                      |     | WD   |      |     |     |     | WD    | WD                |
| A*03:54                                                 | 03:54              | HLA03894 |                                               | 0        | 0        | 1        | 0        | 0        | 0        | 0        | 1        |                                                      |     |      |      |     |     |     |       |                   |
| A*03:55                                                 | 03:55              | HLA03914 |                                               | 0        | 0        | 3        | 0        | 0        | 0        | 0        | 3        |                                                      |     |      |      |     |     |     |       |                   |
| A*03:56                                                 | 03:56              | HLA03917 |                                               | 0        | 0        | 11       | 0        | 0        | 0        | 2        | 13       |                                                      |     | WD   |      |     |     |     | WD    | WD                |
| A*03:57                                                 | 03:57              | HLA03922 |                                               | 1        | 0        | 4        | 0        | 0        | 0        | 0        | 5        |                                                      |     |      |      |     |     |     | WD    | WD                |
| A*03:58                                                 | 03:58              | HLA03929 |                                               | 0        | 0        | 1        | 0        | 0        | 0        | 0        | 1        |                                                      |     |      |      |     |     |     |       |                   |
| A*03:59                                                 | 03:59              | HLA03931 |                                               | 0        | 0        | 3        | 0        | 0        | 0        | 1        | 4        |                                                      |     |      |      |     |     |     |       |                   |
| A*03:62                                                 | 03:62              | HLA04142 |                                               | 0        | 1        | 12       | 0        | 0        | 0        | 5        | 18       |                                                      |     | WD   |      |     |     | WD  | WD    | WD                |
| A*03:63                                                 | 03:63              | HLA04490 |                                               | 0        | 0        | 6        | 0        | 0        | 0        | 2        | 8        |                                                      |     | WD   |      |     |     |     | WD    | WD                |
| A*03:65                                                 | 03:65              | HLA04528 |                                               | 0        | 0        | 7        | 0        | 0        | 0        | 0        | 7        |                                                      |     | WD   |      |     |     |     | WD    | WD                |
| A*03:67                                                 | 03:67              | HLA04559 |                                               | 0        | 0        | 1        | 0        | 0        | 0        | 0        | 1        |                                                      |     |      |      |     |     |     |       |                   |



| Supplemental Table 8: HLA-A Allele Summary <sup>a</sup> |                     |          | Allele Count by Population Group <sup>b</sup> |          |          |           |          |          |          |          |           | 3.0.0 CIWD Category by Population Group <sup>c</sup> |     |           |      |     |     |     |           |                   |    |  |
|---------------------------------------------------------|---------------------|----------|-----------------------------------------------|----------|----------|-----------|----------|----------|----------|----------|-----------|------------------------------------------------------|-----|-----------|------|-----|-----|-----|-----------|-------------------|----|--|
| Allele                                                  | Genomic Typing      | AlleleID | G group                                       | AFA      | API      | EURO      | MENA     | HIS      | NAM      | UNK      | Total     | AFA                                                  | API | EURO      | MENA | HIS | NAM | UNK | Total     | Highest Frequency |    |  |
| A*03:68N                                                | 03:68N              | HLA04561 |                                               | 0        | 0        | 2         | 0        | 0        | 0        | 0        | 2         |                                                      |     |           |      |     |     |     |           |                   |    |  |
| A*03:69N                                                | 03:69N              | HLA04562 |                                               | 0        | 0        | 3         | 0        | 0        | 0        | 0        | 3         |                                                      |     |           |      |     |     |     |           |                   |    |  |
| A*03:71                                                 | 03:71               | HLA04578 |                                               | 0        | 0        | 1         | 1        | 0        | 0        | 0        | 2         |                                                      |     |           |      |     |     |     |           |                   |    |  |
| A*03:72                                                 | 03:72               | HLA04636 |                                               | 0        | 0        | 3         | 0        | 0        | 0        | 0        | 3         |                                                      |     |           |      |     |     |     |           |                   |    |  |
| A*03:74                                                 | 03:74               | HLA04647 |                                               | 0        | 0        | 70        | 0        | 0        | 0        | 0        | 70        |                                                      |     | WD        |      |     |     |     | WD        | WD                |    |  |
| A*03:77                                                 | 03:77               | HLA05232 |                                               | 0        | 1        | 0         | 0        | 0        | 0        | 0        | 1         |                                                      |     |           |      |     |     |     |           |                   |    |  |
| A*03:79                                                 | 03:79               | HLA05314 |                                               | 0        | 0        | 2         | 0        | 0        | 0        | 0        | 2         |                                                      |     |           |      |     |     |     |           |                   |    |  |
| A*03:81                                                 | 03:81               | HLA05336 |                                               | 0        | 0        | 13        | 0        | 1        | 0        | 0        | 14        |                                                      |     | WD        |      |     |     |     | WD        | WD                |    |  |
| A*03:85                                                 | 03:85               | HLA05441 |                                               | 0        | 0        | 0         | 1        | 0        | 0        | 0        | 1         |                                                      |     |           |      |     |     |     |           |                   |    |  |
| A*03:86                                                 | 03:86               | HLA05456 |                                               | 0        | 0        | 5         | 0        | 0        | 0        | 0        | 5         |                                                      |     | WD        |      |     |     |     | WD        | WD                |    |  |
| A*03:87                                                 | 03:87               | HLA05462 |                                               | 0        | 0        | 7         | 0        | 0        | 0        | 0        | 7         |                                                      |     | WD        |      |     |     |     | WD        | WD                |    |  |
| A*03:88                                                 | 03:88               | HLA05547 |                                               | 0        | 0        | 2         | 0        | 1        | 0        | 1        | 4         |                                                      |     |           |      |     |     |     |           |                   |    |  |
| <b>A*03:89 total</b>                                    | <b>03:89 total</b>  |          |                                               | <b>1</b> | <b>0</b> | <b>35</b> | <b>0</b> | <b>4</b> | <b>0</b> | <b>1</b> | <b>41</b> |                                                      |     | <b>WD</b> |      |     |     |     | <b>WD</b> | <b>WD</b>         |    |  |
| A*03:89                                                 | 03:89               |          |                                               | 1        | 0        | 33        | 0        | 3        | 0        | 1        | 38        |                                                      |     | WD        |      |     |     |     | WD        | WD                |    |  |
| A*03:89:01                                              | 03:89:01            | HLA05552 |                                               | 0        | 0        | 2         | 0        | 1        | 0        | 0        | 3         |                                                      |     |           |      |     |     |     |           |                   |    |  |
| A*03:92                                                 | 03:92               | HLA05631 |                                               | 0        | 0        | 2         | 0        | 0        | 0        | 0        | 2         |                                                      |     |           |      |     |     |     |           |                   |    |  |
| A*03:93                                                 | 03:93               | HLA05636 |                                               | 0        | 0        | 19        | 0        | 0        | 0        | 2        | 21        |                                                      |     | WD        |      |     |     |     | WD        | WD                |    |  |
| A*03:94                                                 | 03:94               | HLA05638 |                                               | 0        | 0        | 15        | 0        | 0        | 0        | 0        | 15        |                                                      |     | WD        |      |     |     |     | WD        | WD                |    |  |
| A*03:95                                                 | 03:95               | HLA05643 |                                               | 0        | 0        | 1         | 0        | 0        | 0        | 0        | 1         |                                                      |     |           |      |     |     |     |           |                   |    |  |
| A*03:96                                                 | 03:96               | HLA05646 |                                               | 0        | 2        | 0         | 0        | 0        | 0        | 2        | 4         |                                                      |     |           |      |     |     |     |           |                   |    |  |
| A*03:97                                                 | 03:97               | HLA05647 |                                               | 0        | 0        | 4         | 0        | 0        | 0        | 0        | 4         |                                                      |     |           |      |     |     |     |           |                   |    |  |
| A*03:98                                                 | 03:98               | HLA05651 |                                               | 0        | 0        | 1         | 0        | 0        | 0        | 0        | 1         |                                                      |     |           |      |     |     |     |           |                   |    |  |
| A*03:99                                                 | 03:99               | HLA05653 |                                               | 0        | 0        | 2         | 0        | 0        | 0        | 0        | 2         |                                                      |     |           |      |     |     |     |           |                   |    |  |
| A*03:100                                                | 03:100              | HLA05663 |                                               | 0        | 0        | 0         | 1        | 0        | 0        | 0        | 1         |                                                      |     |           |      |     |     |     |           |                   |    |  |
| A*03:101                                                | 03:101              | HLA05664 |                                               | 0        | 0        | 1         | 0        | 0        | 0        | 0        | 1         |                                                      |     |           |      |     |     |     |           |                   |    |  |
| A*03:102                                                | 03:102              | HLA05675 |                                               | 0        | 0        | 11        | 0        | 0        | 0        | 0        | 11        |                                                      |     | WD        |      |     |     |     | WD        | WD                |    |  |
| <b>A*03:103 total</b>                                   | <b>03:103 total</b> |          |                                               | <b>0</b> | <b>1</b> | <b>4</b>  | <b>0</b> | <b>0</b> | <b>0</b> | <b>0</b> | <b>5</b>  |                                                      |     |           |      |     |     |     | <b>WD</b> | <b>WD</b>         |    |  |
| A*03:103                                                | 03:103              |          |                                               | 0        | 1        | 4         | 0        | 0        | 0        | 0        | 5         |                                                      |     |           |      |     |     |     |           | WD                | WD |  |
| A*03:105                                                | 03:105              | HLA05701 |                                               | 0        | 0        | 2         | 0        | 0        | 0        | 0        | 2         |                                                      |     |           |      |     |     |     |           |                   |    |  |
| A*03:107                                                | 03:107              | HLA05704 |                                               | 0        | 0        | 9         | 0        | 0        | 0        | 0        | 9         |                                                      |     | WD        |      |     |     |     | WD        | WD                |    |  |

| Supplemental Table 8: HLA-A Allele Summary <sup>a</sup> |                     |          | Allele Count by Population Group <sup>b</sup> |          |          |           |          |          |          |          |           | 3.0.0 CIWD Category by Population Group <sup>c</sup> |     |           |      |     |     |     |           |                   |
|---------------------------------------------------------|---------------------|----------|-----------------------------------------------|----------|----------|-----------|----------|----------|----------|----------|-----------|------------------------------------------------------|-----|-----------|------|-----|-----|-----|-----------|-------------------|
| Allele                                                  | Genomic Typing      | AlleleID | G group                                       | AFA      | API      | EURO      | MENA     | HIS      | NAM      | UNK      | Total     | AFA                                                  | API | EURO      | MENA | HIS | NAM | UNK | Total     | Highest Frequency |
| A*03:108                                                | 03:108              | HLA05705 |                                               | 0        | 0        | 7         | 1        | 0        | 0        | 0        | 8         |                                                      |     | WD        |      |     |     |     | WD        | WD                |
| A*03:110                                                | 03:110              | HLA05724 |                                               | 0        | 0        | 1         | 0        | 0        | 0        | 0        | 1         |                                                      |     |           |      |     |     |     |           |                   |
| A*03:111                                                | 03:111              | HLA05730 |                                               | 0        | 0        | 6         | 0        | 0        | 0        | 0        | 6         |                                                      |     | WD        |      |     |     |     | WD        | WD                |
| A*03:113                                                | 03:113              | HLA05935 |                                               | 0        | 1        | 0         | 0        | 0        | 0        | 0        | 1         |                                                      |     |           |      |     |     |     |           |                   |
| A*03:115                                                | 03:115              | HLA05990 |                                               | 0        | 0        | 1         | 0        | 0        | 0        | 0        | 1         |                                                      |     |           |      |     |     |     |           |                   |
| A*03:116                                                | 03:116              | HLA06095 |                                               | 0        | 0        | 0         | 0        | 0        | 0        | 1        | 1         |                                                      |     |           |      |     |     |     |           |                   |
| A*03:119                                                | 03:119              | HLA06550 |                                               | 0        | 0        | 2         | 0        | 1        | 0        | 0        | 3         |                                                      |     |           |      |     |     |     |           |                   |
| A*03:120                                                | 03:120              | HLA06551 |                                               | 0        | 0        | 6         | 0        | 0        | 0        | 0        | 6         |                                                      |     | WD        |      |     |     |     | WD        | WD                |
| A*03:122                                                | 03:122              | HLA06560 |                                               | 0        | 0        | 1         | 0        | 0        | 0        | 0        | 1         |                                                      |     |           |      |     |     |     |           |                   |
| <b>A*03:123 total</b>                                   | <b>03:123 total</b> |          |                                               | <b>0</b> | <b>0</b> | <b>31</b> | <b>0</b> | <b>0</b> | <b>0</b> | <b>4</b> | <b>35</b> |                                                      |     | <b>WD</b> |      |     |     |     | <b>WD</b> | <b>WD</b>         |
| A*03:123                                                | 03:123              |          |                                               | 0        | 0        | 2         | 0        | 0        | 0        | 0        | 2         |                                                      |     |           |      |     |     |     |           |                   |
| A*03:123:01                                             | 03:123:01           | HLA06771 |                                               | 0        | 0        | 29        | 0        | 0        | 0        | 4        | 33        |                                                      |     | WD        |      |     |     |     | WD        | WD                |
| A*03:124                                                | 03:124              | HLA06753 |                                               | 0        | 0        | 2         | 0        | 0        | 0        | 0        | 2         |                                                      |     |           |      |     |     |     |           |                   |
| A*03:125                                                | 03:125              | HLA06755 |                                               | 0        | 0        | 1         | 0        | 0        | 0        | 1        | 2         |                                                      |     |           |      |     |     |     |           |                   |
| A*03:126                                                | 03:126              | HLA06788 |                                               | 0        | 0        | 2         | 0        | 0        | 0        | 0        | 2         |                                                      |     |           |      |     |     |     |           |                   |
| A*03:127                                                | 03:127              | HLA06804 |                                               | 0        | 0        | 0         | 0        | 0        | 0        | 2        | 2         |                                                      |     |           |      |     |     |     |           |                   |
| A*03:128                                                | 03:128              | HLA06881 |                                               | 0        | 0        | 2         | 0        | 0        | 0        | 0        | 2         |                                                      |     |           |      |     |     |     |           |                   |
| A*03:130                                                | 03:130              | HLA06910 |                                               | 0        | 0        | 1         | 0        | 0        | 0        | 0        | 1         |                                                      |     |           |      |     |     |     |           |                   |
| A*03:133                                                | 03:133              | HLA07297 |                                               | 1        | 0        | 0         | 0        | 0        | 0        | 0        | 1         |                                                      |     |           |      |     |     |     |           |                   |
| A*03:135                                                | 03:135              | HLA07405 |                                               | 0        | 0        | 1         | 0        | 0        | 0        | 0        | 1         |                                                      |     |           |      |     |     |     |           |                   |
| A*03:136                                                | 03:136              | HLA07427 |                                               | 0        | 0        | 1         | 0        | 0        | 0        | 0        | 1         |                                                      |     |           |      |     |     |     |           |                   |
| A*03:137                                                | 03:137              | HLA07595 |                                               | 0        | 1        | 1         | 0        | 0        | 0        | 0        | 2         |                                                      |     |           |      |     |     |     |           |                   |
| A*03:139                                                | 03:139              | HLA07600 |                                               | 0        | 0        | 1         | 0        | 1        | 0        | 1        | 3         |                                                      |     |           |      |     |     |     |           |                   |
| A*03:140                                                | 03:140              | HLA07601 |                                               | 0        | 0        | 0         | 0        | 2        | 0        | 0        | 2         |                                                      |     |           |      |     |     |     |           |                   |
| A*03:141                                                | 03:141              | HLA07675 |                                               | 0        | 0        | 1         | 0        | 0        | 0        | 0        | 1         |                                                      |     |           |      |     |     |     |           |                   |
| A*03:142                                                | 03:142              | HLA07676 |                                               | 0        | 3        | 0         | 0        | 0        | 0        | 0        | 3         |                                                      |     |           |      |     |     |     |           |                   |
| A*03:144                                                | 03:144              | HLA07990 |                                               | 0        | 0        | 6         | 0        | 0        | 0        | 0        | 6         |                                                      |     | WD        |      |     |     |     | WD        | WD                |
| A*03:147                                                | 03:147              | HLA07999 |                                               | 0        | 0        | 2         | 0        | 0        | 0        | 0        | 2         |                                                      |     |           |      |     |     |     |           |                   |
| A*03:149                                                | 03:149              | HLA08001 |                                               | 0        | 0        | 5         | 0        | 0        | 0        | 0        | 5         |                                                      |     | WD        |      |     |     |     | WD        | WD                |
| A*03:150                                                | 03:150              | HLA08020 |                                               | 0        | 0        | 1         | 0        | 0        | 0        | 0        | 1         |                                                      |     |           |      |     |     |     |           |                   |

| Supplemental Table 8: HLA-A Allele Summary <sup>a</sup> |                     |          | Allele Count by Population Group <sup>b</sup> |          |          |          |          |          |          |          |          | 3.0.0 CIWD Category by Population Group <sup>c</sup> |     |           |           |     |     |     |           |                   |  |
|---------------------------------------------------------|---------------------|----------|-----------------------------------------------|----------|----------|----------|----------|----------|----------|----------|----------|------------------------------------------------------|-----|-----------|-----------|-----|-----|-----|-----------|-------------------|--|
| Allele                                                  | Genomic Typing      | AlleleID | G group                                       | AFA      | API      | EURO     | MENA     | HIS      | NAM      | UNK      | Total    | AFA                                                  | API | EURO      | MENA      | HIS | NAM | UNK | Total     | Highest Frequency |  |
| A*03:151                                                | 03:151              | HLA08281 |                                               | 0        | 2        | 0        | 0        | 0        | 0        | 0        | 2        |                                                      |     |           |           |     |     |     |           |                   |  |
| A*03:153                                                | 03:153              | HLA08449 |                                               | 0        | 0        | 1        | 0        | 0        | 0        | 0        | 1        |                                                      |     |           |           |     |     |     |           |                   |  |
| <b>A*03:154 total</b>                                   | <b>03:154 total</b> |          |                                               | <b>0</b> | <b>2</b> | <b>4</b> | <b>0</b> | <b>0</b> | <b>0</b> | <b>1</b> | <b>7</b> |                                                      |     |           |           |     |     |     | <b>WD</b> | <b>WD</b>         |  |
| A*03:154                                                | 03:154              |          |                                               | 0        | 2        | 3        | 0        | 0        | 0        | 1        | 6        |                                                      |     |           |           |     |     |     | <b>WD</b> | <b>WD</b>         |  |
| A*03:154:01                                             | 03:154:01           | HLA08451 |                                               | 0        | 0        | 1        | 0        | 0        | 0        | 0        | 1        |                                                      |     |           |           |     |     |     |           |                   |  |
| A*03:155                                                | 03:155              | HLA08452 |                                               | 0        | 0        | 1        | 0        | 0        | 0        | 0        | 1        |                                                      |     |           |           |     |     |     |           |                   |  |
| <b>A*03:157 total</b>                                   | <b>03:157 total</b> |          |                                               | <b>0</b> | <b>0</b> | <b>6</b> | <b>0</b> | <b>0</b> | <b>0</b> | <b>0</b> | <b>6</b> |                                                      |     | <b>WD</b> |           |     |     |     | <b>WD</b> | <b>WD</b>         |  |
| A*03:157:01                                             | 03:157:01           | HLA08487 |                                               | 0        | 0        | 2        | 0        | 0        | 0        | 0        | 2        |                                                      |     |           |           |     |     |     |           |                   |  |
| A*03:157:02                                             | 03:157:02           | HLA12465 |                                               | 0        | 0        | 4        | 0        | 0        | 0        | 0        | 4        |                                                      |     |           |           |     |     |     |           |                   |  |
| A*03:158                                                | 03:158              | HLA08490 |                                               | 1        | 0        | 0        | 0        | 0        | 0        | 0        | 1        |                                                      |     |           |           |     |     |     |           |                   |  |
| A*03:163                                                | 03:163              | HLA09337 |                                               | 0        | 0        | 1        | 0        | 0        | 0        | 1        | 2        |                                                      |     |           |           |     |     |     |           |                   |  |
| A*03:166                                                | 03:166              | HLA09420 |                                               | 0        | 0        | 1        | 0        | 0        | 0        | 0        | 1        |                                                      |     |           |           |     |     |     |           |                   |  |
| A*03:167                                                | 03:167              | HLA09497 |                                               | 0        | 0        | 4        | 1        | 0        | 0        | 0        | 5        |                                                      |     |           |           |     |     |     | <b>WD</b> | <b>WD</b>         |  |
| A*03:172                                                | 03:172              | HLA09804 |                                               | 0        | 0        | 3        | 0        | 0        | 0        | 0        | 3        |                                                      |     |           |           |     |     |     |           |                   |  |
| A*03:173                                                | 03:173              | HLA09805 |                                               | 0        | 0        | 3        | 0        | 0        | 0        | 0        | 3        |                                                      |     |           |           |     |     |     |           |                   |  |
| A*03:174                                                | 03:174              | HLA09806 |                                               | 0        | 2        | 0        | 0        | 0        | 0        | 0        | 2        |                                                      |     |           |           |     |     |     |           |                   |  |
| A*03:176                                                | 03:176              | HLA10387 |                                               | 0        | 0        | 3        | 0        | 0        | 0        | 0        | 3        |                                                      |     |           |           |     |     |     |           |                   |  |
| A*03:177                                                | 03:177              | HLA10388 |                                               | 0        | 0        | 0        | 0        | 0        | 0        | 1        | 1        |                                                      |     |           |           |     |     |     |           |                   |  |
| A*03:180                                                | 03:180              | HLA10398 |                                               | 0        | 0        | 1        | 0        | 0        | 0        | 0        | 1        |                                                      |     |           |           |     |     |     |           |                   |  |
| A*03:185                                                | 03:185              | HLA10982 |                                               | 1        | 0        | 0        | 0        | 0        | 0        | 0        | 1        |                                                      |     |           |           |     |     |     |           |                   |  |
| A*03:186                                                | 03:186              | HLA11310 |                                               | 0        | 0        | 0        | 0        | 0        | 0        | 2        | 2        |                                                      |     |           |           |     |     |     |           |                   |  |
| A*03:188                                                | 03:188              | HLA11314 |                                               | 0        | 0        | 2        | 0        | 0        | 0        | 0        | 2        |                                                      |     |           |           |     |     |     |           |                   |  |
| A*03:191                                                | 03:191              | HLA11805 |                                               | 0        | 0        | 2        | 0        | 0        | 0        | 0        | 2        |                                                      |     |           |           |     |     |     |           |                   |  |
| A*03:192N                                               | 03:192N             | HLA11992 |                                               | 0        | 0        | 1        | 0        | 0        | 0        | 0        | 1        |                                                      |     |           |           |     |     |     |           |                   |  |
| A*03:195                                                | 03:195              | HLA11965 |                                               | 0        | 0        | 2        | 0        | 0        | 0        | 0        | 2        |                                                      |     |           |           |     |     |     |           |                   |  |
| A*03:197N                                               | 03:197N             | HLA11970 |                                               | 0        | 0        | 0        | 1        | 0        | 0        | 0        | 1        |                                                      |     |           |           |     |     |     |           |                   |  |
| A*03:198                                                | 03:198              | HLA12082 |                                               | 0        | 0        | 0        | 1        | 0        | 0        | 0        | 1        |                                                      |     |           |           |     |     |     |           |                   |  |
| A*03:201                                                | 03:201              | HLA12247 |                                               | 0        | 0        | 0        | 0        | 1        | 0        | 1        | 2        |                                                      |     |           |           |     |     |     |           |                   |  |
| A*03:202                                                | 03:202              | HLA12250 |                                               | 0        | 0        | 1        | 13       | 0        | 0        | 0        | 14       |                                                      |     |           | <b>WD</b> |     |     |     | <b>WD</b> | <b>WD</b>         |  |
| A*03:204                                                | 03:204              | HLA12400 |                                               | 0        | 0        | 1        | 0        | 0        | 0        | 0        | 1        |                                                      |     |           |           |     |     |     |           |                   |  |

| Supplemental Table 8: HLA-A Allele Summary <sup>a</sup> |                        |          | Allele Count by Population Group <sup>b</sup> |             |               |               |              |              |             |              |               | 3.0.0 CIWD Category by Population Group <sup>c</sup> |          |          |          |          |          |          |          |                   |          |          |
|---------------------------------------------------------|------------------------|----------|-----------------------------------------------|-------------|---------------|---------------|--------------|--------------|-------------|--------------|---------------|------------------------------------------------------|----------|----------|----------|----------|----------|----------|----------|-------------------|----------|----------|
| Allele                                                  | Genomic Typing         | AlleleID | G group                                       | AFA         | API           | EURO          | MENA         | HIS          | NAM         | UNK          | Total         | AFA                                                  | API      | EURO     | MENA     | HIS      | NAM      | UNK      | Total    | Highest Frequency |          |          |
| A*03:206                                                | 03:206                 | HLA12461 |                                               | 0           | 0             | 0             | 0            | 1            | 0           | 0            | 1             |                                                      |          |          |          |          |          |          |          |                   |          |          |
| A*03:207                                                | 03:207                 | HLA12552 |                                               | 0           | 0             | 1             | 0            | 0            | 0           | 1            | 2             |                                                      |          |          |          |          |          |          |          |                   |          |          |
| A*03:210                                                | 03:210                 | HLA12958 |                                               | 0           | 0             | 2             | 0            | 0            | 0           | 0            | 2             |                                                      |          |          |          |          |          |          |          |                   |          |          |
| A*03:212                                                | 03:212                 | HLA12965 |                                               | 0           | 0             | 1             | 0            | 0            | 0           | 0            | 1             |                                                      |          |          |          |          |          |          |          |                   |          |          |
| A*03:213                                                | 03:213                 | HLA12966 |                                               | 0           | 0             | 3             | 0            | 0            | 0           | 1            | 4             |                                                      |          |          |          |          |          |          |          |                   |          |          |
| A*03:214                                                | 03:214                 | HLA12967 |                                               | 1           | 0             | 1             | 0            | 0            | 0           | 0            | 2             |                                                      |          |          |          |          |          |          |          |                   |          |          |
| A*03:215                                                | 03:215                 | HLA12968 |                                               | 0           | 2             | 2             | 0            | 0            | 0           | 0            | 4             |                                                      |          |          |          |          |          |          |          |                   |          |          |
| A*03:216                                                | 03:216                 | HLA12969 |                                               | 0           | 0             | 0             | 5            | 0            | 0           | 0            | 5             |                                                      |          |          | WD       |          |          |          | WD       |                   | WD       | WD       |
| A*03:217                                                | 03:217                 | HLA12972 |                                               | 0           | 2             | 0             | 0            | 0            | 0           | 0            | 2             |                                                      |          |          |          |          |          |          |          |                   |          |          |
| A*03:219                                                | 03:219                 | HLA13079 |                                               | 0           | 0             | 0             | 1            | 0            | 0           | 0            | 1             |                                                      |          |          |          |          |          |          |          |                   |          |          |
| A*03:224                                                | 03:224                 | HLA13619 |                                               | 0           | 0             | 1             | 0            | 0            | 0           | 0            | 1             |                                                      |          |          |          |          |          |          |          |                   |          |          |
| A*03:226                                                | 03:226                 | HLA13647 |                                               | 0           | 0             | 1             | 0            | 0            | 0           | 0            | 1             |                                                      |          |          |          |          |          |          |          |                   |          |          |
| A*03:227                                                | 03:227                 | HLA13701 |                                               | 0           | 0             | 1             | 0            | 0            | 0           | 0            | 1             |                                                      |          |          |          |          |          |          |          |                   |          |          |
| A*03:228                                                | 03:228                 | HLA13730 |                                               | 0           | 5             | 0             | 0            | 0            | 0           | 0            | 5             |                                                      | WD       |          |          |          |          |          | WD       |                   | WD       | WD       |
| A*03:230                                                | 03:230                 | HLA13847 |                                               | 0           | 0             | 1             | 0            | 0            | 0           | 0            | 1             |                                                      |          |          |          |          |          |          |          |                   |          |          |
| A*03:233                                                | 03:233                 | HLA14129 |                                               | 1           | 0             | 0             | 0            | 0            | 0           | 1            | 2             |                                                      |          |          |          |          |          |          |          |                   |          |          |
| A*03:238                                                | 03:238                 | HLA14506 |                                               | 0           | 0             | 1             | 0            | 0            | 0           | 0            | 1             |                                                      |          |          |          |          |          |          |          |                   |          |          |
| A*03:243                                                | 03:243                 | HLA14704 |                                               | 0           | 0             | 1             | 0            | 0            | 0           | 0            | 1             |                                                      |          |          |          |          |          |          |          |                   |          |          |
| A*03:245                                                | 03:245                 | HLA14717 |                                               | 0           | 0             | 0             | 0            | 0            | 0           | 1            | 1             |                                                      |          |          |          |          |          |          |          |                   |          |          |
| A*03:251                                                | 03:251                 | HLA15521 |                                               | 0           | 0             | 1             | 0            | 0            | 0           | 0            | 1             |                                                      |          |          |          |          |          |          |          |                   |          |          |
| A*03:258                                                | 03:258                 | HLA15819 |                                               | 0           | 0             | 1             | 0            | 0            | 0           | 0            | 1             |                                                      |          |          |          |          |          |          |          |                   |          |          |
| A*03:261                                                | 03:261                 | HLA15836 |                                               | 0           | 0             | 1             | 0            | 0            | 0           | 0            | 1             |                                                      |          |          |          |          |          |          |          |                   |          |          |
| A*03:262N                                               | 03:262N                | HLA15840 |                                               | 0           | 0             | 1             | 0            | 0            | 0           | 0            | 1             |                                                      |          |          |          |          |          |          |          |                   |          |          |
| A*03:266N                                               | 03:266N                | HLA16071 |                                               | 0           | 0             | 4             | 0            | 0            | 0           | 0            | 4             |                                                      |          |          |          |          |          |          |          |                   |          |          |
| A*03:271                                                | 03:271                 | HLA16204 |                                               | 0           | 0             | 1             | 0            | 0            | 0           | 0            | 1             |                                                      |          |          |          |          |          |          |          |                   |          |          |
| A*03:CODE                                               | 03:CODE                |          |                                               | 3548        | 1721          | 105344        | 1832         | 6316         | 587         | 12119        | 131467        | NA                                                   | NA       | NA       | NA       | NA       | NA       | NA       | NA       | NA                | NA       | NA       |
| <b>A*11:01 total</b>                                    | <b>11:01 total</b>     |          |                                               | <b>5016</b> | <b>206873</b> | <b>637496</b> | <b>26855</b> | <b>29261</b> | <b>2630</b> | <b>73685</b> | <b>981816</b> | <b>C</b>                                             | <b>C</b> | <b>C</b> | <b>C</b> | <b>C</b> | <b>C</b> | <b>C</b> | <b>C</b> | <b>C</b>          | <b>C</b> | <b>C</b> |
| A*11:01                                                 | 11:01                  |          |                                               | 3           | 35            | 3310          | 12           | 15           | 0           | 161          | 3536          |                                                      | I        | C        | WD       | I        |          |          | C        | C                 | C        | C        |
| A*11:01P                                                | 11:01P                 |          |                                               | 0           | 7             | 752           | 3            | 4            | 0           | 3            | 769           |                                                      | WD       | I        |          |          |          |          | I        | I                 | I        | I        |
| <b>A*11:01:01G total</b>                                | <b>11:01:01G total</b> |          |                                               | <b>5010</b> | <b>206642</b> | <b>633330</b> | <b>26837</b> | <b>29241</b> | <b>2630</b> | <b>73502</b> | <b>977192</b> | <b>C</b>                                             | <b>C</b> | <b>C</b> | <b>C</b> | <b>C</b> | <b>C</b> | <b>C</b> | <b>C</b> | <b>C</b>          | <b>C</b> | <b>C</b> |

| Supplemental Table 8: HLA-A Allele Summary <sup>a</sup> |                |          | Allele Count by Population Group <sup>b</sup> |      |        |        |       |       |      |       |        | 3.0.0 CIWD Category by Population Group <sup>c</sup> |     |      |      |     |     |     |       |                   |    |
|---------------------------------------------------------|----------------|----------|-----------------------------------------------|------|--------|--------|-------|-------|------|-------|--------|------------------------------------------------------|-----|------|------|-----|-----|-----|-------|-------------------|----|
| Allele                                                  | Genomic Typing | AlleleID | G group                                       | AFA  | API    | EURO   | MENA  | HIS   | NAM  | UNK   | Total  | AFA                                                  | API | EURO | MENA | HIS | NAM | UNK | Total | Highest Frequency |    |
| A*11:01:01G                                             | 11:01:01G      |          | 11:01:01G                                     | 3842 | 186234 | 598969 | 26029 | 20246 | 1927 | 64911 | 902158 | C                                                    | C   | C    | C    | C   | C   | C   | C     | C                 | C  |
| A*11:01:01                                              | 11:01:01       |          | 11:01:01G                                     | 455  | 8906   | 12936  | 313   | 3685  | 300  | 4273  | 30868  | C                                                    | C   | C    | C    | C   | C   | C   | C     | C                 | C  |
| A*11:01:01:01                                           | 11:01:01:01    | HLA00043 | 11:01:01G                                     | 713  | 11495  | 21418  | 495   | 5296  | 403  | 4314  | 44134  | C                                                    | C   | C    | C    | C   | C   | C   | C     | C                 | C  |
| A*11:21N                                                | 11:21N         | HLA02052 | 11:01:01G                                     | 0    | 2      | 1      | 0     | 0     | 0    | 2     | 5      |                                                      |     |      |      |     |     |     |       | WD                | WD |
| A*11:86                                                 | 11:86          | HLA06027 | 11:01:01G                                     | 0    | 0      | 4      | 0     | 0     | 0    | 1     | 5      |                                                      |     |      |      |     |     |     |       | WD                | WD |
| A*11:102                                                | 11:102         | HLA06527 | 11:01:01G                                     | 0    | 1      | 0      | 0     | 0     | 0    | 0     | 1      |                                                      |     |      |      |     |     |     |       |                   |    |
| A*11:108                                                | 11:108         | HLA07288 | 11:01:01G                                     | 0    | 1      | 1      | 0     | 14    | 0    | 1     | 17     |                                                      |     |      |      | I   |     |     |       | WD                | I  |
| A*11:126                                                | 11:126         | HLA08104 | 11:01:01G                                     | 0    | 2      | 1      | 0     | 0     | 0    | 0     | 3      |                                                      |     |      |      |     |     |     |       |                   |    |
| A*11:129                                                | 11:129         | HLA08309 | 11:01:01G                                     | 0    | 1      | 0      | 0     | 0     | 0    | 0     | 1      |                                                      |     |      |      |     |     |     |       |                   |    |
| A*11:01:02                                              | 11:01:02       | HLA01037 |                                               | 0    | 46     | 0      | 0     | 0     | 0    | 1     | 47     |                                                      | I   |      |      |     |     |     |       | WD                | I  |
| A*11:01:04                                              | 11:01:04       | HLA02025 |                                               | 1    | 40     | 0      | 0     | 0     | 0    | 4     | 45     |                                                      | I   |      |      |     |     |     |       | WD                | I  |
| A*11:01:05                                              | 11:01:05       | HLA02216 |                                               | 0    | 5      | 1      | 0     | 0     | 0    | 2     | 8      |                                                      | WD  |      |      |     |     |     |       | WD                | WD |
| A*11:01:06                                              | 11:01:06       | HLA02723 |                                               | 0    | 17     | 0      | 0     | 0     | 0    | 0     | 17     |                                                      | I   |      |      |     |     |     |       | WD                | I  |
| A*11:01:07                                              | 11:01:07       | HLA02829 |                                               | 0    | 6      | 1      | 1     | 0     | 0    | 0     | 8      |                                                      | WD  |      |      |     |     |     |       | WD                | WD |
| A*11:01:08                                              | 11:01:08       | HLA03124 |                                               | 0    | 0      | 11     | 0     | 0     | 0    | 0     | 11     |                                                      |     | WD   |      |     |     |     |       | WD                | WD |
| A*11:01:10                                              | 11:01:10       | HLA03494 |                                               | 0    | 0      | 0      | 0     | 0     | 0    | 1     | 1      |                                                      |     |      |      |     |     |     |       |                   |    |
| A*11:01:11                                              | 11:01:11       | HLA03803 |                                               | 0    | 0      | 15     | 0     | 1     | 0    | 0     | 16     |                                                      |     | WD   |      |     |     |     |       | WD                | WD |
| A*11:01:13                                              | 11:01:13       | HLA03910 |                                               | 0    | 20     | 2      | 0     | 0     | 0    | 6     | 28     |                                                      | I   |      |      |     |     | WD  | WD    | I                 |    |
| A*11:01:14                                              | 11:01:14       | HLA03928 |                                               | 0    | 1      | 2      | 0     | 0     | 0    | 0     | 3      |                                                      |     |      |      |     |     |     |       |                   |    |
| A*11:01:15                                              | 11:01:15       | HLA04476 |                                               | 0    | 3      | 28     | 0     | 0     | 0    | 3     | 34     |                                                      |     | WD   |      |     |     |     |       | WD                | WD |
| A*11:01:17                                              | 11:01:17       | HLA04855 |                                               | 0    | 0      | 9      | 0     | 0     | 0    | 1     | 10     |                                                      |     | WD   |      |     |     |     |       | WD                | WD |
| A*11:01:19                                              | 11:01:19       | HLA05246 |                                               | 0    | 2      | 0      | 0     | 0     | 0    | 0     | 2      |                                                      |     |      |      |     |     |     |       |                   |    |
| A*11:01:20                                              | 11:01:20       | HLA05318 |                                               | 0    | 0      | 1      | 0     | 0     | 0    | 0     | 1      |                                                      |     |      |      |     |     |     |       |                   |    |
| A*11:01:24                                              | 11:01:24       | HLA05540 |                                               | 0    | 1      | 0      | 0     | 0     | 0    | 0     | 1      |                                                      |     |      |      |     |     |     |       |                   |    |
| A*11:01:25                                              | 11:01:25       | HLA05629 |                                               | 0    | 20     | 0      | 0     | 0     | 0    | 0     | 20     |                                                      | I   |      |      |     |     |     |       | WD                | I  |
| A*11:01:27                                              | 11:01:27       | HLA05727 |                                               | 0    | 1      | 5      | 0     | 0     | 0    | 0     | 6      |                                                      |     | WD   |      |     |     |     |       | WD                | WD |
| A*11:01:30                                              | 11:01:30       | HLA06740 |                                               | 0    | 2      | 0      | 0     | 0     | 0    | 1     | 3      |                                                      |     |      |      |     |     |     |       |                   |    |
| A*11:01:34                                              | 11:01:34       | HLA07101 |                                               | 0    | 2      | 0      | 0     | 0     | 0    | 0     | 2      |                                                      |     |      |      |     |     |     |       |                   |    |
| A*11:01:35                                              | 11:01:35       | HLA07295 |                                               | 0    | 5      | 0      | 0     | 0     | 0    | 0     | 5      |                                                      | WD  |      |      |     |     |     |       | WD                | WD |
| A*11:01:36                                              | 11:01:36       | HLA07429 |                                               | 2    | 0      | 11     | 0     | 0     | 0    | 2     | 15     |                                                      |     | WD   |      |     |     |     |       | WD                | WD |

| Supplemental Table 8: HLA-A Allele Summary <sup>a</sup> |                        |          | Allele Count by Population Group <sup>b</sup> |           |             |            |           |           |           |            |             | 3.0.0 CIWD Category by Population Group <sup>c</sup> |          |           |           |          |           |          |          |                   |
|---------------------------------------------------------|------------------------|----------|-----------------------------------------------|-----------|-------------|------------|-----------|-----------|-----------|------------|-------------|------------------------------------------------------|----------|-----------|-----------|----------|-----------|----------|----------|-------------------|
| Allele                                                  | Genomic Typing         | AlleleID | G group                                       | AFA       | API         | EURO       | MENA      | HIS       | NAM       | UNK        | Total       | AFA                                                  | API      | EURO      | MENA      | HIS      | NAM       | UNK      | Total    | Highest Frequency |
| A*11:01:38                                              | 11:01:38               | HLA07575 |                                               | 0         | 0           | 6          | 1         | 0         | 0         | 0          | 7           |                                                      |          | WD        |           |          |           |          | WD       | WD                |
| A*11:01:39                                              | 11:01:39               | HLA07577 |                                               | 0         | 1           | 0          | 0         | 0         | 0         | 0          | 1           |                                                      |          |           |           |          |           |          |          |                   |
| A*11:01:40                                              | 11:01:40               | HLA07672 |                                               | 0         | 2           | 0          | 0         | 0         | 0         | 0          | 2           |                                                      |          |           |           |          |           |          |          |                   |
| A*11:01:41                                              | 11:01:41               | HLA07982 |                                               | 0         | 1           | 0          | 0         | 0         | 0         | 0          | 1           |                                                      |          |           |           |          |           |          |          |                   |
| A*11:01:42                                              | 11:01:42               | HLA08257 |                                               | 0         | 1           | 2          | 0         | 0         | 0         | 0          | 3           |                                                      |          |           |           |          |           |          |          |                   |
| A*11:01:43                                              | 11:01:43               | HLA08258 |                                               | 0         | 0           | 3          | 0         | 0         | 0         | 0          | 3           |                                                      |          |           |           |          |           |          |          |                   |
| A*11:01:44                                              | 11:01:44               | HLA08260 |                                               | 0         | 1           | 5          | 0         | 0         | 0         | 0          | 6           |                                                      |          | WD        |           |          |           |          | WD       | WD                |
| A*11:01:45                                              | 11:01:45               | HLA08266 |                                               | 0         | 3           | 0          | 0         | 0         | 0         | 0          | 3           |                                                      |          |           |           |          |           |          |          |                   |
| A*11:01:48                                              | 11:01:48               | HLA09523 |                                               | 0         | 0           | 0          | 1         | 0         | 0         | 0          | 1           |                                                      |          |           |           |          |           |          |          |                   |
| A*11:01:57                                              | 11:01:57               | HLA10885 |                                               | 0         | 1           | 0          | 0         | 0         | 0         | 0          | 1           |                                                      |          |           |           |          |           |          |          |                   |
| A*11:01:60                                              | 11:01:60               | HLA10964 |                                               | 0         | 1           | 0          | 0         | 0         | 0         | 0          | 1           |                                                      |          |           |           |          |           |          |          |                   |
| A*11:01:61                                              | 11:01:61               | HLA10965 |                                               | 0         | 1           | 0          | 0         | 0         | 0         | 0          | 1           |                                                      |          |           |           |          |           |          |          |                   |
| A*11:01:62                                              | 11:01:62               | HLA10969 |                                               | 0         | 0           | 1          | 0         | 0         | 0         | 0          | 1           |                                                      |          |           |           |          |           |          |          |                   |
| A*11:01:63                                              | 11:01:63               | HLA11633 |                                               | 0         | 1           | 0          | 0         | 0         | 0         | 0          | 1           |                                                      |          |           |           |          |           |          |          |                   |
| A*11:01:65                                              | 11:01:65               | HLA12104 |                                               | 0         | 2           | 1          | 0         | 0         | 0         | 0          | 3           |                                                      |          |           |           |          |           |          |          |                   |
| A*11:01:66                                              | 11:01:66               | HLA12626 |                                               | 0         | 1           | 0          | 0         | 0         | 0         | 0          | 1           |                                                      |          |           |           |          |           |          |          |                   |
| A*11:01:68                                              | 11:01:68               | HLA13437 |                                               | 0         | 1           | 0          | 0         | 0         | 0         | 0          | 1           |                                                      |          |           |           |          |           |          |          |                   |
| A*11:01:69                                              | 11:01:69               | HLA14388 |                                               | 0         | 0           | 1          | 0         | 0         | 0         | 0          | 1           |                                                      |          |           |           |          |           |          |          |                   |
| A*11:01:70                                              | 11:01:70               | HLA14639 |                                               | 0         | 2           | 0          | 0         | 0         | 0         | 0          | 2           |                                                      |          |           |           |          |           |          |          |                   |
| A*11:107                                                | 11:107                 | HLA07106 |                                               | 0         | 1           | 0          | 0         | 0         | 0         | 0          | 1           |                                                      |          |           |           |          |           |          |          |                   |
| <b>A*11:02 total</b>                                    | <b>11:02 total</b>     |          |                                               | <b>21</b> | <b>7959</b> | <b>203</b> | <b>33</b> | <b>31</b> | <b>5</b>  | <b>700</b> | <b>8952</b> | <b>WD</b>                                            | <b>C</b> | <b>I</b>  | <b>WD</b> | <b>I</b> | <b>WD</b> | <b>C</b> | <b>C</b> | <b>C</b>          |
| A*11:02                                                 | 11:02                  |          |                                               | 0         | 24          | 5          | 0         | 0         | 0         | 6          | 35          |                                                      | I        | WD        |           |          |           | WD       | WD       | I                 |
| <b>A*11:02:01G total</b>                                | <b>11:02:01G total</b> |          |                                               | <b>21</b> | <b>7931</b> | <b>198</b> | <b>33</b> | <b>31</b> | <b>5</b>  | <b>693</b> | <b>8912</b> | <b>WD</b>                                            | <b>C</b> | <b>I</b>  | <b>WD</b> | <b>I</b> | <b>WD</b> | <b>C</b> | <b>C</b> | <b>C</b>          |
| A*11:02:01G                                             | 11:02:01G              |          | 11:02:01G                                     | 18        | 6950        | 191        | 32        | 28        | 5         | 563        | 7787        | WD                                                   | C        | I         | WD        | I        | WD        | C        | C        | C                 |
| A*11:02:01                                              | 11:02:01               | HLA00044 | 11:02:01G                                     | 3         | 981         | 7          | 1         | 3         | 0         | 130        | 1125        |                                                      | C        | WD        |           |          |           | I        | I        | C                 |
| A*11:02:02                                              | 11:02:02               | HLA02442 |                                               | 0         | 4           | 0          | 0         | 0         | 0         | 0          | 4           |                                                      |          |           |           |          |           |          |          |                   |
| A*11:02:04                                              | 11:02:04               | HLA09301 |                                               | 0         | 0           | 0          | 0         | 0         | 0         | 1          | 1           |                                                      |          |           |           |          |           |          |          |                   |
| <b>A*11:03 total</b>                                    | <b>11:03 total</b>     |          |                                               | <b>19</b> | <b>1855</b> | <b>31</b>  | <b>26</b> | <b>7</b>  | <b>34</b> | <b>60</b>  | <b>2032</b> | <b>WD</b>                                            | <b>C</b> | <b>WD</b> | <b>WD</b> | <b>D</b> | <b>C</b>  | <b>I</b> | <b>C</b> | <b>C</b>          |
| <b>A*11:03:01G total</b>                                | <b>11:03:01G total</b> |          |                                               | <b>19</b> | <b>1855</b> | <b>31</b>  | <b>26</b> | <b>7</b>  | <b>34</b> | <b>60</b>  | <b>2032</b> | <b>WD</b>                                            | <b>C</b> | <b>WD</b> | <b>WD</b> | <b>D</b> | <b>C</b>  | <b>I</b> | <b>C</b> | <b>C</b>          |
| A*11:03                                                 | 11:03                  | HLA00045 | 11:03:01G                                     | 11        | 426         | 12         | 4         | 5         | 23        | 32         | 513         | WD                                                   | C        | WD        |           | WD       | C         | I        | I        | C                 |

| Supplemental Table 8: HLA-A Allele Summary <sup>a</sup> |                        |          | Allele Count by Population Group <sup>b</sup> |          |          |            |          |           |          |           |            | 3.0.0 CIWD Category by Population Group <sup>c</sup> |           |           |      |          |     |          |           |                   |
|---------------------------------------------------------|------------------------|----------|-----------------------------------------------|----------|----------|------------|----------|-----------|----------|-----------|------------|------------------------------------------------------|-----------|-----------|------|----------|-----|----------|-----------|-------------------|
| Allele                                                  | Genomic Typing         | AlleleID | G group                                       | AFA      | API      | EURO       | MENA     | HIS       | NAM      | UNK       | Total      | AFA                                                  | API       | EURO      | MENA | HIS      | NAM | UNK      | Total     | Highest Frequency |
| A*11:03:01G                                             | 11:03:01G              |          | 11:03:01G                                     | 8        | 1429     | 19         | 22       | 2         | 11       | 28        | 1519       | WD                                                   | C         | WD        | WD   |          | C   | I        | I         | C                 |
| A*11:04                                                 | 11:04                  | HLA00046 |                                               | 2        | 316      | 201        | 4        | 0         | 0        | 26        | 549        |                                                      | C         | I         |      |          |     | I        | I         | C                 |
| <b>A*11:05 total</b>                                    | <b>11:05 total</b>     |          |                                               | <b>7</b> | <b>2</b> | <b>252</b> | <b>1</b> | <b>27</b> | <b>2</b> | <b>44</b> | <b>335</b> | <b>WD</b>                                            |           | <b>I</b>  |      | <b>I</b> |     | <b>I</b> | <b>I</b>  | <b>I</b>          |
| <b>A*11:05:01G total</b>                                | <b>11:05:01G total</b> |          |                                               | <b>7</b> | <b>2</b> | <b>252</b> | <b>1</b> | <b>27</b> | <b>2</b> | <b>44</b> | <b>335</b> | <b>WD</b>                                            |           | <b>I</b>  |      | <b>I</b> |     | <b>I</b> | <b>I</b>  | <b>I</b>          |
| A*11:05                                                 | 11:05                  | HLA00047 | 11:05:01G                                     | 6        | 2        | 226        | 1        | 23        | 2        | 39        | 299        | WD                                                   |           | I         |      | I        |     | I        | I         | I                 |
| A*11:05:01G                                             | 11:05:01G              |          | 11:05:01G                                     | 0        | 0        | 17         | 0        | 0         | 0        | 4         | 21         |                                                      |           | WD        |      |          |     |          | WD        | WD                |
| A*11:05P                                                | 11:05P                 |          |                                               | 0        | 0        | 1          | 0        | 0         | 0        | 0         | 1          |                                                      |           |           |      |          |     |          |           |                   |
| A*11:248                                                | 11:248                 | HLA15608 | 11:05:01G                                     | 1        | 0        | 8          | 0        | 4         | 0        | 1         | 14         |                                                      |           | WD        |      |          |     |          | WD        | WD                |
| A*11:06                                                 | 11:06                  | HLA01104 |                                               | 0        | 0        | 4          | 0        | 0         | 0        | 1         | 5          |                                                      |           |           |      |          |     |          | WD        | WD                |
| A*11:07                                                 | 11:07                  | HLA01297 |                                               | 0        | 0        | 1          | 0        | 0         | 0        | 0         | 1          |                                                      |           |           |      |          |     |          |           |                   |
| A*11:08                                                 | 11:08                  | HLA01298 |                                               | 2        | 2        | 14         | 0        | 20        | 1        | 7         | 46         |                                                      |           | WD        |      | I        |     | WD       | WD        | I                 |
| A*11:09                                                 | 11:09                  | HLA01310 |                                               | 1        | 0        | 85         | 0        | 0         | 0        | 4         | 90         |                                                      |           | WD        |      |          |     |          | WD        | WD                |
| A*11:10                                                 | 11:10                  | HLA01423 |                                               | 0        | 1        | 12         | 1        | 0         | 0        | 0         | 14         |                                                      |           | WD        |      |          |     |          | WD        | WD                |
| A*11:11                                                 | 11:11                  | HLA01547 |                                               | 0        | 0        | 2          | 0        | 0         | 0        | 0         | 2          |                                                      |           |           |      |          |     |          |           |                   |
| A*11:12                                                 | 11:12                  | HLA01556 |                                               | 0        | 8        | 399        | 0        | 12        | 0        | 43        | 462        |                                                      | WD        | I         |      | I        |     | I        | I         | I                 |
| A*11:14                                                 | 11:14                  | HLA01647 |                                               | 0        | 1        | 0          | 0        | 0         | 0        | 0         | 1          |                                                      |           |           |      |          |     |          |           |                   |
| <b>A*11:15 total</b>                                    | <b>11:15 total</b>     |          |                                               | <b>0</b> | <b>6</b> | <b>21</b>  | <b>0</b> | <b>0</b>  | <b>0</b> | <b>0</b>  | <b>27</b>  |                                                      | <b>WD</b> | <b>WD</b> |      |          |     |          | <b>WD</b> | <b>WD</b>         |
| A*11:15:01                                              | 11:15:01               | HLA01815 |                                               | 0        | 6        | 0          | 0        | 0         | 0        | 0         | 6          |                                                      | WD        |           |      |          |     |          | WD        | WD                |
| A*11:15:02                                              | 11:15:02               | HLA03112 |                                               | 0        | 0        | 21         | 0        | 0         | 0        | 0         | 21         |                                                      |           | WD        |      |          |     |          | WD        | WD                |
| A*11:16                                                 | 11:16                  | HLA01829 |                                               | 0        | 3        | 0          | 0        | 0         | 0        | 0         | 3          |                                                      |           |           |      |          |     |          |           |                   |
| A*11:17                                                 | 11:17                  | HLA01839 |                                               | 0        | 2        | 0          | 0        | 0         | 0        | 0         | 2          |                                                      |           |           |      |          |     |          |           |                   |
| A*11:18                                                 | 11:18                  | HLA01973 |                                               | 0        | 1        | 16         | 19       | 0         | 0        | 0         | 36         |                                                      |           | WD        | WD   |          |     |          | WD        | WD                |
| A*11:19                                                 | 11:19                  | HLA01987 |                                               | 0        | 22       | 6          | 1        | 0         | 0        | 0         | 29         |                                                      | I         | WD        |      |          |     |          | WD        | I                 |
| A*11:20                                                 | 11:20                  | HLA02045 |                                               | 0        | 17       | 2          | 0        | 0         | 0        | 4         | 23         |                                                      | I         |           |      |          |     |          | WD        | I                 |
| A*11:23                                                 | 11:23                  | HLA02124 |                                               | 0        | 0        | 0          | 0        | 0         | 0        | 2         | 2          |                                                      |           |           |      |          |     |          |           |                   |
| <b>A*11:24 total</b>                                    | <b>11:24 total</b>     |          |                                               | <b>0</b> | <b>0</b> | <b>3</b>   | <b>0</b> | <b>0</b>  | <b>0</b> | <b>0</b>  | <b>3</b>   |                                                      |           |           |      |          |     |          |           |                   |
| A*11:24:01                                              | 11:24:01               | HLA02386 |                                               | 0        | 0        | 3          | 0        | 0         | 0        | 0         | 3          |                                                      |           |           |      |          |     |          |           |                   |
| <b>A*11:25 total</b>                                    | <b>11:25 total</b>     |          |                                               | <b>0</b> | <b>0</b> | <b>6</b>   | <b>0</b> | <b>0</b>  | <b>0</b> | <b>1</b>  | <b>7</b>   |                                                      |           | <b>WD</b> |      |          |     |          | <b>WD</b> | <b>WD</b>         |
| A*11:25                                                 | 11:25                  |          |                                               | 0        | 0        | 4          | 0        | 0         | 0        | 0         | 4          |                                                      |           |           |      |          |     |          |           |                   |
| A*11:25:01                                              | 11:25:01               | HLA02456 |                                               | 0        | 0        | 2          | 0        | 0         | 0        | 0         | 2          |                                                      |           |           |      |          |     |          |           |                   |

| Supplemental Table 8: HLA-A Allele Summary <sup>a</sup> |                    |          | Allele Count by Population Group <sup>b</sup> |          |          |          |          |          |          |          |          | 3.0.0 CIWD Category by Population Group <sup>c</sup> |     |      |      |     |     |     |           |                   |  |
|---------------------------------------------------------|--------------------|----------|-----------------------------------------------|----------|----------|----------|----------|----------|----------|----------|----------|------------------------------------------------------|-----|------|------|-----|-----|-----|-----------|-------------------|--|
| Allele                                                  | Genomic Typing     | AlleleID | G group                                       | AFA      | API      | EURO     | MENA     | HIS      | NAM      | UNK      | Total    | AFA                                                  | API | EURO | MENA | HIS | NAM | UNK | Total     | Highest Frequency |  |
| A*11:25:02                                              | 11:25:02           | HLA13835 |                                               | 0        | 0        | 0        | 0        | 0        | 0        | 1        | 1        |                                                      |     |      |      |     |     |     |           |                   |  |
| A*11:27                                                 | 11:27              | HLA02530 |                                               | 0        | 2        | 0        | 0        | 0        | 0        | 0        | 2        |                                                      |     |      |      |     |     |     |           |                   |  |
| A*11:29                                                 | 11:29              | HLA02601 |                                               | 0        | 0        | 132      | 1        | 0        | 0        | 5        | 138      |                                                      |     | I    |      |     |     | WD  | WD        | I                 |  |
| A*11:30                                                 | 11:30              | HLA02775 |                                               | 0        | 0        | 32       | 0        | 4        | 0        | 4        | 40       |                                                      |     | WD   |      |     |     |     | WD        | WD                |  |
| A*11:31                                                 | 11:31              | HLA02921 |                                               | 0        | 0        | 1        | 0        | 0        | 0        | 0        | 1        |                                                      |     |      |      |     |     |     |           |                   |  |
| <b>A*11:32 total</b>                                    | <b>11:32 total</b> |          |                                               | <b>0</b> | <b>3</b> | <b>3</b> | <b>0</b> | <b>0</b> | <b>0</b> | <b>1</b> | <b>7</b> |                                                      |     |      |      |     |     |     | <b>WD</b> | <b>WD</b>         |  |
| A*11:32                                                 | 11:32              |          |                                               | 0        | 1        | 1        | 0        | 0        | 0        | 1        | 3        |                                                      |     |      |      |     |     |     |           |                   |  |
| A*11:32P                                                | 11:32P             |          |                                               | 0        | 0        | 1        | 0        | 0        | 0        | 0        | 1        |                                                      |     |      |      |     |     |     |           |                   |  |
| A*11:32:01                                              | 11:32:01           | HLA02975 |                                               | 0        | 2        | 1        | 0        | 0        | 0        | 0        | 3        |                                                      |     |      |      |     |     |     |           |                   |  |
| A*11:34                                                 | 11:34              | HLA03351 |                                               | 0        | 0        | 4        | 0        | 0        | 0        | 0        | 4        |                                                      |     |      |      |     |     |     |           |                   |  |
| A*11:36                                                 | 11:36              | HLA03394 |                                               | 0        | 1        | 1        | 0        | 0        | 0        | 0        | 2        |                                                      |     |      |      |     |     |     |           |                   |  |
| A*11:37                                                 | 11:37              | HLA03422 |                                               | 0        | 1        | 21       | 0        | 0        | 0        | 0        | 22       |                                                      |     | WD   |      |     |     |     | WD        | WD                |  |
| A*11:39                                                 | 11:39              | HLA03532 |                                               | 0        | 2        | 12       | 0        | 0        | 0        | 1        | 15       |                                                      |     | WD   |      |     |     |     | WD        | WD                |  |
| A*11:40                                                 | 11:40              | HLA03576 |                                               | 0        | 0        | 1        | 0        | 0        | 0        | 0        | 1        |                                                      |     |      |      |     |     |     |           |                   |  |
| A*11:41                                                 | 11:41              | HLA03686 |                                               | 0        | 4        | 0        | 0        | 0        | 0        | 1        | 5        |                                                      |     |      |      |     |     |     | WD        | WD                |  |
| A*11:42                                                 | 11:42              | HLA03690 |                                               | 0        | 1        | 1        | 0        | 0        | 0        | 0        | 2        |                                                      |     |      |      |     |     |     |           |                   |  |
| A*11:43                                                 | 11:43              | HLA03750 |                                               | 0        | 1        | 0        | 0        | 0        | 0        | 0        | 1        |                                                      |     |      |      |     |     |     |           |                   |  |
| A*11:44                                                 | 11:44              | HLA03814 |                                               | 0        | 56       | 1        | 0        | 0        | 0        | 0        | 57       |                                                      | I   |      |      |     |     |     | WD        | I                 |  |
| A*11:45                                                 | 11:45              | HLA03878 |                                               | 0        | 0        | 0        | 5        | 0        | 0        | 0        | 5        |                                                      |     |      | WD   |     |     |     | WD        | WD                |  |
| A*11:46                                                 | 11:46              | HLA03890 |                                               | 0        | 0        | 2        | 0        | 0        | 0        | 0        | 2        |                                                      |     |      |      |     |     |     |           |                   |  |
| A*11:47                                                 | 11:47              | HLA03918 |                                               | 0        | 1        | 47       | 0        | 0        | 0        | 1        | 49       |                                                      |     | WD   |      |     |     |     | WD        | WD                |  |
| A*11:50Q                                                | 11:50Q             | HLA04135 |                                               | 0        | 0        | 4        | 0        | 0        | 0        | 0        | 4        |                                                      |     |      |      |     |     |     |           |                   |  |
| A*11:51                                                 | 11:51              | HLA04147 |                                               | 0        | 0        | 0        | 0        | 0        | 0        | 1        | 1        |                                                      |     |      |      |     |     |     |           |                   |  |
| A*11:54                                                 | 11:54              | HLA04465 |                                               | 0        | 0        | 0        | 4        | 0        | 0        | 0        | 4        |                                                      |     |      |      |     |     |     |           |                   |  |
| A*11:58                                                 | 11:58              | HLA04772 |                                               | 0        | 125      | 0        | 0        | 0        | 0        | 2        | 127      |                                                      | I   |      |      |     |     |     | WD        | I                 |  |
| A*11:60                                                 | 11:60              | HLA05116 |                                               | 0        | 0        | 1        | 0        | 0        | 0        | 0        | 1        |                                                      |     |      |      |     |     |     |           |                   |  |
| A*11:63                                                 | 11:63              | HLA05313 |                                               | 0        | 0        | 3        | 0        | 0        | 0        | 0        | 3        |                                                      |     |      |      |     |     |     |           |                   |  |
| A*11:64                                                 | 11:64              | HLA05322 |                                               | 0        | 8        | 0        | 0        | 0        | 0        | 0        | 8        |                                                      | WD  |      |      |     |     |     | WD        | WD                |  |
| A*11:66                                                 | 11:66              | HLA05450 |                                               | 0        | 3        | 0        | 0        | 0        | 0        | 1        | 4        |                                                      |     |      |      |     |     |     |           |                   |  |
| A*11:67                                                 | 11:67              | HLA05455 |                                               | 0        | 0        | 7        | 0        | 2        | 0        | 2        | 11       |                                                      |     | WD   |      |     |     |     | WD        | WD                |  |



| Supplemental Table 8: HLA-A Allele Summary <sup>a</sup> |                     |          | Allele Count by Population Group <sup>b</sup> |     |     |      |      |     |     |     |       | 3.0.0 CIWD Category by Population Group <sup>c</sup> |     |      |      |     |     |     |       |                   |
|---------------------------------------------------------|---------------------|----------|-----------------------------------------------|-----|-----|------|------|-----|-----|-----|-------|------------------------------------------------------|-----|------|------|-----|-----|-----|-------|-------------------|
| Allele                                                  | Genomic Typing      | AlleleID | G group                                       | AFA | API | EURO | MENA | HIS | NAM | UNK | Total | AFA                                                  | API | EURO | MENA | HIS | NAM | UNK | Total | Highest Frequency |
| <b>A*11:70 total</b>                                    | <b>11:70 total</b>  |          |                                               | 0   | 0   | 5    | 0    | 0   | 0   | 0   | 5     |                                                      |     | WD   |      |     |     |     | WD    | WD                |
| A*11:70                                                 | 11:70               |          |                                               | 0   | 0   | 1    | 0    | 0   | 0   | 0   | 1     |                                                      |     |      |      |     |     |     |       |                   |
| A*11:70:01                                              | 11:70:01            | HLA05545 |                                               | 0   | 0   | 1    | 0    | 0   | 0   | 0   | 1     |                                                      |     |      |      |     |     |     |       |                   |
| A*11:70:02                                              | 11:70:02            | HLA11207 |                                               | 0   | 0   | 3    | 0    | 0   | 0   | 0   | 3     |                                                      |     |      |      |     |     |     |       |                   |
| A*11:71                                                 | 11:71               | HLA05659 |                                               | 0   | 4   | 0    | 0    | 0   | 0   | 0   | 4     |                                                      |     |      |      |     |     |     |       |                   |
| A*11:72                                                 | 11:72               | HLA05678 |                                               | 0   | 0   | 1    | 2    | 0   | 0   | 0   | 3     |                                                      |     |      |      |     |     |     |       |                   |
| A*11:73                                                 | 11:73               | HLA05699 |                                               | 0   | 1   | 1    | 0    | 0   | 0   | 1   | 3     |                                                      |     |      |      |     |     |     |       |                   |
| A*11:74                                                 | 11:74               | HLA05728 |                                               | 0   | 0   | 9    | 0    | 0   | 0   | 0   | 9     |                                                      |     | WD   |      |     |     |     | WD    | WD                |
| A*11:81                                                 | 11:81               | HLA05931 |                                               | 0   | 0   | 21   | 0    | 0   | 0   | 0   | 21    |                                                      |     | WD   |      |     |     |     | WD    | WD                |
| A*11:82                                                 | 11:82               | HLA05939 |                                               | 0   | 0   | 0    | 0    | 0   | 0   | 1   | 1     |                                                      |     |      |      |     |     |     |       |                   |
| A*11:83                                                 | 11:83               | HLA05940 |                                               | 0   | 0   | 3    | 0    | 0   | 0   | 1   | 4     |                                                      |     |      |      |     |     |     |       |                   |
| A*11:84                                                 | 11:84               | HLA05985 |                                               | 0   | 0   | 2    | 0    | 0   | 0   | 0   | 2     |                                                      |     |      |      |     |     |     |       |                   |
| A*11:85                                                 | 11:85               | HLA06003 |                                               | 0   | 1   | 0    | 0    | 0   | 0   | 0   | 1     |                                                      |     |      |      |     |     |     |       |                   |
| A*11:88                                                 | 11:88               | HLA06110 |                                               | 0   | 2   | 0    | 0    | 0   | 0   | 0   | 2     |                                                      |     |      |      |     |     |     |       |                   |
| A*11:89                                                 | 11:89               | HLA06085 |                                               | 0   | 27  | 0    | 0    | 0   | 0   | 0   | 27    |                                                      | I   |      |      |     |     |     | WD    | I                 |
| <b>A*11:91 total</b>                                    | <b>11:91 total</b>  |          |                                               | 0   | 0   | 10   | 0    | 0   | 0   | 0   | 10    |                                                      |     | WD   |      |     |     |     | WD    | WD                |
| A*11:91:01                                              | 11:91:01            | HLA06101 |                                               | 0   | 0   | 10   | 0    | 0   | 0   | 0   | 10    |                                                      |     | WD   |      |     |     |     | WD    | WD                |
| A*11:92                                                 | 11:92               | HLA06104 |                                               | 0   | 0   | 5    | 0    | 0   | 0   | 1   | 6     |                                                      |     | WD   |      |     |     |     | WD    | WD                |
| A*11:95                                                 | 11:95               | HLA06339 |                                               | 0   | 1   | 0    | 0    | 0   | 0   | 0   | 1     |                                                      |     |      |      |     |     |     |       |                   |
| A*11:98                                                 | 11:98               | HLA06367 |                                               | 0   | 0   | 2    | 0    | 1   | 0   | 0   | 3     |                                                      |     |      |      |     |     |     |       |                   |
| A*11:103                                                | 11:103              | HLA06555 |                                               | 0   | 0   | 3    | 0    | 0   | 0   | 0   | 3     |                                                      |     |      |      |     |     |     |       |                   |
| A*11:105                                                | 11:105              | HLA06809 |                                               | 0   | 0   | 1    | 0    | 0   | 0   | 0   | 1     |                                                      |     |      |      |     |     |     |       |                   |
| A*11:106                                                | 11:106              | HLA06797 |                                               | 0   | 0   | 2    | 0    | 0   | 0   | 0   | 2     |                                                      |     |      |      |     |     |     |       |                   |
| A*11:109N                                               | 11:109N             | HLA07294 |                                               | 0   | 0   | 7    | 0    | 0   | 0   | 0   | 7     |                                                      |     | WD   |      |     |     |     | WD    | WD                |
| A*11:111                                                | 11:111              | HLA07394 |                                               | 0   | 0   | 0    | 1    | 0   | 0   | 0   | 1     |                                                      |     |      |      |     |     |     |       |                   |
| A*11:112                                                | 11:112              | HLA07410 |                                               | 0   | 2   | 0    | 0    | 0   | 0   | 0   | 2     |                                                      |     |      |      |     |     |     |       |                   |
| A*11:115N                                               | 11:115N             | HLA07574 |                                               | 0   | 1   | 0    | 0    | 0   | 0   | 0   | 1     |                                                      |     |      |      |     |     |     |       |                   |
| A*11:117                                                | 11:117              | HLA07578 |                                               | 0   | 0   | 5    | 0    | 0   | 0   | 0   | 5     |                                                      |     | WD   |      |     |     |     | WD    | WD                |
| A*11:118                                                | 11:118              | HLA07579 |                                               | 0   | 1   | 0    | 0    | 0   | 0   | 0   | 1     |                                                      |     |      |      |     |     |     |       |                   |
| <b>A*11:119 total</b>                                   | <b>11:119 total</b> |          |                                               | 0   | 1   | 1    | 0    | 0   | 0   | 1   | 3     |                                                      |     |      |      |     |     |     |       |                   |

| Supplemental Table 8: HLA-A Allele Summary <sup>a</sup> |                      |          | Allele Count by Population Group <sup>b</sup> |          |          |          |          |          |          |          |          | 3.0.0 CIWD Category by Population Group <sup>c</sup> |     |      |      |     |     |     |       |                   |    |  |
|---------------------------------------------------------|----------------------|----------|-----------------------------------------------|----------|----------|----------|----------|----------|----------|----------|----------|------------------------------------------------------|-----|------|------|-----|-----|-----|-------|-------------------|----|--|
| Allele                                                  | Genomic Typing       | AlleleID | G group                                       | AFA      | API      | EURO     | MENA     | HIS      | NAM      | UNK      | Total    | AFA                                                  | API | EURO | MENA | HIS | NAM | UNK | Total | Highest Frequency |    |  |
| A*11:119:01                                             | 11:119:01            | HLA07668 |                                               | 0        | 1        | 1        | 0        | 0        | 0        | 1        | 3        |                                                      |     |      |      |     |     |     |       |                   |    |  |
| A*11:122                                                | 11:122               | HLA07818 |                                               | 0        | 0        | 1        | 0        | 0        | 0        | 0        | 1        |                                                      |     |      |      |     |     |     |       |                   |    |  |
| A*11:131                                                | 11:131               | HLA08614 |                                               | 0        | 0        | 3        | 0        | 0        | 0        | 0        | 3        |                                                      |     |      |      |     |     |     |       |                   |    |  |
| A*11:132                                                | 11:132               | HLA08618 |                                               | 0        | 0        | 1        | 0        | 0        | 0        | 0        | 1        |                                                      |     |      |      |     |     |     |       |                   |    |  |
| A*11:134                                                | 11:134               | HLA08930 |                                               | 0        | 1        | 0        | 0        | 0        | 0        | 0        | 1        |                                                      |     |      |      |     |     |     |       |                   |    |  |
| A*11:135                                                | 11:135               | HLA08941 |                                               | 0        | 0        | 3        | 0        | 0        | 0        | 0        | 3        |                                                      |     |      |      |     |     |     |       |                   |    |  |
| A*11:136                                                | 11:136               | HLA08942 |                                               | 0        | 1        | 0        | 0        | 0        | 0        | 0        | 1        |                                                      |     |      |      |     |     |     |       |                   |    |  |
| <b>A*11:137N total</b>                                  | <b>11:137N total</b> |          |                                               | <b>0</b> | <b>0</b> | <b>4</b> | <b>0</b> | <b>0</b> | <b>0</b> | <b>0</b> | <b>4</b> |                                                      |     |      |      |     |     |     |       |                   |    |  |
| A*11:137N                                               | 11:137N              |          |                                               | 0        | 0        | 4        | 0        | 0        | 0        | 0        | 4        |                                                      |     |      |      |     |     |     |       |                   |    |  |
| A*11:138                                                | 11:138               | HLA08944 |                                               | 0        | 0        | 0        | 0        | 1        | 0        | 0        | 1        |                                                      |     |      |      |     |     |     |       |                   |    |  |
| A*11:147                                                | 11:147               | HLA09780 |                                               | 0        | 1        | 0        | 0        | 0        | 0        | 0        | 1        |                                                      |     |      |      |     |     |     |       |                   |    |  |
| A*11:148                                                | 11:148               | HLA09781 |                                               | 0        | 2        | 0        | 0        | 0        | 0        | 0        | 2        |                                                      |     |      |      |     |     |     |       |                   |    |  |
| A*11:149                                                | 11:149               | HLA09782 |                                               | 0        | 0        | 1        | 0        | 0        | 0        | 0        | 1        |                                                      |     |      |      |     |     |     |       |                   |    |  |
| A*11:150                                                | 11:150               | HLA09788 |                                               | 0        | 0        | 3        | 0        | 0        | 0        | 0        | 3        |                                                      |     |      |      |     |     |     |       |                   |    |  |
| <b>A*11:153 total</b>                                   | <b>11:153 total</b>  |          |                                               | <b>0</b> | <b>0</b> | <b>3</b> | <b>0</b> | <b>0</b> | <b>0</b> | <b>1</b> | <b>4</b> |                                                      |     |      |      |     |     |     |       |                   |    |  |
| A*11:153:01                                             | 11:153:01            | HLA10201 |                                               | 0        | 0        | 1        | 0        | 0        | 0        | 0        | 1        |                                                      |     |      |      |     |     |     |       |                   |    |  |
| A*11:153:02                                             | 11:153:02            | HLA10791 |                                               | 0        | 0        | 2        | 0        | 0        | 0        | 1        | 3        |                                                      |     |      |      |     |     |     |       |                   |    |  |
| A*11:159                                                | 11:159               | HLA10376 |                                               | 0        | 8        | 0        | 0        | 0        | 0        | 0        | 8        |                                                      | WD  |      |      |     |     |     |       | WD                | WD |  |
| A*11:160                                                | 11:160               | HLA10377 |                                               | 0        | 1        | 2        | 2        | 0        | 0        | 0        | 5        |                                                      |     |      |      |     |     |     |       | WD                | WD |  |
| A*11:161                                                | 11:161               | HLA10378 |                                               | 0        | 5        | 0        | 0        | 0        | 0        | 0        | 5        |                                                      | WD  |      |      |     |     |     |       | WD                | WD |  |
| A*11:162                                                | 11:162               | HLA10646 |                                               | 0        | 0        | 0        | 1        | 0        | 0        | 0        | 1        |                                                      |     |      |      |     |     |     |       |                   |    |  |
| A*11:182Q                                               | 11:182Q              | HLA10942 |                                               | 0        | 1        | 0        | 0        | 0        | 0        | 0        | 1        |                                                      |     |      |      |     |     |     |       |                   |    |  |
| A*11:183                                                | 11:183               | HLA10955 |                                               | 0        | 24       | 0        | 0        | 0        | 0        | 2        | 26       |                                                      | I   |      |      |     |     |     |       | WD                | I  |  |
| A*11:184                                                | 11:184               | HLA10966 |                                               | 0        | 0        | 4        | 0        | 0        | 0        | 0        | 4        |                                                      |     |      |      |     |     |     |       |                   |    |  |
| A*11:185                                                | 11:185               | HLA10967 |                                               | 0        | 1        | 0        | 0        | 0        | 0        | 0        | 1        |                                                      |     |      |      |     |     |     |       |                   |    |  |
| A*11:187                                                | 11:187               | HLA10970 |                                               | 0        | 9        | 0        | 0        | 0        | 0        | 0        | 9        |                                                      | WD  |      |      |     |     |     |       | WD                | WD |  |
| A*11:189                                                | 11:189               | HLA11206 |                                               | 0        | 0        | 1        | 0        | 0        | 0        | 0        | 1        |                                                      |     |      |      |     |     |     |       |                   |    |  |
| A*11:190                                                | 11:190               | HLA11298 |                                               | 0        | 2        | 0        | 0        | 0        | 0        | 1        | 3        |                                                      |     |      |      |     |     |     |       |                   |    |  |
| A*11:192                                                | 11:192               | HLA11475 |                                               | 0        | 0        | 1        | 0        | 0        | 0        | 0        | 1        |                                                      |     |      |      |     |     |     |       |                   |    |  |
| A*11:195                                                | 11:195               | HLA11783 |                                               | 0        | 1        | 0        | 0        | 0        | 0        | 0        | 1        |                                                      |     |      |      |     |     |     |       |                   |    |  |

| Supplemental Table 8: HLA-A Allele Summary <sup>a</sup> |                        |          | Allele Count by Population Group <sup>b</sup> |              |             |               |              |              |             |              |               | 3.0.0 CIWD Category by Population Group <sup>c</sup> |          |          |          |          |          |          |          |                   |          |
|---------------------------------------------------------|------------------------|----------|-----------------------------------------------|--------------|-------------|---------------|--------------|--------------|-------------|--------------|---------------|------------------------------------------------------|----------|----------|----------|----------|----------|----------|----------|-------------------|----------|
| Allele                                                  | Genomic Typing         | AlleleID | G group                                       | AFA          | API         | EURO          | MENA         | HIS          | NAM         | UNK          | Total         | AFA                                                  | API      | EURO     | MENA     | HIS      | NAM      | UNK      | Total    | Highest Frequency |          |
| A*11:196                                                | 11:196                 | HLA11784 |                                               | 0            | 2           | 0             | 0            | 0            | 0           | 0            | 2             |                                                      |          |          |          |          |          |          |          |                   |          |
| <b>A*11:199 total</b>                                   | <b>11:199 total</b>    |          |                                               | <b>0</b>     | <b>1</b>    | <b>3</b>      | <b>0</b>     | <b>0</b>     | <b>0</b>    | <b>0</b>     | <b>4</b>      |                                                      |          |          |          |          |          |          |          |                   |          |
| A*11:199                                                | 11:199                 |          |                                               | 0            | 1           | 3             | 0            | 0            | 0           | 0            | 4             |                                                      |          |          |          |          |          |          |          |                   |          |
| A*11:201                                                | 11:201                 | HLA11984 |                                               | 0            | 1           | 0             | 0            | 0            | 0           | 0            | 1             |                                                      |          |          |          |          |          |          |          |                   |          |
| A*11:202                                                | 11:202                 | HLA11986 |                                               | 0            | 1           | 0             | 0            | 0            | 0           | 0            | 1             |                                                      |          |          |          |          |          |          |          |                   |          |
| A*11:205                                                | 11:205                 | HLA12103 |                                               | 0            | 3           | 0             | 0            | 0            | 0           | 0            | 3             |                                                      |          |          |          |          |          |          |          |                   |          |
| A*11:207                                                | 11:207                 | HLA12243 |                                               | 0            | 0           | 1             | 0            | 1            | 0           | 0            | 2             |                                                      |          |          |          |          |          |          |          |                   |          |
| A*11:208N                                               | 11:208N                | HLA12423 |                                               | 0            | 1           | 0             | 0            | 0            | 0           | 0            | 1             |                                                      |          |          |          |          |          |          |          |                   |          |
| A*11:211                                                | 11:211                 | HLA12627 |                                               | 0            | 10          | 0             | 0            | 0            | 0           | 0            | 10            |                                                      | WD       |          |          |          |          |          | WD       | WD                |          |
| A*11:214                                                | 11:214                 | HLA12938 |                                               | 0            | 1           | 0             | 0            | 0            | 0           | 0            | 1             |                                                      |          |          |          |          |          |          |          |                   |          |
| A*11:219                                                | 11:219                 | HLA13642 |                                               | 0            | 0           | 1             | 0            | 2            | 0           | 0            | 3             |                                                      |          |          |          |          |          |          |          |                   |          |
| A*11:221                                                | 11:221                 | HLA13702 |                                               | 0            | 0           | 5             | 0            | 0            | 0           | 0            | 5             |                                                      |          | WD       |          |          |          |          | WD       | WD                |          |
| A*11:223                                                | 11:223                 | HLA13723 |                                               | 0            | 3           | 0             | 0            | 0            | 0           | 0            | 3             |                                                      |          |          |          |          |          |          |          |                   |          |
| A*11:224                                                | 11:224                 | HLA13945 |                                               | 0            | 3           | 0             | 0            | 0            | 0           | 0            | 3             |                                                      |          |          |          |          |          |          |          |                   |          |
| A*11:226                                                | 11:226                 | HLA13948 |                                               | 0            | 2           | 1             | 0            | 0            | 0           | 0            | 3             |                                                      |          |          |          |          |          |          |          |                   |          |
| A*11:233                                                | 11:233                 | HLA14430 |                                               | 0            | 3           | 0             | 0            | 0            | 0           | 0            | 3             |                                                      |          |          |          |          |          |          |          |                   |          |
| A*11:236                                                | 11:236                 | HLA14708 |                                               | 0            | 1           | 0             | 0            | 0            | 0           | 0            | 1             |                                                      |          |          |          |          |          |          |          |                   |          |
| A*11:260                                                | 11:260                 | HLA16632 |                                               | 0            | 0           | 1             | 0            | 0            | 0           | 0            | 1             |                                                      |          |          |          |          |          |          |          |                   |          |
| A*11:CODE                                               | 11:CODE                |          |                                               | 545          | 5653        | 47279         | 984          | 3700         | 289         | 6675         | 65125         | NA                                                   | NA       | NA       | NA       | NA       | NA       | NA       | NA       | NA                | NA       |
| <b>A*23:01 total</b>                                    | <b>23:01 total</b>     |          |                                               | <b>36259</b> | <b>6029</b> | <b>227588</b> | <b>13116</b> | <b>19021</b> | <b>2209</b> | <b>33141</b> | <b>337363</b> | <b>C</b>                                             | <b>C</b> | <b>C</b> | <b>C</b> | <b>C</b> | <b>C</b> | <b>C</b> | <b>C</b> | <b>C</b>          | <b>C</b> |
| A*23:01                                                 | 23:01                  |          |                                               | 3            | 1           | 1377          | 10           | 9            | 0           | 105          | 1505          |                                                      |          | C        | WD       | I        |          | I        | I        | I                 | C        |
| A*23:01P                                                | 23:01P                 |          |                                               | 2            | 2           | 429           | 2            | 3            | 0           | 2            | 440           |                                                      |          | I        |          |          |          | I        | I        | I                 | I        |
| <b>A*23:01:01G total</b>                                | <b>23:01:01G total</b> |          |                                               | <b>36245</b> | <b>6025</b> | <b>225704</b> | <b>13102</b> | <b>19007</b> | <b>2209</b> | <b>33026</b> | <b>335318</b> | <b>C</b>                                             | <b>C</b> | <b>C</b> | <b>C</b> | <b>C</b> | <b>C</b> | <b>C</b> | <b>C</b> | <b>C</b>          | <b>C</b> |
| A*23:01:01G                                             | 23:01:01G              |          | 23:01:01G                                     | 29796        | 5685        | 216097        | 12813        | 14564        | 1654        | 30261        | 310870        | C                                                    | C        | C        | C        | C        | C        | C        | C        | C                 | C        |
| A*23:01:01                                              | 23:01:01               |          | 23:01:01G                                     | 4960         | 327         | 8801          | 245          | 3788         | 465         | 2267         | 20853         | C                                                    | C        | C        | C        | C        | C        | C        | C        | C                 | C        |
| A*23:01:01:01                                           | 23:01:01:01            | HLA00048 | 23:01:01G                                     | 293          | 8           | 712           | 30           | 224          | 15          | 191          | 1473          | C                                                    | WD       | I        | WD       | C        | C        | C        | I        | I                 | C        |
| A*23:01:01:02                                           | 23:01:01:02            | HLA16429 | 23:01:01G                                     | 1            | 0           | 5             | 0            | 8            | 0           | 4            | 18            |                                                      |          | WD       |          | I        |          |          | WD       | WD                | I        |
| A*23:01:01:03                                           | 23:01:01:03            | HLA16403 | 23:01:01G                                     | 0            | 0           | 0             | 0            | 0            | 0           | 1            | 1             |                                                      |          |          |          |          |          |          |          |                   |          |
| A*23:07N                                                | 23:07N                 | HLA01470 | 23:01:01G                                     | 0            | 0           | 1             | 0            | 1            | 0           | 0            | 2             |                                                      |          |          |          |          |          |          |          |                   |          |
| A*23:17                                                 | 23:17                  | HLA03165 | 23:01:01G                                     | 1195         | 5           | 67            | 14           | 416          | 75          | 300          | 2072          | C                                                    | WD       | WD       | WD       | C        | C        | C        | C        | C                 | C        |

| Supplemental Table 8: HLA-A Allele Summary <sup>a</sup> |                    |          | Allele Count by Population Group <sup>b</sup> |           |          |          |          |          |          |          |           | 3.0.0 CIWD Category by Population Group <sup>c</sup> |     |           |      |     |     |     |           |                   |
|---------------------------------------------------------|--------------------|----------|-----------------------------------------------|-----------|----------|----------|----------|----------|----------|----------|-----------|------------------------------------------------------|-----|-----------|------|-----|-----|-----|-----------|-------------------|
| Allele                                                  | Genomic Typing     | AlleleID | G group                                       | AFA       | API      | EURO     | MENA     | HIS      | NAM      | UNK      | Total     | AFA                                                  | API | EURO      | MENA | HIS | NAM | UNK | Total     | Highest Frequency |
| A*23:18                                                 | 23:18              | HLA03170 | 23:01:01G                                     | 0         | 0        | 21       | 0        | 6        | 0        | 2        | 29        |                                                      |     | WD        |      | WD  |     |     | WD        | WD                |
| A*23:01:02                                              | 23:01:02           | HLA03788 |                                               | 0         | 0        | 62       | 1        | 0        | 0        | 1        | 64        |                                                      |     | WD        |      |     |     |     | WD        | WD                |
| A*23:01:03                                              | 23:01:03           | HLA05426 |                                               | 5         | 0        | 0        | 0        | 0        | 0        | 0        | 5         | WD                                                   |     |           |      |     |     |     | WD        | WD                |
| A*23:01:04                                              | 23:01:04           | HLA05553 |                                               | 3         | 0        | 0        | 0        | 0        | 0        | 2        | 5         |                                                      |     |           |      |     |     |     | WD        | WD                |
| A*23:01:06                                              | 23:01:06           | HLA06762 |                                               | 0         | 0        | 6        | 0        | 0        | 0        | 2        | 8         |                                                      |     | WD        |      |     |     |     | WD        | WD                |
| A*23:01:09                                              | 23:01:09           | HLA07594 |                                               | 0         | 0        | 0        | 0        | 3        | 0        | 0        | 3         |                                                      |     |           |      |     |     |     |           |                   |
| A*23:01:10                                              | 23:01:10           | HLA08271 |                                               | 0         | 0        | 9        | 0        | 0        | 0        | 2        | 11        |                                                      |     | WD        |      |     |     |     | WD        | WD                |
| A*23:01:11                                              | 23:01:11           | HLA08628 |                                               | 0         | 0        | 0        | 0        | 0        | 0        | 1        | 1         |                                                      |     |           |      |     |     |     |           |                   |
| A*23:01:12                                              | 23:01:12           | HLA10382 |                                               | 0         | 0        | 1        | 0        | 0        | 0        | 0        | 1         |                                                      |     |           |      |     |     |     |           |                   |
| A*23:01:15                                              | 23:01:15           | HLA12551 |                                               | 0         | 0        | 1        | 0        | 0        | 0        | 0        | 1         |                                                      |     |           |      |     |     |     |           |                   |
| A*23:01:16                                              | 23:01:16           | HLA12635 |                                               | 0         | 1        | 0        | 0        | 0        | 0        | 0        | 1         |                                                      |     |           |      |     |     |     |           |                   |
| A*23:01:18                                              | 23:01:18           | HLA12948 |                                               | 1         | 0        | 0        | 1        | 0        | 0        | 0        | 2         |                                                      |     |           |      |     |     |     |           |                   |
| A*23:02                                                 | 23:02              | HLA01038 |                                               | 19        | 0        | 0        | 0        | 0        | 0        | 1        | 20        | WD                                                   |     |           |      |     |     |     | WD        | WD                |
| <b>A*23:03 total</b>                                    | <b>23:03 total</b> |          |                                               | <b>13</b> | <b>0</b> | <b>9</b> | <b>2</b> | <b>0</b> | <b>0</b> | <b>1</b> | <b>25</b> | <b>WD</b>                                            |     | <b>WD</b> |      |     |     |     | <b>WD</b> | <b>WD</b>         |
| A*23:03                                                 | 23:03              |          |                                               | 2         | 0        | 0        | 0        | 0        | 0        | 1        | 3         |                                                      |     |           |      |     |     |     |           |                   |
| A*23:03:01                                              | 23:03:01           | HLA01039 |                                               | 4         | 0        | 1        | 0        | 0        | 0        | 0        | 5         |                                                      |     |           |      |     |     |     | WD        | WD                |
| A*23:03:02                                              | 23:03:02           | HLA03177 |                                               | 7         | 0        | 8        | 2        | 0        | 0        | 0        | 17        | WD                                                   |     | WD        |      |     |     |     | WD        | WD                |
| A*23:04                                                 | 23:04              | HLA01108 |                                               | 8         | 0        | 3        | 0        | 2        | 0        | 2        | 15        | WD                                                   |     |           |      |     |     |     | WD        | WD                |
| A*23:05                                                 | 23:05              | HLA01111 |                                               | 26        | 2        | 18       | 0        | 104      | 24       | 28       | 202       | WD                                                   |     | WD        |      | C   | C   | I   | I         | C                 |
| A*23:06                                                 | 23:06              | HLA01210 |                                               | 23        | 0        | 8        | 1        | 3        | 0        | 13       | 48        | WD                                                   |     | WD        |      |     |     | WD  | WD        | WD                |
| A*23:08N                                                | 23:08N             | HLA01492 |                                               | 0         | 0        | 1        | 0        | 0        | 0        | 0        | 1         |                                                      |     |           |      |     |     |     |           |                   |
| A*23:11N                                                | 23:11N             | HLA01834 |                                               | 17        | 0        | 1        | 0        | 0        | 0        | 2        | 20        | WD                                                   |     |           |      |     |     |     | WD        | WD                |
| A*23:12                                                 | 23:12              | HLA01847 |                                               | 1         | 0        | 5        | 1        | 0        | 0        | 2        | 9         |                                                      |     | WD        |      |     |     |     | WD        | WD                |
| A*23:13                                                 | 23:13              | HLA02328 |                                               | 3         | 0        | 80       | 3        | 2        | 0        | 1        | 89        |                                                      |     | WD        |      |     |     |     | WD        | WD                |
| <b>A*23:14 total</b>                                    | <b>23:14 total</b> |          |                                               | <b>0</b>  | <b>4</b> | <b>4</b> | <b>0</b> | <b>0</b> | <b>0</b> | <b>0</b> | <b>8</b>  |                                                      |     |           |      |     |     |     | <b>WD</b> | <b>WD</b>         |
| A*23:14:02                                              | 23:14:02           | HLA08277 |                                               | 0         | 4        | 4        | 0        | 0        | 0        | 0        | 8         |                                                      |     |           |      |     |     |     | WD        | WD                |
| A*23:15                                                 | 23:15              | HLA02892 |                                               | 76        | 0        | 5        | 0        | 2        | 2        | 14       | 99        | C                                                    |     | WD        |      |     |     | I   | WD        | C                 |
| A*23:19N                                                | 23:19N             | HLA03183 |                                               | 56        | 0        | 1        | 0        | 1        | 0        | 13       | 71        | C                                                    |     |           |      |     |     | WD  | WD        | C                 |
| A*23:21                                                 | 23:21              | HLA03691 |                                               | 0         | 0        | 0        | 0        | 1        | 0        | 0        | 1         |                                                      |     |           |      |     |     |     |           |                   |
| A*23:23                                                 | 23:23              | HLA04485 |                                               | 0         | 0        | 7        | 0        | 0        | 0        | 0        | 7         |                                                      |     | WD        |      |     |     |     | WD        | WD                |

| Supplemental Table 8: HLA-A Allele Summary <sup>a</sup> |                    |          | Allele Count by Population Group <sup>b</sup> |          |          |          |          |          |          |          |          | 3.0.0 CIWD Category by Population Group <sup>c</sup> |     |      |      |     |     |     |       |                   |  |
|---------------------------------------------------------|--------------------|----------|-----------------------------------------------|----------|----------|----------|----------|----------|----------|----------|----------|------------------------------------------------------|-----|------|------|-----|-----|-----|-------|-------------------|--|
| Allele                                                  | Genomic Typing     | AlleleID | G group                                       | AFA      | API      | EURO     | MENA     | HIS      | NAM      | UNK      | Total    | AFA                                                  | API | EURO | MENA | HIS | NAM | UNK | Total | Highest Frequency |  |
| A*23:24                                                 | 23:24              | HLA04487 |                                               | 0        | 0        | 2        | 0        | 0        | 0        | 0        | 2        |                                                      |     |      |      |     |     |     |       |                   |  |
| A*23:26                                                 | 23:26              | HLA05236 |                                               | 0        | 1        | 0        | 0        | 0        | 0        | 0        | 1        |                                                      |     |      |      |     |     |     |       |                   |  |
| A*23:27                                                 | 23:27              | HLA05433 |                                               | 0        | 0        | 1        | 0        | 0        | 0        | 0        | 1        |                                                      |     |      |      |     |     |     |       |                   |  |
| A*23:28                                                 | 23:28              | HLA05435 |                                               | 0        | 0        | 4        | 0        | 0        | 0        | 0        | 4        |                                                      |     |      |      |     |     |     |       |                   |  |
| A*23:29                                                 | 23:29              | HLA05449 |                                               | 0        | 0        | 0        | 0        | 0        | 0        | 1        | 1        |                                                      |     |      |      |     |     |     |       |                   |  |
| A*23:30                                                 | 23:30              | HLA05524 |                                               | 0        | 0        | 2        | 8        | 0        | 0        | 1        | 11       |                                                      |     |      | WD   |     |     |     | WD    | WD                |  |
| A*23:31                                                 | 23:31              | HLA05555 |                                               | 1        | 0        | 0        | 0        | 0        | 0        | 1        | 2        |                                                      |     |      |      |     |     |     |       |                   |  |
| A*23:34                                                 | 23:34              | HLA06086 |                                               | 3        | 0        | 0        | 0        | 0        | 0        | 1        | 4        |                                                      |     |      |      |     |     |     |       |                   |  |
| A*23:35                                                 | 23:35              | HLA06093 |                                               | 0        | 0        | 1        | 0        | 0        | 0        | 0        | 1        |                                                      |     |      |      |     |     |     |       |                   |  |
| A*23:36                                                 | 23:36              | HLA06094 |                                               | 0        | 0        | 2        | 0        | 0        | 0        | 0        | 2        |                                                      |     |      |      |     |     |     |       |                   |  |
| <b>A*23:37 total</b>                                    | <b>23:37 total</b> |          |                                               | <b>1</b> | <b>0</b> | <b>0</b> | <b>0</b> | <b>0</b> | <b>0</b> | <b>0</b> | <b>1</b> |                                                      |     |      |      |     |     |     |       |                   |  |
| A*23:37:02                                              | 23:37:02           | HLA08272 |                                               | 1        | 0        | 0        | 0        | 0        | 0        | 0        | 1        |                                                      |     |      |      |     |     |     |       |                   |  |
| A*23:39                                                 | 23:39              | HLA06547 |                                               | 0        | 0        | 1        | 13       | 0        | 0        | 0        | 14       |                                                      |     |      | WD   |     |     |     | WD    | WD                |  |
| A*23:42                                                 | 23:42              | HLA06785 |                                               | 0        | 0        | 1        | 0        | 0        | 0        | 0        | 1        |                                                      |     |      |      |     |     |     |       |                   |  |
| A*23:43                                                 | 23:43              | HLA06798 |                                               | 0        | 0        | 1        | 0        | 0        | 0        | 0        | 1        |                                                      |     |      |      |     |     |     |       |                   |  |
| A*23:47                                                 | 23:47              | HLA07175 |                                               | 0        | 0        | 19       | 0        | 0        | 0        | 0        | 19       |                                                      |     | WD   |      |     |     |     | WD    | WD                |  |
| A*23:48                                                 | 23:48              | HLA07398 |                                               | 0        | 0        | 14       | 0        | 0        | 0        | 0        | 14       |                                                      |     | WD   |      |     |     |     | WD    | WD                |  |
| A*23:49                                                 | 23:49              | HLA07403 |                                               | 0        | 0        | 2        | 0        | 0        | 0        | 0        | 2        |                                                      |     |      |      |     |     |     |       |                   |  |
| A*23:52                                                 | 23:52              | HLA07986 |                                               | 1        | 0        | 0        | 0        | 0        | 0        | 1        | 2        |                                                      |     |      |      |     |     |     |       |                   |  |
| A*23:53                                                 | 23:53              | HLA07987 |                                               | 1        | 0        | 5        | 0        | 0        | 0        | 0        | 6        |                                                      |     | WD   |      |     |     |     | WD    | WD                |  |
| A*23:54                                                 | 23:54              | HLA08274 |                                               | 0        | 0        | 1        | 0        | 0        | 0        | 0        | 1        |                                                      |     |      |      |     |     |     |       |                   |  |
| A*23:56                                                 | 23:56              | HLA08953 |                                               | 4        | 0        | 1        | 0        | 0        | 0        | 0        | 5        |                                                      |     |      |      |     |     |     | WD    | WD                |  |
| A*23:57                                                 | 23:57              | HLA09119 |                                               | 0        | 0        | 1        | 0        | 0        | 0        | 0        | 1        |                                                      |     |      |      |     |     |     |       |                   |  |
| A*23:60                                                 | 23:60              | HLA09794 |                                               | 0        | 0        | 1        | 1        | 0        | 0        | 0        | 2        |                                                      |     |      |      |     |     |     |       |                   |  |
| A*23:63                                                 | 23:63              | HLA11398 |                                               | 0        | 0        | 0        | 1        | 0        | 0        | 0        | 1        |                                                      |     |      |      |     |     |     |       |                   |  |
| A*23:64                                                 | 23:64              | HLA11639 |                                               | 0        | 0        | 0        | 0        | 0        | 0        | 1        | 1        |                                                      |     |      |      |     |     |     |       |                   |  |
| A*23:67                                                 | 23:67              | HLA12246 |                                               | 0        | 0        | 2        | 0        | 0        | 0        | 0        | 2        |                                                      |     |      |      |     |     |     |       |                   |  |
| A*23:68                                                 | 23:68              | HLA12550 |                                               | 0        | 0        | 1        | 0        | 0        | 0        | 0        | 1        |                                                      |     |      |      |     |     |     |       |                   |  |
| A*23:72                                                 | 23:72              | HLA14826 |                                               | 0        | 0        | 1        | 0        | 0        | 0        | 0        | 1        |                                                      |     |      |      |     |     |     |       |                   |  |
| A*23:73                                                 | 23:73              | HLA14912 |                                               | 0        | 0        | 1        | 0        | 0        | 0        | 0        | 1        |                                                      |     |      |      |     |     |     |       |                   |  |

| Supplemental Table 8: HLA-A Allele Summary <sup>a</sup> |                        |          | Allele Count by Population Group <sup>b</sup> |             |               |               |              |              |             |               |                | 3.0.0 CIWD Category by Population Group <sup>c</sup> |          |           |           |          |          |          |          |                   |
|---------------------------------------------------------|------------------------|----------|-----------------------------------------------|-------------|---------------|---------------|--------------|--------------|-------------|---------------|----------------|------------------------------------------------------|----------|-----------|-----------|----------|----------|----------|----------|-------------------|
| Allele                                                  | Genomic Typing         | AlleleID | G group                                       | AFA         | API           | EURO          | MENA         | HIS          | NAM         | UNK           | Total          | AFA                                                  | API      | EURO      | MENA      | HIS      | NAM      | UNK      | Total    | Highest Frequency |
| A*23:76                                                 | 23:76                  | HLA15820 |                                               | 0           | 0             | 1             | 0            | 0            | 0           | 0             | 1              |                                                      |          |           |           |          |          |          |          |                   |
| A*23:CODE                                               | 23:CODE                |          |                                               | 3912        | 244           | 23700         | 498          | 2704         | 259         | 4818          | 36135          | NA                                                   | NA       | NA        | NA        | NA       | NA       | NA       | NA       | NA                |
| <b>A*24:02 total</b>                                    | <b>24:02 total</b>     |          |                                               | <b>9376</b> | <b>186507</b> | <b>998959</b> | <b>48550</b> | <b>75846</b> | <b>6894</b> | <b>114400</b> | <b>1440532</b> | <b>C</b>                                             | <b>C</b> | <b>C</b>  | <b>C</b>  | <b>C</b> | <b>C</b> | <b>C</b> | <b>C</b> | <b>C</b>          |
| A*24:02                                                 | 24:02                  |          |                                               | 9           | 131           | 5944          | 41           | 208          | 20          | 388           | 6741           | WD                                                   | C        | C         | C         | C        | C        | C        | C        | C                 |
| A*24:02P                                                | 24:02P                 |          |                                               | 2           | 11            | 2218          | 2            | 12           | 1           | 15            | 2261           |                                                      | WD       | C         |           | I        |          | I        | C        | C                 |
| <b>A*24:02:01G total</b>                                | <b>24:02:01G total</b> |          |                                               | <b>9339</b> | <b>185630</b> | <b>989688</b> | <b>48222</b> | <b>75450</b> | <b>6830</b> | <b>113577</b> | <b>1428736</b> | <b>C</b>                                             | <b>C</b> | <b>C</b>  | <b>C</b>  | <b>C</b> | <b>C</b> | <b>C</b> | <b>C</b> | <b>C</b>          |
| A*24:02:01G                                             | 24:02:01G              |          | 24:02:01G                                     | 7612        | 170511        | 948376        | 47205        | 56970        | 5174        | 105052        | 1340900        | C                                                    | C        | C         | C         | C        | C        | C        | C        | C                 |
| A*24:02:01                                              | 24:02:01               |          | 24:02:01G                                     | 367         | 3554          | 10821         | 253          | 4278         | 396         | 2075          | 21744          | C                                                    | C        | C         | C         | C        | C        | C        | C        | C                 |
| A*24:02:01:01                                           | 24:02:01:01            | HLA00050 | 24:02:01G                                     | 1207        | 10712         | 28196         | 643          | 13270        | 1178        | 6090          | 61296          | C                                                    | C        | C         | C         | C        | C        | C        | C        | C                 |
| <b>A*24:02L total</b>                                   | <b>24:02L total</b>    |          |                                               | <b>0</b>    | <b>138</b>    | <b>92</b>     | <b>26</b>    | <b>23</b>    | <b>4</b>    | <b>27</b>     | <b>310</b>     |                                                      | <b>C</b> | <b>WD</b> | <b>WD</b> | <b>I</b> |          | <b>I</b> | <b>I</b> | <b>C</b>          |
| A*24:02L                                                | 24:02L                 |          | 24:02:01G                                     | 0           | 0             | 2             | 0            | 0            | 0           | 3             | 5              |                                                      |          |           |           |          |          |          | WD       | WD                |
| A*24:02:01L                                             | 24:02:01L              |          | 24:02:01G                                     | 0           | 2             | 0             | 0            | 0            | 0           | 0             | 2              |                                                      |          |           |           |          |          |          |          |                   |
| A*24:02:01:02L                                          | 24:02:01:02L           | HLA00051 | 24:02:01G                                     | 0           | 136           | 90            | 26           | 23           | 4           | 24            | 303            |                                                      | C        | WD        | WD        | I        |          | I        | I        | C                 |
| A*24:02:01:04                                           | 24:02:01:04            | HLA13780 | 24:02:01G                                     | 27          | 398           | 935           | 82           | 188          | 27          | 128           | 1785           | WD                                                   | C        | I         | C         | C        | C        | I        | C        | C                 |
| A*24:02:01:05                                           | 24:02:01:05            | HLA13786 | 24:02:01G                                     | 14          | 52            | 1074          | 10           | 120          | 4           | 99            | 1373           | WD                                                   | I        | I         | WD        | C        |          | I        | I        | C                 |
| A*24:02:01:06                                           | 24:02:01:06            | HLA14800 | 24:02:01G                                     | 11          | 3             | 8             | 1            | 479          | 39          | 39            | 580            | WD                                                   |          | WD        |           | C        | C        | I        | I        | C                 |
| A*24:02:01:07                                           | 24:02:01:07            | HLA14802 | 24:02:01G                                     | 71          | 0             | 0             | 0            | 0            | 0           | 18            | 89             | C                                                    |          |           |           |          |          | I        | WD       | C                 |
| A*24:02:01:08                                           | 24:02:01:08            | HLA14803 | 24:02:01G                                     | 0           | 1             | 79            | 1            | 1            | 1           | 6             | 89             |                                                      |          | WD        |           |          |          | WD       | WD       | WD                |
| A*24:02:01:09                                           | 24:02:01:09            | HLA16411 | 24:02:01G                                     | 0           | 0             | 0             | 0            | 0            | 0           | 2             | 2              |                                                      |          |           |           |          |          |          |          |                   |
| A*24:02:01:10                                           | 24:02:01:10            | HLA16439 | 24:02:01G                                     | 0           | 0             | 1             | 0            | 0            | 0           | 0             | 1              |                                                      |          |           |           |          |          |          |          |                   |
| A*24:02:01:12                                           | 24:02:01:12            | HLA16837 | 24:02:01G                                     | 0           | 0             | 33            | 0            | 30           | 2           | 4             | 69             |                                                      |          | WD        |           | I        |          |          | WD       | I                 |
| A*24:02:01:13                                           | 24:02:01:13            | HLA16862 | 24:02:01G                                     | 0           | 0             | 1             | 0            | 0            | 0           | 0             | 1              |                                                      |          |           |           |          |          |          |          |                   |
| A*24:02:03Q                                             | 24:02:03Q              | HLA01616 | 24:02:01G                                     | 0           | 0             | 1             | 0            | 0            | 0           | 0             | 1              |                                                      |          |           |           |          |          |          |          |                   |
| A*24:02:10                                              | 24:02:10               | HLA02353 | 24:02:01G                                     | 0           | 2             | 0             | 0            | 2            | 0           | 0             | 4              |                                                      |          |           |           |          |          |          |          |                   |
| A*24:02:13                                              | 24:02:13               | HLA02706 | 24:02:01G                                     | 1           | 115           | 22            | 1            | 17           | 0           | 8             | 164            |                                                      | I        | WD        |           | I        |          | WD       | I        | I                 |
| A*24:02:31                                              | 24:02:31               | HLA04683 | 24:02:01G                                     | 0           | 11            | 0             | 0            | 0            | 0           | 1             | 12             |                                                      | WD       |           |           |          |          |          | WD       | WD                |
| A*24:02:40                                              | 24:02:40               | HLA05795 | 24:02:01G                                     | 23          | 78            | 0             | 0            | 1            | 0           | 13            | 115            | WD                                                   | I        |           |           |          |          | WD       | WD       | I                 |
| A*24:02:65                                              | 24:02:65               | HLA09675 | 24:02:01G                                     | 0           | 0             | 2             | 0            | 0            | 0           | 0             | 2              |                                                      |          |           |           |          |          |          |          |                   |
| A*24:02:79                                              | 24:02:79               | HLA10828 | 24:02:01G                                     | 0           | 0             | 1             | 0            | 0            | 0           | 0             | 1              |                                                      |          |           |           |          |          |          |          |                   |
| A*24:02:98                                              | 24:02:98               | HLA15593 | 24:02:01G                                     | 2           | 1             | 0             | 0            | 65           | 4           | 4             | 76             |                                                      |          |           |           | I        |          |          | WD       | I                 |

| Supplemental Table 8: HLA-A Allele Summary <sup>a</sup> |                        |          | Allele Count by Population Group <sup>b</sup> |          |          |          |          |          |          |          |          | 3.0.0 CIWD Category by Population Group <sup>c</sup> |     |      |      |     |     |     |       |                   |  |
|---------------------------------------------------------|------------------------|----------|-----------------------------------------------|----------|----------|----------|----------|----------|----------|----------|----------|------------------------------------------------------|-----|------|------|-----|-----|-----|-------|-------------------|--|
| Allele                                                  | Genomic Typing         | AlleleID | G group                                       | AFA      | API      | EURO     | MENA     | HIS      | NAM      | UNK      | Total    | AFA                                                  | API | EURO | MENA | HIS | NAM | UNK | Total | Highest Frequency |  |
| A*24:09N                                                | 24:09N                 | HLA00059 | 24:02:01G                                     | 0        | 0        | 32       | 0        | 0        | 0        | 3        | 35       |                                                      |     | WD   |      |     |     |     | WD    | WD                |  |
| A*24:11N                                                | 24:11N                 | HLA00061 | 24:02:01G                                     | 4        | 38       | 14       | 0        | 2        | 1        | 4        | 63       |                                                      | I   | WD   |      |     |     |     | WD    | I                 |  |
| A*24:79                                                 | 24:79                  | HLA02984 | 24:02:01G                                     | 0        | 0        | 0        | 0        | 3        | 0        | 2        | 5        |                                                      |     |      |      |     |     |     | WD    | WD                |  |
| A*24:249                                                | 24:249                 | HLA10206 | 24:02:01G                                     | 0        | 1        | 0        | 0        | 0        | 0        | 0        | 1        |                                                      |     |      |      |     |     |     |       |                   |  |
| A*24:271                                                | 24:271                 | HLA10868 | 24:02:01G                                     | 0        | 3        | 0        | 0        | 0        | 0        | 1        | 4        |                                                      |     |      |      |     |     |     |       |                   |  |
| A*24:352                                                | 24:352                 | HLA15569 | 24:02:01G                                     | 0        | 0        | 0        | 0        | 1        | 0        | 0        | 1        |                                                      |     |      |      |     |     |     |       |                   |  |
| A*24:353                                                | 24:353                 | HLA15573 | 24:02:01G                                     | 0        | 12       | 0        | 0        | 0        | 0        | 1        | 13       |                                                      | WD  |      |      |     |     |     | WD    | WD                |  |
| A*24:02:02                                              | 24:02:02               | HLA00052 |                                               | 4        | 2        | 470      | 0        | 18       | 1        | 56       | 551      |                                                      |     | I    |      | I   |     | I   | I     | I                 |  |
| A*24:02:04                                              | 24:02:04               | HLA01648 |                                               | 18       | 24       | 259      | 158      | 151      | 40       | 321      | 971      | WD                                                   | I   | I    | C    | C   | C   | C   | I     | C                 |  |
| A*24:02:05                                              | 24:02:05               | HLA01828 |                                               | 2        | 671      | 90       | 84       | 6        | 1        | 24       | 878      |                                                      | C   | WD   | C    | WD  |     | I   | I     | C                 |  |
| A*24:02:06                                              | 24:02:06               | HLA01997 |                                               | 0        | 0        | 1        | 0        | 0        | 0        | 0        | 1        |                                                      |     |      |      |     |     |     |       |                   |  |
| A*24:02:07                                              | 24:02:07               | HLA02204 |                                               | 0        | 0        | 9        | 0        | 0        | 0        | 0        | 9        |                                                      |     | WD   |      |     |     |     | WD    | WD                |  |
| A*24:02:12                                              | 24:02:12               | HLA02652 |                                               | 0        | 0        | 2        | 0        | 0        | 0        | 0        | 2        |                                                      |     |      |      |     |     |     |       |                   |  |
| A*24:02:14                                              | 24:02:14               | HLA02869 |                                               | 0        | 1        | 98       | 0        | 0        | 0        | 0        | 99       |                                                      |     | WD   |      |     |     |     | WD    | WD                |  |
| A*24:02:15                                              | 24:02:15               | HLA03196 |                                               | 0        | 25       | 1        | 2        | 0        | 0        | 0        | 28       |                                                      | I   |      |      |     |     |     | WD    | I                 |  |
| A*24:02:18                                              | 24:02:18               | HLA03740 |                                               | 0        | 2        | 8        | 0        | 0        | 0        | 0        | 10       |                                                      |     | WD   |      |     |     |     | WD    | WD                |  |
| A*24:02:19                                              | 24:02:19               | HLA03741 |                                               | 3        | 1        | 99       | 0        | 1        | 0        | 6        | 110      |                                                      |     | WD   |      |     |     | WD  | WD    | WD                |  |
| A*24:02:22                                              | 24:02:22               | HLA04068 |                                               | 0        | 0        | 4        | 14       | 0        | 0        | 2        | 20       |                                                      |     |      | WD   |     |     |     | WD    | WD                |  |
| A*24:02:23                                              | 24:02:23               | HLA04153 |                                               | 0        | 0        | 10       | 3        | 0        | 0        | 2        | 15       |                                                      |     | WD   |      |     |     |     | WD    | WD                |  |
| A*24:02:24                                              | 24:02:24               | HLA04154 |                                               | 0        | 0        | 13       | 0        | 0        | 0        | 1        | 14       |                                                      |     | WD   |      |     |     |     | WD    | WD                |  |
| A*24:02:25                                              | 24:02:25               | HLA04155 |                                               | 0        | 0        | 16       | 0        | 0        | 0        | 0        | 16       |                                                      |     | WD   |      |     |     |     | WD    | WD                |  |
| A*24:02:26                                              | 24:02:26               | HLA04156 |                                               | 0        | 0        | 13       | 0        | 0        | 0        | 0        | 13       |                                                      |     | WD   |      |     |     |     | WD    | WD                |  |
| A*24:02:27                                              | 24:02:27               | HLA04429 |                                               | 0        | 0        | 7        | 0        | 0        | 0        | 9        | 16       |                                                      |     | WD   |      |     |     | WD  | WD    | WD                |  |
| A*24:02:28                                              | 24:02:28               | HLA04483 |                                               | 0        | 0        | 1        | 0        | 0        | 0        | 0        | 1        |                                                      |     |      |      |     |     |     |       |                   |  |
| A*24:02:29                                              | 24:02:29               | HLA04488 |                                               | 0        | 0        | 18       | 2        | 0        | 0        | 1        | 21       |                                                      |     | WD   |      |     |     |     | WD    | WD                |  |
| <b>A*24:02:34G total</b>                                | <b>24:02:34G total</b> |          |                                               | <b>0</b> | <b>0</b> | <b>1</b> | <b>1</b> | <b>0</b> | <b>0</b> | <b>0</b> | <b>2</b> |                                                      |     |      |      |     |     |     |       |                   |  |
| A*24:02:34G                                             | 24:02:34G              |          | 24:02:34G                                     | 0        | 0        | 1        | 1        | 0        | 0        | 0        | 2        |                                                      |     |      |      |     |     |     |       |                   |  |
| A*24:02:35                                              | 24:02:35               | HLA05353 |                                               | 1        | 28       | 1        | 17       | 0        | 0        | 2        | 49       |                                                      | I   |      | WD   |     |     |     | WD    | I                 |  |
| A*24:02:36                                              | 24:02:36               | HLA05364 |                                               | 0        | 0        | 1        | 0        | 0        | 0        | 0        | 1        |                                                      |     |      |      |     |     |     |       |                   |  |
| A*24:02:37                                              | 24:02:37               | HLA05461 |                                               | 0        | 0        | 1        | 0        | 0        | 0        | 0        | 1        |                                                      |     |      |      |     |     |     |       |                   |  |

| Supplemental Table 8: HLA-A Allele Summary <sup>a</sup> |                        |          | Allele Count by Population Group <sup>b</sup> |            |             |              |             |             |            |             |              | 3.0.0 CIWD Category by Population Group <sup>c</sup> |          |          |          |          |          |          |          |                   |          |
|---------------------------------------------------------|------------------------|----------|-----------------------------------------------|------------|-------------|--------------|-------------|-------------|------------|-------------|--------------|------------------------------------------------------|----------|----------|----------|----------|----------|----------|----------|-------------------|----------|
| Allele                                                  | Genomic Typing         | AlleleID | G group                                       | AFA        | API         | EURO         | MENA        | HIS         | NAM        | UNK         | Total        | AFA                                                  | API      | EURO     | MENA     | HIS      | NAM      | UNK      | Total    | Highest Frequency |          |
| A*24:02:39                                              | 24:02:39               | HLA05743 |                                               | 0          | 1           | 0            | 0           | 0           | 0          | 0           | 1            |                                                      |          |          |          |          |          |          |          |                   |          |
| A*24:02:47                                              | 24:02:47               | HLA06544 |                                               | 0          | 3           | 0            | 0           | 0           | 0          | 0           | 3            |                                                      |          |          |          |          |          |          |          |                   |          |
| A*24:02:48                                              | 24:02:48               | HLA06750 |                                               | 0          | 0           | 1            | 1           | 0           | 0          | 0           | 2            |                                                      |          |          |          |          |          |          |          |                   |          |
| A*24:02:49                                              | 24:02:49               | HLA06810 |                                               | 0          | 3           | 0            | 0           | 0           | 0          | 0           | 3            |                                                      |          |          |          |          |          |          |          |                   |          |
| A*24:02:53                                              | 24:02:53               | HLA07424 |                                               | 0          | 0           | 9            | 0           | 0           | 0          | 0           | 9            |                                                      |          | WD       |          |          |          |          | WD       | WD                |          |
| A*24:02:55                                              | 24:02:55               | HLA07563 |                                               | 0          | 1           | 0            | 0           | 0           | 0          | 0           | 1            |                                                      |          |          |          |          |          |          |          |                   |          |
| A*24:02:59                                              | 24:02:59               | HLA08273 |                                               | 0          | 0           | 0            | 0           | 2           | 0          | 1           | 3            |                                                      |          |          |          |          |          |          |          |                   |          |
| A*24:02:61                                              | 24:02:61               | HLA08300 |                                               | 0          | 1           | 0            | 0           | 0           | 0          | 0           | 1            |                                                      |          |          |          |          |          |          |          |                   |          |
| A*24:02:62                                              | 24:02:62               | HLA08633 |                                               | 0          | 5           | 12           | 0           | 0           | 0          | 0           | 17           |                                                      | WD       | WD       |          |          |          |          | WD       | WD                |          |
| A*24:02:63                                              | 24:02:63               | HLA08634 |                                               | 0          | 1           | 0            | 0           | 0           | 0          | 0           | 1            |                                                      |          |          |          |          |          |          |          |                   |          |
| A*24:02:66                                              | 24:02:66               | HLA09795 |                                               | 0          | 0           | 1            | 0           | 0           | 0          | 0           | 1            |                                                      |          |          |          |          |          |          |          |                   |          |
| A*24:02:68                                              | 24:02:68               | HLA09798 |                                               | 0          | 2           | 0            | 0           | 0           | 0          | 0           | 2            |                                                      |          |          |          |          |          |          |          |                   |          |
| A*24:02:71                                              | 24:02:71               | HLA09905 |                                               | 0          | 0           | 1            | 0           | 0           | 1          | 0           | 2            |                                                      |          |          |          |          |          |          |          |                   |          |
| A*24:02:72                                              | 24:02:72               | HLA10383 |                                               | 0          | 0           | 2            | 3           | 0           | 0          | 1           | 6            |                                                      |          |          |          |          |          |          | WD       | WD                |          |
| A*24:02:73                                              | 24:02:73               | HLA10384 |                                               | 2          | 0           | 0            | 0           | 0           | 0          | 0           | 2            |                                                      |          |          |          |          |          |          |          |                   |          |
| A*24:02:76                                              | 24:02:76               | HLA10815 |                                               | 0          | 0           | 2            | 0           | 0           | 0          | 0           | 2            |                                                      |          |          |          |          |          |          |          |                   |          |
| A*24:02:85                                              | 24:02:85               | HLA11213 |                                               | 0          | 1           | 0            | 0           | 0           | 0          | 0           | 1            |                                                      |          |          |          |          |          |          |          |                   |          |
| A*24:02:88                                              | 24:02:88               | HLA11637 |                                               | 0          | 0           | 3            | 0           | 0           | 0          | 1           | 4            |                                                      |          |          |          |          |          |          |          |                   |          |
| A*24:02:89                                              | 24:02:89               | HLA12166 |                                               | 0          | 0           | 1            | 0           | 0           | 0          | 0           | 1            |                                                      |          |          |          |          |          |          |          |                   |          |
| A*24:02:90                                              | 24:02:90               | HLA12409 |                                               | 0          | 1           | 0            | 0           | 0           | 0          | 0           | 1            |                                                      |          |          |          |          |          |          |          |                   |          |
| A*24:02:92                                              | 24:02:92               | HLA12954 |                                               | 0          | 0           | 0            | 0           | 0           | 1          | 0           | 1            |                                                      |          |          |          |          |          |          |          |                   |          |
| <b>A*24:03 total</b>                                    | <b>24:03 total</b>     |          |                                               | <b>230</b> | <b>5098</b> | <b>21749</b> | <b>3493</b> | <b>2278</b> | <b>229</b> | <b>4830</b> | <b>37907</b> | <b>C</b>                                             | <b>C</b> | <b>C</b> | <b>C</b> | <b>C</b> | <b>C</b> | <b>C</b> | <b>C</b> | <b>C</b>          | <b>C</b> |
| A*24:03                                                 | 24:03                  |          |                                               | 1          | 0           | 195          | 1           | 19          | 1          | 12          | 229          |                                                      |          | I        |          | I        |          | WD       | I        | I                 |          |
| A*24:03P                                                | 24:03P                 |          |                                               | 0          | 1           | 70           | 0           | 0           | 0          | 0           | 71           |                                                      |          | WD       |          |          |          |          | WD       | WD                |          |
| <b>A*24:03:01G total</b>                                | <b>24:03:01G total</b> |          |                                               | <b>223</b> | <b>5096</b> | <b>21471</b> | <b>3492</b> | <b>2146</b> | <b>225</b> | <b>4791</b> | <b>37444</b> | <b>C</b>                                             | <b>C</b> | <b>C</b> | <b>C</b> | <b>C</b> | <b>C</b> | <b>C</b> | <b>C</b> | <b>C</b>          | <b>C</b> |
| A*24:03:01G                                             | 24:03:01G              |          | 24:03:01G                                     | 174        | 4323        | 20264        | 3367        | 1635        | 158        | 4433        | 34354        | C                                                    | C        | C        | C        | C        | C        | C        | C        | C                 | C        |
| A*24:03:01                                              | 24:03:01               |          | 24:03:01G                                     | 27         | 278         | 717          | 86          | 306         | 31         | 164         | 1609         | WD                                                   | C        | I        | C        | C        | C        | C        | I        | C                 |          |
| A*24:03:01:01                                           | 24:03:01:01            | HLA00053 | 24:03:01G                                     | 19         | 97          | 478          | 39          | 133         | 16         | 88          | 870          | WD                                                   | I        | I        | WD       | C        | C        | I        | I        | C                 |          |
| A*24:03:01:02                                           | 24:03:01:02            | HLA14804 | 24:03:01G                                     | 2          | 2           | 5            | 0           | 67          | 15         | 13          | 104          |                                                      |          | WD       |          | I        | C        | WD       | WD       | C                 |          |
| A*24:33                                                 | 24:33                  | HLA01491 | 24:03:01G                                     | 1          | 396         | 7            | 0           | 5           | 5          | 93          | 507          |                                                      | C        | WD       |          | WD       | WD       | I        | I        | C                 |          |



| Supplemental Table 8: HLA-A Allele Summary <sup>a</sup> |                        |          | Allele Count by Population Group <sup>b</sup> |            |              |             |            |            |           |             |              | 3.0.0 CIWD Category by Population Group <sup>c</sup> |           |           |           |          |          |           |           |                   |
|---------------------------------------------------------|------------------------|----------|-----------------------------------------------|------------|--------------|-------------|------------|------------|-----------|-------------|--------------|------------------------------------------------------|-----------|-----------|-----------|----------|----------|-----------|-----------|-------------------|
| Allele                                                  | Genomic Typing         | AlleleID | G group                                       | AFA        | API          | EURO        | MENA       | HIS        | NAM       | UNK         | Total        | AFA                                                  | API       | EURO      | MENA      | HIS      | NAM      | UNK       | Total     | Highest Frequency |
| A*24:03:02                                              | 24:03:02               | HLA01040 |                                               | 6          | 1            | 13          | 0          | 113        | 3         | 27          | 163          | WD                                                   |           | WD        |           | C        |          | I         | I         | C                 |
| A*24:04                                                 | 24:04                  | HLA00054 |                                               | 0          | 26           | 5           | 1          | 0          | 0         | 1           | 33           |                                                      | I         | WD        |           |          |          |           | WD        | I                 |
| <b>A*24:05 total</b>                                    | <b>24:05 total</b>     |          |                                               | <b>10</b>  | <b>39</b>    | <b>107</b>  | <b>4</b>   | <b>257</b> | <b>36</b> | <b>77</b>   | <b>530</b>   | <b>WD</b>                                            | <b>I</b>  | <b>WD</b> |           | <b>C</b> | <b>C</b> | <b>I</b>  | <b>I</b>  | <b>C</b>          |
| A*24:05                                                 | 24:05                  |          |                                               | 5          | 11           | 24          | 1          | 69         | 12        | 13          | 135          | WD                                                   | WD        | WD        |           | I        | C        | WD        | WD        | C                 |
| A*24:05P                                                | 24:05P                 |          |                                               | 0          | 0            | 1           | 0          | 0          | 0         | 0           | 1            |                                                      |           |           |           |          |          |           |           |                   |
| <b>A*24:05:01G total</b>                                | <b>24:05:01G total</b> |          |                                               | <b>5</b>   | <b>28</b>    | <b>82</b>   | <b>3</b>   | <b>188</b> | <b>24</b> | <b>64</b>   | <b>394</b>   | <b>WD</b>                                            | <b>I</b>  | <b>WD</b> |           | <b>C</b> | <b>C</b> | <b>I</b>  | <b>I</b>  | <b>C</b>          |
| A*24:05:01G                                             | 24:05:01G              |          | 24:05:01G                                     | 5          | 28           | 79          | 3          | 176        | 23        | 62          | 376          | WD                                                   | I         | WD        |           | C        | C        | I         | I         | C                 |
| A*24:05:01                                              | 24:05:01               | HLA00055 | 24:05:01G                                     | 0          | 0            | 3           | 0          | 12         | 1         | 2           | 18           |                                                      |           |           |           | I        |          |           | WD        | I                 |
| A*24:06                                                 | 24:06                  | HLA00056 |                                               | 0          | 9            | 9           | 1          | 0          | 0         | 1           | 20           |                                                      | WD        | WD        |           |          |          |           | WD        | WD                |
| <b>A*24:07 total</b>                                    | <b>24:07 total</b>     |          |                                               | <b>184</b> | <b>23415</b> | <b>1641</b> | <b>324</b> | <b>227</b> | <b>37</b> | <b>3376</b> | <b>29204</b> | <b>C</b>                                             | <b>C</b>  | <b>C</b>  | <b>C</b>  | <b>C</b> | <b>C</b> | <b>C</b>  | <b>C</b>  | <b>C</b>          |
| A*24:07                                                 | 24:07                  |          |                                               | 76         | 5970         | 541         | 71         | 80         | 24        | 1202        | 7964         | C                                                    | C         | I         | C         | C        | C        | C         | C         | C                 |
| A*24:07:01                                              | 24:07:01               | HLA00057 |                                               | 108        | 17439        | 1100        | 253        | 147        | 13        | 2174        | 21234        | C                                                    | C         | I         | C         | C        | C        | C         | C         | C                 |
| A*24:07:02                                              | 24:07:02               | HLA12110 |                                               | 0          | 6            | 0           | 0          | 0          | 0         | 0           | 6            |                                                      | WD        |           |           |          |          |           | WD        | WD                |
| A*24:08                                                 | 24:08                  | HLA00058 |                                               | 0          | 89           | 2           | 0          | 0          | 0         | 11          | 102          |                                                      | I         |           |           |          |          | WD        | WD        | I                 |
| <b>A*24:10 total</b>                                    | <b>24:10 total</b>     |          |                                               | <b>4</b>   | <b>1735</b>  | <b>88</b>   | <b>10</b>  | <b>3</b>   | <b>1</b>  | <b>235</b>  | <b>2076</b>  |                                                      | <b>C</b>  | <b>WD</b> | <b>WD</b> |          |          | <b>C</b>  | <b>C</b>  | <b>C</b>          |
| A*24:10                                                 | 24:10                  |          |                                               | 1          | 282          | 10          | 1          | 0          | 1         | 46          | 341          |                                                      | C         | WD        |           |          |          | I         | I         | C                 |
| A*24:10:01                                              | 24:10:01               | HLA00060 |                                               | 3          | 1452         | 78          | 9          | 3          | 0         | 189         | 1734         |                                                      | C         | WD        | WD        |          |          | C         | C         | C                 |
| A*24:10:02                                              | 24:10:02               | HLA08627 |                                               | 0          | 1            | 0           | 0          | 0          | 0         | 0           | 1            |                                                      |           |           |           |          |          |           |           |                   |
| <b>A*24:13 total</b>                                    | <b>24:13 total</b>     |          |                                               | <b>0</b>   | <b>48</b>    | <b>18</b>   | <b>2</b>   | <b>26</b>  | <b>0</b>  | <b>6</b>    | <b>100</b>   |                                                      | <b>I</b>  | <b>WD</b> |           | <b>I</b> |          | <b>WD</b> | <b>WD</b> | <b>I</b>          |
| A*24:13                                                 | 24:13                  |          |                                               | 0          | 0            | 5           | 1          | 2          | 0         | 1           | 9            |                                                      |           | WD        |           |          |          |           | WD        | WD                |
| A*24:13:01                                              | 24:13:01               | HLA00063 |                                               | 0          | 41           | 4           | 0          | 1          | 0         | 2           | 48           |                                                      | I         |           |           |          |          |           | WD        | I                 |
| A*24:13:02                                              | 24:13:02               | HLA03101 |                                               | 0          | 7            | 9           | 1          | 23         | 0         | 3           | 43           |                                                      | WD        | WD        |           | I        |          |           | WD        | I                 |
| <b>A*24:14 total</b>                                    | <b>24:14 total</b>     |          |                                               | <b>11</b>  | <b>5</b>     | <b>35</b>   | <b>1</b>   | <b>281</b> | <b>9</b>  | <b>48</b>   | <b>390</b>   | <b>WD</b>                                            | <b>WD</b> | <b>WD</b> |           | <b>C</b> | <b>C</b> | <b>I</b>  | <b>I</b>  | <b>C</b>          |
| <b>A*24:14:01G total</b>                                | <b>24:14:01G total</b> |          |                                               | <b>11</b>  | <b>5</b>     | <b>35</b>   | <b>1</b>   | <b>281</b> | <b>9</b>  | <b>48</b>   | <b>390</b>   | <b>WD</b>                                            | <b>WD</b> | <b>WD</b> |           | <b>C</b> | <b>C</b> | <b>I</b>  | <b>I</b>  | <b>C</b>          |
| A*24:14                                                 | 24:14                  |          |                                               | 11         | 3            | 31          | 1          | 219        | 6         | 41          | 312          | WD                                                   |           | WD        |           | C        | WD       | I         | I         | C                 |
| A*24:14:01G                                             | 24:14:01G              |          | 24:14:01G                                     | 0          | 2            | 4           | 0          | 26         | 0         | 5           | 37           |                                                      |           |           |           | I        |          | WD        | WD        | I                 |
| A*24:14:01                                              | 24:14:01               |          | 24:14:01G                                     | 0          | 0            | 0           | 0          | 34         | 2         | 1           | 37           |                                                      |           |           |           | I        |          |           | WD        | I                 |
| A*24:14:01:02                                           | 24:14:01:02            | HLA14845 | 24:14:01G                                     | 0          | 0            | 0           | 0          | 2          | 1         | 1           | 4            |                                                      |           |           |           |          |          |           |           |                   |
| A*24:15                                                 | 24:15                  | HLA00065 |                                               | 0          | 0            | 0           | 0          | 7          | 1         | 1           | 9            |                                                      |           |           |           | WD       |          |           | WD        | WD                |
| A*24:17                                                 | 24:17                  | HLA00067 |                                               | 8          | 4923         | 98          | 35         | 4          | 20        | 100         | 5188         | WD                                                   | C         | WD        | WD        |          | C        | I         | C         | C                 |

| Supplemental Table 8: HLA-A Allele Summary <sup>a</sup> |                        |          | Allele Count by Population Group <sup>b</sup> |          |            |            |           |           |          |            |            | 3.0.0 CIWD Category by Population Group <sup>c</sup> |           |           |           |          |     |           |           |                   |    |
|---------------------------------------------------------|------------------------|----------|-----------------------------------------------|----------|------------|------------|-----------|-----------|----------|------------|------------|------------------------------------------------------|-----------|-----------|-----------|----------|-----|-----------|-----------|-------------------|----|
| Allele                                                  | Genomic Typing         | AlleleID | G group                                       | AFA      | API        | EURO       | MENA      | HIS       | NAM      | UNK        | Total      | AFA                                                  | API       | EURO      | MENA      | HIS      | NAM | UNK       | Total     | Highest Frequency |    |
| A*24:18                                                 | 24:18                  | HLA00068 |                                               | 0        | 0          | 36         | 0         | 1         | 0        | 0          | 37         |                                                      |           | WD        |           |          |     |           | WD        | WD                |    |
| <b>A*24:20 total</b>                                    | <b>24:20 total</b>     |          |                                               | <b>0</b> | <b>572</b> | <b>22</b>  | <b>14</b> | <b>4</b>  | <b>0</b> | <b>138</b> | <b>750</b> |                                                      | <b>C</b>  | <b>WD</b> | <b>WD</b> |          |     | <b>C</b>  | <b>I</b>  | <b>C</b>          |    |
| <b>A*24:20:01G total</b>                                | <b>24:20:01G total</b> |          |                                               | <b>0</b> | <b>572</b> | <b>22</b>  | <b>14</b> | <b>4</b>  | <b>0</b> | <b>138</b> | <b>750</b> |                                                      | <b>C</b>  | <b>WD</b> | <b>WD</b> |          |     | <b>C</b>  | <b>I</b>  | <b>C</b>          |    |
| A*24:20                                                 | 24:20                  |          |                                               | 0        | 567        | 20         | 14        | 4         | 0        | 138        | 743        |                                                      | C         | WD        | WD        |          |     | C         | I         | C                 |    |
| A*24:20:01G                                             | 24:20:01G              |          | 24:20:01G                                     | 0        | 5          | 2          | 0         | 0         | 0        | 0          | 7          |                                                      | WD        |           |           |          |     |           | WD        | WD                |    |
| <b>A*24:21 total</b>                                    | <b>24:21 total</b>     |          |                                               | <b>0</b> | <b>5</b>   | <b>35</b>  | <b>0</b>  | <b>0</b>  | <b>0</b> | <b>7</b>   | <b>47</b>  |                                                      | <b>WD</b> | <b>WD</b> |           |          |     | <b>WD</b> | <b>WD</b> | <b>WD</b>         |    |
| A*24:21                                                 | 24:21                  |          |                                               | 0        | 1          | 4          | 0         | 0         | 0        | 0          | 5          |                                                      |           |           |           |          |     |           | WD        | WD                |    |
| A*24:21:01                                              | 24:21:01               | HLA00969 |                                               | 0        | 2          | 30         | 0         | 0         | 0        | 7          | 39         |                                                      |           | WD        |           |          |     |           | WD        | WD                | WD |
| A*24:21:03                                              | 24:21:03               | HLA13728 |                                               | 0        | 2          | 1          | 0         | 0         | 0        | 0          | 3          |                                                      |           |           |           |          |     |           |           |                   |    |
| A*24:22                                                 | 24:22                  | HLA00970 |                                               | 5        | 1          | 16         | 1         | 250       | 12       | 32         | 317        | WD                                                   |           | WD        |           | C        | C   | I         | I         | C                 |    |
| A*24:23                                                 | 24:23                  | HLA01041 |                                               | 81       | 5          | 108        | 2         | 41        | 88       | 111        | 436        | C                                                    | WD        | WD        |           | I        | C   | I         | I         | C                 |    |
| A*24:24                                                 | 24:24                  | HLA01042 |                                               | 6        | 0          | 0          | 0         | 0         | 0        | 1          | 7          | WD                                                   |           |           |           |          |     |           | WD        | WD                |    |
| A*24:25                                                 | 24:25                  | HLA01189 |                                               | 14       | 10         | 71         | 2         | 1460      | 75       | 189        | 1821       | WD                                                   | WD        | WD        |           | C        | C   | C         | C         | C                 |    |
| <b>A*24:26 total</b>                                    | <b>24:26 total</b>     |          |                                               | <b>6</b> | <b>0</b>   | <b>101</b> | <b>39</b> | <b>26</b> | <b>0</b> | <b>18</b>  | <b>190</b> | <b>WD</b>                                            |           | <b>WD</b> | <b>WD</b> | <b>I</b> |     | <b>I</b>  | <b>I</b>  | <b>I</b>          |    |
| <b>A*24:26:01G total</b>                                | <b>24:26:01G total</b> |          |                                               | <b>6</b> | <b>0</b>   | <b>101</b> | <b>39</b> | <b>26</b> | <b>0</b> | <b>18</b>  | <b>190</b> | <b>WD</b>                                            |           | <b>WD</b> | <b>WD</b> | <b>I</b> |     | <b>I</b>  | <b>I</b>  | <b>I</b>          |    |
| A*24:26:01G                                             | 24:26:01G              |          | 24:26:01G                                     | 1        | 0          | 30         | 12        | 5         | 0        | 5          | 53         |                                                      |           | WD        | WD        | WD       |     |           | WD        | WD                | WD |
| A*24:26                                                 | 24:26                  | HLA01171 | 24:26:01G                                     | 4        | 0          | 71         | 26        | 19        | 0        | 13         | 133        |                                                      |           | WD        | WD        | I        |     |           | WD        | WD                | I  |
| A*24:314                                                | 24:314                 | HLA13634 | 24:26:01G                                     | 1        | 0          | 0          | 1         | 2         | 0        | 0          | 4          |                                                      |           |           |           |          |     |           |           |                   |    |
| A*24:28                                                 | 24:28                  | HLA01268 |                                               | 1        | 1          | 52         | 0         | 15        | 0        | 7          | 76         |                                                      |           | WD        |           | I        |     |           | WD        | WD                | I  |
| A*24:29                                                 | 24:29                  | HLA01316 |                                               | 0        | 0          | 193        | 6         | 1         | 1        | 9          | 210        |                                                      |           | I         | WD        |          |     |           | WD        | I                 | I  |
| A*24:30                                                 | 24:30                  | HLA01317 |                                               | 0        | 40         | 64         | 4         | 4         | 0        | 2          | 114        |                                                      | I         | WD        |           |          |     |           | WD        | I                 | I  |
| A*24:31                                                 | 24:31                  | HLA01330 |                                               | 1        | 3          | 431        | 0         | 2         | 0        | 8          | 445        |                                                      |           | I         |           |          |     |           | WD        | I                 | I  |
| A*24:32                                                 | 24:32                  | HLA01465 |                                               | 0        | 4          | 113        | 0         | 3         | 0        | 24         | 144        |                                                      |           | WD        |           |          |     |           | I         | WD                | I  |
| A*24:35                                                 | 24:35                  | HLA01566 |                                               | 0        | 0          | 20         | 0         | 1         | 0        | 3          | 24         |                                                      |           | WD        |           |          |     |           | WD        | WD                | WD |
| A*24:36N                                                | 24:36N                 | HLA01583 |                                               | 0        | 0          | 18         | 0         | 0         | 0        | 0          | 18         |                                                      |           | WD        |           |          |     |           | WD        | WD                | WD |
| A*24:37                                                 | 24:37                  | HLA01649 |                                               | 0        | 32         | 2          | 2         | 0         | 0        | 5          | 41         |                                                      | I         |           |           |          |     |           | WD        | WD                | I  |
| A*24:38                                                 | 24:38                  | HLA01674 |                                               | 0        | 1          | 2          | 0         | 27        | 2        | 7          | 39         |                                                      |           |           |           | I        |     |           | WD        | WD                | I  |
| A*24:39                                                 | 24:39                  | HLA01773 |                                               | 0        | 0          | 12         | 0         | 0         | 0        | 0          | 12         |                                                      |           | WD        |           |          |     |           | WD        | WD                | WD |
| A*24:41                                                 | 24:41                  | HLA01823 |                                               | 0        | 3          | 0          | 0         | 0         | 0        | 0          | 3          |                                                      |           |           |           |          |     |           |           |                   |    |
| A*24:42                                                 | 24:42                  | HLA01872 |                                               | 0        | 0          | 8          | 0         | 0         | 0        | 0          | 8          |                                                      |           | WD        |           |          |     |           | WD        | WD                | WD |

| Supplemental Table 8: HLA-A Allele Summary <sup>a</sup> |                    |          | Allele Count by Population Group <sup>b</sup> |          |          |          |          |          |          |          |          | 3.0.0 CIWD Category by Population Group <sup>c</sup> |     |      |      |     |     |     |       |                   |
|---------------------------------------------------------|--------------------|----------|-----------------------------------------------|----------|----------|----------|----------|----------|----------|----------|----------|------------------------------------------------------|-----|------|------|-----|-----|-----|-------|-------------------|
| Allele                                                  | Genomic Typing     | AlleleID | G group                                       | AFA      | API      | EURO     | MENA     | HIS      | NAM      | UNK      | Total    | AFA                                                  | API | EURO | MENA | HIS | NAM | UNK | Total | Highest Frequency |
| A*24:43                                                 | 24:43              | HLA01957 |                                               | 0        | 3        | 145      | 0        | 2        | 0        | 5        | 155      |                                                      |     | I    |      |     |     | WD  | WD    | I                 |
| A*24:46                                                 | 24:46              | HLA01988 |                                               | 0        | 1        | 3        | 0        | 1        | 0        | 2        | 7        |                                                      |     |      |      |     |     |     | WD    | WD                |
| A*24:47                                                 | 24:47              | HLA02037 |                                               | 0        | 0        | 16       | 0        | 0        | 0        | 0        | 16       |                                                      |     | WD   |      |     |     |     | WD    | WD                |
| A*24:48N                                                | 24:48N             | HLA02049 |                                               | 0        | 0        | 3        | 0        | 0        | 0        | 1        | 4        |                                                      |     |      |      |     |     |     |       |                   |
| A*24:49                                                 | 24:49              | HLA02053 |                                               | 0        | 2        | 0        | 0        | 0        | 0        | 0        | 2        |                                                      |     |      |      |     |     |     |       |                   |
| A*24:50                                                 | 24:50              | HLA02107 |                                               | 0        | 0        | 3        | 0        | 2        | 0        | 0        | 5        |                                                      |     |      |      |     |     |     | WD    | WD                |
| A*24:52                                                 | 24:52              | HLA02181 |                                               | 0        | 0        | 10       | 20       | 0        | 0        | 6        | 36       |                                                      |     | WD   | WD   |     |     | WD  | WD    | WD                |
| A*24:53                                                 | 24:53              | HLA02198 |                                               | 1        | 3        | 53       | 0        | 224      | 21       | 37       | 339      |                                                      |     | WD   |      | C   | C   | I   | I     | C                 |
| A*24:56                                                 | 24:56              | HLA02366 |                                               | 0        | 0        | 321      | 6        | 1        | 0        | 6        | 334      |                                                      |     | I    | WD   |     |     | WD  | I     | I                 |
| A*24:57                                                 | 24:57              | HLA02365 |                                               | 0        | 1        | 25       | 0        | 0        | 0        | 30       | 56       |                                                      |     | WD   |      |     |     | I   | WD    | I                 |
| A*24:58                                                 | 24:58              | HLA02401 |                                               | 0        | 0        | 233      | 0        | 1        | 0        | 11       | 245      |                                                      |     | I    |      |     |     | WD  | I     | I                 |
| A*24:59                                                 | 24:59              | HLA02417 |                                               | 0        | 1        | 1        | 0        | 0        | 0        | 1        | 3        |                                                      |     |      |      |     |     |     |       |                   |
| A*24:60N                                                | 24:60N             | HLA02443 |                                               | 0        | 0        | 0        | 1        | 0        | 0        | 0        | 1        |                                                      |     |      |      |     |     |     |       |                   |
| A*24:64                                                 | 24:64              | HLA02574 |                                               | 1        | 16       | 1        | 0        | 0        | 0        | 0        | 18       |                                                      | I   |      |      |     |     |     | WD    | I                 |
| A*24:68                                                 | 24:68              | HLA02725 |                                               | 0        | 10       | 0        | 0        | 0        | 0        | 0        | 10       |                                                      | WD  |      |      |     |     |     | WD    | WD                |
| A*24:69                                                 | 24:69              | HLA02774 |                                               | 0        | 0        | 1        | 0        | 0        | 0        | 0        | 1        |                                                      |     |      |      |     |     |     |       |                   |
| A*24:70                                                 | 24:70              | HLA02777 |                                               | 0        | 0        | 2        | 0        | 0        | 0        | 0        | 2        |                                                      |     |      |      |     |     |     |       |                   |
| A*24:71                                                 | 24:71              | HLA02788 |                                               | 0        | 0        | 8        | 2        | 0        | 0        | 0        | 10       |                                                      |     | WD   |      |     |     |     | WD    | WD                |
| A*24:72                                                 | 24:72              | HLA02860 |                                               | 0        | 2        | 168      | 0        | 1        | 0        | 3        | 174      |                                                      |     | I    |      |     |     |     | I     | I                 |
| A*24:73                                                 | 24:73              | HLA02861 |                                               | 0        | 0        | 1        | 0        | 0        | 0        | 0        | 1        |                                                      |     |      |      |     |     |     |       |                   |
| <b>A*24:74 total</b>                                    | <b>24:74 total</b> |          |                                               | <b>0</b> | <b>1</b> | <b>2</b> | <b>0</b> | <b>0</b> | <b>0</b> | <b>0</b> | <b>3</b> |                                                      |     |      |      |     |     |     |       |                   |
| A*24:74                                                 | 24:74              |          |                                               | 0        | 0        | 1        | 0        | 0        | 0        | 0        | 1        |                                                      |     |      |      |     |     |     |       |                   |
| A*24:74:01                                              | 24:74:01           | HLA02862 |                                               | 0        | 1        | 0        | 0        | 0        | 0        | 0        | 1        |                                                      |     |      |      |     |     |     |       |                   |
| A*24:74:02                                              | 24:74:02           | HLA09485 |                                               | 0        | 0        | 1        | 0        | 0        | 0        | 0        | 1        |                                                      |     |      |      |     |     |     |       |                   |
| A*24:77                                                 | 24:77              | HLA02958 |                                               | 0        | 1        | 1        | 0        | 0        | 0        | 0        | 2        |                                                      |     |      |      |     |     |     |       |                   |
| A*24:80                                                 | 24:80              | HLA03000 |                                               | 0        | 0        | 1        | 0        | 0        | 0        | 0        | 1        |                                                      |     |      |      |     |     |     |       |                   |
| A*24:81                                                 | 24:81              | HLA03031 |                                               | 0        | 0        | 83       | 0        | 3        | 1        | 17       | 104      |                                                      |     | WD   |      |     |     | I   | WD    | I                 |
| A*24:82                                                 | 24:82              | HLA03032 |                                               | 0        | 2        | 0        | 0        | 0        | 0        | 0        | 2        |                                                      |     |      |      |     |     |     |       |                   |
| A*24:84N                                                | 24:84N             | HLA03154 |                                               | 0        | 0        | 8        | 0        | 0        | 0        | 1        | 9        |                                                      |     | WD   |      |     |     |     | WD    | WD                |
| A*24:85                                                 | 24:85              | HLA03201 |                                               | 0        | 1        | 0        | 0        | 0        | 0        | 0        | 1        |                                                      |     |      |      |     |     |     |       |                   |

| Supplemental Table 8: HLA-A Allele Summary <sup>a</sup> |                     |          | Allele Count by Population Group <sup>b</sup> |          |          |           |          |          |          |          |           | 3.0.0 CIWD Category by Population Group <sup>c</sup> |     |           |      |     |     |     |           |                   |
|---------------------------------------------------------|---------------------|----------|-----------------------------------------------|----------|----------|-----------|----------|----------|----------|----------|-----------|------------------------------------------------------|-----|-----------|------|-----|-----|-----|-----------|-------------------|
| Allele                                                  | Genomic Typing      | AlleleID | G group                                       | AFA      | API      | EURO      | MENA     | HIS      | NAM      | UNK      | Total     | AFA                                                  | API | EURO      | MENA | HIS | NAM | UNK | Total     | Highest Frequency |
| A*24:86N                                                | 24:86N              | HLA03251 |                                               | 0        | 0        | 1         | 0        | 0        | 0        | 0        | 1         |                                                      |     |           |      |     |     |     |           |                   |
| A*24:87                                                 | 24:87               | HLA03331 |                                               | 0        | 1        | 6         | 2        | 1        | 0        | 6        | 16        |                                                      |     | WD        |      |     |     | WD  | WD        | WD                |
| <b>A*24:90N total</b>                                   | <b>24:90N total</b> |          |                                               | <b>2</b> | <b>1</b> | <b>12</b> | <b>0</b> | <b>1</b> | <b>0</b> | <b>3</b> | <b>19</b> |                                                      |     | <b>WD</b> |      |     |     |     | <b>WD</b> | <b>WD</b>         |
| A*24:90N                                                | 24:90N              |          |                                               | 2        | 0        | 10        | 0        | 1        | 0        | 3        | 16        |                                                      |     | WD        |      |     |     |     | WD        | WD                |
| A*24:90:01N                                             | 24:90:01N           | HLA03352 |                                               | 0        | 0        | 2         | 0        | 0        | 0        | 0        | 2         |                                                      |     |           |      |     |     |     |           |                   |
| A*24:90:02N                                             | 24:90:02N           | HLA13951 |                                               | 0        | 1        | 0         | 0        | 0        | 0        | 0        | 1         |                                                      |     |           |      |     |     |     |           |                   |
| A*24:91                                                 | 24:91               | HLA03395 |                                               | 0        | 1        | 0         | 0        | 0        | 0        | 0        | 1         |                                                      |     |           |      |     |     |     |           |                   |
| A*24:95                                                 | 24:95               | HLA03535 |                                               | 3        | 1        | 20        | 7        | 77       | 1        | 44       | 153       |                                                      |     | WD        | WD   | C   |     | I   | WD        | C                 |
| A*24:97                                                 | 24:97               | HLA03569 |                                               | 0        | 19       | 0         | 0        | 0        | 0        | 0        | 19        |                                                      | I   |           |      |     |     |     | WD        | I                 |
| A*24:99                                                 | 24:99               | HLA03618 |                                               | 0        | 0        | 4         | 0        | 0        | 0        | 0        | 4         |                                                      |     |           |      |     |     |     |           |                   |
| A*24:100                                                | 24:100              | HLA04894 |                                               | 0        | 0        | 1         | 0        | 0        | 0        | 0        | 1         |                                                      |     |           |      |     |     |     |           |                   |
| A*24:102                                                | 24:102              | HLA04896 |                                               | 0        | 0        | 0         | 2        | 0        | 0        | 0        | 2         |                                                      |     |           |      |     |     |     |           |                   |
| A*24:103                                                | 24:103              | HLA04897 |                                               | 0        | 0        | 9         | 0        | 0        | 0        | 0        | 9         |                                                      |     | WD        |      |     |     |     | WD        | WD                |
| A*24:104                                                | 24:104              | HLA04898 |                                               | 0        | 0        | 8         | 0        | 0        | 0        | 0        | 8         |                                                      |     | WD        |      |     |     |     | WD        | WD                |
| A*24:105                                                | 24:105              | HLA04899 |                                               | 0        | 0        | 5         | 0        | 0        | 0        | 0        | 5         |                                                      |     | WD        |      |     |     |     | WD        | WD                |
| A*24:106                                                | 24:106              | HLA04905 |                                               | 0        | 0        | 74        | 0        | 0        | 0        | 3        | 77        |                                                      |     | WD        |      |     |     |     | WD        | WD                |
| A*24:107                                                | 24:107              | HLA04862 |                                               | 0        | 0        | 0         | 0        | 2        | 2        | 1        | 5         |                                                      |     |           |      |     |     |     | WD        | WD                |
| A*24:108                                                | 24:108              | HLA04863 |                                               | 0        | 0        | 4         | 2        | 0        | 0        | 1        | 7         |                                                      |     |           |      |     |     |     | WD        | WD                |
| A*24:110                                                | 24:110              | HLA04908 |                                               | 0        | 0        | 17        | 0        | 0        | 0        | 0        | 17        |                                                      |     | WD        |      |     |     |     | WD        | WD                |
| A*24:111                                                | 24:111              | HLA04909 |                                               | 0        | 0        | 1         | 0        | 0        | 0        | 0        | 1         |                                                      |     |           |      |     |     |     |           |                   |
| A*24:113                                                | 24:113              | HLA04926 |                                               | 0        | 0        | 1         | 0        | 0        | 0        | 0        | 1         |                                                      |     |           |      |     |     |     |           |                   |
| A*24:115                                                | 24:115              | HLA04942 |                                               | 0        | 0        | 1         | 0        | 0        | 0        | 0        | 1         |                                                      |     |           |      |     |     |     |           |                   |
| A*24:116                                                | 24:116              | HLA04950 |                                               | 0        | 0        | 1         | 0        | 1        | 0        | 0        | 2         |                                                      |     |           |      |     |     |     |           |                   |
| A*24:117                                                | 24:117              | HLA04954 |                                               | 0        | 0        | 2         | 0        | 0        | 0        | 0        | 2         |                                                      |     |           |      |     |     |     |           |                   |
| A*24:118                                                | 24:118              | HLA04955 |                                               | 0        | 0        | 10        | 0        | 0        | 0        | 0        | 10        |                                                      |     | WD        |      |     |     |     | WD        | WD                |
| A*24:120                                                | 24:120              | HLA04957 |                                               | 0        | 3        | 2         | 0        | 0        | 0        | 0        | 5         |                                                      |     |           |      |     |     |     | WD        | WD                |
| A*24:121                                                | 24:121              | HLA04958 |                                               | 0        | 3        | 16        | 0        | 1        | 0        | 2        | 22        |                                                      |     | WD        |      |     |     |     | WD        | WD                |
| A*24:122                                                | 24:122              | HLA04988 |                                               | 0        | 0        | 10        | 0        | 0        | 0        | 0        | 10        |                                                      |     | WD        |      |     |     |     | WD        | WD                |
| A*24:123                                                | 24:123              | HLA05006 |                                               | 0        | 0        | 1         | 6        | 0        | 0        | 1        | 8         |                                                      |     |           | WD   |     |     |     | WD        | WD                |
| A*24:124                                                | 24:124              | HLA05007 |                                               | 0        | 0        | 0         | 1        | 0        | 0        | 0        | 1         |                                                      |     |           |      |     |     |     |           |                   |

| Supplemental Table 8: HLA-A Allele Summary <sup>a</sup> |                     |          | Allele Count by Population Group <sup>b</sup> |          |          |          |          |          |          |          |          | 3.0.0 CIWD Category by Population Group <sup>c</sup> |     |      |      |     |     |     |       |                   |    |
|---------------------------------------------------------|---------------------|----------|-----------------------------------------------|----------|----------|----------|----------|----------|----------|----------|----------|------------------------------------------------------|-----|------|------|-----|-----|-----|-------|-------------------|----|
| Allele                                                  | Genomic Typing      | AlleleID | G group                                       | AFA      | API      | EURO     | MENA     | HIS      | NAM      | UNK      | Total    | AFA                                                  | API | EURO | MENA | HIS | NAM | UNK | Total | Highest Frequency |    |
| A*24:126                                                | 24:126              | HLA05019 |                                               | 0        | 0        | 0        | 0        | 1        | 0        | 1        | 2        |                                                      |     |      |      |     |     |     |       |                   |    |
| A*24:128                                                | 24:128              | HLA04870 |                                               | 0        | 3        | 0        | 0        | 0        | 0        | 0        | 3        |                                                      |     |      |      |     |     |     |       |                   |    |
| A*24:130                                                | 24:130              | HLA04876 |                                               | 0        | 5        | 0        | 0        | 0        | 0        | 0        | 5        |                                                      | WD  |      |      |     |     |     | WD    | WD                |    |
| <b>A*24:135 total</b>                                   | <b>24:135 total</b> |          |                                               | <b>0</b> | <b>1</b> | <b>1</b> | <b>0</b> | <b>1</b> | <b>0</b> | <b>1</b> | <b>4</b> |                                                      |     |      |      |     |     |     |       |                   |    |
| A*24:135:01                                             | 24:135:01           | HLA05107 |                                               | 0        | 0        | 1        | 0        | 1        | 0        | 0        | 2        |                                                      |     |      |      |     |     |     |       |                   |    |
| A*24:135:02                                             | 24:135:02           | HLA08585 |                                               | 0        | 1        | 0        | 0        | 0        | 0        | 1        | 2        |                                                      |     |      |      |     |     |     |       |                   |    |
| A*24:136                                                | 24:136              | HLA05084 |                                               | 0        | 0        | 3        | 0        | 1        | 0        | 0        | 4        |                                                      |     |      |      |     |     |     |       |                   |    |
| A*24:138                                                | 24:138              | HLA05086 |                                               | 0        | 0        | 0        | 0        | 4        | 0        | 1        | 5        |                                                      |     |      |      |     |     |     |       | WD                | WD |
| A*24:140                                                | 24:140              | HLA05110 |                                               | 0        | 8        | 0        | 0        | 0        | 0        | 0        | 8        |                                                      | WD  |      |      |     |     |     |       | WD                | WD |
| <b>A*24:142 total</b>                                   | <b>24:142 total</b> |          |                                               | <b>0</b> | <b>1</b> | <b>0</b> | <b>0</b> | <b>0</b> | <b>0</b> | <b>0</b> | <b>1</b> |                                                      |     |      |      |     |     |     |       |                   |    |
| A*24:142                                                | 24:142              |          |                                               | 0        | 1        | 0        | 0        | 0        | 0        | 0        | 1        |                                                      |     |      |      |     |     |     |       |                   |    |
| A*24:143                                                | 24:143              | HLA05240 |                                               | 0        | 1        | 0        | 0        | 0        | 0        | 0        | 1        |                                                      |     |      |      |     |     |     |       |                   |    |
| A*24:145                                                | 24:145              | HLA05550 |                                               | 0        | 0        | 6        | 0        | 0        | 0        | 14       | 20       |                                                      |     | WD   |      |     |     | I   | WD    | I                 |    |
| A*24:146                                                | 24:146              | HLA05673 |                                               | 0        | 0        | 0        | 10       | 0        | 0        | 0        | 10       |                                                      |     |      | WD   |     |     |     |       | WD                | WD |
| A*24:148                                                | 24:148              | HLA05679 |                                               | 0        | 0        | 2        | 0        | 0        | 0        | 0        | 2        |                                                      |     |      |      |     |     |     |       |                   |    |
| A*24:151                                                | 24:151              | HLA05797 |                                               | 0        | 1        | 0        | 0        | 0        | 0        | 0        | 1        |                                                      |     |      |      |     |     |     |       |                   |    |
| A*24:156                                                | 24:156              | HLA06004 |                                               | 0        | 2        | 0        | 0        | 0        | 0        | 1        | 3        |                                                      |     |      |      |     |     |     |       |                   |    |
| A*24:157                                                | 24:157              | HLA06014 |                                               | 0        | 0        | 2        | 0        | 0        | 0        | 2        | 4        |                                                      |     |      |      |     |     |     |       |                   |    |
| A*24:159                                                | 24:159              | HLA06064 |                                               | 0        | 0        | 0        | 0        | 7        | 1        | 1        | 9        |                                                      |     |      |      | WD  |     |     |       | WD                | WD |
| A*24:164                                                | 24:164              | HLA06119 |                                               | 0        | 0        | 7        | 0        | 0        | 0        | 0        | 7        |                                                      |     | WD   |      |     |     |     |       | WD                | WD |
| A*24:165                                                | 24:165              | HLA06196 |                                               | 0        | 5        | 0        | 0        | 0        | 0        | 1        | 6        |                                                      | WD  |      |      |     |     |     |       | WD                | WD |
| A*24:166                                                | 24:166              | HLA06197 |                                               | 0        | 2        | 0        | 0        | 0        | 0        | 0        | 2        |                                                      |     |      |      |     |     |     |       |                   |    |
| A*24:167                                                | 24:167              | HLA06202 |                                               | 0        | 0        | 4        | 0        | 0        | 0        | 0        | 4        |                                                      |     |      |      |     |     |     |       |                   |    |
| A*24:168                                                | 24:168              | HLA06203 |                                               | 0        | 0        | 7        | 0        | 0        | 0        | 1        | 8        |                                                      |     | WD   |      |     |     |     |       | WD                | WD |
| A*24:169                                                | 24:169              | HLA06207 |                                               | 0        | 3        | 5        | 0        | 0        | 0        | 2        | 10       |                                                      |     | WD   |      |     |     |     |       | WD                | WD |
| <b>A*24:172 total</b>                                   | <b>24:172 total</b> |          |                                               | <b>0</b> | <b>0</b> | <b>1</b> | <b>0</b> | <b>0</b> | <b>0</b> | <b>1</b> | <b>2</b> |                                                      |     |      |      |     |     |     |       |                   |    |
| A*24:172:01                                             | 24:172:01           | HLA06333 |                                               | 0        | 0        | 1        | 0        | 0        | 0        | 1        | 2        |                                                      |     |      |      |     |     |     |       |                   |    |
| A*24:173                                                | 24:173              | HLA06545 |                                               | 0        | 0        | 2        | 0        | 0        | 0        | 7        | 9        |                                                      |     |      |      |     |     |     | WD    | WD                | WD |
| A*24:175                                                | 24:175              | HLA06556 |                                               | 0        | 0        | 13       | 0        | 6        | 0        | 18       | 37       |                                                      |     | WD   |      | WD  |     | I   | WD    | I                 |    |
| A*24:176                                                | 24:176              | HLA06557 |                                               | 0        | 0        | 10       | 0        | 0        | 0        | 0        | 10       |                                                      |     | WD   |      |     |     |     |       | WD                | WD |

| Supplemental Table 8: HLA-A Allele Summary <sup>a</sup> |                     |          | Allele Count by Population Group <sup>b</sup> |          |          |          |          |          |          |          |          | 3.0.0 CIWD Category by Population Group <sup>c</sup> |     |           |      |     |     |     |           |                   |  |
|---------------------------------------------------------|---------------------|----------|-----------------------------------------------|----------|----------|----------|----------|----------|----------|----------|----------|------------------------------------------------------|-----|-----------|------|-----|-----|-----|-----------|-------------------|--|
| Allele                                                  | Genomic Typing      | AlleleID | G group                                       | AFA      | API      | EURO     | MENA     | HIS      | NAM      | UNK      | Total    | AFA                                                  | API | EURO      | MENA | HIS | NAM | UNK | Total     | Highest Frequency |  |
| A*24:177                                                | 24:177              | HLA06568 |                                               | 0        | 0        | 1        | 0        | 0        | 0        | 0        | 1        |                                                      |     |           |      |     |     |     |           |                   |  |
| A*24:179                                                | 24:179              | HLA06751 |                                               | 0        | 0        | 0        | 0        | 1        | 0        | 0        | 1        |                                                      |     |           |      |     |     |     |           |                   |  |
| A*24:180                                                | 24:180              | HLA06752 |                                               | 0        | 0        | 0        | 0        | 7        | 1        | 0        | 8        |                                                      |     |           |      | WD  |     |     | WD        | WD                |  |
| A*24:184                                                | 24:184              | HLA07176 |                                               | 0        | 0        | 4        | 0        | 0        | 0        | 0        | 4        |                                                      |     |           |      |     |     |     |           |                   |  |
| A*24:187                                                | 24:187              | HLA07399 |                                               | 0        | 0        | 0        | 0        | 0        | 0        | 1        | 1        |                                                      |     |           |      |     |     |     |           |                   |  |
| A*24:189                                                | 24:189              | HLA07417 |                                               | 0        | 1        | 0        | 0        | 0        | 0        | 0        | 1        |                                                      |     |           |      |     |     |     |           |                   |  |
| A*24:192                                                | 24:192              | HLA07588 |                                               | 1        | 0        | 0        | 0        | 4        | 0        | 2        | 7        |                                                      |     |           |      |     |     |     | WD        | WD                |  |
| A*24:193                                                | 24:193              | HLA07589 |                                               | 0        | 0        | 8        | 0        | 0        | 0        | 0        | 8        |                                                      |     | WD        |      |     |     |     | WD        | WD                |  |
| A*24:194                                                | 24:194              | HLA07590 |                                               | 0        | 4        | 0        | 0        | 0        | 0        | 1        | 5        |                                                      |     |           |      |     |     |     | WD        | WD                |  |
| A*24:195                                                | 24:195              | HLA07591 |                                               | 0        | 0        | 1        | 0        | 0        | 0        | 0        | 1        |                                                      |     |           |      |     |     |     |           |                   |  |
| A*24:196                                                | 24:196              | HLA07592 |                                               | 0        | 16       | 0        | 0        | 0        | 0        | 0        | 16       |                                                      | I   |           |      |     |     |     | WD        | I                 |  |
| A*24:197                                                | 24:197              | HLA07593 |                                               | 0        | 0        | 1        | 0        | 0        | 0        | 0        | 1        |                                                      |     |           |      |     |     |     |           |                   |  |
| A*24:198                                                | 24:198              | HLA07750 |                                               | 0        | 4        | 0        | 0        | 0        | 0        | 0        | 4        |                                                      |     |           |      |     |     |     |           |                   |  |
| A*24:201                                                | 24:201              | HLA07985 |                                               | 0        | 1        | 0        | 0        | 0        | 0        | 0        | 1        |                                                      |     |           |      |     |     |     |           |                   |  |
| A*24:202                                                | 24:202              | HLA08024 |                                               | 0        | 0        | 2        | 0        | 0        | 0        | 0        | 2        |                                                      |     |           |      |     |     |     |           |                   |  |
| A*24:203                                                | 24:203              | HLA08025 |                                               | 0        | 0        | 10       | 0        | 0        | 0        | 0        | 10       |                                                      |     | WD        |      |     |     |     | WD        | WD                |  |
| A*24:204                                                | 24:204              | HLA08115 |                                               | 0        | 0        | 2        | 0        | 0        | 0        | 0        | 2        |                                                      |     |           |      |     |     |     |           |                   |  |
| A*24:205                                                | 24:205              | HLA08270 |                                               | 0        | 0        | 2        | 0        | 3        | 0        | 1        | 6        |                                                      |     |           |      |     |     |     | WD        | WD                |  |
| A*24:206                                                | 24:206              | HLA08275 |                                               | 0        | 2        | 5        | 0        | 1        | 0        | 1        | 9        |                                                      |     | WD        |      |     |     |     | WD        | WD                |  |
| <b>A*24:207 total</b>                                   | <b>24:207 total</b> |          |                                               | <b>0</b> | <b>4</b> | <b>0</b> | <b>1</b> | <b>2</b> | <b>0</b> | <b>1</b> | <b>8</b> |                                                      |     |           |      |     |     |     | <b>WD</b> | <b>WD</b>         |  |
| A*24:207                                                | 24:207              |          |                                               | 0        | 4        | 0        | 1        | 2        | 0        | 1        | 8        |                                                      |     |           |      |     |     |     | WD        | WD                |  |
| A*24:209                                                | 24:209              | HLA08279 |                                               | 0        | 1        | 0        | 0        | 0        | 0        | 0        | 1        |                                                      |     |           |      |     |     |     |           |                   |  |
| A*24:213                                                | 24:213              | HLA08560 |                                               | 0        | 0        | 1        | 0        | 0        | 0        | 0        | 1        |                                                      |     |           |      |     |     |     |           |                   |  |
| A*24:214                                                | 24:214              | HLA08484 |                                               | 0        | 0        | 0        | 0        | 0        | 0        | 1        | 1        |                                                      |     |           |      |     |     |     |           |                   |  |
| A*24:215                                                | 24:215              | HLA08602 |                                               | 0        | 0        | 2        | 0        | 0        | 0        | 0        | 2        |                                                      |     |           |      |     |     |     |           |                   |  |
| A*24:216                                                | 24:216              | HLA08625 |                                               | 0        | 1        | 0        | 0        | 0        | 0        | 0        | 1        |                                                      |     |           |      |     |     |     |           |                   |  |
| A*24:218                                                | 24:218              | HLA08630 |                                               | 0        | 0        | 0        | 0        | 0        | 0        | 1        | 1        |                                                      |     |           |      |     |     |     |           |                   |  |
| A*24:219                                                | 24:219              | HLA08631 |                                               | 0        | 0        | 1        | 0        | 0        | 0        | 0        | 1        |                                                      |     |           |      |     |     |     |           |                   |  |
| A*24:220                                                | 24:220              | HLA08632 |                                               | 0        | 0        | 0        | 1        | 0        | 0        | 4        | 5        |                                                      |     |           |      |     |     |     | WD        | WD                |  |
| <b>A*24:226 total</b>                                   | <b>24:226 total</b> |          |                                               | <b>0</b> | <b>0</b> | <b>5</b> | <b>0</b> | <b>0</b> | <b>0</b> | <b>0</b> | <b>5</b> |                                                      |     | <b>WD</b> |      |     |     |     | <b>WD</b> | <b>WD</b>         |  |

| Supplemental Table 8: HLA-A Allele Summary <sup>a</sup> |                |          | Allele Count by Population Group <sup>b</sup> |     |     |      |      |     |     |     |       | 3.0.0 CIWD Category by Population Group <sup>c</sup> |     |      |      |     |     |     |       |                   |  |
|---------------------------------------------------------|----------------|----------|-----------------------------------------------|-----|-----|------|------|-----|-----|-----|-------|------------------------------------------------------|-----|------|------|-----|-----|-----|-------|-------------------|--|
| Allele                                                  | Genomic Typing | AlleleID | G group                                       | AFA | API | EURO | MENA | HIS | NAM | UNK | Total | AFA                                                  | API | EURO | MENA | HIS | NAM | UNK | Total | Highest Frequency |  |
| A*24:226                                                | 24:226         |          |                                               | 0   | 0   | 2    | 0    | 0   | 0   | 0   | 2     |                                                      |     |      |      |     |     |     |       |                   |  |
| A*24:226:01                                             | 24:226:01      | HLA08950 |                                               | 0   | 0   | 3    | 0    | 0   | 0   | 0   | 3     |                                                      |     |      |      |     |     |     |       |                   |  |
| A*24:228                                                | 24:228         | HLA08964 |                                               | 0   | 0   | 19   | 0    | 0   | 0   | 0   | 19    |                                                      |     | WD   |      |     |     |     | WD    | WD                |  |
| A*24:229                                                | 24:229         | HLA09078 |                                               | 0   | 0   | 4    | 0    | 0   | 0   | 0   | 4     |                                                      |     |      |      |     |     |     |       |                   |  |
| A*24:230                                                | 24:230         | HLA09109 |                                               | 0   | 1   | 0    | 0    | 0   | 0   | 0   | 1     |                                                      |     |      |      |     |     |     |       |                   |  |
| A*24:234                                                | 24:234         | HLA09495 |                                               | 0   | 2   | 4    | 0    | 0   | 0   | 0   | 6     |                                                      |     |      |      |     |     |     | WD    | WD                |  |
| A*24:236                                                | 24:236         | HLA09532 |                                               | 0   | 0   | 2    | 0    | 1   | 0   | 0   | 3     |                                                      |     |      |      |     |     |     |       |                   |  |
| A*24:238                                                | 24:238         | HLA09534 |                                               | 0   | 0   | 3    | 0    | 0   | 0   | 0   | 3     |                                                      |     |      |      |     |     |     |       |                   |  |
| A*24:243                                                | 24:243         | HLA09791 |                                               | 0   | 0   | 4    | 0    | 0   | 0   | 0   | 4     |                                                      |     |      |      |     |     |     |       |                   |  |
| A*24:244                                                | 24:244         | HLA09792 |                                               | 0   | 1   | 0    | 0    | 0   | 0   | 0   | 1     |                                                      |     |      |      |     |     |     |       |                   |  |
| A*24:246                                                | 24:246         | HLA09797 |                                               | 0   | 1   | 0    | 0    | 0   | 0   | 0   | 1     |                                                      |     |      |      |     |     |     |       |                   |  |
| A*24:252N                                               | 24:252N        | HLA10267 |                                               | 0   | 0   | 5    | 5    | 0   | 0   | 0   | 10    |                                                      |     | WD   | WD   |     |     |     | WD    | WD                |  |
| A*24:253                                                | 24:253         | HLA10381 |                                               | 0   | 1   | 0    | 0    | 0   | 0   | 0   | 1     |                                                      |     |      |      |     |     |     |       |                   |  |
| A*24:254                                                | 24:254         | HLA10444 |                                               | 0   | 4   | 0    | 0    | 0   | 0   | 0   | 4     |                                                      |     |      |      |     |     |     |       |                   |  |
| A*24:255                                                | 24:255         | HLA10448 |                                               | 0   | 2   | 0    | 0    | 0   | 0   | 0   | 2     |                                                      |     |      |      |     |     |     |       |                   |  |
| A*24:258                                                | 24:258         | HLA10673 |                                               | 0   | 0   | 1    | 0    | 0   | 0   | 0   | 1     |                                                      |     |      |      |     |     |     |       |                   |  |
| A*24:261                                                | 24:261         | HLA10819 |                                               | 0   | 0   | 1    | 0    | 0   | 0   | 0   | 1     |                                                      |     |      |      |     |     |     |       |                   |  |
| A*24:262                                                | 24:262         | HLA10827 |                                               | 0   | 0   | 0    | 1    | 0   | 0   | 0   | 1     |                                                      |     |      |      |     |     |     |       |                   |  |
| A*24:273                                                | 24:273         | HLA10893 |                                               | 0   | 1   | 1    | 0    | 0   | 0   | 0   | 2     |                                                      |     |      |      |     |     |     |       |                   |  |
| A*24:275                                                | 24:275         | HLA10975 |                                               | 0   | 0   | 0    | 0    | 0   | 0   | 1   | 1     |                                                      |     |      |      |     |     |     |       |                   |  |
| A*24:277                                                | 24:277         | HLA10977 |                                               | 0   | 0   | 2    | 0    | 0   | 0   | 0   | 2     |                                                      |     |      |      |     |     |     |       |                   |  |
| A*24:279                                                | 24:279         | HLA11212 |                                               | 0   | 1   | 0    | 0    | 0   | 0   | 0   | 1     |                                                      |     |      |      |     |     |     |       |                   |  |
| A*24:280                                                | 24:280         | HLA11397 |                                               | 0   | 0   | 3    | 0    | 0   | 0   | 1   | 4     |                                                      |     |      |      |     |     |     |       |                   |  |
| A*24:284                                                | 24:284         | HLA11795 |                                               | 0   | 1   | 0    | 0    | 0   | 0   | 1   | 2     |                                                      |     |      |      |     |     |     |       |                   |  |
| A*24:287                                                | 24:287         | HLA12077 |                                               | 0   | 1   | 0    | 0    | 0   | 0   | 0   | 1     |                                                      |     |      |      |     |     |     |       |                   |  |
| A*24:291                                                | 24:291         | HLA12459 |                                               | 0   | 1   | 0    | 0    | 0   | 0   | 0   | 1     |                                                      |     |      |      |     |     |     |       |                   |  |
| A*24:292                                                | 24:292         | HLA12633 |                                               | 0   | 0   | 0    | 0    | 0   | 0   | 1   | 1     |                                                      |     |      |      |     |     |     |       |                   |  |
| A*24:293                                                | 24:293         | HLA12634 |                                               | 0   | 0   | 0    | 0    | 1   | 0   | 0   | 1     |                                                      |     |      |      |     |     |     |       |                   |  |
| A*24:296                                                | 24:296         | HLA12949 |                                               | 0   | 0   | 0    | 0    | 1   | 0   | 0   | 1     |                                                      |     |      |      |     |     |     |       |                   |  |
| A*24:298                                                | 24:298         | HLA12951 |                                               | 0   | 0   | 0    | 0    | 0   | 0   | 1   | 1     |                                                      |     |      |      |     |     |     |       |                   |  |

| Supplemental Table 8: HLA-A Allele Summary <sup>a</sup> |                     |          | Allele Count by Population Group <sup>b</sup> |             |            |               |             |             |            |              |               | 3.0.0 CIWD Category by Population Group <sup>c</sup> |          |          |          |          |          |          |          |                   |          |
|---------------------------------------------------------|---------------------|----------|-----------------------------------------------|-------------|------------|---------------|-------------|-------------|------------|--------------|---------------|------------------------------------------------------|----------|----------|----------|----------|----------|----------|----------|-------------------|----------|
| Allele                                                  | Genomic Typing      | AlleleID | G group                                       | AFA         | API        | EURO          | MENA        | HIS         | NAM        | UNK          | Total         | AFA                                                  | API      | EURO     | MENA     | HIS      | NAM      | UNK      | Total    | Highest Frequency |          |
| A*24:300                                                | 24:300              | HLA12953 |                                               | 0           | 0          | 1             | 0           | 0           | 0          | 0            | 1             |                                                      |          |          |          |          |          |          |          |                   |          |
| A*24:301                                                | 24:301              | HLA12955 |                                               | 0           | 1          | 0             | 0           | 0           | 0          | 0            | 1             |                                                      |          |          |          |          |          |          |          |                   |          |
| A*24:302                                                | 24:302              | HLA12956 |                                               | 0           | 0          | 1             | 0           | 0           | 0          | 0            | 1             |                                                      |          |          |          |          |          |          |          |                   |          |
| A*24:307                                                | 24:307              | HLA13444 |                                               | 0           | 0          | 0             | 0           | 2           | 1          | 0            | 3             |                                                      |          |          |          |          |          |          |          |                   |          |
| A*24:308                                                | 24:308              | HLA13455 |                                               | 0           | 0          | 0             | 0           | 1           | 0          | 0            | 1             |                                                      |          |          |          |          |          |          |          |                   |          |
| A*24:309                                                | 24:309              | HLA13504 |                                               | 0           | 0          | 1             | 0           | 0           | 0          | 0            | 1             |                                                      |          |          |          |          |          |          |          |                   |          |
| <b>A*24:310 total</b>                                   | <b>24:310 total</b> |          |                                               | <b>0</b>    | <b>0</b>   | <b>0</b>      | <b>0</b>    | <b>2</b>    | <b>0</b>   | <b>0</b>     | <b>2</b>      |                                                      |          |          |          |          |          |          |          |                   |          |
| A*24:310                                                | 24:310              |          |                                               | 0           | 0          | 0             | 0           | 1           | 0          | 0            | 1             |                                                      |          |          |          |          |          |          |          |                   |          |
| A*24:310:02                                             | 24:310:02           | HLA13646 |                                               | 0           | 0          | 0             | 0           | 1           | 0          | 0            | 1             |                                                      |          |          |          |          |          |          |          |                   |          |
| A*24:311                                                | 24:311              | HLA13645 |                                               | 0           | 1          | 0             | 0           | 0           | 0          | 0            | 1             |                                                      |          |          |          |          |          |          |          |                   |          |
| A*24:312N                                               | 24:312N             | HLA13726 |                                               | 0           | 0          | 0             | 1           | 0           | 0          | 0            | 1             |                                                      |          |          |          |          |          |          |          |                   |          |
| A*24:318                                                | 24:318              | HLA13844 |                                               | 0           | 1          | 1             | 0           | 0           | 0          | 0            | 2             |                                                      |          |          |          |          |          |          |          |                   |          |
| A*24:320                                                | 24:320              | HLA13953 |                                               | 0           | 0          | 2             | 0           | 0           | 0          | 0            | 2             |                                                      |          |          |          |          |          |          |          |                   |          |
| A*24:321                                                | 24:321              | HLA13784 |                                               | 0           | 0          | 0             | 0           | 0           | 0          | 1            | 1             |                                                      |          |          |          |          |          |          |          |                   |          |
| A*24:324                                                | 24:324              | HLA14282 |                                               | 0           | 1          | 0             | 0           | 1           | 0          | 0            | 2             |                                                      |          |          |          |          |          |          |          |                   |          |
| A*24:330                                                | 24:330              | HLA14502 |                                               | 0           | 0          | 1             | 0           | 0           | 0          | 0            | 1             |                                                      |          |          |          |          |          |          |          |                   |          |
| A*24:332                                                | 24:332              | HLA14504 |                                               | 0           | 1          | 0             | 0           | 0           | 0          | 0            | 1             |                                                      |          |          |          |          |          |          |          |                   |          |
| A*24:339                                                | 24:339              | HLA14914 |                                               | 0           | 2          | 0             | 0           | 0           | 0          | 0            | 2             |                                                      |          |          |          |          |          |          |          |                   |          |
| A*24:345                                                | 24:345              | HLA15240 |                                               | 0           | 4          | 0             | 0           | 0           | 0          | 0            | 4             |                                                      |          |          |          |          |          |          |          |                   |          |
| <b>A*24:347 total</b>                                   | <b>24:347 total</b> |          |                                               | <b>0</b>    | <b>2</b>   | <b>0</b>      | <b>0</b>    | <b>0</b>    | <b>0</b>   | <b>0</b>     | <b>2</b>      |                                                      |          |          |          |          |          |          |          |                   |          |
| A*24:347                                                | 24:347              |          |                                               | 0           | 2          | 0             | 0           | 0           | 0          | 0            | 2             |                                                      |          |          |          |          |          |          |          |                   |          |
| A*24:356                                                | 24:356              | HLA15818 |                                               | 0           | 1          | 0             | 1           | 0           | 0          | 0            | 2             |                                                      |          |          |          |          |          |          |          |                   |          |
| A*24:359N                                               | 24:359N             | HLA15838 |                                               | 0           | 0          | 1             | 0           | 0           | 0          | 0            | 1             |                                                      |          |          |          |          |          |          |          |                   |          |
| A*24:360                                                | 24:360              | HLA15957 |                                               | 0           | 1          | 1             | 0           | 0           | 0          | 0            | 2             |                                                      |          |          |          |          |          |          |          |                   |          |
| A*24:365                                                | 24:365              | HLA15953 |                                               | 0           | 1          | 0             | 0           | 0           | 0          | 0            | 1             |                                                      |          |          |          |          |          |          |          |                   |          |
| A*24:366                                                | 24:366              | HLA15954 |                                               | 0           | 0          | 0             | 0           | 0           | 0          | 2            | 2             |                                                      |          |          |          |          |          |          |          |                   |          |
| A*24:CODE                                               | 24:CODE             |          |                                               | 1102        | 7087       | 97434         | 2366        | 9314        | 810        | 14586        | 132699        | NA                                                   | NA       | NA       | NA       | NA       | NA       | NA       | NA       | NA                | NA       |
| <b>A*25:01 total</b>                                    | <b>25:01 total</b>  |          |                                               | <b>1260</b> | <b>801</b> | <b>311916</b> | <b>1803</b> | <b>6838</b> | <b>515</b> | <b>18870</b> | <b>342003</b> | <b>C</b>                                             | <b>C</b> | <b>C</b> | <b>C</b> | <b>C</b> | <b>C</b> | <b>C</b> | <b>C</b> | <b>C</b>          | <b>C</b> |
| A*25:01                                                 | 25:01               |          |                                               | 0           | 0          | 1429          | 0           | 4           | 0          | 50           | 1483          |                                                      |          | C        |          |          |          | I        | I        |                   | C        |
| A*25:01P                                                | 25:01P              |          |                                               | 0           | 0          | 232           | 0           | 0           | 0          | 0            | 232           |                                                      |          | I        |          |          |          |          | I        |                   | I        |



| Supplemental Table 8: HLA-A Allele Summary <sup>a</sup> |                        |          | Allele Count by Population Group <sup>b</sup> |             |            |               |             |             |            |              |               | 3.0.0 CIWD Category by Population Group <sup>c</sup> |          |          |          |          |          |          |          |                   |
|---------------------------------------------------------|------------------------|----------|-----------------------------------------------|-------------|------------|---------------|-------------|-------------|------------|--------------|---------------|------------------------------------------------------|----------|----------|----------|----------|----------|----------|----------|-------------------|
| Allele                                                  | Genomic Typing         | AlleleID | G group                                       | AFA         | API        | EURO          | MENA        | HIS         | NAM        | UNK          | Total         | AFA                                                  | API      | EURO     | MENA     | HIS      | NAM      | UNK      | Total    | Highest Frequency |
| <b>A*25:01:01G total</b>                                | <b>25:01:01G total</b> |          |                                               | <b>1260</b> | <b>801</b> | <b>310224</b> | <b>1803</b> | <b>6834</b> | <b>515</b> | <b>18820</b> | <b>340257</b> | <b>C</b>                                             | <b>C</b> | <b>C</b> | <b>C</b> | <b>C</b> | <b>C</b> | <b>C</b> | <b>C</b> | <b>C</b>          |
| A*25:01:01G                                             | 25:01:01G              |          | 25:01:01G                                     | 1003        | 762        | 298361        | 1761        | 4807        | 375        | 17185        | 324254        | C                                                    | C        | C        | C        | C        | C        | C        | C        | C                 |
| A*25:01:01                                              | 25:01:01               |          | 25:01:01G                                     | 251         | 36         | 11161         | 39          | 1925        | 137        | 1556         | 15105         | C                                                    | I        | C        | WD       | C        | C        | C        | C        | C                 |
| A*25:01:01:01                                           | 25:01:01:01            | HLA00071 | 25:01:01G                                     | 6           | 3          | 701           | 3           | 102         | 3          | 78           | 896           | WD                                                   |          | I        |          | C        |          | I        | I        | C                 |
| A*25:07                                                 | 25:07                  | HLA03523 | 25:01:01G                                     | 0           | 0          | 1             | 0           | 0           | 0          | 1            | 2             |                                                      |          |          |          |          |          |          |          |                   |
| A*25:01:02                                              | 25:01:02               | HLA01759 |                                               | 0           | 0          | 2             | 0           | 0           | 0          | 0            | 2             |                                                      |          |          |          |          |          |          |          |                   |
| A*25:01:03                                              | 25:01:03               | HLA05460 |                                               | 0           | 0          | 3             | 0           | 0           | 0          | 0            | 3             |                                                      |          |          |          |          |          |          |          |                   |
| A*25:01:04                                              | 25:01:04               | HLA05706 |                                               | 0           | 0          | 1             | 0           | 0           | 0          | 0            | 1             |                                                      |          |          |          |          |          |          |          |                   |
| A*25:01:06                                              | 25:01:06               | HLA07669 |                                               | 0           | 0          | 22            | 0           | 0           | 0          | 0            | 22            |                                                      |          | WD       |          |          |          |          | WD       | WD                |
| A*25:01:07                                              | 25:01:07               | HLA07609 |                                               | 0           | 0          | 2             | 0           | 0           | 0          | 0            | 2             |                                                      |          |          |          |          |          |          |          |                   |
| A*25:01:09                                              | 25:01:09               | HLA13223 |                                               | 0           | 0          | 1             | 0           | 0           | 0          | 0            | 1             |                                                      |          |          |          |          |          |          |          |                   |
| A*25:02                                                 | 25:02                  | HLA00072 |                                               | 2           | 0          | 126           | 0           | 0           | 1          | 13           | 142           |                                                      |          | I        |          |          |          | WD       | WD       | I                 |
| A*25:03                                                 | 25:03                  | HLA01043 |                                               | 0           | 0          | 116           | 1           | 0           | 0          | 2            | 119           |                                                      |          | WD       |          |          |          |          | WD       | WD                |
| A*25:04                                                 | 25:04                  | HLA01511 |                                               | 0           | 0          | 7             | 0           | 0           | 0          | 1            | 8             |                                                      |          | WD       |          |          |          |          | WD       | WD                |
| A*25:05                                                 | 25:05                  | HLA02607 |                                               | 0           | 0          | 3             | 0           | 0           | 0          | 1            | 4             |                                                      |          |          |          |          |          |          |          |                   |
| A*25:08                                                 | 25:08                  | HLA03565 |                                               | 0           | 0          | 6             | 0           | 0           | 0          | 2            | 8             |                                                      |          | WD       |          |          |          |          | WD       | WD                |
| A*25:09                                                 | 25:09                  | HLA03919 |                                               | 0           | 0          | 3             | 0           | 0           | 0          | 0            | 3             |                                                      |          |          |          |          |          |          |          |                   |
| A*25:10                                                 | 25:10                  | HLA04061 |                                               | 0           | 0          | 1             | 0           | 0           | 0          | 0            | 1             |                                                      |          |          |          |          |          |          |          |                   |
| A*25:11                                                 | 25:11                  | HLA04645 |                                               | 0           | 0          | 8             | 1           | 0           | 0          | 2            | 11            |                                                      |          | WD       |          |          |          |          | WD       | WD                |
| A*25:12N                                                | 25:12N                 | HLA04762 |                                               | 0           | 0          | 8             | 0           | 0           | 0          | 0            | 8             |                                                      |          | WD       |          |          |          |          | WD       | WD                |
| A*25:13                                                 | 25:13                  | HLA04793 |                                               | 0           | 0          | 4             | 0           | 1           | 0          | 0            | 5             |                                                      |          |          |          |          |          |          | WD       | WD                |
| A*25:14                                                 | 25:14                  | HLA05915 |                                               | 0           | 0          | 9             | 0           | 1           | 0          | 2            | 12            |                                                      |          | WD       |          |          |          |          | WD       | WD                |
| A*25:15                                                 | 25:15                  | HLA05943 |                                               | 0           | 0          | 1             | 0           | 0           | 0          | 1            | 2             |                                                      |          |          |          |          |          |          |          |                   |
| A*25:16                                                 | 25:16                  | HLA06190 |                                               | 0           | 0          | 10            | 0           | 0           | 0          | 0            | 10            |                                                      |          | WD       |          |          |          |          | WD       | WD                |
| A*25:17                                                 | 25:17                  | HLA08261 |                                               | 0           | 0          | 3             | 0           | 0           | 0          | 0            | 3             |                                                      |          |          |          |          |          |          |          |                   |
| A*25:22                                                 | 25:22                  | HLA08615 |                                               | 0           | 0          | 1             | 0           | 0           | 0          | 0            | 1             |                                                      |          |          |          |          |          |          |          |                   |
| A*25:24                                                 | 25:24                  | HLA10524 |                                               | 0           | 0          | 1             | 0           | 7           | 0          | 0            | 8             |                                                      |          |          |          | WD       |          |          | WD       | WD                |
| <b>A*25:27 total</b>                                    | <b>25:27 total</b>     |          |                                               | <b>0</b>    | <b>0</b>   | <b>1</b>      | <b>0</b>    | <b>0</b>    | <b>0</b>   | <b>0</b>     | <b>1</b>      |                                                      |          |          |          |          |          |          |          |                   |
| A*25:27:02                                              | 25:27:02               | HLA12472 |                                               | 0           | 0          | 1             | 0           | 0           | 0          | 0            | 1             |                                                      |          |          |          |          |          |          |          |                   |
| A*25:28                                                 | 25:28                  | HLA11787 |                                               | 0           | 0          | 3             | 0           | 0           | 0          | 0            | 3             |                                                      |          |          |          |          |          |          |          |                   |

| Supplemental Table 8: HLA-A Allele Summary <sup>a</sup> |                        |          | Allele Count by Population Group <sup>b</sup> |             |              |               |              |              |             |              |               | 3.0.0 CIWD Category by Population Group <sup>c</sup> |          |          |          |          |          |          |          |                   |          |
|---------------------------------------------------------|------------------------|----------|-----------------------------------------------|-------------|--------------|---------------|--------------|--------------|-------------|--------------|---------------|------------------------------------------------------|----------|----------|----------|----------|----------|----------|----------|-------------------|----------|
| Allele                                                  | Genomic Typing         | AlleleID | G group                                       | AFA         | API          | EURO          | MENA         | HIS          | NAM         | UNK          | Total         | AFA                                                  | API      | EURO     | MENA     | HIS      | NAM      | UNK      | Total    | Highest Frequency |          |
| A*25:32                                                 | 25:32                  | HLA13643 |                                               | 0           | 0            | 1             | 0            | 0            | 0           | 0            | 1             |                                                      |          |          |          |          |          |          |          |                   |          |
| A*25:39                                                 | 25:39                  | HLA15835 |                                               | 0           | 0            | 1             | 0            | 0            | 0           | 0            | 1             |                                                      |          |          |          |          |          |          |          |                   |          |
| A*25:CODE                                               | 25:CODE                |          |                                               | 104         | 42           | 22163         | 76           | 856          | 69          | 1582         | 24892         | NA                                                   | NA       | NA       | NA       | NA       | NA       | NA       | NA       | NA                | NA       |
| <b>A*26:01 total</b>                                    | <b>26:01 total</b>     |          |                                               | <b>4915</b> | <b>44894</b> | <b>400395</b> | <b>22233</b> | <b>17620</b> | <b>1537</b> | <b>48091</b> | <b>539685</b> | <b>C</b>                                             | <b>C</b> | <b>C</b> | <b>C</b> | <b>C</b> | <b>C</b> | <b>C</b> | <b>C</b> | <b>C</b>          | <b>C</b> |
| A*26:01                                                 | 26:01                  |          |                                               | 39          | 5            | 2544          | 14           | 33           | 7           | 228          | 2870          | C                                                    | WD       | C        | WD       | I        | C        | C        | C        | C                 | C        |
| A*26:01P                                                | 26:01P                 |          |                                               | 0           | 5            | 707           | 3            | 0            | 0           | 7            | 722           |                                                      | WD       | I        |          |          |          | WD       | I        | I                 | I        |
| <b>A*26:01:01G total</b>                                | <b>26:01:01G total</b> |          |                                               | <b>4746</b> | <b>44844</b> | <b>397109</b> | <b>22197</b> | <b>17573</b> | <b>1527</b> | <b>47824</b> | <b>535820</b> | <b>C</b>                                             | <b>C</b> | <b>C</b> | <b>C</b> | <b>C</b> | <b>C</b> | <b>C</b> | <b>C</b> | <b>C</b>          | <b>C</b> |
| A*26:01:01G                                             | 26:01:01G              |          | 26:01:01G                                     | 3663        | 40763        | 379447        | 21590        | 12419        | 1061        | 44317        | 503260        | C                                                    | C        | C        | C        | C        | C        | C        | C        | C                 | C        |
| A*26:01:01                                              | 26:01:01               |          | 26:01:01G                                     | 820         | 2641         | 10789         | 445          | 3587         | 284         | 2480         | 21046         | C                                                    | C        | C        | C        | C        | C        | C        | C        | C                 | C        |
| A*26:01:01:01                                           | 26:01:01:01            | HLA00073 | 26:01:01G                                     | 254         | 1243         | 6679          | 156          | 1538         | 180         | 997          | 11047         | C                                                    | C        | C        | C        | C        | C        | C        | C        | C                 | C        |
| A*26:01:01:02                                           | 26:01:01:02            | HLA13482 | 26:01:01G                                     | 4           | 196          | 123           | 6            | 22           | 1           | 22           | 374           |                                                      | C        | I        | WD       | I        |          | I        | I        | I                 | C        |
| A*26:01:01:05                                           | 26:01:01:05            | HLA16433 | 26:01:01G                                     | 0           | 0            | 10            | 0            | 0            | 0           | 2            | 12            |                                                      |          | WD       |          |          |          |          | WD       | WD                | WD       |
| A*26:01:01:06                                           | 26:01:01:06            | HLA16667 | 26:01:01G                                     | 0           | 0            | 9             | 0            | 0            | 0           | 1            | 10            |                                                      |          | WD       |          |          |          |          | WD       | WD                | WD       |
| A*26:01:01:07                                           | 26:01:01:07            | HLA16668 | 26:01:01G                                     | 0           | 0            | 2             | 0            | 0            | 0           | 0            | 2             |                                                      |          |          |          |          |          |          |          |                   |          |
| A*26:01:01:08                                           | 26:01:01:08            | HLA16669 | 26:01:01G                                     | 1           | 0            | 14            | 0            | 0            | 1           | 0            | 16            |                                                      |          | WD       |          |          |          |          | WD       | WD                | WD       |
| A*26:01:07                                              | 26:01:07               | HLA03583 | 26:01:01G                                     | 4           | 0            | 0             | 0            | 0            | 0           | 0            | 4             |                                                      |          |          |          |          |          |          |          |                   |          |
| A*26:01:32                                              | 26:01:32               | HLA11083 | 26:01:01G                                     | 0           | 1            | 0             | 0            | 0            | 0           | 0            | 1             |                                                      |          |          |          |          |          |          |          |                   |          |
| A*26:01:40                                              | 26:01:40               | HLA15570 | 26:01:01G                                     | 0           | 0            | 35            | 0            | 3            | 0           | 4            | 42            |                                                      |          | WD       |          |          |          |          | WD       | WD                | WD       |
| A*26:26                                                 | 26:26                  | HLA02159 | 26:01:01G                                     | 0           | 0            | 1             | 0            | 4            | 0           | 0            | 5             |                                                      |          |          |          |          |          |          | WD       | WD                | WD       |
| A*26:99                                                 | 26:99                  | HLA10869 | 26:01:01G                                     | 0           | 0            | 0             | 0            | 0            | 0           | 1            | 1             |                                                      |          |          |          |          |          |          |          |                   |          |
| A*26:01:02                                              | 26:01:02               | HLA02177 |                                               | 0           | 15           | 2             | 1            | 0            | 0           | 1            | 19            |                                                      | I        |          |          |          |          |          | WD       | I                 | I        |
| A*26:01:03                                              | 26:01:03               | HLA02180 |                                               | 1           | 4            | 2             | 0            | 0            | 0           | 0            | 7             |                                                      |          |          |          |          |          |          | WD       | WD                | WD       |
| A*26:01:04                                              | 26:01:04               | HLA02255 |                                               | 128         | 0            | 7             | 6            | 2            | 0           | 22           | 165           | C                                                    |          | WD       | WD       |          |          | I        | I        | I                 | C        |
| A*26:01:05                                              | 26:01:05               | HLA02828 |                                               | 0           | 0            | 2             | 0            | 0            | 0           | 0            | 2             |                                                      |          |          |          |          |          |          |          |                   |          |
| A*26:01:06                                              | 26:01:06               | HLA03230 |                                               | 0           | 18           | 0             | 0            | 0            | 0           | 0            | 18            |                                                      | I        |          |          |          |          |          | WD       | I                 | I        |
| A*26:01:09                                              | 26:01:09               | HLA03876 |                                               | 0           | 0            | 1             | 0            | 0            | 0           | 0            | 1             |                                                      |          |          |          |          |          |          |          |                   |          |
| A*26:01:11                                              | 26:01:11               | HLA03891 |                                               | 0           | 0            | 4             | 0            | 0            | 0           | 1            | 5             |                                                      |          |          |          |          |          |          | WD       | WD                | WD       |
| A*26:01:12                                              | 26:01:12               | HLA04144 |                                               | 0           | 0            | 0             | 0            | 0            | 0           | 1            | 1             |                                                      |          |          |          |          |          |          |          |                   |          |
| A*26:01:15                                              | 26:01:15               | HLA05315 |                                               | 0           | 0            | 1             | 1            | 0            | 0           | 0            | 2             |                                                      |          |          |          |          |          |          |          |                   |          |
| A*26:01:16                                              | 26:01:16               | HLA05339 |                                               | 0           | 0            | 1             | 0            | 0            | 0           | 0            | 1             |                                                      |          |          |          |          |          |          |          |                   |          |

| Supplemental Table 8: HLA-A Allele Summary <sup>a</sup> |                    |          | Allele Count by Population Group <sup>b</sup> |          |             |           |          |           |          |            |             | 3.0.0 CIWD Category by Population Group <sup>c</sup> |          |           |      |          |     |           |          |                   |
|---------------------------------------------------------|--------------------|----------|-----------------------------------------------|----------|-------------|-----------|----------|-----------|----------|------------|-------------|------------------------------------------------------|----------|-----------|------|----------|-----|-----------|----------|-------------------|
| Allele                                                  | Genomic Typing     | AlleleID | G group                                       | AFA      | API         | EURO      | MENA     | HIS       | NAM      | UNK        | Total       | AFA                                                  | API      | EURO      | MENA | HIS      | NAM | UNK       | Total    | Highest Frequency |
| A*26:01:17                                              | 26:01:17           | HLA05448 |                                               | 0        | 0           | 5         | 4        | 0         | 0        | 0          | 9           |                                                      |          | WD        |      |          |     |           | WD       | WD                |
| A*26:01:18                                              | 26:01:18           | HLA05657 |                                               | 0        | 0           | 1         | 0        | 0         | 0        | 0          | 1           |                                                      |          |           |      |          |     |           |          |                   |
| A*26:01:19                                              | 26:01:19           | HLA05941 |                                               | 0        | 0           | 0         | 3        | 0         | 0        | 0          | 3           |                                                      |          |           |      |          |     |           |          |                   |
| A*26:01:20                                              | 26:01:20           | HLA05944 |                                               | 1        | 0           | 4         | 0        | 0         | 0        | 0          | 5           |                                                      |          |           |      |          |     |           | WD       | WD                |
| A*26:01:21                                              | 26:01:21           | HLA06021 |                                               | 0        | 0           | 3         | 0        | 0         | 0        | 1          | 4           |                                                      |          |           |      |          |     |           |          |                   |
| A*26:01:23                                              | 26:01:23           | HLA07583 |                                               | 0        | 1           | 1         | 0        | 12        | 3        | 5          | 22          |                                                      |          |           |      | I        |     | WD        | WD       | I                 |
| A*26:01:24                                              | 26:01:24           | HLA07584 |                                               | 0        | 0           | 1         | 0        | 0         | 0        | 0          | 1           |                                                      |          |           |      |          |     |           |          |                   |
| A*26:01:27                                              | 26:01:27           | HLA08613 |                                               | 0        | 0           | 0         | 0        | 0         | 0        | 1          | 1           |                                                      |          |           |      |          |     |           |          |                   |
| A*26:01:33                                              | 26:01:33           | HLA11300 |                                               | 0        | 2           | 0         | 0        | 0         | 0        | 0          | 2           |                                                      |          |           |      |          |     |           |          |                   |
| A*26:01:37                                              | 26:01:37           | HLA12456 |                                               | 0        | 0           | 0         | 4        | 0         | 0        | 0          | 4           |                                                      |          |           |      |          |     |           |          |                   |
| <b>A*26:02 total</b>                                    | <b>26:02 total</b> |          |                                               | <b>5</b> | <b>1077</b> | <b>36</b> | <b>0</b> | <b>7</b>  | <b>0</b> | <b>334</b> | <b>1459</b> | <b>WD</b>                                            | <b>C</b> | <b>WD</b> |      | <b>D</b> |     | <b>C</b>  | <b>I</b> | <b>C</b>          |
| A*26:02                                                 | 26:02              |          |                                               | 2        | 305         | 5         | 0        | 3         | 0        | 85         | 400         |                                                      | C        | WD        |      |          |     | I         | I        | C                 |
| A*26:02:01                                              | 26:02:01           | HLA00074 |                                               | 3        | 772         | 31        | 0        | 4         | 0        | 249        | 1059        |                                                      | C        | WD        |      |          |     | C         | I        | C                 |
| <b>A*26:03 total</b>                                    | <b>26:03 total</b> |          |                                               | <b>1</b> | <b>631</b>  | <b>41</b> | <b>1</b> | <b>2</b>  | <b>1</b> | <b>300</b> | <b>977</b>  |                                                      | <b>C</b> | <b>WD</b> |      |          |     | <b>C</b>  | <b>I</b> | <b>C</b>          |
| A*26:03                                                 | 26:03              |          |                                               | 0        | 55          | 3         | 0        | 0         | 0        | 15         | 73          |                                                      | I        |           |      |          |     | I         | WD       | I                 |
| A*26:03:01                                              | 26:03:01           | HLA00075 |                                               | 1        | 576         | 38        | 1        | 2         | 1        | 285        | 904         |                                                      | C        | WD        |      |          |     | C         | I        | C                 |
| A*26:05                                                 | 26:05              | HLA00077 |                                               | 0        | 9           | 0         | 0        | 0         | 0        | 6          | 15          |                                                      | WD       |           |      |          |     | WD        | WD       | WD                |
| A*26:06                                                 | 26:06              | HLA00078 |                                               | 0        | 1           | 0         | 0        | 0         | 0        | 5          | 6           |                                                      |          |           |      |          |     | WD        | WD       | WD                |
| <b>A*26:07 total</b>                                    | <b>26:07 total</b> |          |                                               | <b>1</b> | <b>97</b>   | <b>40</b> | <b>1</b> | <b>12</b> | <b>0</b> | <b>10</b>  | <b>161</b>  |                                                      | <b>I</b> | <b>WD</b> |      | <b>I</b> |     | <b>WD</b> | <b>I</b> | <b>I</b>          |
| A*26:07                                                 | 26:07              |          |                                               | 0        | 0           | 6         | 0        | 3         | 0        | 2          | 11          |                                                      |          | WD        |      |          |     |           | WD       | WD                |
| A*26:07:01                                              | 26:07:01           | HLA00079 |                                               | 0        | 97          | 2         | 1        | 0         | 0        | 1          | 101         |                                                      | I        |           |      |          |     |           | WD       | I                 |
| A*26:07:02                                              | 26:07:02           | HLA01805 |                                               | 1        | 0           | 32        | 0        | 9         | 0        | 7          | 49          |                                                      |          | WD        |      | I        |     | WD        | WD       | I                 |
| A*26:08                                                 | 26:08              | HLA00080 |                                               | 93       | 30          | 9465      | 49       | 669       | 38       | 1106       | 11450       | C                                                    | I        | C         | C    | C        | C   | C         | C        | C                 |
| A*26:09                                                 | 26:09              | HLA00081 |                                               | 2        | 2           | 316       | 7        | 1         | 1        | 15         | 344         |                                                      |          | I         | WD   |          |     | I         | I        | I                 |
| A*26:10                                                 | 26:10              | HLA00082 |                                               | 0        | 8           | 0         | 0        | 1         | 0        | 1          | 10          |                                                      | WD       |           |      |          |     |           | WD       | WD                |
| A*26:12                                                 | 26:12              | HLA00084 |                                               | 185      | 0           | 49        | 22       | 8         | 3        | 44         | 311         | C                                                    |          | WD        | WD   | I        |     | I         | I        | C                 |
| A*26:13                                                 | 26:13              | HLA01044 |                                               | 0        | 1           | 63        | 0        | 0         | 0        | 3          | 67          |                                                      |          | WD        |      |          |     |           | WD       | WD                |
| A*26:14                                                 | 26:14              | HLA01120 |                                               | 0        | 38          | 20        | 0        | 0         | 0        | 0          | 58          |                                                      | I        | WD        |      |          |     |           | WD       | I                 |
| A*26:15                                                 | 26:15              | HLA01272 |                                               | 1        | 2           | 398       | 2        | 3         | 0        | 36         | 442         |                                                      |          | I         |      |          |     | I         | I        | I                 |
| A*26:16                                                 | 26:16              | HLA01347 |                                               | 0        | 1           | 25        | 22       | 3         | 0        | 1          | 52          |                                                      |          | WD        | WD   |          |     |           | WD       | WD                |

| Supplemental Table 8: HLA-A Allele Summary <sup>a</sup> |                    |          | Allele Count by Population Group <sup>b</sup> |          |          |          |          |          |          |          |          | 3.0.0 CIWD Category by Population Group <sup>c</sup> |     |      |      |     |     |     |       |                   |  |
|---------------------------------------------------------|--------------------|----------|-----------------------------------------------|----------|----------|----------|----------|----------|----------|----------|----------|------------------------------------------------------|-----|------|------|-----|-----|-----|-------|-------------------|--|
| Allele                                                  | Genomic Typing     | AlleleID | G group                                       | AFA      | API      | EURO     | MENA     | HIS      | NAM      | UNK      | Total    | AFA                                                  | API | EURO | MENA | HIS | NAM | UNK | Total | Highest Frequency |  |
| A*26:17                                                 | 26:17              | HLA01351 |                                               | 1        | 58       | 84       | 125      | 17       | 1        | 40       | 326      |                                                      | I   | WD   | C    | I   |     | I   | I     | C                 |  |
| A*26:18                                                 | 26:18              | HLA01525 |                                               | 0        | 17       | 1        | 3        | 0        | 0        | 0        | 21       |                                                      | I   |      |      |     |     |     | WD    | I                 |  |
| A*26:20                                                 | 26:20              | HLA01876 |                                               | 0        | 3        | 1        | 0        | 0        | 0        | 1        | 5        |                                                      |     |      |      |     |     |     | WD    | WD                |  |
| A*26:27                                                 | 26:27              | HLA02367 |                                               | 0        | 1        | 7        | 0        | 8        | 0        | 1        | 17       |                                                      |     | WD   |      | I   |     |     | WD    | I                 |  |
| A*26:28                                                 | 26:28              | HLA02471 |                                               | 0        | 0        | 1        | 0        | 0        | 0        | 0        | 1        |                                                      |     |      |      |     |     |     |       |                   |  |
| A*26:30                                                 | 26:30              | HLA02543 |                                               | 6        | 2        | 0        | 0        | 0        | 0        | 3        | 11       | WD                                                   |     |      |      |     |     |     | WD    | WD                |  |
| A*26:31                                                 | 26:31              | HLA02581 |                                               | 0        | 0        | 13       | 0        | 0        | 0        | 2        | 15       |                                                      |     | WD   |      |     |     |     | WD    | WD                |  |
| A*26:34                                                 | 26:34              | HLA02731 |                                               | 0        | 1        | 0        | 0        | 0        | 0        | 0        | 1        |                                                      |     |      |      |     |     |     |       |                   |  |
| A*26:35                                                 | 26:35              | HLA02939 |                                               | 0        | 2        | 0        | 0        | 0        | 0        | 0        | 2        |                                                      |     |      |      |     |     |     |       |                   |  |
| A*26:36                                                 | 26:36              | HLA03297 |                                               | 0        | 2        | 0        | 0        | 0        | 0        | 0        | 2        |                                                      |     |      |      |     |     |     |       |                   |  |
| A*26:37                                                 | 26:37              | HLA03329 |                                               | 0        | 0        | 6        | 0        | 0        | 0        | 0        | 6        |                                                      |     | WD   |      |     |     |     | WD    | WD                |  |
| A*26:38                                                 | 26:38              | HLA03689 |                                               | 0        | 0        | 10       | 1        | 0        | 0        | 1        | 12       |                                                      |     | WD   |      |     |     |     | WD    | WD                |  |
| A*26:39                                                 | 26:39              | HLA03793 |                                               | 0        | 0        | 50       | 0        | 0        | 0        | 1        | 51       |                                                      |     | WD   |      |     |     |     | WD    | WD                |  |
| A*26:41                                                 | 26:41              | HLA04143 |                                               | 0        | 0        | 0        | 0        | 2        | 0        | 0        | 2        |                                                      |     |      |      |     |     |     |       |                   |  |
| A*26:42                                                 | 26:42              | HLA04523 |                                               | 4        | 0        | 1        | 0        | 0        | 0        | 0        | 5        |                                                      |     |      |      |     |     |     | WD    | WD                |  |
| <b>A*26:43 total</b>                                    | <b>26:43 total</b> |          |                                               | <b>0</b> | <b>0</b> | <b>1</b> | <b>0</b> | <b>0</b> | <b>0</b> | <b>0</b> | <b>1</b> |                                                      |     |      |      |     |     |     |       |                   |  |
| A*26:43:01                                              | 26:43:01           | HLA04726 |                                               | 0        | 0        | 1        | 0        | 0        | 0        | 0        | 1        |                                                      |     |      |      |     |     |     |       |                   |  |
| A*26:45                                                 | 26:45              | HLA04785 |                                               | 0        | 0        | 36       | 0        | 0        | 0        | 0        | 36       |                                                      |     | WD   |      |     |     |     | WD    | WD                |  |
| A*26:47                                                 | 26:47              | HLA05312 |                                               | 0        | 0        | 8        | 0        | 0        | 0        | 0        | 8        |                                                      |     | WD   |      |     |     |     | WD    | WD                |  |
| A*26:49                                                 | 26:49              | HLA05341 |                                               | 0        | 0        | 6        | 0        | 0        | 0        | 1        | 7        |                                                      |     | WD   |      |     |     |     | WD    | WD                |  |
| A*26:50                                                 | 26:50              | HLA05407 |                                               | 0        | 3        | 0        | 0        | 0        | 0        | 0        | 3        |                                                      |     |      |      |     |     |     |       |                   |  |
| A*26:52                                                 | 26:52              | HLA05649 |                                               | 0        | 3        | 2        | 0        | 0        | 0        | 1        | 6        |                                                      |     |      |      |     |     |     | WD    | WD                |  |
| A*26:54                                                 | 26:54              | HLA05708 |                                               | 0        | 0        | 2        | 0        | 0        | 0        | 0        | 2        |                                                      |     |      |      |     |     |     |       |                   |  |
| A*26:55                                                 | 26:55              | HLA05709 |                                               | 0        | 0        | 1        | 0        | 0        | 0        | 0        | 1        |                                                      |     |      |      |     |     |     |       |                   |  |
| A*26:59                                                 | 26:59              | HLA06018 |                                               | 0        | 0        | 4        | 0        | 1        | 0        | 0        | 5        |                                                      |     |      |      |     |     |     | WD    | WD                |  |
| A*26:62                                                 | 26:62              | HLA06205 |                                               | 0        | 0        | 5        | 0        | 0        | 0        | 0        | 5        |                                                      |     | WD   |      |     |     |     | WD    | WD                |  |
| A*26:63                                                 | 26:63              | HLA06209 |                                               | 0        | 37       | 0        | 0        | 0        | 0        | 0        | 37       |                                                      | I   |      |      |     |     |     | WD    | I                 |  |
| A*26:65                                                 | 26:65              | HLA06283 |                                               | 0        | 3        | 5        | 0        | 0        | 0        | 0        | 8        |                                                      |     | WD   |      |     |     |     | WD    | WD                |  |
| A*26:68                                                 | 26:68              | HLA06554 |                                               | 0        | 0        | 1        | 0        | 0        | 0        | 0        | 1        |                                                      |     |      |      |     |     |     |       |                   |  |
| A*26:71N                                                | 26:71N             | HLA07393 |                                               | 0        | 0        | 1        | 0        | 0        | 0        | 0        | 1        |                                                      |     |      |      |     |     |     |       |                   |  |

| Supplemental Table 8: HLA-A Allele Summary <sup>a</sup> |                        |          | Allele Count by Population Group <sup>b</sup> |            |              |              |             |             |            |             |              | 3.0.0 CIWD Category by Population Group <sup>c</sup> |          |          |          |          |          |          |          |                   |
|---------------------------------------------------------|------------------------|----------|-----------------------------------------------|------------|--------------|--------------|-------------|-------------|------------|-------------|--------------|------------------------------------------------------|----------|----------|----------|----------|----------|----------|----------|-------------------|
| Allele                                                  | Genomic Typing         | AlleleID | G group                                       | AFA        | API          | EURO         | MENA        | HIS         | NAM        | UNK         | Total        | AFA                                                  | API      | EURO     | MENA     | HIS      | NAM      | UNK      | Total    | Highest Frequency |
| A*26:75                                                 | 26:75                  | HLA08023 |                                               | 0          | 0            | 16           | 0           | 0           | 0          | 0           | 16           |                                                      |          | WD       |          |          |          |          | WD       | WD                |
| A*26:76                                                 | 26:76                  | HLA08028 |                                               | 0          | 20           | 0            | 0           | 0           | 0          | 0           | 20           |                                                      | I        |          |          |          |          |          | WD       | I                 |
| A*26:77                                                 | 26:77                  | HLA08256 |                                               | 0          | 0            | 2            | 0           | 0           | 0          | 0           | 2            |                                                      |          |          |          |          |          |          |          |                   |
| A*26:80                                                 | 26:80                  | HLA08607 |                                               | 0          | 0            | 2            | 0           | 0           | 0          | 0           | 2            |                                                      |          |          |          |          |          |          |          |                   |
| A*26:83                                                 | 26:83                  | HLA08946 |                                               | 0          | 2            | 0            | 0           | 0           | 0          | 0           | 2            |                                                      |          |          |          |          |          |          |          |                   |
| A*26:86                                                 | 26:86                  | HLA09479 |                                               | 0          | 0            | 0            | 0           | 1           | 0          | 0           | 1            |                                                      |          |          |          |          |          |          |          |                   |
| A*26:87                                                 | 26:87                  | HLA09490 |                                               | 0          | 1            | 0            | 0           | 0           | 0          | 0           | 1            |                                                      |          |          |          |          |          |          |          |                   |
| A*26:90                                                 | 26:90                  | HLA09510 |                                               | 0          | 1            | 1            | 0           | 0           | 0          | 1           | 3            |                                                      |          |          |          |          |          |          |          |                   |
| A*26:92                                                 | 26:92                  | HLA09568 |                                               | 0          | 0            | 1            | 0           | 0           | 0          | 0           | 1            |                                                      |          |          |          |          |          |          |          |                   |
| A*26:94                                                 | 26:94                  | HLA09807 |                                               | 0          | 0            | 2            | 0           | 0           | 0          | 0           | 2            |                                                      |          |          |          |          |          |          |          |                   |
| A*26:95                                                 | 26:95                  | HLA10379 |                                               | 0          | 0            | 1            | 0           | 0           | 0          | 0           | 1            |                                                      |          |          |          |          |          |          |          |                   |
| A*26:100                                                | 26:100                 | HLA11299 |                                               | 0          | 0            | 2            | 0           | 0           | 0          | 0           | 2            |                                                      |          |          |          |          |          |          |          |                   |
| A*26:103                                                | 26:103                 | HLA11987 |                                               | 0          | 0            | 1            | 0           | 0           | 0          | 0           | 1            |                                                      |          |          |          |          |          |          |          |                   |
| A*26:104                                                | 26:104                 | HLA12073 |                                               | 0          | 0            | 5            | 0           | 0           | 0          | 0           | 5            |                                                      |          | WD       |          |          |          |          | WD       | WD                |
| A*26:105                                                | 26:105                 | HLA12123 |                                               | 0          | 1            | 0            | 0           | 0           | 0          | 0           | 1            |                                                      |          |          |          |          |          |          |          |                   |
| A*26:109                                                | 26:109                 | HLA12880 |                                               | 0          | 0            | 0            | 1           | 0           | 0          | 0           | 1            |                                                      |          |          |          |          |          |          |          |                   |
| A*26:115                                                | 26:115                 | HLA13618 |                                               | 0          | 0            | 1            | 0           | 0           | 0          | 0           | 1            |                                                      |          |          |          |          |          |          |          |                   |
| A*26:116                                                | 26:116                 | HLA13724 |                                               | 0          | 2            | 0            | 0           | 0           | 0          | 0           | 2            |                                                      |          |          |          |          |          |          |          |                   |
| A*26:122                                                | 26:122                 | HLA14905 |                                               | 0          | 3            | 0            | 0           | 0           | 0          | 0           | 3            |                                                      |          |          |          |          |          |          |          |                   |
| A*26:130                                                | 26:130                 | HLA15852 |                                               | 0          | 0            | 1            | 0           | 0           | 0          | 0           | 1            |                                                      |          |          |          |          |          |          |          |                   |
| A*26:135                                                | 26:135                 | HLA16086 |                                               | 0          | 0            | 1            | 0           | 0           | 0          | 0           | 1            |                                                      |          |          |          |          |          |          |          |                   |
| A*26:137                                                | 26:137                 | HLA16106 |                                               | 0          | 0            | 1            | 0           | 0           | 0          | 0           | 1            |                                                      |          |          |          |          |          |          |          |                   |
| A*26:149                                                | 26:149                 | HLA17993 |                                               | 0          | 0            | 1            | 0           | 0           | 0          | 0           | 1            |                                                      |          |          |          |          |          |          |          |                   |
| A*26:CODE                                               | 26:CODE                |          |                                               | 400        | 1259         | 27933        | 830         | 2036        | 149        | 4313        | 36920        | NA                                                   | NA       | NA       | NA       | NA       | NA       | NA       | NA       | NA                |
| <b>A*29:01 total</b>                                    | <b>29:01 total</b>     |          |                                               | <b>524</b> | <b>17101</b> | <b>33442</b> | <b>5539</b> | <b>1710</b> | <b>110</b> | <b>8005</b> | <b>66431</b> | <b>C</b>                                             | <b>C</b> | <b>C</b> | <b>C</b> | <b>C</b> | <b>C</b> | <b>C</b> | <b>C</b> | <b>C</b>          |
| A*29:01                                                 | 29:01                  |          |                                               | 10         | 25           | 688          | 70          | 12          | 0          | 740         | 1545         | WD                                                   | I        | I        | C        | I        |          | C        | I        | C                 |
| A*29:01P                                                | 29:01P                 |          |                                               | 0          | 0            | 28           | 1           | 0           | 0          | 0           | 29           |                                                      |          | WD       |          |          |          |          | WD       | WD                |
| <b>A*29:01:01G total</b>                                | <b>29:01:01G total</b> |          |                                               | <b>514</b> | <b>17074</b> | <b>32726</b> | <b>5468</b> | <b>1698</b> | <b>110</b> | <b>7265</b> | <b>64855</b> | <b>C</b>                                             | <b>C</b> | <b>C</b> | <b>C</b> | <b>C</b> | <b>C</b> | <b>C</b> | <b>C</b> | <b>C</b>          |
| A*29:01:01G                                             | 29:01:01G              |          | 29:01:01G                                     | 469        | 15766        | 31231        | 5285        | 1290        | 86         | 7001        | 61128        | C                                                    | C        | C        | C        | C        | C        | C        | C        | C                 |
| A*29:01:01                                              | 29:01:01               |          | 29:01:01G                                     | 1          | 25           | 54           | 3           | 5           | 1          | 10          | 99           |                                                      | I        | WD       |          | WD       |          | WD       | WD       | I                 |

| Supplemental Table 8: HLA-A Allele Summary <sup>a</sup> |                        |          | Allele Count by Population Group <sup>b</sup> |              |             |               |             |              |             |              |               | 3.0.0 CIWD Category by Population Group <sup>c</sup> |          |          |          |          |          |          |          |                   |          |
|---------------------------------------------------------|------------------------|----------|-----------------------------------------------|--------------|-------------|---------------|-------------|--------------|-------------|--------------|---------------|------------------------------------------------------|----------|----------|----------|----------|----------|----------|----------|-------------------|----------|
| Allele                                                  | Genomic Typing         | AlleleID | G group                                       | AFA          | API         | EURO          | MENA        | HIS          | NAM         | UNK          | Total         | AFA                                                  | API      | EURO     | MENA     | HIS      | NAM      | UNK      | Total    | Highest Frequency |          |
| A*29:01:01:01                                           | 29:01:01:01            | HLA00085 | 29:01:01G                                     | 44           | 1283        | 1441          | 180         | 403          | 23          | 254          | 3628          | C                                                    | C        | C        | C        | C        | C        | C        | C        | C                 | C        |
| A*29:01:06                                              | 29:01:06               | HLA10957 |                                               | 0            | 2           | 0             | 0           | 0            | 0           | 0            | 2             |                                                      |          |          |          |          |          |          |          |                   |          |
| <b>A*29:02 total</b>                                    | <b>29:02 total</b>     |          |                                               | <b>10838</b> | <b>1506</b> | <b>269494</b> | <b>3967</b> | <b>26363</b> | <b>2460</b> | <b>34115</b> | <b>348743</b> | <b>C</b>                                             | <b>C</b> | <b>C</b> | <b>C</b> | <b>C</b> | <b>C</b> | <b>C</b> | <b>C</b> | <b>C</b>          | <b>C</b> |
| A*29:02                                                 | 29:02                  |          |                                               | 5            | 0           | 1271          | 5           | 56           | 1           | 65           | 1403          | WD                                                   |          | C        | WD       | I        |          | I        | I        | I                 | C        |
| A*29:02P                                                | 29:02P                 |          |                                               | 2            | 1           | 425           | 1           | 5            | 0           | 0            | 434           |                                                      |          | I        |          | WD       |          |          | I        | I                 | I        |
| <b>A*29:02:01G total</b>                                | <b>29:02:01G total</b> |          |                                               | <b>10830</b> | <b>1499</b> | <b>267569</b> | <b>3958</b> | <b>26120</b> | <b>2448</b> | <b>33969</b> | <b>346393</b> | <b>C</b>                                             | <b>C</b> | <b>C</b> | <b>C</b> | <b>C</b> | <b>C</b> | <b>C</b> | <b>C</b> | <b>C</b>          | <b>C</b> |
| A*29:02:01G                                             | 29:02:01G              |          | 29:02:01G                                     | 8230         | 1265        | 244630        | 3781        | 18310        | 1684        | 29648        | 307548        | C                                                    | C        | C        | C        | C        | C        | C        | C        | C                 | C        |
| A*29:02:01                                              | 29:02:01               |          | 29:02:01G                                     | 1055         | 117         | 10973         | 88          | 3203         | 268         | 2156         | 17860         | C                                                    | I        | C        | C        | C        | C        | C        | C        | C                 | C        |
| A*29:02:01:01                                           | 29:02:01:01            | HLA00086 | 29:02:01G                                     | 1110         | 103         | 11034         | 74          | 4127         | 433         | 1913         | 18794         | C                                                    | I        | C        | C        | C        | C        | C        | C        | C                 | C        |
| A*29:02:01:02                                           | 29:02:01:02            | HLA05528 | 29:02:01G                                     | 390          | 13          | 879           | 13          | 382          | 49          | 228          | 1954          | C                                                    | I        | I        | WD       | C        | C        | C        | C        | C                 | C        |
| A*29:02:01:03                                           | 29:02:01:03            | HLA14084 | 29:02:01G                                     | 42           | 1           | 14            | 1           | 44           | 7           | 16           | 125           | C                                                    |          | WD       |          | I        | C        | I        | WD       | WD                | C        |
| A*29:02:01:04                                           | 29:02:01:04            | HLA16671 | 29:02:01G                                     | 1            | 0           | 5             | 0           | 50           | 4           | 5            | 65            |                                                      |          | WD       |          | I        |          | WD       | WD       | WD                | I        |
| A*29:02:07                                              | 29:02:07               | HLA05902 | 29:02:01G                                     | 1            | 0           | 0             | 0           | 0            | 0           | 0            | 1             |                                                      |          |          |          |          |          |          |          |                   |          |
| A*29:02:20                                              | 29:02:20               | HLA17072 | 29:02:01G                                     | 0            | 0           | 6             | 1           | 3            | 1           | 0            | 11            |                                                      |          | WD       |          |          |          |          | WD       | WD                | WD       |
| A*29:26                                                 | 29:26                  | HLA05903 | 29:02:01G                                     | 1            | 0           | 4             | 0           | 0            | 1           | 0            | 6             |                                                      |          |          |          |          |          |          | WD       | WD                | WD       |
| A*29:46                                                 | 29:46                  | HLA08600 | 29:02:01G                                     | 0            | 0           | 4             | 0           | 0            | 1           | 2            | 7             |                                                      |          |          |          |          |          |          | WD       | WD                | WD       |
| A*29:95                                                 | 29:95                  | HLA16057 | 29:02:01G                                     | 0            | 0           | 20            | 0           | 1            | 0           | 1            | 22            |                                                      |          | WD       |          |          |          |          | WD       | WD                | WD       |
| A*29:02:02                                              | 29:02:02               | HLA01703 |                                               | 0            | 0           | 119           | 0           | 3            | 1           | 3            | 126           |                                                      |          | WD       |          |          |          |          | WD       | WD                | WD       |
| A*29:02:03                                              | 29:02:03               | HLA01887 |                                               | 1            | 6           | 67            | 3           | 178          | 10          | 65           | 330           |                                                      | WD       | WD       |          | C        | C        | I        | I        | I                 | C        |
| A*29:02:04                                              | 29:02:04               | HLA03923 |                                               | 0            | 0           | 14            | 0           | 0            | 0           | 0            | 14            |                                                      |          | WD       |          |          |          |          | WD       | WD                | WD       |
| A*29:02:06                                              | 29:02:06               | HLA05451 |                                               | 0            | 0           | 8             | 0           | 0            | 0           | 8            | 16            |                                                      |          | WD       |          |          |          | WD       | WD       | WD                | WD       |
| A*29:02:08                                              | 29:02:08               | HLA05977 |                                               | 0            | 0           | 4             | 0           | 0            | 0           | 0            | 4             |                                                      |          |          |          |          |          |          |          |                   |          |
| A*29:02:09                                              | 29:02:09               | HLA06795 |                                               | 0            | 0           | 8             | 0           | 0            | 0           | 5            | 13            |                                                      |          | WD       |          |          |          | WD       | WD       | WD                | WD       |
| A*29:02:11                                              | 29:02:11               | HLA07570 |                                               | 0            | 0           | 1             | 0           | 0            | 0           | 0            | 1             |                                                      |          |          |          |          |          |          |          |                   |          |
| A*29:02:12                                              | 29:02:12               | HLA08249 |                                               | 0            | 0           | 7             | 0           | 0            | 0           | 0            | 7             |                                                      |          | WD       |          |          |          |          | WD       | WD                | WD       |
| A*29:02:14                                              | 29:02:14               | HLA10272 |                                               | 0            | 0           | 1             | 0           | 0            | 0           | 0            | 1             |                                                      |          |          |          |          |          |          |          |                   |          |
| A*29:02:15                                              | 29:02:15               | HLA12619 |                                               | 0            | 0           | 0             | 0           | 1            | 0           | 0            | 1             |                                                      |          |          |          |          |          |          |          |                   |          |
| A*29:03                                                 | 29:03                  | HLA00087 |                                               | 0            | 0           | 17            | 1           | 0            | 0           | 0            | 18            |                                                      |          | WD       |          |          |          |          | WD       | WD                | WD       |
| A*29:04                                                 | 29:04                  | HLA00088 |                                               | 0            | 0           | 50            | 0           | 1            | 0           | 9            | 60            |                                                      |          | WD       |          |          |          | WD       | WD       | WD                | WD       |
| A*29:06                                                 | 29:06                  | HLA01558 |                                               | 0            | 0           | 1             | 0           | 0            | 0           | 0            | 1             |                                                      |          |          |          |          |          |          |          |                   |          |

| Supplemental Table 8: HLA-A Allele Summary <sup>a</sup> |                    |          | Allele Count by Population Group <sup>b</sup> |          |           |             |            |           |          |            |             | 3.0.0 CIWD Category by Population Group <sup>c</sup> |           |          |          |          |     |          |          |                   |
|---------------------------------------------------------|--------------------|----------|-----------------------------------------------|----------|-----------|-------------|------------|-----------|----------|------------|-------------|------------------------------------------------------|-----------|----------|----------|----------|-----|----------|----------|-------------------|
| Allele                                                  | Genomic Typing     | AlleleID | G group                                       | AFA      | API       | EURO        | MENA       | HIS       | NAM      | UNK        | Total       | AFA                                                  | API       | EURO     | MENA     | HIS      | NAM | UNK      | Total    | Highest Frequency |
| A*29:07                                                 | 29:07              | HLA01650 |                                               | 0        | 0         | 6           | 0          | 0         | 0        | 3          | 9           |                                                      |           | WD       |          |          |     |          | WD       | WD                |
| A*29:09                                                 | 29:09              | HLA01716 |                                               | 3        | 0         | 18          | 0          | 1         | 1        | 1          | 24          |                                                      |           | WD       |          |          |     |          | WD       | WD                |
| <b>A*29:10 total</b>                                    | <b>29:10 total</b> |          |                                               | <b>2</b> | <b>11</b> | <b>1360</b> | <b>328</b> | <b>25</b> | <b>1</b> | <b>121</b> | <b>1848</b> |                                                      | <b>WD</b> | <b>C</b> | <b>C</b> | <b>I</b> |     | <b>I</b> | <b>C</b> | <b>C</b>          |
| A*29:10                                                 | 29:10              |          |                                               | 2        | 7         | 1030        | 266        | 18        | 1        | 91         | 1415        |                                                      | WD        | I        | C        | I        |     | I        | I        | C                 |
| A*29:10:01                                              | 29:10:01           | HLA01795 |                                               | 0        | 4         | 330         | 62         | 7         | 0        | 30         | 433         |                                                      |           | I        | C        | WD       |     | I        | I        | C                 |
| A*29:11                                                 | 29:11              | HLA01852 |                                               | 21       | 1         | 6           | 17         | 3         | 0        | 7          | 55          | WD                                                   |           | WD       | WD       |          |     | WD       | WD       | WD                |
| A*29:12                                                 | 29:12              | HLA02083 |                                               | 0        | 0         | 46          | 18         | 1         | 0        | 11         | 76          |                                                      |           | WD       | WD       |          |     | WD       | WD       | WD                |
| A*29:13                                                 | 29:13              | HLA02084 |                                               | 2        | 0         | 2           | 0          | 3         | 0        | 0          | 7           |                                                      |           |          |          |          |     |          | WD       | WD                |
| A*29:14                                                 | 29:14              | HLA02256 |                                               | 3        | 0         | 1           | 0          | 1         | 0        | 0          | 5           |                                                      |           |          |          |          |     |          | WD       | WD                |
| A*29:15                                                 | 29:15              | HLA02544 |                                               | 2        | 0         | 0           | 1          | 0         | 0        | 0          | 3           |                                                      |           |          |          |          |     |          |          |                   |
| A*29:16                                                 | 29:16              | HLA02733 |                                               | 0        | 0         | 5           | 0          | 0         | 0        | 0          | 5           |                                                      |           | WD       |          |          |     |          | WD       | WD                |
| A*29:17                                                 | 29:17              | HLA03025 |                                               | 0        | 0         | 4           | 0          | 0         | 0        | 0          | 4           |                                                      |           |          |          |          |     |          |          |                   |
| A*29:18                                                 | 29:18              | HLA03467 |                                               | 0        | 0         | 1           | 0          | 0         | 0        | 0          | 1           |                                                      |           |          |          |          |     |          |          |                   |
| A*29:19                                                 | 29:19              | HLA03560 |                                               | 0        | 0         | 1           | 0          | 0         | 0        | 0          | 1           |                                                      |           |          |          |          |     |          |          |                   |
| A*29:20                                                 | 29:20              | HLA03916 |                                               | 0        | 0         | 3           | 0          | 0         | 0        | 0          | 3           |                                                      |           |          |          |          |     |          |          |                   |
| A*29:21                                                 | 29:21              | HLA04560 |                                               | 0        | 0         | 44          | 1          | 0         | 0        | 2          | 47          |                                                      |           | WD       |          |          |     |          | WD       | WD                |
| A*29:22                                                 | 29:22              | HLA04584 |                                               | 0        | 0         | 1           | 0          | 0         | 0        | 0          | 1           |                                                      |           |          |          |          |     |          |          |                   |
| A*29:23                                                 | 29:23              | HLA05428 |                                               | 12       | 0         | 0           | 0          | 0         | 0        | 1          | 13          | WD                                                   |           |          |          |          |     |          | WD       | WD                |
| A*29:24                                                 | 29:24              | HLA05438 |                                               | 0        | 0         | 1           | 0          | 0         | 0        | 0          | 1           |                                                      |           |          |          |          |     |          |          |                   |
| A*29:28                                                 | 29:28              | HLA06151 |                                               | 0        | 0         | 0           | 1          | 0         | 0        | 0          | 1           |                                                      |           |          |          |          |     |          |          |                   |
| A*29:29                                                 | 29:29              | HLA06553 |                                               | 0        | 0         | 3           | 0          | 0         | 0        | 0          | 3           |                                                      |           |          |          |          |     |          |          |                   |
| A*29:30                                                 | 29:30              | HLA06783 |                                               | 0        | 0         | 2           | 0          | 0         | 0        | 0          | 2           |                                                      |           |          |          |          |     |          |          |                   |
| A*29:32                                                 | 29:32              | HLA07392 |                                               | 0        | 0         | 6           | 3          | 2         | 0        | 2          | 13          |                                                      |           | WD       |          |          |     |          | WD       | WD                |
| A*29:34                                                 | 29:34              | HLA07666 |                                               | 0        | 0         | 18          | 0          | 1         | 0        | 0          | 19          |                                                      |           | WD       |          |          |     |          | WD       | WD                |
| A*29:36                                                 | 29:36              | HLA08027 |                                               | 0        | 0         | 4           | 0          | 0         | 0        | 0          | 4           |                                                      |           |          |          |          |     |          |          |                   |
| A*29:37                                                 | 29:37              | HLA08030 |                                               | 3        | 0         | 0           | 0          | 0         | 0        | 0          | 3           |                                                      |           |          |          |          |     |          |          |                   |
| A*29:40                                                 | 29:40              | HLA08092 |                                               | 2        | 0         | 2           | 0          | 1         | 0        | 2          | 7           |                                                      |           |          |          |          |     |          | WD       | WD                |
| A*29:42                                                 | 29:42              | HLA08245 |                                               | 0        | 0         | 1           | 0          | 0         | 0        | 0          | 1           |                                                      |           |          |          |          |     |          |          |                   |
| A*29:44                                                 | 29:44              | HLA08253 |                                               | 0        | 0         | 14          | 0          | 0         | 0        | 0          | 14          |                                                      |           | WD       |          |          |     |          | WD       | WD                |
| A*29:45                                                 | 29:45              | HLA08254 |                                               | 0        | 0         | 2           | 0          | 0         | 0        | 0          | 2           |                                                      |           |          |          |          |     |          |          |                   |

| Supplemental Table 8: HLA-A Allele Summary <sup>a</sup> |                    |          | Allele Count by Population Group <sup>b</sup> |              |              |               |              |              |             |              |               | 3.0.0 CIWD Category by Population Group <sup>c</sup> |          |          |          |          |          |          |          |                   |
|---------------------------------------------------------|--------------------|----------|-----------------------------------------------|--------------|--------------|---------------|--------------|--------------|-------------|--------------|---------------|------------------------------------------------------|----------|----------|----------|----------|----------|----------|----------|-------------------|
| Allele                                                  | Genomic Typing     | AlleleID | G group                                       | AFA          | API          | EURO          | MENA         | HIS          | NAM         | UNK          | Total         | AFA                                                  | API      | EURO     | MENA     | HIS      | NAM      | UNK      | Total    | Highest Frequency |
| A*29:48                                                 | 29:48              | HLA08810 |                                               | 0            | 0            | 7             | 0            | 0            | 0           | 0            | 7             |                                                      |          | WD       |          |          |          |          | WD       | WD                |
| A*29:51                                                 | 29:51              | HLA09128 |                                               | 0            | 0            | 4             | 0            | 0            | 0           | 0            | 4             |                                                      |          |          |          |          |          |          |          |                   |
| A*29:53                                                 | 29:53              | HLA09410 |                                               | 1            | 0            | 0             | 0            | 0            | 0           | 0            | 1             |                                                      |          |          |          |          |          |          |          |                   |
| A*29:54                                                 | 29:54              | HLA09520 |                                               | 0            | 0            | 2             | 0            | 0            | 0           | 0            | 2             |                                                      |          |          |          |          |          |          |          |                   |
| A*29:55                                                 | 29:55              | HLA09824 |                                               | 0            | 0            | 2             | 0            | 0            | 0           | 0            | 2             |                                                      |          |          |          |          |          |          |          |                   |
| A*29:56                                                 | 29:56              | HLA10450 |                                               | 0            | 1            | 0             | 0            | 0            | 0           | 0            | 1             |                                                      |          |          |          |          |          |          |          |                   |
| A*29:60                                                 | 29:60              | HLA11075 |                                               | 0            | 0            | 1             | 0            | 0            | 0           | 0            | 1             |                                                      |          |          |          |          |          |          |          |                   |
| A*29:61                                                 | 29:61              | HLA11204 |                                               | 0            | 2            | 0             | 0            | 0            | 0           | 0            | 2             |                                                      |          |          |          |          |          |          |          |                   |
| A*29:62                                                 | 29:62              | HLA11205 |                                               | 0            | 0            | 3             | 0            | 0            | 0           | 0            | 3             |                                                      |          |          |          |          |          |          |          |                   |
| A*29:64                                                 | 29:64              | HLA11295 |                                               | 0            | 6            | 0             | 0            | 0            | 0           | 0            | 6             |                                                      | WD       |          |          |          |          |          | WD       | WD                |
| A*29:66                                                 | 29:66              | HLA11390 |                                               | 0            | 0            | 1             | 0            | 0            | 0           | 0            | 1             |                                                      |          |          |          |          |          |          |          |                   |
| A*29:67                                                 | 29:67              | HLA11780 |                                               | 0            | 0            | 1             | 0            | 0            | 0           | 0            | 1             |                                                      |          |          |          |          |          |          |          |                   |
| A*29:69                                                 | 29:69              | HLA11782 |                                               | 0            | 0            | 3             | 0            | 0            | 0           | 0            | 3             |                                                      |          |          |          |          |          |          |          |                   |
| A*29:71                                                 | 29:71              | HLA11968 |                                               | 0            | 0            | 2             | 0            | 0            | 0           | 0            | 2             |                                                      |          |          |          |          |          |          |          |                   |
| A*29:72                                                 | 29:72              | HLA12184 |                                               | 0            | 1            | 1             | 0            | 0            | 0           | 0            | 2             |                                                      |          |          |          |          |          |          |          |                   |
| A*29:73                                                 | 29:73              | HLA12233 |                                               | 0            | 0            | 1             | 0            | 0            | 0           | 0            | 1             |                                                      |          |          |          |          |          |          |          |                   |
| A*29:77                                                 | 29:77              | HLA12925 |                                               | 0            | 0            | 0             | 2            | 0            | 0           | 0            | 2             |                                                      |          |          |          |          |          |          |          |                   |
| A*29:79                                                 | 29:79              | HLA13430 |                                               | 0            | 1            | 0             | 0            | 0            | 0           | 0            | 1             |                                                      |          |          |          |          |          |          |          |                   |
| A*29:81                                                 | 29:81              | HLA13944 |                                               | 0            | 0            | 2             | 0            | 0            | 0           | 0            | 2             |                                                      |          |          |          |          |          |          |          |                   |
| A*29:82                                                 | 29:82              | HLA14121 |                                               | 0            | 3            | 0             | 0            | 0            | 0           | 0            | 3             |                                                      |          |          |          |          |          |          |          |                   |
| A*29:84                                                 | 29:84              | HLA14608 |                                               | 0            | 0            | 0             | 0            | 0            | 0           | 1            | 1             |                                                      |          |          |          |          |          |          |          |                   |
| A*29:87                                                 | 29:87              | HLA14964 |                                               | 0            | 0            | 1             | 0            | 1            | 0           | 0            | 2             |                                                      |          |          |          |          |          |          |          |                   |
| A*29:88                                                 | 29:88              | HLA14968 |                                               | 0            | 0            | 2             | 0            | 4            | 0           | 1            | 7             |                                                      |          |          |          |          |          |          | WD       | WD                |
| A*29:90                                                 | 29:90              | HLA15226 |                                               | 0            | 0            | 1             | 0            | 0            | 0           | 0            | 1             |                                                      |          |          |          |          |          |          |          |                   |
| A*29:91                                                 | 29:91              | HLA15509 |                                               | 0            | 0            | 0             | 0            | 0            | 0           | 1            | 1             |                                                      |          |          |          |          |          |          |          |                   |
| A*29:109                                                | 29:109             | HLA17758 |                                               | 0            | 0            | 0             | 0            | 0            | 0           | 1            | 1             |                                                      |          |          |          |          |          |          |          |                   |
| A*29:CODE                                               | 29:CODE            |          |                                               | 982          | 353          | 24990         | 327          | 2949         | 265         | 3841         | 33707         | NA                                                   | NA       | NA       | NA       | NA       | NA       | NA       | NA       | NA                |
| <b>A*30:01 total</b>                                    | <b>30:01 total</b> |          |                                               | <b>24814</b> | <b>18531</b> | <b>165306</b> | <b>10307</b> | <b>11505</b> | <b>1366</b> | <b>23966</b> | <b>255795</b> | <b>C</b>                                             | <b>C</b> | <b>C</b> | <b>C</b> | <b>C</b> | <b>C</b> | <b>C</b> | <b>C</b> | <b>C</b>          |
| A*30:01                                                 | 30:01              |          |                                               | 4            | 2            | 1326          | 1            | 7            | 0           | 69           | 1409          |                                                      |          | C        |          | WD       |          | I        | I        | C                 |
| A*30:01P                                                | 30:01P             |          |                                               | 2            | 0            | 371           | 3            | 1            | 0           | 1            | 378           |                                                      |          | I        |          |          |          |          | I        | I                 |



| Supplemental Table 8: HLA-A Allele Summary <sup>a</sup> |                        |          | Allele Count by Population Group <sup>b</sup> |              |              |               |              |              |             |              |               | 3.0.0 CIWD Category by Population Group <sup>c</sup> |          |          |          |          |          |          |          |                   |
|---------------------------------------------------------|------------------------|----------|-----------------------------------------------|--------------|--------------|---------------|--------------|--------------|-------------|--------------|---------------|------------------------------------------------------|----------|----------|----------|----------|----------|----------|----------|-------------------|
| Allele                                                  | Genomic Typing         | AlleleID | G group                                       | AFA          | API          | EURO          | MENA         | HIS          | NAM         | UNK          | Total         | AFA                                                  | API      | EURO     | MENA     | HIS      | NAM      | UNK      | Total    | Highest Frequency |
| <b>A*30:01:01G total</b>                                | <b>30:01:01G total</b> |          |                                               | <b>24806</b> | <b>18529</b> | <b>163604</b> | <b>10301</b> | <b>11497</b> | <b>1366</b> | <b>23895</b> | <b>253998</b> | <b>C</b>                                             | <b>C</b> | <b>C</b> | <b>C</b> | <b>C</b> | <b>C</b> | <b>C</b> | <b>C</b> | <b>C</b>          |
| A*30:01:01G                                             | 30:01:01G              |          | 30:01:01G                                     | 19612        | 16301        | 155995        | 9900         | 8245         | 967         | 21327        | 232347        | C                                                    | C        | C        | C        | C        | C        | C        | C        | C                 |
| A*30:01:01                                              | 30:01:01               | HLA00089 | 30:01:01G                                     | 5194         | 2228         | 7594          | 401          | 3252         | 399         | 2568         | 21636         | C                                                    | C        | C        | C        | C        | C        | C        | C        | C                 |
| A*30:24                                                 | 30:24                  | HLA03097 | 30:01:01G                                     | 0            | 0            | 14            | 0            | 0            | 0           | 0            | 14            |                                                      |          | WD       |          |          |          |          | WD       | WD                |
| A*30:114                                                | 30:114                 | HLA16675 | 30:01:01G                                     | 0            | 0            | 1             | 0            | 0            | 0           | 0            | 1             |                                                      |          |          |          |          |          |          |          |                   |
| A*30:01:03                                              | 30:01:03               | HLA04809 |                                               | 0            | 0            | 1             | 0            | 0            | 0           | 0            | 1             |                                                      |          |          |          |          |          |          |          |                   |
| A*30:01:04                                              | 30:01:04               | HLA05681 |                                               | 0            | 0            | 2             | 2            | 0            | 0           | 0            | 4             |                                                      |          |          |          |          |          |          |          |                   |
| A*30:01:06                                              | 30:01:06               | HLA08029 |                                               | 1            | 0            | 0             | 0            | 0            | 0           | 0            | 1             |                                                      |          |          |          |          |          |          |          |                   |
| A*30:01:07                                              | 30:01:07               | HLA08269 |                                               | 0            | 0            | 1             | 0            | 0            | 0           | 1            | 2             |                                                      |          |          |          |          |          |          |          |                   |
| A*30:01:08                                              | 30:01:08               | HLA10451 |                                               | 0            | 0            | 1             | 0            | 0            | 0           | 0            | 1             |                                                      |          |          |          |          |          |          |          |                   |
| A*30:01:11                                              | 30:01:11               | HLA14212 |                                               | 1            | 0            | 0             | 0            | 0            | 0           | 0            | 1             |                                                      |          |          |          |          |          |          |          |                   |
| <b>A*30:02 total</b>                                    | <b>30:02 total</b>     |          |                                               | <b>23390</b> | <b>2326</b>  | <b>68416</b>  | <b>5507</b>  | <b>15031</b> | <b>1362</b> | <b>18952</b> | <b>134984</b> | <b>C</b>                                             | <b>C</b> | <b>C</b> | <b>C</b> | <b>C</b> | <b>C</b> | <b>C</b> | <b>C</b> | <b>C</b>          |
| A*30:02                                                 | 30:02                  |          |                                               | 135          | 5            | 1686          | 46           | 16           | 6           | 241          | 2135          | C                                                    | WD       | C        | C        | I        | WD       | C        | C        | C                 |
| A*30:02P                                                | 30:02P                 |          |                                               | 2            | 0            | 175           | 5            | 2            | 0           | 2            | 186           |                                                      |          | I        | WD       |          |          |          | I        | I                 |
| <b>A*30:02:01G total</b>                                | <b>30:02:01G total</b> |          |                                               | <b>23235</b> | <b>2321</b>  | <b>66547</b>  | <b>5456</b>  | <b>14999</b> | <b>1356</b> | <b>18701</b> | <b>132615</b> | <b>C</b>                                             | <b>C</b> | <b>C</b> | <b>C</b> | <b>C</b> | <b>C</b> | <b>C</b> | <b>C</b> | <b>C</b>          |
| A*30:02:01G                                             | 30:02:01G              |          | 30:02:01G                                     | 18162        | 2119         | 61576         | 5205         | 10601        | 939         | 16468        | 115070        | C                                                    | C        | C        | C        | C        | C        | C        | C        | C                 |
| A*30:02:01                                              | 30:02:01               |          | 30:02:01G                                     | 2013         | 75           | 1937          | 87           | 1748         | 148         | 994          | 7002          | C                                                    | I        | C        | C        | C        | C        | C        | C        | C                 |
| A*30:02:01:01                                           | 30:02:01:01            | HLA00090 | 30:02:01G                                     | 1280         | 119          | 2630          | 156          | 2013         | 175         | 753          | 7126          | C                                                    | I        | C        | C        | C        | C        | C        | C        | C                 |
| A*30:02:01:02                                           | 30:02:01:02            | HLA11775 | 30:02:01G                                     | 1148         | 7            | 380           | 7            | 473          | 68          | 333          | 2416          | C                                                    | WD       | I        | WD       | C        | C        | C        | C        | C                 |
| A*30:02:01:03                                           | 30:02:01:03            | HLA12614 | 30:02:01G                                     | 628          | 1            | 24            | 1            | 164          | 26          | 152          | 996           | C                                                    |          | WD       |          | C        | C        | C        | I        | C                 |
| A*30:33                                                 | 30:33                  | HLA04637 | 30:02:01G                                     | 4            | 0            | 0             | 0            | 0            | 0           | 1            | 5             |                                                      |          |          |          |          |          |          | WD       | WD                |
| A*30:02:03                                              | 30:02:03               | HLA02199 |                                               | 0            | 0            | 2             | 0            | 13           | 0           | 3            | 18            |                                                      |          |          |          | I        |          |          | WD       | I                 |
| A*30:02:04                                              | 30:02:04               | HLA03142 |                                               | 6            | 0            | 0             | 0            | 0            | 0           | 1            | 7             | WD                                                   |          |          |          |          |          |          | WD       | WD                |
| A*30:02:05                                              | 30:02:05               | HLA04643 |                                               | 7            | 0            | 0             | 0            | 1            | 0           | 0            | 8             | WD                                                   |          |          |          |          |          |          | WD       | WD                |
| A*30:02:06                                              | 30:02:06               | HLA08037 |                                               | 0            | 0            | 5             | 0            | 0            | 0           | 1            | 6             |                                                      |          | WD       |          |          |          |          | WD       | WD                |
| A*30:02:09                                              | 30:02:09               | HLA08622 |                                               | 0            | 0            | 0             | 0            | 0            | 0           | 1            | 1             |                                                      |          |          |          |          |          |          |          |                   |
| A*30:02:10                                              | 30:02:10               | HLA08623 |                                               | 1            | 0            | 0             | 0            | 0            | 0           | 1            | 2             |                                                      |          |          |          |          |          |          |          |                   |
| A*30:02:13                                              | 30:02:13               | HLA10504 |                                               | 1            | 0            | 0             | 0            | 0            | 0           | 0            | 1             |                                                      |          |          |          |          |          |          |          |                   |
| A*30:02:14                                              | 30:02:14               | HLA11316 |                                               | 3            | 0            | 0             | 0            | 0            | 0           | 1            | 4             |                                                      |          |          |          |          |          |          |          |                   |
| A*30:02:15                                              | 30:02:15               | HLA11636 |                                               | 0            | 0            | 1             | 0            | 0            | 0           | 0            | 1             |                                                      |          |          |          |          |          |          |          |                   |

| Supplemental Table 8: HLA-A Allele Summary <sup>a</sup> |                        |          | Allele Count by Population Group <sup>b</sup> |             |            |              |             |             |            |             |              | 3.0.0 CIWD Category by Population Group <sup>c</sup> |          |           |          |          |          |          |           |                   |
|---------------------------------------------------------|------------------------|----------|-----------------------------------------------|-------------|------------|--------------|-------------|-------------|------------|-------------|--------------|------------------------------------------------------|----------|-----------|----------|----------|----------|----------|-----------|-------------------|
| Allele                                                  | Genomic Typing         | AlleleID | G group                                       | AFA         | API        | EURO         | MENA        | HIS         | NAM        | UNK         | Total        | AFA                                                  | API      | EURO      | MENA     | HIS      | NAM      | UNK      | Total     | Highest Frequency |
| A*30:03                                                 | 30:03                  | HLA00091 |                                               | 0           | 0          | 36           | 1           | 0           | 0          | 4           | 41           |                                                      |          | WD        |          |          |          |          | WD        | WD                |
| <b>A*30:04 total</b>                                    | <b>30:04 total</b>     |          |                                               | <b>1302</b> | <b>775</b> | <b>17898</b> | <b>3093</b> | <b>2108</b> | <b>241</b> | <b>4037</b> | <b>29454</b> | <b>C</b>                                             | <b>C</b> | <b>C</b>  | <b>C</b> | <b>C</b> | <b>C</b> | <b>C</b> | <b>C</b>  | <b>C</b>          |
| A*30:04                                                 | 30:04                  |          |                                               | 32          | 46         | 1464         | 204         | 104         | 6          | 299         | 2155         | WD                                                   | I        | C         | C        | C        | WD       | C        | C         | C                 |
| A*30:04P                                                | 30:04P                 |          |                                               | 0           | 0          | 71           | 0           | 0           | 0          | 0           | 71           |                                                      |          | WD        |          |          |          |          | WD        | WD                |
| <b>A*30:04:01G total</b>                                | <b>30:04:01G total</b> |          |                                               | <b>1270</b> | <b>729</b> | <b>16361</b> | <b>2852</b> | <b>2004</b> | <b>235</b> | <b>3737</b> | <b>27188</b> | <b>C</b>                                             | <b>C</b> | <b>C</b>  | <b>C</b> | <b>C</b> | <b>C</b> | <b>C</b> | <b>C</b>  | <b>C</b>          |
| A*30:04:01G                                             | 30:04:01G              |          | 30:04:01G                                     | 793         | 441        | 12934        | 2386        | 1130        | 118        | 2711        | 20513        | C                                                    | C        | C         | C        | C        | C        | C        | C         | C                 |
| A*30:04:01                                              | 30:04:01               | HLA00092 | 30:04:01G                                     | 477         | 288        | 3427         | 466         | 874         | 117        | 1026        | 6675         | C                                                    | C        | C         | C        | C        | C        | C        | C         | C                 |
| A*30:04:02                                              | 30:04:02               | HLA05744 |                                               | 0           | 0          | 2            | 37          | 0           | 0          | 1           | 40           |                                                      |          |           | WD       |          |          |          | WD        | WD                |
| A*30:07                                                 | 30:07                  | HLA00095 |                                               | 100         | 0          | 2            | 0           | 2           | 1          | 15          | 120          | C                                                    |          |           |          |          |          | I        | WD        | C                 |
| A*30:08                                                 | 30:08                  | HLA01112 |                                               | 11          | 0          | 1            | 6           | 0           | 0          | 2           | 20           | WD                                                   |          |           | WD       |          |          |          | WD        | WD                |
| A*30:09                                                 | 30:09                  | HLA01224 |                                               | 33          | 0          | 3            | 7           | 14          | 0          | 10          | 67           | WD                                                   |          |           | WD       | I        |          | WD       | WD        | I                 |
| A*30:10                                                 | 30:10                  | HLA01411 |                                               | 161         | 18         | 490          | 111         | 894         | 172        | 299         | 2145         | C                                                    | I        | I         | C        | C        | C        | C        | C         | C                 |
| <b>A*30:11 total</b>                                    | <b>30:11 total</b>     |          |                                               | <b>0</b>    | <b>64</b>  | <b>11</b>    | <b>0</b>    | <b>0</b>    | <b>0</b>   | <b>1</b>    | <b>76</b>    |                                                      | <b>I</b> | <b>WD</b> |          |          |          |          | <b>WD</b> | <b>I</b>          |
| A*30:11:01                                              | 30:11:01               | HLA01445 |                                               | 0           | 0          | 10           | 0           | 0           | 0          | 1           | 11           |                                                      |          | WD        |          |          |          |          | WD        | WD                |
| A*30:11:02                                              | 30:11:02               | HLA03102 |                                               | 0           | 64         | 1            | 0           | 0           | 0          | 0           | 65           |                                                      | I        |           |          |          |          |          | WD        | I                 |
| A*30:12                                                 | 30:12                  | HLA01584 |                                               | 0           | 0          | 0            | 0           | 2           | 1          | 0           | 3            |                                                      |          |           |          |          |          |          |           |                   |
| A*30:13                                                 | 30:13                  | HLA02102 |                                               | 0           | 0          | 1            | 0           | 0           | 0          | 0           | 1            |                                                      |          |           |          |          |          |          |           |                   |
| A*30:14L                                                | 30:14L                 | HLA02116 |                                               | 0           | 0          | 4            | 0           | 0           | 0          | 0           | 4            |                                                      |          |           |          |          |          |          |           |                   |
| A*30:15                                                 | 30:15                  | HLA02127 |                                               | 0           | 1          | 20           | 1           | 0           | 0          | 2           | 24           |                                                      |          | WD        |          |          |          |          | WD        | WD                |
| A*30:16                                                 | 30:16                  | HLA02439 |                                               | 9           | 0          | 1            | 0           | 0           | 0          | 2           | 12           | WD                                                   |          |           |          |          |          |          | WD        | WD                |
| A*30:17                                                 | 30:17                  | HLA02510 |                                               | 0           | 0          | 1            | 0           | 0           | 0          | 1           | 2            |                                                      |          |           |          |          |          |          |           |                   |
| A*30:18                                                 | 30:18                  | HLA02646 |                                               | 0           | 8          | 1            | 2           | 0           | 0          | 0           | 11           |                                                      | WD       |           |          |          |          |          | WD        | WD                |
| A*30:19                                                 | 30:19                  | HLA02760 |                                               | 0           | 0          | 1            | 1           | 0           | 0          | 0           | 2            |                                                      |          |           |          |          |          |          |           |                   |
| A*30:22                                                 | 30:22                  | HLA02980 |                                               | 0           | 0          | 2            | 0           | 0           | 0          | 0           | 2            |                                                      |          |           |          |          |          |          |           |                   |
| A*30:23                                                 | 30:23                  | HLA02997 |                                               | 0           | 0          | 1            | 0           | 0           | 0          | 0           | 1            |                                                      |          |           |          |          |          |          |           |                   |
| A*30:25                                                 | 30:25                  | HLA03308 |                                               | 0           | 0          | 1            | 1           | 2           | 0          | 1           | 5            |                                                      |          |           |          |          |          |          | WD        | WD                |
| A*30:26                                                 | 30:26                  | HLA03502 |                                               | 0           | 0          | 2            | 1           | 0           | 0          | 1           | 4            |                                                      |          |           |          |          |          |          |           |                   |
| A*30:28                                                 | 30:28                  | HLA03564 |                                               | 8           | 0          | 0            | 0           | 0           | 0          | 3           | 11           | WD                                                   |          |           |          |          |          |          | WD        | WD                |
| A*30:29                                                 | 30:29                  | HLA03871 |                                               | 0           | 0          | 51           | 6           | 1           | 0          | 3           | 61           |                                                      |          | WD        | WD       |          |          |          | WD        | WD                |
| A*30:30                                                 | 30:30                  | HLA04138 |                                               | 1           | 0          | 8            | 0           | 0           | 0          | 0           | 9            |                                                      |          | WD        |          |          |          |          | WD        | WD                |

| Supplemental Table 8: HLA-A Allele Summary <sup>a</sup> |                |          | Allele Count by Population Group <sup>b</sup> |     |     |      |      |     |     |     |       | 3.0.0 CIWD Category by Population Group <sup>c</sup> |     |      |      |     |     |     |       |                   |  |
|---------------------------------------------------------|----------------|----------|-----------------------------------------------|-----|-----|------|------|-----|-----|-----|-------|------------------------------------------------------|-----|------|------|-----|-----|-----|-------|-------------------|--|
| Allele                                                  | Genomic Typing | AlleleID | G group                                       | AFA | API | EURO | MENA | HIS | NAM | UNK | Total | AFA                                                  | API | EURO | MENA | HIS | NAM | UNK | Total | Highest Frequency |  |
| A*30:31                                                 | 30:31          | HLA04146 |                                               | 5   | 0   | 0    | 0    | 0   | 0   | 1   | 6     | WD                                                   |     |      |      |     |     |     | WD    | WD                |  |
| A*30:32                                                 | 30:32          | HLA04522 |                                               | 2   | 0   | 0    | 0    | 0   | 0   | 0   | 2     |                                                      |     |      |      |     |     |     |       |                   |  |
| A*30:34                                                 | 30:34          | HLA04651 |                                               | 1   | 0   | 1    | 0    | 0   | 0   | 1   | 3     |                                                      |     |      |      |     |     |     |       |                   |  |
| A*30:36                                                 | 30:36          | HLA04850 |                                               | 0   | 0   | 18   | 0    | 0   | 0   | 0   | 18    |                                                      |     | WD   |      |     |     |     | WD    | WD                |  |
| A*30:40                                                 | 30:40          | HLA05331 |                                               | 0   | 0   | 33   | 0    | 0   | 0   | 1   | 34    |                                                      |     | WD   |      |     |     |     | WD    | WD                |  |
| A*30:41                                                 | 30:41          | HLA05340 |                                               | 0   | 0   | 0    | 1    | 0   | 0   | 0   | 1     |                                                      |     |      |      |     |     |     |       |                   |  |
| A*30:42                                                 | 30:42          | HLA05452 |                                               | 0   | 0   | 4    | 0    | 0   | 0   | 0   | 4     |                                                      |     |      |      |     |     |     |       |                   |  |
| A*30:44                                                 | 30:44          | HLA05551 |                                               | 0   | 0   | 1    | 0    | 0   | 0   | 0   | 1     |                                                      |     |      |      |     |     |     |       |                   |  |
| A*30:45                                                 | 30:45          | HLA05667 |                                               | 3   | 0   | 0    | 0    | 0   | 0   | 0   | 3     |                                                      |     |      |      |     |     |     |       |                   |  |
| A*30:46                                                 | 30:46          | HLA05652 |                                               | 0   | 0   | 2    | 0    | 0   | 0   | 0   | 2     |                                                      |     |      |      |     |     |     |       |                   |  |
| A*30:47                                                 | 30:47          | HLA06193 |                                               | 0   | 0   | 0    | 5    | 0   | 0   | 0   | 5     |                                                      |     |      | WD   |     |     |     | WD    | WD                |  |
| A*30:51                                                 | 30:51          | HLA06206 |                                               | 0   | 0   | 2    | 0    | 15  | 3   | 3   | 23    |                                                      |     |      |      | I   |     |     | WD    | I                 |  |
| A*30:53                                                 | 30:53          | HLA06742 |                                               | 0   | 0   | 4    | 0    | 0   | 0   | 0   | 4     |                                                      |     |      |      |     |     |     |       |                   |  |
| A*30:54                                                 | 30:54          | HLA06749 |                                               | 0   | 2   | 1    | 0    | 1   | 0   | 2   | 6     |                                                      |     |      |      |     |     |     | WD    | WD                |  |
| A*30:55                                                 | 30:55          | HLA06833 |                                               | 0   | 1   | 0    | 0    | 0   | 0   | 0   | 1     |                                                      |     |      |      |     |     |     |       |                   |  |
| A*30:56                                                 | 30:56          | HLA07395 |                                               | 1   | 0   | 3    | 0    | 0   | 0   | 1   | 5     |                                                      |     |      |      |     |     |     | WD    | WD                |  |
| A*30:57                                                 | 30:57          | HLA07396 |                                               | 0   | 0   | 2    | 0    | 0   | 0   | 0   | 2     |                                                      |     |      |      |     |     |     |       |                   |  |
| A*30:58                                                 | 30:58          | HLA07397 |                                               | 0   | 0   | 5    | 0    | 0   | 0   | 0   | 5     |                                                      |     | WD   |      |     |     |     | WD    | WD                |  |
| A*30:59N                                                | 30:59N         | HLA07559 |                                               | 1   | 0   | 1    | 0    | 0   | 0   | 0   | 2     |                                                      |     |      |      |     |     |     |       |                   |  |
| A*30:61                                                 | 30:61          | HLA07587 |                                               | 0   | 0   | 0    | 1    | 0   | 0   | 0   | 1     |                                                      |     |      |      |     |     |     |       |                   |  |
| A*30:63                                                 | 30:63          | HLA07794 |                                               | 0   | 0   | 2    | 0    | 0   | 0   | 0   | 2     |                                                      |     |      |      |     |     |     |       |                   |  |
| A*30:65                                                 | 30:65          | HLA08038 |                                               | 1   | 0   | 0    | 0    | 0   | 0   | 0   | 1     |                                                      |     |      |      |     |     |     |       |                   |  |
| A*30:67                                                 | 30:67          | HLA08624 |                                               | 0   | 0   | 4    | 0    | 0   | 0   | 0   | 4     |                                                      |     |      |      |     |     |     |       |                   |  |
| A*30:70N                                                | 30:70N         | HLA08789 |                                               | 7   | 0   | 0    | 0    | 0   | 0   | 1   | 8     | WD                                                   |     |      |      |     |     |     | WD    | WD                |  |
| A*30:71                                                 | 30:71          | HLA08949 |                                               | 0   | 0   | 1    | 0    | 0   | 0   | 0   | 1     |                                                      |     |      |      |     |     |     |       |                   |  |
| A*30:73N                                                | 30:73N         | HLA09409 |                                               | 0   | 0   | 1    | 0    | 0   | 0   | 0   | 1     |                                                      |     |      |      |     |     |     |       |                   |  |
| A*30:76N                                                | 30:76N         | HLA09529 |                                               | 0   | 0   | 0    | 1    | 0   | 0   | 1   | 2     |                                                      |     |      |      |     |     |     |       |                   |  |
| A*30:78N                                                | 30:78N         | HLA09705 |                                               | 11  | 0   | 2    | 0    | 0   | 0   | 1   | 14    | WD                                                   |     |      |      |     |     |     | WD    | WD                |  |
| A*30:80                                                 | 30:80          | HLA10633 |                                               | 0   | 0   | 1    | 0    | 0   | 0   | 0   | 1     |                                                      |     |      |      |     |     |     |       |                   |  |
| A*30:88                                                 | 30:88          | HLA12107 |                                               | 1   | 0   | 0    | 0    | 0   | 0   | 0   | 1     |                                                      |     |      |      |     |     |     |       |                   |  |

| Supplemental Table 8: HLA-A Allele Summary <sup>a</sup> |                        |          | Allele Count by Population Group <sup>b</sup> |             |              |               |             |              |             |              |               | 3.0.0 CIWD Category by Population Group <sup>c</sup> |          |          |          |          |          |          |          |                   |          |
|---------------------------------------------------------|------------------------|----------|-----------------------------------------------|-------------|--------------|---------------|-------------|--------------|-------------|--------------|---------------|------------------------------------------------------|----------|----------|----------|----------|----------|----------|----------|-------------------|----------|
| Allele                                                  | Genomic Typing         | AlleleID | G group                                       | AFA         | API          | EURO          | MENA        | HIS          | NAM         | UNK          | Total         | AFA                                                  | API      | EURO     | MENA     | HIS      | NAM      | UNK      | Total    | Highest Frequency |          |
| A*30:89                                                 | 30:89                  | HLA12174 |                                               | 0           | 0            | 1             | 0           | 0            | 0           | 0            | 1             |                                                      |          |          |          |          |          |          |          |                   |          |
| A*30:91                                                 | 30:91                  | HLA12245 |                                               | 0           | 0            | 0             | 0           | 0            | 0           | 1            | 1             |                                                      |          |          |          |          |          |          |          |                   |          |
| A*30:92                                                 | 30:92                  | HLA12549 |                                               | 0           | 0            | 1             | 0           | 0            | 0           | 1            | 2             |                                                      |          |          |          |          |          |          |          |                   |          |
| A*30:94                                                 | 30:94                  | HLA12947 |                                               | 0           | 1            | 0             | 0           | 0            | 0           | 0            | 1             |                                                      |          |          |          |          |          |          |          |                   |          |
| A*30:103                                                | 30:103                 | HLA15520 |                                               | 0           | 0            | 0             | 1           | 0            | 0           | 0            | 1             |                                                      |          |          |          |          |          |          |          |                   |          |
| A*30:CODE                                               | 30:CODE                |          |                                               | 2963        | 669          | 15473         | 413         | 2455         | 224         | 3360         | 25557         | NA                                                   | NA       | NA       | NA       | NA       | NA       | NA       | NA       | NA                | NA       |
| <b>A*31:01 total</b>                                    | <b>31:01 total</b>     |          |                                               | <b>3636</b> | <b>38363</b> | <b>274467</b> | <b>8670</b> | <b>31512</b> | <b>2958</b> | <b>36725</b> | <b>396331</b> | <b>C</b>                                             | <b>C</b> | <b>C</b> | <b>C</b> | <b>C</b> | <b>C</b> | <b>C</b> | <b>C</b> | <b>C</b>          | <b>C</b> |
| A*31:01                                                 | 31:01                  |          |                                               | 0           | 4            | 1274          | 3           | 23           | 0           | 41           | 1345          |                                                      |          | C        |          | I        |          | I        | I        | I                 | C        |
| A*31:01P                                                | 31:01P                 |          |                                               | 0           | 2            | 273           | 2           | 2            | 0           | 1            | 280           |                                                      |          | I        |          |          |          |          | I        | I                 | I        |
| <b>A*31:01:02G total</b>                                | <b>31:01:02G total</b> |          |                                               | <b>3636</b> | <b>38358</b> | <b>272915</b> | <b>8664</b> | <b>31407</b> | <b>2953</b> | <b>36670</b> | <b>394603</b> | <b>C</b>                                             | <b>C</b> | <b>C</b> | <b>C</b> | <b>C</b> | <b>C</b> | <b>C</b> | <b>C</b> | <b>C</b>          | <b>C</b> |
| A*31:01:02G                                             | 31:01:02G              |          | 31:01:02G                                     | 2758        | 35119        | 257878        | 8469        | 22392        | 2132        | 33148        | 361896        | C                                                    | C        | C        | C        | C        | C        | C        | C        | C                 | C        |
| A*31:01:02                                              | 31:01:02               |          | 31:01:02G                                     | 415         | 1326         | 5729          | 66          | 3605         | 320         | 1714         | 13175         | C                                                    | C        | C        | C        | C        | C        | C        | C        | C                 | C        |
| A*31:01:02:01                                           | 31:01:02:01            | HLA00097 | 31:01:02G                                     | 458         | 1909         | 8907          | 125         | 5318         | 490         | 1754         | 18961         | C                                                    | C        | C        | C        | C        | C        | C        | C        | C                 | C        |
| A*31:01:02:02                                           | 31:01:02:02            | HLA12600 | 31:01:02G                                     | 0           | 0            | 3             | 1           | 1            | 0           | 3            | 8             |                                                      |          |          |          |          |          |          |          | WD                | WD       |
| <b>A*31:01N</b>                                         | <b>31:01N total</b>    |          |                                               | <b>0</b>    | <b>1</b>     | <b>1</b>      | <b>0</b>    | <b>0</b>     | <b>0</b>    | <b>0</b>     | <b>2</b>      |                                                      |          |          |          |          |          |          |          |                   |          |
| A*31:01:02:03N                                          | 31:01:02:03N           | HLA13489 | 31:01:02G                                     | 0           | 1            | 1             | 0           | 0            | 0           | 0            | 2             |                                                      |          |          |          |          |          |          |          |                   |          |
| A*31:01:02:04                                           | 31:01:02:04            | HLA15497 | 31:01:02G                                     | 4           | 2            | 357           | 3           | 89           | 11          | 46           | 512           |                                                      |          | I        |          | C        | C        | I        | I        | I                 | C        |
| A*31:01:02:05                                           | 31:01:02:05            | HLA16401 | 31:01:02G                                     | 0           | 0            | 0             | 0           | 0            | 0           | 1            | 1             |                                                      |          |          |          |          |          |          |          |                   |          |
| A*31:01:02:06                                           | 31:01:02:06            | HLA16404 | 31:01:02G                                     | 0           | 0            | 0             | 0           | 0            | 0           | 1            | 1             |                                                      |          |          |          |          |          |          |          |                   |          |
| A*31:14N                                                | 31:14N                 | HLA02651 | 31:01:02G                                     | 0           | 0            | 7             | 0           | 1            | 0           | 1            | 9             |                                                      |          | WD       |          |          |          |          |          | WD                | WD       |
| A*31:23                                                 | 31:23                  | HLA03417 | 31:01:02G                                     | 0           | 0            | 8             | 0           | 0            | 0           | 2            | 10            |                                                      |          | WD       |          |          |          |          |          | WD                | WD       |
| A*31:48                                                 | 31:48                  | HLA06122 | 31:01:02G                                     | 1           | 0            | 25            | 0           | 0            | 0           | 0            | 26            |                                                      |          | WD       |          |          |          |          |          | WD                | WD       |
| A*31:71                                                 | 31:71                  | HLA08929 | 31:01:02G                                     | 0           | 1            | 0             | 0           | 0            | 0           | 0            | 1             |                                                      |          |          |          |          |          |          |          |                   |          |
| A*31:119                                                | 31:119                 | HLA16407 | 31:01:02G                                     | 0           | 0            | 0             | 0           | 1            | 0           | 0            | 1             |                                                      |          |          |          |          |          |          |          |                   |          |
| A*31:01:04                                              | 31:01:04               | HLA04466 |                                               | 0           | 0            | 3             | 0           | 78           | 5           | 12           | 98            |                                                      |          |          |          | C        | WD       | WD       | WD       | WD                | C        |
| A*31:01:05                                              | 31:01:05               | HLA04467 |                                               | 0           | 0            | 1             | 0           | 0            | 0           | 0            | 1             |                                                      |          |          |          |          |          |          |          |                   |          |
| A*31:01:11                                              | 31:01:11               | HLA07421 |                                               | 0           | 0            | 2             | 0           | 0            | 0           | 0            | 2             |                                                      |          |          |          |          |          |          |          |                   |          |
| A*31:01:12                                              | 31:01:12               | HLA07568 |                                               | 0           | 0            | 1             | 0           | 0            | 0           | 0            | 1             |                                                      |          |          |          |          |          |          |          |                   |          |
| A*31:01:16                                              | 31:01:16               | HLA08252 |                                               | 0           | 0            | 1             | 1           | 3            | 0           | 0            | 5             |                                                      |          |          |          |          |          |          |          | WD                | WD       |
| A*31:01:22                                              | 31:01:22               | HLA10961 |                                               | 0           | 0            | 1             | 0           | 0            | 0           | 0            | 1             |                                                      |          |          |          |          |          |          |          |                   |          |

| Supplemental Table 8: HLA-A Allele Summary <sup>a</sup> |                |          | Allele Count by Population Group <sup>b</sup> |     |     |      |      |     |     |     |       | 3.0.0 CIWD Category by Population Group <sup>c</sup> |     |      |      |     |     |     |       |                   |  |
|---------------------------------------------------------|----------------|----------|-----------------------------------------------|-----|-----|------|------|-----|-----|-----|-------|------------------------------------------------------|-----|------|------|-----|-----|-----|-------|-------------------|--|
| Allele                                                  | Genomic Typing | AlleleID | G group                                       | AFA | API | EURO | MENA | HIS | NAM | UNK | Total | AFA                                                  | API | EURO | MENA | HIS | NAM | UNK | Total | Highest Frequency |  |
| A*31:01:23                                              | 31:01:23       | HLA12237 |                                               | 0   | 0   | 1    | 0    | 0   | 0   | 0   | 1     |                                                      |     |      |      |     |     |     |       |                   |  |
| A*31:01:24                                              | 31:01:24       | HLA12433 |                                               | 0   | 0   | 3    | 0    | 0   | 0   | 1   | 4     |                                                      |     |      |      |     |     |     |       |                   |  |
| A*31:01:26                                              | 31:01:26       | HLA17756 |                                               | 0   | 0   | 0    | 0    | 0   | 0   | 1   | 1     |                                                      |     |      |      |     |     |     |       |                   |  |
| A*31:02                                                 | 31:02          | HLA00098 |                                               | 6   | 4   | 66   | 1    | 735 | 38  | 150 | 1000  | WD                                                   |     | WD   |      | C   | C   | C   | I     | C                 |  |
| A*31:04                                                 | 31:04          | HLA00100 |                                               | 151 | 4   | 17   | 98   | 6   | 4   | 36  | 316   | C                                                    |     | WD   | C    | WD  |     | I   | I     | C                 |  |
| A*31:05                                                 | 31:05          | HLA01199 |                                               | 0   | 4   | 0    | 0    | 0   | 0   | 1   | 5     |                                                      |     |      |      |     |     |     | WD    | WD                |  |
| A*31:06                                                 | 31:06          | HLA01546 |                                               | 0   | 390 | 24   | 39   | 0   | 1   | 18  | 472   |                                                      | C   | WD   | WD   |     |     | I   | I     | C                 |  |
| A*31:07                                                 | 31:07          | HLA01603 |                                               | 0   | 0   | 1    | 0    | 11  | 0   | 1   | 13    |                                                      |     |      |      | I   |     |     | WD    | I                 |  |
| A*31:08                                                 | 31:08          | HLA00066 |                                               | 1   | 2   | 439  | 0    | 1   | 0   | 9   | 452   |                                                      |     | I    |      |     |     | WD  | I     | I                 |  |
| A*31:09                                                 | 31:09          | HLA01651 |                                               | 2   | 1   | 23   | 0    | 240 | 12  | 28  | 306   |                                                      |     | WD   |      | C   | C   | I   | I     | C                 |  |
| A*31:10                                                 | 31:10          | HLA01970 |                                               | 0   | 0   | 1    | 0    | 1   | 0   | 2   | 4     |                                                      |     |      |      |     |     |     |       |                   |  |
| A*31:11                                                 | 31:11          | HLA02040 |                                               | 0   | 13  | 0    | 0    | 0   | 0   | 1   | 14    |                                                      | I   |      |      |     |     |     | WD    | I                 |  |
| A*31:12                                                 | 31:12          | HLA02085 |                                               | 1   | 684 | 8    | 4    | 0   | 1   | 14  | 712   |                                                      | C   | WD   |      |     |     | I   | I     | C                 |  |
| A*31:13                                                 | 31:13          | HLA02355 |                                               | 0   | 14  | 1    | 0    | 0   | 0   | 0   | 15    |                                                      | I   |      |      |     |     |     | WD    | I                 |  |
| A*31:15                                                 | 31:15          | HLA02737 |                                               | 6   | 0   | 41   | 0    | 80  | 0   | 61  | 188   | WD                                                   |     | WD   |      | C   |     | I   | I     | C                 |  |
| A*31:16                                                 | 31:16          | HLA02898 |                                               | 1   | 369 | 6    | 12   | 1   | 6   | 7   | 402   |                                                      | C   | WD   | WD   |     | WD  | WD  | I     | C                 |  |
| A*31:18                                                 | 31:18          | HLA02934 |                                               | 1   | 0   | 2    | 1    | 42  | 2   | 9   | 57    |                                                      |     |      |      | I   |     | WD  | WD    | I                 |  |
| A*31:19                                                 | 31:19          | HLA03016 |                                               | 0   | 0   | 5    | 1    | 3   | 0   | 0   | 9     |                                                      |     | WD   |      |     |     |     | WD    | WD                |  |
| A*31:20                                                 | 31:20          | HLA03116 |                                               | 0   | 0   | 35   | 0    | 0   | 0   | 7   | 42    |                                                      |     | WD   |      |     |     | WD  | WD    | WD                |  |
| A*31:21                                                 | 31:21          | HLA03141 |                                               | 0   | 0   | 1    | 0    | 0   | 0   | 0   | 1     |                                                      |     |      |      |     |     |     |       |                   |  |
| A*31:24                                                 | 31:24          | HLA03570 |                                               | 0   | 1   | 0    | 0    | 0   | 0   | 0   | 1     |                                                      |     |      |      |     |     |     |       |                   |  |
| A*31:25                                                 | 31:25          | HLA03769 |                                               | 0   | 0   | 8    | 0    | 0   | 0   | 0   | 8     |                                                      |     | WD   |      |     |     |     | WD    | WD                |  |
| A*31:26                                                 | 31:26          | HLA03920 |                                               | 0   | 0   | 81   | 0    | 0   | 0   | 3   | 84    |                                                      |     | WD   |      |     |     |     | WD    | WD                |  |
| A*31:27                                                 | 31:27          | HLA03925 |                                               | 0   | 0   | 115  | 0    | 0   | 0   | 1   | 116   |                                                      |     | WD   |      |     |     |     | WD    | WD                |  |
| A*31:28                                                 | 31:28          | HLA04418 |                                               | 0   | 0   | 18   | 2    | 0   | 0   | 4   | 24    |                                                      |     | WD   |      |     |     |     | WD    | WD                |  |
| A*31:30                                                 | 31:30          | HLA04746 |                                               | 0   | 0   | 1    | 0    | 3   | 0   | 2   | 6     |                                                      |     |      |      |     |     |     | WD    | WD                |  |
| A*31:31                                                 | 31:31          | HLA04786 |                                               | 0   | 0   | 1    | 0    | 0   | 0   | 0   | 1     |                                                      |     |      |      |     |     |     |       |                   |  |
| A*31:32                                                 | 31:32          | HLA05241 |                                               | 0   | 1   | 0    | 0    | 0   | 0   | 0   | 1     |                                                      |     |      |      |     |     |     |       |                   |  |
| A*31:33                                                 | 31:33          | HLA05250 |                                               | 0   | 1   | 0    | 0    | 0   | 0   | 0   | 1     |                                                      |     |      |      |     |     |     |       |                   |  |
| A*31:35                                                 | 31:35          | HLA05325 |                                               | 0   | 0   | 4    | 0    | 0   | 0   | 0   | 4     |                                                      |     |      |      |     |     |     |       |                   |  |

| Supplemental Table 8: HLA-A Allele Summary <sup>a</sup> |                |          | Allele Count by Population Group <sup>b</sup> |     |     |      |      |     |     |     |       | 3.0.0 CIWD Category by Population Group <sup>c</sup> |     |      |      |     |     |     |       |                   |
|---------------------------------------------------------|----------------|----------|-----------------------------------------------|-----|-----|------|------|-----|-----|-----|-------|------------------------------------------------------|-----|------|------|-----|-----|-----|-------|-------------------|
| Allele                                                  | Genomic Typing | AlleleID | G group                                       | AFA | API | EURO | MENA | HIS | NAM | UNK | Total | AFA                                                  | API | EURO | MENA | HIS | NAM | UNK | Total | Highest Frequency |
| A*31:36                                                 | 31:36          | HLA05345 |                                               | 0   | 1   | 2    | 0    | 9   | 2   | 0   | 14    |                                                      |     |      |      | I   |     |     | WD    | I                 |
| A*31:37                                                 | 31:37          | HLA05346 |                                               | 3   | 0   | 0    | 0    | 0   | 0   | 0   | 3     |                                                      |     |      |      |     |     |     |       |                   |
| A*31:38                                                 | 31:38          | HLA05447 |                                               | 0   | 0   | 7    | 0    | 0   | 0   | 0   | 7     |                                                      |     | WD   |      |     |     |     | WD    | WD                |
| A*31:39                                                 | 31:39          | HLA05459 |                                               | 0   | 0   | 6    | 0    | 0   | 0   | 0   | 6     |                                                      |     | WD   |      |     |     |     | WD    | WD                |
| A*31:40                                                 | 31:40          | HLA05522 |                                               | 0   | 0   | 9    | 0    | 0   | 0   | 19  | 28    |                                                      |     | WD   |      |     |     | I   | WD    | I                 |
| A*31:41                                                 | 31:41          | HLA05655 |                                               | 0   | 1   | 0    | 0    | 3   | 0   | 0   | 4     |                                                      |     |      |      |     |     |     |       |                   |
| A*31:42                                                 | 31:42          | HLA05666 |                                               | 0   | 0   | 0    | 0    | 0   | 0   | 1   | 1     |                                                      |     |      |      |     |     |     |       |                   |
| A*31:43                                                 | 31:43          | HLA05671 |                                               | 0   | 0   | 1    | 0    | 0   | 0   | 2   | 3     |                                                      |     |      |      |     |     |     |       |                   |
| A*31:44                                                 | 31:44          | HLA05682 |                                               | 0   | 0   | 0    | 0    | 0   | 0   | 1   | 1     |                                                      |     |      |      |     |     |     |       |                   |
| A*31:47                                                 | 31:47          | HLA05936 |                                               | 0   | 0   | 3    | 0    | 0   | 0   | 0   | 3     |                                                      |     |      |      |     |     |     |       |                   |
| A*31:51                                                 | 31:51          | HLA06782 |                                               | 1   | 2   | 0    | 0    | 1   | 0   | 0   | 4     |                                                      |     |      |      |     |     |     |       |                   |
| A*31:54                                                 | 31:54          | HLA06837 |                                               | 0   | 0   | 0    | 0    | 3   | 0   | 0   | 3     |                                                      |     |      |      |     |     |     |       |                   |
| A*31:60N                                                | 31:60N         | HLA07522 |                                               | 0   | 0   | 4    | 0    | 0   | 0   | 2   | 6     |                                                      |     |      |      |     |     |     | WD    | WD                |
| A*31:63                                                 | 31:63          | HLA08032 |                                               | 0   | 0   | 1    | 0    | 0   | 0   | 0   | 1     |                                                      |     |      |      |     |     |     |       |                   |
| A*31:64                                                 | 31:64          | HLA08034 |                                               | 0   | 1   | 0    | 0    | 0   | 0   | 0   | 1     |                                                      |     |      |      |     |     |     |       |                   |
| A*31:66                                                 | 31:66          | HLA08093 |                                               | 0   | 0   | 2    | 0    | 0   | 0   | 0   | 2     |                                                      |     |      |      |     |     |     |       |                   |
| A*31:68                                                 | 31:68          | HLA08608 |                                               | 0   | 7   | 0    | 0    | 2   | 0   | 3   | 12    |                                                      | WD  |      |      |     |     |     | WD    | WD                |
| A*31:69                                                 | 31:69          | HLA08609 |                                               | 0   | 0   | 0    | 0    | 0   | 0   | 1   | 1     |                                                      |     |      |      |     |     |     |       |                   |
| A*31:75                                                 | 31:75          | HLA09776 |                                               | 0   | 0   | 1    | 0    | 0   | 0   | 0   | 1     |                                                      |     |      |      |     |     |     |       |                   |
| A*31:77                                                 | 31:77          | HLA09778 |                                               | 1   | 0   | 0    | 0    | 0   | 0   | 0   | 1     |                                                      |     |      |      |     |     |     |       |                   |
| A*31:80                                                 | 31:80          | HLA10373 |                                               | 0   | 0   | 0    | 0    | 1   | 0   | 0   | 1     |                                                      |     |      |      |     |     |     |       |                   |
| A*31:84                                                 | 31:84          | HLA10938 |                                               | 0   | 0   | 2    | 0    | 0   | 0   | 0   | 2     |                                                      |     |      |      |     |     |     |       |                   |
| A*31:85                                                 | 31:85          | HLA10958 |                                               | 1   | 0   | 2    | 0    | 0   | 0   | 0   | 3     |                                                      |     |      |      |     |     |     |       |                   |
| A*31:86                                                 | 31:86          | HLA10959 |                                               | 0   | 2   | 0    | 0    | 0   | 0   | 0   | 2     |                                                      |     |      |      |     |     |     |       |                   |
| A*31:88                                                 | 31:88          | HLA11202 |                                               | 0   | 2   | 1    | 16   | 0   | 0   | 0   | 19    |                                                      |     |      | WD   |     |     |     | WD    | WD                |
| A*31:89                                                 | 31:89          | HLA12099 |                                               | 0   | 2   | 0    | 0    | 0   | 0   | 0   | 2     |                                                      |     |      |      |     |     |     |       |                   |
| A*31:90                                                 | 31:90          | HLA12918 |                                               | 0   | 0   | 0    | 0    | 0   | 0   | 1   | 1     |                                                      |     |      |      |     |     |     |       |                   |
| A*31:96                                                 | 31:96          | HLA13428 |                                               | 0   | 0   | 0    | 0    | 2   | 0   | 0   | 2     |                                                      |     |      |      |     |     |     |       |                   |
| A*31:97                                                 | 31:97          | HLA13372 |                                               | 0   | 0   | 0    | 0    | 1   | 0   | 0   | 1     |                                                      |     |      |      |     |     |     |       |                   |
| A*31:98                                                 | 31:98          | HLA13722 |                                               | 0   | 2   | 0    | 0    | 0   | 0   | 0   | 2     |                                                      |     |      |      |     |     |     |       |                   |

| Supplemental Table 8: HLA-A Allele Summary <sup>a</sup> |                        |          | Allele Count by Population Group <sup>b</sup> |             |              |               |              |              |             |              |               | 3.0.0 CIWD Category by Population Group <sup>c</sup> |          |          |          |          |          |          |          |                   |          |
|---------------------------------------------------------|------------------------|----------|-----------------------------------------------|-------------|--------------|---------------|--------------|--------------|-------------|--------------|---------------|------------------------------------------------------|----------|----------|----------|----------|----------|----------|----------|-------------------|----------|
| Allele                                                  | Genomic Typing         | AlleleID | G group                                       | AFA         | API          | EURO          | MENA         | HIS          | NAM         | UNK          | Total         | AFA                                                  | API      | EURO     | MENA     | HIS      | NAM      | UNK      | Total    | Highest Frequency |          |
| A*31:100                                                | 31:100                 | HLA13943 |                                               | 0           | 0            | 0             | 0            | 1            | 0           | 0            | 1             |                                                      |          |          |          |          |          |          |          |                   |          |
| A*31:101                                                | 31:101                 | HLA13781 |                                               | 0           | 1            | 0             | 0            | 0            | 0           | 0            | 1             |                                                      |          |          |          |          |          |          |          |                   |          |
| A*31:102                                                | 31:102                 | HLA14119 |                                               | 0           | 2            | 0             | 0            | 0            | 0           | 0            | 2             |                                                      |          |          |          |          |          |          |          |                   |          |
| A*31:105                                                | 31:105                 | HLA14424 |                                               | 0           | 2            | 0             | 0            | 0            | 0           | 0            | 2             |                                                      |          |          |          |          |          |          |          |                   |          |
| A*31:109                                                | 31:109                 | HLA14970 |                                               | 0           | 0            | 0             | 0            | 0            | 0           | 2            | 2             |                                                      |          |          |          |          |          |          |          |                   |          |
| A*31:123                                                | 31:123                 | HLA17092 |                                               | 0           | 0            | 0             | 0            | 0            | 0           | 1            | 1             |                                                      |          |          |          |          |          |          |          |                   |          |
| A*31:CODE                                               | 31:CODE                |          |                                               | 323         | 930          | 21289         | 246          | 3646         | 236         | 3436         | 30106         | NA                                                   | NA       | NA       | NA       | NA       | NA       | NA       | NA       | NA                | NA       |
| <b>A*32:01 total</b>                                    | <b>32:01 total</b>     |          |                                               | <b>5608</b> | <b>31160</b> | <b>400758</b> | <b>18470</b> | <b>16586</b> | <b>1641</b> | <b>41000</b> | <b>515223</b> | <b>C</b>                                             | <b>C</b> | <b>C</b> | <b>C</b> | <b>C</b> | <b>C</b> | <b>C</b> | <b>C</b> | <b>C</b>          | <b>C</b> |
| A*32:01                                                 | 32:01                  |          |                                               | 1007        | 1107         | 52176         | 1827         | 2004         | 298         | 5946         | 64365         | C                                                    | C        | C        | C        | C        | C        | C        | C        | C                 | C        |
| A*32:01P                                                | 32:01P                 |          |                                               | 0           | 1            | 717           | 6            | 2            | 0           | 0            | 726           |                                                      |          | I        | WD       |          |          |          | I        | I                 |          |
| <b>A*32:01:01G total</b>                                | <b>32:01:01G total</b> |          |                                               | <b>4601</b> | <b>30050</b> | <b>347797</b> | <b>16635</b> | <b>14574</b> | <b>1341</b> | <b>35051</b> | <b>450049</b> | <b>C</b>                                             | <b>C</b> | <b>C</b> | <b>C</b> | <b>C</b> | <b>C</b> | <b>C</b> | <b>C</b> | <b>C</b>          | <b>C</b> |
| A*32:01:01G                                             | 32:01:01G              |          | 32:01:01G                                     | 3449        | 27917        | 326953        | 16100        | 9695         | 896         | 31671        | 416681        | C                                                    | C        | C        | C        | C        | C        | C        | C        | C                 | C        |
| A*32:01:01                                              | 32:01:01               |          | 32:01:01G                                     | 1105        | 2086         | 19496         | 502          | 4667         | 431         | 3211         | 31498         | C                                                    | C        | C        | C        | C        | C        | C        | C        | C                 | C        |
| A*32:01:01:01                                           | 32:01:01:01            | HLA00101 | 32:01:01G                                     | 45          | 47           | 1334          | 31           | 178          | 12          | 165          | 1812          | C                                                    | I        | C        | WD       | C        | C        | C        | C        | C                 | C        |
| A*32:01:01:02                                           | 32:01:01:02            | HLA16405 | 32:01:01G                                     | 0           | 0            | 0             | 0            | 0            | 0           | 1            | 1             |                                                      |          |          |          |          |          |          |          |                   |          |
| A*32:01:01:03                                           | 32:01:01:03            | HLA16414 | 32:01:01G                                     | 0           | 0            | 1             | 0            | 0            | 0           | 0            | 1             |                                                      |          |          |          |          |          |          |          |                   |          |
| A*32:01:01:04                                           | 32:01:01:04            | HLA16672 | 32:01:01G                                     | 0           | 0            | 1             | 0            | 1            | 0           | 0            | 2             |                                                      |          |          |          |          |          |          |          |                   |          |
| A*32:01:01:05                                           | 32:01:01:05            | HLA17075 | 32:01:01G                                     | 0           | 0            | 2             | 0            | 0            | 0           | 0            | 2             |                                                      |          |          |          |          |          |          |          |                   |          |
| A*32:01:02                                              | 32:01:02               | HLA02879 | 32:01:01G                                     | 2           | 0            | 9             | 0            | 29           | 2           | 3            | 45            |                                                      |          | WD       |          | I        |          |          | WD       | I                 |          |
| A*32:01:23                                              | 32:01:23               | HLA14096 | 32:01:01G                                     | 0           | 0            | 0             | 0            | 4            | 0           | 0            | 4             |                                                      |          |          |          |          |          |          |          |                   |          |
| A*32:53                                                 | 32:53                  | HLA08566 | 32:01:01G                                     | 0           | 0            | 1             | 0            | 0            | 0           | 0            | 1             |                                                      |          |          |          |          |          |          |          |                   |          |
| A*32:54                                                 | 32:54                  | HLA08570 | 32:01:01G                                     | 0           | 0            | 0             | 2            | 0            | 0           | 0            | 2             |                                                      |          |          |          |          |          |          |          |                   |          |
| A*32:01:04                                              | 32:01:04               | HLA04486 |                                               | 0           | 1            | 29            | 0            | 1            | 0           | 1            | 32            |                                                      |          | WD       |          |          |          |          | WD       | WD                |          |
| A*32:01:06                                              | 32:01:06               | HLA05457 |                                               | 0           | 0            | 4             | 0            | 0            | 0           | 0            | 4             |                                                      |          |          |          |          |          |          |          |                   |          |
| A*32:01:08                                              | 32:01:08               | HLA05979 |                                               | 0           | 0            | 3             | 0            | 0            | 0           | 0            | 3             |                                                      |          |          |          |          |          |          |          |                   |          |
| A*32:01:09                                              | 32:01:09               | HLA06335 |                                               | 0           | 0            | 14            | 1            | 1            | 0           | 0            | 16            |                                                      |          | WD       |          |          |          |          | WD       | WD                |          |
| A*32:01:10                                              | 32:01:10               | HLA06539 |                                               | 0           | 0            | 1             | 0            | 0            | 0           | 0            | 1             |                                                      |          |          |          |          |          |          |          |                   |          |
| A*32:01:12                                              | 32:01:12               | HLA07428 |                                               | 0           | 0            | 6             | 0            | 4            | 2           | 0            | 12            |                                                      |          | WD       |          |          |          |          | WD       | WD                |          |
| A*32:01:14                                              | 32:01:14               | HLA08455 |                                               | 0           | 0            | 5             | 1            | 0            | 0           | 1            | 7             |                                                      |          | WD       |          |          |          |          | WD       | WD                |          |
| A*32:01:17                                              | 32:01:17               | HLA11806 |                                               | 0           | 0            | 2             | 0            | 0            | 0           | 0            | 2             |                                                      |          |          |          |          |          |          |          |                   |          |

| Supplemental Table 8: HLA-A Allele Summary <sup>a</sup> |                    |          | Allele Count by Population Group <sup>b</sup> |          |          |          |          |          |          |          |           | 3.0.0 CIWD Category by Population Group <sup>c</sup> |     |      |      |     |     |           |           |                   |
|---------------------------------------------------------|--------------------|----------|-----------------------------------------------|----------|----------|----------|----------|----------|----------|----------|-----------|------------------------------------------------------|-----|------|------|-----|-----|-----------|-----------|-------------------|
| Allele                                                  | Genomic Typing     | AlleleID | G group                                       | AFA      | API      | EURO     | MENA     | HIS      | NAM      | UNK      | Total     | AFA                                                  | API | EURO | MENA | HIS | NAM | UNK       | Total     | Highest Frequency |
| A*32:01:18                                              | 32:01:18           | HLA12249 |                                               | 0        | 0        | 0        | 0        | 0        | 0        | 1        | 1         |                                                      |     |      |      |     |     |           |           |                   |
| A*32:01:19                                              | 32:01:19           | HLA12253 |                                               | 0        | 1        | 0        | 0        | 0        | 0        | 0        | 1         |                                                      |     |      |      |     |     |           |           |                   |
| A*32:01:20                                              | 32:01:20           | HLA12254 |                                               | 0        | 0        | 1        | 0        | 0        | 0        | 0        | 1         |                                                      |     |      |      |     |     |           |           |                   |
| A*32:01:21                                              | 32:01:21           | HLA12557 |                                               | 0        | 0        | 1        | 0        | 0        | 0        | 0        | 1         |                                                      |     |      |      |     |     |           |           |                   |
| A*32:01:24                                              | 32:01:24           | HLA15823 |                                               | 0        | 0        | 2        | 0        | 0        | 0        | 0        | 2         |                                                      |     |      |      |     |     |           |           |                   |
| A*32:02                                                 | 32:02              | HLA00102 |                                               | 0        | 0        | 63       | 2        | 27       | 0        | 18       | 110       |                                                      |     | WD   |      | I   |     | I         | WD        | I                 |
| A*32:03                                                 | 32:03              | HLA00103 |                                               | 0        | 5        | 160      | 1        | 4        | 0        | 11       | 181       |                                                      | WD  | I    |      |     |     | WD        | I         | I                 |
| A*32:04                                                 | 32:04              | HLA01045 |                                               | 0        | 2        | 615      | 4        | 6        | 0        | 64       | 691       |                                                      |     | I    |      | WD  |     | I         | I         | I                 |
| A*32:05                                                 | 32:05              | HLA01207 |                                               | 0        | 6        | 0        | 0        | 0        | 0        | 0        | 6         |                                                      | WD  |      |      |     |     |           | WD        | WD                |
| A*32:06                                                 | 32:06              | HLA01228 |                                               | 0        | 0        | 13       | 0        | 1        | 0        | 0        | 14        |                                                      |     | WD   |      |     |     |           | WD        | WD                |
| A*32:07                                                 | 32:07              | HLA01463 |                                               | 3        | 0        | 61       | 0        | 3        | 0        | 11       | 78        |                                                      |     | WD   |      |     |     | WD        | WD        | WD                |
| A*32:08                                                 | 32:08              | HLA01886 |                                               | 0        | 0        | 52       | 0        | 3        | 0        | 11       | 66        |                                                      |     | WD   |      |     |     | WD        | WD        | WD                |
| A*32:11Q                                                | 32:11Q             | HLA02413 |                                               | 0        | 14       | 0        | 0        | 0        | 0        | 0        | 14        |                                                      | I   |      |      |     |     |           | WD        | I                 |
| A*32:12                                                 | 32:12              | HLA02615 |                                               | 0        | 0        | 5        | 0        | 0        | 0        | 0        | 5         |                                                      |     | WD   |      |     |     |           | WD        | WD                |
| A*32:13                                                 | 32:13              | HLA02649 |                                               | 0        | 0        | 1        | 0        | 0        | 0        | 0        | 1         |                                                      |     |      |      |     |     |           |           |                   |
| A*32:15                                                 | 32:15              | HLA02798 |                                               | 0        | 0        | 1        | 0        | 0        | 0        | 0        | 1         |                                                      |     |      |      |     |     |           |           |                   |
| A*32:16                                                 | 32:16              | HLA03236 |                                               | 0        | 0        | 63       | 0        | 0        | 0        | 1        | 64        |                                                      |     | WD   |      |     |     |           | WD        | WD                |
| A*32:17                                                 | 32:17              | HLA03495 |                                               | 0        | 0        | 85       | 2        | 1        | 0        | 4        | 92        |                                                      |     | WD   |      |     |     |           | WD        | WD                |
| A*32:18                                                 | 32:18              | HLA03571 |                                               | 0        | 0        | 69       | 0        | 0        | 0        | 2        | 71        |                                                      |     | WD   |      |     |     |           | WD        | WD                |
| A*32:19N                                                | 32:19N             | HLA03783 |                                               | 0        | 0        | 1        | 0        | 1        | 0        | 0        | 2         |                                                      |     |      |      |     |     |           |           |                   |
| A*32:21                                                 | 32:21              | HLA04642 |                                               | 1        | 0        | 1        | 0        | 3        | 2        | 0        | 7         |                                                      |     |      |      |     |     |           | WD        | WD                |
| A*32:22                                                 | 32:22              | HLA04749 |                                               | 0        | 0        | 4        | 0        | 0        | 0        | 2        | 6         |                                                      |     |      |      |     |     |           | WD        | WD                |
| A*32:23                                                 | 32:23              | HLA05121 |                                               | 0        | 0        | 1        | 0        | 0        | 0        | 0        | 1         |                                                      |     |      |      |     |     |           |           |                   |
| A*32:24                                                 | 32:24              | HLA05347 |                                               | 0        | 0        | 0        | 0        | 2        | 0        | 0        | 2         |                                                      |     |      |      |     |     |           |           |                   |
| <b>A*32:26 total</b>                                    | <b>32:26 total</b> |          |                                               | <b>1</b> | <b>0</b> | <b>3</b> | <b>0</b> | <b>2</b> | <b>0</b> | <b>6</b> | <b>12</b> |                                                      |     |      |      |     |     | <b>WD</b> | <b>WD</b> | <b>WD</b>         |
| A*32:26                                                 | 32:26              |          |                                               | 1        | 0        | 3        | 0        | 2        | 0        | 3        | 9         |                                                      |     |      |      |     |     |           | WD        | WD                |
| A*32:26:01                                              | 32:26:01           | HLA05430 |                                               | 0        | 0        | 0        | 0        | 0        | 0        | 3        | 3         |                                                      |     |      |      |     |     |           |           |                   |
| A*32:27N                                                | 32:27N             | HLA05632 |                                               | 0        | 0        | 25       | 0        | 0        | 0        | 1        | 26        |                                                      |     | WD   |      |     |     |           | WD        | WD                |
| A*32:28                                                 | 32:28              | HLA05639 |                                               | 0        | 2        | 31       | 0        | 1        | 0        | 2        | 36        |                                                      |     | WD   |      |     |     |           | WD        | WD                |
| A*32:29                                                 | 32:29              | HLA05641 |                                               | 0        | 0        | 1        | 0        | 0        | 0        | 0        | 1         |                                                      |     |      |      |     |     |           |           |                   |



| Supplemental Table 8: HLA-A Allele Summary <sup>a</sup> |                    |          | Allele Count by Population Group <sup>b</sup> |     |     |      |      |     |     |     |       | 3.0.0 CIWD Category by Population Group <sup>c</sup> |     |      |      |     |     |     |       |                   |
|---------------------------------------------------------|--------------------|----------|-----------------------------------------------|-----|-----|------|------|-----|-----|-----|-------|------------------------------------------------------|-----|------|------|-----|-----|-----|-------|-------------------|
| Allele                                                  | Genomic Typing     | AlleleID | G group                                       | AFA | API | EURO | MENA | HIS | NAM | UNK | Total | AFA                                                  | API | EURO | MENA | HIS | NAM | UNK | Total | Highest Frequency |
| <b>A*32:30 total</b>                                    | <b>32:30 total</b> |          |                                               | 0   | 0   | 0    | 0    | 0   | 0   | 1   | 1     |                                                      |     |      |      |     |     |     |       |                   |
| A*32:30                                                 | 32:30              |          |                                               | 0   | 0   | 0    | 0    | 0   | 0   | 1   | 1     |                                                      |     |      |      |     |     |     |       |                   |
| A*32:31                                                 | 32:31              | HLA06007 |                                               | 0   | 0   | 7    | 0    | 0   | 0   | 1   | 8     |                                                      |     | WD   |      |     |     |     | WD    | WD                |
| <b>A*32:33 total</b>                                    | <b>32:33 total</b> |          |                                               | 0   | 0   | 3    | 0    | 0   | 0   | 0   | 3     |                                                      |     |      |      |     |     |     |       |                   |
| A*32:33                                                 | 32:33              |          |                                               | 0   | 0   | 1    | 0    | 0   | 0   | 0   | 1     |                                                      |     |      |      |     |     |     |       |                   |
| A*32:33:01                                              | 32:33:01           | HLA06371 |                                               | 0   | 0   | 2    | 0    | 0   | 0   | 0   | 2     |                                                      |     |      |      |     |     |     |       |                   |
| A*32:36                                                 | 32:36              | HLA06789 |                                               | 0   | 0   | 0    | 1    | 0   | 0   | 0   | 1     |                                                      |     |      |      |     |     |     |       |                   |
| A*32:37                                                 | 32:37              | HLA07185 |                                               | 0   | 0   | 4    | 0    | 0   | 0   | 0   | 4     |                                                      |     |      |      |     |     |     |       |                   |
| A*32:38                                                 | 32:38              | HLA07603 |                                               | 0   | 0   | 1    | 0    | 0   | 0   | 0   | 1     |                                                      |     |      |      |     |     |     |       |                   |
| A*32:39                                                 | 32:39              | HLA07604 |                                               | 0   | 0   | 1    | 0    | 0   | 0   | 0   | 1     |                                                      |     |      |      |     |     |     |       |                   |
| A*32:40                                                 | 32:40              | HLA07606 |                                               | 0   | 0   | 1    | 0    | 0   | 0   | 0   | 1     |                                                      |     |      |      |     |     |     |       |                   |
| A*32:42                                                 | 32:42              | HLA08035 |                                               | 0   | 0   | 1    | 0    | 0   | 0   | 0   | 1     |                                                      |     |      |      |     |     |     |       |                   |
| A*32:44                                                 | 32:44              | HLA08047 |                                               | 0   | 0   | 11   | 0    | 0   | 0   | 2   | 13    |                                                      |     | WD   |      |     |     |     | WD    | WD                |
| A*32:45N                                                | 32:45N             | HLA08048 |                                               | 0   | 0   | 17   | 0    | 0   | 1   | 3   | 21    |                                                      |     | WD   |      |     |     |     | WD    | WD                |
| A*32:47                                                 | 32:47              | HLA08453 |                                               | 0   | 0   | 4    | 0    | 0   | 0   | 1   | 5     |                                                      |     |      |      |     |     |     | WD    | WD                |
| A*32:51                                                 | 32:51              | HLA08485 |                                               | 0   | 0   | 1    | 0    | 1   | 0   | 0   | 2     |                                                      |     |      |      |     |     |     |       |                   |
| A*32:52                                                 | 32:52              | HLA08491 |                                               | 0   | 0   | 4    | 0    | 0   | 0   | 0   | 4     |                                                      |     |      |      |     |     |     |       |                   |
| <b>A*32:55 total</b>                                    | <b>32:55 total</b> |          |                                               | 0   | 1   | 8    | 0    | 0   | 0   | 1   | 10    |                                                      |     | WD   |      |     |     |     | WD    | WD                |
| A*32:55                                                 | 32:55              |          |                                               | 0   | 0   | 2    | 0    | 0   | 0   | 0   | 2     |                                                      |     |      |      |     |     |     |       |                   |
| A*32:55:01                                              | 32:55:01           | HLA08643 |                                               | 0   | 0   | 6    | 0    | 0   | 0   | 1   | 7     |                                                      |     | WD   |      |     |     |     | WD    | WD                |
| A*32:55:02                                              | 32:55:02           | HLA08969 |                                               | 0   | 1   | 0    | 0    | 0   | 0   | 0   | 1     |                                                      |     |      |      |     |     |     |       |                   |
| A*32:58                                                 | 32:58              | HLA09544 |                                               | 0   | 0   | 4    | 0    | 0   | 0   | 0   | 4     |                                                      |     |      |      |     |     |     |       |                   |
| A*32:60                                                 | 32:60              | HLA10391 |                                               | 0   | 0   | 15   | 0    | 0   | 0   | 1   | 16    |                                                      |     | WD   |      |     |     |     | WD    | WD                |
| A*32:62                                                 | 32:62              | HLA10984 |                                               | 0   | 1   | 9    | 0    | 0   | 0   | 0   | 10    |                                                      |     | WD   |      |     |     |     | WD    | WD                |
| A*32:63                                                 | 32:63              | HLA11217 |                                               | 0   | 0   | 0    | 0    | 0   | 0   | 2   | 2     |                                                      |     |      |      |     |     |     |       |                   |
| A*32:64                                                 | 32:64              | HLA11301 |                                               | 0   | 1   | 0    | 0    | 0   | 0   | 0   | 1     |                                                      |     |      |      |     |     |     |       |                   |
| A*32:71                                                 | 32:71              | HLA12970 |                                               | 0   | 0   | 0    | 1    | 0   | 0   | 0   | 1     |                                                      |     |      |      |     |     |     |       |                   |
| A*32:72                                                 | 32:72              | HLA13243 |                                               | 0   | 0   | 1    | 0    | 0   | 0   | 0   | 1     |                                                      |     |      |      |     |     |     |       |                   |
| A*32:73                                                 | 32:73              | HLA13453 |                                               | 0   | 0   | 1    | 0    | 0   | 0   | 0   | 1     |                                                      |     |      |      |     |     |     |       |                   |
| A*32:75                                                 | 32:75              | HLA13848 |                                               | 0   | 0   | 0    | 0    | 0   | 0   | 1   | 1     |                                                      |     |      |      |     |     |     |       |                   |

| Supplemental Table 8: HLA-A Allele Summary <sup>a</sup> |                        |          | Allele Count by Population Group <sup>b</sup> |              |               |              |             |              |             |              |               | 3.0.0 CIWD Category by Population Group <sup>c</sup> |          |          |          |          |          |          |          |                   |
|---------------------------------------------------------|------------------------|----------|-----------------------------------------------|--------------|---------------|--------------|-------------|--------------|-------------|--------------|---------------|------------------------------------------------------|----------|----------|----------|----------|----------|----------|----------|-------------------|
| Allele                                                  | Genomic Typing         | AlleleID | G group                                       | AFA          | API           | EURO         | MENA        | HIS          | NAM         | UNK          | Total         | AFA                                                  | API      | EURO     | MENA     | HIS      | NAM      | UNK      | Total    | Highest Frequency |
| A*32:86                                                 | 32:86                  | HLA15251 |                                               | 0            | 0             | 1            | 0           | 0            | 0           | 0            | 1             |                                                      |          |          |          |          |          |          |          |                   |
| A*32:98                                                 | 32:98                  | HLA16461 |                                               | 0            | 0             | 1            | 0           | 0            | 0           | 0            | 1             |                                                      |          |          |          |          |          |          |          |                   |
| A*32:CODE                                               | 32:CODE                |          |                                               | 398          | 617           | 23076        | 549         | 1790         | 133         | 3283         | 29846         | NA                                                   | NA       | NA       | NA       | NA       | NA       | NA       | NA       | NA                |
| <b>A*33:01 total</b>                                    | <b>33:01 total</b>     |          |                                               | <b>7226</b>  | <b>1202</b>   | <b>78237</b> | <b>5533</b> | <b>12891</b> | <b>1095</b> | <b>14456</b> | <b>120640</b> | <b>C</b>                                             | <b>C</b> | <b>C</b> | <b>C</b> | <b>C</b> | <b>C</b> | <b>C</b> | <b>C</b> | <b>C</b>          |
| A*33:01                                                 | 33:01                  |          |                                               | 813          | 50            | 5776         | 248         | 1291         | 142         | 1012         | 9332          | C                                                    | I        | C        | C        | C        | C        | C        | C        | C                 |
| A*33:01P                                                | 33:01P                 |          |                                               | 0            | 0             | 82           | 1           | 1            | 0           | 1            | 85            |                                                      |          | WD       |          |          |          |          | WD       | WD                |
| <b>A*33:01:01G total</b>                                | <b>33:01:01G total</b> |          |                                               | <b>6412</b>  | <b>1152</b>   | <b>72361</b> | <b>5282</b> | <b>11599</b> | <b>953</b>  | <b>13441</b> | <b>111200</b> | <b>C</b>                                             | <b>C</b> | <b>C</b> | <b>C</b> | <b>C</b> | <b>C</b> | <b>C</b> | <b>C</b> | <b>C</b>          |
| A*33:01:01G                                             | 33:01:01G              |          | 33:01:01G                                     | 1804         | 490           | 22459        | 1363        | 3654         | 228         | 5580         | 35578         | C                                                    | C        | C        | C        | C        | C        | C        | C        | C                 |
| A*33:01:01                                              | 33:01:01               |          | 33:01:01G                                     | 4533         | 657           | 49581        | 3894        | 7750         | 716         | 7788         | 74919         | C                                                    | C        | C        | C        | C        | C        | C        | C        | C                 |
| A*33:01:01:01                                           | 33:01:01:01            | HLA00104 | 33:01:01G                                     | 70           | 5             | 310          | 25          | 179          | 9           | 73           | 671           | C                                                    | WD       | I        | WD       | C        | C        | I        | I        | C                 |
| A*33:01:01:02                                           | 33:01:01:02            | HLA16434 | 33:01:01G                                     | 0            | 0             | 11           | 0           | 16           | 0           | 0            | 27            |                                                      |          | WD       |          | I        |          |          | WD       | I                 |
| A*33:01:09                                              | 33:01:09               | HLA15594 | 33:01:01G                                     | 5            | 0             | 0            | 0           | 0            | 0           | 0            | 5             | WD                                                   |          |          |          |          |          |          | WD       | WD                |
| A*33:01:02                                              | 33:01:02               | HLA03885 |                                               | 0            | 0             | 9            | 1           | 0            | 0           | 0            | 10            |                                                      |          | WD       |          |          |          |          | WD       | WD                |
| A*33:01:03                                              | 33:01:03               | HLA03926 |                                               | 0            | 0             | 9            | 0           | 0            | 0           | 2            | 11            |                                                      |          | WD       |          |          |          |          | WD       | WD                |
| A*33:01:05                                              | 33:01:05               | HLA05660 |                                               | 0            | 0             | 0            | 1           | 0            | 0           | 0            | 1             |                                                      |          |          |          |          |          |          |          |                   |
| A*33:01:07                                              | 33:01:07               | HLA08480 |                                               | 1            | 0             | 0            | 0           | 0            | 0           | 0            | 1             |                                                      |          |          |          |          |          |          |          |                   |
| <b>A*33:03 total</b>                                    | <b>33:03 total</b>     |          |                                               | <b>17720</b> | <b>130258</b> | <b>44398</b> | <b>6571</b> | <b>4432</b>  | <b>983</b>  | <b>14607</b> | <b>218969</b> | <b>C</b>                                             | <b>C</b> | <b>C</b> | <b>C</b> | <b>C</b> | <b>C</b> | <b>C</b> | <b>C</b> | <b>C</b>          |
| A*33:03                                                 | 33:03                  |          |                                               | 8            | 9             | 304          | 0           | 1            | 0           | 31           | 353           | WD                                                   | WD       | I        |          |          |          | I        | I        | I                 |
| A*33:03P                                                | 33:03P                 |          |                                               | 3            | 2             | 88           | 3           | 2            | 0           | 0            | 98            |                                                      |          | WD       |          |          |          |          | WD       | WD                |
| <b>A*33:03:01G total</b>                                | <b>33:03:01G total</b> |          |                                               | <b>17699</b> | <b>130197</b> | <b>44003</b> | <b>6566</b> | <b>4429</b>  | <b>983</b>  | <b>14574</b> | <b>218451</b> | <b>C</b>                                             | <b>C</b> | <b>C</b> | <b>C</b> | <b>C</b> | <b>C</b> | <b>C</b> | <b>C</b> | <b>C</b>          |
| A*33:03:01G                                             | 33:03:01G              |          | 33:03:01G                                     | 13813        | 118340        | 42080        | 6344        | 3165         | 727         | 11932        | 196401        | C                                                    | C        | C        | C        | C        | C        | C        | C        | C                 |
| A*33:03:01                                              | 33:03:01               |          | 33:03:01G                                     | 3884         | 11838         | 1923         | 221         | 1264         | 256         | 2642         | 22028         | C                                                    | C        | C        | C        | C        | C        | C        | C        | C                 |
| A*33:15                                                 | 33:15                  | HLA03246 | 33:03:01G                                     | 1            | 0             | 0            | 0           | 0            | 0           | 0            | 1             |                                                      |          |          |          |          |          |          |          |                   |
| A*33:25                                                 | 33:25                  | HLA03915 | 33:03:01G                                     | 1            | 17            | 0            | 0           | 0            | 0           | 0            | 18            |                                                      | I        |          |          |          |          |          | WD       | I                 |
| A*33:44                                                 | 33:44                  | HLA06372 | 33:03:01G                                     | 0            | 1             | 0            | 0           | 0            | 0           | 0            | 1             |                                                      |          |          |          |          |          |          |          |                   |
| A*33:73N                                                | 33:73N                 | HLA10121 | 33:03:01G                                     | 0            | 1             | 0            | 1           | 0            | 0           | 0            | 2             |                                                      |          |          |          |          |          |          |          |                   |
| A*33:03:05                                              | 33:03:05               | HLA04723 |                                               | 1            | 0             | 0            | 2           | 0            | 0           | 0            | 3             |                                                      |          |          |          |          |          |          |          |                   |
| A*33:03:07                                              | 33:03:07               | HLA06198 |                                               | 0            | 35            | 2            | 1           | 0            | 0           | 0            | 38            |                                                      | I        |          |          |          |          |          | WD       | I                 |
| A*33:03:08                                              | 33:03:08               | HLA06204 |                                               | 3            | 1             | 1            | 0           | 0            | 0           | 0            | 5             |                                                      |          |          |          |          |          |          | WD       | WD                |
| A*33:03:09                                              | 33:03:09               | HLA07284 |                                               | 0            | 0             | 0            | 0           | 0            | 0           | 1            | 1             |                                                      |          |          |          |          |          |          |          |                   |

| Supplemental Table 8: HLA-A Allele Summary <sup>a</sup> |                    |          | Allele Count by Population Group <sup>b</sup> |          |          |          |          |          |          |          |          | 3.0.0 CIWD Category by Population Group <sup>c</sup> |     |      |      |     |     |     |       |                   |  |
|---------------------------------------------------------|--------------------|----------|-----------------------------------------------|----------|----------|----------|----------|----------|----------|----------|----------|------------------------------------------------------|-----|------|------|-----|-----|-----|-------|-------------------|--|
| Allele                                                  | Genomic Typing     | AlleleID | G group                                       | AFA      | API      | EURO     | MENA     | HIS      | NAM      | UNK      | Total    | AFA                                                  | API | EURO | MENA | HIS | NAM | UNK | Total | Highest Frequency |  |
| A*33:03:10                                              | 33:03:10           | HLA07523 |                                               | 5        | 1        | 0        | 0        | 0        | 0        | 0        | 6        | WD                                                   |     |      |      |     |     |     | WD    | WD                |  |
| A*33:03:11                                              | 33:03:11           | HLA08599 |                                               | 0        | 2        | 0        | 0        | 0        | 0        | 0        | 2        |                                                      |     |      |      |     |     |     |       |                   |  |
| A*33:03:16                                              | 33:03:16           | HLA10375 |                                               | 0        | 8        | 0        | 0        | 0        | 0        | 0        | 8        |                                                      | WD  |      |      |     |     |     | WD    | WD                |  |
| A*33:03:25                                              | 33:03:25           | HLA10962 |                                               | 0        | 2        | 0        | 0        | 0        | 0        | 0        | 2        |                                                      |     |      |      |     |     |     |       |                   |  |
| A*33:03:26                                              | 33:03:26           | HLA11632 |                                               | 0        | 1        | 0        | 0        | 0        | 0        | 0        | 1        |                                                      |     |      |      |     |     |     |       |                   |  |
| A*33:03:27                                              | 33:03:27           | HLA12100 |                                               | 0        | 1        | 0        | 0        | 0        | 0        | 0        | 1        |                                                      |     |      |      |     |     |     |       |                   |  |
| A*33:03:28                                              | 33:03:28           | HLA12620 |                                               | 0        | 0        | 0        | 0        | 0        | 0        | 1        | 1        |                                                      |     |      |      |     |     |     |       |                   |  |
| A*33:03:33                                              | 33:03:33           | HLA18001 |                                               | 1        | 0        | 0        | 0        | 0        | 0        | 0        | 1        |                                                      |     |      |      |     |     |     |       |                   |  |
| A*33:04                                                 | 33:04              | HLA00107 |                                               | 0        | 0        | 24       | 1        | 5        | 0        | 14       | 44       |                                                      |     | WD   |      | WD  |     | I   | WD    | I                 |  |
| A*33:05                                                 | 33:05              | HLA00971 |                                               | 43       | 19       | 2700     | 75       | 78       | 8        | 244      | 3167     | C                                                    | I   | C    | C    | C   | C   | C   | C     | C                 |  |
| A*33:06                                                 | 33:06              | HLA01318 |                                               | 3        | 0        | 0        | 0        | 1        | 0        | 0        | 4        |                                                      |     |      |      |     |     |     |       |                   |  |
| A*33:07                                                 | 33:07              | HLA01704 |                                               | 2        | 0        | 2        | 0        | 0        | 0        | 0        | 4        |                                                      |     |      |      |     |     |     |       |                   |  |
| A*33:08                                                 | 33:08              | HLA02250 |                                               | 0        | 2        | 1        | 0        | 1        | 1        | 0        | 5        |                                                      |     |      |      |     |     |     | WD    | WD                |  |
| A*33:09                                                 | 33:09              | HLA02739 |                                               | 0        | 0        | 68       | 0        | 1        | 0        | 0        | 69       |                                                      |     | WD   |      |     |     |     | WD    | WD                |  |
| A*33:10                                                 | 33:10              | HLA02807 |                                               | 0        | 29       | 0        | 1        | 0        | 0        | 0        | 30       |                                                      | I   |      |      |     |     |     | WD    | I                 |  |
| A*33:11                                                 | 33:11              | HLA02918 |                                               | 2        | 3        | 0        | 0        | 0        | 0        | 0        | 5        |                                                      |     |      |      |     |     |     | WD    | WD                |  |
| A*33:12                                                 | 33:12              | HLA02959 |                                               | 0        | 0        | 46       | 0        | 1        | 1        | 3        | 51       |                                                      |     | WD   |      |     |     |     | WD    | WD                |  |
| A*33:13                                                 | 33:13              | HLA02981 |                                               | 0        | 5        | 0        | 0        | 0        | 0        | 0        | 5        |                                                      | WD  |      |      |     |     |     | WD    | WD                |  |
| A*33:16                                                 | 33:16              | HLA03286 |                                               | 0        | 0        | 0        | 0        | 7        | 0        | 0        | 7        |                                                      |     |      |      | WD  |     |     | WD    | WD                |  |
| <b>A*33:18 total</b>                                    | <b>33:18 total</b> |          |                                               | <b>0</b> | <b>0</b> | <b>0</b> | <b>1</b> | <b>0</b> | <b>0</b> | <b>0</b> | <b>1</b> |                                                      |     |      |      |     |     |     |       |                   |  |
| A*33:18:01                                              | 33:18:01           | HLA03349 |                                               | 0        | 0        | 0        | 1        | 0        | 0        | 0        | 1        |                                                      |     |      |      |     |     |     |       |                   |  |
| A*33:19                                                 | 33:19              | HLA03388 |                                               | 0        | 0        | 0        | 0        | 0        | 0        | 1        | 1        |                                                      |     |      |      |     |     |     |       |                   |  |
| A*33:23                                                 | 33:23              | HLA03566 |                                               | 0        | 0        | 1        | 0        | 0        | 0        | 0        | 1        |                                                      |     |      |      |     |     |     |       |                   |  |
| A*33:24                                                 | 33:24              | HLA03817 |                                               | 0        | 1        | 0        | 0        | 0        | 0        | 0        | 1        |                                                      |     |      |      |     |     |     |       |                   |  |
| A*33:26                                                 | 33:26              | HLA03921 |                                               | 0        | 0        | 2        | 48       | 0        | 0        | 2        | 52       |                                                      |     |      | C    |     |     |     | WD    | C                 |  |
| A*33:27                                                 | 33:27              | HLA04057 |                                               | 0        | 1        | 74       | 0        | 3        | 0        | 1        | 79       |                                                      |     | WD   |      |     |     |     | WD    | WD                |  |
| A*33:33                                                 | 33:33              | HLA05633 |                                               | 0        | 0        | 0        | 6        | 0        | 0        | 0        | 6        |                                                      |     |      | WD   |     |     |     | WD    | WD                |  |
| A*33:34                                                 | 33:34              | HLA05656 |                                               | 0        | 0        | 10       | 0        | 0        | 0        | 0        | 10       |                                                      |     | WD   |      |     |     |     | WD    | WD                |  |
| A*33:36                                                 | 33:36              | HLA05965 |                                               | 2        | 0        | 0        | 0        | 0        | 0        | 0        | 2        |                                                      |     |      |      |     |     |     |       |                   |  |
| A*33:37                                                 | 33:37              | HLA06011 |                                               | 0        | 0        | 3        | 0        | 0        | 0        | 0        | 3        |                                                      |     |      |      |     |     |     |       |                   |  |

| Supplemental Table 8: HLA-A Allele Summary <sup>a</sup> |                |          | Allele Count by Population Group <sup>b</sup> |     |     |      |      |     |     |     |       | 3.0.0 CIWD Category by Population Group <sup>c</sup> |     |      |      |     |     |     |       |                   |    |
|---------------------------------------------------------|----------------|----------|-----------------------------------------------|-----|-----|------|------|-----|-----|-----|-------|------------------------------------------------------|-----|------|------|-----|-----|-----|-------|-------------------|----|
| Allele                                                  | Genomic Typing | AlleleID | G group                                       | AFA | API | EURO | MENA | HIS | NAM | UNK | Total | AFA                                                  | API | EURO | MENA | HIS | NAM | UNK | Total | Highest Frequency |    |
| A*33:42                                                 | 33:42          | HLA06189 |                                               | 0   | 4   | 0    | 0    | 0   | 0   | 0   | 4     |                                                      |     |      |      |     |     |     |       |                   |    |
| A*33:48                                                 | 33:48          | HLA06901 |                                               | 0   | 13  | 0    | 0    | 0   | 0   | 0   | 13    |                                                      | I   |      |      |     |     |     | WD    |                   | I  |
| A*33:50                                                 | 33:50          | HLA07041 |                                               | 0   | 0   | 2    | 0    | 0   | 0   | 0   | 2     |                                                      |     |      |      |     |     |     |       |                   |    |
| A*33:51                                                 | 33:51          | HLA07043 |                                               | 0   | 1   | 0    | 0    | 0   | 0   | 0   | 1     |                                                      |     |      |      |     |     |     |       |                   |    |
| A*33:52                                                 | 33:52          | HLA07293 |                                               | 0   | 1   | 0    | 0    | 0   | 0   | 1   | 2     |                                                      |     |      |      |     |     |     |       |                   |    |
| A*33:54                                                 | 33:54          | HLA07391 |                                               | 0   | 1   | 0    | 1    | 0   | 0   | 0   | 2     |                                                      |     |      |      |     |     |     |       |                   |    |
| A*33:55                                                 | 33:55          | HLA07524 |                                               | 0   | 7   | 0    | 0    | 0   | 0   | 0   | 7     |                                                      | WD  |      |      |     |     |     | WD    |                   | WD |
| A*33:58                                                 | 33:58          | HLA07567 |                                               | 0   | 2   | 0    | 0    | 0   | 0   | 0   | 2     |                                                      |     |      |      |     |     |     |       |                   |    |
| A*33:59                                                 | 33:59          | HLA07795 |                                               | 0   | 0   | 1    | 0    | 0   | 0   | 0   | 1     |                                                      |     |      |      |     |     |     |       |                   |    |
| A*33:60                                                 | 33:60          | HLA08042 |                                               | 0   | 0   | 6    | 0    | 0   | 0   | 0   | 6     |                                                      |     | WD   |      |     |     |     | WD    |                   | WD |
| A*33:63                                                 | 33:63          | HLA08611 |                                               | 1   | 0   | 0    | 0    | 0   | 0   | 1   | 2     |                                                      |     |      |      |     |     |     |       |                   |    |
| A*33:64                                                 | 33:64          | HLA08612 |                                               | 0   | 0   | 10   | 0    | 0   | 0   | 0   | 10    |                                                      |     | WD   |      |     |     |     | WD    |                   | WD |
| A*33:65                                                 | 33:65          | HLA08971 |                                               | 0   | 17  | 0    | 0    | 0   | 0   | 0   | 17    |                                                      | I   |      |      |     |     |     | WD    |                   | I  |
| A*33:68                                                 | 33:68          | HLA09412 |                                               | 0   | 0   | 0    | 0    | 0   | 0   | 1   | 1     |                                                      |     |      |      |     |     |     |       |                   |    |
| A*33:70                                                 | 33:70          | HLA09522 |                                               | 0   | 2   | 0    | 0    | 0   | 0   | 0   | 2     |                                                      |     |      |      |     |     |     |       |                   |    |
| A*33:71                                                 | 33:71          | HLA09775 |                                               | 0   | 2   | 0    | 0    | 0   | 0   | 0   | 2     |                                                      |     |      |      |     |     |     |       |                   |    |
| A*33:72                                                 | 33:72          | HLA09920 |                                               | 0   | 1   | 0    | 0    | 0   | 0   | 0   | 1     |                                                      |     |      |      |     |     |     |       |                   |    |
| A*33:80N                                                | 33:80N         | HLA10850 |                                               | 0   | 1   | 0    | 0    | 0   | 0   | 0   | 1     |                                                      |     |      |      |     |     |     |       |                   |    |
| A*33:81                                                 | 33:81          | HLA10851 |                                               | 0   | 0   | 2    | 0    | 0   | 0   | 2   | 4     |                                                      |     |      |      |     |     |     |       |                   |    |
| A*33:86                                                 | 33:86          | HLA10956 |                                               | 0   | 2   | 0    | 0    | 0   | 0   | 0   | 2     |                                                      |     |      |      |     |     |     |       |                   |    |
| A*33:89                                                 | 33:89          | HLA11778 |                                               | 0   | 0   | 1    | 0    | 0   | 0   | 0   | 1     |                                                      |     |      |      |     |     |     |       |                   |    |
| A*33:93                                                 | 33:93          | HLA12101 |                                               | 0   | 2   | 0    | 0    | 0   | 0   | 0   | 2     |                                                      |     |      |      |     |     |     |       |                   |    |
| A*33:94                                                 | 33:94          | HLA12240 |                                               | 0   | 1   | 0    | 0    | 0   | 0   | 0   | 1     |                                                      |     |      |      |     |     |     |       |                   |    |
| A*33:96N                                                | 33:96N         | HLA12924 |                                               | 0   | 1   | 0    | 0    | 0   | 0   | 0   | 1     |                                                      |     |      |      |     |     |     |       |                   |    |
| A*33:98                                                 | 33:98          | HLA13429 |                                               | 0   | 1   | 0    | 0    | 0   | 0   | 0   | 1     |                                                      |     |      |      |     |     |     |       |                   |    |
| A*33:99                                                 | 33:99          | HLA13433 |                                               | 0   | 1   | 0    | 0    | 0   | 0   | 0   | 1     |                                                      |     |      |      |     |     |     |       |                   |    |
| A*33:100                                                | 33:100         | HLA13720 |                                               | 0   | 1   | 0    | 0    | 0   | 0   | 0   | 1     |                                                      |     |      |      |     |     |     |       |                   |    |
| A*33:102                                                | 33:102         | HLA13629 |                                               | 0   | 1   | 0    | 0    | 0   | 0   | 0   | 1     |                                                      |     |      |      |     |     |     |       |                   |    |
| A*33:112                                                | 33:112         | HLA15223 |                                               | 0   | 2   | 0    | 0    | 0   | 0   | 0   | 2     |                                                      |     |      |      |     |     |     |       |                   |    |
| A*33:113                                                | 33:113         | HLA15224 |                                               | 0   | 1   | 0    | 0    | 0   | 0   | 0   | 1     |                                                      |     |      |      |     |     |     |       |                   |    |

| Supplemental Table 8: HLA-A Allele Summary <sup>a</sup> |                        |          | Allele Count by Population Group <sup>b</sup> |              |             |             |            |             |            |             |              | 3.0.0 CIWD Category by Population Group <sup>c</sup> |          |          |           |          |          |          |          |                   |
|---------------------------------------------------------|------------------------|----------|-----------------------------------------------|--------------|-------------|-------------|------------|-------------|------------|-------------|--------------|------------------------------------------------------|----------|----------|-----------|----------|----------|----------|----------|-------------------|
| Allele                                                  | Genomic Typing         | AlleleID | G group                                       | AFA          | API         | EURO        | MENA       | HIS         | NAM        | UNK         | Total        | AFA                                                  | API      | EURO     | MENA      | HIS      | NAM      | UNK      | Total    | Highest Frequency |
| A*33:123N                                               | 33:123N                | HLA16215 |                                               | 3            | 0           | 0           | 0          | 0           | 0          | 0           | 3            |                                                      |          |          |           |          |          |          |          |                   |
| A*33:127                                                | 33:127                 | HLA16635 |                                               | 0            | 0           | 0           | 0          | 0           | 0          | 1           | 1            |                                                      |          |          |           |          |          |          |          |                   |
| A*33:CODE                                               | 33:CODE                |          |                                               | 1589         | 2719        | 9967        | 315        | 1581        | 155        | 3726        | 20052        | NA                                                   | NA       | NA       | NA        | NA       | NA       | NA       | NA       | NA                |
| <b>A*34:01 total</b>                                    | <b>34:01 total</b>     |          |                                               | <b>20</b>    | <b>9387</b> | <b>476</b>  | <b>36</b>  | <b>139</b>  | <b>11</b>  | <b>3075</b> | <b>13144</b> | <b>WD</b>                                            | <b>C</b> | <b>I</b> | <b>WD</b> | <b>C</b> | <b>C</b> | <b>C</b> | <b>C</b> | <b>C</b>          |
| A*34:01                                                 | 34:01                  |          |                                               | 3            | 532         | 24          | 0          | 15          | 0          | 180         | 754          |                                                      | C        | WD       |           | I        |          | C        | I        | C                 |
| <b>A*34:01:01G total</b>                                | <b>34:01:01G total</b> |          |                                               | <b>17</b>    | <b>8855</b> | <b>452</b>  | <b>36</b>  | <b>124</b>  | <b>11</b>  | <b>2895</b> | <b>12390</b> | <b>WD</b>                                            | <b>C</b> | <b>I</b> | <b>WD</b> | <b>C</b> | <b>C</b> | <b>C</b> | <b>C</b> | <b>C</b>          |
| A*34:01:01                                              | 34:01:01               | HLA00108 | 34:01:01G                                     | 17           | 8855        | 452         | 36         | 124         | 11         | 2895        | 12390        | WD                                                   | C        | I        | WD        | C        | C        | C        | C        | C                 |
| <b>A*34:02 total</b>                                    | <b>34:02 total</b>     |          |                                               | <b>11905</b> | <b>78</b>   | <b>7050</b> | <b>651</b> | <b>2319</b> | <b>336</b> | <b>3691</b> | <b>26030</b> | <b>C</b>                                             | <b>I</b> | <b>C</b> | <b>C</b>  | <b>C</b> | <b>C</b> | <b>C</b> | <b>C</b> | <b>C</b>          |
| A*34:02                                                 | 34:02                  |          |                                               | 778          | 6           | 536         | 34         | 282         | 24         | 215         | 1875         | C                                                    | WD       | I        | WD        | C        | C        | C        | C        | C                 |
| A*34:02P                                                | 34:02P                 |          |                                               | 0            | 0           | 1           | 0          | 0           | 0          | 0           | 1            |                                                      |          |          |           |          |          |          |          |                   |
| A*34:02:01                                              | 34:02:01               | HLA00109 |                                               | 11125        | 72          | 6494        | 617        | 2037        | 312        | 3468        | 24125        | C                                                    | I        | C        | C         | C        | C        | C        | C        | C                 |
| A*34:02:02                                              | 34:02:02               | HLA05942 |                                               | 1            | 0           | 0           | 0          | 0           | 0          | 1           | 2            |                                                      |          |          |           |          |          |          |          |                   |
| A*34:02:03                                              | 34:02:03               | HLA07580 |                                               | 0            | 0           | 19          | 0          | 0           | 0          | 7           | 26           |                                                      |          | WD       |           |          |          | WD       | WD       | WD                |
| A*34:02:04                                              | 34:02:04               | HLA11407 |                                               | 1            | 0           | 0           | 0          | 0           | 0          | 0           | 1            |                                                      |          |          |           |          |          |          |          |                   |
| A*34:03                                                 | 34:03                  | HLA01248 |                                               | 3            | 0           | 0           | 0          | 0           | 0          | 1           | 4            |                                                      |          |          |           |          |          |          |          |                   |
| A*34:04                                                 | 34:04                  | HLA01320 |                                               | 1            | 0           | 6           | 0          | 0           | 0          | 0           | 7            |                                                      |          | WD       |           |          |          |          | WD       | WD                |
| A*34:05                                                 | 34:05                  | HLA01675 |                                               | 1            | 391         | 47          | 4          | 27          | 3          | 157         | 630          |                                                      | C        | WD       |           | I        |          | C        | I        | C                 |
| A*34:06                                                 | 34:06                  | HLA01904 |                                               | 0            | 0           | 5           | 0          | 0           | 0          | 1           | 6            |                                                      |          | WD       |           |          |          |          | WD       | WD                |
| A*34:07                                                 | 34:07                  | HLA02363 |                                               | 5            | 0           | 0           | 0          | 1           | 0          | 2           | 8            | WD                                                   |          |          |           |          |          |          | WD       | WD                |
| A*34:08                                                 | 34:08                  | HLA02502 |                                               | 0            | 0           | 4           | 0          | 0           | 0          | 1           | 5            |                                                      |          |          |           |          |          |          | WD       | WD                |
| A*34:09                                                 | 34:09                  | HLA05637 |                                               | 0            | 0           | 1           | 0          | 0           | 0          | 0           | 1            |                                                      |          |          |           |          |          |          |          |                   |
| A*34:10N                                                | 34:10N                 | HLA08617 |                                               | 5            | 0           | 0           | 0          | 0           | 0          | 2           | 7            | WD                                                   |          |          |           |          |          |          | WD       | WD                |
| A*34:11                                                 | 34:11                  | HLA09336 |                                               | 0            | 2           | 0           | 0          | 0           | 0          | 0           | 2            |                                                      |          |          |           |          |          |          |          |                   |
| A*34:12                                                 | 34:12                  | HLA12455 |                                               | 0            | 0           | 0           | 0          | 0           | 0          | 1           | 1            |                                                      |          |          |           |          |          |          |          |                   |
| A*34:13                                                 | 34:13                  | HLA13837 |                                               | 0            | 0           | 0           | 0          | 1           | 0          | 0           | 1            |                                                      |          |          |           |          |          |          |          |                   |
| A*34:14                                                 | 34:14                  | HLA13996 |                                               | 0            | 1           | 0           | 0          | 0           | 0          | 1           | 2            |                                                      |          |          |           |          |          |          |          |                   |
| A*34:17                                                 | 34:17                  | HLA15732 |                                               | 0            | 1           | 0           | 0          | 0           | 0          | 0           | 1            |                                                      |          |          |           |          |          |          |          |                   |
| A*34:CODE                                               | 34:CODE                |          |                                               | 540          | 9           | 496         | 12         | 193         | 20         | 230         | 1500         | NA                                                   | NA       | NA       | NA        | NA       | NA       | NA       | NA       | NA                |
| A*36:01                                                 | 36:01                  | HLA00110 |                                               | 10464        | 52          | 871         | 245        | 1317        | 243        | 2338        | 15530        | C                                                    | I        | I        | C         | C        | C        | C        | C        | C                 |
| A*36:02                                                 | 36:02                  | HLA01290 |                                               | 1            | 0           | 4           | 0          | 0           | 0          | 1           | 6            |                                                      |          |          |           |          |          |          | WD       | WD                |

| Supplemental Table 8: HLA-A Allele Summary <sup>a</sup> |                        |          | Allele Count by Population Group <sup>b</sup> |             |            |              |             |             |            |             |              | 3.0.0 CIWD Category by Population Group <sup>c</sup> |          |           |           |          |          |          |          |                   |
|---------------------------------------------------------|------------------------|----------|-----------------------------------------------|-------------|------------|--------------|-------------|-------------|------------|-------------|--------------|------------------------------------------------------|----------|-----------|-----------|----------|----------|----------|----------|-------------------|
| Allele                                                  | Genomic Typing         | AlleleID | G group                                       | AFA         | API        | EURO         | MENA        | HIS         | NAM        | UNK         | Total        | AFA                                                  | API      | EURO      | MENA      | HIS      | NAM      | UNK      | Total    | Highest Frequency |
| A*36:03                                                 | 36:03                  | HLA01497 |                                               | 62          | 1          | 4            | 36          | 7           | 2          | 82          | 194          | C                                                    |          |           | WD        | WD       |          | I        | I        | C                 |
| A*36:04                                                 | 36:04                  | HLA01631 |                                               | 0           | 0          | 59           | 1           | 0           | 0          | 23          | 83           |                                                      |          | WD        |           |          |          | I        | WD       | I                 |
| A*36:05                                                 | 36:05                  | HLA04652 |                                               | 2           | 0          | 0            | 0           | 0           | 0          | 0           | 2            |                                                      |          |           |           |          |          |          |          |                   |
| A*36:CODE                                               | 36:CODE                |          |                                               | 125         | 0          | 60           | 7           | 29          | 5          | 57          | 283          | NA                                                   | NA       | NA        | NA        | NA       | NA       | NA       | NA       | NA                |
| A*43:01                                                 | 43:01                  | HLA00111 |                                               | 52          | 6          | 15           | 186         | 5           | 0          | 19          | 283          | C                                                    | WD       | WD        | C         | WD       |          | I        | I        | C                 |
| <b>A*66:01 total</b>                                    | <b>66:01 total</b>     |          |                                               | <b>5547</b> | <b>609</b> | <b>54312</b> | <b>2367</b> | <b>3923</b> | <b>387</b> | <b>7452</b> | <b>74597</b> | <b>C</b>                                             | <b>C</b> | <b>C</b>  | <b>C</b>  | <b>C</b> | <b>C</b> | <b>C</b> | <b>C</b> | <b>C</b>          |
| A*66:01                                                 | 66:01                  |          |                                               | 2           | 0          | 387          | 3           | 1           | 0          | 29          | 422          |                                                      |          | I         |           |          |          | I        | I        | I                 |
| A*66:01P                                                | 66:01P                 |          |                                               | 0           | 0          | 82           | 0           | 0           | 0          | 2           | 84           |                                                      |          | WD        |           |          |          |          | WD       | WD                |
| <b>A*66:01:01G total</b>                                | <b>66:01:01G total</b> |          |                                               | <b>5545</b> | <b>609</b> | <b>53843</b> | <b>2364</b> | <b>3922</b> | <b>387</b> | <b>7421</b> | <b>74091</b> | <b>C</b>                                             | <b>C</b> | <b>C</b>  | <b>C</b>  | <b>C</b> | <b>C</b> | <b>C</b> | <b>C</b> | <b>C</b>          |
| A*66:01:01G                                             | 66:01:01G              |          | 66:01:01G                                     | 4379        | 579        | 51357        | 2271        | 2793        | 268        | 6739        | 68386        | C                                                    | C        | C         | C         | C        | C        | C        | C        | C                 |
| A*66:01:01                                              | 66:01:01               |          | 66:01:01G                                     | 1111        | 29         | 2320         | 81          | 1082        | 114        | 645         | 5382         | C                                                    | I        | C         | C         | C        | C        | C        | C        | C                 |
| A*66:01:01:01                                           | 66:01:01:01            | HLA00112 | 66:01:01G                                     | 55          | 1          | 157          | 12          | 47          | 5          | 36          | 313          | C                                                    |          | I         | WD        | I        | WD       | I        | I        | C                 |
| A*66:17                                                 | 66:17                  | HLA08116 | 66:01:01G                                     | 0           | 0          | 9            | 0           | 0           | 0          | 1           | 10           |                                                      |          | WD        |           |          |          |          | WD       | WD                |
| A*66:02                                                 | 66:02                  | HLA00113 |                                               | 3208        | 9          | 194          | 9           | 343         | 46         | 694         | 4503         | C                                                    | WD       | I         | WD        | C        | C        | C        | C        | C                 |
| <b>A*66:03 total</b>                                    | <b>66:03 total</b>     |          |                                               | <b>665</b>  | <b>2</b>   | <b>76</b>    | <b>21</b>   | <b>113</b>  | <b>11</b>  | <b>155</b>  | <b>1043</b>  | <b>C</b>                                             |          | <b>WD</b> | <b>WD</b> | <b>C</b> | <b>C</b> | <b>C</b> | <b>I</b> | <b>C</b>          |
| <b>A*66:03:01G total</b>                                | <b>66:03:01G total</b> |          |                                               | <b>665</b>  | <b>2</b>   | <b>76</b>    | <b>21</b>   | <b>113</b>  | <b>11</b>  | <b>155</b>  | <b>1043</b>  | <b>C</b>                                             |          | <b>WD</b> | <b>WD</b> | <b>C</b> | <b>C</b> | <b>C</b> | <b>I</b> | <b>C</b>          |
| A*66:03                                                 | 66:03                  |          |                                               | 658         | 2          | 74           | 21          | 112         | 11         | 155         | 1033         | C                                                    |          | WD        | WD        | C        | C        | C        | I        | C                 |
| A*66:03:01G                                             | 66:03:01G              |          | 66:03:01G                                     | 7           | 0          | 2            | 0           | 1           | 0          | 0           | 10           | WD                                                   |          |           |           |          |          |          | WD       | WD                |
| A*66:04                                                 | 66:04                  | HLA01375 |                                               | 5           | 0          | 0            | 0           | 1           | 0          | 1           | 7            | WD                                                   |          |           |           |          |          |          | WD       | WD                |
| A*66:05                                                 | 66:05                  | HLA02344 |                                               | 0           | 0          | 5            | 0           | 0           | 0          | 0           | 5            |                                                      |          | WD        |           |          |          |          | WD       | WD                |
| A*66:06                                                 | 66:06                  | HLA02472 |                                               | 0           | 0          | 0            | 0           | 0           | 0          | 1           | 1            |                                                      |          |           |           |          |          |          |          |                   |
| A*66:12                                                 | 66:12                  | HLA04531 |                                               | 0           | 4          | 0            | 0           | 0           | 0          | 0           | 4            |                                                      |          |           |           |          |          |          |          |                   |
| A*66:13                                                 | 66:13                  | HLA04810 |                                               | 0           | 0          | 9            | 0           | 1           | 0          | 1           | 11           |                                                      |          | WD        |           |          |          |          | WD       | WD                |
| A*66:15                                                 | 66:15                  | HLA05317 |                                               | 0           | 0          | 1            | 13          | 0           | 0          | 0           | 14           |                                                      |          |           | WD        |          |          |          | WD       | WD                |
| A*66:18                                                 | 66:18                  | HLA08483 |                                               | 0           | 0          | 0            | 0           | 0           | 0          | 1           | 1            |                                                      |          |           |           |          |          |          |          |                   |
| A*66:20                                                 | 66:20                  | HLA12630 |                                               | 0           | 0          | 0            | 0           | 1           | 0          | 0           | 1            |                                                      |          |           |           |          |          |          |          |                   |
| A*66:21                                                 | 66:21                  | HLA12631 |                                               | 0           | 0          | 0            | 0           | 1           | 0          | 0           | 1            |                                                      |          |           |           |          |          |          |          |                   |
| A*66:22                                                 | 66:22                  | HLA12935 |                                               | 0           | 0          | 2            | 0           | 0           | 0          | 1           | 3            |                                                      |          |           |           |          |          |          |          |                   |
| A*66:23                                                 | 66:23                  | HLA13435 |                                               | 0           | 0          | 0            | 1           | 0           | 0          | 1           | 2            |                                                      |          |           |           |          |          |          |          |                   |
| A*66:CODE                                               | 66:CODE                |          |                                               | 655         | 30         | 8182         | 160         | 357         | 47         | 698         | 10129        | NA                                                   | NA       | NA        | NA        | NA       | NA       | NA       | NA       | NA                |

| Supplemental Table 8: HLA-A Allele Summary <sup>a</sup> |                        |          | Allele Count by Population Group <sup>b</sup> |              |              |               |              |              |             |              |               | 3.0.0 CIWD Category by Population Group <sup>c</sup> |          |          |          |          |          |          |          |                   |
|---------------------------------------------------------|------------------------|----------|-----------------------------------------------|--------------|--------------|---------------|--------------|--------------|-------------|--------------|---------------|------------------------------------------------------|----------|----------|----------|----------|----------|----------|----------|-------------------|
| Allele                                                  | Genomic Typing         | AlleleID | G group                                       | AFA          | API          | EURO          | MENA         | HIS          | NAM         | UNK          | Total         | AFA                                                  | API      | EURO     | MENA     | HIS      | NAM      | UNK      | Total    | Highest Frequency |
| <b>A*68:01 total</b>                                    | <b>68:01 total</b>     |          |                                               | <b>13043</b> | <b>59517</b> | <b>373870</b> | <b>16614</b> | <b>31133</b> | <b>2773</b> | <b>40407</b> | <b>537357</b> | <b>C</b>                                             | <b>C</b> | <b>C</b> | <b>C</b> | <b>C</b> | <b>C</b> | <b>C</b> | <b>C</b> | <b>C</b>          |
| A*68:01                                                 | 68:01                  |          |                                               | 5797         | 811          | 30105         | 1633         | 3137         | 487         | 7034         | 49004         | C                                                    | C        | C        | C        | C        | C        | C        | C        | C                 |
| A*68:01P                                                | 68:01P                 |          |                                               | 0            | 3            | 284           | 3            | 3            | 0           | 4            | 297           |                                                      |          | I        |          |          |          |          | I        | I                 |
| <b>A*68:01:01G total</b>                                | <b>68:01:01G total</b> |          |                                               | <b>5349</b>  | <b>9734</b>  | <b>87516</b>  | <b>8967</b>  | <b>3442</b>  | <b>301</b>  | <b>7427</b>  | <b>122736</b> | <b>C</b>                                             | <b>C</b> | <b>C</b> | <b>C</b> | <b>C</b> | <b>C</b> | <b>C</b> | <b>C</b> | <b>C</b>          |
| A*68:01:01G                                             | 68:01:01G              |          | 68:01:01G                                     | 2801         | 9146         | 81815         | 8746         | 1511         | 58          | 5868         | 109945        | C                                                    | C        | C        | C        | C        | C        | C        | C        | C                 |
| A*68:01:01                                              | 68:01:01               |          | 68:01:01G                                     | 941          | 230          | 2005          | 112          | 725          | 86          | 688          | 4787          | C                                                    | C        | C        | C        | C        | C        | C        | C        | C                 |
| A*68:01:01:01                                           | 68:01:01:01            | HLA00115 | 68:01:01G                                     | 0            | 0            | 1             | 0            | 0            | 0           | 0            | 1             |                                                      |          |          |          |          |          |          |          |                   |
| A*68:01:01:02                                           | 68:01:01:02            | HLA05918 | 68:01:01G                                     | 1607         | 358          | 3694          | 109          | 1206         | 157         | 871          | 8002          | C                                                    | C        | C        | C        | C        | C        | C        | C        | C                 |
| A*68:01:01:03                                           | 68:01:01:03            | HLA16416 | 68:01:01G                                     | 0            | 0            | 1             | 0            | 0            | 0           | 0            | 1             |                                                      |          |          |          |          |          |          |          |                   |
| <b>A*68:01:02G total</b>                                | <b>68:01:02G total</b> |          |                                               | <b>1890</b>  | <b>48880</b> | <b>255896</b> | <b>6004</b>  | <b>24537</b> | <b>1985</b> | <b>25915</b> | <b>365107</b> | <b>C</b>                                             | <b>C</b> | <b>C</b> | <b>C</b> | <b>C</b> | <b>C</b> | <b>C</b> | <b>C</b> | <b>C</b>          |
| A*68:01:02G                                             | 68:01:02G              |          | 68:01:02G                                     | 1461         | 46023        | 243734        | 5823         | 17096        | 1406        | 23439        | 338982        | C                                                    | C        | C        | C        | C        | C        | C        | C        | C                 |
| A*68:01:02                                              | 68:01:02               |          | 68:01:02G                                     | 170          | 1055         | 4488          | 77           | 2875         | 201         | 1131         | 9997          | C                                                    | C        | C        | C        | C        | C        | C        | C        | C                 |
| A*68:01:02:01                                           | 68:01:02:01            | HLA00116 | 68:01:02G                                     | 123          | 842          | 1569          | 39           | 3939         | 313         | 558          | 7383          | C                                                    | C        | C        | WD       | C        | C        | C        | C        | C                 |
| A*68:01:02:02                                           | 68:01:02:02            | HLA10676 | 68:01:02G                                     | 129          | 954          | 5954          | 65           | 619          | 64          | 764          | 8549          | C                                                    | C        | C        | C        | C        | C        | C        | C        | C                 |
| A*68:01:02:03                                           | 68:01:02:03            | HLA13997 | 68:01:02G                                     | 7            | 1            | 150           | 0            | 7            | 1           | 21           | 187           | WD                                                   |          | I        |          | WD       |          | I        | I        | I                 |
| A*68:01:02:05                                           | 68:01:02:05            | HLA17340 | 68:01:02G                                     | 0            | 0            | 0             | 0            | 0            | 0           | 1            | 1             |                                                      |          |          |          |          |          |          |          |                   |
| A*68:11N                                                | 68:11N                 | HLA00973 | 68:01:02G                                     | 0            | 0            | 1             | 0            | 0            | 0           | 1            | 2             |                                                      |          |          |          |          |          |          |          |                   |
| A*68:33                                                 | 68:33                  | HLA02531 | 68:01:02G                                     | 0            | 0            | 0             | 0            | 1            | 0           | 0            | 1             |                                                      |          |          |          |          |          |          |          |                   |
| A*68:96                                                 | 68:96                  | HLA08803 | 68:01:02G                                     | 0            | 1            | 0             | 0            | 0            | 0           | 0            | 1             |                                                      |          |          |          |          |          |          |          |                   |
| A*68:152                                                | 68:152                 | HLA15572 | 68:01:02G                                     | 0            | 4            | 0             | 0            | 0            | 0           | 0            | 4             |                                                      |          |          |          |          |          |          |          |                   |
| A*68:01:03                                              | 68:01:03               | HLA01726 |                                               | 0            | 75           | 1             | 3            | 0            | 0           | 0            | 79            |                                                      | I        |          |          |          |          |          | WD       | I                 |
| A*68:01:04                                              | 68:01:04               | HLA02327 |                                               | 0            | 2            | 43            | 0            | 1            | 0           | 21           | 67            |                                                      |          | WD       |          |          |          | I        | WD       | I                 |
| A*68:01:05                                              | 68:01:05               | HLA02542 |                                               | 0            | 0            | 2             | 2            | 0            | 0           | 0            | 4             |                                                      |          |          |          |          |          |          |          |                   |
| A*68:01:06                                              | 68:01:06               | HLA02889 |                                               | 0            | 0            | 6             | 0            | 2            | 0           | 2            | 10            |                                                      |          | WD       |          |          |          |          | WD       | WD                |
| A*68:01:08                                              | 68:01:08               | HLA05443 |                                               | 0            | 4            | 0             | 0            | 0            | 0           | 0            | 4             |                                                      |          |          |          |          |          |          |          |                   |
| A*68:01:10                                              | 68:01:10               | HLA06192 |                                               | 0            | 1            | 0             | 0            | 0            | 0           | 0            | 1             |                                                      |          |          |          |          |          |          |          |                   |
| A*68:01:11                                              | 68:01:11               | HLA07550 |                                               | 0            | 0            | 0             | 2            | 3            | 0           | 2            | 7             |                                                      |          |          |          |          |          |          | WD       | WD                |
| A*68:01:14                                              | 68:01:14               | HLA07671 |                                               | 0            | 0            | 1             | 0            | 0            | 0           | 1            | 2             |                                                      |          |          |          |          |          |          |          |                   |
| A*68:01:17                                              | 68:01:17               | HLA08620 |                                               | 0            | 0            | 4             | 0            | 0            | 0           | 0            | 4             |                                                      |          |          |          |          |          |          |          |                   |
| A*68:01:18                                              | 68:01:18               | HLA08945 |                                               | 0            | 0            | 0             | 0            | 0            | 0           | 1            | 1             |                                                      |          |          |          |          |          |          |          |                   |

| Supplemental Table 8: HLA-A Allele Summary <sup>a</sup> |                        |          | Allele Count by Population Group <sup>b</sup> |              |            |              |             |              |             |              |               | 3.0.0 CIWD Category by Population Group <sup>c</sup> |          |          |           |          |          |          |          |                   |          |  |
|---------------------------------------------------------|------------------------|----------|-----------------------------------------------|--------------|------------|--------------|-------------|--------------|-------------|--------------|---------------|------------------------------------------------------|----------|----------|-----------|----------|----------|----------|----------|-------------------|----------|--|
| Allele                                                  | Genomic Typing         | AlleleID | G group                                       | AFA          | API        | EURO         | MENA        | HIS          | NAM         | UNK          | Total         | AFA                                                  | API      | EURO     | MENA      | HIS      | NAM      | UNK      | Total    | Highest Frequency |          |  |
| A*68:01:19                                              | 68:01:19               | HLA09413 |                                               | 0            | 0          | 4            | 0           | 0            | 0           | 0            | 4             |                                                      |          |          |           |          |          |          |          |                   |          |  |
| A*68:01:20                                              | 68:01:20               | HLA09712 |                                               | 6            | 0          | 0            | 0           | 0            | 0           | 0            | 6             | WD                                                   |          |          |           |          |          |          | WD       | WD                |          |  |
| A*68:01:22                                              | 68:01:22               | HLA11209 |                                               | 0            | 0          | 0            | 0           | 4            | 0           | 0            | 4             |                                                      |          |          |           |          |          |          |          |                   |          |  |
| A*68:01:24                                              | 68:01:24               | HLA11635 |                                               | 0            | 4          | 3            | 0           | 0            | 0           | 0            | 7             |                                                      |          |          |           |          |          |          | WD       | WD                |          |  |
| A*68:01:25                                              | 68:01:25               | HLA11790 |                                               | 0            | 0          | 2            | 0           | 0            | 0           | 0            | 2             |                                                      |          |          |           |          |          |          |          |                   |          |  |
| A*68:01:26                                              | 68:01:26               | HLA12106 |                                               | 0            | 0          | 1            | 0           | 0            | 0           | 0            | 1             |                                                      |          |          |           |          |          |          |          |                   |          |  |
| A*68:01:27                                              | 68:01:27               | HLA12154 |                                               | 1            | 0          | 2            | 0           | 0            | 0           | 0            | 3             |                                                      |          |          |           |          |          |          |          |                   |          |  |
| A*68:01:28                                              | 68:01:28               | HLA12244 |                                               | 0            | 0          | 0            | 0           | 3            | 0           | 1            | 4             |                                                      |          |          |           |          |          |          |          |                   |          |  |
| A*68:01:29                                              | 68:01:29               | HLA12939 |                                               | 0            | 2          | 0            | 0           | 0            | 0           | 0            | 2             |                                                      |          |          |           |          |          |          |          |                   |          |  |
| A*68:01:30                                              | 68:01:30               | HLA12940 |                                               | 0            | 1          | 0            | 0           | 0            | 0           | 0            | 1             |                                                      |          |          |           |          |          |          |          |                   |          |  |
| A*68:01:31                                              | 68:01:31               | HLA12941 |                                               | 0            | 0          | 1            | 0           | 1            | 0           | 0            | 2             |                                                      |          |          |           |          |          |          |          |                   |          |  |
| <b>A*68:02 total</b>                                    | <b>68:02 total</b>     |          |                                               | <b>21838</b> | <b>734</b> | <b>74562</b> | <b>3759</b> | <b>14677</b> | <b>1797</b> | <b>16925</b> | <b>134292</b> | <b>C</b>                                             | <b>C</b> | <b>C</b> | <b>C</b>  | <b>C</b> | <b>C</b> | <b>C</b> | <b>C</b> | <b>C</b>          | <b>C</b> |  |
| A*68:02                                                 | 68:02                  |          |                                               | 1874         | 35         | 5058         | 256         | 1784         | 170         | 981          | 10158         | C                                                    | I        | C        | C         | C        | C        | C        | C        | C                 | C        |  |
| A*68:02P                                                | 68:02P                 |          |                                               | 0            | 0          | 38           | 1           | 0            | 0           | 1            | 40            |                                                      |          | WD       |           |          |          |          | WD       | WD                |          |  |
| <b>A*68:02:01G total</b>                                | <b>68:02:01G total</b> |          |                                               | <b>19839</b> | <b>699</b> | <b>69451</b> | <b>3502</b> | <b>12877</b> | <b>1622</b> | <b>15908</b> | <b>123898</b> | <b>C</b>                                             | <b>C</b> | <b>C</b> | <b>C</b>  | <b>C</b> | <b>C</b> | <b>C</b> | <b>C</b> | <b>C</b>          | <b>C</b> |  |
| A*68:02:01G                                             | 68:02:01G              |          | 68:02:01G                                     | 5610         | 450        | 49284        | 2640        | 3165         | 128         | 6045         | 67322         | C                                                    | C        | C        | C         | C        | C        | C        | C        | C                 | C        |  |
| A*68:02:01                                              | 68:02:01               |          | 68:02:01G                                     | 11300        | 196        | 17285        | 737         | 6991         | 1088        | 8679         | 46276         | C                                                    | C        | C        | C         | C        | C        | C        | C        | C                 | C        |  |
| A*68:02:01:01                                           | 68:02:01:01            | HLA00117 | 68:02:01G                                     | 2928         | 53         | 2829         | 122         | 2689         | 404         | 1176         | 10201         | C                                                    | I        | C        | C         | C        | C        | C        | C        | C                 | C        |  |
| A*68:02:01:02                                           | 68:02:01:02            | HLA02508 | 68:02:01G                                     | 0            | 0          | 17           | 0           | 2            | 1           | 2            | 22            |                                                      |          | WD       |           |          |          |          | WD       | WD                |          |  |
| A*68:02:01:03                                           | 68:02:01:03            | HLA02911 | 68:02:01G                                     | 1            | 0          | 36           | 3           | 30           | 1           | 5            | 76            |                                                      |          | WD       |           | I        |          | WD       | WD       | I                 |          |  |
| A*68:163                                                | 68:163                 | HLA16435 | 68:02:01G                                     | 0            | 0          | 0            | 0           | 0            | 0           | 1            | 1             |                                                      |          |          |           |          |          |          |          |                   |          |  |
| A*68:02:02                                              | 68:02:02               | HLA03152 |                                               | 116          | 0          | 5            | 0           | 15           | 5           | 34           | 175           | C                                                    |          | WD       |           | I        | WD       | I        | I        | I                 | C        |  |
| A*68:02:03                                              | 68:02:03               | HLA04545 |                                               | 0            | 0          | 5            | 0           | 0            | 0           | 0            | 5             |                                                      |          | WD       |           |          |          |          | WD       | WD                |          |  |
| A*68:02:04                                              | 68:02:04               | HLA04547 |                                               | 9            | 0          | 0            | 0           | 1            | 0           | 0            | 10            | WD                                                   |          |          |           |          |          |          | WD       | WD                |          |  |
| A*68:02:05                                              | 68:02:05               | HLA07572 |                                               | 0            | 0          | 5            | 0           | 0            | 0           | 0            | 5             |                                                      |          | WD       |           |          |          |          | WD       | WD                |          |  |
| A*68:02:08                                              | 68:02:08               | HLA12242 |                                               | 0            | 0          | 0            | 0           | 0            | 0           | 1            | 1             |                                                      |          |          |           |          |          |          |          |                   |          |  |
| <b>A*68:03 total</b>                                    | <b>68:03 total</b>     |          |                                               | <b>164</b>   | <b>96</b>  | <b>587</b>   | <b>21</b>   | <b>10269</b> | <b>767</b>  | <b>1550</b>  | <b>13454</b>  | <b>C</b>                                             | <b>I</b> | <b>I</b> | <b>WD</b> | <b>C</b> | <b>C</b> | <b>C</b> | <b>C</b> | <b>C</b>          | <b>C</b> |  |
| A*68:03                                                 | 68:03                  |          |                                               | 16           | 5          | 32           | 1           | 1021         | 60          | 61           | 1196          | WD                                                   | WD       | WD       |           | C        | C        | I        | I        | I                 | C        |  |
| A*68:03P                                                | 68:03P                 |          |                                               | 0            | 0          | 1            | 0           | 0            | 0           | 0            | 1             |                                                      |          |          |           |          |          |          |          |                   |          |  |
| A*68:03:01                                              | 68:03:01               | HLA00118 |                                               | 148          | 90         | 553          | 20          | 9246         | 704         | 1488         | 12249         | C                                                    | I        | I        | WD        | C        | C        | C        | C        | C                 | C        |  |



| Supplemental Table 8: HLA-A Allele Summary <sup>a</sup> |                    |          | Allele Count by Population Group <sup>b</sup> |          |          |           |           |          |          |          |            | 3.0.0 CIWD Category by Population Group <sup>c</sup> |     |           |          |          |     |           |           |                   |
|---------------------------------------------------------|--------------------|----------|-----------------------------------------------|----------|----------|-----------|-----------|----------|----------|----------|------------|------------------------------------------------------|-----|-----------|----------|----------|-----|-----------|-----------|-------------------|
| Allele                                                  | Genomic Typing     | AlleleID | G group                                       | AFA      | API      | EURO      | MENA      | HIS      | NAM      | UNK      | Total      | AFA                                                  | API | EURO      | MENA     | HIS      | NAM | UNK       | Total     | Highest Frequency |
| A*68:03:02                                              | 68:03:02           | HLA00119 |                                               | 0        | 0        | 0         | 0         | 2        | 0        | 1        | 3          |                                                      |     |           |          |          |     |           |           |                   |
| A*68:03:03                                              | 68:03:03           | HLA05557 |                                               | 0        | 1        | 1         | 0         | 0        | 3        | 0        | 5          |                                                      |     |           |          |          |     |           | WD        | WD                |
| <b>A*68:04 total</b>                                    | <b>68:04 total</b> |          |                                               | <b>1</b> | <b>0</b> | <b>0</b>  | <b>0</b>  | <b>3</b> | <b>0</b> | <b>8</b> | <b>12</b>  |                                                      |     |           |          |          |     | <b>WD</b> | <b>WD</b> | <b>WD</b>         |
| A*68:04                                                 | 68:04              |          |                                               | 1        | 0        | 0         | 0         | 1        | 0        | 2        | 4          |                                                      |     |           |          |          |     |           |           |                   |
| A*68:04:02                                              | 68:04:02           | HLA14972 |                                               | 0        | 0        | 0         | 0         | 2        | 0        | 6        | 8          |                                                      |     |           |          |          |     | WD        | WD        | WD                |
| A*68:05                                                 | 68:05              | HLA00121 |                                               | 34       | 20       | 87        | 4         | 1992     | 110      | 263      | 2510       | WD                                                   | I   | WD        |          | C        | C   | C         | C         | C                 |
| A*68:06                                                 | 68:06              | HLA00122 |                                               | 1        | 0        | 3         | 0         | 53       | 2        | 7        | 66         |                                                      |     |           |          | I        |     | WD        | WD        | I                 |
| A*68:07                                                 | 68:07              | HLA00123 |                                               | 6        | 3        | 23        | 0         | 190      | 13       | 34       | 269        | WD                                                   |     | WD        |          | C        | C   | I         | I         | C                 |
| <b>A*68:08 total</b>                                    | <b>68:08 total</b> |          |                                               | <b>9</b> | <b>0</b> | <b>10</b> | <b>0</b>  | <b>0</b> | <b>0</b> | <b>5</b> | <b>24</b>  | <b>WD</b>                                            |     | <b>WD</b> |          |          |     | <b>WD</b> | <b>WD</b> | <b>WD</b>         |
| A*68:08                                                 | 68:08              |          |                                               | 1        | 0        | 2         | 0         | 0        | 0        | 0        | 3          |                                                      |     |           |          |          |     |           |           |                   |
| A*68:08:01                                              | 68:08:01           | HLA00124 |                                               | 8        | 0        | 0         | 0         | 0        | 0        | 2        | 10         | WD                                                   |     |           |          |          |     |           | WD        | WD                |
| A*68:08:02                                              | 68:08:02           | HLA03519 |                                               | 0        | 0        | 8         | 0         | 0        | 0        | 3        | 11         |                                                      |     | WD        |          |          |     |           | WD        | WD                |
| A*68:09                                                 | 68:09              | HLA00125 |                                               | 0        | 0        | 1         | 0         | 0        | 0        | 0        | 1          |                                                      |     |           |          |          |     |           |           |                   |
| A*68:10                                                 | 68:10              | HLA00972 |                                               | 95       | 0        | 3         | 0         | 1        | 0        | 15       | 114        | C                                                    |     |           |          |          |     | I         | WD        | C                 |
| A*68:12                                                 | 68:12              | HLA01046 |                                               | 2        | 8        | 536       | 41        | 59       | 8        | 30       | 684        |                                                      | WD  | I         | C        | I        | C   | I         | I         | C                 |
| <b>A*68:13 total</b>                                    | <b>68:13 total</b> |          |                                               | <b>0</b> | <b>2</b> | <b>81</b> | <b>48</b> | <b>0</b> | <b>0</b> | <b>4</b> | <b>135</b> |                                                      |     | <b>WD</b> | <b>C</b> |          |     |           | <b>WD</b> | <b>C</b>          |
| A*68:13                                                 | 68:13              |          |                                               | 0        | 1        | 16        | 12        | 0        | 0        | 0        | 29         |                                                      |     | WD        | WD       |          |     |           | WD        | WD                |
| A*68:13:01                                              | 68:13:01           | HLA01047 |                                               | 0        | 1        | 65        | 36        | 0        | 0        | 4        | 106        |                                                      |     | WD        | WD       |          |     |           | WD        | WD                |
| A*68:15                                                 | 68:15              | HLA01106 |                                               | 112      | 0        | 23        | 0         | 14       | 1        | 20       | 170        | C                                                    |     | WD        |          | I        |     | I         | I         | C                 |
| A*68:16                                                 | 68:16              | HLA01119 |                                               | 1        | 2        | 47        | 0         | 49       | 0        | 63       | 162        |                                                      |     | WD        |          | I        |     | I         | I         | I                 |
| A*68:17                                                 | 68:17              | HLA01170 |                                               | 1        | 3        | 1027      | 2         | 1397     | 22       | 1676     | 4128       |                                                      |     | I         |          | C        | C   | C         | C         | C                 |
| A*68:18N                                                | 68:18N             | HLA01291 |                                               | 0        | 1        | 82        | 0         | 0        | 0        | 2        | 85         |                                                      |     | WD        |          |          |     |           | WD        | WD                |
| A*68:19                                                 | 68:19              | HLA01303 |                                               | 1        | 0        | 5         | 0         | 0        | 0        | 2        | 8          |                                                      |     | WD        |          |          |     |           | WD        | WD                |
| A*68:20                                                 | 68:20              | HLA01464 |                                               | 0        | 1        | 2         | 1         | 34       | 1        | 8        | 47         |                                                      |     |           |          | I        |     | WD        | WD        | I                 |
| <b>A*68:21 total</b>                                    | <b>68:21 total</b> |          |                                               | <b>1</b> | <b>0</b> | <b>0</b>  | <b>0</b>  | <b>5</b> | <b>0</b> | <b>1</b> | <b>7</b>   |                                                      |     |           |          | <b>D</b> |     |           | <b>WD</b> | <b>WD</b>         |
| A*68:21:01                                              | 68:21:01           | HLA01590 |                                               | 1        | 0        | 0         | 0         | 5        | 0        | 1        | 7          |                                                      |     |           |          | WD       |     |           | WD        | WD                |
| A*68:22                                                 | 68:22              | HLA01595 |                                               | 0        | 0        | 39        | 0         | 0        | 0        | 2        | 41         |                                                      |     | WD        |          |          |     |           | WD        | WD                |
| A*68:23                                                 | 68:23              | HLA01652 |                                               | 0        | 2        | 43        | 0         | 63       | 1        | 49       | 158        |                                                      |     | WD        |          | I        |     | I         | WD        | I                 |
| A*68:24                                                 | 68:24              | HLA01707 |                                               | 8        | 221      | 513       | 27        | 17       | 0        | 29       | 815        | WD                                                   | C   | I         | WD       | I        |     | I         | I         | C                 |
| A*68:25                                                 | 68:25              | HLA01822 |                                               | 0        | 1        | 184       | 0         | 2        | 1        | 9        | 197        |                                                      |     | I         |          |          |     | WD        | I         | I                 |

| Supplemental Table 8: HLA-A Allele Summary <sup>a</sup> |                    |          | Allele Count by Population Group <sup>b</sup> |          |          |           |           |          |          |           |            | 3.0.0 CIWD Category by Population Group <sup>c</sup> |     |           |           |     |     |          |           |                   |
|---------------------------------------------------------|--------------------|----------|-----------------------------------------------|----------|----------|-----------|-----------|----------|----------|-----------|------------|------------------------------------------------------|-----|-----------|-----------|-----|-----|----------|-----------|-------------------|
| Allele                                                  | Genomic Typing     | AlleleID | G group                                       | AFA      | API      | EURO      | MENA      | HIS      | NAM      | UNK       | Total      | AFA                                                  | API | EURO      | MENA      | HIS | NAM | UNK      | Total     | Highest Frequency |
| A*68:26                                                 | 68:26              | HLA01918 |                                               | 2        | 0        | 28        | 0         | 0        | 0        | 6         | 36         |                                                      |     | WD        |           |     |     | WD       | WD        | WD                |
| <b>A*68:27 total</b>                                    | <b>68:27 total</b> |          |                                               | <b>4</b> | <b>0</b> | <b>10</b> | <b>1</b>  | <b>0</b> | <b>0</b> | <b>2</b>  | <b>17</b>  |                                                      |     | <b>WD</b> |           |     |     |          | <b>WD</b> | <b>WD</b>         |
| A*68:27                                                 | 68:27              |          |                                               | 1        | 0        | 2         | 0         | 0        | 0        | 0         | 3          |                                                      |     |           |           |     |     |          |           |                   |
| A*68:27:01                                              | 68:27:01           | HLA01944 |                                               | 3        | 0        | 7         | 1         | 0        | 0        | 2         | 13         |                                                      |     | WD        |           |     |     |          | WD        | WD                |
| A*68:27:02                                              | 68:27:02           | HLA09786 |                                               | 0        | 0        | 1         | 0         | 0        | 0        | 0         | 1          |                                                      |     |           |           |     |     |          |           |                   |
| A*68:28                                                 | 68:28              | HLA02103 |                                               | 1        | 0        | 0         | 0         | 0        | 0        | 3         | 4          |                                                      |     |           |           |     |     |          |           |                   |
| A*68:29                                                 | 68:29              | HLA02361 |                                               | 0        | 0        | 0         | 0         | 6        | 1        | 1         | 8          |                                                      |     |           |           | WD  |     |          | WD        | WD                |
| A*68:30                                                 | 68:30              | HLA02364 |                                               | 1        | 1        | 4         | 0         | 11       | 1        | 1         | 19         |                                                      |     |           |           | I   |     |          | WD        | I                 |
| A*68:31                                                 | 68:31              | HLA02441 |                                               | 2        | 0        | 4         | 0         | 24       | 4        | 3         | 37         |                                                      |     |           |           | I   |     |          | WD        | I                 |
| A*68:32                                                 | 68:32              | HLA02470 |                                               | 0        | 0        | 10        | 0         | 0        | 0        | 2         | 12         |                                                      |     | WD        |           |     |     |          | WD        | WD                |
| A*68:34                                                 | 68:34              | HLA02595 |                                               | 1        | 0        | 0         | 0         | 0        | 0        | 0         | 1          |                                                      |     |           |           |     |     |          |           |                   |
| A*68:35                                                 | 68:35              | HLA02624 |                                               | 0        | 1        | 214       | 1         | 4        | 0        | 10        | 230        |                                                      |     | I         |           |     |     | WD       | I         | I                 |
| A*68:36                                                 | 68:36              | HLA02701 |                                               | 0        | 0        | 1         | 0         | 6        | 0        | 1         | 8          |                                                      |     |           |           | WD  |     |          | WD        | WD                |
| A*68:37                                                 | 68:37              | HLA02780 |                                               | 0        | 0        | 155       | 0         | 0        | 0        | 3         | 158        |                                                      |     | I         |           |     |     |          | WD        | I                 |
| A*68:38                                                 | 68:38              | HLA02859 |                                               | 0        | 0        | 3         | 14        | 0        | 0        | 0         | 17         |                                                      |     |           | WD        |     |     |          | WD        | WD                |
| A*68:39                                                 | 68:39              | HLA02940 |                                               | 1        | 0        | 0         | 0         | 0        | 0        | 0         | 1          |                                                      |     |           |           |     |     |          |           |                   |
| A*68:40                                                 | 68:40              | HLA02982 |                                               | 9        | 0        | 0         | 0         | 0        | 0        | 1         | 10         | WD                                                   |     |           |           |     |     |          | WD        | WD                |
| A*68:41                                                 | 68:41              | HLA03050 |                                               | 0        | 0        | 2         | 0         | 0        | 0        | 0         | 2          |                                                      |     |           |           |     |     |          |           |                   |
| <b>A*68:43 total</b>                                    | <b>68:43 total</b> |          |                                               | <b>0</b> | <b>0</b> | <b>3</b>  | <b>0</b>  | <b>0</b> | <b>0</b> | <b>2</b>  | <b>5</b>   |                                                      |     |           |           |     |     |          | <b>WD</b> | <b>WD</b>         |
| A*68:43                                                 | 68:43              |          |                                               | 0        | 0        | 0         | 0         | 0        | 0        | 1         | 1          |                                                      |     |           |           |     |     |          |           |                   |
| A*68:43:01                                              | 68:43:01           | HLA03340 |                                               | 0        | 0        | 3         | 0         | 0        | 0        | 1         | 4          |                                                      |     |           |           |     |     |          |           |                   |
| A*68:44                                                 | 68:44              | HLA03533 |                                               | 1        | 0        | 0         | 0         | 0        | 0        | 0         | 1          |                                                      |     |           |           |     |     |          |           |                   |
| A*68:45                                                 | 68:45              | HLA03561 |                                               | 0        | 0        | 2         | 0         | 1        | 0        | 2         | 5          |                                                      |     |           |           |     |     |          | WD        | WD                |
| A*68:46                                                 | 68:46              | HLA03581 |                                               | 0        | 0        | 1         | 0         | 6        | 0        | 1         | 8          |                                                      |     |           |           | WD  |     |          | WD        | WD                |
| A*68:49N                                                | 68:49N             | HLA04774 |                                               | 0        | 0        | 1         | 0         | 0        | 0        | 0         | 1          |                                                      |     |           |           |     |     |          |           |                   |
| A*68:50                                                 | 68:50              | HLA05123 |                                               | 0        | 4        | 0         | 0         | 0        | 0        | 0         | 4          |                                                      |     |           |           |     |     |          |           |                   |
| A*68:53                                                 | 68:53              | HLA05342 |                                               | 0        | 0        | 2         | 0         | 0        | 0        | 0         | 2          |                                                      |     |           |           |     |     |          |           |                   |
| A*68:54                                                 | 68:54              | HLA05350 |                                               | 8        | 0        | 1         | 0         | 0        | 0        | 5         | 14         | WD                                                   |     |           |           |     |     |          | WD        | WD                |
| <b>A*68:55 total</b>                                    | <b>68:55 total</b> |          |                                               | <b>0</b> | <b>0</b> | <b>16</b> | <b>36</b> | <b>2</b> | <b>0</b> | <b>83</b> | <b>137</b> |                                                      |     | <b>WD</b> | <b>WD</b> |     |     | <b>I</b> | <b>WD</b> | <b>I</b>          |
| A*68:55                                                 | 68:55              |          |                                               | 0        | 0        | 4         | 6         | 1        | 0        | 27        | 38         |                                                      |     |           | WD        |     |     |          | I         | WD                |

| Supplemental Table 8: HLA-A Allele Summary <sup>a</sup> |                    |          | Allele Count by Population Group <sup>b</sup> |          |          |          |          |          |          |          |          | 3.0.0 CIWD Category by Population Group <sup>c</sup> |     |      |      |     |     |     |       |                   |  |
|---------------------------------------------------------|--------------------|----------|-----------------------------------------------|----------|----------|----------|----------|----------|----------|----------|----------|------------------------------------------------------|-----|------|------|-----|-----|-----|-------|-------------------|--|
| Allele                                                  | Genomic Typing     | AlleleID | G group                                       | AFA      | API      | EURO     | MENA     | HIS      | NAM      | UNK      | Total    | AFA                                                  | API | EURO | MENA | HIS | NAM | UNK | Total | Highest Frequency |  |
| A*68:55:01                                              | 68:55:01           | HLA05431 |                                               | 0        | 0        | 12       | 30       | 0        | 0        | 56       | 98       |                                                      |     | WD   | WD   |     |     | I   | WD    | I                 |  |
| A*68:55:02                                              | 68:55:02           | HLA11988 |                                               | 0        | 0        | 0        | 0        | 1        | 0        | 0        | 1        |                                                      |     |      |      |     |     |     |       |                   |  |
| A*68:56                                                 | 68:56              | HLA05437 |                                               | 0        | 0        | 2        | 0        | 0        | 0        | 0        | 2        |                                                      |     |      |      |     |     |     |       |                   |  |
| A*68:57                                                 | 68:57              | HLA05442 |                                               | 0        | 0        | 12       | 4        | 0        | 0        | 1        | 17       |                                                      |     | WD   |      |     |     |     | WD    | WD                |  |
| A*68:59N                                                | 68:59N             | HLA05622 |                                               | 0        | 0        | 3        | 0        | 0        | 0        | 0        | 3        |                                                      |     |      |      |     |     |     |       |                   |  |
| A*68:60                                                 | 68:60              | HLA05645 |                                               | 4        | 0        | 0        | 0        | 0        | 0        | 2        | 6        |                                                      |     |      |      |     |     |     | WD    | WD                |  |
| A*68:61                                                 | 68:61              | HLA05650 |                                               | 0        | 0        | 1        | 0        | 0        | 0        | 0        | 1        |                                                      |     |      |      |     |     |     |       |                   |  |
| A*68:65                                                 | 68:65              | HLA05710 |                                               | 0        | 2        | 1        | 0        | 1        | 0        | 0        | 4        |                                                      |     |      |      |     |     |     |       |                   |  |
| <b>A*68:66 total</b>                                    | <b>68:66 total</b> |          |                                               | <b>0</b> | <b>1</b> | <b>2</b> | <b>0</b> | <b>0</b> | <b>0</b> | <b>0</b> | <b>3</b> |                                                      |     |      |      |     |     |     |       |                   |  |
| A*68:66                                                 | 68:66              |          |                                               | 0        | 1        | 2        | 0        | 0        | 0        | 0        | 3        |                                                      |     |      |      |     |     |     |       |                   |  |
| A*68:67                                                 | 68:67              | HLA05938 |                                               | 20       | 0        | 0        | 0        | 0        | 0        | 4        | 24       | WD                                                   |     |      |      |     |     |     | WD    | WD                |  |
| A*68:68                                                 | 68:68              | HLA05961 |                                               | 9        | 0        | 0        | 0        | 0        | 0        | 0        | 9        | WD                                                   |     |      |      |     |     |     | WD    | WD                |  |
| A*68:69                                                 | 68:69              | HLA05986 |                                               | 0        | 2        | 0        | 0        | 0        | 0        | 1        | 3        |                                                      |     |      |      |     |     |     |       |                   |  |
| A*68:70                                                 | 68:70              | HLA06013 |                                               | 0        | 0        | 3        | 0        | 0        | 0        | 0        | 3        |                                                      |     |      |      |     |     |     |       |                   |  |
| A*68:71                                                 | 68:71              | HLA06129 |                                               | 0        | 0        | 1        | 0        | 0        | 0        | 0        | 1        |                                                      |     |      |      |     |     |     |       |                   |  |
| A*68:72                                                 | 68:72              | HLA06200 |                                               | 0        | 0        | 8        | 0        | 0        | 0        | 0        | 8        |                                                      |     | WD   |      |     |     |     | WD    | WD                |  |
| A*68:73                                                 | 68:73              | HLA06340 |                                               | 0        | 0        | 3        | 0        | 0        | 0        | 0        | 3        |                                                      |     |      |      |     |     |     |       |                   |  |
| <b>A*68:75 total</b>                                    | <b>68:75 total</b> |          |                                               | <b>3</b> | <b>0</b> | <b>0</b> | <b>0</b> | <b>1</b> | <b>0</b> | <b>0</b> | <b>4</b> |                                                      |     |      |      |     |     |     |       |                   |  |
| A*68:75                                                 | 68:75              |          |                                               | 1        | 0        | 0        | 0        | 0        | 0        | 0        | 1        |                                                      |     |      |      |     |     |     |       |                   |  |
| A*68:75:01                                              | 68:75:01           | HLA06349 |                                               | 0        | 0        | 0        | 0        | 1        | 0        | 0        | 1        |                                                      |     |      |      |     |     |     |       |                   |  |
| A*68:75:02                                              | 68:75:02           | HLA09787 |                                               | 2        | 0        | 0        | 0        | 0        | 0        | 0        | 2        |                                                      |     |      |      |     |     |     |       |                   |  |
| A*68:77                                                 | 68:77              | HLA06540 |                                               | 2        | 0        | 0        | 0        | 0        | 0        | 0        | 2        |                                                      |     |      |      |     |     |     |       |                   |  |
| A*68:79                                                 | 68:79              | HLA06748 |                                               | 0        | 0        | 1        | 1        | 1        | 0        | 0        | 3        |                                                      |     |      |      |     |     |     |       |                   |  |
| A*68:80                                                 | 68:80              | HLA06739 |                                               | 0        | 0        | 2        | 0        | 0        | 0        | 0        | 2        |                                                      |     |      |      |     |     |     |       |                   |  |
| A*68:81                                                 | 68:81              | HLA06796 |                                               | 0        | 0        | 0        | 0        | 1        | 0        | 0        | 1        |                                                      |     |      |      |     |     |     |       |                   |  |
| A*68:83                                                 | 68:83              | HLA06836 |                                               | 0        | 0        | 0        | 0        | 2        | 0        | 0        | 2        |                                                      |     |      |      |     |     |     |       |                   |  |
| A*68:84                                                 | 68:84              | HLA07290 |                                               | 0        | 0        | 0        | 1        | 0        | 0        | 0        | 1        |                                                      |     |      |      |     |     |     |       |                   |  |
| A*68:85                                                 | 68:85              | HLA07350 |                                               | 0        | 0        | 2        | 0        | 5        | 0        | 1        | 8        |                                                      |     |      |      | WD  |     |     | WD    | WD                |  |
| A*68:86                                                 | 68:86              | HLA07571 |                                               | 0        | 0        | 1        | 0        | 0        | 0        | 0        | 1        |                                                      |     |      |      |     |     |     |       |                   |  |
| A*68:89                                                 | 68:89              | HLA08043 |                                               | 0        | 0        | 4        | 0        | 0        | 0        | 0        | 4        |                                                      |     |      |      |     |     |     |       |                   |  |

| Supplemental Table 8: HLA-A Allele Summary <sup>a</sup> |                     |          | Allele Count by Population Group <sup>b</sup> |          |          |          |          |          |          |          |          | 3.0.0 CIWD Category by Population Group <sup>c</sup> |     |      |      |          |     |     |           |                   |  |
|---------------------------------------------------------|---------------------|----------|-----------------------------------------------|----------|----------|----------|----------|----------|----------|----------|----------|------------------------------------------------------|-----|------|------|----------|-----|-----|-----------|-------------------|--|
| Allele                                                  | Genomic Typing      | AlleleID | G group                                       | AFA      | API      | EURO     | MENA     | HIS      | NAM      | UNK      | Total    | AFA                                                  | API | EURO | MENA | HIS      | NAM | UNK | Total     | Highest Frequency |  |
| A*68:90                                                 | 68:90               | HLA08044 |                                               | 0        | 0        | 0        | 0        | 0        | 0        | 1        | 1        |                                                      |     |      |      |          |     |     |           |                   |  |
| A*68:91                                                 | 68:91               | HLA08045 |                                               | 0        | 0        | 13       | 5        | 0        | 0        | 0        | 18       |                                                      |     | WD   | WD   |          |     |     | WD        | WD                |  |
| A*68:93                                                 | 68:93               | HLA08057 |                                               | 0        | 0        | 0        | 0        | 3        | 1        | 0        | 4        |                                                      |     |      |      |          |     |     |           |                   |  |
| A*68:95                                                 | 68:95               | HLA08619 |                                               | 0        | 0        | 5        | 0        | 0        | 0        | 0        | 5        |                                                      |     | WD   |      |          |     |     | WD        | WD                |  |
| A*68:97                                                 | 68:97               | HLA08940 |                                               | 0        | 0        | 0        | 0        | 1        | 0        | 0        | 1        |                                                      |     |      |      |          |     |     |           |                   |  |
| A*68:98                                                 | 68:98               | HLA08948 |                                               | 0        | 0        | 0        | 1        | 0        | 0        | 0        | 1        |                                                      |     |      |      |          |     |     |           |                   |  |
| A*68:99                                                 | 68:99               | HLA09108 |                                               | 0        | 17       | 2        | 0        | 1        | 0        | 1        | 21       |                                                      | I   |      |      |          |     |     | WD        | I                 |  |
| A*68:101                                                | 68:101              | HLA09659 |                                               | 0        | 0        | 7        | 0        | 0        | 0        | 0        | 7        |                                                      |     | WD   |      |          |     |     | WD        | WD                |  |
| <b>A*68:103 total</b>                                   | <b>68:103 total</b> |          |                                               | <b>0</b> | <b>0</b> | <b>0</b> | <b>1</b> | <b>0</b> | <b>0</b> | <b>0</b> | <b>1</b> |                                                      |     |      |      |          |     |     |           |                   |  |
| A*68:103:02                                             | 68:103:02           | HLA12080 |                                               | 0        | 0        | 0        | 1        | 0        | 0        | 0        | 1        |                                                      |     |      |      |          |     |     |           |                   |  |
| <b>A*68:104 total</b>                                   | <b>68:104 total</b> |          |                                               | <b>0</b> | <b>0</b> | <b>1</b> | <b>0</b> | <b>7</b> | <b>0</b> | <b>0</b> | <b>8</b> |                                                      |     |      |      | <b>D</b> |     |     | <b>WD</b> | <b>WD</b>         |  |
| A*68:104                                                | 68:104              |          |                                               | 0        | 0        | 1        | 0        | 2        | 0        | 0        | 3        |                                                      |     |      |      |          |     |     |           |                   |  |
| A*68:104:01                                             | 68:104:01           | HLA09919 |                                               | 0        | 0        | 0        | 0        | 5        | 0        | 0        | 5        |                                                      |     |      |      | WD       |     |     | WD        | WD                |  |
| A*68:106                                                | 68:106              | HLA10126 |                                               | 1        | 0        | 0        | 0        | 0        | 1        | 0        | 2        |                                                      |     |      |      |          |     |     |           |                   |  |
| A*68:110                                                | 68:110              | HLA10963 |                                               | 2        | 0        | 0        | 0        | 0        | 0        | 0        | 2        |                                                      |     |      |      |          |     |     |           |                   |  |
| A*68:111                                                | 68:111              | HLA10973 |                                               | 0        | 0        | 1        | 0        | 0        | 0        | 0        | 1        |                                                      |     |      |      |          |     |     |           |                   |  |
| <b>A*68:112 total</b>                                   | <b>68:112 total</b> |          |                                               | <b>0</b> | <b>1</b> | <b>1</b> | <b>0</b> | <b>0</b> | <b>0</b> | <b>0</b> | <b>2</b> |                                                      |     |      |      |          |     |     |           |                   |  |
| A*68:112:01                                             | 68:112:01           | HLA11208 |                                               | 0        | 0        | 1        | 0        | 0        | 0        | 0        | 1        |                                                      |     |      |      |          |     |     |           |                   |  |
| A*68:112:02                                             | 68:112:02           | HLA13840 |                                               | 0        | 1        | 0        | 0        | 0        | 0        | 0        | 1        |                                                      |     |      |      |          |     |     |           |                   |  |
| A*68:114                                                | 68:114              | HLA11791 |                                               | 0        | 0        | 2        | 0        | 0        | 0        | 0        | 2        |                                                      |     |      |      |          |     |     |           |                   |  |
| A*68:117                                                | 68:117              | HLA11971 |                                               | 0        | 0        | 0        | 3        | 0        | 0        | 0        | 3        |                                                      |     |      |      |          |     |     |           |                   |  |
| A*68:122                                                | 68:122              | HLA12454 |                                               | 0        | 0        | 0        | 0        | 1        | 0        | 0        | 1        |                                                      |     |      |      |          |     |     |           |                   |  |
| A*68:124                                                | 68:124              | HLA12548 |                                               | 0        | 0        | 0        | 0        | 2        | 0        | 0        | 2        |                                                      |     |      |      |          |     |     |           |                   |  |
| A*68:125                                                | 68:125              | HLA12623 |                                               | 1        | 0        | 0        | 0        | 0        | 0        | 0        | 1        |                                                      |     |      |      |          |     |     |           |                   |  |
| A*68:127                                                | 68:127              | HLA12628 |                                               | 1        | 0        | 0        | 0        | 0        | 0        | 0        | 1        |                                                      |     |      |      |          |     |     |           |                   |  |
| A*68:128                                                | 68:128              | HLA12927 |                                               | 1        | 0        | 0        | 0        | 0        | 0        | 1        | 2        |                                                      |     |      |      |          |     |     |           |                   |  |
| A*68:129                                                | 68:129              | HLA12936 |                                               | 0        | 0        | 1        | 0        | 0        | 0        | 0        | 1        |                                                      |     |      |      |          |     |     |           |                   |  |
| A*68:132                                                | 68:132              | HLA12943 |                                               | 0        | 0        | 0        | 0        | 0        | 0        | 1        | 1        |                                                      |     |      |      |          |     |     |           |                   |  |
| A*68:133                                                | 68:133              | HLA13439 |                                               | 1        | 0        | 0        | 0        | 0        | 0        | 0        | 1        |                                                      |     |      |      |          |     |     |           |                   |  |
| A*68:134                                                | 68:134              | HLA13725 |                                               | 0        | 1        | 0        | 0        | 0        | 0        | 0        | 1        |                                                      |     |      |      |          |     |     |           |                   |  |

| Supplemental Table 8: HLA-A Allele Summary <sup>a</sup> |                        |          | Allele Count by Population Group <sup>b</sup> |              |             |              |             |             |            |             |              | 3.0.0 CIWD Category by Population Group <sup>c</sup> |          |          |          |          |           |          |          |                   |          |
|---------------------------------------------------------|------------------------|----------|-----------------------------------------------|--------------|-------------|--------------|-------------|-------------|------------|-------------|--------------|------------------------------------------------------|----------|----------|----------|----------|-----------|----------|----------|-------------------|----------|
| Allele                                                  | Genomic Typing         | AlleleID | G group                                       | AFA          | API         | EURO         | MENA        | HIS         | NAM        | UNK         | Total        | AFA                                                  | API      | EURO     | MENA     | HIS      | NAM       | UNK      | Total    | Highest Frequency |          |
| A*68:136                                                | 68:136                 | HLA13839 |                                               | 0            | 0           | 1            | 0           | 0           | 0          | 0           | 1            |                                                      |          |          |          |          |           |          |          |                   |          |
| A*68:139                                                | 68:139                 | HLA14223 |                                               | 0            | 0           | 1            | 0           | 0           | 0          | 0           | 1            |                                                      |          |          |          |          |           |          |          |                   |          |
| A*68:140                                                | 68:140                 | HLA14400 |                                               | 1            | 0           | 0            | 0           | 0           | 0          | 0           | 1            |                                                      |          |          |          |          |           |          |          |                   |          |
| A*68:146                                                | 68:146                 | HLA14909 |                                               | 0            | 1           | 0            | 0           | 0           | 0          | 0           | 1            |                                                      |          |          |          |          |           |          |          |                   |          |
| A*68:148Q                                               | 68:148Q                | HLA15237 |                                               | 0            | 0           | 3            | 0           | 0           | 0          | 0           | 3            |                                                      |          |          |          |          |           |          |          |                   |          |
| A*68:155                                                | 68:155                 | HLA15874 |                                               | 0            | 0           | 1            | 0           | 0           | 0          | 0           | 1            |                                                      |          |          |          |          |           |          |          |                   |          |
| A*68:157                                                | 68:157                 | HLA15952 |                                               | 0            | 1           | 0            | 0           | 0           | 0          | 0           | 1            |                                                      |          |          |          |          |           |          |          |                   |          |
| A*68:158                                                | 68:158                 | HLA16084 |                                               | 0            | 0           | 0            | 1           | 0           | 0          | 0           | 1            |                                                      |          |          |          |          |           |          |          |                   |          |
| A*68:159Q                                               | 68:159Q                | HLA16120 |                                               | 0            | 0           | 2            | 0           | 0           | 0          | 0           | 2            |                                                      |          |          |          |          |           |          |          |                   |          |
| A*68:161                                                | 68:161                 | HLA16449 |                                               | 0            | 1           | 0            | 0           | 0           | 0          | 0           | 1            |                                                      |          |          |          |          |           |          |          |                   |          |
| A*68:CODE                                               | 68:CODE                |          |                                               | 3800         | 1152        | 39780        | 875         | 5414        | 493        | 6315        | 57829        | NA                                                   | NA       | NA       | NA       | NA       | NA        | NA       | NA       | NA                | NA       |
| <b>A*69:01 total</b>                                    | <b>69:01 total</b>     |          |                                               | <b>168</b>   | <b>381</b>  | <b>13446</b> | <b>2767</b> | <b>2089</b> | <b>133</b> | <b>4969</b> | <b>23953</b> | <b>C</b>                                             | <b>C</b> | <b>C</b> | <b>C</b> | <b>C</b> | <b>C</b>  | <b>C</b> | <b>C</b> | <b>C</b>          | <b>C</b> |
| A*69:01                                                 | 69:01                  |          |                                               | 160          | 347         | 13000        | 2701        | 1970        | 128        | 4597        | 22903        | C                                                    | C        | C        | C        | C        | C         | C        | C        | C                 | C        |
| A*69:01P                                                | 69:01P                 |          |                                               | 0            | 0           | 9            | 1           | 0           | 0          | 4           | 14           |                                                      |          | WD       |          |          |           |          | WD       | WD                | WD       |
| <b>A*69:01:01G total</b>                                | <b>69:01:01G total</b> |          |                                               | <b>8</b>     | <b>34</b>   | <b>436</b>   | <b>65</b>   | <b>119</b>  | <b>5</b>   | <b>368</b>  | <b>1035</b>  | <b>WD</b>                                            | <b>I</b> | <b>I</b> | <b>C</b> | <b>C</b> | <b>WD</b> | <b>C</b> | <b>I</b> | <b>C</b>          | <b>C</b> |
| A*69:01:01G                                             | 69:01:01G              |          | 69:01:01G                                     | 3            | 33          | 280          | 0           | 64          | 1          | 119         | 500          |                                                      | I        | I        |          | I        |           | I        | I        | I                 | I        |
| A*69:01:01                                              | 69:01:01               |          | 69:01:01G                                     | 3            | 0           | 107          | 56          | 34          | 2          | 237         | 439          |                                                      |          | WD       | C        | I        |           | C        | I        | C                 | C        |
| A*69:01:01:01                                           | 69:01:01:01            | HLA00126 | 69:01:01G                                     | 2            | 1           | 49           | 9           | 20          | 2          | 12          | 95           |                                                      |          | WD       | WD       | I        |           | WD       | WD       | I                 | I        |
| A*69:01:01:02                                           | 69:01:01:02            | HLA16440 | 69:01:01G                                     | 0            | 0           | 0            | 0           | 1           | 0          | 0           | 1            |                                                      |          |          |          |          |           |          |          |                   |          |
| A*69:01:02                                              | 69:01:02               | HLA15518 |                                               | 0            | 0           | 1            | 0           | 0           | 0          | 0           | 1            |                                                      |          |          |          |          |           |          |          |                   |          |
| A*69:02                                                 | 69:02                  | HLA09785 |                                               | 0            | 0           | 1            | 0           | 0           | 0          | 0           | 1            |                                                      |          |          |          |          |           |          |          |                   |          |
| A*69:CODE                                               | 69:CODE                |          |                                               | 8            | 23          | 1335         | 151         | 55          | 0          | 67          | 1639         | NA                                                   | NA       | NA       | NA       | NA       | NA        | NA       | NA       | NA                | NA       |
| <b>A*74:01 total</b>                                    | <b>74:01 total</b>     |          |                                               | <b>18880</b> | <b>1521</b> | <b>1976</b>  | <b>794</b>  | <b>3587</b> | <b>641</b> | <b>4867</b> | <b>32266</b> | <b>C</b>                                             | <b>C</b> | <b>C</b> | <b>C</b> | <b>C</b> | <b>C</b>  | <b>C</b> | <b>C</b> | <b>C</b>          | <b>C</b> |
| A*74:01                                                 | 74:01                  |          |                                               | 2067         | 10          | 76           | 7           | 480         | 122        | 527         | 3289         | C                                                    | WD       | WD       | WD       | C        | C         | C        | C        | C                 | C        |
| A*74:01P                                                | 74:01P                 |          |                                               | 1            | 0           | 12           | 0           | 1           | 0          | 1           | 15           |                                                      |          | WD       |          |          |           |          | WD       | WD                | WD       |
| <b>A*74:01:01G total</b>                                | <b>74:01:01G total</b> |          |                                               | <b>16812</b> | <b>1511</b> | <b>1888</b>  | <b>787</b>  | <b>3106</b> | <b>519</b> | <b>4339</b> | <b>28962</b> | <b>C</b>                                             | <b>C</b> | <b>C</b> | <b>C</b> | <b>C</b> | <b>C</b>  | <b>C</b> | <b>C</b> | <b>C</b>          | <b>C</b> |
| A*74:01:01G                                             | 74:01:01G              |          | 74:01:01G                                     | 14795        | 1354        | 1811         | 779         | 2576        | 448        | 3909        | 25672        | C                                                    | C        | C        | C        | C        | C         | C        | C        | C                 | C        |
| A*74:01:01                                              | 74:01:01               | HLA00127 | 74:01:01G                                     | 2012         | 23          | 75           | 7           | 529         | 69         | 414         | 3129         | C                                                    | I        | WD       | WD       | C        | C         | C        | C        | C                 | C        |
| <b>A*74:02 total</b>                                    | <b>74:02 total</b>     |          |                                               | <b>5</b>     | <b>134</b>  | <b>2</b>     | <b>1</b>    | <b>1</b>    | <b>2</b>   | <b>16</b>   | <b>161</b>   | <b>WD</b>                                            | <b>C</b> |          |          |          |           | <b>I</b> | <b>I</b> | <b>C</b>          | <b>C</b> |
| A*74:02:01                                              | 74:02:01               |          | 74:01:01G                                     | 2            | 53          | 0            | 0           | 0           | 0          | 12          | 67           |                                                      | I        |          |          |          |           | WD       | WD       | I                 | I        |

| Supplemental Table 8: HLA-A Allele Summary <sup>a</sup> |                        |          | Allele Count by Population Group <sup>b</sup> |             |           |             |            |             |            |             |             | 3.0.0 CIWD Category by Population Group <sup>c</sup> |          |          |          |          |          |          |           |                   |
|---------------------------------------------------------|------------------------|----------|-----------------------------------------------|-------------|-----------|-------------|------------|-------------|------------|-------------|-------------|------------------------------------------------------|----------|----------|----------|----------|----------|----------|-----------|-------------------|
| Allele                                                  | Genomic Typing         | AlleleID | G group                                       | AFA         | API       | EURO        | MENA       | HIS         | NAM        | UNK         | Total       | AFA                                                  | API      | EURO     | MENA     | HIS      | NAM      | UNK      | Total     | Highest Frequency |
| A*74:02:01:02                                           | 74:02:01:02            | HLA05527 | 74:01:01G                                     | 3           | 81        | 2           | 1          | 1           | 2          | 4           | 94          |                                                      | I        |          |          |          |          |          | WD        | I                 |
| A*74:03                                                 | 74:03                  | HLA00129 |                                               | 358         | 98        | 4571        | 507        | 107         | 6          | 304         | 5951        | C                                                    | I        | C        | C        | C        | WD       | C        | C         | C                 |
| A*74:04                                                 | 74:04                  | HLA01115 |                                               | 2           | 0         | 0           | 0          | 0           | 0          | 0           | 2           |                                                      |          |          |          |          |          |          |           |                   |
| A*74:05                                                 | 74:05                  | HLA01254 |                                               | 0           | 48        | 6           | 1          | 0           | 0          | 4           | 59          |                                                      | I        | WD       |          |          |          |          | WD        | I                 |
| A*74:06                                                 | 74:06                  | HLA01422 |                                               | 2           | 0         | 252         | 0          | 3           | 0          | 15          | 272         |                                                      |          | I        |          |          |          | I        | I         | I                 |
| A*74:07                                                 | 74:07                  | HLA01519 |                                               | 0           | 0         | 4           | 0          | 0           | 0          | 2           | 6           |                                                      |          |          |          |          |          |          | WD        | WD                |
| A*74:08                                                 | 74:08                  | HLA01544 |                                               | 0           | 0         | 1           | 0          | 9           | 0          | 0           | 10          |                                                      |          |          |          | I        |          |          | WD        | I                 |
| A*74:09                                                 | 74:09                  | HLA01653 |                                               | 126         | 2         | 5           | 0          | 6           | 0          | 26          | 165         | C                                                    |          | WD       |          | WD       |          | I        | I         | C                 |
| A*74:10                                                 | 74:10                  | HLA01819 |                                               | 5           | 0         | 0           | 0          | 0           | 0          | 2           | 7           | WD                                                   |          |          |          |          |          |          | WD        | WD                |
| A*74:11                                                 | 74:11                  | HLA02254 |                                               | 207         | 1         | 7           | 0          | 12          | 6          | 36          | 269         | C                                                    |          | WD       |          | I        | WD       | I        | I         | C                 |
| A*74:13                                                 | 74:13                  | HLA03499 |                                               | 2           | 1         | 2           | 0          | 0           | 0          | 4           | 9           |                                                      |          |          |          |          |          |          | WD        | WD                |
| A*74:14N                                                | 74:14N                 | HLA03771 |                                               | 0           | 0         | 3           | 0          | 0           | 0          | 0           | 3           |                                                      |          |          |          |          |          |          |           |                   |
| <b>A*74:16 total</b>                                    | <b>74:16 total</b>     |          |                                               | <b>12</b>   | <b>0</b>  | <b>1</b>    | <b>0</b>   | <b>0</b>    | <b>0</b>   | <b>2</b>    | <b>15</b>   | <b>WD</b>                                            |          |          |          |          |          |          | <b>WD</b> | <b>WD</b>         |
| A*74:16                                                 | 74:16                  |          |                                               | 4           | 0         | 0           | 0          | 0           | 0          | 0           | 4           |                                                      |          |          |          |          |          |          |           |                   |
| A*74:16:01                                              | 74:16:01               | HLA08280 |                                               | 4           | 0         | 1           | 0          | 0           | 0          | 0           | 5           |                                                      |          |          |          |          |          |          | WD        | WD                |
| A*74:16:02                                              | 74:16:02               | HLA11218 |                                               | 4           | 0         | 0           | 0          | 0           | 0          | 2           | 6           |                                                      |          |          |          |          |          |          | WD        | WD                |
| A*74:17                                                 | 74:17                  | HLA08456 |                                               | 2           | 0         | 0           | 0          | 0           | 0          | 1           | 3           |                                                      |          |          |          |          |          |          |           |                   |
| A*74:18                                                 | 74:18                  | HLA10117 |                                               | 1           | 0         | 0           | 0          | 0           | 0          | 1           | 2           |                                                      |          |          |          |          |          |          |           |                   |
| A*74:19                                                 | 74:19                  | HLA10137 |                                               | 0           | 0         | 0           | 0          | 1           | 0          | 0           | 1           |                                                      |          |          |          |          |          |          |           |                   |
| A*74:20                                                 | 74:20                  | HLA10390 |                                               | 1           | 0         | 0           | 0          | 0           | 0          | 0           | 1           |                                                      |          |          |          |          |          |          |           |                   |
| A*74:22                                                 | 74:22                  | HLA11315 |                                               | 2           | 0         | 0           | 0          | 0           | 0          | 0           | 2           |                                                      |          |          |          |          |          |          |           |                   |
| A*74:24                                                 | 74:24                  | HLA12957 |                                               | 0           | 0         | 1           | 0          | 0           | 0          | 0           | 1           |                                                      |          |          |          |          |          |          |           |                   |
| A*74:CODE                                               | 74:CODE                |          |                                               | 1150        | 48        | 260         | 11         | 256         | 47         | 259         | 2031        | NA                                                   | NA       | NA       | NA       | NA       | NA       | NA       | NA        | NA                |
| <b>A*80:01 total</b>                                    | <b>80:01 total</b>     |          |                                               | <b>2764</b> | <b>25</b> | <b>1778</b> | <b>225</b> | <b>1176</b> | <b>149</b> | <b>1164</b> | <b>7281</b> | <b>C</b>                                             | <b>I</b> | <b>C</b> | <b>C</b> | <b>C</b> | <b>C</b> | <b>C</b> | <b>C</b>  | <b>C</b>          |
| <b>A*80:01:01G total</b>                                | <b>80:01:01G total</b> |          |                                               | <b>2764</b> | <b>25</b> | <b>1778</b> | <b>225</b> | <b>1176</b> | <b>149</b> | <b>1164</b> | <b>7281</b> | <b>C</b>                                             | <b>I</b> | <b>C</b> | <b>C</b> | <b>C</b> | <b>C</b> | <b>C</b> | <b>C</b>  | <b>C</b>          |
| A*80:01                                                 | 80:01                  |          |                                               | 907         | 6         | 358         | 29         | 345         | 47         | 244         | 1936        | C                                                    | WD       | I        | WD       | C        | C        | C        | C         | C                 |
| A*80:01:01G                                             | 80:01:01G              |          | 80:01:01G                                     | 601         | 6         | 1147        | 158        | 243         | 7          | 430         | 2592        | C                                                    | WD       | I        | C        | C        | C        | C        | C         | C                 |
| A*80:01P                                                | 80:01P                 |          |                                               | 0           | 0         | 2           | 0          | 0           | 0          | 0           | 2           |                                                      |          |          |          |          |          |          |           |                   |
| A*80:01:01                                              | 80:01:01               |          | 80:01:01G                                     | 927         | 7         | 226         | 35         | 401         | 63         | 381         | 2040        | C                                                    | WD       | I        | WD       | C        | C        | C        | C         | C                 |
| A*80:01:01:01                                           | 80:01:01:01            | HLA00130 | 80:01:01G                                     | 2           | 0         | 0           | 0          | 1           | 0          | 0           | 3           |                                                      |          |          |          |          |          |          |           |                   |

| Supplemental Table 8: HLA-A Allele Summary <sup>a</sup> |                |          | Allele Count by Population Group <sup>b</sup> |               |                |                 |               |               |              |                |                 | 3.0.0 CIWD Category by Population Group <sup>c</sup> |     |      |      |     |     |     |       |                   |
|---------------------------------------------------------|----------------|----------|-----------------------------------------------|---------------|----------------|-----------------|---------------|---------------|--------------|----------------|-----------------|------------------------------------------------------|-----|------|------|-----|-----|-----|-------|-------------------|
| Allele                                                  | Genomic Typing | AlleleID | G group                                       | AFA           | API            | EURO            | MENA          | HIS           | NAM          | UNK            | Total           | AFA                                                  | API | EURO | MENA | HIS | NAM | UNK | Total | Highest Frequency |
| A*80:01:01:02                                           | 80:01:01:02    | HLA08791 | 80:01:01G                                     | 327           | 6              | 45              | 3             | 186           | 32           | 109            | 708             | C                                                    | WD  | WD   |      | C   | C   | I   | I     | C                 |
| A*80:CODE                                               | 80:CODE        |          |                                               | 3             | 0              | 26              | 0             | 15            | 2            | 10             | 56              | NA                                                   | NA  | NA   | NA   | NA  | NA  | NA  | NA    | NA                |
| A*NEW <sup>d</sup>                                      | NEW            |          |                                               | 0             | 1              | 3               | 0             | 0             | 0            | 0              | 4               | NA                                                   | NA  | NA   | NA   | NA  | NA  | NA  | NA    | NA                |
| <b>A*Total <sup>e</sup></b>                             | <b>Total</b>   |          |                                               | <b>388476</b> | <b>1291125</b> | <b>11929417</b> | <b>402447</b> | <b>700632</b> | <b>66971</b> | <b>1320493</b> | <b>16099561</b> |                                                      |     |      |      |     |     |     |       |                   |

C, common; I, intermediate; WD, well-documented; NA, not applicable

<sup>a</sup> All alleles observed in the current dataset are included in this table. Note that alleles are not in numerical order; alleles within a G group are clustered together. P group "two-field" total (e.g., written as "A\*01:01 total") and G group total summary rows are provided. The table does not list all alleles from IPD-IMGT version 3.31.0, if not present in the study dataset.

<sup>b</sup> Population groups include: AFA (African/African American), API (Asian/Pacific Islands), EURO (European/European descent), MENA (Middle East/North Coast of Africa), HIS (South or Central America/Hispanic/Latino), NAM (Native American populations) and UNK (unknown/not asked/multiple ancestries/other). Total is the overall population i.e., all groups combined.

<sup>c</sup> Allele frequency is calculated by dividing the number of times the "allele" of interest is observed in a population by the total number of copies of all the alleles at that particular genetic locus in the population (reported as the last row in this table and also in Table 2b). The total number of copies is calculated by multiplying the number of individuals times two for all loci except DRB3/4/5. For DRB3/4/5, the number of assignments was used as the total. The CIWD status is determined based on the allele frequency. Allele frequency data will be provided on the website of the next International HLA and Immunogenetics Workshop (<https://www.ihw18.org/>). Highest frequency is the highest CIWD designation among all the individual groups.

<sup>d</sup> "CODE" is generically defined as a summary category of submitted HLA typing, including NMDP multiple allele codes, with ambiguities that are not within a single P or G group. "NEW" is a summary category for assignments of novel alleles that did not yet receive a nomenclature assignment. The CODE and NEW categories add to the total number of alleles but should not be assigned CIWD designations (labeled as NA, not applicable) as they do not represent a consistent allele designation (i.e., the NEW category may contain alleles with different DNA sequences that are unrelated to one another).

<sup>e</sup> A\*Total is the total number of allele assignments for the population group and is based on two times the number of individuals in the group. This number is also listed in Table 2b. It is not the sum of the column as alleles are not counted more than once. For example, when evaluating frequencies at the level of G resolution, individual alleles that make up the G group (e.g., A\*80:01:01, A\*80:01:01:01, A\*80:01:01:02, A\*80:01:01G) are not included in the count because these alleles are summed up in the total G designation (e.g., "A\*80:01:01G total").
