# Supplementary material for: Common, intermediate and well‐documented HLA alleles in world populations: CIWD version 3.0.0
Source: PubMed Central journal article supplement (PMC7317522; doi:10.1111/tan.13811), 2020-01-31
Supplement: TAN-95-516-s009.pdf [file TAN-95-516-s009.pdf]

| Supplemental Table 9: HLA-B Allele Summary <sup>a</sup> |                        |           | Allele Count by Population Group <sup>b</sup> |              |              |                |              |              |             |               |                | 3.0.0 CIWD Category by Population Group <sup>c</sup> |     |      |      |     |     |     |       |                   |
|---------------------------------------------------------|------------------------|-----------|-----------------------------------------------|--------------|--------------|----------------|--------------|--------------|-------------|---------------|----------------|------------------------------------------------------|-----|------|------|-----|-----|-----|-------|-------------------|
| Allele                                                  | Genomic typing         | Allele ID | G group                                       | AFA          | API          | EURO           | MENA         | HIS          | NAM         | UNK           | Total          | AFA                                                  | API | EURO | MENA | HIS | NAM | UNK | Total | Highest Frequency |
| <b>B*07:02 total</b>                                    | <b>07:02 total</b>     |           |                                               | <b>26182</b> | <b>48874</b> | <b>1398284</b> | <b>14506</b> | <b>37930</b> | <b>4127</b> | <b>115074</b> | <b>1644977</b> | C                                                    | C   | C    | C    | C   | C   | C   | C     | C                 |
| B*07:02                                                 | 07:02                  |           |                                               | 4            | 2            | 4073           | 8            | 12           | 0           | 157           | 4256           |                                                      |     | C    | WD   | I   |     | C   | C     | C                 |
| B*07:02P                                                | 07:02P                 |           |                                               | 1            | 3            | 754            | 3            | 4            | 0           | 3             | 768            |                                                      |     | I    |      |     |     |     | I     | I                 |
| <b>B*07:02:01G total</b>                                | <b>07:02:01G total</b> |           |                                               | <b>26160</b> | <b>48865</b> | <b>1392994</b> | <b>14479</b> | <b>37907</b> | <b>4126</b> | <b>114707</b> | <b>1639238</b> | C                                                    | C   | C    | C    | C   | C   | C   | C     | C                 |
| B*07:02:01G                                             | 07:02:01G              |           | 07:02:01G                                     | 21684        | 46303        | 1332475        | 14129        | 29042        | 3293        | 106417        | 1553343        | C                                                    | C   | C    | C    | C   | C   | C   | C     | C                 |
| B*07:02:01                                              | 07:02:01               |           | 07:02:01G                                     | 4091         | 2358         | 54459          | 327          | 8027         | 770         | 7519          | 77551          | C                                                    | C   | C    | C    | C   | C   | C   | C     | C                 |
| B*07:02:01:01                                           | 07:02:01:01            | HLA00132  | 07:02:01G                                     | 384          | 203          | 5971           | 23           | 832          | 63          | 758           | 8234           | C                                                    | C   | C    | WD   | C   | C   | C   | C     | C                 |
| B*07:02:01:02                                           | 07:02:01:02            | HLA16169  | 07:02:01G                                     | 0            | 0            | 1              | 0            | 0            | 0           | 0             | 1              |                                                      |     |      |      |     |     |     |       |                   |
| B*07:02:01:04                                           | 07:02:01:04            | HLA16855  | 07:02:01G                                     | 0            | 0            | 9              | 0            | 0            | 0           | 1             | 10             |                                                      |     | WD   |      |     |     |     | WD    | WD                |
| B*07:02:01:07                                           | 07:02:01:07            | HLA17071  | 07:02:01G                                     | 0            | 0            | 6              | 0            | 1            | 0           | 1             | 8              |                                                      |     | WD   |      |     |     |     | WD    | WD                |
| B*07:02:06                                              | 07:02:06               | HLA02990  | 07:02:01G                                     | 0            | 0            | 5              | 0            | 0            | 0           | 0             | 5              |                                                      |     | WD   |      |     |     |     | WD    | WD                |
| B*07:02:45                                              | 07:02:45               | HLA12872  | 07:02:01G                                     | 1            | 1            | 58             | 0            | 2            | 0           | 7             | 69             |                                                      |     | WD   |      |     |     | WD  | WD    | WD                |
| B*07:44N                                                | 07:44N                 | HLA02350  | 07:02:01G                                     | 0            | 0            | 0              | 0            | 2            | 0           | 1             | 3              |                                                      |     |      |      |     |     |     |       |                   |
| B*07:59                                                 | 07:59                  | HLA02991  | 07:02:01G                                     | 0            | 0            | 3              | 0            | 0            | 0           | 0             | 3              |                                                      |     |      |      |     |     |     |       |                   |
| B*07:61                                                 | 07:61                  | HLA03166  | 07:02:01G                                     | 0            | 0            | 0              | 0            | 0            | 0           | 1             | 1              |                                                      |     |      |      |     |     |     |       |                   |
| B*07:120                                                | 07:120                 | HLA06131  | 07:02:01G                                     | 0            | 0            | 7              | 0            | 0            | 0           | 1             | 8              |                                                      |     | WD   |      |     |     |     | WD    | WD                |
| B*07:129                                                | 07:129                 | HLA06658  | 07:02:01G                                     | 0            | 0            | 0              | 0            | 0            | 0           | 1             | 1              |                                                      |     |      |      |     |     |     |       |                   |
| B*07:282                                                | 07:282                 | HLA15577  | 07:02:01G                                     | 0            | 0            | 0              | 0            | 1            | 0           | 0             | 1              |                                                      |     |      |      |     |     |     |       |                   |
| B*07:02:02                                              | 07:02:02               | HLA00133  |                                               | 0            | 0            | 7              | 0            | 0            | 0           | 0             | 7              |                                                      |     | WD   |      |     |     |     | WD    | WD                |
| B*07:02:03                                              | 07:02:03               | HLA00134  |                                               | 12           | 1            | 124            | 1            | 7            | 0           | 5             | 150            | WD                                                   |     | I    |      | WD  |     | WD  | WD    | I                 |
| B*07:02:04                                              | 07:02:04               | HLA01763  |                                               | 0            | 0            | 81             | 0            | 1            | 0           | 191           | 273            |                                                      |     | WD   |      |     |     | C   | I     | C                 |
| B*07:02:05                                              | 07:02:05               | HLA02949  |                                               | 0            | 0            | 7              | 0            | 0            | 0           | 0             | 7              |                                                      |     | WD   |      |     |     |     | WD    | WD                |
| B*07:02:07                                              | 07:02:07               | HLA03089  |                                               | 0            | 0            | 55             | 0            | 0            | 0           | 0             | 55             |                                                      |     | WD   |      |     |     |     | WD    | WD                |
| B*07:02:08                                              | 07:02:08               | HLA03720  |                                               | 0            | 0            | 8              | 0            | 0            | 0           | 0             | 8              |                                                      |     | WD   |      |     |     |     | WD    | WD                |
| B*07:02:10                                              | 07:02:10               | HLA03900  |                                               | 0            | 0            | 47             | 0            | 0            | 1           | 2             | 50             |                                                      |     | WD   |      |     |     |     | WD    | WD                |
| B*07:02:11                                              | 07:02:11               | HLA03938  |                                               | 0            | 0            | 1              | 0            | 1            | 0           | 1             | 3              |                                                      |     |      |      |     |     |     |       |                   |
| B*07:02:12                                              | 07:02:12               | HLA04042  |                                               | 0            | 0            | 3              | 0            | 0            | 0           | 0             | 3              |                                                      |     |      |      |     |     |     |       |                   |
| B*07:02:13                                              | 07:02:13               | HLA04058  |                                               | 5            | 0            | 18             | 4            | 0            | 0           | 1             | 28             | WD                                                   |     | WD   |      |     |     |     | WD    | WD                |
| B*07:02:14                                              | 07:02:14               | HLA04113  |                                               | 0            | 0            | 8              | 0            | 0            | 0           | 0             | 8              |                                                      |     | WD   |      |     |     |     | WD    | WD                |
| B*07:02:15                                              | 07:02:15               | HLA04191  |                                               | 0            | 0            | 2              | 0            | 0            | 0           | 0             | 2              |                                                      |     |      |      |     |     |     |       |                   |
| B*07:02:16                                              | 07:02:16               | HLA04198  |                                               | 0            | 0            | 3              | 0            | 0            | 0           | 0             | 3              |                                                      |     |      |      |     |     |     |       |                   |

| Supplemental Table 9: HLA-B Allele Summary <sup>a</sup> |                        |           | Allele Count by Population Group <sup>b</sup> |             |              |              |             |             |            |             |              | 3.0.0 CIWD Category by Population Group <sup>c</sup> |          |          |          |          |          |          |          |                   |
|---------------------------------------------------------|------------------------|-----------|-----------------------------------------------|-------------|--------------|--------------|-------------|-------------|------------|-------------|--------------|------------------------------------------------------|----------|----------|----------|----------|----------|----------|----------|-------------------|
| Allele                                                  | Genomic typing         | Allele ID | G group                                       | AFA         | API          | EURO         | MENA        | HIS         | NAM        | UNK         | Total        | AFA                                                  | API      | EURO     | MENA     | HIS      | NAM      | UNK      | Total    | Highest Frequency |
| B*07:02:17                                              | 07:02:17               | HLA04238  |                                               | 0           | 0            | 0            | 11          | 0           | 0          | 0           | 11           |                                                      |          |          | WD       |          |          |          | WD       | WD                |
| B*07:02:18                                              | 07:02:18               | HLA04246  |                                               | 0           | 2            | 0            | 0           | 0           | 0          | 0           | 2            |                                                      |          |          |          |          |          |          |          |                   |
| B*07:02:19                                              | 07:02:19               | HLA04571  |                                               | 0           | 0            | 1            | 0           | 0           | 0          | 1           | 2            |                                                      |          |          |          |          |          |          |          |                   |
| B*07:02:20                                              | 07:02:20               | HLA05253  |                                               | 0           | 0            | 1            | 0           | 0           | 0          | 0           | 1            |                                                      |          |          |          |          |          |          |          |                   |
| B*07:02:21                                              | 07:02:21               | HLA06678  |                                               | 0           | 0            | 16           | 0           | 0           | 0          | 1           | 17           |                                                      |          | WD       |          |          |          |          | WD       | WD                |
| B*07:02:22                                              | 07:02:22               | HLA06679  |                                               | 0           | 0            | 1            | 0           | 0           | 0          | 0           | 1            |                                                      |          |          |          |          |          |          |          |                   |
| B*07:02:23                                              | 07:02:23               | HLA06702  |                                               | 0           | 0            | 5            | 0           | 0           | 0          | 0           | 5            |                                                      |          | WD       |          |          |          |          | WD       | WD                |
| B*07:02:24                                              | 07:02:24               | HLA06703  |                                               | 0           | 0            | 1            | 0           | 0           | 0          | 0           | 1            |                                                      |          |          |          |          |          |          |          |                   |
| B*07:02:27                                              | 07:02:27               | HLA06924  |                                               | 0           | 0            | 19           | 0           | 0           | 0          | 0           | 19           |                                                      |          | WD       |          |          |          |          | WD       | WD                |
| B*07:02:28                                              | 07:02:28               | HLA06981  |                                               | 0           | 0            | 5            | 0           | 0           | 0          | 1           | 6            |                                                      |          | WD       |          |          |          |          | WD       | WD                |
| B*07:02:29                                              | 07:02:29               | HLA07207  |                                               | 0           | 0            | 1            | 0           | 0           | 0          | 0           | 1            |                                                      |          |          |          |          |          |          |          |                   |
| B*07:02:30                                              | 07:02:30               | HLA07467  |                                               | 0           | 0            | 1            | 0           | 0           | 0          | 0           | 1            |                                                      |          |          |          |          |          |          |          |                   |
| B*07:02:33                                              | 07:02:33               | HLA08136  |                                               | 0           | 0            | 4            | 0           | 0           | 0          | 0           | 4            |                                                      |          |          |          |          |          |          |          |                   |
| B*07:02:34                                              | 07:02:34               | HLA08379  |                                               | 0           | 1            | 2            | 0           | 0           | 0          | 0           | 3            |                                                      |          |          |          |          |          |          |          |                   |
| B*07:02:35                                              | 07:02:35               | HLA08385  |                                               | 0           | 0            | 3            | 0           | 0           | 0          | 0           | 3            |                                                      |          |          |          |          |          |          |          |                   |
| B*07:02:36                                              | 07:02:36               | HLA08685  |                                               | 0           | 0            | 4            | 0           | 0           | 0          | 0           | 4            |                                                      |          |          |          |          |          |          |          |                   |
| B*07:02:37                                              | 07:02:37               | HLA08686  |                                               | 0           | 0            | 0            | 0           | 0           | 0          | 2           | 2            |                                                      |          |          |          |          |          |          |          |                   |
| B*07:02:42                                              | 07:02:42               | HLA11839  |                                               | 0           | 0            | 0            | 0           | 0           | 0          | 1           | 1            |                                                      |          |          |          |          |          |          |          |                   |
| B*07:02:43                                              | 07:02:43               | HLA12017  |                                               | 0           | 0            | 10           | 0           | 0           | 0          | 0           | 10           |                                                      |          | WD       |          |          |          |          | WD       | WD                |
| B*07:02:46                                              | 07:02:46               | HLA13018  |                                               | 0           | 0            | 0            | 0           | 0           | 0          | 1           | 1            |                                                      |          |          |          |          |          |          |          |                   |
| B*07:02:48                                              | 07:02:48               | HLA13791  |                                               | 0           | 0            | 1            | 0           | 0           | 0          | 0           | 1            |                                                      |          |          |          |          |          |          |          |                   |
| B*07:252                                                | 07:252                 | HLA13341  |                                               | 0           | 0            | 24           | 0           | 0           | 0          | 1           | 25           |                                                      |          | WD       |          |          |          |          | WD       | WD                |
| B*07:03                                                 | 07:03                  | HLA00135  |                                               | 0           | 1            | 233          | 0           | 5           | 0          | 15          | 254          |                                                      |          | I        |          | WD       |          | I        | I        | I                 |
| B*07:04                                                 | 07:04                  | HLA00136  |                                               | 13          | 11           | 13038        | 17          | 45          | 3          | 175         | 13302        | WD                                                   | WD       | C        | WD       | I        |          | C        | C        | C                 |
| <b>B*07:05 total</b>                                    | <b>07:05 total</b>     |           |                                               | <b>3147</b> | <b>41501</b> | <b>33895</b> | <b>5028</b> | <b>3360</b> | <b>307</b> | <b>9358</b> | <b>96596</b> | <b>C</b>                                             | <b>C</b> | <b>C</b> | <b>C</b> | <b>C</b> | <b>C</b> | <b>C</b> | <b>C</b> | <b>C</b>          |
| B*07:05                                                 | 07:05                  |           |                                               | 0           | 4            | 282          | 2           | 0           | 0          | 42          | 330          |                                                      |          | I        |          |          |          | I        | I        | I                 |
| B*07:05P                                                | 07:05P                 |           |                                               | 1           | 3            | 127          | 2           | 1           | 0          | 0           | 134          |                                                      |          | I        |          |          |          |          | WD       | I                 |
| <b>B*07:05:01G total</b>                                | <b>07:05:01G total</b> |           |                                               | <b>2936</b> | <b>41133</b> | <b>33306</b> | <b>5020</b> | <b>3160</b> | <b>283</b> | <b>9199</b> | <b>95037</b> | <b>C</b>                                             | <b>C</b> | <b>C</b> | <b>C</b> | <b>C</b> | <b>C</b> | <b>C</b> | <b>C</b> | <b>C</b>          |
| B*07:05:01G                                             | 07:05:01G              |           | 07:05:01G                                     | 2615        | 39424        | 31904        | 4882        | 2576        | 231        | 8803        | 90435        | C                                                    | C        | C        | C        | C        | C        | C        | C        | C                 |
| B*07:05:01                                              | 07:05:01               |           | 07:05:01G                                     | 17          | 609          | 551          | 81          | 126         | 11         | 109         | 1504         | WD                                                   | C        | I        | C        | C        | C        | I        | I        | C                 |
| B*07:05:01:01                                           | 07:05:01:01            | HLA00137  | 07:05:01G                                     | 34          | 526          | 567          | 52          | 114         | 6          | 105         | 1404         | WD                                                   | C        | I        | C        | C        | WD       | I        | I        | C                 |

| Supplemental Table 9: HLA-B Allele Summary <sup>a</sup> |                    |           | Allele Count by Population Group <sup>b</sup> |            |            |            |          |            |           |            |             | 3.0.0 CIWD Category by Population Group <sup>c</sup> |          |           |           |          |          |          |           |                   |
|---------------------------------------------------------|--------------------|-----------|-----------------------------------------------|------------|------------|------------|----------|------------|-----------|------------|-------------|------------------------------------------------------|----------|-----------|-----------|----------|----------|----------|-----------|-------------------|
| Allele                                                  | Genomic typing     | Allele ID | G group                                       | AFA        | API        | EURO       | MENA     | HIS        | NAM       | UNK        | Total       | AFA                                                  | API      | EURO      | MENA      | HIS      | NAM      | UNK      | Total     | Highest Frequency |
| B*07:05:01:04                                           | 07:05:01:04        | HLA16875  | 07:05:01G                                     | 0          | 1          | 0          | 0        | 0          | 0         | 0          | 1           |                                                      |          |           |           |          |          |          |           |                   |
| B*07:06:01                                              | 07:06:01           | HLA00138  | 07:05:01G                                     | 270        | 573        | 284        | 5        | 344        | 35        | 182        | 1693        | C                                                    | C        | I         | WD        | C        | C        | C        | C         | C                 |
| B*07:05:02                                              | 07:05:02           | HLA02317  |                                               | 0          | 0          | 40         | 0        | 0          | 0         | 2          | 42          |                                                      |          | WD        |           |          |          |          | WD        | WD                |
| B*07:05:05                                              | 07:05:05           | HLA05390  |                                               | 0          | 0          | 1          | 0        | 0          | 0         | 0          | 1           |                                                      |          |           |           |          |          |          |           |                   |
| B*07:05:07                                              | 07:05:07           | HLA11838  |                                               | 0          | 0          | 2          | 0        | 0          | 0         | 0          | 2           |                                                      |          |           |           |          |          |          |           |                   |
| B*07:05:08                                              | 07:05:08           | HLA12310  |                                               | 0          | 11         | 0          | 0        | 0          | 0         | 0          | 11          |                                                      | WD       |           |           |          |          |          | WD        | WD                |
| <b>B*07:06 total</b>                                    | <b>07:06 total</b> |           |                                               | <b>480</b> | <b>923</b> | <b>421</b> | <b>9</b> | <b>543</b> | <b>59</b> | <b>297</b> | <b>2732</b> | <b>C</b>                                             | <b>C</b> | <b>I</b>  | <b>WD</b> | <b>C</b> | <b>C</b> | <b>C</b> | <b>C</b>  | <b>C</b>          |
| B*07:06                                                 | 07:06              |           |                                               | 210        | 344        | 137        | 4        | 199        | 24        | 115        | 1033        | C                                                    | C        | I         |           | C        | C        | I        | I         | C                 |
| B*07:06:02                                              | 07:06:02           | HLA14776  |                                               | 0          | 6          | 0          | 0        | 0          | 0         | 0          | 6           |                                                      | WD       |           |           |          |          |          | WD        | WD                |
| B*07:07                                                 | 07:07              | HLA00139  |                                               | 6          | 2          | 413        | 6        | 13         | 1         | 20         | 461         | WD                                                   |          | I         | WD        | I        |          | I        | I         | I                 |
| <b>B*07:08 total</b>                                    | <b>07:08 total</b> |           |                                               | <b>0</b>   | <b>0</b>   | <b>64</b>  | <b>0</b> | <b>1</b>   | <b>0</b>  | <b>1</b>   | <b>66</b>   |                                                      |          | <b>WD</b> |           |          |          |          | <b>WD</b> | <b>WD</b>         |
| B*07:08                                                 | 07:08              |           |                                               | 0          | 0          | 59         | 0        | 1          | 0         | 1          | 61          |                                                      |          | WD        |           |          |          |          | WD        | WD                |
| B*07:08:01                                              | 07:08:01           | HLA00140  |                                               | 0          | 0          | 5          | 0        | 0          | 0         | 0          | 5           |                                                      |          | WD        |           |          |          |          | WD        | WD                |
| B*07:09                                                 | 07:09              | HLA00141  |                                               | 136        | 19         | 625        | 3        | 35         | 17        | 70         | 905         | C                                                    | I        | I         |           | I        | C        | I        | I         | C                 |
| B*07:10                                                 | 07:10              | HLA00142  |                                               | 12         | 16         | 1264       | 119      | 24         | 2         | 153        | 1590        | WD                                                   | I        | C         | C         | I        |          | C        | I         | C                 |
| B*07:12                                                 | 07:12              | HLA00144  |                                               | 54         | 0          | 0          | 0        | 2          | 0         | 12         | 68          | C                                                    |          |           |           |          |          | WD       | WD        | C                 |
| B*07:13                                                 | 07:13              | HLA00145  |                                               | 13         | 0          | 0          | 0        | 0          | 2         | 3          | 18          | WD                                                   |          |           |           |          |          |          | WD        | WD                |
| B*07:14                                                 | 07:14              | HLA01049  |                                               | 3          | 0          | 686        | 50       | 80         | 5         | 63         | 887         |                                                      |          | I         | C         | C        | WD       | I        | I         | C                 |
| B*07:15                                                 | 07:15              | HLA01050  |                                               | 1          | 0          | 410        | 1        | 0          | 0         | 13         | 425         |                                                      |          | I         |           |          |          | WD       | I         | I                 |
| B*07:16                                                 | 07:16              | HLA01051  |                                               | 0          | 0          | 20         | 0        | 0          | 1         | 2          | 23          |                                                      |          | WD        |           |          |          |          | WD        | WD                |
| B*07:17                                                 | 07:17              | HLA01110  |                                               | 0          | 0          | 2          | 0        | 0          | 0         | 4          | 6           |                                                      |          |           |           |          |          |          | WD        | WD                |
| <b>B*07:18 total</b>                                    | <b>07:18 total</b> |           |                                               | <b>0</b>   | <b>42</b>  | <b>4</b>   | <b>0</b> | <b>1</b>   | <b>0</b>  | <b>2</b>   | <b>49</b>   |                                                      | <b>I</b> |           |           |          |          |          | <b>WD</b> | <b>I</b>          |
| B*07:18                                                 | 07:18              |           |                                               | 0          | 1          | 1          | 0        | 0          | 0         | 0          | 2           |                                                      |          |           |           |          |          |          |           |                   |
| B*07:18:01                                              | 07:18:01           | HLA01116  |                                               | 0          | 41         | 1          | 0        | 0          | 0         | 2          | 44          |                                                      | I        |           |           |          |          |          | WD        | I                 |
| B*07:18:02                                              | 07:18:02           | HLA03088  |                                               | 0          | 0          | 2          | 0        | 1          | 0         | 0          | 3           |                                                      |          |           |           |          |          |          |           |                   |
| B*07:19                                                 | 07:19              | HLA01176  |                                               | 0          | 0          | 7          | 0        | 1          | 0         | 2          | 10          |                                                      |          | WD        |           |          |          |          | WD        | WD                |
| B*07:20                                                 | 07:20              | HLA01184  |                                               | 0          | 0          | 17         | 0        | 27         | 1         | 5          | 50          |                                                      |          | WD        |           | I        |          | WD       | WD        | I                 |
| B*07:21                                                 | 07:21              | HLA01253  |                                               | 0          | 0          | 2          | 0        | 0          | 0         | 1          | 3           |                                                      |          |           |           |          |          |          |           |                   |
| <b>B*07:22 total</b>                                    | <b>07:22 total</b> |           |                                               | <b>3</b>   | <b>1</b>   | <b>104</b> | <b>0</b> | <b>1</b>   | <b>1</b>  | <b>24</b>  | <b>134</b>  |                                                      |          | <b>WD</b> |           |          |          | <b>I</b> | <b>WD</b> | <b>I</b>          |
| B*07:22                                                 | 07:22              |           |                                               | 0          | 0          | 18         | 0        | 0          | 0         | 2          | 20          |                                                      |          | WD        |           |          |          |          | WD        | WD                |
| B*07:22:01                                              | 07:22:01           | HLA01257  |                                               | 2          | 1          | 56         | 0        | 1          | 0         | 16         | 76          |                                                      |          | WD        |           |          |          | I        | WD        | I                 |

| Supplemental Table 9: HLA-B Allele Summary <sup>a</sup> |                        |           | Allele Count by Population Group <sup>b</sup> |          |          |           |          |          |          |           |           | 3.0.0 CIWD Category by Population Group <sup>c</sup> |           |           |      |     |     |           |           |                   |
|---------------------------------------------------------|------------------------|-----------|-----------------------------------------------|----------|----------|-----------|----------|----------|----------|-----------|-----------|------------------------------------------------------|-----------|-----------|------|-----|-----|-----------|-----------|-------------------|
| Allele                                                  | Genomic typing         | Allele ID | G group                                       | AFA      | API      | EURO      | MENA     | HIS      | NAM      | UNK       | Total     | AFA                                                  | API       | EURO      | MENA | HIS | NAM | UNK       | Total     | Highest Frequency |
| B*07:22:02                                              | 07:22:02               | HLA03260  |                                               | 1        | 0        | 30        | 0        | 0        | 1        | 6         | 38        |                                                      |           | WD        |      |     |     | WD        | WD        | WD                |
| B*07:23                                                 | 07:23                  | HLA01286  |                                               | 2        | 0        | 25        | 1        | 0        | 0        | 7         | 35        |                                                      |           | WD        |      |     |     | WD        | WD        | WD                |
| B*07:24                                                 | 07:24                  | HLA01293  |                                               | 0        | 0        | 5         | 0        | 0        | 0        | 4         | 9         |                                                      |           | WD        |      |     |     |           | WD        | WD                |
| B*07:26                                                 | 07:26                  | HLA01362  |                                               | 0        | 5        | 98        | 0        | 12       | 1        | 5         | 121       | WD                                                   | WD        |           | I    |     |     | WD        | WD        | I                 |
| B*07:27                                                 | 07:27                  | HLA01435  |                                               | 0        | 0        | 1         | 0        | 0        | 0        | 0         | 1         |                                                      |           |           |      |     |     |           |           |                   |
| B*07:28                                                 | 07:28                  | HLA01516  |                                               | 0        | 0        | 1         | 0        | 0        | 0        | 0         | 1         |                                                      |           |           |      |     |     |           |           |                   |
| B*07:29                                                 | 07:29                  | HLA01548  |                                               | 0        | 0        | 3         | 0        | 0        | 0        | 3         | 6         |                                                      |           |           |      |     |     |           | WD        | WD                |
| B*07:30                                                 | 07:30                  | HLA01577  |                                               | 0        | 1        | 1         | 0        | 0        | 0        | 0         | 2         |                                                      |           |           |      |     |     |           |           |                   |
| B*07:31                                                 | 07:31                  | HLA01618  |                                               | 2        | 0        | 17        | 0        | 0        | 0        | 4         | 23        |                                                      |           | WD        |      |     |     |           | WD        | WD                |
| <b>B*07:33 total</b>                                    | <b>07:33 total</b>     |           |                                               | <b>2</b> | <b>9</b> | <b>26</b> | <b>0</b> | <b>0</b> | <b>0</b> | <b>0</b>  | <b>37</b> | <b>WD</b>                                            | <b>WD</b> |           |      |     |     | <b>WD</b> | <b>WD</b> | <b>WD</b>         |
| B*07:33                                                 | 07:33                  |           |                                               | 1        | 2        | 15        | 0        | 0        | 0        | 0         | 18        |                                                      |           | WD        |      |     |     |           | WD        | WD                |
| B*07:33:01                                              | 07:33:01               | HLA01742  |                                               | 1        | 0        | 10        | 0        | 0        | 0        | 0         | 11        |                                                      |           | WD        |      |     |     |           | WD        | WD                |
| B*07:33:02                                              | 07:33:02               | HLA09701  |                                               | 0        | 5        | 0         | 0        | 0        | 0        | 0         | 5         | WD                                                   |           |           |      |     |     |           | WD        | WD                |
| B*07:33:03                                              | 07:33:03               | HLA11035  |                                               | 0        | 2        | 1         | 0        | 0        | 0        | 0         | 3         |                                                      |           |           |      |     |     |           |           |                   |
| B*07:36                                                 | 07:36                  | HLA01808  |                                               | 0        | 8        | 21        | 1        | 1        | 0        | 9         | 40        | WD                                                   | WD        |           |      |     |     | WD        | WD        | WD                |
| <b>B*07:37 total</b>                                    | <b>07:37 total</b>     |           |                                               | <b>0</b> | <b>0</b> | <b>32</b> | <b>0</b> | <b>0</b> | <b>0</b> | <b>28</b> | <b>60</b> |                                                      |           | <b>WD</b> |      |     |     | <b>I</b>  | <b>WD</b> | <b>I</b>          |
| <b>B*07:37:01G total</b>                                | <b>07:37:01G total</b> |           |                                               | <b>0</b> | <b>0</b> | <b>32</b> | <b>0</b> | <b>0</b> | <b>0</b> | <b>28</b> | <b>60</b> |                                                      |           | <b>WD</b> |      |     |     | <b>I</b>  | <b>WD</b> | <b>I</b>          |
| B*07:37                                                 | 07:37                  |           | 07:37:01G                                     | 0        | 0        | 32        | 0        | 0        | 0        | 28        | 60        |                                                      |           | WD        |      |     |     | I         | WD        | I                 |
| B*07:38                                                 | 07:38                  | HLA01883  |                                               | 0        | 1        | 72        | 0        | 0        | 0        | 0         | 73        |                                                      |           | WD        |      |     |     |           | WD        | WD                |
| B*07:39                                                 | 07:39                  | HLA02089  |                                               | 0        | 0        | 1         | 0        | 0        | 0        | 0         | 1         |                                                      |           |           |      |     |     |           |           |                   |
| B*07:42                                                 | 07:42                  | HLA02175  |                                               | 1        | 0        | 53        | 0        | 1        | 0        | 13        | 68        |                                                      |           | WD        |      |     |     | WD        | WD        | WD                |
| B*07:43                                                 | 07:43                  | HLA02247  |                                               | 0        | 2        | 0         | 0        | 0        | 0        | 0         | 2         |                                                      |           |           |      |     |     |           |           |                   |
| B*07:46                                                 | 07:46                  | HLA02446  |                                               | 0        | 0        | 10        | 0        | 0        | 0        | 19        | 29        |                                                      |           | WD        |      |     |     | I         | WD        | I                 |
| B*07:47                                                 | 07:47                  | HLA02463  |                                               | 0        | 0        | 373       | 0        | 0        | 0        | 6         | 379       |                                                      |           | I         |      |     |     | WD        | I         | I                 |
| B*07:48                                                 | 07:48                  | HLA02514  |                                               | 0        | 3        | 13        | 37       | 0        | 0        | 1         | 54        |                                                      |           | WD        | WD   |     |     |           | WD        | WD                |
| B*07:51                                                 | 07:51                  | HLA02713  |                                               | 0        | 0        | 6         | 0        | 15       | 2        | 1         | 24        |                                                      |           | WD        |      | I   |     |           | WD        | I                 |
| B*07:52                                                 | 07:52                  | HLA02796  |                                               | 0        | 0        | 1         | 0        | 0        | 0        | 0         | 1         |                                                      |           |           |      |     |     |           |           |                   |
| B*07:53                                                 | 07:53                  | HLA02805  |                                               | 0        | 0        | 10        | 0        | 0        | 0        | 0         | 10        |                                                      |           | WD        |      |     |     |           | WD        | WD                |
| B*07:54                                                 | 07:54                  | HLA02844  |                                               | 0        | 1        | 1         | 0        | 0        | 0        | 0         | 2         |                                                      |           |           |      |     |     |           |           |                   |
| B*07:55                                                 | 07:55                  | HLA02873  |                                               | 0        | 0        | 1         | 0        | 0        | 0        | 0         | 1         |                                                      |           |           |      |     |     |           |           |                   |
| <b>B*07:56 total</b>                                    | <b>07:56 total</b>     |           |                                               | <b>0</b> | <b>0</b> | <b>4</b>  | <b>0</b> | <b>0</b> | <b>0</b> | <b>7</b>  | <b>11</b> |                                                      |           |           |      |     |     | <b>WD</b> | <b>WD</b> | <b>WD</b>         |

| Supplemental Table 9: HLA-B Allele Summary <sup>a</sup> |                    |           | Allele Count by Population Group <sup>b</sup> |          |          |           |          |          |          |          |           | 3.0.0 CIWD Category by Population Group <sup>c</sup> |     |           |      |     |     |     |           |                   |
|---------------------------------------------------------|--------------------|-----------|-----------------------------------------------|----------|----------|-----------|----------|----------|----------|----------|-----------|------------------------------------------------------|-----|-----------|------|-----|-----|-----|-----------|-------------------|
| Allele                                                  | Genomic typing     | Allele ID | G group                                       | AFA      | API      | EURO      | MENA     | HIS      | NAM      | UNK      | Total     | AFA                                                  | API | EURO      | MENA | HIS | NAM | UNK | Total     | Highest Frequency |
| B*07:56                                                 | 07:56              |           |                                               | 0        | 0        | 1         | 0        | 0        | 0        | 0        | 1         |                                                      |     |           |      |     |     |     |           |                   |
| B*07:56:01                                              | 07:56:01           | HLA02910  |                                               | 0        | 0        | 1         | 0        | 0        | 0        | 0        | 1         |                                                      |     |           |      |     |     |     |           |                   |
| B*07:56:02                                              | 07:56:02           | HLA07464  |                                               | 0        | 0        | 2         | 0        | 0        | 0        | 7        | 9         |                                                      |     |           |      |     |     | WD  | WD        | WD                |
| B*07:57                                                 | 07:57              | HLA02968  |                                               | 1        | 2        | 19        | 0        | 0        | 0        | 3        | 25        |                                                      |     | WD        |      |     |     |     | WD        | WD                |
| B*07:62                                                 | 07:62              | HLA03179  |                                               | 0        | 0        | 71        | 0        | 0        | 0        | 1        | 72        |                                                      |     | WD        |      |     |     |     | WD        | WD                |
| B*07:63                                                 | 07:63              | HLA03237  |                                               | 0        | 0        | 32        | 0        | 0        | 0        | 2        | 34        |                                                      |     | WD        |      |     |     |     | WD        | WD                |
| B*07:64                                                 | 07:64              | HLA03264  |                                               | 0        | 0        | 2         | 0        | 0        | 0        | 1        | 3         |                                                      |     |           |      |     |     |     |           |                   |
| B*07:66                                                 | 07:66              | HLA03342  |                                               | 0        | 0        | 1         | 0        | 0        | 0        | 0        | 1         |                                                      |     |           |      |     |     |     |           |                   |
| B*07:67N                                                | 07:67N             | HLA03413  |                                               | 0        | 0        | 18        | 0        | 0        | 0        | 0        | 18        |                                                      |     | WD        |      |     |     |     | WD        | WD                |
| <b>B*07:68 total</b>                                    | <b>07:68 total</b> |           |                                               | <b>0</b> | <b>4</b> | <b>60</b> | <b>0</b> | <b>1</b> | <b>0</b> | <b>3</b> | <b>68</b> |                                                      |     | <b>WD</b> |      |     |     |     | <b>WD</b> | <b>WD</b>         |
| B*07:68                                                 | 07:68              |           |                                               | 0        | 2        | 10        | 0        | 0        | 0        | 0        | 12        |                                                      |     | WD        |      |     |     |     | WD        | WD                |
| B*07:68:01                                              | 07:68:01           | HLA03514  |                                               | 0        | 0        | 35        | 0        | 0        | 0        | 2        | 37        |                                                      |     | WD        |      |     |     |     | WD        | WD                |
| B*07:68:02                                              | 07:68:02           | HLA05222  |                                               | 0        | 1        | 11        | 0        | 0        | 0        | 0        | 12        |                                                      |     | WD        |      |     |     |     | WD        | WD                |
| B*07:68:03                                              | 07:68:03           | HLA06826  |                                               | 0        | 1        | 4         | 0        | 1        | 0        | 1        | 7         |                                                      |     |           |      |     |     |     | WD        | WD                |
| B*07:70                                                 | 07:70              | HLA03610  |                                               | 0        | 0        | 2         | 0        | 0        | 0        | 1        | 3         |                                                      |     |           |      |     |     |     |           |                   |
| B*07:71                                                 | 07:71              | HLA03611  |                                               | 0        | 4        | 1         | 0        | 0        | 0        | 2        | 7         |                                                      |     |           |      |     |     |     | WD        | WD                |
| B*07:72                                                 | 07:72              | HLA03622  |                                               | 0        | 0        | 2         | 0        | 0        | 0        | 0        | 2         |                                                      |     |           |      |     |     |     |           |                   |
| B*07:73                                                 | 07:73              | HLA03658  |                                               | 0        | 0        | 25        | 0        | 0        | 0        | 0        | 25        |                                                      |     | WD        |      |     |     |     | WD        | WD                |
| B*07:74                                                 | 07:74              | HLA03660  |                                               | 0        | 0        | 17        | 0        | 0        | 0        | 0        | 17        |                                                      |     | WD        |      |     |     |     | WD        | WD                |
| B*07:76                                                 | 07:76              | HLA03692  |                                               | 0        | 0        | 0         | 0        | 0        | 0        | 1        | 1         |                                                      |     |           |      |     |     |     |           |                   |
| B*07:77                                                 | 07:77              | HLA03761  |                                               | 0        | 0        | 2         | 5        | 0        | 0        | 0        | 7         |                                                      |     |           | WD   |     |     |     | WD        | WD                |
| B*07:80                                                 | 07:80              | HLA03936  |                                               | 0        | 12       | 1         | 0        | 0        | 0        | 0        | 13        |                                                      | WD  |           |      |     |     |     | WD        | WD                |
| B*07:81                                                 | 07:81              | HLA03937  |                                               | 0        | 6        | 0         | 1        | 0        | 0        | 0        | 7         |                                                      | WD  |           |      |     |     |     | WD        | WD                |
| B*07:82                                                 | 07:82              | HLA03940  |                                               | 0        | 2        | 0         | 0        | 0        | 0        | 0        | 2         |                                                      |     |           |      |     |     |     |           |                   |
| B*07:85                                                 | 07:85              | HLA04074  |                                               | 0        | 3        | 1         | 0        | 1        | 0        | 0        | 5         |                                                      |     |           |      |     |     |     | WD        | WD                |
| B*07:86                                                 | 07:86              | HLA04079  |                                               | 0        | 0        | 9         | 0        | 0        | 1        | 1        | 11        |                                                      |     | WD        |      |     |     |     | WD        | WD                |
| B*07:87                                                 | 07:87              | HLA04092  |                                               | 0        | 0        | 39        | 0        | 1        | 0        | 2        | 42        |                                                      |     | WD        |      |     |     |     | WD        | WD                |
| B*07:88                                                 | 07:88              | HLA04097  |                                               | 0        | 0        | 60        | 0        | 1        | 1        | 1        | 63        |                                                      |     | WD        |      |     |     |     | WD        | WD                |
| B*07:89                                                 | 07:89              | HLA04099  |                                               | 0        | 0        | 0         | 0        | 0        | 0        | 2        | 2         |                                                      |     |           |      |     |     |     |           |                   |
| B*07:90                                                 | 07:90              | HLA04109  |                                               | 0        | 0        | 4         | 0        | 0        | 0        | 0        | 4         |                                                      |     |           |      |     |     |     |           |                   |
| B*07:91                                                 | 07:91              | HLA03981  |                                               | 0        | 0        | 1         | 0        | 0        | 0        | 0        | 1         |                                                      |     |           |      |     |     |     |           |                   |

| Supplemental Table 9: HLA-B Allele Summary <sup>a</sup> |                    |           | Allele Count by Population Group <sup>b</sup> |          |          |          |          |          |          |          |          | 3.0.0 CIWD Category by Population Group <sup>c</sup> |     |           |      |     |     |     |           |                   |
|---------------------------------------------------------|--------------------|-----------|-----------------------------------------------|----------|----------|----------|----------|----------|----------|----------|----------|------------------------------------------------------|-----|-----------|------|-----|-----|-----|-----------|-------------------|
| Allele                                                  | Genomic typing     | Allele ID | G group                                       | AFA      | API      | EURO     | MENA     | HIS      | NAM      | UNK      | Total    | AFA                                                  | API | EURO      | MENA | HIS | NAM | UNK | Total     | Highest Frequency |
| B*07:92                                                 | 07:92              | HLA04172  |                                               | 0        | 1        | 37       | 0        | 1        | 0        | 3        | 42       |                                                      |     | WD        |      |     |     |     | WD        | WD                |
| B*07:93                                                 | 07:93              | HLA04193  |                                               | 0        | 0        | 1        | 0        | 0        | 0        | 0        | 1        |                                                      |     |           |      |     |     |     |           |                   |
| B*07:94                                                 | 07:94              | HLA04219  |                                               | 0        | 4        | 2        | 0        | 0        | 0        | 1        | 7        |                                                      |     |           |      |     |     |     | WD        | WD                |
| B*07:95                                                 | 07:95              | HLA04233  |                                               | 0        | 0        | 20       | 0        | 0        | 0        | 1        | 21       |                                                      |     | WD        |      |     |     |     | WD        | WD                |
| <b>B*07:96 total</b>                                    | <b>07:96 total</b> |           |                                               | <b>0</b> | <b>0</b> | <b>7</b> | <b>0</b> | <b>0</b> | <b>0</b> | <b>0</b> | <b>7</b> |                                                      |     | <b>WD</b> |      |     |     |     | <b>WD</b> | <b>WD</b>         |
| B*07:96:01                                              | 07:96:01           | HLA04241  |                                               | 0        | 0        | 7        | 0        | 0        | 0        | 0        | 7        |                                                      |     | WD        |      |     |     |     | WD        | WD                |
| B*07:97                                                 | 07:97              | HLA04243  |                                               | 0        | 1        | 1        | 0        | 0        | 0        | 0        | 2        |                                                      |     |           |      |     |     |     |           |                   |
| B*07:98                                                 | 07:98              | HLA04248  |                                               | 0        | 0        | 25       | 0        | 0        | 0        | 0        | 25       |                                                      |     | WD        |      |     |     |     | WD        | WD                |
| B*07:99                                                 | 07:99              | HLA04250  |                                               | 0        | 0        | 1        | 0        | 0        | 0        | 0        | 1        |                                                      |     |           |      |     |     |     |           |                   |
| B*07:101                                                | 07:101             | HLA04924  |                                               | 0        | 0        | 1        | 0        | 0        | 0        | 0        | 1        |                                                      |     |           |      |     |     |     |           |                   |
| B*07:102                                                | 07:102             | HLA04925  |                                               | 0        | 0        | 9        | 0        | 1        | 0        | 0        | 10       |                                                      |     | WD        |      |     |     |     | WD        | WD                |
| B*07:103                                                | 07:103             | HLA04929  |                                               | 6        | 0        | 0        | 0        | 0        | 0        | 0        | 6        | WD                                                   |     |           |      |     |     |     | WD        | WD                |
| B*07:104                                                | 07:104             | HLA04931  |                                               | 0        | 0        | 4        | 0        | 1        | 0        | 0        | 5        |                                                      |     |           |      |     |     |     | WD        | WD                |
| B*07:105                                                | 07:105             | HLA04933  |                                               | 0        | 9        | 0        | 0        | 0        | 0        | 1        | 10       |                                                      | WD  |           |      |     |     |     | WD        | WD                |
| B*07:106                                                | 07:106             | HLA04935  |                                               | 0        | 0        | 3        | 10       | 0        | 0        | 0        | 13       |                                                      |     |           | WD   |     |     |     | WD        | WD                |
| B*07:108                                                | 07:108             | HLA04966  |                                               | 0        | 0        | 3        | 0        | 0        | 0        | 0        | 3        |                                                      |     |           |      |     |     |     |           |                   |
| B*07:109                                                | 07:109             | HLA04981  |                                               | 0        | 0        | 22       | 0        | 0        | 0        | 0        | 22       |                                                      |     | WD        |      |     |     |     | WD        | WD                |
| B*07:110                                                | 07:110             | HLA04993  |                                               | 0        | 0        | 5        | 0        | 0        | 0        | 0        | 5        |                                                      |     | WD        |      |     |     |     | WD        | WD                |
| B*07:111N                                               | 07:111N            | HLA05000  |                                               | 0        | 0        | 0        | 0        | 0        | 0        | 1        | 1        |                                                      |     |           |      |     |     |     |           |                   |
| B*07:112                                                | 07:112             | HLA04884  |                                               | 0        | 0        | 8        | 0        | 0        | 0        | 2        | 10       |                                                      |     | WD        |      |     |     |     | WD        | WD                |
| B*07:113                                                | 07:113             | HLA04886  |                                               | 0        | 0        | 6        | 0        | 0        | 0        | 2        | 8        |                                                      |     | WD        |      |     |     |     | WD        | WD                |
| B*07:114                                                | 07:114             | HLA05094  |                                               | 0        | 0        | 1        | 0        | 0        | 0        | 1        | 2        |                                                      |     |           |      |     |     |     |           |                   |
| B*07:117                                                | 07:117             | HLA05531  |                                               | 0        | 0        | 0        | 1        | 0        | 0        | 0        | 1        |                                                      |     |           |      |     |     |     |           |                   |
| B*07:118                                                | 07:118             | HLA06041  |                                               | 0        | 0        | 0        | 0        | 2        | 1        | 1        | 4        |                                                      |     |           |      |     |     |     |           |                   |
| B*07:122                                                | 07:122             | HLA06224  |                                               | 0        | 0        | 7        | 0        | 0        | 0        | 0        | 7        |                                                      |     | WD        |      |     |     |     | WD        | WD                |
| B*07:123                                                | 07:123             | HLA06225  |                                               | 0        | 1        | 0        | 0        | 0        | 0        | 0        | 1        |                                                      |     |           |      |     |     |     |           |                   |
| B*07:125                                                | 07:125             | HLA06317  |                                               | 0        | 0        | 1        | 0        | 0        | 0        | 0        | 1        |                                                      |     |           |      |     |     |     |           |                   |
| B*07:126                                                | 07:126             | HLA06318  |                                               | 0        | 0        | 1        | 0        | 0        | 0        | 0        | 1        |                                                      |     |           |      |     |     |     |           |                   |
| B*07:127                                                | 07:127             | HLA06319  |                                               | 0        | 0        | 4        | 0        | 0        | 0        | 0        | 4        |                                                      |     |           |      |     |     |     |           |                   |
| B*07:131                                                | 07:131             | HLA06677  |                                               | 0        | 0        | 10       | 0        | 0        | 0        | 0        | 10       |                                                      |     | WD        |      |     |     |     | WD        | WD                |
| B*07:132                                                | 07:132             | HLA06690  |                                               | 0        | 0        | 6        | 0        | 0        | 0        | 0        | 6        |                                                      |     | WD        |      |     |     |     | WD        | WD                |

| Supplemental Table 9: HLA-B Allele Summary <sup>a</sup> |                     |           | Allele Count by Population Group <sup>b</sup> |          |          |           |          |          |          |          |           | 3.0.0 CIWD Category by Population Group <sup>c</sup> |     |           |      |     |     |     |           |                   |
|---------------------------------------------------------|---------------------|-----------|-----------------------------------------------|----------|----------|-----------|----------|----------|----------|----------|-----------|------------------------------------------------------|-----|-----------|------|-----|-----|-----|-----------|-------------------|
| Allele                                                  | Genomic typing      | Allele ID | G group                                       | AFA      | API      | EURO      | MENA     | HIS      | NAM      | UNK      | Total     | AFA                                                  | API | EURO      | MENA | HIS | NAM | UNK | Total     | Highest Frequency |
| B*07:133                                                | 07:133              | HLA06691  |                                               | 0        | 0        | 0         | 0        | 0        | 0        | 1        | 1         |                                                      |     |           |      |     |     |     |           |                   |
| <b>B*07:136 total</b>                                   | <b>07:136 total</b> |           |                                               | <b>0</b> | <b>1</b> | <b>19</b> | <b>0</b> | <b>1</b> | <b>0</b> | <b>0</b> | <b>21</b> |                                                      |     | <b>WD</b> |      |     |     |     | <b>WD</b> | <b>WD</b>         |
| B*07:136                                                | 07:136              |           |                                               | 0        | 0        | 9         | 0        | 0        | 0        | 0        | 9         |                                                      |     | WD        |      |     |     |     | WD        | WD                |
| B*07:136:01                                             | 07:136:01           | HLA06970  |                                               | 0        | 0        | 10        | 0        | 0        | 0        | 0        | 10        |                                                      |     | WD        |      |     |     |     | WD        | WD                |
| B*07:136:02                                             | 07:136:02           | HLA12570  |                                               | 0        | 1        | 0         | 0        | 1        | 0        | 0        | 2         |                                                      |     |           |      |     |     |     |           |                   |
| B*07:143                                                | 07:143              | HLA07305  |                                               | 0        | 2        | 2         | 5        | 0        | 0        | 1        | 10        |                                                      |     |           | WD   |     |     |     | WD        | WD                |
| B*07:145                                                | 07:145              | HLA07465  |                                               | 0        | 0        | 0         | 0        | 0        | 0        | 1        | 1         |                                                      |     |           |      |     |     |     |           |                   |
| B*07:147                                                | 07:147              | HLA07468  |                                               | 0        | 0        | 2         | 0        | 0        | 0        | 0        | 2         |                                                      |     |           |      |     |     |     |           |                   |
| B*07:148                                                | 07:148              | HLA07469  |                                               | 0        | 0        | 1         | 0        | 0        | 0        | 0        | 1         |                                                      |     |           |      |     |     |     |           |                   |
| B*07:149                                                | 07:149              | HLA07659  |                                               | 0        | 0        | 2         | 0        | 0        | 0        | 0        | 2         |                                                      |     |           |      |     |     |     |           |                   |
| <b>B*07:151 total</b>                                   | <b>07:151 total</b> |           |                                               | <b>0</b> | <b>0</b> | <b>9</b>  | <b>1</b> | <b>0</b> | <b>0</b> | <b>0</b> | <b>10</b> |                                                      |     | <b>WD</b> |      |     |     |     | <b>WD</b> | <b>WD</b>         |
| B*07:151                                                | 07:151              |           |                                               | 0        | 0        | 4         | 1        | 0        | 0        | 0        | 5         |                                                      |     |           |      |     |     |     | WD        | WD                |
| B*07:151:01                                             | 07:151:01           | HLA07662  |                                               | 0        | 0        | 5         | 0        | 0        | 0        | 0        | 5         |                                                      |     | WD        |      |     |     |     | WD        | WD                |
| B*07:153                                                | 07:153              | HLA07723  |                                               | 0        | 0        | 2         | 0        | 0        | 0        | 0        | 2         |                                                      |     |           |      |     |     |     |           |                   |
| B*07:154                                                | 07:154              | HLA07724  |                                               | 0        | 0        | 1         | 0        | 0        | 0        | 0        | 1         |                                                      |     |           |      |     |     |     |           |                   |
| B*07:157                                                | 07:157              | HLA08134  |                                               | 0        | 0        | 3         | 0        | 0        | 0        | 0        | 3         |                                                      |     |           |      |     |     |     |           |                   |
| B*07:158                                                | 07:158              | HLA08135  |                                               | 0        | 0        | 3         | 0        | 2        | 0        | 0        | 5         |                                                      |     |           |      |     |     |     | WD        | WD                |
| B*07:160                                                | 07:160              | HLA08138  |                                               | 0        | 0        | 3         | 0        | 0        | 0        | 1        | 4         |                                                      |     |           |      |     |     |     |           |                   |
| B*07:163                                                | 07:163              | HLA08380  |                                               | 0        | 0        | 0         | 2        | 0        | 0        | 0        | 2         |                                                      |     |           |      |     |     |     |           |                   |
| B*07:165                                                | 07:165              | HLA08382  |                                               | 0        | 0        | 6         | 0        | 0        | 0        | 0        | 6         |                                                      |     | WD        |      |     |     |     | WD        | WD                |
| B*07:167N                                               | 07:167N             | HLA08384  |                                               | 0        | 0        | 2         | 0        | 0        | 0        | 0        | 2         |                                                      |     |           |      |     |     |     |           |                   |
| B*07:170                                                | 07:170              | HLA08470  |                                               | 0        | 0        | 1         | 0        | 0        | 0        | 0        | 1         |                                                      |     |           |      |     |     |     |           |                   |
| B*07:171                                                | 07:171              | HLA08520  |                                               | 0        | 1        | 1         | 0        | 0        | 0        | 0        | 2         |                                                      |     |           |      |     |     |     |           |                   |
| B*07:172                                                | 07:172              | HLA08521  |                                               | 0        | 0        | 2         | 0        | 0        | 0        | 0        | 2         |                                                      |     |           |      |     |     |     |           |                   |
| B*07:174                                                | 07:174              | HLA08523  |                                               | 0        | 0        | 3         | 0        | 0        | 0        | 0        | 3         |                                                      |     |           |      |     |     |     |           |                   |
| B*07:175                                                | 07:175              | HLA08567  |                                               | 0        | 0        | 3         | 0        | 0        | 0        | 0        | 3         |                                                      |     |           |      |     |     |     |           |                   |
| B*07:176                                                | 07:176              | HLA08684  |                                               | 0        | 0        | 0         | 1        | 0        | 0        | 2        | 3         |                                                      |     |           |      |     |     |     |           |                   |
| B*07:177                                                | 07:177              | HLA08934  |                                               | 0        | 0        | 1         | 0        | 0        | 0        | 0        | 1         |                                                      |     |           |      |     |     |     |           |                   |
| B*07:179                                                | 07:179              | HLA09007  |                                               | 0        | 0        | 1         | 0        | 0        | 0        | 1        | 2         |                                                      |     |           |      |     |     |     |           |                   |
| B*07:181N                                               | 07:181N             | HLA09009  |                                               | 0        | 0        | 5         | 0        | 0        | 0        | 1        | 6         |                                                      |     | WD        |      |     |     |     | WD        | WD                |
| B*07:182N                                               | 07:182N             | HLA09116  |                                               | 0        | 1        | 0         | 0        | 0        | 0        | 0        | 1         |                                                      |     |           |      |     |     |     |           |                   |

| Supplemental Table 9: HLA-B Allele Summary <sup>a</sup> |                |           | Allele Count by Population Group <sup>b</sup> |     |     |      |      |     |     |     |       | 3.0.0 CIWD Category by Population Group <sup>c</sup> |     |      |      |     |     |     |       |                   |
|---------------------------------------------------------|----------------|-----------|-----------------------------------------------|-----|-----|------|------|-----|-----|-----|-------|------------------------------------------------------|-----|------|------|-----|-----|-----|-------|-------------------|
| Allele                                                  | Genomic typing | Allele ID | G group                                       | AFA | API | EURO | MENA | HIS | NAM | UNK | Total | AFA                                                  | API | EURO | MENA | HIS | NAM | UNK | Total | Highest Frequency |
| B*07:187                                                | 07:187         | HLA09443  |                                               | 0   | 0   | 1    | 0    | 0   | 0   | 0   | 1     |                                                      |     |      |      |     |     |     |       |                   |
| B*07:188                                                | 07:188         | HLA09444  |                                               | 0   | 0   | 5    | 0    | 0   | 0   | 0   | 5     |                                                      |     | WD   |      |     |     |     | WD    | WD                |
| B*07:189                                                | 07:189         | HLA09445  |                                               | 0   | 0   | 1    | 0    | 0   | 0   | 0   | 1     |                                                      |     |      |      |     |     |     |       |                   |
| B*07:193                                                | 07:193         | HLA09493  |                                               | 0   | 0   | 7    | 0    | 0   | 0   | 0   | 7     |                                                      |     | WD   |      |     |     |     | WD    | WD                |
| B*07:195                                                | 07:195         | HLA09589  |                                               | 0   | 0   | 1    | 0    | 0   | 0   | 0   | 1     |                                                      |     |      |      |     |     |     |       |                   |
| B*07:197                                                | 07:197         | HLA09591  |                                               | 0   | 0   | 1    | 0    | 0   | 0   | 0   | 1     |                                                      |     |      |      |     |     |     |       |                   |
| B*07:205                                                | 07:205         | HLA10420  |                                               | 1   | 0   | 0    | 0    | 3   | 0   | 0   | 4     |                                                      |     |      |      |     |     |     |       |                   |
| B*07:206                                                | 07:206         | HLA10423  |                                               | 0   | 0   | 7    | 0    | 0   | 0   | 0   | 7     |                                                      |     | WD   |      |     |     |     | WD    | WD                |
| B*07:208                                                | 07:208         | HLA10519  |                                               | 0   | 0   | 9    | 0    | 0   | 0   | 0   | 9     |                                                      |     | WD   |      |     |     |     | WD    | WD                |
| B*07:210                                                | 07:210         | HLA10859  |                                               | 0   | 0   | 0    | 1    | 0   | 0   | 1   | 2     |                                                      |     |      |      |     |     |     |       |                   |
| B*07:211                                                | 07:211         | HLA11036  |                                               | 0   | 3   | 0    | 0    | 0   | 0   | 0   | 3     |                                                      |     |      |      |     |     |     |       |                   |
| B*07:213                                                | 07:213         | HLA11223  |                                               | 0   | 1   | 0    | 0    | 0   | 0   | 0   | 1     |                                                      |     |      |      |     |     |     |       |                   |
| B*07:216                                                | 07:216         | HLA11435  |                                               | 3   | 0   | 0    | 0    | 0   | 0   | 0   | 3     |                                                      |     |      |      |     |     |     |       |                   |
| B*07:217                                                | 07:217         | HLA11446  |                                               | 0   | 0   | 2    | 0    | 0   | 0   | 0   | 2     |                                                      |     |      |      |     |     |     |       |                   |
| B*07:218                                                | 07:218         | HLA11448  |                                               | 0   | 0   | 1    | 0    | 0   | 0   | 0   | 1     |                                                      |     |      |      |     |     |     |       |                   |
| B*07:220                                                | 07:220         | HLA11719  |                                               | 0   | 0   | 1    | 0    | 0   | 0   | 0   | 1     |                                                      |     |      |      |     |     |     |       |                   |
| B*07:221                                                | 07:221         | HLA11735  |                                               | 0   | 0   | 2    | 0    | 0   | 0   | 0   | 2     |                                                      |     |      |      |     |     |     |       |                   |
| B*07:222                                                | 07:222         | HLA11837  |                                               | 0   | 10  | 0    | 0    | 0   | 0   | 0   | 10    |                                                      | WD  |      |      |     |     |     | WD    | WD                |
| B*07:226                                                | 07:226         | HLA12171  |                                               | 0   | 0   | 2    | 0    | 0   | 0   | 0   | 2     |                                                      |     |      |      |     |     |     |       |                   |
| B*07:231N                                               | 07:231N        | HLA12312  |                                               | 0   | 0   | 2    | 0    | 0   | 0   | 0   | 2     |                                                      |     |      |      |     |     |     |       |                   |
| B*07:235                                                | 07:235         | HLA12586  |                                               | 0   | 0   | 1    | 0    | 0   | 0   | 0   | 1     |                                                      |     |      |      |     |     |     |       |                   |
| B*07:237                                                | 07:237         | HLA12686  |                                               | 0   | 0   | 4    | 0    | 0   | 0   | 1   | 5     |                                                      |     |      |      |     |     |     | WD    | WD                |
| B*07:238                                                | 07:238         | HLA12759  |                                               | 0   | 2   | 0    | 0    | 0   | 0   | 0   | 2     |                                                      |     |      |      |     |     |     |       |                   |
| B*07:239                                                | 07:239         | HLA12760  |                                               | 0   | 0   | 2    | 0    | 0   | 0   | 0   | 2     |                                                      |     |      |      |     |     |     |       |                   |
| B*07:243                                                | 07:243         | HLA13016  |                                               | 0   | 0   | 1    | 0    | 0   | 0   | 1   | 2     |                                                      |     |      |      |     |     |     |       |                   |
| B*07:245                                                | 07:245         | HLA13019  |                                               | 0   | 0   | 2    | 0    | 0   | 0   | 0   | 2     |                                                      |     |      |      |     |     |     |       |                   |
| B*07:246                                                | 07:246         | HLA13020  |                                               | 0   | 0   | 1    | 0    | 0   | 0   | 0   | 1     |                                                      |     |      |      |     |     |     |       |                   |
| B*07:247                                                | 07:247         | HLA13022  |                                               | 0   | 1   | 1    | 0    | 0   | 0   | 0   | 2     |                                                      |     |      |      |     |     |     |       |                   |
| B*07:255                                                | 07:255         | HLA13364  |                                               | 0   | 0   | 1    | 0    | 0   | 0   | 0   | 1     |                                                      |     |      |      |     |     |     |       |                   |
| B*07:258                                                | 07:258         | HLA14237  |                                               | 0   | 2   | 0    | 0    | 0   | 0   | 0   | 2     |                                                      |     |      |      |     |     |     |       |                   |
| B*07:261                                                | 07:261         | HLA14402  |                                               | 0   | 0   | 4    | 0    | 0   | 0   | 0   | 4     |                                                      |     |      |      |     |     |     |       |                   |



| Supplemental Table 9: HLA-B Allele Summary <sup>a</sup> |                        |           | Allele Count by Population Group <sup>b</sup> |              |              |                |              |              |             |              |                | 3.0.0 CIWD Category by Population Group <sup>c</sup> |          |          |          |          |          |          |          |                   |
|---------------------------------------------------------|------------------------|-----------|-----------------------------------------------|--------------|--------------|----------------|--------------|--------------|-------------|--------------|----------------|------------------------------------------------------|----------|----------|----------|----------|----------|----------|----------|-------------------|
| Allele                                                  | Genomic typing         | Allele ID | G group                                       | AFA          | API          | EURO           | MENA         | HIS          | NAM         | UNK          | Total          | AFA                                                  | API      | EURO     | MENA     | HIS      | NAM      | UNK      | Total    | Highest Frequency |
| B*07:262                                                | 07:262                 | HLA14448  |                                               | 0            | 4            | 0              | 0            | 0            | 0           | 0            | 4              |                                                      |          |          |          |          |          |          |          |                   |
| B*07:264                                                | 07:264                 | HLA14455  |                                               | 0            | 0            | 2              | 0            | 0            | 0           | 0            | 2              |                                                      |          |          |          |          |          |          |          |                   |
| B*07:270                                                | 07:270                 | HLA15035  |                                               | 0            | 3            | 0              | 0            | 0            | 0           | 0            | 3              |                                                      |          |          |          |          |          |          |          |                   |
| <b>B*07:276 total</b>                                   | <b>07:276 total</b>    |           |                                               | <b>0</b>     | <b>1</b>     | <b>1</b>       | <b>0</b>     | <b>0</b>     | <b>0</b>    | <b>1</b>     | <b>3</b>       |                                                      |          |          |          |          |          |          |          |                   |
| B*07:276:01                                             | 07:276:01              | HLA15468  |                                               | 0            | 1            | 0              | 0            | 0            | 0           | 1            | 2              |                                                      |          |          |          |          |          |          |          |                   |
| B*07:276:02                                             | 07:276:02              | HLA16224  |                                               | 0            | 0            | 1              | 0            | 0            | 0           | 0            | 1              |                                                      |          |          |          |          |          |          |          |                   |
| B*07:281                                                | 07:281                 | HLA15740  |                                               | 0            | 0            | 1              | 0            | 0            | 0           | 0            | 1              |                                                      |          |          |          |          |          |          |          |                   |
| B*07:287                                                | 07:287                 | HLA16056  |                                               | 0            | 1            | 0              | 0            | 0            | 0           | 0            | 1              |                                                      |          |          |          |          |          |          |          |                   |
| B*07:CODE <sup>d</sup>                                  | 07:CODE                |           |                                               | 1848         | 759          | 71557          | 530          | 3751         | 257         | 6511         | 85213          | NA                                                   | NA       | NA       | NA       | NA       | NA       | NA       | NA       | NA                |
| <b>B*08:01 total</b>                                    | <b>08:01 total</b>     |           |                                               | <b>13085</b> | <b>32959</b> | <b>1173858</b> | <b>17335</b> | <b>28475</b> | <b>3088</b> | <b>95155</b> | <b>1363955</b> | <b>C</b>                                             | <b>C</b> | <b>C</b> | <b>C</b> | <b>C</b> | <b>C</b> | <b>C</b> | <b>C</b> | <b>C</b>          |
| B*08:01                                                 | 08:01                  |           |                                               | 598          | 423          | 13098          | 91           | 1655         | 129         | 2696         | 18690          | C                                                    | C        | C        | C        | C        | C        | C        | C        | C                 |
| B*08:01P                                                | 08:01P                 |           |                                               | 0            | 9            | 796            | 6            | 2            | 0           | 6            | 819            |                                                      | WD       | I        | WD       |          |          | WD       | I        | I                 |
| <b>B*08:01:01G total</b>                                | <b>08:01:01G total</b> |           |                                               | <b>12485</b> | <b>32521</b> | <b>1157664</b> | <b>17233</b> | <b>26809</b> | <b>2959</b> | <b>92402</b> | <b>1342073</b> | <b>C</b>                                             | <b>C</b> | <b>C</b> | <b>C</b> | <b>C</b> | <b>C</b> | <b>C</b> | <b>C</b> | <b>C</b>          |
| B*08:01:01G                                             | 08:01:01G              |           | 08:01:01G                                     | 10305        | 30857        | 1104332        | 16863        | 20303        | 2367        | 85907        | 1270934        | C                                                    | C        | C        | C        | C        | C        | C        | C        | C                 |
| B*08:01:01                                              | 08:01:01               |           | 08:01:01G                                     | 1786         | 1364         | 42183          | 321          | 5295         | 482         | 5259         | 56690          | C                                                    | C        | C        | C        | C        | C        | C        | C        | C                 |
| B*08:01:01:01                                           | 08:01:01:01            | HLA00146  | 08:01:01G                                     | 387          | 27           | 10930          | 26           | 1174         | 105         | 1204         | 13853          | C                                                    | I        | C        | WD       | C        | C        | C        | C        | C                 |
| B*08:01:01:02                                           | 08:01:01:02            | HLA14850  | 08:01:01G                                     | 7            | 273          | 150            | 22           | 34           | 4           | 23           | 513            | WD                                                   | C        | I        | WD       | I        |          | I        | I        | C                 |
| B*08:01:01:05                                           | 08:01:01:05            | HLA16876  | 08:01:01G                                     | 0            | 0            | 1              | 0            | 0            | 0           | 0            | 1              |                                                      |          |          |          |          |          |          |          |                   |
| B*08:01:14                                              | 08:01:14               | HLA06132  | 08:01:01G                                     | 0            | 0            | 1              | 0            | 0            | 1           | 1            | 3              |                                                      |          |          |          |          |          |          |          |                   |
| B*08:01:20                                              | 08:01:20               | HLA08776  | 08:01:01G                                     | 0            | 0            | 67             | 1            | 3            | 0           | 8            | 79             |                                                      |          | WD       |          |          |          | WD       | WD       | WD                |
| B*08:01:02                                              | 08:01:02               | HLA02219  |                                               | 1            | 3            | 1683           | 3            | 9            | 0           | 42           | 1741           |                                                      |          | C        |          | I        |          | I        | C        | C                 |
| B*08:01:03                                              | 08:01:03               | HLA02400  |                                               | 0            | 0            | 18             | 0            | 0            | 0           | 1            | 19             |                                                      |          | WD       |          |          |          |          | WD       | WD                |
| B*08:01:04                                              | 08:01:04               | HLA02853  |                                               | 1            | 1            | 451            | 0            | 0            | 0           | 3            | 456            |                                                      |          | I        |          |          |          |          | I        | I                 |
| B*08:01:05                                              | 08:01:05               | HLA03134  |                                               | 0            | 0            | 7              | 0            | 0            | 0           | 0            | 7              |                                                      |          | WD       |          |          |          |          | WD       | WD                |
| B*08:01:06                                              | 08:01:06               | HLA03449  |                                               | 0            | 0            | 32             | 0            | 0            | 0           | 2            | 34             |                                                      |          | WD       |          |          |          |          | WD       | WD                |
| B*08:01:07                                              | 08:01:07               | HLA03939  |                                               | 0            | 0            | 9              | 0            | 0            | 0           | 0            | 9              |                                                      |          | WD       |          |          |          |          | WD       | WD                |
| B*08:01:08                                              | 08:01:08               | HLA04210  |                                               | 0            | 0            | 60             | 0            | 0            | 0           | 0            | 60             |                                                      |          | WD       |          |          |          |          | WD       | WD                |
| B*08:01:10                                              | 08:01:10               | HLA04504  |                                               | 0            | 0            | 2              | 0            | 0            | 0           | 0            | 2              |                                                      |          |          |          |          |          |          |          |                   |
| B*08:01:11                                              | 08:01:11               | HLA05127  |                                               | 0            | 0            | 2              | 1            | 0            | 0           | 0            | 3              |                                                      |          |          |          |          |          |          |          |                   |
| B*08:01:12                                              | 08:01:12               | HLA05362  |                                               | 0            | 0            | 2              | 0            | 0            | 0           | 0            | 2              |                                                      |          |          |          |          |          |          |          |                   |
| B*08:01:13                                              | 08:01:13               | HLA05482  |                                               | 0            | 0            | 8              | 0            | 0            | 0           | 0            | 8              |                                                      |          | WD       |          |          |          |          | WD       | WD                |

| Supplemental Table 9: HLA-B Allele Summary <sup>a</sup> |                    |           | Allele Count by Population Group <sup>b</sup> |           |          |           |          |          |          |           |            | 3.0.0 CIWD Category by Population Group <sup>c</sup> |     |           |      |          |     |           |           |                   |
|---------------------------------------------------------|--------------------|-----------|-----------------------------------------------|-----------|----------|-----------|----------|----------|----------|-----------|------------|------------------------------------------------------|-----|-----------|------|----------|-----|-----------|-----------|-------------------|
| Allele                                                  | Genomic typing     | Allele ID | G group                                       | AFA       | API      | EURO      | MENA     | HIS      | NAM      | UNK       | Total      | AFA                                                  | API | EURO      | MENA | HIS      | NAM | UNK       | Total     | Highest Frequency |
| B*08:01:15                                              | 08:01:15           | HLA06215  |                                               | 0         | 0        | 2         | 0        | 0        | 0        | 0         | 2          |                                                      |     |           |      |          |     |           |           |                   |
| B*08:01:16                                              | 08:01:16           | HLA06917  |                                               | 0         | 0        | 0         | 1        | 0        | 0        | 0         | 1          |                                                      |     |           |      |          |     |           |           |                   |
| B*08:01:17                                              | 08:01:17           | HLA07637  |                                               | 0         | 0        | 7         | 0        | 0        | 0        | 1         | 8          |                                                      |     | WD        |      |          |     |           | WD        | WD                |
| B*08:01:18                                              | 08:01:18           | HLA08341  |                                               | 0         | 0        | 3         | 0        | 0        | 0        | 0         | 3          |                                                      |     |           |      |          |     |           |           |                   |
| B*08:01:19                                              | 08:01:19           | HLA08665  |                                               | 0         | 0        | 0         | 0        | 0        | 0        | 1         | 1          |                                                      |     |           |      |          |     |           |           |                   |
| B*08:01:21                                              | 08:01:21           | HLA09558  |                                               | 0         | 0        | 3         | 0        | 0        | 0        | 0         | 3          |                                                      |     |           |      |          |     |           |           |                   |
| B*08:01:22                                              | 08:01:22           | HLA09893  |                                               | 0         | 0        | 3         | 0        | 0        | 0        | 0         | 3          |                                                      |     |           |      |          |     |           |           |                   |
| B*08:01:23                                              | 08:01:23           | HLA10404  |                                               | 0         | 2        | 0         | 0        | 0        | 0        | 0         | 2          |                                                      |     |           |      |          |     |           |           |                   |
| B*08:01:24                                              | 08:01:24           | HLA11009  |                                               | 0         | 0        | 0         | 0        | 0        | 0        | 1         | 1          |                                                      |     |           |      |          |     |           |           |                   |
| B*08:01:25                                              | 08:01:25           | HLA11232  |                                               | 0         | 0        | 2         | 0        | 0        | 0        | 0         | 2          |                                                      |     |           |      |          |     |           |           |                   |
| B*08:01:29                                              | 08:01:29           | HLA11724  |                                               | 0         | 0        | 3         | 0        | 0        | 0        | 0         | 3          |                                                      |     |           |      |          |     |           |           |                   |
| B*08:01:30                                              | 08:01:30           | HLA11822  |                                               | 0         | 0        | 2         | 0        | 0        | 0        | 0         | 2          |                                                      |     |           |      |          |     |           |           |                   |
| B*08:01:32                                              | 08:01:32           | HLA14395  |                                               | 0         | 0        | 1         | 0        | 0        | 0        | 0         | 1          |                                                      |     |           |      |          |     |           |           |                   |
| B*08:02                                                 | 08:02              | HLA00147  |                                               | 0         | 0        | 14        | 0        | 0        | 0        | 1         | 15         |                                                      |     | WD        |      |          |     |           | WD        | WD                |
| B*08:03                                                 | 08:03              | HLA00148  |                                               | 0         | 1        | 4         | 4        | 1        | 0        | 2         | 12         |                                                      |     |           |      |          |     |           | WD        | WD                |
| <b>B*08:04 total</b>                                    | <b>08:04 total</b> |           |                                               | <b>0</b>  | <b>0</b> | <b>39</b> | <b>1</b> | <b>0</b> | <b>0</b> | <b>35</b> | <b>75</b>  |                                                      |     | <b>WD</b> |      |          |     | <b>I</b>  | <b>WD</b> | <b>I</b>          |
| B*08:04                                                 | 08:04              |           |                                               | 0         | 0        | 38        | 1        | 0        | 0        | 27        | 66         |                                                      |     | WD        |      |          |     | <b>I</b>  | WD        | <b>I</b>          |
| B*08:04:01                                              | 08:04:01           | HLA00149  |                                               | 0         | 0        | 1         | 0        | 0        | 0        | 8         | 9          |                                                      |     |           |      |          |     | WD        | WD        | WD                |
| B*08:07                                                 | 08:07              | HLA00974  |                                               | 1         | 0        | 19        | 0        | 0        | 0        | 1         | 21         |                                                      |     | WD        |      |          |     |           | WD        | WD                |
| B*08:09                                                 | 08:09              | HLA00976  |                                               | 9         | 3        | 725       | 1        | 10       | 0        | 74        | 822        | WD                                                   |     | <b>I</b>  |      | <b>I</b> |     | <b>I</b>  | <b>I</b>  | <b>I</b>          |
| B*08:11                                                 | 08:11              | HLA01193  |                                               | 0         | 0        | 7         | 0        | 2        | 0        | 0         | 9          |                                                      |     | WD        |      |          |     |           | WD        | WD                |
| <b>B*08:12 total</b>                                    | <b>08:12 total</b> |           |                                               | <b>93</b> | <b>0</b> | <b>20</b> | <b>1</b> | <b>0</b> | <b>0</b> | <b>12</b> | <b>126</b> | <b>C</b>                                             |     | <b>WD</b> |      |          |     | <b>WD</b> | <b>WD</b> | <b>C</b>          |
| B*08:12                                                 | 08:12              |           |                                               | 7         | 0        | 0         | 0        | 0        | 0        | 0         | 7          | WD                                                   |     |           |      |          |     |           | WD        | WD                |
| B*08:12:01                                              | 08:12:01           | HLA01230  |                                               | 86        | 0        | 17        | 1        | 0        | 0        | 12        | 116        | C                                                    |     | WD        |      |          |     | WD        | WD        | C                 |
| B*08:12:03                                              | 08:12:03           | HLA04186  |                                               | 0         | 0        | 3         | 0        | 0        | 0        | 0         | 3          |                                                      |     |           |      |          |     |           |           |                   |
| B*08:13                                                 | 08:13              | HLA01352  |                                               | 1         | 0        | 32        | 0        | 1        | 0        | 6         | 40         |                                                      |     | WD        |      |          |     | WD        | WD        | WD                |
| B*08:14                                                 | 08:14              | HLA01418  |                                               | 0         | 0        | 13        | 0        | 0        | 0        | 0         | 13         |                                                      |     | WD        |      |          |     |           | WD        | WD                |
| B*08:15                                                 | 08:15              | HLA01535  |                                               | 0         | 0        | 14        | 0        | 0        | 0        | 1         | 15         |                                                      |     | WD        |      |          |     |           | WD        | WD                |
| B*08:16                                                 | 08:16              | HLA01641  |                                               | 6         | 0        | 0         | 0        | 0        | 0        | 1         | 7          | WD                                                   |     |           |      |          |     |           | WD        | WD                |
| B*08:17                                                 | 08:17              | HLA01654  |                                               | 0         | 0        | 1         | 0        | 0        | 0        | 0         | 1          |                                                      |     |           |      |          |     |           |           |                   |
| B*08:18                                                 | 08:18              | HLA01701  |                                               | 9         | 1        | 419       | 0        | 13       | 2        | 20        | 464        | WD                                                   |     | <b>I</b>  |      | <b>I</b> |     | <b>I</b>  | <b>I</b>  | <b>I</b>          |

| Supplemental Table 9: HLA-B Allele Summary <sup>a</sup> |                    |           | Allele Count by Population Group <sup>b</sup> |          |          |          |          |          |          |           |           | 3.0.0 CIWD Category by Population Group <sup>c</sup> |     |      |      |     |     |     |           |                   |
|---------------------------------------------------------|--------------------|-----------|-----------------------------------------------|----------|----------|----------|----------|----------|----------|-----------|-----------|------------------------------------------------------|-----|------|------|-----|-----|-----|-----------|-------------------|
| Allele                                                  | Genomic typing     | Allele ID | G group                                       | AFA      | API      | EURO     | MENA     | HIS      | NAM      | UNK       | Total     | AFA                                                  | API | EURO | MENA | HIS | NAM | UNK | Total     | Highest Frequency |
| B*08:20                                                 | 08:20              | HLA01752  |                                               | 2        | 0        | 35       | 0        | 1        | 0        | 4         | 42        |                                                      |     | WD   |      |     |     |     | WD        | WD                |
| B*08:21                                                 | 08:21              | HLA01772  |                                               | 0        | 0        | 4        | 0        | 0        | 0        | 0         | 4         |                                                      |     |      |      |     |     |     |           |                   |
| B*08:22                                                 | 08:22              | HLA01917  |                                               | 0        | 0        | 5        | 0        | 1        | 0        | 1         | 7         |                                                      |     | WD   |      |     |     |     | WD        | WD                |
| B*08:23                                                 | 08:23              | HLA02132  |                                               | 11       | 0        | 38       | 0        | 0        | 0        | 4         | 53        | WD                                                   |     | WD   |      |     |     |     | WD        | WD                |
| B*08:24                                                 | 08:24              | HLA02142  |                                               | 0        | 0        | 132      | 0        | 0        | 0        | 0         | 132       |                                                      |     | I    |      |     |     |     | WD        | I                 |
| B*08:25                                                 | 08:25              | HLA02252  |                                               | 0        | 0        | 42       | 0        | 0        | 0        | 0         | 42        |                                                      |     | WD   |      |     |     |     | WD        | WD                |
| <b>B*08:26 total</b>                                    | <b>08:26 total</b> |           |                                               | <b>0</b> | <b>0</b> | <b>3</b> | <b>0</b> | <b>0</b> | <b>0</b> | <b>11</b> | <b>14</b> |                                                      |     |      |      |     |     |     | <b>WD</b> | <b>WD</b>         |
| B*08:26                                                 | 08:26              |           |                                               | 0        | 0        | 1        | 0        | 0        | 0        | 0         | 1         |                                                      |     |      |      |     |     |     |           |                   |
| B*08:26:01                                              | 08:26:01           | HLA02308  |                                               | 0        | 0        | 2        | 0        | 0        | 0        | 11        | 13        |                                                      |     |      |      |     |     |     | WD        | WD                |
| B*08:27                                                 | 08:27              | HLA02406  |                                               | 0        | 0        | 1        | 0        | 0        | 0        | 0         | 1         |                                                      |     |      |      |     |     |     |           |                   |
| B*08:28                                                 | 08:28              | HLA02490  |                                               | 0        | 0        | 20       | 0        | 0        | 0        | 3         | 23        |                                                      |     | WD   |      |     |     |     | WD        | WD                |
| B*08:30N                                                | 08:30N             | HLA02591  |                                               | 0        | 0        | 1        | 0        | 0        | 0        | 1         | 2         |                                                      |     |      |      |     |     |     |           |                   |
| B*08:31                                                 | 08:31              | HLA02762  |                                               | 0        | 0        | 6        | 0        | 0        | 0        | 0         | 6         |                                                      |     | WD   |      |     |     |     | WD        | WD                |
| B*08:33                                                 | 08:33              | HLA02849  |                                               | 0        | 0        | 41       | 0        | 15       | 0        | 23        | 79        |                                                      |     | WD   |      | I   |     | I   | WD        | I                 |
| B*08:34                                                 | 08:34              | HLA03091  |                                               | 0        | 0        | 9        | 0        | 0        | 0        | 1         | 10        |                                                      |     | WD   |      |     |     |     | WD        | WD                |
| B*08:35                                                 | 08:35              | HLA03164  |                                               | 0        | 0        | 35       | 0        | 1        | 0        | 3         | 39        |                                                      |     | WD   |      |     |     |     | WD        | WD                |
| B*08:36                                                 | 08:36              | HLA03265  |                                               | 2        | 0        | 0        | 0        | 4        | 0        | 0         | 6         |                                                      |     |      |      |     |     |     | WD        | WD                |
| B*08:37                                                 | 08:37              | HLA03450  |                                               | 0        | 0        | 40       | 0        | 1        | 0        | 0         | 41        |                                                      |     | WD   |      |     |     |     | WD        | WD                |
| B*08:39                                                 | 08:39              | HLA03663  |                                               | 1        | 0        | 15       | 0        | 0        | 0        | 1         | 17        |                                                      |     | WD   |      |     |     |     | WD        | WD                |
| B*08:41                                                 | 08:41              | HLA03902  |                                               | 0        | 0        | 19       | 0        | 0        | 0        | 0         | 19        |                                                      |     | WD   |      |     |     |     | WD        | WD                |
| B*08:43                                                 | 08:43              | HLA04081  |                                               | 1        | 2        | 0        | 1        | 0        | 0        | 0         | 4         |                                                      |     |      |      |     |     |     |           |                   |
| B*08:47                                                 | 08:47              | HLA04240  |                                               | 0        | 0        | 2        | 0        | 0        | 0        | 1         | 3         |                                                      |     |      |      |     |     |     |           |                   |
| B*08:48                                                 | 08:48              | HLA04438  |                                               | 0        | 0        | 2        | 0        | 0        | 0        | 0         | 2         |                                                      |     |      |      |     |     |     |           |                   |
| B*08:50                                                 | 08:50              | HLA04499  |                                               | 0        | 0        | 4        | 0        | 1        | 0        | 0         | 5         |                                                      |     |      |      |     |     |     | WD        | WD                |
| B*08:51                                                 | 08:51              | HLA04507  |                                               | 0        | 1        | 2        | 0        | 0        | 0        | 0         | 3         |                                                      |     |      |      |     |     |     |           |                   |
| B*08:52                                                 | 08:52              | HLA04515  |                                               | 0        | 0        | 6        | 0        | 0        | 0        | 0         | 6         |                                                      |     | WD   |      |     |     |     | WD        | WD                |
| <b>B*08:53 total</b>                                    | <b>08:53 total</b> |           |                                               | <b>0</b> | <b>0</b> | <b>1</b> | <b>0</b> | <b>0</b> | <b>0</b> | <b>0</b>  | <b>1</b>  |                                                      |     |      |      |     |     |     |           |                   |
| B*08:53                                                 | 08:53              |           |                                               | 0        | 0        | 1        | 0        | 0        | 0        | 0         | 1         |                                                      |     |      |      |     |     |     |           |                   |
| <b>B*08:56 total</b>                                    | <b>08:56 total</b> |           |                                               | <b>0</b> | <b>0</b> | <b>3</b> | <b>0</b> | <b>0</b> | <b>0</b> | <b>2</b>  | <b>5</b>  |                                                      |     |      |      |     |     |     | <b>WD</b> | <b>WD</b>         |
| B*08:56                                                 | 08:56              |           |                                               | 0        | 0        | 1        | 0        | 0        | 0        | 0         | 1         |                                                      |     |      |      |     |     |     |           |                   |
| B*08:56:01                                              | 08:56:01           | HLA04720  |                                               | 0        | 0        | 0        | 0        | 0        | 0        | 2         | 2         |                                                      |     |      |      |     |     |     |           |                   |

| Supplemental Table 9: HLA-B Allele Summary <sup>a</sup> |                    |           | Allele Count by Population Group <sup>b</sup> |          |           |          |          |          |          |          |           | 3.0.0 CIWD Category by Population Group <sup>c</sup> |     |      |      |     |     |     |       |                   |
|---------------------------------------------------------|--------------------|-----------|-----------------------------------------------|----------|-----------|----------|----------|----------|----------|----------|-----------|------------------------------------------------------|-----|------|------|-----|-----|-----|-------|-------------------|
| Allele                                                  | Genomic typing     | Allele ID | G group                                       | AFA      | API       | EURO     | MENA     | HIS      | NAM      | UNK      | Total     | AFA                                                  | API | EURO | MENA | HIS | NAM | UNK | Total | Highest Frequency |
| B*08:56:02                                              | 08:56:02           | HLA08338  |                                               | 0        | 0         | 2        | 0        | 0        | 0        | 0        | 2         |                                                      |     |      |      |     |     |     |       |                   |
| B*08:58                                                 | 08:58              | HLA04753  |                                               | 0        | 0         | 2        | 0        | 0        | 0        | 0        | 2         |                                                      |     |      |      |     |     |     |       |                   |
| <b>B*08:59 total</b>                                    | <b>08:59 total</b> |           |                                               | <b>0</b> | <b>19</b> | <b>3</b> | <b>0</b> | <b>0</b> | <b>0</b> | <b>0</b> | <b>22</b> |                                                      | I   |      |      |     |     |     | WD    | I                 |
| B*08:59                                                 | 08:59              |           |                                               | 0        | 1         | 0        | 0        | 0        | 0        | 0        | 1         |                                                      |     |      |      |     |     |     |       |                   |
| B*08:59:01                                              | 08:59:01           | HLA04788  |                                               | 0        | 18        | 1        | 0        | 0        | 0        | 0        | 19        |                                                      | I   |      |      |     |     |     | WD    | I                 |
| B*08:59:02                                              | 08:59:02           | HLA08983  |                                               | 0        | 0         | 2        | 0        | 0        | 0        | 0        | 2         |                                                      |     |      |      |     |     |     |       |                   |
| B*08:61                                                 | 08:61              | HLA04860  |                                               | 0        | 0         | 2        | 0        | 0        | 0        | 0        | 2         |                                                      |     |      |      |     |     |     |       |                   |
| B*08:62                                                 | 08:62              | HLA05290  |                                               | 0        | 0         | 2        | 1        | 0        | 0        | 0        | 3         |                                                      |     |      |      |     |     |     |       |                   |
| B*08:63                                                 | 08:63              | HLA05506  |                                               | 0        | 0         | 11       | 0        | 0        | 0        | 0        | 11        |                                                      |     | WD   |      |     |     |     | WD    | WD                |
| B*08:64                                                 | 08:64              | HLA05510  |                                               | 0        | 0         | 1        | 0        | 0        | 0        | 0        | 1         |                                                      |     |      |      |     |     |     |       |                   |
| B*08:65                                                 | 08:65              | HLA05720  |                                               | 0        | 0         | 0        | 0        | 0        | 0        | 1        | 1         |                                                      |     |      |      |     |     |     |       |                   |
| B*08:68                                                 | 08:68              | HLA06259  |                                               | 0        | 0         | 0        | 0        | 1        | 0        | 0        | 1         |                                                      |     |      |      |     |     |     |       |                   |
| B*08:69                                                 | 08:69              | HLA06260  |                                               | 0        | 0         | 2        | 0        | 0        | 0        | 1        | 3         |                                                      |     |      |      |     |     |     |       |                   |
| B*08:71                                                 | 08:71              | HLA06682  |                                               | 0        | 1         | 25       | 0        | 0        | 0        | 0        | 26        |                                                      |     | WD   |      |     |     |     | WD    | WD                |
| B*08:72N                                                | 08:72N             | HLA06918  |                                               | 0        | 0         | 1        | 0        | 0        | 0        | 0        | 1         |                                                      |     |      |      |     |     |     |       |                   |
| B*08:75                                                 | 08:75              | HLA06956  |                                               | 0        | 0         | 5        | 0        | 0        | 0        | 0        | 5         |                                                      |     | WD   |      |     |     |     | WD    | WD                |
| B*08:77                                                 | 08:77              | HLA06996  |                                               | 0        | 3         | 1        | 0        | 0        | 0        | 0        | 4         |                                                      |     |      |      |     |     |     |       |                   |
| B*08:78                                                 | 08:78              | HLA07191  |                                               | 0        | 0         | 5        | 0        | 1        | 0        | 5        | 11        |                                                      |     | WD   |      |     |     | WD  | WD    | WD                |
| B*08:81                                                 | 08:81              | HLA07442  |                                               | 0        | 0         | 1        | 0        | 0        | 0        | 0        | 1         |                                                      |     |      |      |     |     |     |       |                   |
| B*08:86N                                                | 08:86N             | HLA07635  |                                               | 0        | 0         | 1        | 0        | 0        | 0        | 0        | 1         |                                                      |     |      |      |     |     |     |       |                   |
| B*08:87                                                 | 08:87              | HLA07636  |                                               | 0        | 0         | 2        | 0        | 0        | 0        | 0        | 2         |                                                      |     |      |      |     |     |     |       |                   |
| B*08:88                                                 | 08:88              | HLA07638  |                                               | 0        | 0         | 5        | 0        | 0        | 0        | 0        | 5         |                                                      |     | WD   |      |     |     |     | WD    | WD                |
| B*08:89                                                 | 08:89              | HLA08041  |                                               | 0        | 0         | 2        | 0        | 0        | 0        | 0        | 2         |                                                      |     |      |      |     |     |     |       |                   |
| B*08:91                                                 | 08:91              | HLA07912  |                                               | 0        | 0         | 1        | 0        | 1        | 0        | 0        | 2         |                                                      |     |      |      |     |     |     |       |                   |
| B*08:92                                                 | 08:92              | HLA07913  |                                               | 0        | 0         | 3        | 0        | 0        | 0        | 0        | 3         |                                                      |     |      |      |     |     |     |       |                   |
| B*08:96                                                 | 08:96              | HLA08340  |                                               | 0        | 0         | 0        | 0        | 0        | 0        | 2        | 2         |                                                      |     |      |      |     |     |     |       |                   |
| B*08:97                                                 | 08:97              | HLA08343  |                                               | 0        | 0         | 13       | 0        | 0        | 0        | 0        | 13        |                                                      |     | WD   |      |     |     |     | WD    | WD                |
| B*08:98                                                 | 08:98              | HLA08508  |                                               | 0        | 0         | 3        | 0        | 0        | 0        | 0        | 3         |                                                      |     |      |      |     |     |     |       |                   |
| B*08:102                                                | 08:102             | HLA08666  |                                               | 0        | 0         | 0        | 0        | 0        | 0        | 1        | 1         |                                                      |     |      |      |     |     |     |       |                   |
| B*08:103                                                | 08:103             | HLA08668  |                                               | 0        | 0         | 1        | 0        | 0        | 0        | 0        | 1         |                                                      |     |      |      |     |     |     |       |                   |
| B*08:104                                                | 08:104             | HLA08669  |                                               | 0        | 0         | 8        | 0        | 0        | 0        | 0        | 8         |                                                      |     | WD   |      |     |     |     | WD    | WD                |

| Supplemental Table 9: HLA-B Allele Summary <sup>a</sup> |                        |           | Allele Count by Population Group <sup>b</sup> |             |              |               |              |             |            |              |               | 3.0.0 CIWD Category by Population Group <sup>c</sup> |          |          |          |          |          |          |          |                   |
|---------------------------------------------------------|------------------------|-----------|-----------------------------------------------|-------------|--------------|---------------|--------------|-------------|------------|--------------|---------------|------------------------------------------------------|----------|----------|----------|----------|----------|----------|----------|-------------------|
| Allele                                                  | Genomic typing         | Allele ID | G group                                       | AFA         | API          | EURO          | MENA         | HIS         | NAM        | UNK          | Total         | AFA                                                  | API      | EURO     | MENA     | HIS      | NAM      | UNK      | Total    | Highest Frequency |
| B*08:108                                                | 08:108                 | HLA09450  |                                               | 0           | 0            | 2             | 0            | 0           | 0          | 0            | 2             |                                                      |          |          |          |          |          |          |          |                   |
| B*08:110                                                | 08:110                 | HLA09557  |                                               | 0           | 0            | 8             | 0            | 0           | 0          | 0            | 8             |                                                      |          | WD       |          |          |          |          | WD       | WD                |
| B*08:111                                                | 08:111                 | HLA09874  |                                               | 0           | 0            | 2             | 0            | 0           | 0          | 0            | 2             |                                                      |          |          |          |          |          |          |          |                   |
| B*08:112                                                | 08:112                 | HLA09892  |                                               | 0           | 0            | 1             | 0            | 0           | 0          | 0            | 1             |                                                      |          |          |          |          |          |          |          |                   |
| B*08:113                                                | 08:113                 | HLA10192  |                                               | 0           | 0            | 2             | 0            | 0           | 0          | 0            | 2             |                                                      |          |          |          |          |          |          |          |                   |
| B*08:117                                                | 08:117                 | HLA11010  |                                               | 0           | 0            | 1             | 0            | 0           | 0          | 0            | 1             |                                                      |          |          |          |          |          |          |          |                   |
| B*08:118                                                | 08:118                 | HLA11011  |                                               | 0           | 0            | 0             | 0            | 0           | 0          | 1            | 1             |                                                      |          |          |          |          |          |          |          |                   |
| B*08:119                                                | 08:119                 | HLA11012  |                                               | 0           | 0            | 0             | 2            | 0           | 0          | 0            | 2             |                                                      |          |          |          |          |          |          |          |                   |
| B*08:122                                                | 08:122                 | HLA11476  |                                               | 0           | 0            | 1             | 0            | 0           | 0          | 0            | 1             |                                                      |          |          |          |          |          |          |          |                   |
| B*08:124                                                | 08:124                 | HLA11652  |                                               | 0           | 0            | 1             | 0            | 0           | 0          | 0            | 1             |                                                      |          |          |          |          |          |          |          |                   |
| B*08:129                                                | 08:129                 | HLA11823  |                                               | 0           | 0            | 3             | 0            | 0           | 0          | 0            | 3             |                                                      |          |          |          |          |          |          |          |                   |
| B*08:132                                                | 08:132                 | HLA11937  |                                               | 0           | 1            | 3             | 0            | 0           | 0          | 0            | 4             |                                                      |          |          |          |          |          |          |          |                   |
| B*08:135                                                | 08:135                 | HLA12268  |                                               | 0           | 0            | 2             | 0            | 0           | 0          | 0            | 2             |                                                      |          |          |          |          |          |          |          |                   |
| B*08:136                                                | 08:136                 | HLA12269  |                                               | 0           | 0            | 2             | 0            | 0           | 0          | 0            | 2             |                                                      |          |          |          |          |          |          |          |                   |
| B*08:137                                                | 08:137                 | HLA12475  |                                               | 0           | 0            | 3             | 0            | 0           | 0          | 0            | 3             |                                                      |          |          |          |          |          |          |          |                   |
| B*08:138                                                | 08:138                 | HLA12607  |                                               | 0           | 1            | 1             | 0            | 0           | 0          | 0            | 2             |                                                      |          |          |          |          |          |          |          |                   |
| B*08:145                                                | 08:145                 | HLA13343  |                                               | 0           | 0            | 0             | 0            | 1           | 0          | 0            | 1             |                                                      |          |          |          |          |          |          |          |                   |
| B*08:149                                                | 08:149                 | HLA13469  |                                               | 0           | 0            | 1             | 0            | 0           | 0          | 0            | 1             |                                                      |          |          |          |          |          |          |          |                   |
| B*08:150                                                | 08:150                 | HLA13470  |                                               | 0           | 0            | 2             | 0            | 0           | 0          | 0            | 2             |                                                      |          |          |          |          |          |          |          |                   |
| B*08:162                                                | 08:162                 | HLA14926  |                                               | 0           | 0            | 2             | 0            | 0           | 0          | 0            | 2             |                                                      |          |          |          |          |          |          |          |                   |
| B*08:165                                                | 08:165                 | HLA15164  |                                               | 0           | 0            | 1             | 0            | 0           | 0          | 1            | 2             |                                                      |          |          |          |          |          |          |          |                   |
| B*08:CODE                                               | 08:CODE                |           |                                               | 448         | 346          | 56805         | 356          | 2237        | 186        | 4406         | 64784         | NA                                                   | NA       | NA       | NA       | NA       | NA       | NA       | NA       | NA                |
| <b>B*13:01 total</b>                                    | <b>13:01 total</b>     |           |                                               | <b>58</b>   | <b>30245</b> | <b>2316</b>   | <b>477</b>   | <b>95</b>   | <b>38</b>  | <b>1987</b>  | <b>35216</b>  | <b>C</b>                                             | <b>C</b> | <b>C</b> | <b>C</b> | <b>C</b> | <b>C</b> | <b>C</b> | <b>C</b> | <b>C</b>          |
| B*13:01                                                 | 13:01                  |           |                                               | 6           | 1242         | 118           | 25           | 11          | 4          | 264          | 1670          | WD                                                   | C        | WD       | WD       | I        |          | C        | C        | C                 |
| B*13:01P                                                | 13:01P                 |           |                                               | 0           | 0            | 5             | 0            | 0           | 0          | 0            | 5             |                                                      |          | WD       |          |          |          |          | WD       | WD                |
| <b>B*13:01:01G total</b>                                | <b>13:01:01G total</b> |           |                                               | <b>52</b>   | <b>28993</b> | <b>2191</b>   | <b>452</b>   | <b>84</b>   | <b>34</b>  | <b>1722</b>  | <b>33528</b>  | <b>C</b>                                             | <b>C</b> | <b>C</b> | <b>C</b> | <b>C</b> | <b>C</b> | <b>C</b> | <b>C</b> | <b>C</b>          |
| B*13:01:01G                                             | 13:01:01G              |           | 13:01:01G                                     | 47          | 25904        | 2096          | 433          | 65          | 24         | 1382         | 29951         | C                                                    | C        | C        | C        | I        | C        | C        | C        | C                 |
| B*13:01:01                                              | 13:01:01               |           | 13:01:01G                                     | 5           | 3089         | 95            | 19           | 19          | 10         | 340          | 3577          | WD                                                   | C        | WD       | WD       | I        | C        | C        | C        | C                 |
| B*13:01:02                                              | 13:01:02               | HLA03770  |                                               | 0           | 2            | 2             | 0            | 0           | 0          | 0            | 4             |                                                      |          |          |          |          |          |          |          |                   |
| B*13:01:10                                              | 13:01:10               | HLA13026  |                                               | 0           | 8            | 0             | 0            | 0           | 0          | 1            | 9             |                                                      | WD       |          |          |          |          |          | WD       | WD                |
| <b>B*13:02 total</b>                                    | <b>13:02 total</b>     |           |                                               | <b>3803</b> | <b>20350</b> | <b>390325</b> | <b>12629</b> | <b>8855</b> | <b>722</b> | <b>30541</b> | <b>467225</b> | <b>C</b>                                             | <b>C</b> | <b>C</b> | <b>C</b> | <b>C</b> | <b>C</b> | <b>C</b> | <b>C</b> | <b>C</b>          |

| Supplemental Table 9: HLA-B Allele Summary <sup>a</sup> |                        |           | Allele Count by Population Group <sup>b</sup> |             |              |               |              |             |            |              |               | 3.0.0 CIWD Category by Population Group <sup>c</sup> |          |          |          |          |          |           |           |                   |
|---------------------------------------------------------|------------------------|-----------|-----------------------------------------------|-------------|--------------|---------------|--------------|-------------|------------|--------------|---------------|------------------------------------------------------|----------|----------|----------|----------|----------|-----------|-----------|-------------------|
| Allele                                                  | Genomic typing         | Allele ID | G group                                       | AFA         | API          | EURO          | MENA         | HIS         | NAM        | UNK          | Total         | AFA                                                  | API      | EURO     | MENA     | HIS      | NAM      | UNK       | Total     | Highest Frequency |
| B*13:02                                                 | 13:02                  |           |                                               | 29          | 58           | 9335          | 205          | 10          | 1          | 530          | 10168         | WD                                                   | I        | C        | C        | I        |          | C         | C         | C                 |
| B*13:02P                                                | 13:02P                 |           |                                               | 3           | 0            | 482           | 0            | 2           | 0          | 3            | 490           |                                                      |          | I        |          |          |          |           | I         | I                 |
| <b>B*13:02:01G total</b>                                | <b>13:02:01G total</b> |           |                                               | <b>3771</b> | <b>20289</b> | <b>380442</b> | <b>12424</b> | <b>8842</b> | <b>720</b> | <b>30004</b> | <b>456492</b> | <b>C</b>                                             | <b>C</b> | <b>C</b> | <b>C</b> | <b>C</b> | <b>C</b> | <b>C</b>  | <b>C</b>  | <b>C</b>          |
| B*13:02:01G                                             | 13:02:01G              |           | 13:02:01G                                     | 3076        | 17824        | 366446        | 12055        | 6274        | 533        | 27712        | 433920        | C                                                    | C        | C        | C        | C        | C        | C         | C         | C                 |
| B*13:02:01                                              | 13:02:01               |           | 13:02:01G                                     | 665         | 2401         | 13238         | 334          | 2461        | 178        | 2205         | 21482         | C                                                    | C        | C        | C        | C        | C        | C         | C         | C                 |
| B*13:02:01:01                                           | 13:02:01:01            | HLA00153  | 13:02:01G                                     | 30          | 63           | 757           | 35           | 107         | 9          | 86           | 1087          | WD                                                   | I        | I        | WD       | C        | C        | I         | I         | C                 |
| B*13:02:01:03                                           | 13:02:01:03            | HLA16858  | 13:02:01G                                     | 0           | 0            | 0             | 0            | 0           | 0          | 1            | 1             |                                                      |          |          |          |          |          |           |           |                   |
| B*13:38                                                 | 13:38                  | HLA05118  | 13:02:01G                                     | 0           | 1            | 1             | 0            | 0           | 0          | 0            | 2             |                                                      |          |          |          |          |          |           |           |                   |
| B*13:02:02                                              | 13:02:02               | HLA02174  |                                               | 0           | 0            | 24            | 0            | 1           | 1          | 1            | 27            |                                                      |          | WD       |          |          |          |           | WD        | WD                |
| B*13:02:03                                              | 13:02:03               | HLA02295  |                                               | 0           | 0            | 3             | 0            | 0           | 0          | 1            | 4             |                                                      |          |          |          |          |          |           |           |                   |
| B*13:02:04                                              | 13:02:04               | HLA02809  |                                               | 0           | 0            | 19            | 0            | 0           | 0          | 2            | 21            |                                                      |          | WD       |          |          |          |           | WD        | WD                |
| B*13:02:06                                              | 13:02:06               | HLA04083  |                                               | 0           | 1            | 2             | 0            | 0           | 0          | 0            | 3             |                                                      |          |          |          |          |          |           |           |                   |
| B*13:02:07                                              | 13:02:07               | HLA04849  |                                               | 0           | 0            | 2             | 0            | 0           | 0          | 0            | 2             |                                                      |          |          |          |          |          |           |           |                   |
| B*13:02:08                                              | 13:02:08               | HLA05256  |                                               | 0           | 0            | 1             | 0            | 0           | 0          | 0            | 1             |                                                      |          |          |          |          |          |           |           |                   |
| B*13:02:10                                              | 13:02:10               | HLA06235  |                                               | 0           | 0            | 1             | 0            | 0           | 0          | 0            | 1             |                                                      |          |          |          |          |          |           |           |                   |
| B*13:02:11                                              | 13:02:11               | HLA06699  |                                               | 0           | 0            | 7             | 0            | 0           | 0          | 0            | 7             |                                                      |          | WD       |          |          |          |           | WD        | WD                |
| B*13:02:13                                              | 13:02:13               | HLA07917  |                                               | 0           | 2            | 0             | 0            | 0           | 0          | 0            | 2             |                                                      |          |          |          |          |          |           |           |                   |
| B*13:02:14                                              | 13:02:14               | HLA08346  |                                               | 0           | 0            | 2             | 0            | 0           | 0          | 0            | 2             |                                                      |          |          |          |          |          |           |           |                   |
| B*13:02:15                                              | 13:02:15               | HLA08347  |                                               | 0           | 0            | 3             | 0            | 0           | 0          | 0            | 3             |                                                      |          |          |          |          |          |           |           |                   |
| B*13:02:17                                              | 13:02:17               | HLA12700  |                                               | 0           | 0            | 1             | 0            | 0           | 0          | 0            | 1             |                                                      |          |          |          |          |          |           |           |                   |
| B*13:02:19                                              | 13:02:19               | HLA16247  |                                               | 0           | 0            | 1             | 0            | 0           | 0          | 0            | 1             |                                                      |          |          |          |          |          |           |           |                   |
| B*13:03                                                 | 13:03                  | HLA00154  |                                               | 23          | 4            | 5             | 8            | 0           | 0          | 0            | 40            | WD                                                   |          | WD       | WD       |          |          |           | WD        | WD                |
| B*13:04                                                 | 13:04                  | HLA00155  |                                               | 0           | 0            | 4             | 0            | 0           | 0          | 1            | 5             |                                                      |          |          |          |          |          |           | WD        | WD                |
| B*13:06                                                 | 13:06                  | HLA01276  |                                               | 0           | 4            | 0             | 0            | 0           | 0          | 1            | 5             |                                                      |          |          |          |          |          |           | WD        | WD                |
| B*13:08                                                 | 13:08                  | HLA01476  |                                               | 0           | 0            | 44            | 0            | 0           | 0          | 1            | 45            |                                                      |          | WD       |          |          |          |           | WD        | WD                |
| B*13:10                                                 | 13:10                  | HLA01591  |                                               | 0           | 0            | 61            | 0            | 0           | 0          | 0            | 61            |                                                      |          | WD       |          |          |          |           | WD        | WD                |
| B*13:11                                                 | 13:11                  | HLA01632  |                                               | 0           | 0            | 8             | 2            | 1           | 0          | 1            | 12            |                                                      |          | WD       |          |          |          |           | WD        | WD                |
| <b>B*13:12 total</b>                                    | <b>13:12 total</b>     |           |                                               | <b>0</b>    | <b>15</b>    | <b>0</b>      | <b>0</b>     | <b>0</b>    | <b>0</b>   | <b>8</b>     | <b>23</b>     |                                                      | I        |          |          |          |          | <b>WD</b> | <b>WD</b> | <b>I</b>          |
| B*13:12                                                 | 13:12                  |           |                                               | 0           | 5            | 0             | 0            | 0           | 0          | 2            | 7             | WD                                                   |          |          |          |          |          |           | WD        | WD                |
| B*13:12:01                                              | 13:12:01               | HLA01840  |                                               | 0           | 10           | 0             | 0            | 0           | 0          | 5            | 15            | WD                                                   |          |          |          |          |          |           | WD        | WD                |
| B*13:12:02                                              | 13:12:02               | HLA08902  |                                               | 0           | 0            | 0             | 0            | 0           | 0          | 1            | 1             |                                                      |          |          |          |          |          |           |           |                   |

| Supplemental Table 9: HLA-B Allele Summary <sup>a</sup> |                     |           | Allele Count by Population Group <sup>b</sup> |     |     |      |      |     |     |     |       | 3.0.0 CIWD Category by Population Group <sup>c</sup> |     |      |      |     |     |     |       |                   |
|---------------------------------------------------------|---------------------|-----------|-----------------------------------------------|-----|-----|------|------|-----|-----|-----|-------|------------------------------------------------------|-----|------|------|-----|-----|-----|-------|-------------------|
| Allele                                                  | Genomic typing      | Allele ID | G group                                       | AFA | API | EURO | MENA | HIS | NAM | UNK | Total | AFA                                                  | API | EURO | MENA | HIS | NAM | UNK | Total | Highest Frequency |
| <b>B*13:13 total</b>                                    | <b>13:13 total</b>  |           |                                               | 0   | 1   | 0    | 0    | 0   | 0   | 0   | 1     |                                                      |     |      |      |     |     |     |       |                   |
| B*13:13:01                                              | 13:13:01            | HLA01858  |                                               | 0   | 1   | 0    | 0    | 0   | 0   | 0   | 1     |                                                      |     |      |      |     |     |     |       |                   |
| B*13:14                                                 | 13:14               | HLA02360  |                                               | 0   | 0   | 7    | 0    | 0   | 0   | 0   | 7     |                                                      |     | WD   |      |     |     |     | WD    | WD                |
| B*13:15                                                 | 13:15               | HLA02389  |                                               | 0   | 0   | 2    | 0    | 0   | 0   | 0   | 2     |                                                      |     |      |      |     |     |     |       |                   |
| B*13:16                                                 | 13:16               | HLA02516  |                                               | 0   | 0   | 4    | 0    | 0   | 0   | 0   | 4     |                                                      |     |      |      |     |     |     |       |                   |
| <b>B*13:22 total</b>                                    | <b>13:22 total</b>  |           |                                               | 0   | 1   | 0    | 0    | 0   | 0   | 0   | 1     |                                                      |     |      |      |     |     |     |       |                   |
| B*13:22:01                                              | 13:22:01            | HLA03315  |                                               | 0   | 1   | 0    | 0    | 0   | 0   | 0   | 1     |                                                      |     |      |      |     |     |     |       |                   |
| B*13:31                                                 | 13:31               | HLA04436  |                                               | 0   | 0   | 1    | 0    | 0   | 0   | 0   | 1     |                                                      |     |      |      |     |     |     |       |                   |
| B*13:33                                                 | 13:33               | HLA04502  |                                               | 2   | 0   | 0    | 0    | 0   | 0   | 0   | 2     |                                                      |     |      |      |     |     |     |       |                   |
| B*13:42                                                 | 13:42               | HLA06056  |                                               | 0   | 1   | 0    | 0    | 0   | 0   | 0   | 1     |                                                      |     |      |      |     |     |     |       |                   |
| B*13:45                                                 | 13:45               | HLA06263  |                                               | 0   | 0   | 9    | 0    | 1   | 0   | 0   | 10    |                                                      |     | WD   |      |     |     |     | WD    | WD                |
| B*13:46                                                 | 13:46               | HLA06264  |                                               | 0   | 1   | 0    | 0    | 0   | 0   | 0   | 1     |                                                      |     |      |      |     |     |     |       |                   |
| B*13:47                                                 | 13:47               | HLA06933  |                                               | 0   | 0   | 5    | 0    | 0   | 0   | 0   | 5     |                                                      |     | WD   |      |     |     |     | WD    | WD                |
| B*13:50                                                 | 13:50               | HLA07033  |                                               | 1   | 0   | 0    | 0    | 0   | 0   | 0   | 1     |                                                      |     |      |      |     |     |     |       |                   |
| B*13:51                                                 | 13:51               | HLA07094  |                                               | 0   | 0   | 0    | 0    | 0   | 0   | 2   | 2     |                                                      |     |      |      |     |     |     |       |                   |
| B*13:53                                                 | 13:53               | HLA07693  |                                               | 0   | 0   | 2    | 0    | 0   | 0   | 0   | 2     |                                                      |     |      |      |     |     |     |       |                   |
| B*13:55                                                 | 13:55               | HLA07892  |                                               | 0   | 0   | 1    | 0    | 0   | 0   | 0   | 1     |                                                      |     |      |      |     |     |     |       |                   |
| <b>B*13:56N total</b>                                   | <b>13:56N total</b> |           |                                               | 0   | 0   | 1    | 0    | 0   | 0   | 0   | 1     |                                                      |     |      |      |     |     |     |       |                   |
| B*13:56:01N                                             | 13:56:01N           | HLA07915  |                                               | 0   | 0   | 1    | 0    | 0   | 0   | 0   | 1     |                                                      |     |      |      |     |     |     |       |                   |
| B*13:57                                                 | 13:57               | HLA07916  |                                               | 0   | 11  | 0    | 0    | 0   | 0   | 2   | 13    |                                                      | WD  |      |      |     |     |     | WD    | WD                |
| B*13:59                                                 | 13:59               | HLA08345  |                                               | 0   | 0   | 1    | 0    | 0   | 0   | 0   | 1     |                                                      |     |      |      |     |     |     |       |                   |
| B*13:66                                                 | 13:66               | HLA09442  |                                               | 0   | 0   | 1    | 0    | 1   | 0   | 0   | 2     |                                                      |     |      |      |     |     |     |       |                   |
| B*13:70                                                 | 13:70               | HLA09645  |                                               | 0   | 0   | 0    | 0    | 1   | 0   | 0   | 1     |                                                      |     |      |      |     |     |     |       |                   |
| B*13:74                                                 | 13:74               | HLA11013  |                                               | 1   | 0   | 0    | 0    | 0   | 0   | 0   | 1     |                                                      |     |      |      |     |     |     |       |                   |
| B*13:77                                                 | 13:77               | HLA11235  |                                               | 0   | 1   | 0    | 0    | 0   | 0   | 0   | 1     |                                                      |     |      |      |     |     |     |       |                   |
| B*13:78                                                 | 13:78               | HLA11424  |                                               | 0   | 1   | 0    | 0    | 0   | 0   | 0   | 1     |                                                      |     |      |      |     |     |     |       |                   |
| B*13:79                                                 | 13:79               | HLA11655  |                                               | 0   | 0   | 1    | 0    | 0   | 0   | 0   | 1     |                                                      |     |      |      |     |     |     |       |                   |
| B*13:81                                                 | 13:81               | HLA12134  |                                               | 0   | 0   | 1    | 0    | 0   | 0   | 0   | 1     |                                                      |     |      |      |     |     |     |       |                   |
| B*13:84                                                 | 13:84               | HLA13650  |                                               | 0   | 0   | 1    | 0    | 0   | 0   | 0   | 1     |                                                      |     |      |      |     |     |     |       |                   |
| B*13:86                                                 | 13:86               | HLA14300  |                                               | 0   | 0   | 2    | 1    | 0   | 0   | 0   | 3     |                                                      |     |      |      |     |     |     |       |                   |
| B*13:98                                                 | 13:98               | HLA16050  |                                               | 0   | 0   | 1    | 0    | 0   | 0   | 0   | 1     |                                                      |     |      |      |     |     |     |       |                   |

| Supplemental Table 9: HLA-B Allele Summary <sup>a</sup> |                        |           | Allele Count by Population Group <sup>b</sup> |             |             |               |             |              |             |              |               | 3.0.0 CIWD Category by Population Group <sup>c</sup> |          |           |          |          |          |           |           |                   |           |
|---------------------------------------------------------|------------------------|-----------|-----------------------------------------------|-------------|-------------|---------------|-------------|--------------|-------------|--------------|---------------|------------------------------------------------------|----------|-----------|----------|----------|----------|-----------|-----------|-------------------|-----------|
| Allele                                                  | Genomic typing         | Allele ID | G group                                       | AFA         | API         | EURO          | MENA        | HIS          | NAM         | UNK          | Total         | AFA                                                  | API      | EURO      | MENA     | HIS      | NAM      | UNK       | Total     | Highest Frequency |           |
| B*13:CODE                                               | 13:CODE                |           |                                               | 127         | 1458        | 16892         | 325         | 656          | 49          | 1640         | 21147         | NA                                                   | NA       | NA        | NA       | NA       | NA       | NA        | NA        | NA                | NA        |
| <b>B*14:01 total</b>                                    | <b>14:01 total</b>     |           |                                               | <b>2900</b> | <b>779</b>  | <b>73385</b>  | <b>1109</b> | <b>5632</b>  | <b>408</b>  | <b>8970</b>  | <b>93183</b>  | <b>C</b>                                             | <b>C</b> | <b>C</b>  | <b>C</b> | <b>C</b> | <b>C</b> | <b>C</b>  | <b>C</b>  | <b>C</b>          | <b>C</b>  |
| B*14:01                                                 | 14:01                  |           |                                               | 181         | 40          | 5116          | 86          | 662          | 38          | 510          | 6633          | C                                                    | I        | C         | C        | C        | C        | C         | C         | C                 | C         |
| B*14:01P                                                | 14:01P                 |           |                                               | 0           | 0           | 15            | 0           | 1            | 0           | 0            | 16            |                                                      |          | WD        |          |          |          |           | WD        | WD                |           |
| <b>B*14:01:01G total</b>                                | <b>14:01:01G total</b> |           |                                               | <b>2719</b> | <b>739</b>  | <b>68253</b>  | <b>1023</b> | <b>4969</b>  | <b>370</b>  | <b>8459</b>  | <b>86532</b>  | <b>C</b>                                             | <b>C</b> | <b>C</b>  | <b>C</b> | <b>C</b> | <b>C</b> | <b>C</b>  | <b>C</b>  | <b>C</b>          | <b>C</b>  |
| B*14:01:01G                                             | 14:01:01G              |           | 14:01:01G                                     | 17          | 41          | 3236          | 40          | 51           | 2           | 259          | 3646          | WD                                                   | I        | C         | WD       | I        |          |           | C         | C                 | C         |
| B*14:01:01                                              | 14:01:01               |           | 14:01:01G                                     | 2677        | 694         | 64696         | 982         | 4844         | 363         | 8149         | 82405         | C                                                    | C        | C         | C        | C        | C        | C         | C         | C                 | C         |
| B*14:01:01:01                                           | 14:01:01:01            | HLA00157  | 14:01:01G                                     | 25          | 4           | 320           | 1           | 74           | 5           | 51           | 480           | WD                                                   |          | I         |          | C        | WD       | I         | I         | I                 | C         |
| B*14:01:01:02                                           | 14:01:01:02            | HLA17048  | 14:01:01G                                     | 0           | 0           | 1             | 0           | 0            | 0           | 0            | 1             |                                                      |          |           |          |          |          |           |           |                   |           |
| B*14:01:03                                              | 14:01:03               | HLA09174  |                                               | 0           | 0           | 1             | 0           | 0            | 0           | 0            | 1             |                                                      |          |           |          |          |          |           |           |                   |           |
| B*14:01:04                                              | 14:01:04               | HLA10045  |                                               | 0           | 0           | 0             | 0           | 0            | 0           | 1            | 1             |                                                      |          |           |          |          |          |           |           |                   |           |
| <b>B*14:02 total</b>                                    | <b>14:02 total</b>     |           |                                               | <b>8633</b> | <b>2258</b> | <b>239888</b> | <b>9706</b> | <b>27191</b> | <b>2022</b> | <b>39519</b> | <b>329217</b> | <b>C</b>                                             | <b>C</b> | <b>C</b>  | <b>C</b> | <b>C</b> | <b>C</b> | <b>C</b>  | <b>C</b>  | <b>C</b>          | <b>C</b>  |
| B*14:02                                                 | 14:02                  |           |                                               | 508         | 80          | 15352         | 564         | 3020         | 137         | 3124         | 22785         | C                                                    | I        | C         | C        | C        | C        | C         | C         | C                 | C         |
| B*14:02P                                                | 14:02P                 |           |                                               | 0           | 0           | 88            | 0           | 0            | 0           | 1            | 89            |                                                      |          | WD        |          |          |          |           | WD        | WD                |           |
| <b>B*14:02:01G total</b>                                | <b>14:02:01G total</b> |           |                                               | <b>8115</b> | <b>2172</b> | <b>224383</b> | <b>9129</b> | <b>23920</b> | <b>1866</b> | <b>36252</b> | <b>305837</b> | <b>C</b>                                             | <b>C</b> | <b>C</b>  | <b>C</b> | <b>C</b> | <b>C</b> | <b>C</b>  | <b>C</b>  | <b>C</b>          | <b>C</b>  |
| B*14:02:01G                                             | 14:02:01G              |           | 14:02:01G                                     | 786         | 1097        | 68400         | 1862        | 2711         | 56          | 6222         | 81134         | C                                                    | C        | C         | C        | C        | C        | C         | C         | C                 | C         |
| B*14:02:01                                              | 14:02:01               |           | 14:02:01G                                     | 6438        | 988         | 147268        | 7068        | 17504        | 1515        | 28667        | 209448        | C                                                    | C        | C         | C        | C        | C        | C         | C         | C                 | C         |
| B*14:02:01:01                                           | 14:02:01:01            | HLA00158  | 14:02:01G                                     | 658         | 86          | 8547          | 199         | 3606         | 289         | 1280         | 14665         | C                                                    | I        | C         | C        | C        | C        | C         | C         | C                 | C         |
| B*14:02:01:02                                           | 14:02:01:02            | HLA13766  | 14:02:01G                                     | 4           | 0           | 159           | 0           | 8            | 0           | 19           | 190           |                                                      |          | I         |          | I        |          | I         | I         | I                 | I         |
| B*14:02:01:03                                           | 14:02:01:03            | HLA14822  | 14:02:01G                                     | 229         | 1           | 9             | 0           | 91           | 6           | 64           | 400           | C                                                    |          | WD        |          | C        | WD       | I         | I         | I                 | C         |
| B*14:02:02                                              | 14:02:02               | HLA02150  |                                               | 9           | 6           | 58            | 11          | 251          | 19          | 139          | 493           | WD                                                   | WD       | WD        | WD       | C        | C        | C         | I         | I                 | C         |
| B*14:02:03                                              | 14:02:03               | HLA04101  |                                               | 0           | 0           | 7             | 0           | 0            | 0           | 0            | 7             |                                                      |          | WD        |          |          |          |           | WD        | WD                |           |
| B*14:02:04                                              | 14:02:04               | HLA04496  |                                               | 0           | 0           | 0             | 1           | 0            | 0           | 2            | 3             |                                                      |          |           |          |          |          |           |           |                   |           |
| B*14:02:05                                              | 14:02:05               | HLA04415  |                                               | 1           | 0           | 0             | 0           | 0            | 0           | 0            | 1             |                                                      |          |           |          |          |          |           |           |                   |           |
| B*14:02:13                                              | 14:02:13               | HLA13012  |                                               | 0           | 0           | 0             | 0           | 0            | 0           | 1            | 1             |                                                      |          |           |          |          |          |           |           |                   |           |
| B*14:02:15                                              | 14:02:15               | HLA16502  |                                               | 0           | 0           | 0             | 1           | 0            | 0           | 0            | 1             |                                                      |          |           |          |          |          |           |           |                   |           |
| B*14:03                                                 | 14:03                  | HLA00159  |                                               | 929         | 6           | 156           | 71          | 153          | 25          | 206          | 1546          | C                                                    | WD       | I         | C        | C        | C        | C         | I         | I                 | C         |
| B*14:05                                                 | 14:05                  | HLA00161  |                                               | 87          | 0           | 9             | 0           | 4            | 3           | 16           | 119           | C                                                    |          | WD        |          |          |          | I         | WD        | WD                | C         |
| <b>B*14:06 total</b>                                    | <b>14:06 total</b>     |           |                                               | <b>0</b>    | <b>0</b>    | <b>85</b>     | <b>1</b>    | <b>4</b>     | <b>2</b>    | <b>10</b>    | <b>102</b>    |                                                      |          | <b>WD</b> |          |          |          | <b>WD</b> | <b>WD</b> | <b>WD</b>         | <b>WD</b> |
| B*14:06                                                 | 14:06                  |           |                                               | 0           | 0           | 15            | 1           | 0            | 0           | 0            | 16            |                                                      |          | WD        |          |          |          |           | WD        | WD                | WD        |
| B*14:06:01                                              | 14:06:01               | HLA00977  |                                               | 0           | 0           | 33            | 0           | 0            | 0           | 1            | 34            |                                                      |          | WD        |          |          |          |           | WD        | WD                | WD        |



| Supplemental Table 9: HLA-B Allele Summary <sup>a</sup> |                    |           | Allele Count by Population Group <sup>b</sup> |          |          |          |          |          |          |          |          | 3.0.0 CIWD Category by Population Group <sup>c</sup> |     |           |      |     |     |     |           |                   |
|---------------------------------------------------------|--------------------|-----------|-----------------------------------------------|----------|----------|----------|----------|----------|----------|----------|----------|------------------------------------------------------|-----|-----------|------|-----|-----|-----|-----------|-------------------|
| Allele                                                  | Genomic typing     | Allele ID | G group                                       | AFA      | API      | EURO     | MENA     | HIS      | NAM      | UNK      | Total    | AFA                                                  | API | EURO      | MENA | HIS | NAM | UNK | Total     | Highest Frequency |
| B*14:06:02                                              | 14:06:02           | HLA01052  |                                               | 0        | 0        | 37       | 0        | 4        | 2        | 9        | 52       |                                                      |     | WD        |      |     |     | WD  | WD        | WD                |
| B*14:07N                                                | 14:07N             | HLA02166  |                                               | 0        | 0        | 15       | 0        | 1        | 0        | 0        | 16       |                                                      |     | WD        |      |     |     |     | WD        | WD                |
| <b>B*14:08 total</b>                                    | <b>14:08 total</b> |           |                                               | <b>0</b> | <b>0</b> | <b>7</b> | <b>0</b> | <b>1</b> | <b>0</b> | <b>0</b> | <b>8</b> |                                                      |     | <b>WD</b> |      |     |     |     | <b>WD</b> | <b>WD</b>         |
| B*14:08                                                 | 14:08              |           |                                               | 0        | 0        | 1        | 0        | 0        | 0        | 0        | 1        |                                                      |     |           |      |     |     |     |           |                   |
| B*14:08:01                                              | 14:08:01           | HLA03283  |                                               | 0        | 0        | 6        | 0        | 1        | 0        | 0        | 7        |                                                      |     | WD        |      |     |     |     | WD        | WD                |
| B*14:09                                                 | 14:09              | HLA03318  |                                               | 8        | 0        | 0        | 0        | 0        | 0        | 1        | 9        | WD                                                   |     |           |      |     |     |     | WD        | WD                |
| B*14:10                                                 | 14:10              | HLA03639  |                                               | 0        | 0        | 37       | 0        | 0        | 0        | 0        | 37       |                                                      |     | WD        |      |     |     |     | WD        | WD                |
| B*14:12                                                 | 14:12              | HLA04027  |                                               | 1        | 0        | 0        | 0        | 0        | 0        | 1        | 2        |                                                      |     |           |      |     |     |     |           |                   |
| B*14:13                                                 | 14:13              | HLA04055  |                                               | 0        | 0        | 3        | 0        | 0        | 0        | 0        | 3        |                                                      |     |           |      |     |     |     |           |                   |
| B*14:14                                                 | 14:14              | HLA04066  |                                               | 0        | 0        | 3        | 0        | 0        | 0        | 0        | 3        |                                                      |     |           |      |     |     |     |           |                   |
| B*14:17                                                 | 14:17              | HLA04532  |                                               | 0        | 0        | 1        | 0        | 0        | 0        | 0        | 1        |                                                      |     |           |      |     |     |     |           |                   |
| B*14:18                                                 | 14:18              | HLA04565  |                                               | 0        | 0        | 3        | 0        | 0        | 0        | 0        | 3        |                                                      |     |           |      |     |     |     |           |                   |
| B*14:19                                                 | 14:19              | HLA05474  |                                               | 0        | 0        | 5        | 0        | 0        | 0        | 0        | 5        |                                                      |     | WD        |      |     |     |     | WD        | WD                |
| B*14:20                                                 | 14:20              | HLA05928  |                                               | 0        | 0        | 22       | 0        | 0        | 0        | 0        | 22       |                                                      |     | WD        |      |     |     |     | WD        | WD                |
| B*14:22                                                 | 14:22              | HLA06324  |                                               | 0        | 0        | 1        | 0        | 0        | 0        | 0        | 1        |                                                      |     |           |      |     |     |     |           |                   |
| B*14:23                                                 | 14:23              | HLA06325  |                                               | 0        | 0        | 3        | 3        | 0        | 0        | 0        | 6        |                                                      |     |           |      |     |     |     | WD        | WD                |
| B*14:24                                                 | 14:24              | HLA06357  |                                               | 0        | 0        | 1        | 0        | 0        | 0        | 0        | 1        |                                                      |     |           |      |     |     |     |           |                   |
| B*14:26                                                 | 14:26              | HLA06990  |                                               | 0        | 0        | 2        | 0        | 0        | 0        | 0        | 2        |                                                      |     |           |      |     |     |     |           |                   |
| B*14:27                                                 | 14:27              | HLA07004  |                                               | 0        | 0        | 1        | 0        | 0        | 0        | 0        | 1        |                                                      |     |           |      |     |     |     |           |                   |
| B*14:29                                                 | 14:29              | HLA07463  |                                               | 0        | 0        | 16       | 0        | 0        | 0        | 0        | 16       |                                                      |     | WD        |      |     |     |     | WD        | WD                |
| B*14:31                                                 | 14:31              | HLA07717  |                                               | 0        | 0        | 2        | 2        | 0        | 0        | 0        | 4        |                                                      |     |           |      |     |     |     |           |                   |
| B*14:32                                                 | 14:32              | HLA07725  |                                               | 0        | 0        | 6        | 0        | 0        | 0        | 0        | 6        |                                                      |     | WD        |      |     |     |     | WD        | WD                |
| B*14:34                                                 | 14:34              | HLA09585  |                                               | 0        | 0        | 1        | 0        | 0        | 0        | 0        | 1        |                                                      |     |           |      |     |     |     |           |                   |
| B*14:35                                                 | 14:35              | HLA09586  |                                               | 0        | 0        | 0        | 0        | 0        | 0        | 1        | 1        |                                                      |     |           |      |     |     |     |           |                   |
| B*14:36                                                 | 14:36              | HLA09587  |                                               | 0        | 0        | 1        | 0        | 0        | 0        | 0        | 1        |                                                      |     |           |      |     |     |     |           |                   |
| B*14:38                                                 | 14:38              | HLA10417  |                                               | 0        | 0        | 0        | 0        | 0        | 0        | 1        | 1        |                                                      |     |           |      |     |     |     |           |                   |
| B*14:45                                                 | 14:45              | HLA13014  |                                               | 0        | 0        | 3        | 0        | 0        | 0        | 0        | 3        |                                                      |     |           |      |     |     |     |           |                   |
| B*14:47                                                 | 14:47              | HLA13544  |                                               | 0        | 0        | 0        | 0        | 0        | 0        | 1        | 1        |                                                      |     |           |      |     |     |     |           |                   |
| B*14:48                                                 | 14:48              | HLA13662  |                                               | 0        | 0        | 0        | 0        | 0        | 0        | 1        | 1        |                                                      |     |           |      |     |     |     |           |                   |
| B*14:53                                                 | 14:53              | HLA14490  |                                               | 0        | 0        | 1        | 0        | 0        | 0        | 0        | 1        |                                                      |     |           |      |     |     |     |           |                   |
| B*14:56                                                 | 14:56              | HLA16820  |                                               | 0        | 0        | 1        | 0        | 0        | 0        | 0        | 1        |                                                      |     |           |      |     |     |     |           |                   |

| Supplemental Table 9: HLA-B Allele Summary <sup>a</sup> |                        |           | Allele Count by Population Group <sup>b</sup> |             |              |               |             |              |             |              |               | 3.0.0 CIWD Category by Population Group <sup>c</sup> |          |           |          |          |          |          |           |                   |
|---------------------------------------------------------|------------------------|-----------|-----------------------------------------------|-------------|--------------|---------------|-------------|--------------|-------------|--------------|---------------|------------------------------------------------------|----------|-----------|----------|----------|----------|----------|-----------|-------------------|
| Allele                                                  | Genomic typing         | Allele ID | G group                                       | AFA         | API          | EURO          | MENA        | HIS          | NAM         | UNK          | Total         | AFA                                                  | API      | EURO      | MENA     | HIS      | NAM      | UNK      | Total     | Highest Frequency |
| B*14:CODE                                               | 14:CODE                |           |                                               | 444         | 51           | 15573         | 185         | 1962         | 107         | 2776         | 21098         | NA                                                   | NA       | NA        | NA       | NA       | NA       | NA       | NA        | NA                |
| <b>B*15:01 total</b>                                    | <b>15:01 total</b>     |           |                                               | <b>3503</b> | <b>26750</b> | <b>692696</b> | <b>4801</b> | <b>18544</b> | <b>1978</b> | <b>57632</b> | <b>805904</b> | <b>C</b>                                             | <b>C</b> | <b>C</b>  | <b>C</b> | <b>C</b> | <b>C</b> | <b>C</b> | <b>C</b>  | <b>C</b>          |
| B*15:01                                                 | 15:01                  |           |                                               | 0           | 10           | 2356          | 0           | 7            | 1           | 72           | 2446          |                                                      | WD       | C         |          | WD       |          | I        | C         | C                 |
| B*15:01P                                                | 15:01P                 |           |                                               | 0           | 1            | 393           | 0           | 0            | 0           | 2            | 396           |                                                      |          | I         |          |          |          |          | I         | I                 |
| <b>B*15:01:01G total</b>                                | <b>15:01:01G total</b> |           |                                               | <b>3503</b> | <b>26462</b> | <b>689661</b> | <b>4798</b> | <b>18530</b> | <b>1977</b> | <b>57529</b> | <b>802460</b> | <b>C</b>                                             | <b>C</b> | <b>C</b>  | <b>C</b> | <b>C</b> | <b>C</b> | <b>C</b> | <b>C</b>  | <b>C</b>          |
| B*15:01:01G                                             | 15:01:01G              |           | 15:01:01G                                     | 2738        | 22931        | 656657        | 4671        | 13051        | 1462        | 52011        | 753521        | C                                                    | C        | C         | C        | C        | C        | C        | C         | C                 |
| B*15:01:01                                              | 15:01:01               |           | 15:01:01G                                     | 153         | 813          | 4905          | 25          | 1096         | 83          | 1609         | 8684          | C                                                    | C        | C         | WD       | C        | C        | C        | C         | C                 |
| B*15:01:01:01                                           | 15:01:01:01            | HLA00162  | 15:01:01G                                     | 567         | 2704         | 25694         | 93          | 4138         | 413         | 3661         | 37270         | C                                                    | C        | C         | C        | C        | C        | C        | C         | C                 |
| <b>B*15:01N total</b>                                   | <b>15:01N total</b>    |           |                                               | <b>0</b>    | <b>0</b>     | <b>7</b>      | <b>0</b>    | <b>1</b>     | <b>0</b>    | <b>0</b>     | <b>8</b>      |                                                      |          | <b>WD</b> |          |          |          |          | <b>WD</b> | <b>WD</b>         |
| B*15:01:01:02N                                          | 15:01:01:02N           | HLA00163  | 15:01:01G                                     | 0           | 0            | 7             | 0           | 1            | 0           | 0            | 8             |                                                      |          | WD        |          |          |          |          | WD        | WD                |
| B*15:01:01:03                                           | 15:01:01:03            | HLA11953  | 15:01:01G                                     | 0           | 0            | 27            | 1           | 1            | 0           | 2            | 31            |                                                      |          | WD        |          |          |          |          | WD        | WD                |
| B*15:01:01:04                                           | 15:01:01:04            | HLA14080  | 15:01:01G                                     | 33          | 9            | 1757          | 5           | 171          | 14          | 177          | 2166          | WD                                                   | WD       | C         | WD       | C        | C        | C        | C         | C                 |
| B*15:01:01:05                                           | 15:01:01:05            | HLA14851  | 15:01:01G                                     | 0           | 0            | 21            | 0           | 1            | 0           | 4            | 26            |                                                      |          | WD        |          |          |          |          | WD        | WD                |
| B*15:01:01:06                                           | 15:01:01:06            | HLA15405  | 15:01:01G                                     | 10          | 1            | 514           | 3           | 42           | 4           | 48           | 622           | WD                                                   |          | I         |          | I        |          | I        | I         | I                 |
| B*15:01:01:07                                           | 15:01:01:07            | HLA16170  | 15:01:01G                                     | 0           | 1            | 0             | 0           | 0            | 0           | 0            | 1             |                                                      |          |           |          |          |          |          |           |                   |
| B*15:01:01:08                                           | 15:01:01:08            | HLA16171  | 15:01:01G                                     | 0           | 0            | 1             | 0           | 0            | 0           | 0            | 1             |                                                      |          |           |          |          |          |          |           |                   |
| B*15:01:01:09                                           | 15:01:01:09            | HLA16172  | 15:01:01G                                     | 0           | 0            | 36            | 0           | 1            | 0           | 0            | 37            |                                                      |          | WD        |          |          |          |          | WD        | WD                |
| B*15:01:01:11                                           | 15:01:01:11            | HLA16678  | 15:01:01G                                     | 0           | 0            | 11            | 0           | 0            | 0           | 1            | 12            |                                                      |          | WD        |          |          |          |          | WD        | WD                |
| B*15:01:01:12                                           | 15:01:01:12            | HLA16853  | 15:01:01G                                     | 0           | 0            | 0             | 0           | 0            | 0           | 1            | 1             |                                                      |          |           |          |          |          |          |           |                   |
| B*15:01:06                                              | 15:01:06               | HLA03005  | 15:01:01G                                     | 0           | 0            | 11            | 0           | 0            | 0           | 4            | 15            |                                                      |          | WD        |          |          |          |          | WD        | WD                |
| B*15:01:07                                              | 15:01:07               | HLA03184  | 15:01:01G                                     | 0           | 0            | 9             | 0           | 0            | 0           | 2            | 11            |                                                      |          | WD        |          |          |          |          | WD        | WD                |
| B*15:102                                                | 15:102                 | HLA02184  | 15:01:01G                                     | 0           | 2            | 0             | 0           | 0            | 0           | 0            | 2             |                                                      |          |           |          |          |          |          |           |                   |
| B*15:146                                                | 15:146                 | HLA03287  | 15:01:01G                                     | 2           | 1            | 4             | 0           | 28           | 1           | 9            | 45            |                                                      |          |           |          | I        |          | WD       | WD        | I                 |
| B*15:228                                                | 15:228                 | HLA06903  | 15:01:01G                                     | 0           | 0            | 7             | 0           | 0            | 0           | 0            | 7             |                                                      |          | WD        |          |          |          |          | WD        | WD                |
| B*15:01:02                                              | 15:01:02               | HLA00164  |                                               | 0           | 275          | 1             | 2           | 0            | 0           | 3            | 281           |                                                      | C        |           |          |          |          |          | I         | C                 |
| B*15:01:03                                              | 15:01:03               | HLA00978  |                                               | 0           | 0            | 8             | 0           | 3            | 0           | 2            | 13            |                                                      |          | WD        |          |          |          |          | WD        | WD                |
| B*15:01:04                                              | 15:01:04               | HLA01373  |                                               | 0           | 0            | 67            | 0           | 0            | 0           | 1            | 68            |                                                      |          | WD        |          |          |          |          | WD        | WD                |
| B*15:01:08                                              | 15:01:08               | HLA03215  |                                               | 0           | 0            | 8             | 0           | 0            | 0           | 0            | 8             |                                                      |          | WD        |          |          |          |          | WD        | WD                |
| B*15:01:09                                              | 15:01:09               | HLA03964  |                                               | 0           | 0            | 1             | 0           | 0            | 0           | 0            | 1             |                                                      |          |           |          |          |          |          |           |                   |
| B*15:01:10                                              | 15:01:10               | HLA04071  |                                               | 0           | 0            | 119           | 0           | 0            | 0           | 2            | 121           |                                                      |          | WD        |          |          |          |          | WD        | WD                |
| B*15:01:11                                              | 15:01:11               | HLA04112  |                                               | 0           | 0            | 0             | 0           | 0            | 0           | 1            | 1             |                                                      |          |           |          |          |          |          |           |                   |

| Supplemental Table 9: HLA-B Allele Summary <sup>a</sup> |                        |           | Allele Count by Population Group <sup>b</sup> |              |              |              |             |             |            |             |              | 3.0.0 CIWD Category by Population Group <sup>c</sup> |          |          |          |          |          |          |          |                   |
|---------------------------------------------------------|------------------------|-----------|-----------------------------------------------|--------------|--------------|--------------|-------------|-------------|------------|-------------|--------------|------------------------------------------------------|----------|----------|----------|----------|----------|----------|----------|-------------------|
| Allele                                                  | Genomic typing         | Allele ID | G group                                       | AFA          | API          | EURO         | MENA        | HIS         | NAM        | UNK         | Total        | AFA                                                  | API      | EURO     | MENA     | HIS      | NAM      | UNK      | Total    | Highest Frequency |
| B*15:01:12                                              | 15:01:12               | HLA04216  |                                               | 0            | 0            | 11           | 0           | 0           | 0          | 0           | 11           |                                                      |          | WD       |          |          |          |          | WD       | WD                |
| B*15:01:13                                              | 15:01:13               | HLA04454  |                                               | 0            | 0            | 4            | 0           | 0           | 0          | 0           | 4            |                                                      |          |          |          |          |          |          |          |                   |
| B*15:01:14                                              | 15:01:14               | HLA04463  |                                               | 0            | 1            | 19           | 1           | 0           | 0          | 1           | 22           |                                                      |          | WD       |          |          |          |          | WD       | WD                |
| B*15:01:15                                              | 15:01:15               | HLA04464  |                                               | 0            | 0            | 18           | 0           | 0           | 0          | 0           | 18           |                                                      |          | WD       |          |          |          |          | WD       | WD                |
| B*15:01:16                                              | 15:01:16               | HLA04553  |                                               | 0            | 0            | 21           | 0           | 0           | 0          | 0           | 21           |                                                      |          | WD       |          |          |          |          | WD       | WD                |
| B*15:01:19                                              | 15:01:19               | HLA05718  |                                               | 0            | 0            | 1            | 0           | 0           | 0          | 0           | 1            |                                                      |          |          |          |          |          |          |          |                   |
| B*15:01:21                                              | 15:01:21               | HLA06133  |                                               | 0            | 0            | 8            | 0           | 0           | 0          | 0           | 8            |                                                      |          | WD       |          |          |          |          | WD       | WD                |
| B*15:01:24                                              | 15:01:24               | HLA06966  |                                               | 0            | 0            | 1            | 0           | 2           | 0          | 0           | 3            |                                                      |          |          |          |          |          |          |          |                   |
| B*15:01:25                                              | 15:01:25               | HLA07457  |                                               | 0            | 0            | 1            | 0           | 0           | 0          | 1           | 2            |                                                      |          |          |          |          |          |          |          |                   |
| B*15:01:27                                              | 15:01:27               | HLA07525  |                                               | 0            | 0            | 0            | 0           | 0           | 0          | 1           | 1            |                                                      |          |          |          |          |          |          |          |                   |
| B*15:01:31                                              | 15:01:31               | HLA08678  |                                               | 0            | 0            | 2            | 0           | 0           | 0          | 13          | 15           |                                                      |          |          |          |          |          | WD       | WD       | WD                |
| B*15:01:32                                              | 15:01:32               | HLA09175  |                                               | 0            | 0            | 0            | 0           | 3           | 0          | 0           | 3            |                                                      |          |          |          |          |          |          |          |                   |
| B*15:01:33                                              | 15:01:33               | HLA09575  |                                               | 0            | 0            | 1            | 0           | 0           | 0          | 0           | 1            |                                                      |          |          |          |          |          |          |          |                   |
| B*15:01:35                                              | 15:01:35               | HLA11025  |                                               | 0            | 1            | 1            | 0           | 0           | 0          | 1           | 3            |                                                      |          |          |          |          |          |          |          |                   |
| B*15:01:36                                              | 15:01:36               | HLA12016  |                                               | 0            | 0            | 1            | 0           | 0           | 0          | 3           | 4            |                                                      |          |          |          |          |          |          |          |                   |
| <b>B*15:02 total</b>                                    | <b>15:02 total</b>     |           |                                               | <b>117</b>   | <b>38192</b> | <b>924</b>   | <b>349</b>  | <b>142</b>  | <b>69</b>  | <b>2288</b> | <b>42081</b> | <b>C</b>                                             | <b>C</b> | <b>I</b> | <b>C</b> | <b>C</b> | <b>C</b> | <b>C</b> | <b>C</b> | <b>C</b>          |
| B*15:02                                                 | 15:02                  |           |                                               | 3            | 767          | 10           | 3           | 1           | 0          | 17          | 801          |                                                      | C        | WD       |          |          |          | I        | I        | C                 |
| B*15:02P                                                | 15:02P                 |           |                                               | 0            | 1            | 1            | 0           | 0           | 0          | 0           | 2            |                                                      |          |          |          |          |          |          |          |                   |
| <b>B*15:02:01G total</b>                                | <b>15:02:01G total</b> |           |                                               | <b>114</b>   | <b>37420</b> | <b>913</b>   | <b>346</b>  | <b>141</b>  | <b>69</b>  | <b>2271</b> | <b>41274</b> | <b>C</b>                                             | <b>C</b> | <b>I</b> | <b>C</b> | <b>C</b> | <b>C</b> | <b>C</b> | <b>C</b> | <b>C</b>          |
| B*15:02:01G                                             | 15:02:01G              |           | 15:02:01G                                     | 96           | 31941        | 879          | 323         | 93          | 45         | 1609        | 34986        | C                                                    | C        | I        | C        | C        | C        | C        | C        | C                 |
| B*15:02:01                                              | 15:02:01               | HLA00165  | 15:02:01G                                     | 18           | 5479         | 34           | 23          | 48          | 24         | 662         | 6288         | WD                                                   | C        | WD       | WD       | I        | C        | C        | C        | C                 |
| B*15:02:03                                              | 15:02:03               | HLA04471  |                                               | 0            | 1            | 0            | 0           | 0           | 0          | 0           | 1            |                                                      |          |          |          |          |          |          |          |                   |
| B*15:02:04                                              | 15:02:04               | HLA04473  |                                               | 0            | 3            | 0            | 0           | 0           | 0          | 0           | 3            |                                                      |          |          |          |          |          |          |          |                   |
| <b>B*15:03 total</b>                                    | <b>15:03 total</b>     |           |                                               | <b>22255</b> | <b>583</b>   | <b>13315</b> | <b>2376</b> | <b>6963</b> | <b>811</b> | <b>8033</b> | <b>54336</b> | <b>C</b>                                             | <b>C</b> | <b>C</b> | <b>C</b> | <b>C</b> | <b>C</b> | <b>C</b> | <b>C</b> | <b>C</b>          |
| B*15:03                                                 | 15:03                  |           |                                               | 6            | 1            | 92           | 4           | 5           | 0          | 3           | 111          | WD                                                   |          | WD       |          | WD       |          |          | WD       | WD                |
| B*15:03P                                                | 15:03P                 |           |                                               | 1            | 0            | 37           | 0           | 1           | 0          | 2           | 41           |                                                      |          | WD       |          |          |          |          | WD       | WD                |
| <b>B*15:03:01G total</b>                                | <b>15:03:01G total</b> |           |                                               | <b>22237</b> | <b>582</b>   | <b>13160</b> | <b>2369</b> | <b>6956</b> | <b>811</b> | <b>8022</b> | <b>54137</b> | <b>C</b>                                             | <b>C</b> | <b>C</b> | <b>C</b> | <b>C</b> | <b>C</b> | <b>C</b> | <b>C</b> | <b>C</b>          |
| B*15:03:01G                                             | 15:03:01G              |           | 15:03:01G                                     | 18520        | 527          | 12457        | 2297        | 5348        | 614        | 7090        | 46853        | C                                                    | C        | C        | C        | C        | C        | C        | C        | C                 |
| B*15:03:01                                              | 15:03:01               |           | 15:03:01G                                     | 249          | 13           | 26           | 1           | 137         | 9          | 68          | 503          | C                                                    | I        | WD       |          | C        | C        | I        | I        | C                 |
| B*15:03:01:01                                           | 15:03:01:01            | HLA00166  | 15:03:01G                                     | 14           | 4            | 1            | 0           | 6           | 0          | 8           | 33           | WD                                                   |          |          |          | WD       |          | WD       | WD       | WD                |
| B*15:03:01:02                                           | 15:03:01:02            | HLA14102  | 15:03:01G                                     | 3305         | 28           | 395          | 28          | 1292        | 178        | 783         | 6009         | C                                                    | I        | I        | WD       | C        | C        | C        | C        | C                 |

| Supplemental Table 9: HLA-B Allele Summary <sup>a</sup> |                        |           | Allele Count by Population Group <sup>b</sup> |           |             |             |           |             |            |            |             | 3.0.0 CIWD Category by Population Group <sup>c</sup> |          |           |           |          |          |          |          |                   |
|---------------------------------------------------------|------------------------|-----------|-----------------------------------------------|-----------|-------------|-------------|-----------|-------------|------------|------------|-------------|------------------------------------------------------|----------|-----------|-----------|----------|----------|----------|----------|-------------------|
| Allele                                                  | Genomic typing         | Allele ID | G group                                       | AFA       | API         | EURO        | MENA      | HIS         | NAM        | UNK        | Total       | AFA                                                  | API      | EURO      | MENA      | HIS      | NAM      | UNK      | Total    | Highest Frequency |
| B*15:103                                                | 15:103                 | HLA02236  | 15:03:01G                                     | 3         | 0           | 0           | 0         | 0           | 0          | 0          | 3           |                                                      |          |           |           |          |          |          |          |                   |
| B*15:220                                                | 15:220                 | HLA06273  | 15:03:01G                                     | 146       | 10          | 281         | 43        | 173         | 10         | 73         | 736         | C                                                    | WD       | I         | C         | C        | C        | I        | I        | C                 |
| B*15:03:02                                              | 15:03:02               | HLA03954  |                                               | 1         | 0           | 0           | 0         | 1           | 0          | 0          | 2           |                                                      |          |           |           |          |          |          |          |                   |
| B*15:03:03                                              | 15:03:03               | HLA03958  |                                               | 7         | 0           | 26          | 0         | 0           | 0          | 4          | 37          | WD                                                   |          | WD        |           |          |          |          | WD       | WD                |
| B*15:03:04                                              | 15:03:04               | HLA08907  |                                               | 3         | 0           | 0           | 0         | 0           | 0          | 2          | 5           |                                                      |          |           |           |          |          |          | WD       | WD                |
| B*15:03:05                                              | 15:03:05               | HLA12014  |                                               | 0         | 0           | 0           | 3         | 0           | 0          | 0          | 3           |                                                      |          |           |           |          |          |          |          |                   |
| <b>B*15:04 total</b>                                    | <b>15:04 total</b>     |           |                                               | <b>39</b> | <b>145</b>  | <b>669</b>  | <b>4</b>  | <b>1508</b> | <b>96</b>  | <b>992</b> | <b>3453</b> | <b>C</b>                                             | <b>C</b> | <b>I</b>  |           | <b>C</b> | <b>C</b> | <b>C</b> | <b>C</b> | <b>C</b>          |
| B*15:04                                                 | 15:04                  |           |                                               | 16        | 8           | 258         | 2         | 483         | 48         | 262        | 1077        | WD                                                   | WD       | I         |           | C        | C        | C        | I        | C                 |
| B*15:04P                                                | 15:04P                 |           |                                               | 0         | 0           | 1           | 0         | 0           | 0          | 0          | 1           |                                                      |          |           |           |          |          |          |          |                   |
| <b>B*15:04:01G total</b>                                | <b>15:04:01G total</b> |           |                                               | <b>23</b> | <b>137</b>  | <b>409</b>  | <b>2</b>  | <b>1025</b> | <b>48</b>  | <b>730</b> | <b>2374</b> | <b>WD</b>                                            | <b>C</b> | <b>I</b>  |           | <b>C</b> | <b>C</b> | <b>C</b> | <b>C</b> | <b>C</b>          |
| B*15:04:01G                                             | 15:04:01G              |           | 15:04:01G                                     | 2         | 99          | 349         | 0         | 532         | 1          | 606        | 1589        |                                                      | I        | I         |           | C        |          | C        | I        | C                 |
| B*15:04:01                                              | 15:04:01               |           | 15:04:01G                                     | 13        | 35          | 47          | 2         | 358         | 29         | 88         | 572         | WD                                                   | I        | WD        |           | C        | C        | I        | I        | C                 |
| B*15:04:01:01                                           | 15:04:01:01            | HLA00167  | 15:04:01G                                     | 5         | 0           | 4           | 0         | 50          | 0          | 16         | 75          | WD                                                   |          |           |           | I        |          | I        | WD       | I                 |
| B*15:04:01:02                                           | 15:04:01:02            | HLA14852  | 15:04:01G                                     | 3         | 3           | 7           | 0         | 81          | 18         | 20         | 132         |                                                      |          | WD        |           | C        | C        | I        | WD       | C                 |
| B*15:04:04                                              | 15:04:04               | HLA14857  | 15:04:01G                                     | 0         | 0           | 2           | 0         | 4           | 0          | 0          | 6           |                                                      |          |           |           |          |          |          | WD       | WD                |
| B*15:04:02                                              | 15:04:02               | HLA11240  |                                               | 0         | 0           | 1           | 0         | 0           | 0          | 0          | 1           |                                                      |          |           |           |          |          |          |          |                   |
| <b>B*15:05 total</b>                                    | <b>15:05 total</b>     |           |                                               | <b>24</b> | <b>5634</b> | <b>114</b>  | <b>27</b> | <b>142</b>  | <b>24</b>  | <b>154</b> | <b>6119</b> | <b>WD</b>                                            | <b>C</b> | <b>WD</b> | <b>WD</b> | <b>C</b> | <b>C</b> | <b>C</b> | <b>C</b> | <b>C</b>          |
| B*15:05                                                 | 15:05                  |           |                                               | 0         | 228         | 15          | 1         | 27          | 2          | 13         | 286         |                                                      | C        | WD        |           | I        |          | WD       | I        | C                 |
| B*15:05P                                                | 15:05P                 |           |                                               | 0         | 0           | 0           | 1         | 0           | 0          | 0          | 1           |                                                      |          |           |           |          |          |          |          |                   |
| B*15:05:01                                              | 15:05:01               | HLA00168  |                                               | 24        | 5404        | 91          | 25        | 115         | 22         | 141        | 5822        | WD                                                   | C        | WD        | WD        | C        | C        | C        | C        | C                 |
| B*15:05:02                                              | 15:05:02               | HLA04569  |                                               | 0         | 0           | 8           | 0         | 0           | 0          | 0          | 8           |                                                      |          | WD        |           |          |          |          | WD       | WD                |
| B*15:05:03                                              | 15:05:03               | HLA16932  |                                               | 0         | 2           | 0           | 0         | 0           | 0          | 0          | 2           |                                                      |          |           |           |          |          |          |          |                   |
| B*15:06                                                 | 15:06                  | HLA00169  |                                               | 0         | 180         | 12          | 1         | 13          | 0          | 80         | 286         |                                                      | C        | WD        |           | I        |          | I        | I        | C                 |
| <b>B*15:07 total</b>                                    | <b>15:07 total</b>     |           |                                               | <b>63</b> | <b>752</b>  | <b>5758</b> | <b>9</b>  | <b>338</b>  | <b>138</b> | <b>831</b> | <b>7889</b> | <b>C</b>                                             | <b>C</b> | <b>C</b>  | <b>WD</b> | <b>C</b> | <b>C</b> | <b>C</b> | <b>C</b> | <b>C</b>          |
| B*15:07                                                 | 15:07                  |           |                                               | 29        | 335         | 1565        | 5         | 110         | 64         | 310        | 2418        | WD                                                   | C        | C         | WD        | C        | C        | C        | C        | C                 |
| B*15:07P                                                | 15:07P                 |           |                                               | 0         | 0           | 0           | 0         | 0           | 0          | 1          | 1           |                                                      |          |           |           |          |          |          |          |                   |
| <b>B*15:07:01G total</b>                                | <b>15:07:01G total</b> |           |                                               | <b>34</b> | <b>417</b>  | <b>4193</b> | <b>4</b>  | <b>228</b>  | <b>74</b>  | <b>519</b> | <b>5469</b> | <b>WD</b>                                            | <b>C</b> | <b>C</b>  |           | <b>C</b> | <b>C</b> | <b>C</b> | <b>C</b> | <b>C</b>          |
| B*15:07:01G                                             | 15:07:01G              |           | 15:07:01G                                     | 15        | 212         | 3803        | 4         | 156         | 35         | 402        | 4627        | WD                                                   | C        | C         |           | C        | C        | C        | C        | C                 |
| B*15:07:01                                              | 15:07:01               |           | 15:07:01G                                     | 17        | 200         | 286         | 0         | 66          | 37         | 102        | 708         | WD                                                   | C        | I         |           | I        | C        | I        | I        | C                 |
| B*15:07:01:01                                           | 15:07:01:01            | HLA00170  | 15:07:01G                                     | 0         | 5           | 3           | 0         | 1           | 2          | 0          | 11          |                                                      | WD       |           |           |          |          |          | WD       | WD                |
| B*15:07:01:02                                           | 15:07:01:02            | HLA16679  | 15:07:01G                                     | 2         | 0           | 101         | 0         | 5           | 0          | 15         | 123         |                                                      |          | WD        |           | WD       |          | I        | WD       | I                 |

| Supplemental Table 9: HLA-B Allele Summary <sup>a</sup> |                        |           | Allele Count by Population Group <sup>b</sup> |              |             |             |             |             |            |             |              | 3.0.0 CIWD Category by Population Group <sup>c</sup> |          |           |           |           |          |          |          |                   |
|---------------------------------------------------------|------------------------|-----------|-----------------------------------------------|--------------|-------------|-------------|-------------|-------------|------------|-------------|--------------|------------------------------------------------------|----------|-----------|-----------|-----------|----------|----------|----------|-------------------|
| Allele                                                  | Genomic typing         | Allele ID | G group                                       | AFA          | API         | EURO        | MENA        | HIS         | NAM        | UNK         | Total        | AFA                                                  | API      | EURO      | MENA      | HIS       | NAM      | UNK      | Total    | Highest Frequency |
| B*15:07:03                                              | 15:07:03               | HLA10692  |                                               | 0            | 0           | 0           | 0           | 0           | 0          | 1           | 1            |                                                      |          |           |           |           |          |          |          |                   |
| <b>B*15:08 total</b>                                    | <b>15:08 total</b>     |           |                                               | <b>26</b>    | <b>3517</b> | <b>2408</b> | <b>1286</b> | <b>301</b>  | <b>35</b>  | <b>468</b>  | <b>8041</b>  | <b>WD</b>                                            | <b>C</b> | <b>C</b>  | <b>C</b>  | <b>C</b>  | <b>C</b> | <b>C</b> | <b>C</b> | <b>C</b>          |
| B*15:08                                                 | 15:08                  |           |                                               | 19           | 836         | 838         | 413         | 110         | 15         | 172         | 2403         | WD                                                   | C        | I         | C         | C         | C        | C        | C        | C                 |
| B*15:08P                                                | 15:08P                 |           |                                               | 0            | 0           | 2           | 0           | 0           | 0          | 0           | 2            |                                                      |          |           |           |           |          |          |          |                   |
| B*15:08:01                                              | 15:08:01               | HLA00171  |                                               | 7            | 2681        | 1568        | 873         | 191         | 20         | 296         | 5636         | WD                                                   | C        | C         | C         | C         | C        | C        | C        | C                 |
| <b>B*15:09 total</b>                                    | <b>15:09 total</b>     |           |                                               | <b>37</b>    | <b>93</b>   | <b>3666</b> | <b>212</b>  | <b>459</b>  | <b>40</b>  | <b>400</b>  | <b>4907</b>  | <b>WD</b>                                            | <b>I</b> | <b>C</b>  | <b>C</b>  | <b>C</b>  | <b>C</b> | <b>C</b> | <b>C</b> | <b>C</b>          |
| <b>B*15:09:01G total</b>                                | <b>15:09:01G total</b> |           |                                               | <b>37</b>    | <b>93</b>   | <b>3666</b> | <b>212</b>  | <b>459</b>  | <b>40</b>  | <b>400</b>  | <b>4907</b>  | <b>WD</b>                                            | <b>I</b> | <b>C</b>  | <b>C</b>  | <b>C</b>  | <b>C</b> | <b>C</b> | <b>C</b> | <b>C</b>          |
| B*15:09                                                 | 15:09                  |           | 15:09:01G                                     | 37           | 61          | 3459        | 203         | 450         | 40         | 396         | 4646         | WD                                                   | I        | C         | C         | C         | C        | C        | C        | C                 |
| B*15:09P                                                | 15:09P                 |           |                                               | 0            | 0           | 1           | 0           | 0           | 0          | 0           | 1            |                                                      |          |           |           |           |          |          |          |                   |
| B*15:09:01G                                             | 15:09:01G              |           | 15:09:01G                                     | 0            | 32          | 201         | 8           | 3           | 0          | 4           | 248          |                                                      | I        | I         | WD        |           |          |          | I        | I                 |
| B*15:09:01                                              | 15:09:01               | HLA00172  | 15:09:01G                                     | 0            | 0           | 5           | 1           | 6           | 0          | 0           | 12           |                                                      |          | WD        |           | WD        |          |          | WD       | WD                |
| <b>B*15:10 total</b>                                    | <b>15:10 total</b>     |           |                                               | <b>12912</b> | <b>339</b>  | <b>2706</b> | <b>756</b>  | <b>2620</b> | <b>462</b> | <b>3541</b> | <b>23336</b> | <b>C</b>                                             | <b>C</b> | <b>C</b>  | <b>C</b>  | <b>C</b>  | <b>C</b> | <b>C</b> | <b>C</b> | <b>C</b>          |
| B*15:10                                                 | 15:10                  |           |                                               | 949          | 19          | 274         | 16          | 360         | 44         | 227         | 1889         | C                                                    | I        | I         | WD        | C         | C        | C        | C        | C                 |
| B*15:10P                                                | 15:10P                 |           |                                               | 0            | 0           | 4           | 0           | 0           | 0          | 1           | 5            |                                                      |          |           |           |           |          |          | WD       | WD                |
| B*15:10:01                                              | 15:10:01               | HLA00173  |                                               | 11957        | 320         | 2428        | 740         | 2260        | 418        | 3312        | 21435        | C                                                    | C        | C         | C         | C         | C        | C        | C        | C                 |
| B*15:10:02                                              | 15:10:02               | HLA04448  |                                               | 6            | 0           | 0           | 0           | 0           | 0          | 1           | 7            | WD                                                   |          |           |           |           |          |          | WD       | WD                |
| <b>B*15:11 total</b>                                    | <b>15:11 total</b>     |           |                                               | <b>4</b>     | <b>2511</b> | <b>238</b>  | <b>71</b>   | <b>13</b>   | <b>0</b>   | <b>302</b>  | <b>3139</b>  |                                                      | <b>C</b> | <b>I</b>  | <b>C</b>  | <b>I</b>  |          | <b>C</b> | <b>C</b> | <b>C</b>          |
| B*15:11                                                 | 15:11                  |           |                                               | 0            | 414         | 39          | 9           | 6           | 0          | 28          | 496          |                                                      | C        | WD        | WD        | WD        |          |          | I        | I                 |
| B*15:11P                                                | 15:11P                 |           |                                               | 0            | 0           | 1           | 0           | 0           | 0          | 0           | 1            |                                                      |          |           |           |           |          |          |          |                   |
| <b>B*15:11:01G total</b>                                | <b>15:11:01G total</b> |           |                                               | <b>4</b>     | <b>2097</b> | <b>198</b>  | <b>62</b>   | <b>7</b>    | <b>0</b>   | <b>274</b>  | <b>2642</b>  |                                                      | <b>C</b> | <b>I</b>  | <b>C</b>  | <b>WD</b> |          | <b>C</b> | <b>C</b> | <b>C</b>          |
| B*15:11:01G                                             | 15:11:01G              |           | 15:11:01G                                     | 2            | 1480        | 190         | 59          | 5           | 0          | 190         | 1926         |                                                      | C        | I         | C         | WD        |          |          | C        | C                 |
| B*15:11:01                                              | 15:11:01               | HLA00174  | 15:11:01G                                     | 2            | 615         | 8           | 3           | 2           | 0          | 84          | 714          |                                                      | C        | WD        |           |           |          |          | I        | I                 |
| B*15:367                                                | 15:367                 | HLA13759  | 15:11:01G                                     | 0            | 2           | 0           | 0           | 0           | 0          | 0           | 2            |                                                      |          |           |           |           |          |          |          |                   |
| <b>B*15:12 total</b>                                    | <b>15:12 total</b>     |           |                                               | <b>1</b>     | <b>1973</b> | <b>66</b>   | <b>3</b>    | <b>17</b>   | <b>0</b>   | <b>143</b>  | <b>2203</b>  |                                                      | <b>C</b> | <b>WD</b> |           | <b>I</b>  |          | <b>C</b> | <b>C</b> | <b>C</b>          |
| <b>B*15:12:01G total</b>                                | <b>15:12:01G total</b> |           |                                               | <b>1</b>     | <b>1973</b> | <b>66</b>   | <b>3</b>    | <b>17</b>   | <b>0</b>   | <b>143</b>  | <b>2203</b>  |                                                      | <b>C</b> | <b>WD</b> |           | <b>I</b>  |          | <b>C</b> | <b>C</b> | <b>C</b>          |
| B*15:12                                                 | 15:12                  | HLA00175  | 15:12:01G                                     | 0            | 413         | 3           | 0           | 3           | 0          | 33          | 452          |                                                      | C        |           |           |           |          |          | I        | I                 |
| B*15:12:01G                                             | 15:12:01G              |           | 15:12:01G                                     | 1            | 1539        | 63          | 3           | 12          | 0          | 101         | 1719         |                                                      | C        | WD        |           | I         |          |          | I        | C                 |
| B*15:19                                                 | 15:19                  | HLA00182  | 15:12:01G                                     | 0            | 21          | 0           | 0           | 2           | 0          | 9           | 32           |                                                      | I        |           |           |           |          |          | WD       | WD                |
| <b>B*15:13 total</b>                                    | <b>15:13 total</b>     |           |                                               | <b>88</b>    | <b>2239</b> | <b>135</b>  | <b>36</b>   | <b>26</b>   | <b>3</b>   | <b>432</b>  | <b>2959</b>  | <b>C</b>                                             | <b>C</b> | <b>I</b>  | <b>WD</b> | <b>I</b>  |          | <b>C</b> | <b>C</b> | <b>C</b>          |
| B*15:13                                                 | 15:13                  |           |                                               | 9            | 178         | 18          | 2           | 4           | 1          | 45          | 257          | WD                                                   | C        | WD        |           |           |          |          | I        | I                 |
| B*15:13:01                                              | 15:13:01               | HLA00176  |                                               | 79           | 2061        | 116         | 34          | 22          | 2          | 387         | 2701         | C                                                    | C        | WD        | WD        | I         |          |          | C        | C                 |

| Supplemental Table 9: HLA-B Allele Summary <sup>a</sup> |                        |           | Allele Count by Population Group <sup>b</sup> |             |              |              |             |             |            |             |              | 3.0.0 CIWD Category by Population Group <sup>c</sup> |          |          |          |          |          |          |          |                   |
|---------------------------------------------------------|------------------------|-----------|-----------------------------------------------|-------------|--------------|--------------|-------------|-------------|------------|-------------|--------------|------------------------------------------------------|----------|----------|----------|----------|----------|----------|----------|-------------------|
| Allele                                                  | Genomic typing         | Allele ID | G group                                       | AFA         | API          | EURO         | MENA        | HIS         | NAM        | UNK         | Total        | AFA                                                  | API      | EURO     | MENA     | HIS      | NAM      | UNK      | Total    | Highest Frequency |
| B*15:13:02                                              | 15:13:02               | HLA06965  |                                               | 0           | 0            | 1            | 0           | 0           | 0          | 0           | 1            |                                                      |          |          |          |          |          |          |          |                   |
| B*15:14                                                 | 15:14                  | HLA00177  |                                               | 0           | 0            | 111          | 0           | 0           | 0          | 10          | 121          |                                                      |          | WD       |          |          |          | WD       | WD       | WD                |
| B*15:15                                                 | 15:15                  | HLA00178  |                                               | 52          | 56           | 421          | 12          | 5631        | 307        | 907         | 7386         | C                                                    | I        | I        | WD       | C        | C        | C        | C        | C                 |
| <b>B*15:16 total</b>                                    | <b>15:16 total</b>     |           |                                               | <b>6420</b> | <b>65</b>    | <b>3816</b>  | <b>213</b>  | <b>2045</b> | <b>377</b> | <b>2447</b> | <b>15383</b> | <b>C</b>                                             | <b>I</b> | <b>C</b> | <b>C</b> | <b>C</b> | <b>C</b> | <b>C</b> | <b>C</b> | <b>C</b>          |
| B*15:16                                                 | 15:16                  |           |                                               | 407         | 7            | 438          | 4           | 252         | 37         | 190         | 1335         | C                                                    | WD       | I        |          | C        | C        | C        | I        | C                 |
| B*15:16P                                                | 15:16P                 |           |                                               | 0           | 0            | 1            | 0           | 0           | 0          | 0           | 1            |                                                      |          |          |          |          |          |          |          |                   |
| <b>B*15:16:01G total</b>                                | <b>15:16:01G total</b> |           |                                               | <b>6005</b> | <b>58</b>    | <b>3377</b>  | <b>209</b>  | <b>1793</b> | <b>340</b> | <b>2254</b> | <b>14036</b> | <b>C</b>                                             | <b>I</b> | <b>C</b> | <b>C</b> | <b>C</b> | <b>C</b> | <b>C</b> | <b>C</b> | <b>C</b>          |
| B*15:16:01G                                             | 15:16:01G              |           | 15:16:01G                                     | 395         | 14           | 707          | 27          | 134         | 0          | 306         | 1583         | C                                                    | I        | I        | WD       | C        |          | C        | I        | C                 |
| B*15:16:01                                              | 15:16:01               |           | 15:16:01G                                     | 4790        | 41           | 2492         | 174         | 1330        | 273        | 1697        | 10797        | C                                                    | I        | C        | C        | C        | C        | C        | C        | C                 |
| B*15:16:01:01                                           | 15:16:01:01            | HLA00179  | 15:16:01G                                     | 0           | 0            | 3            | 0           | 0           | 0          | 0           | 3            |                                                      |          |          |          |          |          |          |          |                   |
| B*15:16:01:02                                           | 15:16:01:02            | HLA14806  | 15:16:01G                                     | 820         | 3            | 175          | 8           | 329         | 67         | 251         | 1653         | C                                                    |          | I        | WD       | C        | C        | C        | C        | C                 |
| B*15:16:02                                              | 15:16:02               | HLA06327  |                                               | 6           | 0            | 0            | 0           | 0           | 0          | 3           | 9            | WD                                                   |          |          |          |          |          |          | WD       | WD                |
| B*15:16:03                                              | 15:16:03               | HLA06992  |                                               | 2           | 0            | 0            | 0           | 0           | 0          | 0           | 2            |                                                      |          |          |          |          |          |          |          |                   |
| <b>B*15:17 total</b>                                    | <b>15:17 total</b>     |           |                                               | <b>2097</b> | <b>12005</b> | <b>47557</b> | <b>6335</b> | <b>3867</b> | <b>354</b> | <b>8981</b> | <b>81196</b> | <b>C</b>                                             | <b>C</b> | <b>C</b> | <b>C</b> | <b>C</b> | <b>C</b> | <b>C</b> | <b>C</b> | <b>C</b>          |
| B*15:17                                                 | 15:17                  |           |                                               | 185         | 203          | 4013         | 601         | 623         | 40         | 678         | 6343         | C                                                    | C        | C        | C        | C        | C        | C        | C        | C                 |
| B*15:17P                                                | 15:17P                 |           |                                               | 0           | 1            | 42           | 1           | 0           | 0          | 0           | 44           |                                                      |          | WD       |          |          |          |          | WD       | WD                |
| <b>B*15:17:01G total</b>                                | <b>15:17:01G total</b> |           |                                               | <b>1911</b> | <b>11801</b> | <b>43415</b> | <b>5723</b> | <b>3243</b> | <b>314</b> | <b>8285</b> | <b>74692</b> | <b>C</b>                                             | <b>C</b> | <b>C</b> | <b>C</b> | <b>C</b> | <b>C</b> | <b>C</b> | <b>C</b> | <b>C</b>          |
| B*15:17:01G                                             | 15:17:01G              |           | 15:17:01G                                     | 498         | 10214        | 29871        | 4261        | 942         | 20         | 2370        | 48176        | C                                                    | C        | C        | C        | C        | C        | C        | C        | C                 |
| B*15:17:01                                              | 15:17:01               |           | 15:17:01G                                     | 1053        | 1097         | 11635        | 1289        | 1539        | 206        | 5567        | 22386        | C                                                    | C        | C        | C        | C        | C        | C        | C        | C                 |
| B*15:17:01:01                                           | 15:17:01:01            | HLA00180  | 15:17:01G                                     | 359         | 490          | 1898         | 173         | 761         | 88         | 345         | 4114         | C                                                    | C        | C        | C        | C        | C        | C        | C        | C                 |
| B*15:17:01:02                                           | 15:17:01:02            | HLA01439  | 15:17:01G                                     | 1           | 0            | 11           | 0           | 1           | 0          | 3           | 16           |                                                      |          | WD       |          |          |          |          | WD       | WD                |
| B*15:17:02                                              | 15:17:02               | HLA02141  |                                               | 1           | 0            | 85           | 10          | 1           | 0          | 18          | 115          |                                                      |          | WD       | WD       |          |          |          | I        | WD                |
| B*15:17:04                                              | 15:17:04               | HLA14012  |                                               | 0           | 0            | 2            | 0           | 0           | 0          | 0           | 2            |                                                      |          |          |          |          |          |          |          |                   |
| <b>B*15:18 total</b>                                    | <b>15:18 total</b>     |           |                                               | <b>492</b>  | <b>18871</b> | <b>20526</b> | <b>876</b>  | <b>1539</b> | <b>266</b> | <b>2671</b> | <b>45241</b> | <b>C</b>                                             | <b>C</b> | <b>C</b> | <b>C</b> | <b>C</b> | <b>C</b> | <b>C</b> | <b>C</b> | <b>C</b>          |
| B*15:18                                                 | 15:18                  |           |                                               | 2           | 406          | 395          | 33          | 1           | 0          | 34          | 871          |                                                      | C        | I        | WD       |          |          |          | I        | I                 |
| B*15:18P                                                | 15:18P                 |           |                                               | 0           | 0            | 29           | 0           | 0           | 0          | 0           | 29           |                                                      |          | WD       |          |          |          |          | WD       | WD                |
| <b>B*15:18:01G total</b>                                | <b>15:18:01G total</b> |           |                                               | <b>490</b>  | <b>18466</b> | <b>20095</b> | <b>843</b>  | <b>1538</b> | <b>266</b> | <b>2637</b> | <b>44335</b> | <b>C</b>                                             | <b>C</b> | <b>C</b> | <b>C</b> | <b>C</b> | <b>C</b> | <b>C</b> | <b>C</b> | <b>C</b>          |
| B*15:18:01G                                             | 15:18:01G              |           | 15:18:01G                                     | 373         | 17318        | 18728        | 825         | 1105        | 201        | 2239        | 40789        | C                                                    | C        | C        | C        | C        | C        | C        | C        | C                 |
| B*15:18:01                                              | 15:18:01               |           | 15:18:01G                                     | 115         | 1126         | 1337         | 18          | 420         | 62         | 391         | 3469         | C                                                    | C        | C        | WD       | C        | C        | C        | C        | C                 |
| B*15:18:01:02                                           | 15:18:01:02            | HLA14853  | 15:18:01G                                     | 0           | 0            | 5            | 0           | 0           | 0          | 0           | 5            |                                                      |          | WD       |          |          |          |          | WD       | WD                |
| B*15:18:01:03                                           | 15:18:01:03            | HLA16754  | 15:18:01G                                     | 2           | 19           | 25           | 0           | 13          | 3          | 7           | 69           |                                                      | I        | WD       |          | I        |          |          | WD       | WD                |

| Supplemental Table 9: HLA-B Allele Summary <sup>a</sup> |                        |           | Allele Count by Population Group <sup>b</sup> |           |             |             |           |            |           |            |              | 3.0.0 CIWD Category by Population Group <sup>c</sup> |          |          |           |          |          |          |          |                   |
|---------------------------------------------------------|------------------------|-----------|-----------------------------------------------|-----------|-------------|-------------|-----------|------------|-----------|------------|--------------|------------------------------------------------------|----------|----------|-----------|----------|----------|----------|----------|-------------------|
| Allele                                                  | Genomic typing         | Allele ID | G group                                       | AFA       | API         | EURO        | MENA      | HIS        | NAM       | UNK        | Total        | AFA                                                  | API      | EURO     | MENA      | HIS      | NAM      | UNK      | Total    | Highest Frequency |
| B*15:198                                                | 15:198                 | HLA05265  | 15:18:01G                                     | 0         | 1           | 0           | 0         | 0          | 0         | 0          | 1            |                                                      |          |          |           |          |          |          |          |                   |
| B*15:380N                                               | 15:380N                | HLA14651  | 15:18:01G                                     | 0         | 1           | 0           | 0         | 0          | 0         | 0          | 1            |                                                      |          |          |           |          |          |          |          |                   |
| B*15:388                                                | 15:388                 | HLA14874  | 15:18:01G                                     | 0         | 1           | 0           | 0         | 0          | 0         | 0          | 1            |                                                      |          |          |           |          |          |          |          |                   |
| B*15:18:02                                              | 15:18:02               | HLA04093  |                                               | 0         | 0           | 3           | 0         | 0          | 0         | 0          | 3            |                                                      |          |          |           |          |          |          |          |                   |
| B*15:18:03                                              | 15:18:03               | HLA04023  |                                               | 0         | 0           | 4           | 0         | 0          | 0         | 0          | 4            |                                                      |          |          |           |          |          |          |          |                   |
| <b>B*15:20 total</b>                                    | <b>15:20 total</b>     |           |                                               | <b>25</b> | <b>0</b>    | <b>200</b>  | <b>1</b>  | <b>411</b> | <b>43</b> | <b>257</b> | <b>937</b>   | <b>WD</b>                                            |          | <b>I</b> |           | <b>C</b> | <b>C</b> | <b>C</b> | <b>I</b> | <b>C</b>          |
| B*15:20                                                 | 15:20                  | HLA00183  |                                               | 25        | 0           | 200         | 1         | 411        | 43        | 257        | 937          | WD                                                   |          | I        |           | C        | C        | C        | I        | C                 |
| <b>B*15:21 total</b>                                    | <b>15:21 total</b>     |           |                                               | <b>6</b>  | <b>3031</b> | <b>169</b>  | <b>14</b> | <b>51</b>  | <b>2</b>  | <b>837</b> | <b>4110</b>  | <b>WD</b>                                            | <b>C</b> | <b>I</b> | <b>WD</b> | <b>I</b> |          | <b>C</b> | <b>C</b> | <b>C</b>          |
| <b>B*15:21:01G total</b>                                | <b>15:21:01G total</b> |           |                                               | <b>6</b>  | <b>3031</b> | <b>169</b>  | <b>14</b> | <b>51</b>  | <b>2</b>  | <b>837</b> | <b>4110</b>  | <b>WD</b>                                            | <b>C</b> | <b>I</b> | <b>WD</b> | <b>I</b> |          | <b>C</b> | <b>C</b> | <b>C</b>          |
| B*15:21                                                 | 15:21                  |           | 15:21:01G                                     | 6         | 3007        | 169         | 14        | 51         | 2         | 837        | 4086         | WD                                                   | C        | I        | WD        | I        |          | C        | C        | C                 |
| B*15:21:01G                                             | 15:21:01G              |           | 15:21:01G                                     | 0         | 24          | 0           | 0         | 0          | 0         | 0          | 24           |                                                      | I        |          |           |          |          |          | WD       | I                 |
| B*15:23                                                 | 15:23                  | HLA00186  |                                               | 15        | 4           | 439         | 2         | 19         | 1         | 40         | 520          | WD                                                   |          | I        |           | I        |          | I        | I        | I                 |
| <b>B*15:24 total</b>                                    | <b>15:24 total</b>     |           |                                               | <b>19</b> | <b>13</b>   | <b>4920</b> | <b>50</b> | <b>104</b> | <b>8</b>  | <b>473</b> | <b>5587</b>  | <b>WD</b>                                            | <b>I</b> | <b>C</b> | <b>C</b>  | <b>C</b> | <b>C</b> | <b>C</b> | <b>C</b> | <b>C</b>          |
| B*15:24                                                 | 15:24                  |           |                                               | 4         | 0           | 909         | 7         | 29         | 2         | 95         | 1046         |                                                      |          | I        | WD        | I        |          | I        | I        | I                 |
| B*15:24P                                                | 15:24P                 |           |                                               | 0         | 0           | 4           | 0         | 0          | 0         | 0          | 4            |                                                      |          |          |           |          |          |          |          |                   |
| B*15:24:01                                              | 15:24:01               | HLA00187  |                                               | 15        | 13          | 4004        | 43        | 75         | 6         | 378        | 4534         | WD                                                   | I        | C        | C         | C        | WD       | C        | C        | C                 |
| B*15:24:02                                              | 15:24:02               | HLA09307  |                                               | 0         | 0           | 3           | 0         | 0          | 0         | 0          | 3            |                                                      |          |          |           |          |          |          |          |                   |
| <b>B*15:25 total</b>                                    | <b>15:25 total</b>     |           |                                               | <b>40</b> | <b>9348</b> | <b>181</b>  | <b>48</b> | <b>50</b>  | <b>24</b> | <b>406</b> | <b>10097</b> | <b>C</b>                                             | <b>C</b> | <b>I</b> | <b>C</b>  | <b>I</b> | <b>C</b> | <b>C</b> | <b>C</b> | <b>C</b>          |
| B*15:25                                                 | 15:25                  |           |                                               | 12        | 809         | 14          | 2         | 8          | 3         | 44         | 892          | WD                                                   | C        | WD       |           | I        |          | I        | I        | C                 |
| <b>B*15:25:01G total</b>                                | <b>15:25:01G total</b> |           |                                               | <b>28</b> | <b>8536</b> | <b>167</b>  | <b>46</b> | <b>42</b>  | <b>21</b> | <b>362</b> | <b>9202</b>  | <b>WD</b>                                            | <b>C</b> | <b>I</b> | <b>C</b>  | <b>I</b> | <b>C</b> | <b>C</b> | <b>C</b> | <b>C</b>          |
| B*15:25:01G                                             | 15:25:01G              |           | 15:25:01G                                     | 15        | 7061        | 163         | 39        | 31         | 12        | 247        | 7568         | WD                                                   | C        | I        | WD        | I        | C        | C        | C        | C                 |
| B*15:25:01                                              | 15:25:01               | HLA00188  | 15:25:01G                                     | 13        | 1474        | 4           | 7         | 11         | 9         | 115        | 1633         | WD                                                   | C        |          | WD        | I        | C        | I        | C        | C                 |
| B*15:271                                                | 15:271                 | HLA09329  | 15:25:01G                                     | 0         | 1           | 0           | 0         | 0          | 0         | 0          | 1            |                                                      |          |          |           |          |          |          |          |                   |
| B*15:25:02                                              | 15:25:02               | HLA03906  |                                               | 0         | 3           | 0           | 0         | 0          | 0         | 0          | 3            |                                                      |          |          |           |          |          |          |          |                   |
| <b>B*15:27 total</b>                                    | <b>15:27 total</b>     |           |                                               | <b>2</b>  | <b>1611</b> | <b>147</b>  | <b>9</b>  | <b>76</b>  | <b>0</b>  | <b>261</b> | <b>2106</b>  |                                                      | <b>C</b> | <b>I</b> | <b>WD</b> | <b>C</b> |          | <b>C</b> | <b>C</b> | <b>C</b>          |
| B*15:27                                                 | 15:27                  |           |                                               | 0         | 77          | 48          | 0         | 19         | 0         | 33         | 177          |                                                      | I        | WD       |           | I        |          | I        | I        | I                 |
| B*15:27:01                                              | 15:27:01               | HLA00190  |                                               | 2         | 1533        | 38          | 9         | 3          | 0         | 129        | 1714         |                                                      | C        | WD       | WD        |          |          | I        | C        | C                 |
| B*15:27:02                                              | 15:27:02               | HLA03103  |                                               | 0         | 0           | 61          | 0         | 54         | 0         | 99         | 214          |                                                      |          | WD       |           | I        |          | I        | I        | I                 |
| B*15:27:03                                              | 15:27:03               | HLA03302  |                                               | 0         | 1           | 0           | 0         | 0          | 0         | 0          | 1            |                                                      |          |          |           |          |          |          |          |                   |
| <b>B*15:28 total</b>                                    | <b>15:28 total</b>     |           |                                               | <b>0</b>  | <b>1</b>    | <b>0</b>    | <b>0</b>  | <b>0</b>   | <b>0</b>  | <b>3</b>   | <b>4</b>     |                                                      |          |          |           |          |          |          |          |                   |
| <b>B*15:28:01G total</b>                                | <b>15:28:01G total</b> |           |                                               | <b>0</b>  | <b>1</b>    | <b>0</b>    | <b>0</b>  | <b>0</b>   | <b>0</b>  | <b>3</b>   | <b>4</b>     |                                                      |          |          |           |          |          |          |          |                   |

| Supplemental Table 9: HLA-B Allele Summary <sup>a</sup> |                        |           | Allele Count by Population Group <sup>b</sup> |            |             |             |           |             |            |            |             | 3.0.0 CIWD Category by Population Group <sup>c</sup> |           |           |           |           |          |          |          |                   |
|---------------------------------------------------------|------------------------|-----------|-----------------------------------------------|------------|-------------|-------------|-----------|-------------|------------|------------|-------------|------------------------------------------------------|-----------|-----------|-----------|-----------|----------|----------|----------|-------------------|
| Allele                                                  | Genomic typing         | Allele ID | G group                                       | AFA        | API         | EURO        | MENA      | HIS         | NAM        | UNK        | Total       | AFA                                                  | API       | EURO      | MENA      | HIS       | NAM      | UNK      | Total    | Highest Frequency |
| B*15:28                                                 | 15:28                  | HLA00191  | 15:28:01G                                     | 0          | 1           | 0           | 0         | 0           | 0          | 3          | 4           |                                                      |           |           |           |           |          |          |          |                   |
| B*15:29                                                 | 15:29                  | HLA00192  |                                               | 4          | 1036        | 472         | 279       | 22          | 3          | 191        | 2007        |                                                      | C         | I         | C         | I         |          | C        | C        | C                 |
| <b>B*15:30 total</b>                                    | <b>15:30 total</b>     |           |                                               | <b>29</b>  | <b>26</b>   | <b>138</b>  | <b>5</b>  | <b>2408</b> | <b>118</b> | <b>311</b> | <b>3035</b> | <b>WD</b>                                            | <b>I</b>  | <b>I</b>  | <b>WD</b> | <b>C</b>  | <b>C</b> | <b>C</b> | <b>C</b> | <b>C</b>          |
| <b>B*15:30:01G total</b>                                | <b>15:30:01G total</b> |           |                                               | <b>29</b>  | <b>26</b>   | <b>138</b>  | <b>5</b>  | <b>2408</b> | <b>118</b> | <b>311</b> | <b>3035</b> | <b>WD</b>                                            | <b>I</b>  | <b>I</b>  | <b>WD</b> | <b>C</b>  | <b>C</b> | <b>C</b> | <b>C</b> | <b>C</b>          |
| B*15:30                                                 | 15:30                  |           | 15:30:01G                                     | 29         | 26          | 138         | 5         | 2408        | 118        | 311        | 3035        | WD                                                   | I         | I         | WD        | C         | C        | C        | C        | C                 |
| B*15:31                                                 | 15:31                  | HLA00194  |                                               | 180        | 2           | 94          | 61        | 52          | 5          | 59         | 453         | C                                                    |           | WD        | C         | I         | WD       | I        | I        | C                 |
| <b>B*15:32 total</b>                                    | <b>15:32 total</b>     |           |                                               | <b>1</b>   | <b>1364</b> | <b>47</b>   | <b>20</b> | <b>6</b>    | <b>1</b>   | <b>52</b>  | <b>1491</b> |                                                      | <b>C</b>  | <b>WD</b> | <b>WD</b> | <b>WD</b> |          | <b>I</b> | <b>I</b> | <b>C</b>          |
| B*15:32                                                 | 15:32                  |           |                                               | 0          | 308         | 13          | 2         | 1           | 0          | 19         | 343         |                                                      | C         | WD        |           |           |          | I        | I        | C                 |
| B*15:32:01                                              | 15:32:01               | HLA00195  |                                               | 1          | 1056        | 34          | 18        | 5           | 1          | 33         | 1148        |                                                      | C         | WD        | WD        | WD        |          | I        | I        | C                 |
| B*15:33                                                 | 15:33                  | HLA00196  |                                               | 2          | 0           | 598         | 1         | 21          | 7          | 37         | 666         |                                                      |           | I         |           | I         | C        | I        | I        | C                 |
| B*15:34                                                 | 15:34                  | HLA00197  |                                               | 0          | 79          | 1089        | 10        | 8           | 2          | 50         | 1238        |                                                      | I         | I         | WD        | I         |          | I        | I        | I                 |
| B*15:35                                                 | 15:35                  | HLA00198  |                                               | 3          | 4310        | 239         | 15        | 94          | 9          | 1369       | 6039        |                                                      | C         | I         | WD        | C         | C        | C        | C        | C                 |
| B*15:36                                                 | 15:36                  | HLA00199  |                                               | 0          | 0           | 0           | 0         | 0           | 0          | 1          | 1           |                                                      |           |           |           |           |          |          |          |                   |
| B*15:37                                                 | 15:37                  | HLA00200  |                                               | 277        | 1           | 29          | 6         | 34          | 5          | 76         | 428         | C                                                    |           | WD        | WD        | I         | WD       | I        | I        | C                 |
| <b>B*15:38 total</b>                                    | <b>15:38 total</b>     |           |                                               | <b>1</b>   | <b>205</b>  | <b>10</b>   | <b>1</b>  | <b>16</b>   | <b>1</b>   | <b>18</b>  | <b>252</b>  |                                                      | <b>C</b>  | <b>WD</b> |           | <b>I</b>  |          | <b>I</b> | <b>I</b> | <b>C</b>          |
| B*15:38                                                 | 15:38                  |           |                                               | 0          | 17          | 1           | 0         | 5           | 0          | 1          | 24          |                                                      | I         |           |           | WD        |          |          | WD       | I                 |
| B*15:38:01                                              | 15:38:01               | HLA00201  |                                               | 1          | 188         | 9           | 1         | 11          | 1          | 17         | 228         |                                                      | C         | WD        |           | I         |          | I        | I        | C                 |
| <b>B*15:39 total</b>                                    | <b>15:39 total</b>     |           |                                               | <b>8</b>   | <b>19</b>   | <b>1401</b> | <b>14</b> | <b>657</b>  | <b>34</b>  | <b>231</b> | <b>2364</b> | <b>WD</b>                                            | <b>I</b>  | <b>C</b>  | <b>WD</b> | <b>C</b>  | <b>C</b> | <b>C</b> | <b>C</b> | <b>C</b>          |
| B*15:39                                                 | 15:39                  |           |                                               | 0          | 0           | 104         | 4         | 67          | 3          | 17         | 195         |                                                      |           | WD        |           | I         |          | I        | I        | I                 |
| B*15:39P                                                | 15:39P                 |           |                                               | 0          | 0           | 2           | 0         | 0           | 0          | 0          | 2           |                                                      |           |           |           |           |          |          |          |                   |
| B*15:39:01                                              | 15:39:01               | HLA00202  |                                               | 8          | 19          | 1287        | 10        | 590         | 31         | 213        | 2158        | WD                                                   | I         | C         | WD        | C         | C        | C        | C        | C                 |
| B*15:39:02                                              | 15:39:02               | HLA05472  |                                               | 0          | 0           | 8           | 0         | 0           | 0          | 1          | 9           |                                                      |           | WD        |           |           |          |          | WD       | WD                |
| <b>B*15:40 total</b>                                    | <b>15:40 total</b>     |           |                                               | <b>21</b>  | <b>5</b>    | <b>21</b>   | <b>0</b>  | <b>278</b>  | <b>77</b>  | <b>50</b>  | <b>452</b>  | <b>WD</b>                                            | <b>WD</b> | <b>WD</b> |           | <b>C</b>  | <b>C</b> | <b>I</b> | <b>I</b> | <b>C</b>          |
| B*15:40                                                 | 15:40                  |           |                                               | 19         | 5           | 20          | 0         | 228         | 69         | 45         | 386         | WD                                                   | WD        | WD        |           | C         | C        | I        | I        | C                 |
| B*15:40:01                                              | 15:40:01               | HLA00203  |                                               | 2          | 0           | 1           | 0         | 50          | 8          | 5          | 66          |                                                      |           |           |           | I         | C        | WD       | WD       | C                 |
| B*15:42                                                 | 15:42                  | HLA00205  |                                               | 0          | 0           | 7           | 0         | 0           | 0          | 0          | 7           |                                                      |           | WD        |           |           |          |          | WD       | WD                |
| B*15:43                                                 | 15:43                  | HLA00206  |                                               | 0          | 0           | 2           | 0         | 0           | 0          | 0          | 2           |                                                      |           |           |           |           |          |          |          |                   |
| B*15:44                                                 | 15:44                  | HLA00207  |                                               | 0          | 18          | 1           | 0         | 1           | 0          | 8          | 28          |                                                      | I         |           |           |           |          | WD       | WD       | I                 |
| B*15:45                                                 | 15:45                  | HLA00208  |                                               | 1          | 0           | 149         | 1         | 2           | 0          | 22         | 175         |                                                      |           | I         |           |           |          | I        | I        | I                 |
| B*15:46                                                 | 15:46                  | HLA00209  |                                               | 0          | 34          | 4           | 1         | 0           | 0          | 4          | 43          |                                                      | I         |           |           |           |          |          | WD       | I                 |
| <b>B*15:47 total</b>                                    | <b>15:47 total</b>     |           |                                               | <b>123</b> | <b>1</b>    | <b>13</b>   | <b>10</b> | <b>34</b>   | <b>10</b>  | <b>37</b>  | <b>228</b>  | <b>C</b>                                             |           | <b>WD</b> | <b>WD</b> | <b>I</b>  | <b>C</b> | <b>I</b> | <b>I</b> | <b>C</b>          |



| Supplemental Table 9: HLA-B Allele Summary <sup>a</sup> |                    |           | Allele Count by Population Group <sup>b</sup> |          |           |          |          |          |          |          |           | 3.0.0 CIWD Category by Population Group <sup>c</sup> |          |      |      |     |     |     |           |                   |
|---------------------------------------------------------|--------------------|-----------|-----------------------------------------------|----------|-----------|----------|----------|----------|----------|----------|-----------|------------------------------------------------------|----------|------|------|-----|-----|-----|-----------|-------------------|
| Allele                                                  | Genomic typing     | Allele ID | G group                                       | AFA      | API       | EURO     | MENA     | HIS      | NAM      | UNK      | Total     | AFA                                                  | API      | EURO | MENA | HIS | NAM | UNK | Total     | Highest Frequency |
| B*15:47                                                 | 15:47              |           |                                               | 27       | 0         | 3        | 0        | 8        | 2        | 1        | 41        | WD                                                   |          |      |      | I   |     |     | WD        | I                 |
| B*15:47:01                                              | 15:47:01           | HLA00210  |                                               | 95       | 1         | 10       | 10       | 26       | 8        | 36       | 186       | C                                                    |          | WD   | WD   | I   | C   | I   | I         | C                 |
| B*15:47:02                                              | 15:47:02           | HLA07652  |                                               | 1        | 0         | 0        | 0        | 0        | 0        | 0        | 1         |                                                      |          |      |      |     |     |     |           |                   |
| B*15:48                                                 | 15:48              | HLA00211  |                                               | 1        | 3         | 6        | 0        | 142      | 10       | 12       | 174       |                                                      |          | WD   |      | C   | C   | WD  | I         | C                 |
| B*15:50                                                 | 15:50              | HLA00979  |                                               | 0        | 1         | 1        | 0        | 0        | 0        | 1        | 3         |                                                      |          |      |      |     |     |     |           |                   |
| B*15:51                                                 | 15:51              | HLA00980  |                                               | 0        | 0         | 3        | 0        | 0        | 0        | 0        | 3         |                                                      |          |      |      |     |     |     |           |                   |
| B*15:52                                                 | 15:52              | HLA01053  |                                               | 66       | 0         | 1        | 0        | 4        | 0        | 14       | 85        | C                                                    |          |      |      |     |     | I   | WD        | C                 |
| B*15:53                                                 | 15:53              | HLA01054  |                                               | 4        | 1         | 4        | 0        | 0        | 2        | 2        | 13        |                                                      |          |      |      |     |     |     | WD        | WD                |
| B*15:54                                                 | 15:54              | HLA01103  |                                               | 57       | 0         | 2        | 2        | 1        | 0        | 8        | 70        | C                                                    |          |      |      |     |     | WD  | WD        | C                 |
| B*15:55                                                 | 15:55              | HLA01113  |                                               | 3        | 0         | 4        | 18       | 13       | 0        | 4        | 42        |                                                      |          |      | WD   | I   |     |     | WD        | I                 |
| B*15:56                                                 | 15:56              | HLA01114  |                                               | 0        | 12        | 0        | 0        | 0        | 2        | 1        | 15        |                                                      | WD       |      |      |     |     |     | WD        | WD                |
| B*15:57                                                 | 15:57              | HLA01117  |                                               | 0        | 0         | 6        | 0        | 0        | 0        | 1        | 7         |                                                      |          | WD   |      |     |     |     | WD        | WD                |
| B*15:58                                                 | 15:58              | HLA01118  |                                               | 0        | 74        | 1        | 2        | 0        | 0        | 9        | 86        |                                                      | I        |      |      |     |     | WD  | WD        | I                 |
| B*15:61                                                 | 15:61              | HLA01250  |                                               | 1        | 0         | 0        | 0        | 0        | 0        | 0        | 1         |                                                      |          |      |      |     |     |     |           |                   |
| B*15:62                                                 | 15:62              | HLA01271  |                                               | 8        | 0         | 0        | 0        | 0        | 0        | 0        | 8         | WD                                                   |          |      |      |     |     |     | WD        | WD                |
| B*15:63                                                 | 15:63              | HLA01284  |                                               | 0        | 0         | 17       | 2        | 19       | 11       | 19       | 68        |                                                      |          | WD   |      | I   | C   | I   | WD        | C                 |
| <b>B*15:64 total</b>                                    | <b>15:64 total</b> |           |                                               | <b>1</b> | <b>23</b> | <b>4</b> | <b>2</b> | <b>0</b> | <b>0</b> | <b>1</b> | <b>31</b> |                                                      | <b>I</b> |      |      |     |     |     | <b>WD</b> | <b>I</b>          |
| B*15:64                                                 | 15:64              |           |                                               | 0        | 3         | 2        | 0        | 0        | 0        | 0        | 5         |                                                      |          |      |      |     |     |     | WD        | WD                |
| B*15:64:01                                              | 15:64:01           | HLA01285  |                                               | 0        | 20        | 2        | 0        | 0        | 0        | 0        | 22        |                                                      | I        |      |      |     |     |     | WD        | I                 |
| B*15:64:02                                              | 15:64:02           | HLA08373  |                                               | 1        | 0         | 0        | 2        | 0        | 0        | 1        | 4         |                                                      |          |      |      |     |     |     |           |                   |
| B*15:65                                                 | 15:65              | HLA01426  |                                               | 0        | 1         | 50       | 0        | 5        | 0        | 11       | 67        |                                                      |          | WD   |      | WD  |     | WD  | WD        | WD                |
| B*15:66                                                 | 15:66              | HLA01440  |                                               | 0        | 2         | 0        | 0        | 0        | 0        | 0        | 2         |                                                      |          |      |      |     |     |     |           |                   |
| B*15:67                                                 | 15:67              | HLA01448  |                                               | 29       | 0         | 4        | 6        | 1        | 0        | 5        | 45        | WD                                                   |          |      | WD   |     |     | WD  | WD        | WD                |
| B*15:68                                                 | 15:68              | HLA01479  |                                               | 0        | 3         | 0        | 0        | 0        | 0        | 1        | 4         |                                                      |          |      |      |     |     |     |           |                   |
| B*15:69                                                 | 15:69              | HLA01494  |                                               | 0        | 0         | 2        | 0        | 0        | 0        | 8        | 10        |                                                      |          |      |      |     |     | WD  | WD        | WD                |
| B*15:70                                                 | 15:70              | HLA01536  |                                               | 0        | 0         | 7        | 0        | 5        | 0        | 4        | 16        |                                                      |          | WD   |      | WD  |     |     | WD        | WD                |
| B*15:71                                                 | 15:71              | HLA01561  |                                               | 2        | 2         | 336      | 25       | 6        | 0        | 15       | 386       |                                                      |          | I    | WD   | WD  |     | I   | I         | I                 |
| B*15:72                                                 | 15:72              | HLA01567  |                                               | 0        | 8         | 0        | 0        | 0        | 0        | 1        | 9         |                                                      | WD       |      |      |     |     |     | WD        | WD                |
| B*15:73                                                 | 15:73              | HLA01611  |                                               | 0        | 2         | 178      | 29       | 2        | 0        | 22       | 233       |                                                      |          | I    | WD   |     |     | I   | I         | I                 |
| B*15:75                                                 | 15:75              | HLA01690  |                                               | 1        | 198       | 0        | 10       | 0        | 3        | 3        | 215       |                                                      | C        |      | WD   |     |     |     | I         | C                 |
| B*15:76                                                 | 15:76              | HLA01698  |                                               | 0        | 0         | 6        | 0        | 0        | 0        | 1        | 7         |                                                      |          | WD   |      |     |     |     | WD        | WD                |

| Supplemental Table 9: HLA-B Allele Summary <sup>a</sup> |                         |           | Allele Count by Population Group <sup>b</sup> |          |          |           |           |          |          |          |           | 3.0.0 CIWD Category by Population Group <sup>c</sup> |     |           |           |     |     |     |           |                   |
|---------------------------------------------------------|-------------------------|-----------|-----------------------------------------------|----------|----------|-----------|-----------|----------|----------|----------|-----------|------------------------------------------------------|-----|-----------|-----------|-----|-----|-----|-----------|-------------------|
| Allele                                                  | Genomic typing          | Allele ID | G group                                       | AFA      | API      | EURO      | MENA      | HIS      | NAM      | UNK      | Total     | AFA                                                  | API | EURO      | MENA      | HIS | NAM | UNK | Total     | Highest Frequency |
| <b>B*15:78 total</b>                                    | <b>15:78 total</b>      |           |                                               | <b>1</b> | <b>3</b> | <b>76</b> | <b>0</b>  | <b>0</b> | <b>0</b> | <b>4</b> | <b>84</b> |                                                      |     | <b>WD</b> |           |     |     |     | <b>WD</b> | <b>WD</b>         |
| B*15:78                                                 | 15:78                   |           |                                               | 0        | 0        | 4         | 0         | 0        | 0        | 0        | 4         |                                                      |     |           |           |     |     |     |           |                   |
| B*15:78:01                                              | 15:78:01                | HLA01751  |                                               | 1        | 1        | 71        | 0         | 0        | 0        | 4        | 77        |                                                      |     | WD        |           |     |     |     | WD        | WD                |
| B*15:78:02                                              | 15:78:02                | HLA03961  |                                               | 0        | 2        | 1         | 0         | 0        | 0        | 0        | 3         |                                                      |     |           |           |     |     |     |           |                   |
| B*15:79N                                                | 15:79N                  | HLA01767  |                                               | 0        | 0        | 39        | 0         | 0        | 0        | 1        | 40        |                                                      |     | WD        |           |     |     |     | WD        | WD                |
| B*15:80                                                 | 15:80                   | HLA01768  |                                               | 0        | 1        | 3         | 0         | 0        | 0        | 1        | 5         |                                                      |     |           |           |     |     |     | WD        | WD                |
| B*15:82                                                 | 15:82                   | HLA01801  |                                               | 2        | 2        | 417       | 1         | 2        | 0        | 16       | 440       |                                                      |     | I         |           |     |     | I   | I         | I                 |
| B*15:83                                                 | 15:83                   | HLA01845  |                                               | 5        | 0        | 0         | 1         | 0        | 1        | 1        | 8         | WD                                                   |     |           |           |     |     |     | WD        | WD                |
| B*15:85                                                 | 15:85                   | HLA01911  |                                               | 0        | 0        | 0         | 0         | 1        | 0        | 0        | 1         |                                                      |     |           |           |     |     |     |           |                   |
| B*15:86                                                 | 15:86                   | HLA01912  |                                               | 0        | 2        | 0         | 0         | 0        | 0        | 0        | 2         |                                                      |     |           |           |     |     |     |           |                   |
| B*15:87                                                 | 15:87                   | HLA01913  |                                               | 0        | 0        | 4         | 1         | 0        | 0        | 0        | 5         |                                                      |     |           |           |     |     |     | WD        | WD                |
| B*15:88                                                 | 15:88                   | HLA01915  |                                               | 0        | 11       | 1         | 0         | 0        | 0        | 1        | 13        | WD                                                   |     |           |           |     |     |     | WD        | WD                |
| B*15:89                                                 | 15:89                   | HLA01916  |                                               | 0        | 10       | 0         | 0         | 0        | 0        | 0        | 10        | WD                                                   |     |           |           |     |     |     | WD        | WD                |
| B*15:95                                                 | 15:95                   | HLA02032  |                                               | 3        | 0        | 0         | 0         | 0        | 0        | 0        | 3         |                                                      |     |           |           |     |     |     |           |                   |
| B*15:96                                                 | 15:96                   | HLA02035  |                                               | 0        | 0        | 8         | 0         | 0        | 0        | 0        | 8         |                                                      |     | WD        |           |     |     |     | WD        | WD                |
| B*15:97                                                 | 15:97                   | HLA02099  |                                               | 0        | 0        | 4         | 0         | 0        | 0        | 0        | 4         |                                                      |     |           |           |     |     |     |           |                   |
| B*15:98                                                 | 15:98                   | HLA02113  |                                               | 0        | 0        | 5         | 1         | 0        | 0        | 0        | 6         |                                                      |     | WD        |           |     |     |     | WD        | WD                |
| B*15:99                                                 | 15:99                   | HLA02119  |                                               | 1        | 0        | 0         | 0         | 0        | 0        | 1        | 2         |                                                      |     |           |           |     |     |     |           |                   |
| B*15:106                                                | 15:106                  | HLA02332  |                                               | 0        | 5        | 0         | 0         | 0        | 0        | 0        | 5         | WD                                                   |     |           |           |     |     |     | WD        | WD                |
| B*15:107                                                | 15:107                  | HLA02368  |                                               | 1        | 0        | 0         | 0         | 0        | 0        | 0        | 1         |                                                      |     |           |           |     |     |     |           |                   |
| B*15:108                                                | 15:108                  | HLA02376  |                                               | 0        | 0        | 13        | 0         | 6        | 0        | 0        | 19        |                                                      |     | WD        |           | WD  |     |     | WD        | WD                |
| B*15:109                                                | 15:109                  | HLA02387  |                                               | 0        | 2        | 1         | 0         | 0        | 0        | 1        | 4         |                                                      |     |           |           |     |     |     |           |                   |
| B*15:110                                                | 15:110                  | HLA02421  |                                               | 2        | 1        | 0         | 0         | 13       | 3        | 1        | 20        |                                                      |     |           |           | I   |     |     | WD        | I                 |
| B*15:113                                                | 15:113                  | HLA02483  |                                               | 0        | 94       | 1         | 2         | 0        | 0        | 1        | 98        | I                                                    |     |           |           |     |     |     | WD        | I                 |
| B*15:117                                                | 15:117                  | HLA02618  |                                               | 0        | 0        | 18        | 0         | 0        | 0        | 2        | 20        |                                                      |     | WD        |           |     |     |     | WD        | WD                |
| B*15:120                                                | 15:120                  | HLA02665  |                                               | 0        | 0        | 0         | 0         | 0        | 0        | 1        | 1         |                                                      |     |           |           |     |     |     |           |                   |
| B*15:122                                                | 15:122                  | HLA02759  |                                               | 0        | 0        | 44        | 0         | 0        | 0        | 0        | 44        |                                                      |     | WD        |           |     |     |     | WD        | WD                |
| <b>B*15:123 total</b>                                   | <b>15:123 total</b>     |           |                                               | <b>2</b> | <b>0</b> | <b>3</b>  | <b>16</b> | <b>3</b> | <b>0</b> | <b>0</b> | <b>24</b> |                                                      |     |           | <b>WD</b> |     |     |     | <b>WD</b> | <b>WD</b>         |
| <b>B*15:123:01G total</b>                               | <b>15:123:01G total</b> |           |                                               | <b>2</b> | <b>0</b> | <b>3</b>  | <b>16</b> | <b>3</b> | <b>0</b> | <b>0</b> | <b>24</b> |                                                      |     |           | <b>WD</b> |     |     |     | <b>WD</b> | <b>WD</b>         |
| B*15:123:01G                                            | 15:123:01G              |           | 15:123:01G                                    | 2        | 0        | 3         | 16        | 2        | 0        | 0        | 23        |                                                      |     |           | WD        |     |     |     | WD        | WD                |
| B*15:151                                                | 15:151                  | HLA03470  | 15:123:01G                                    | 0        | 0        | 0         | 0         | 1        | 0        | 0        | 1         |                                                      |     |           |           |     |     |     |           |                   |

| Supplemental Table 9: HLA-B Allele Summary <sup>a</sup> |                |           | Allele Count by Population Group <sup>b</sup> |     |     |      |      |     |     |     |       | 3.0.0 CIWD Category by Population Group <sup>c</sup> |     |      |      |     |     |     |       |                   |
|---------------------------------------------------------|----------------|-----------|-----------------------------------------------|-----|-----|------|------|-----|-----|-----|-------|------------------------------------------------------|-----|------|------|-----|-----|-----|-------|-------------------|
| Allele                                                  | Genomic typing | Allele ID | G group                                       | AFA | API | EURO | MENA | HIS | NAM | UNK | Total | AFA                                                  | API | EURO | MENA | HIS | NAM | UNK | Total | Highest Frequency |
| B*15:125                                                | 15:125         | HLA02781  |                                               | 0   | 0   | 328  | 0    | 0   | 0   | 3   | 331   |                                                      |     | I    |      |     |     |     | I     | I                 |
| B*15:128                                                | 15:128         | HLA02875  |                                               | 0   | 0   | 6    | 0    | 0   | 0   | 0   | 6     |                                                      |     | WD   |      |     |     |     | WD    | WD                |
| B*15:131                                                | 15:131         | HLA02974  |                                               | 0   | 0   | 2    | 0    | 0   | 0   | 0   | 2     |                                                      |     |      |      |     |     |     |       |                   |
| B*15:132                                                | 15:132         | HLA02976  |                                               | 1   | 1   | 79   | 1    | 1   | 1   | 11  | 95    |                                                      |     | WD   |      |     |     | WD  | WD    | WD                |
| B*15:133                                                | 15:133         | HLA03019  |                                               | 0   | 2   | 0    | 0    | 0   | 0   | 0   | 2     |                                                      |     |      |      |     |     |     |       |                   |
| B*15:135                                                | 15:135         | HLA03080  |                                               | 0   | 1   | 150  | 1    | 0   | 1   | 7   | 160   |                                                      |     | I    |      |     |     | WD  | WD    | I                 |
| B*15:141                                                | 15:141         | HLA03217  |                                               | 0   | 43  | 3    | 0    | 0   | 1   | 18  | 65    | I                                                    |     |      |      |     |     | I   | WD    | I                 |
| B*15:142                                                | 15:142         | HLA03244  |                                               | 0   | 0   | 37   | 0    | 0   | 0   | 0   | 37    |                                                      |     | WD   |      |     |     |     | WD    | WD                |
| B*15:145                                                | 15:145         | HLA03281  |                                               | 0   | 0   | 2    | 0    | 0   | 0   | 0   | 2     |                                                      |     |      |      |     |     |     |       |                   |
| B*15:147                                                | 15:147         | HLA03319  |                                               | 0   | 0   | 12   | 0    | 0   | 0   | 6   | 18    |                                                      |     | WD   |      |     |     | WD  | WD    | WD                |
| B*15:150                                                | 15:150         | HLA03441  |                                               | 0   | 0   | 1    | 0    | 15  | 1   | 2   | 19    |                                                      |     |      |      | I   |     |     | WD    | I                 |
| B*15:153                                                | 15:153         | HLA03606  |                                               | 0   | 0   | 99   | 0    | 1   | 0   | 8   | 108   |                                                      |     | WD   |      |     |     | WD  | WD    | WD                |
| B*15:154                                                | 15:154         | HLA03614  |                                               | 0   | 0   | 24   | 0    | 0   | 0   | 2   | 26    |                                                      |     | WD   |      |     |     |     | WD    | WD                |
| B*15:155                                                | 15:155         | HLA03615  |                                               | 0   | 0   | 0    | 0    | 1   | 0   | 1   | 2     |                                                      |     |      |      |     |     |     |       |                   |
| B*15:156                                                | 15:156         | HLA03620  |                                               | 1   | 0   | 0    | 0    | 0   | 0   | 2   | 3     |                                                      |     |      |      |     |     |     |       |                   |
| B*15:157                                                | 15:157         | HLA03646  |                                               | 0   | 0   | 43   | 0    | 0   | 0   | 1   | 44    |                                                      |     | WD   |      |     |     |     | WD    | WD                |
| B*15:158                                                | 15:158         | HLA03693  |                                               | 6   | 0   | 0    | 0    | 0   | 0   | 2   | 8     | WD                                                   |     |      |      |     |     |     | WD    | WD                |
| B*15:159                                                | 15:159         | HLA03708  |                                               | 0   | 9   | 0    | 0    | 0   | 0   | 1   | 10    |                                                      | WD  |      |      |     |     |     | WD    | WD                |
| B*15:160                                                | 15:160         | HLA03711  |                                               | 0   | 0   | 22   | 0    | 0   | 0   | 0   | 22    |                                                      |     | WD   |      |     |     |     | WD    | WD                |
| B*15:161                                                | 15:161         | HLA03804  |                                               | 0   | 0   | 1    | 1    | 0   | 0   | 1   | 3     |                                                      |     |      |      |     |     |     |       |                   |
| B*15:162                                                | 15:162         | HLA03951  |                                               | 0   | 0   | 0    | 8    | 0   | 0   | 53  | 61    |                                                      |     |      | WD   |     |     | I   | WD    | I                 |
| B*15:163                                                | 15:163         | HLA03947  |                                               | 0   | 0   | 0    | 1    | 0   | 0   | 0   | 1     |                                                      |     |      |      |     |     |     |       |                   |
| B*15:164                                                | 15:164         | HLA03949  |                                               | 0   | 0   | 28   | 0    | 0   | 0   | 0   | 28    |                                                      |     | WD   |      |     |     |     | WD    | WD                |
| B*15:167                                                | 15:167         | HLA04084  |                                               | 0   | 0   | 8    | 0    | 0   | 0   | 0   | 8     |                                                      |     | WD   |      |     |     |     | WD    | WD                |
| B*15:170                                                | 15:170         | HLA04028  |                                               | 0   | 13  | 0    | 0    | 0   | 0   | 0   | 13    | I                                                    |     |      |      |     |     |     | WD    | I                 |
| B*15:171                                                | 15:171         | HLA04169  |                                               | 0   | 0   | 4    | 0    | 0   | 0   | 0   | 4     |                                                      |     |      |      |     |     |     |       |                   |
| B*15:172                                                | 15:172         | HLA04171  |                                               | 0   | 0   | 7    | 0    | 0   | 0   | 0   | 7     |                                                      |     | WD   |      |     |     |     | WD    | WD                |
| B*15:173                                                | 15:173         | HLA04187  |                                               | 0   | 0   | 63   | 1    | 0   | 0   | 1   | 65    |                                                      |     | WD   |      |     |     |     | WD    | WD                |
| B*15:174                                                | 15:174         | HLA04213  |                                               | 0   | 0   | 5    | 1    | 0   | 0   | 0   | 6     |                                                      |     | WD   |      |     |     |     | WD    | WD                |
| B*15:175                                                | 15:175         | HLA04218  |                                               | 0   | 0   | 4    | 3    | 0   | 0   | 0   | 7     |                                                      |     |      |      |     |     |     | WD    | WD                |
| B*15:176                                                | 15:176         | HLA04232  |                                               | 0   | 0   | 1    | 0    | 0   | 0   | 0   | 1     |                                                      |     |      |      |     |     |     |       |                   |

| Supplemental Table 9: HLA-B Allele Summary <sup>a</sup> |                     |           | Allele Count by Population Group <sup>b</sup> |          |          |          |          |          |          |          |          | 3.0.0 CIWD Category by Population Group <sup>c</sup> |     |      |      |     |     |     |       |                   |
|---------------------------------------------------------|---------------------|-----------|-----------------------------------------------|----------|----------|----------|----------|----------|----------|----------|----------|------------------------------------------------------|-----|------|------|-----|-----|-----|-------|-------------------|
| Allele                                                  | Genomic typing      | Allele ID | G group                                       | AFA      | API      | EURO     | MENA     | HIS      | NAM      | UNK      | Total    | AFA                                                  | API | EURO | MENA | HIS | NAM | UNK | Total | Highest Frequency |
| B*15:178                                                | 15:178              | HLA04158  |                                               | 0        | 1        | 1        | 1        | 0        | 0        | 0        | 3        |                                                      |     |      |      |     |     |     |       |                   |
| B*15:180                                                | 15:180              | HLA04165  |                                               | 0        | 0        | 1        | 0        | 0        | 0        | 0        | 1        |                                                      |     |      |      |     |     |     |       |                   |
| B*15:181N                                               | 15:181N             | HLA04457  |                                               | 0        | 0        | 8        | 0        | 0        | 0        | 0        | 8        |                                                      |     | WD   |      |     |     |     | WD    | WD                |
| B*15:183                                                | 15:183              | HLA04508  |                                               | 0        | 0        | 6        | 0        | 0        | 0        | 0        | 6        |                                                      |     | WD   |      |     |     |     | WD    | WD                |
| B*15:184                                                | 15:184              | HLA04533  |                                               | 1        | 0        | 2        | 0        | 0        | 0        | 1        | 4        |                                                      |     |      |      |     |     |     |       |                   |
| B*15:185                                                | 15:185              | HLA04413  |                                               | 0        | 2        | 0        | 0        | 0        | 0        | 0        | 2        |                                                      |     |      |      |     |     |     |       |                   |
| B*15:190N                                               | 15:190N             | HLA04770  |                                               | 0        | 0        | 5        | 0        | 0        | 0        | 0        | 5        |                                                      |     | WD   |      |     |     |     | WD    | WD                |
| B*15:192                                                | 15:192              | HLA05135  |                                               | 0        | 1        | 0        | 0        | 0        | 0        | 0        | 1        |                                                      |     |      |      |     |     |     |       |                   |
| B*15:194                                                | 15:194              | HLA05259  |                                               | 0        | 1        | 0        | 0        | 0        | 0        | 0        | 1        |                                                      |     |      |      |     |     |     |       |                   |
| B*15:204                                                | 15:204              | HLA05479  |                                               | 0        | 7        | 0        | 0        | 0        | 0        | 0        | 7        |                                                      | WD  |      |      |     |     |     | WD    | WD                |
| B*15:206                                                | 15:206              | HLA05500  |                                               | 0        | 0        | 4        | 0        | 0        | 0        | 0        | 4        |                                                      |     |      |      |     |     |     |       |                   |
| B*15:207                                                | 15:207              | HLA05509  |                                               | 0        | 0        | 5        | 0        | 0        | 0        | 0        | 5        |                                                      |     | WD   |      |     |     |     | WD    | WD                |
| B*15:208                                                | 15:208              | HLA05516  |                                               | 0        | 0        | 9        | 0        | 0        | 0        | 1        | 10       |                                                      |     | WD   |      |     |     |     | WD    | WD                |
| B*15:210                                                | 15:210              | HLA05953  |                                               | 1        | 0        | 0        | 0        | 0        | 0        | 0        | 1        |                                                      |     |      |      |     |     |     |       |                   |
| B*15:211                                                | 15:211              | HLA05957  |                                               | 0        | 0        | 8        | 0        | 0        | 0        | 4        | 12       |                                                      |     | WD   |      |     |     |     | WD    | WD                |
| B*15:212                                                | 15:212              | HLA06030  |                                               | 0        | 0        | 1        | 0        | 0        | 0        | 0        | 1        |                                                      |     |      |      |     |     |     |       |                   |
| B*15:217                                                | 15:217              | HLA06222  |                                               | 0        | 0        | 0        | 0        | 1        | 0        | 1        | 2        |                                                      |     |      |      |     |     |     |       |                   |
| B*15:218Q                                               | 15:218Q             | HLA06248  |                                               | 0        | 0        | 1        | 0        | 0        | 0        | 0        | 1        |                                                      |     |      |      |     |     |     |       |                   |
| B*15:222                                                | 15:222              | HLA06366  |                                               | 1        | 0        | 0        | 0        | 0        | 0        | 2        | 3        |                                                      |     |      |      |     |     |     |       |                   |
| B*15:229                                                | 15:229              | HLA06921  |                                               | 0        | 0        | 0        | 1        | 0        | 0        | 0        | 1        |                                                      |     |      |      |     |     |     |       |                   |
| B*15:232                                                | 15:232              | HLA06948  |                                               | 0        | 0        | 2        | 0        | 0        | 0        | 0        | 2        |                                                      |     |      |      |     |     |     |       |                   |
| B*15:233                                                | 15:233              | HLA06988  |                                               | 0        | 0        | 1        | 0        | 0        | 0        | 0        | 1        |                                                      |     |      |      |     |     |     |       |                   |
| B*15:235                                                | 15:235              | HLA07093  |                                               | 1        | 0        | 0        | 0        | 0        | 0        | 0        | 1        |                                                      |     |      |      |     |     |     |       |                   |
| B*15:236                                                | 15:236              | HLA07179  |                                               | 0        | 0        | 1        | 0        | 0        | 0        | 0        | 1        |                                                      |     |      |      |     |     |     |       |                   |
| B*15:237                                                | 15:237              | HLA07385  |                                               | 0        | 1        | 7        | 0        | 0        | 0        | 0        | 8        |                                                      |     | WD   |      |     |     |     | WD    | WD                |
| B*15:238                                                | 15:238              | HLA07412  |                                               | 0        | 0        | 1        | 1        | 0        | 0        | 0        | 2        |                                                      |     |      |      |     |     |     |       |                   |
| B*15:239                                                | 15:239              | HLA07453  |                                               | 0        | 0        | 9        | 0        | 1        | 0        | 0        | 10       |                                                      |     | WD   |      |     |     |     | WD    | WD                |
| B*15:240                                                | 15:240              | HLA07649  |                                               | 0        | 42       | 0        | 1        | 0        | 1        | 1        | 45       |                                                      | I   |      |      |     |     |     | WD    | I                 |
| <b>B*15:242 total</b>                                   | <b>15:242 total</b> |           |                                               | <b>1</b> | <b>0</b> | <b>0</b> | <b>0</b> | <b>0</b> | <b>0</b> | <b>0</b> | <b>1</b> |                                                      |     |      |      |     |     |     |       |                   |
| B*15:242                                                | 15:242              |           |                                               | 1        | 0        | 0        | 0        | 0        | 0        | 0        | 1        |                                                      |     |      |      |     |     |     |       |                   |
| B*15:248                                                | 15:248              | HLA08068  |                                               | 0        | 0        | 7        | 0        | 0        | 0        | 0        | 7        |                                                      |     | WD   |      |     |     |     | WD    | WD                |

| Supplemental Table 9: HLA-B Allele Summary <sup>a</sup> |                     |           | Allele Count by Population Group <sup>b</sup> |          |          |          |          |          |          |          |          | 3.0.0 CIWD Category by Population Group <sup>c</sup> |     |      |      |     |     |     |       |                   |
|---------------------------------------------------------|---------------------|-----------|-----------------------------------------------|----------|----------|----------|----------|----------|----------|----------|----------|------------------------------------------------------|-----|------|------|-----|-----|-----|-------|-------------------|
| Allele                                                  | Genomic typing      | Allele ID | G group                                       | AFA      | API      | EURO     | MENA     | HIS      | NAM      | UNK      | Total    | AFA                                                  | API | EURO | MENA | HIS | NAM | UNK | Total | Highest Frequency |
| B*15:251                                                | 15:251              | HLA08072  |                                               | 0        | 0        | 2        | 0        | 0        | 0        | 0        | 2        |                                                      |     |      |      |     |     |     |       |                   |
| B*15:252                                                | 15:252              | HLA08074  |                                               | 0        | 0        | 2        | 0        | 0        | 0        | 0        | 2        |                                                      |     |      |      |     |     |     |       |                   |
| B*15:254                                                | 15:254              | HLA08144  |                                               | 2        | 0        | 0        | 0        | 0        | 0        | 1        | 3        |                                                      |     |      |      |     |     |     |       |                   |
| B*15:256                                                | 15:256              | HLA08368  |                                               | 0        | 0        | 1        | 0        | 0        | 0        | 0        | 1        |                                                      |     |      |      |     |     |     |       |                   |
| B*15:264                                                | 15:264              | HLA08783  |                                               | 0        | 0        | 1        | 0        | 0        | 0        | 0        | 1        |                                                      |     |      |      |     |     |     |       |                   |
| B*15:266                                                | 15:266              | HLA09000  |                                               | 4        | 0        | 0        | 0        | 0        | 0        | 0        | 4        |                                                      |     |      |      |     |     |     |       |                   |
| B*15:272N                                               | 15:272N             | HLA09437  |                                               | 0        | 0        | 1        | 0        | 0        | 0        | 0        | 1        |                                                      |     |      |      |     |     |     |       |                   |
| <b>B*15:275 total</b>                                   | <b>15:275 total</b> |           |                                               | <b>0</b> | <b>1</b> | <b>0</b> | <b>0</b> | <b>0</b> | <b>0</b> | <b>0</b> | <b>1</b> |                                                      |     |      |      |     |     |     |       |                   |
| B*15:275                                                | 15:275              |           |                                               | 0        | 1        | 0        | 0        | 0        | 0        | 0        | 1        |                                                      |     |      |      |     |     |     |       |                   |
| B*15:276                                                | 15:276              | HLA09517  |                                               | 0        | 0        | 0        | 0        | 0        | 0        | 1        | 1        |                                                      |     |      |      |     |     |     |       |                   |
| B*15:277                                                | 15:277              | HLA09573  |                                               | 0        | 2        | 0        | 0        | 0        | 0        | 0        | 2        |                                                      |     |      |      |     |     |     |       |                   |
| B*15:278                                                | 15:278              | HLA09574  |                                               | 0        | 2        | 0        | 0        | 0        | 0        | 0        | 2        |                                                      |     |      |      |     |     |     |       |                   |
| B*15:279                                                | 15:279              | HLA09576  |                                               | 0        | 0        | 0        | 0        | 0        | 0        | 2        | 2        |                                                      |     |      |      |     |     |     |       |                   |
| B*15:280                                                | 15:280              | HLA09578  |                                               | 0        | 0        | 1        | 0        | 0        | 0        | 0        | 1        |                                                      |     |      |      |     |     |     |       |                   |
| B*15:282                                                | 15:282              | HLA09708  |                                               | 1        | 0        | 0        | 0        | 0        | 0        | 0        | 1        |                                                      |     |      |      |     |     |     |       |                   |
| B*15:285                                                | 15:285              | HLA10032  |                                               | 0        | 3        | 0        | 0        | 0        | 0        | 0        | 3        |                                                      |     |      |      |     |     |     |       |                   |
| B*15:287                                                | 15:287              | HLA10035  |                                               | 0        | 0        | 2        | 0        | 0        | 0        | 0        | 2        |                                                      |     |      |      |     |     |     |       |                   |
| B*15:288                                                | 15:288              | HLA10036  |                                               | 0        | 0        | 1        | 0        | 0        | 0        | 0        | 1        |                                                      |     |      |      |     |     |     |       |                   |
| B*15:290                                                | 15:290              | HLA10042  |                                               | 0        | 20       | 0        | 0        | 0        | 0        | 0        | 20       |                                                      | I   |      |      |     |     |     | WD    | I                 |
| B*15:293                                                | 15:293              | HLA10415  |                                               | 0        | 0        | 0        | 0        | 1        | 0        | 0        | 1        |                                                      |     |      |      |     |     |     |       |                   |
| B*15:309                                                | 15:309              | HLA11024  |                                               | 0        | 0        | 3        | 0        | 0        | 0        | 0        | 3        |                                                      |     |      |      |     |     |     |       |                   |
| B*15:310                                                | 15:310              | HLA11026  |                                               | 0        | 0        | 0        | 0        | 1        | 0        | 0        | 1        |                                                      |     |      |      |     |     |     |       |                   |
| B*15:312                                                | 15:312              | HLA11029  |                                               | 2        | 0        | 0        | 0        | 0        | 0        | 0        | 2        |                                                      |     |      |      |     |     |     |       |                   |
| B*15:313                                                | 15:313              | HLA11244  |                                               | 1        | 0        | 0        | 0        | 0        | 0        | 0        | 1        |                                                      |     |      |      |     |     |     |       |                   |
| B*15:315                                                | 15:315              | HLA11324  |                                               | 0        | 0        | 2        | 0        | 0        | 0        | 0        | 2        |                                                      |     |      |      |     |     |     |       |                   |
| B*15:317                                                | 15:317              | HLA11428  |                                               | 0        | 0        | 1        | 0        | 0        | 0        | 0        | 1        |                                                      |     |      |      |     |     |     |       |                   |
| B*15:319                                                | 15:319              | HLA11483  |                                               | 0        | 6        | 0        | 0        | 0        | 0        | 0        | 6        |                                                      | WD  |      |      |     |     |     | WD    | WD                |
| B*15:323                                                | 15:323              | HLA11660  |                                               | 1        | 0        | 0        | 0        | 0        | 0        | 0        | 1        |                                                      |     |      |      |     |     |     |       |                   |
| B*15:324                                                | 15:324              | HLA11728  |                                               | 0        | 0        | 3        | 0        | 1        | 0        | 0        | 4        |                                                      |     |      |      |     |     |     |       |                   |
| B*15:325                                                | 15:325              | HLA11774  |                                               | 0        | 1        | 0        | 0        | 0        | 0        | 0        | 1        |                                                      |     |      |      |     |     |     |       |                   |
| B*15:328                                                | 15:328              | HLA12132  |                                               | 0        | 1        | 0        | 0        | 0        | 0        | 0        | 1        |                                                      |     |      |      |     |     |     |       |                   |

| Supplemental Table 9: HLA-B Allele Summary <sup>a</sup> |                     |           | Allele Count by Population Group <sup>b</sup> |          |          |          |          |          |          |          |          | 3.0.0 CIWD Category by Population Group <sup>c</sup> |     |      |      |     |     |     |       |                   |
|---------------------------------------------------------|---------------------|-----------|-----------------------------------------------|----------|----------|----------|----------|----------|----------|----------|----------|------------------------------------------------------|-----|------|------|-----|-----|-----|-------|-------------------|
| Allele                                                  | Genomic typing      | Allele ID | G group                                       | AFA      | API      | EURO     | MENA     | HIS      | NAM      | UNK      | Total    | AFA                                                  | API | EURO | MENA | HIS | NAM | UNK | Total | Highest Frequency |
| B*15:329                                                | 15:329              | HLA12133  |                                               | 0        | 1        | 0        | 0        | 0        | 0        | 0        | 1        |                                                      |     |      |      |     |     |     |       |                   |
| B*15:330                                                | 15:330              | HLA12285  |                                               | 0        | 1        | 0        | 0        | 0        | 0        | 0        | 1        |                                                      |     |      |      |     |     |     |       |                   |
| B*15:331                                                | 15:331              | HLA12289  |                                               | 0        | 1        | 0        | 0        | 0        | 0        | 0        | 1        |                                                      |     |      |      |     |     |     |       |                   |
| B*15:332                                                | 15:332              | HLA12290  |                                               | 0        | 2        | 0        | 0        | 0        | 0        | 0        | 2        |                                                      |     |      |      |     |     |     |       |                   |
| B*15:335                                                | 15:335              | HLA12299  |                                               | 0        | 11       | 0        | 0        | 0        | 0        | 0        | 11       | WD                                                   |     |      |      |     |     |     | WD    | WD                |
| B*15:337                                                | 15:337              | HLA12483  |                                               | 0        | 1        | 0        | 0        | 0        | 0        | 0        | 1        |                                                      |     |      |      |     |     |     |       |                   |
| B*15:341                                                | 15:341              | HLA12753  |                                               | 0        | 1        | 0        | 0        | 0        | 0        | 0        | 1        |                                                      |     |      |      |     |     |     |       |                   |
| B*15:342                                                | 15:342              | HLA12754  |                                               | 0        | 2        | 0        | 0        | 0        | 0        | 0        | 2        |                                                      |     |      |      |     |     |     |       |                   |
| B*15:343                                                | 15:343              | HLA12755  |                                               | 0        | 1        | 0        | 0        | 0        | 0        | 0        | 1        |                                                      |     |      |      |     |     |     |       |                   |
| B*15:345                                                | 15:345              | HLA12989  |                                               | 0        | 1        | 0        | 0        | 0        | 0        | 0        | 1        |                                                      |     |      |      |     |     |     |       |                   |
| B*15:346                                                | 15:346              | HLA13003  |                                               | 0        | 0        | 1        | 0        | 0        | 0        | 0        | 1        |                                                      |     |      |      |     |     |     |       |                   |
| B*15:347                                                | 15:347              | HLA13007  |                                               | 0        | 1        | 0        | 0        | 0        | 0        | 0        | 1        |                                                      |     |      |      |     |     |     |       |                   |
| B*15:357                                                | 15:357              | HLA13479  |                                               | 0        | 1        | 0        | 0        | 0        | 0        | 0        | 1        |                                                      |     |      |      |     |     |     |       |                   |
| B*15:360                                                | 15:360              | HLA13534  |                                               | 0        | 1        | 0        | 0        | 0        | 0        | 0        | 1        |                                                      |     |      |      |     |     |     |       |                   |
| B*15:361                                                | 15:361              | HLA13535  |                                               | 0        | 1        | 0        | 0        | 0        | 0        | 0        | 1        |                                                      |     |      |      |     |     |     |       |                   |
| B*15:362                                                | 15:362              | HLA13548  |                                               | 0        | 0        | 0        | 0        | 0        | 0        | 1        | 1        |                                                      |     |      |      |     |     |     |       |                   |
| <b>B*15:363 total</b>                                   | <b>15:363 total</b> |           |                                               | <b>0</b> | <b>0</b> | <b>0</b> | <b>0</b> | <b>0</b> | <b>0</b> | <b>1</b> | <b>1</b> |                                                      |     |      |      |     |     |     |       |                   |
| B*15:363:02                                             | 15:363:02           | HLA15635  |                                               | 0        | 0        | 0        | 0        | 0        | 0        | 1        | 1        |                                                      |     |      |      |     |     |     |       |                   |
| B*15:364                                                | 15:364              | HLA13857  |                                               | 0        | 2        | 0        | 0        | 0        | 0        | 0        | 2        |                                                      |     |      |      |     |     |     |       |                   |
| B*15:366                                                | 15:366              | HLA13859  |                                               | 0        | 2        | 0        | 0        | 0        | 0        | 1        | 3        |                                                      |     |      |      |     |     |     |       |                   |
| B*15:369                                                | 15:369              | HLA14015  |                                               | 0        | 0        | 0        | 0        | 1        | 0        | 0        | 1        |                                                      |     |      |      |     |     |     |       |                   |
| B*15:376                                                | 15:376              | HLA14309  |                                               | 0        | 2        | 0        | 0        | 0        | 0        | 0        | 2        |                                                      |     |      |      |     |     |     |       |                   |
| B*15:377Q                                               | 15:377Q             | HLA14221  |                                               | 0        | 0        | 3        | 0        | 0        | 0        | 0        | 3        |                                                      |     |      |      |     |     |     |       |                   |
| B*15:378                                                | 15:378              | HLA14442  |                                               | 0        | 1        | 0        | 0        | 0        | 0        | 0        | 1        |                                                      |     |      |      |     |     |     |       |                   |
| B*15:387                                                | 15:387              | HLA14936  |                                               | 0        | 1        | 0        | 0        | 0        | 0        | 0        | 1        |                                                      |     |      |      |     |     |     |       |                   |
| B*15:390                                                | 15:390              | HLA14974  |                                               | 0        | 0        | 1        | 0        | 0        | 0        | 0        | 1        |                                                      |     |      |      |     |     |     |       |                   |
| B*15:391                                                | 15:391              | HLA14975  |                                               | 0        | 0        | 1        | 0        | 0        | 0        | 0        | 1        |                                                      |     |      |      |     |     |     |       |                   |
| B*15:392                                                | 15:392              | HLA14976  |                                               | 0        | 0        | 3        | 0        | 0        | 0        | 1        | 4        |                                                      |     |      |      |     |     |     |       |                   |
| B*15:395                                                | 15:395              | HLA15277  |                                               | 0        | 1        | 0        | 0        | 0        | 0        | 0        | 1        |                                                      |     |      |      |     |     |     |       |                   |
| B*15:406                                                | 15:406              | HLA16221  |                                               | 0        | 0        | 1        | 0        | 0        | 0        | 0        | 1        |                                                      |     |      |      |     |     |     |       |                   |
| B*15:417                                                | 15:417              | HLA16391  |                                               | 0        | 0        | 0        | 0        | 0        | 0        | 1        | 1        |                                                      |     |      |      |     |     |     |       |                   |

| Supplemental Table 9: HLA-B Allele Summary <sup>a</sup> |                        |           | Allele Count by Population Group <sup>b</sup> |              |              |               |              |              |             |              |               | 3.0.0 CIWD Category by Population Group <sup>c</sup> |          |          |          |          |          |          |          |                   |
|---------------------------------------------------------|------------------------|-----------|-----------------------------------------------|--------------|--------------|---------------|--------------|--------------|-------------|--------------|---------------|------------------------------------------------------|----------|----------|----------|----------|----------|----------|----------|-------------------|
| Allele                                                  | Genomic typing         | Allele ID | G group                                       | AFA          | API          | EURO          | MENA         | HIS          | NAM         | UNK          | Total         | AFA                                                  | API      | EURO     | MENA     | HIS      | NAM      | UNK      | Total    | Highest Frequency |
| B*15:434                                                | 15:434                 | HLA17757  |                                               | 0            | 0            | 0             | 0            | 0            | 0           | 1            | 1             |                                                      |          |          |          |          |          |          |          |                   |
| B*15:CODE                                               | 15:CODE                |           |                                               | 2717         | 2587         | 76228         | 529          | 3722         | 357         | 5669         | 91809         | NA                                                   | NA       | NA       | NA       | NA       | NA       | NA       | NA       | NA                |
| <b>B*18:01 total</b>                                    | <b>18:01 total</b>     |           |                                               | <b>11163</b> | <b>24982</b> | <b>592773</b> | <b>21083</b> | <b>25357</b> | <b>1977</b> | <b>53551</b> | <b>730886</b> | <b>C</b>                                             | <b>C</b> | <b>C</b> | <b>C</b> | <b>C</b> | <b>C</b> | <b>C</b> | <b>C</b> | <b>C</b>          |
| B*18:01                                                 | 18:01                  |           |                                               | 3            | 1            | 4682          | 15           | 10           | 2           | 196          | 4909          |                                                      |          | C        | WD       | I        |          | C        | C        | C                 |
| B*18:01P                                                | 18:01P                 |           |                                               | 1            | 1            | 1234          | 3            | 3            | 0           | 8            | 1250          |                                                      |          | C        |          |          |          | WD       | I        | C                 |
| <b>B*18:01:01G total</b>                                | <b>18:01:01G total</b> |           |                                               | <b>11145</b> | <b>24907</b> | <b>586651</b> | <b>21062</b> | <b>25331</b> | <b>1974</b> | <b>53310</b> | <b>724380</b> | <b>C</b>                                             | <b>C</b> | <b>C</b> | <b>C</b> | <b>C</b> | <b>C</b> | <b>C</b> | <b>C</b> | <b>C</b>          |
| B*18:01:01G                                             | 18:01:01G              |           | 18:01:01G                                     | 9236         | 23467        | 564771        | 20538        | 19362        | 1505        | 50040        | 688919        | C                                                    | C        | C        | C        | C        | C        | C        | C        | C                 |
| B*18:01:01                                              | 18:01:01               |           | 18:01:01G                                     | 608          | 768          | 11062         | 232          | 2246         | 168         | 1379         | 16463         | C                                                    | C        | C        | C        | C        | C        | C        | C        | C                 |
| B*18:01:01:01                                           | 18:01:01:01            | HLA00213  | 18:01:01G                                     | 941          | 27           | 4049          | 28           | 2122         | 167         | 846          | 8180          | C                                                    | I        | C        | WD       | C        | C        | C        | C        | C                 |
| B*18:01:01:02                                           | 18:01:01:02            | HLA07768  | 18:01:01G                                     | 259          | 644          | 6712          | 264          | 1537         | 125         | 1008         | 10549         | C                                                    | C        | C        | C        | C        | C        | C        | C        | C                 |
| B*18:01:01:03                                           | 18:01:01:03            | HLA14812  | 18:01:01G                                     | 101          | 1            | 21            | 0            | 46           | 7           | 33           | 209           | C                                                    |          | WD       |          | I        | C        | I        | I        | C                 |
| B*18:01:01:04                                           | 18:01:01:04            | HLA14962  | 18:01:01G                                     | 0            | 0            | 1             | 0            | 4            | 0           | 0            | 5             |                                                      |          |          |          |          |          |          | WD       | WD                |
| B*18:01:01:05                                           | 18:01:01:05            | HLA16275  | 18:01:01G                                     | 0            | 0            | 31            | 0            | 0            | 0           | 0            | 31            |                                                      |          | WD       |          |          |          |          | WD       | WD                |
| B*18:01:01:06                                           | 18:01:01:06            | HLA16637  | 18:01:01G                                     | 0            | 0            | 1             | 0            | 0            | 0           | 0            | 1             |                                                      |          |          |          |          |          |          |          |                   |
| B*18:01:03                                              | 18:01:03               | HLA02650  | 18:01:01G                                     | 0            | 0            | 0             | 0            | 14           | 2           | 3            | 19            |                                                      |          |          |          | I        |          |          | WD       | I                 |
| B*18:01:25                                              | 18:01:25               | HLA16857  | 18:01:01G                                     | 0            | 0            | 1             | 0            | 0            | 0           | 0            | 1             |                                                      |          |          |          |          |          |          |          |                   |
| <b>B*18:131 total</b>                                   | <b>18:131 total</b>    |           |                                               | <b>0</b>     | <b>0</b>     | <b>2</b>      | <b>0</b>     | <b>0</b>     | <b>0</b>    | <b>1</b>     | <b>3</b>      |                                                      |          |          |          |          |          |          |          |                   |
| B*18:131                                                | 18:131                 |           | 18:01:01G                                     | 0            | 0            | 2             | 0            | 0            | 0           | 1            | 3             |                                                      |          |          |          |          |          |          |          |                   |
| B*18:01:02                                              | 18:01:02               | HLA01565  |                                               | 10           | 0            | 161           | 0            | 13           | 1           | 24           | 209           | WD                                                   |          | I        |          | I        |          | I        | I        | I                 |
| B*18:01:05                                              | 18:01:05               | HLA04249  |                                               | 0            | 0            | 12            | 0            | 0            | 0           | 0            | 12            |                                                      |          | WD       |          |          |          |          | WD       | WD                |
| B*18:01:06                                              | 18:01:06               | HLA04432  |                                               | 0            | 72           | 3             | 0            | 0            | 0           | 0            | 75            |                                                      | I        |          |          |          |          |          | WD       | I                 |
| B*18:01:07                                              | 18:01:07               | HLA04453  |                                               | 0            | 0            | 1             | 0            | 0            | 0           | 0            | 1             |                                                      |          |          |          |          |          |          |          |                   |
| B*18:01:08                                              | 18:01:08               | HLA04566  |                                               | 0            | 0            | 4             | 0            | 0            | 0           | 9            | 13            |                                                      |          |          |          |          |          | WD       | WD       | WD                |
| B*18:01:09                                              | 18:01:09               | HLA05483  |                                               | 0            | 0            | 8             | 0            | 0            | 0           | 0            | 8             |                                                      |          | WD       |          |          |          |          | WD       | WD                |
| B*18:01:10                                              | 18:01:10               | HLA06233  |                                               | 4            | 0            | 5             | 0            | 0            | 0           | 3            | 12            |                                                      |          | WD       |          |          |          |          | WD       | WD                |
| B*18:01:11                                              | 18:01:11               | HLA06234  |                                               | 0            | 1            | 1             | 0            | 0            | 0           | 0            | 2             |                                                      |          |          |          |          |          |          |          |                   |
| B*18:01:12                                              | 18:01:12               | HLA06354  |                                               | 0            | 0            | 8             | 0            | 0            | 0           | 0            | 8             |                                                      |          | WD       |          |          |          |          | WD       | WD                |
| B*18:01:13                                              | 18:01:13               | HLA06358  |                                               | 0            | 0            | 0             | 0            | 0            | 0           | 1            | 1             |                                                      |          |          |          |          |          |          |          |                   |
| B*18:01:16                                              | 18:01:16               | HLA07691  |                                               | 0            | 0            | 0             | 3            | 0            | 0           | 0            | 3             |                                                      |          |          |          |          |          |          |          |                   |
| B*18:01:20                                              | 18:01:20               | HLA11231  |                                               | 0            | 0            | 2             | 0            | 0            | 0           | 0            | 2             |                                                      |          |          |          |          |          |          |          |                   |
| B*18:01:23                                              | 18:01:23               | HLA12983  |                                               | 0            | 0            | 1             | 0            | 0            | 0           | 0            | 1             |                                                      |          |          |          |          |          |          |          |                   |

| Supplemental Table 9: HLA-B Allele Summary <sup>a</sup> |                        |           | Allele Count by Population Group <sup>b</sup> |           |           |             |           |            |           |            |             | 3.0.0 CIWD Category by Population Group <sup>c</sup> |          |           |           |          |          |           |           |                   |
|---------------------------------------------------------|------------------------|-----------|-----------------------------------------------|-----------|-----------|-------------|-----------|------------|-----------|------------|-------------|------------------------------------------------------|----------|-----------|-----------|----------|----------|-----------|-----------|-------------------|
| Allele                                                  | Genomic typing         | Allele ID | G group                                       | AFA       | API       | EURO        | MENA      | HIS        | NAM       | UNK        | Total       | AFA                                                  | API      | EURO      | MENA      | HIS      | NAM      | UNK       | Total     | Highest Frequency |
| B*18:02                                                 | 18:02                  | HLA00214  |                                               | 2         | 1466      | 75          | 24        | 2          | 1         | 199        | 1769        |                                                      | C        | WD        | WD        |          |          | C         | C         | C                 |
| B*18:03                                                 | 18:03                  | HLA00215  |                                               | 123       | 35        | 13495       | 182       | 231        | 29        | 464        | 14559       | C                                                    | I        | C         | C         | C        | C        | C         | C         | C                 |
| <b>B*18:04 total</b>                                    | <b>18:04 total</b>     |           |                                               | <b>17</b> | <b>2</b>  | <b>620</b>  | <b>6</b>  | <b>133</b> | <b>19</b> | <b>87</b>  | <b>884</b>  | <b>WD</b>                                            |          | <b>I</b>  | <b>WD</b> | <b>C</b> | <b>C</b> | <b>I</b>  | <b>I</b>  | <b>C</b>          |
| B*18:04                                                 | 18:04                  |           |                                               | 17        | 2         | 584         | 6         | 133        | 19        | 83         | 844         | WD                                                   |          | I         | WD        | C        | C        | I         | I         | C                 |
| B*18:04:01                                              | 18:04:01               | HLA00216  |                                               | 0         | 0         | 36          | 0         | 0          | 0         | 4          | 40          |                                                      |          | WD        |           |          |          |           | WD        | WD                |
| <b>B*18:05 total</b>                                    | <b>18:05 total</b>     |           |                                               | <b>7</b>  | <b>19</b> | <b>1787</b> | <b>76</b> | <b>135</b> | <b>9</b>  | <b>191</b> | <b>2224</b> | <b>WD</b>                                            | <b>I</b> | <b>C</b>  | <b>C</b>  | <b>C</b> | <b>C</b> | <b>C</b>  | <b>C</b>  | <b>C</b>          |
| <b>B*18:05:01G total</b>                                | <b>18:05:01G total</b> |           |                                               | <b>7</b>  | <b>19</b> | <b>1787</b> | <b>76</b> | <b>135</b> | <b>9</b>  | <b>191</b> | <b>2224</b> | <b>WD</b>                                            | <b>I</b> | <b>C</b>  | <b>C</b>  | <b>C</b> | <b>C</b> | <b>C</b>  | <b>C</b>  | <b>C</b>          |
| B*18:05                                                 | 18:05                  |           | 18:05:01G                                     | 7         | 19        | 1787        | 76        | 135        | 9         | 191        | 2224        | WD                                                   | I        | C         | C         | C        | C        | C         | C         | C                 |
| B*18:06                                                 | 18:06                  | HLA00218  |                                               | 1         | 1         | 28          | 15        | 24         | 2         | 8          | 79          |                                                      |          | WD        | WD        | I        |          | WD        | WD        | I                 |
| <b>B*18:07 total</b>                                    | <b>18:07 total</b>     |           |                                               | <b>0</b>  | <b>2</b>  | <b>244</b>  | <b>23</b> | <b>4</b>   | <b>0</b>  | <b>12</b>  | <b>285</b>  |                                                      |          | <b>I</b>  | <b>WD</b> |          |          | <b>WD</b> | <b>I</b>  | <b>I</b>          |
| B*18:07                                                 | 18:07                  |           |                                               | 0         | 1         | 33          | 4         | 0          | 0         | 2          | 40          |                                                      |          | WD        |           |          |          |           | WD        | WD                |
| B*18:07:01                                              | 18:07:01               | HLA00219  |                                               | 0         | 1         | 193         | 19        | 4          | 0         | 10         | 227         |                                                      |          | I         | WD        |          |          | WD        | I         | I                 |
| B*18:07:02                                              | 18:07:02               | HLA04075  |                                               | 0         | 0         | 18          | 0         | 0          | 0         | 0          | 18          |                                                      |          | WD        |           |          |          |           | WD        | WD                |
| B*18:08                                                 | 18:08                  | HLA01055  |                                               | 0         | 0         | 31          | 0         | 0          | 0         | 5          | 36          |                                                      |          | WD        |           |          |          | WD        | WD        | WD                |
| B*18:09                                                 | 18:09                  | HLA01131  |                                               | 0         | 0         | 46          | 0         | 0          | 0         | 0          | 46          |                                                      |          | WD        |           |          |          |           | WD        | WD                |
| B*18:10                                                 | 18:10                  | HLA01177  |                                               | 0         | 0         | 4           | 1         | 0          | 0         | 1          | 6           |                                                      |          |           |           |          |          |           | WD        | WD                |
| B*18:11                                                 | 18:11                  | HLA01270  |                                               | 0         | 0         | 33          | 3         | 2          | 0         | 8          | 46          |                                                      |          | WD        |           |          |          | WD        | WD        | WD                |
| <b>B*18:12 total</b>                                    | <b>18:12 total</b>     |           |                                               | <b>0</b>  | <b>0</b>  | <b>51</b>   | <b>0</b>  | <b>0</b>   | <b>0</b>  | <b>5</b>   | <b>56</b>   |                                                      |          | <b>WD</b> |           |          |          | <b>WD</b> | <b>WD</b> | <b>WD</b>         |
| B*18:12                                                 | 18:12                  |           |                                               | 0         | 0         | 41          | 0         | 0          | 0         | 4          | 45          |                                                      |          | WD        |           |          |          |           | WD        | WD                |
| B*18:12:01                                              | 18:12:01               | HLA01281  |                                               | 0         | 0         | 10          | 0         | 0          | 0         | 1          | 11          |                                                      |          | WD        |           |          |          |           | WD        | WD                |
| B*18:13                                                 | 18:13                  | HLA01353  |                                               | 0         | 0         | 56          | 0         | 0          | 0         | 15         | 71          |                                                      |          | WD        |           |          |          | I         | WD        | I                 |
| B*18:14                                                 | 18:14                  | HLA01506  |                                               | 1         | 1         | 219         | 1         | 6          | 0         | 8          | 236         |                                                      |          | I         |           | WD       |          | WD        | I         | I                 |
| B*18:15                                                 | 18:15                  | HLA01508  |                                               | 0         | 1         | 5           | 2         | 2          | 0         | 8          | 18          |                                                      |          | WD        |           |          |          | WD        | WD        | WD                |
| <b>B*18:18 total</b>                                    | <b>18:18 total</b>     |           |                                               | <b>0</b>  | <b>0</b>  | <b>473</b>  | <b>4</b>  | <b>3</b>   | <b>0</b>  | <b>14</b>  | <b>494</b>  |                                                      |          | <b>I</b>  |           |          |          | <b>I</b>  | <b>I</b>  | <b>I</b>          |
| <b>B*18:18:01G total</b>                                | <b>18:18:01G total</b> |           |                                               | <b>0</b>  | <b>0</b>  | <b>473</b>  | <b>4</b>  | <b>3</b>   | <b>0</b>  | <b>14</b>  | <b>494</b>  |                                                      |          | <b>I</b>  |           |          |          | <b>I</b>  | <b>I</b>  | <b>I</b>          |
| B*18:18                                                 | 18:18                  |           | 18:18:01G                                     | 0         | 0         | 473         | 4         | 3          | 0         | 14         | 494         |                                                      |          | I         |           |          |          | I         | I         | I                 |
| B*18:19                                                 | 18:19                  | HLA01782  |                                               | 0         | 0         | 7           | 8         | 0          | 0         | 1          | 16          |                                                      |          | WD        | WD        |          |          |           | WD        | WD                |
| B*18:20                                                 | 18:20                  | HLA01914  |                                               | 0         | 0         | 66          | 0         | 5          | 0         | 6          | 77          |                                                      |          | WD        |           | WD       |          | WD        | WD        | WD                |
| B*18:22                                                 | 18:22                  | HLA02388  |                                               | 0         | 5         | 0           | 0         | 0          | 0         | 0          | 5           |                                                      | WD       |           |           |          |          |           | WD        | WD                |
| B*18:25                                                 | 18:25                  | HLA02783  |                                               | 46        | 19        | 8           | 0         | 2          | 0         | 15         | 90          | C                                                    | I        | WD        |           |          |          | I         | WD        | C                 |
| B*18:26                                                 | 18:26                  | HLA02851  |                                               | 2         | 0         | 1           | 1         | 0          | 0         | 0          | 4           |                                                      |          |           |           |          |          |           |           |                   |



| Supplemental Table 9: HLA-B Allele Summary <sup>a</sup> |                    |           | Allele Count by Population Group <sup>b</sup> |          |          |           |          |          |          |          |           | 3.0.0 CIWD Category by Population Group <sup>c</sup> |     |           |      |     |     |     |           |                   |
|---------------------------------------------------------|--------------------|-----------|-----------------------------------------------|----------|----------|-----------|----------|----------|----------|----------|-----------|------------------------------------------------------|-----|-----------|------|-----|-----|-----|-----------|-------------------|
| Allele                                                  | Genomic typing     | Allele ID | G group                                       | AFA      | API      | EURO      | MENA     | HIS      | NAM      | UNK      | Total     | AFA                                                  | API | EURO      | MENA | HIS | NAM | UNK | Total     | Highest Frequency |
| B*18:27                                                 | 18:27              | HLA02995  |                                               | 0        | 0        | 3         | 0        | 0        | 0        | 0        | 3         |                                                      |     |           |      |     |     |     |           |                   |
| B*18:28                                                 | 18:28              | HLA03180  |                                               | 0        | 0        | 74        | 0        | 0        | 0        | 1        | 75        |                                                      |     | WD        |      |     |     |     | WD        | WD                |
| B*18:30                                                 | 18:30              | HLA03462  |                                               | 0        | 0        | 8         | 0        | 0        | 1        | 1        | 10        |                                                      |     | WD        |      |     |     |     | WD        | WD                |
| B*18:31                                                 | 18:31              | HLA03463  |                                               | 0        | 0        | 4         | 0        | 0        | 0        | 0        | 4         |                                                      |     |           |      |     |     |     |           |                   |
| B*18:32                                                 | 18:32              | HLA03510  |                                               | 0        | 0        | 4         | 0        | 1        | 0        | 0        | 5         |                                                      |     |           |      |     |     |     | WD        | WD                |
| B*18:33                                                 | 18:33              | HLA03612  |                                               | 0        | 0        | 60        | 3        | 0        | 0        | 0        | 63        |                                                      |     | WD        |      |     |     |     | WD        | WD                |
| B*18:34                                                 | 18:34              | HLA03717  |                                               | 0        | 0        | 51        | 0        | 0        | 0        | 2        | 53        |                                                      |     | WD        |      |     |     |     | WD        | WD                |
| B*18:35                                                 | 18:35              | HLA03946  |                                               | 0        | 0        | 0         | 0        | 0        | 0        | 1        | 1         |                                                      |     |           |      |     |     |     |           |                   |
| B*18:36                                                 | 18:36              | HLA03956  |                                               | 0        | 0        | 5         | 0        | 0        | 0        | 0        | 5         |                                                      |     | WD        |      |     |     |     | WD        | WD                |
| <b>B*18:37 total</b>                                    | <b>18:37 total</b> |           |                                               | <b>0</b> | <b>0</b> | <b>3</b>  | <b>3</b> | <b>0</b> | <b>0</b> | <b>0</b> | <b>6</b>  |                                                      |     |           |      |     |     |     | <b>WD</b> | <b>WD</b>         |
| B*18:37                                                 | 18:37              |           |                                               | 0        | 0        | 3         | 3        | 0        | 0        | 0        | 6         |                                                      |     |           |      |     |     |     | WD        | WD                |
| B*18:39                                                 | 18:39              | HLA04091  |                                               | 0        | 0        | 3         | 0        | 0        | 0        | 0        | 3         |                                                      |     |           |      |     |     |     |           |                   |
| B*18:40                                                 | 18:40              | HLA04106  |                                               | 1        | 0        | 28        | 1        | 0        | 0        | 3        | 33        |                                                      |     | WD        |      |     |     |     | WD        | WD                |
| B*18:43                                                 | 18:43              | HLA04212  |                                               | 0        | 0        | 8         | 0        | 0        | 0        | 0        | 8         |                                                      |     | WD        |      |     |     |     | WD        | WD                |
| <b>B*18:44 total</b>                                    | <b>18:44 total</b> |           |                                               | <b>0</b> | <b>0</b> | <b>17</b> | <b>1</b> | <b>0</b> | <b>0</b> | <b>0</b> | <b>18</b> |                                                      |     | <b>WD</b> |      |     |     |     | <b>WD</b> | <b>WD</b>         |
| B*18:44                                                 | 18:44              |           |                                               | 0        | 0        | 2         | 0        | 0        | 0        | 0        | 2         |                                                      |     |           |      |     |     |     |           |                   |
| B*18:44:01                                              | 18:44:01           | HLA04222  |                                               | 0        | 0        | 15        | 1        | 0        | 0        | 0        | 16        |                                                      |     | WD        |      |     |     |     | WD        | WD                |
| B*18:45                                                 | 18:45              | HLA04223  |                                               | 0        | 0        | 3         | 1        | 0        | 0        | 0        | 4         |                                                      |     |           |      |     |     |     |           |                   |
| B*18:47                                                 | 18:47              | HLA04510  |                                               | 0        | 0        | 2         | 0        | 0        | 0        | 1        | 3         |                                                      |     |           |      |     |     |     |           |                   |
| B*18:49                                                 | 18:49              | HLA04805  |                                               | 0        | 1        | 6         | 0        | 0        | 0        | 0        | 7         |                                                      |     | WD        |      |     |     |     | WD        | WD                |
| B*18:50                                                 | 18:50              | HLA05125  |                                               | 0        | 3        | 0         | 0        | 0        | 0        | 1        | 4         |                                                      |     |           |      |     |     |     |           |                   |
| B*18:52                                                 | 18:52              | HLA05508  |                                               | 0        | 0        | 1         | 0        | 0        | 0        | 0        | 1         |                                                      |     |           |      |     |     |     |           |                   |
| B*18:54                                                 | 18:54              | HLA06135  |                                               | 0        | 0        | 3         | 0        | 0        | 0        | 1        | 4         |                                                      |     |           |      |     |     |     |           |                   |
| B*18:60                                                 | 18:60              | HLA06322  |                                               | 0        | 0        | 6         | 0        | 0        | 0        | 1        | 7         |                                                      |     | WD        |      |     |     |     | WD        | WD                |
| B*18:63                                                 | 18:63              | HLA06660  |                                               | 0        | 0        | 0         | 1        | 0        | 0        | 0        | 1         |                                                      |     |           |      |     |     |     |           |                   |
| B*18:65                                                 | 18:65              | HLA06927  |                                               | 0        | 0        | 1         | 0        | 0        | 0        | 0        | 1         |                                                      |     |           |      |     |     |     |           |                   |
| B*18:67                                                 | 18:67              | HLA07189  |                                               | 0        | 0        | 2         | 0        | 0        | 0        | 0        | 2         |                                                      |     |           |      |     |     |     |           |                   |
| B*18:68                                                 | 18:68              | HLA07303  |                                               | 8        | 0        | 3         | 0        | 0        | 0        | 2        | 13        | WD                                                   |     |           |      |     |     |     | WD        | WD                |
| B*18:69                                                 | 18:69              | HLA07632  |                                               | 0        | 0        | 0         | 7        | 0        | 0        | 0        | 7         |                                                      |     |           | WD   |     |     |     | WD        | WD                |
| <b>B*18:72 total</b>                                    | <b>18:72 total</b> |           |                                               | <b>0</b> | <b>0</b> | <b>0</b>  | <b>0</b> | <b>2</b> | <b>0</b> | <b>0</b> | <b>2</b>  |                                                      |     |           |      |     |     |     |           |                   |
| B*18:72:02                                              | 18:72:02           | HLA14824  |                                               | 0        | 0        | 0         | 0        | 1        | 0        | 0        | 1         |                                                      |     |           |      |     |     |     |           |                   |

| Supplemental Table 9: HLA-B Allele Summary <sup>a</sup> |                        |           | Allele Count by Population Group <sup>b</sup> |            |            |              |             |             |            |             |               | 3.0.0 CIWD Category by Population Group <sup>c</sup> |          |          |          |          |          |          |          |                   |
|---------------------------------------------------------|------------------------|-----------|-----------------------------------------------|------------|------------|--------------|-------------|-------------|------------|-------------|---------------|------------------------------------------------------|----------|----------|----------|----------|----------|----------|----------|-------------------|
| Allele                                                  | Genomic typing         | Allele ID | G group                                       | AFA        | API        | EURO         | MENA        | HIS         | NAM        | UNK         | Total         | AFA                                                  | API      | EURO     | MENA     | HIS      | NAM      | UNK      | Total    | Highest Frequency |
| B*18:72:03                                              | 18:72:03               | HLA16329  |                                               | 0          | 0          | 0            | 0           | 1           | 0          | 0           | 1             |                                                      |          |          |          |          |          |          |          |                   |
| B*18:73                                                 | 18:73                  | HLA07905  |                                               | 0          | 0          | 3            | 3           | 0           | 0          | 0           | 6             |                                                      |          |          |          |          |          |          | WD       | WD                |
| B*18:75                                                 | 18:75                  | HLA07907  |                                               | 0          | 0          | 1            | 0           | 0           | 0          | 0           | 1             |                                                      |          |          |          |          |          |          |          |                   |
| B*18:76                                                 | 18:76                  | HLA07908  |                                               | 0          | 0          | 1            | 0           | 0           | 0          | 0           | 1             |                                                      |          |          |          |          |          |          |          |                   |
| B*18:79                                                 | 18:79                  | HLA08392  |                                               | 0          | 0          | 0            | 0           | 0           | 0          | 3           | 3             |                                                      |          |          |          |          |          |          |          |                   |
| B*18:82                                                 | 18:82                  | HLA08506  |                                               | 0          | 0          | 1            | 0           | 0           | 0          | 0           | 1             |                                                      |          |          |          |          |          |          |          |                   |
| B*18:85                                                 | 18:85                  | HLA08982  |                                               | 1          | 0          | 0            | 0           | 0           | 0          | 0           | 1             |                                                      |          |          |          |          |          |          |          |                   |
| B*18:87                                                 | 18:87                  | HLA09345  |                                               | 0          | 0          | 1            | 0           | 0           | 0          | 0           | 1             |                                                      |          |          |          |          |          |          |          |                   |
| B*18:91                                                 | 18:91                  | HLA09556  |                                               | 0          | 0          | 1            | 0           | 0           | 0          | 0           | 1             |                                                      |          |          |          |          |          |          |          |                   |
| B*18:92                                                 | 18:92                  | HLA09885  |                                               | 0          | 0          | 2            | 0           | 0           | 0          | 0           | 2             |                                                      |          |          |          |          |          |          |          |                   |
| B*18:93                                                 | 18:93                  | HLA09889  |                                               | 0          | 1          | 0            | 0           | 0           | 0          | 0           | 1             |                                                      |          |          |          |          |          |          |          |                   |
| B*18:94N                                                | 18:94N                 | HLA09890  |                                               | 0          | 0          | 3            | 0           | 0           | 0          | 0           | 3             |                                                      |          |          |          |          |          |          |          |                   |
| B*18:95                                                 | 18:95                  | HLA10403  |                                               | 0          | 0          | 3            | 0           | 0           | 1          | 1           | 5             |                                                      |          |          |          |          |          |          | WD       | WD                |
| B*18:98                                                 | 18:98                  | HLA11007  |                                               | 4          | 0          | 0            | 0           | 0           | 0          | 0           | 4             |                                                      |          |          |          |          |          |          |          |                   |
| B*18:102                                                | 18:102                 | HLA11419  |                                               | 0          | 1          | 0            | 0           | 0           | 0          | 1           | 2             |                                                      |          |          |          |          |          |          |          |                   |
| B*18:104                                                | 18:104                 | HLA11651  |                                               | 0          | 0          | 1            | 0           | 0           | 0          | 0           | 1             |                                                      |          |          |          |          |          |          |          |                   |
| B*18:106                                                | 18:106                 | HLA12661  |                                               | 0          | 0          | 1            | 0           | 0           | 0          | 0           | 1             |                                                      |          |          |          |          |          |          |          |                   |
| B*18:111                                                | 18:111                 | HLA13653  |                                               | 0          | 0          | 1            | 0           | 0           | 0          | 0           | 1             |                                                      |          |          |          |          |          |          |          |                   |
| B*18:113                                                | 18:113                 | HLA13709  |                                               | 0          | 0          | 4            | 0           | 0           | 0          | 0           | 4             |                                                      |          |          |          |          |          |          |          |                   |
| B*18:114                                                | 18:114                 | HLA13794  |                                               | 0          | 6          | 0            | 0           | 0           | 0          | 0           | 6             |                                                      | WD       |          |          |          |          |          | WD       | WD                |
| B*18:116                                                | 18:116                 | HLA13796  |                                               | 0          | 2          | 0            | 0           | 0           | 0          | 0           | 2             |                                                      |          |          |          |          |          |          |          |                   |
| B*18:117                                                | 18:117                 | HLA14434  |                                               | 0          | 0          | 1            | 0           | 0           | 0          | 0           | 1             |                                                      |          |          |          |          |          |          |          |                   |
| B*18:CODE                                               | 18:CODE                |           |                                               | 1075       | 682        | 46618        | 720         | 2940        | 211        | 4819        | 57065         | NA                                                   | NA       | NA       | NA       | NA       | NA       | NA       | NA       | NA                |
| B*27:01                                                 | 27:01                  | HLA00220  |                                               | 0          | 0          | 267          | 0           | 2           | 1          | 10          | 280           |                                                      |          | I        |          |          |          | WD       | I        | I                 |
| <b>B*27:02 total</b>                                    | <b>27:02 total</b>     |           |                                               | <b>193</b> | <b>726</b> | <b>96061</b> | <b>2557</b> | <b>1465</b> | <b>156</b> | <b>4952</b> | <b>106110</b> | <b>C</b>                                             | <b>C</b> | <b>C</b> | <b>C</b> | <b>C</b> | <b>C</b> | <b>C</b> | <b>C</b> | <b>C</b>          |
| B*27:02                                                 | 27:02                  |           |                                               | 19         | 38         | 11373        | 365         | 219         | 24         | 980         | 13018         | WD                                                   | I        | C        | C        | C        | C        | C        | C        | C                 |
| B*27:02P                                                | 27:02P                 |           |                                               | 0          | 0          | 16           | 1           | 0           | 0          | 0           | 17            |                                                      |          | WD       |          |          |          |          | WD       | WD                |
| <b>B*27:02:01G total</b>                                | <b>27:02:01G total</b> |           |                                               | <b>174</b> | <b>688</b> | <b>84671</b> | <b>2191</b> | <b>1246</b> | <b>132</b> | <b>3972</b> | <b>93074</b>  | <b>C</b>                                             | <b>C</b> | <b>C</b> | <b>C</b> | <b>C</b> | <b>C</b> | <b>C</b> | <b>C</b> | <b>C</b>          |
| B*27:02:01G                                             | 27:02:01G              |           | 27:02:01G                                     | 17         | 115        | 11607        | 210         | 62          | 4          | 261         | 12276         | WD                                                   | I        | C        | C        | I        |          | C        | C        | C                 |
| B*27:02:01                                              | 27:02:01               |           | 27:02:01G                                     | 155        | 572        | 72862        | 1981        | 1176        | 128        | 3696        | 80570         | C                                                    | C        | C        | C        | C        | C        | C        | C        | C                 |
| B*27:02:01:01                                           | 27:02:01:01            | HLA00221  | 27:02:01G                                     | 2          | 1          | 201          | 0           | 8           | 0          | 15          | 227           |                                                      |          | I        |          | I        |          | I        | I        | I                 |

| Supplemental Table 9: HLA-B Allele Summary <sup>a</sup> |                        |           | Allele Count by Population Group <sup>b</sup> |             |             |               |             |              |             |              |               | 3.0.0 CIWD Category by Population Group <sup>c</sup> |          |          |          |          |          |          |          |                   |
|---------------------------------------------------------|------------------------|-----------|-----------------------------------------------|-------------|-------------|---------------|-------------|--------------|-------------|--------------|---------------|------------------------------------------------------|----------|----------|----------|----------|----------|----------|----------|-------------------|
| Allele                                                  | Genomic typing         | Allele ID | G group                                       | AFA         | API         | EURO          | MENA        | HIS          | NAM         | UNK          | Total         | AFA                                                  | API      | EURO     | MENA     | HIS      | NAM      | UNK      | Total    | Highest Frequency |
| B*27:02:01:02                                           | 27:02:01:02            | HLA16229  | 27:02:01G                                     | 0           | 0           | 1             | 0           | 0            | 0           | 0            | 1             |                                                      |          |          |          |          |          |          |          |                   |
| B*27:02:02                                              | 27:02:02               | HLA06955  |                                               | 0           | 0           | 1             | 0           | 0            | 0           | 0            | 1             |                                                      |          |          |          |          |          |          |          |                   |
| B*27:03                                                 | 27:03                  | HLA00222  |                                               | 1386        | 29          | 1432          | 410         | 432          | 40          | 507          | 4236          | C                                                    | I        | C        | C        | C        | C        | C        | C        | C                 |
| <b>B*27:04 total</b>                                    | <b>27:04 total</b>     |           |                                               | <b>6</b>    | <b>5768</b> | <b>183</b>    | <b>108</b>  | <b>18</b>    | <b>10</b>   | <b>453</b>   | <b>6546</b>   | <b>WD</b>                                            | <b>C</b> | <b>I</b> | <b>C</b> | <b>I</b> | <b>C</b> | <b>C</b> | <b>C</b> | <b>C</b>          |
| B*27:04                                                 | 27:04                  |           |                                               | 0           | 0           | 9             | 0           | 0            | 0           | 0            | 9             |                                                      |          | WD       |          |          |          |          | WD       | WD                |
| B*27:04P                                                | 27:04P                 |           |                                               | 0           | 0           | 3             | 0           | 0            | 0           | 0            | 3             |                                                      |          |          |          |          |          |          |          |                   |
| <b>B*27:04:01G total</b>                                | <b>27:04:01G total</b> |           |                                               | <b>5</b>    | <b>5743</b> | <b>170</b>    | <b>107</b>  | <b>18</b>    | <b>10</b>   | <b>452</b>   | <b>6505</b>   | <b>WD</b>                                            | <b>C</b> | <b>I</b> | <b>C</b> | <b>I</b> | <b>C</b> | <b>C</b> | <b>C</b> | <b>C</b>          |
| B*27:04:01G                                             | 27:04:01G              |           | 27:04:01G                                     | 4           | 4680        | 159           | 93          | 16           | 8           | 319          | 5279          |                                                      | C        | I        | C        | I        | C        | C        | C        | C                 |
| B*27:04:01                                              | 27:04:01               | HLA00223  | 27:04:01G                                     | 1           | 1063        | 11            | 14          | 2            | 2           | 133          | 1226          |                                                      | C        | WD       | WD       |          |          | C        | I        | C                 |
| B*27:04:03                                              | 27:04:03               | HLA03987  |                                               | 1           | 24          | 1             | 1           | 0            | 0           | 1            | 28            |                                                      | I        |          |          |          |          |          | WD       | I                 |
| B*27:112                                                | 27:112                 | HLA10699  |                                               | 0           | 1           | 0             | 0           | 0            | 0           | 0            | 1             |                                                      |          |          |          |          |          |          |          |                   |
| <b>B*27:05 total</b>                                    | <b>27:05 total</b>     |           |                                               | <b>2726</b> | <b>9086</b> | <b>412750</b> | <b>4256</b> | <b>12367</b> | <b>1554</b> | <b>33072</b> | <b>475811</b> | <b>C</b>                                             | <b>C</b> | <b>C</b> | <b>C</b> | <b>C</b> | <b>C</b> | <b>C</b> | <b>C</b> | <b>C</b>          |
| B*27:05                                                 | 27:05                  |           |                                               | 1           | 1           | 1468          | 0           | 9            | 0           | 48           | 1527          |                                                      |          | C        |          | I        |          | I        | I        | C                 |
| B*27:05P                                                | 27:05P                 |           |                                               | 1           | 0           | 204           | 0           | 1            | 0           | 1            | 207           |                                                      |          | I        |          |          |          |          | I        | I                 |
| <b>B*27:05:02G total</b>                                | <b>27:05:02G total</b> |           |                                               | <b>2722</b> | <b>9066</b> | <b>402809</b> | <b>4243</b> | <b>12331</b> | <b>1554</b> | <b>32735</b> | <b>465460</b> | <b>C</b>                                             | <b>C</b> | <b>C</b> | <b>C</b> | <b>C</b> | <b>C</b> | <b>C</b> | <b>C</b> | <b>C</b>          |
| B*27:05:02G                                             | 27:05:02G              |           | 27:05:02G                                     | 2240        | 8359        | 385618        | 4162        | 9387         | 1229        | 30452        | 441447        | C                                                    | C        | C        | C        | C        | C        | C        | C        | C                 |
| B*27:05:02                                              | 27:05:02               |           | 27:05:02G                                     | 458         | 676         | 16026         | 78          | 2755         | 313         | 2146         | 22452         | C                                                    | C        | C        | C        | C        | C        | C        | C        | C                 |
| B*27:05:02:01                                           | 27:05:02:01            | HLA00225  | 27:05:02G                                     | 23          | 31          | 1113          | 3           | 184          | 12          | 132          | 1498          | WD                                                   | I        | I        |          | C        | C        | I        | I        | C                 |
| B*27:05:02:02                                           | 27:05:02:02            | HLA16809  | 27:05:02G                                     | 0           | 0           | 1             | 0           | 0            | 0           | 0            | 1             |                                                      |          |          |          |          |          |          |          |                   |
| B*27:05:02:05                                           | 27:05:02:05            | HLA17223  | 27:05:02G                                     | 0           | 0           | 1             | 0           | 0            | 0           | 0            | 1             |                                                      |          |          |          |          |          |          |          |                   |
| B*27:05:04                                              | 27:05:04               | HLA01179  | 27:05:02G                                     | 0           | 0           | 22            | 0           | 1            | 0           | 2            | 25            |                                                      |          | WD       |          |          |          |          | WD       | WD                |
| B*27:13                                                 | 27:13                  | HLA00234  | 27:05:02G                                     | 1           | 0           | 28            | 0           | 4            | 0           | 3            | 36            |                                                      |          | WD       |          |          |          |          | WD       | WD                |
| B*27:05:03                                              | 27:05:03               | HLA00226  |                                               | 2           | 15          | 8080          | 13          | 11           | 0           | 277          | 8398          |                                                      | I        | C        | WD       | I        |          | C        | C        | C                 |
| B*27:05:05                                              | 27:05:05               | HLA01642  |                                               | 0           | 0           | 8             | 0           | 13           | 0           | 3            | 24            |                                                      |          | WD       |          | I        |          | WD       | I        |                   |
| B*27:05:07                                              | 27:05:07               | HLA01985  |                                               | 0           | 0           | 50            | 0           | 2            | 0           | 3            | 55            |                                                      |          | WD       |          |          |          | WD       | WD       |                   |
| B*27:05:08                                              | 27:05:08               | HLA02100  |                                               | 0           | 0           | 8             | 0           | 0            | 0           | 0            | 8             |                                                      |          | WD       |          |          |          | WD       | WD       |                   |
| B*27:05:09                                              | 27:05:09               | HLA02218  |                                               | 0           | 0           | 43            | 0           | 0            | 0           | 0            | 43            |                                                      |          | WD       |          |          |          | WD       | WD       |                   |
| B*27:05:10                                              | 27:05:10               | HLA02826  |                                               | 0           | 0           | 8             | 0           | 0            | 0           | 1            | 9             |                                                      |          | WD       |          |          |          | WD       | WD       |                   |
| B*27:05:15                                              | 27:05:15               | HLA05477  |                                               | 0           | 0           | 2             | 0           | 0            | 0           | 0            | 2             |                                                      |          |          |          |          |          |          |          |                   |
| B*27:05:18                                              | 27:05:18               | HLA07634  |                                               | 0           | 0           | 42            | 0           | 0            | 0           | 3            | 45            |                                                      |          | WD       |          |          |          | WD       | WD       |                   |
| B*27:05:20                                              | 27:05:20               | HLA08661  |                                               | 0           | 0           | 1             | 0           | 0            | 0           | 0            | 1             |                                                      |          |          |          |          |          |          |          |                   |

| Supplemental Table 9: HLA-B Allele Summary <sup>a</sup> |                        |           | Allele Count by Population Group <sup>b</sup> |           |             |             |             |            |           |             |              | 3.0.0 CIWD Category by Population Group <sup>c</sup> |          |          |          |          |          |          |          |                   |
|---------------------------------------------------------|------------------------|-----------|-----------------------------------------------|-----------|-------------|-------------|-------------|------------|-----------|-------------|--------------|------------------------------------------------------|----------|----------|----------|----------|----------|----------|----------|-------------------|
| Allele                                                  | Genomic typing         | Allele ID | G group                                       | AFA       | API         | EURO        | MENA        | HIS        | NAM       | UNK         | Total        | AFA                                                  | API      | EURO     | MENA     | HIS      | NAM      | UNK      | Total    | Highest Frequency |
| B*27:05:21                                              | 27:05:21               | HLA08979  |                                               | 0         | 0           | 10          | 0           | 0          | 0         | 0           | 10           |                                                      |          | WD       |          |          |          |          | WD       | WD                |
| B*27:05:22                                              | 27:05:22               | HLA08980  |                                               | 0         | 0           | 3           | 0           | 0          | 0         | 0           | 3            |                                                      |          |          |          |          |          |          |          |                   |
| B*27:05:23                                              | 27:05:23               | HLA09882  |                                               | 0         | 0           | 5           | 0           | 0          | 0         | 1           | 6            |                                                      |          | WD       |          |          |          |          | WD       | WD                |
| B*27:05:24                                              | 27:05:24               | HLA09884  |                                               | 0         | 0           | 2           | 0           | 0          | 0         | 0           | 2            |                                                      |          |          |          |          |          |          |          |                   |
| B*27:05:25                                              | 27:05:25               | HLA10198  |                                               | 0         | 0           | 1           | 0           | 0          | 0         | 0           | 1            |                                                      |          |          |          |          |          |          |          |                   |
| B*27:05:26                                              | 27:05:26               | HLA10269  |                                               | 0         | 0           | 3           | 0           | 0          | 0         | 0           | 3            |                                                      |          |          |          |          |          |          |          |                   |
| B*27:05:27                                              | 27:05:27               | HLA11005  |                                               | 0         | 0           | 3           | 0           | 0          | 0         | 0           | 3            |                                                      |          |          |          |          |          |          |          |                   |
| B*27:05:30                                              | 27:05:30               | HLA12266  |                                               | 0         | 4           | 0           | 0           | 0          | 0         | 0           | 4            |                                                      |          |          |          |          |          |          |          |                   |
| B*27:06                                                 | 27:06                  | HLA00227  |                                               | 81        | 2287        | 111         | 13          | 35         | 4         | 449         | 2980         | C                                                    | C        | WD       | WD       | I        |          | C        | C        | C                 |
| <b>B*27:07 total</b>                                    | <b>27:07 total</b>     |           |                                               | <b>70</b> | <b>4384</b> | <b>4690</b> | <b>1079</b> | <b>263</b> | <b>22</b> | <b>1194</b> | <b>11702</b> | <b>C</b>                                             | <b>C</b> | <b>C</b> | <b>C</b> | <b>C</b> | <b>C</b> | <b>C</b> | <b>C</b> | <b>C</b>          |
| B*27:07                                                 | 27:07                  |           |                                               | 43        | 407         | 1605        | 324         | 117        | 13        | 862         | 3371         | C                                                    | C        | C        | C        | C        | C        | C        | C        | C                 |
| B*27:07P                                                | 27:07P                 |           |                                               | 0         | 0           | 2           | 1           | 0          | 0         | 0           | 3            |                                                      |          |          |          |          |          |          |          |                   |
| <b>B*27:07:01G total</b>                                | <b>27:07:01G total</b> |           |                                               | <b>27</b> | <b>3973</b> | <b>3083</b> | <b>754</b>  | <b>146</b> | <b>9</b>  | <b>332</b>  | <b>8324</b>  | <b>WD</b>                                            | <b>C</b> | <b>C</b> | <b>C</b> | <b>C</b> | <b>C</b> | <b>C</b> | <b>C</b> | <b>C</b>          |
| B*27:07:01G                                             | 27:07:01G              |           | 27:07:01G                                     | 20        | 3722        | 2858        | 718         | 64         | 1         | 290         | 7673         | WD                                                   | C        | C        | C        | I        |          | C        | C        | C                 |
| B*27:07:01                                              | 27:07:01               | HLA00228  | 27:07:01G                                     | 7         | 251         | 225         | 36          | 82         | 8         | 42          | 651          | WD                                                   | C        | I        | WD       | C        | C        | I        | I        | C                 |
| B*27:07:03                                              | 27:07:03               | HLA08329  |                                               | 0         | 2           | 0           | 0           | 0          | 0         | 0           | 2            |                                                      |          |          |          |          |          |          |          |                   |
| B*27:07:04                                              | 27:07:04               | HLA09883  |                                               | 0         | 2           | 0           | 0           | 0          | 0         | 0           | 2            |                                                      |          |          |          |          |          |          |          |                   |
| B*27:08                                                 | 27:08                  | HLA00229  |                                               | 6         | 4           | 396         | 20          | 71         | 5         | 113         | 615          | WD                                                   |          | I        | WD       | C        | WD       | I        | I        | C                 |
| B*27:09                                                 | 27:09                  | HLA00230  |                                               | 4         | 17          | 1609        | 32          | 24         | 1         | 57          | 1744         |                                                      | I        | C        | WD       | I        |          | I        | C        | C                 |
| B*27:10                                                 | 27:10                  | HLA00231  |                                               | 10        | 1           | 572         | 1           | 11         | 1         | 55          | 651          | WD                                                   |          | I        |          | I        |          | I        | I        | I                 |
| B*27:11                                                 | 27:11                  | HLA00232  |                                               | 0         | 2           | 0           | 0           | 0          | 0         | 0           | 2            |                                                      |          |          |          |          |          |          |          |                   |
| <b>B*27:12 total</b>                                    | <b>27:12 total</b>     |           |                                               | <b>15</b> | <b>2</b>    | <b>1058</b> | <b>167</b>  | <b>77</b>  | <b>0</b>  | <b>225</b>  | <b>1544</b>  | <b>WD</b>                                            |          | <b>I</b> | <b>C</b> | <b>C</b> |          | <b>C</b> | <b>I</b> | <b>C</b>          |
| <b>B*27:12:01G total</b>                                | <b>27:12:01G total</b> |           |                                               | <b>15</b> | <b>2</b>    | <b>1058</b> | <b>167</b>  | <b>77</b>  | <b>0</b>  | <b>225</b>  | <b>1544</b>  | <b>WD</b>                                            |          | <b>I</b> | <b>C</b> | <b>C</b> |          | <b>C</b> | <b>I</b> | <b>C</b>          |
| B*27:12                                                 | 27:12                  |           | 27:12:01G                                     | 15        | 2           | 1058        | 167         | 77         | 0         | 225         | 1544         | WD                                                   |          | I        | C        | C        |          | C        | I        | C                 |
| B*27:14                                                 | 27:14                  | HLA00235  |                                               | 10        | 25          | 1464        | 9           | 17         | 4         | 87          | 1616         | WD                                                   | I        | C        | WD       | I        |          | I        | C        | C                 |
| B*27:15                                                 | 27:15                  | HLA00236  |                                               | 0         | 19          | 0           | 0           | 0          | 0         | 3           | 22           |                                                      | I        |          |          |          |          |          | WD       | I                 |
| B*27:16                                                 | 27:16                  | HLA01056  |                                               | 0         | 0           | 1           | 0           | 0          | 0         | 0           | 1            |                                                      |          |          |          |          |          |          |          |                   |
| B*27:17                                                 | 27:17                  | HLA01130  |                                               | 6         | 0           | 34          | 0           | 3          | 0         | 9           | 52           | WD                                                   |          | WD       |          |          |          | WD       | WD       | WD                |
| B*27:18                                                 | 27:18                  | HLA01143  |                                               | 0         | 7           | 0           | 0           | 0          | 0         | 0           | 7            |                                                      | WD       |          |          |          |          |          | WD       | WD                |
| B*27:19                                                 | 27:19                  | HLA01147  |                                               | 0         | 0           | 25          | 22          | 1          | 0         | 2           | 50           |                                                      |          | WD       | WD       |          |          |          | WD       | WD                |
| B*27:20                                                 | 27:20                  | HLA01173  |                                               | 0         | 15          | 1           | 0           | 0          | 0         | 3           | 19           |                                                      | I        |          |          |          |          |          | WD       | I                 |

| Supplemental Table 9: HLA-B Allele Summary <sup>a</sup> |                    |           | Allele Count by Population Group <sup>b</sup> |          |          |          |          |          |          |          |          | 3.0.0 CIWD Category by Population Group <sup>c</sup> |     |      |      |     |     |     |       |                   |
|---------------------------------------------------------|--------------------|-----------|-----------------------------------------------|----------|----------|----------|----------|----------|----------|----------|----------|------------------------------------------------------|-----|------|------|-----|-----|-----|-------|-------------------|
| Allele                                                  | Genomic typing     | Allele ID | G group                                       | AFA      | API      | EURO     | MENA     | HIS      | NAM      | UNK      | Total    | AFA                                                  | API | EURO | MENA | HIS | NAM | UNK | Total | Highest Frequency |
| B*27:23                                                 | 27:23              | HLA01348  |                                               | 0        | 0        | 4        | 0        | 0        | 0        | 1        | 5        |                                                      |     |      |      |     |     |     | WD    | WD                |
| B*27:24                                                 | 27:24              | HLA01504  |                                               | 0        | 11       | 0        | 0        | 0        | 0        | 1        | 12       |                                                      | WD  |      |      |     |     |     | WD    | WD                |
| B*27:25                                                 | 27:25              | HLA01529  |                                               | 0        | 8        | 7        | 2        | 0        | 0        | 0        | 17       |                                                      | WD  | WD   |      |     |     |     | WD    | WD                |
| B*27:26                                                 | 27:26              | HLA01952  |                                               | 15       | 0        | 3        | 3        | 0        | 0        | 1        | 22       | WD                                                   |     |      |      |     |     |     | WD    | WD                |
| B*27:27                                                 | 27:27              | HLA02023  |                                               | 0        | 1        | 1        | 0        | 14       | 0        | 3        | 19       |                                                      |     |      |      | I   |     |     | WD    | I                 |
| B*27:30                                                 | 27:30              | HLA02238  |                                               | 1        | 0        | 25       | 2        | 2        | 0        | 4        | 34       |                                                      |     | WD   |      |     |     |     | WD    | WD                |
| B*27:32                                                 | 27:32              | HLA02370  |                                               | 0        | 0        | 6        | 0        | 0        | 0        | 0        | 6        |                                                      |     | WD   |      |     |     |     | WD    | WD                |
| B*27:34                                                 | 27:34              | HLA02473  |                                               | 0        | 0        | 11       | 0        | 0        | 0        | 0        | 11       |                                                      |     | WD   |      |     |     |     | WD    | WD                |
| B*27:35                                                 | 27:35              | HLA02499  |                                               | 0        | 0        | 6        | 0        | 0        | 0        | 8        | 14       |                                                      |     | WD   |      |     |     | WD  | WD    | WD                |
| B*27:36                                                 | 27:36              | HLA02513  |                                               | 0        | 3        | 1        | 0        | 0        | 0        | 0        | 4        |                                                      |     |      |      |     |     |     |       |                   |
| B*27:37                                                 | 27:37              | HLA02784  |                                               | 0        | 0        | 1        | 0        | 0        | 0        | 0        | 1        |                                                      |     |      |      |     |     |     |       |                   |
| B*27:39                                                 | 27:39              | HLA03176  |                                               | 0        | 0        | 0        | 0        | 2        | 0        | 1        | 3        |                                                      |     |      |      |     |     |     |       |                   |
| B*27:41                                                 | 27:41              | HLA03276  |                                               | 0        | 0        | 2        | 0        | 0        | 0        | 10       | 12       |                                                      |     |      |      |     |     | WD  | WD    | WD                |
| B*27:42                                                 | 27:42              | HLA03278  |                                               | 0        | 1        | 5        | 0        | 0        | 0        | 9        | 15       |                                                      |     | WD   |      |     |     | WD  | WD    | WD                |
| B*27:43                                                 | 27:43              | HLA03323  |                                               | 0        | 9        | 0        | 0        | 0        | 0        | 0        | 9        |                                                      | WD  |      |      |     |     |     | WD    | WD                |
| B*27:45                                                 | 27:45              | HLA03554  |                                               | 0        | 0        | 1        | 0        | 0        | 1        | 0        | 2        |                                                      |     |      |      |     |     |     |       |                   |
| B*27:46                                                 | 27:46              | HLA03616  |                                               | 0        | 0        | 3        | 1        | 0        | 0        | 1        | 5        |                                                      |     |      |      |     |     |     | WD    | WD                |
| B*27:47                                                 | 27:47              | HLA03659  |                                               | 0        | 0        | 15       | 0        | 0        | 0        | 0        | 15       |                                                      |     | WD   |      |     |     |     | WD    | WD                |
| B*27:48                                                 | 27:48              | HLA03661  |                                               | 0        | 0        | 7        | 0        | 0        | 0        | 0        | 7        |                                                      |     | WD   |      |     |     |     | WD    | WD                |
| B*27:49                                                 | 27:49              | HLA03677  |                                               | 0        | 0        | 6        | 0        | 0        | 0        | 0        | 6        |                                                      |     | WD   |      |     |     |     | WD    | WD                |
| <b>B*27:50 total</b>                                    | <b>27:50 total</b> |           |                                               | <b>0</b> | <b>0</b> | <b>1</b> | <b>0</b> | <b>0</b> | <b>0</b> | <b>1</b> | <b>2</b> |                                                      |     |      |      |     |     |     |       |                   |
| B*27:50                                                 | 27:50              |           |                                               | 0        | 0        | 0        | 0        | 0        | 0        | 1        | 1        |                                                      |     |      |      |     |     |     |       |                   |
| B*27:50:02                                              | 27:50:02           | HLA12563  |                                               | 0        | 0        | 1        | 0        | 0        | 0        | 0        | 1        |                                                      |     |      |      |     |     |     |       |                   |
| B*27:51                                                 | 27:51              | HLA03810  |                                               | 0        | 0        | 128      | 0        | 0        | 0        | 0        | 128      |                                                      |     | I    |      |     |     |     | WD    | I                 |
| B*27:52                                                 | 27:52              | HLA03824  |                                               | 0        | 0        | 2        | 0        | 0        | 0        | 0        | 2        |                                                      |     |      |      |     |     |     |       |                   |
| B*27:53                                                 | 27:53              | HLA03952  |                                               | 0        | 0        | 10       | 2        | 0        | 0        | 0        | 12       |                                                      |     | WD   |      |     |     |     | WD    | WD                |
| B*27:54                                                 | 27:54              | HLA03955  |                                               | 1        | 0        | 0        | 0        | 0        | 0        | 0        | 1        |                                                      |     |      |      |     |     |     |       |                   |
| B*27:56                                                 | 27:56              | HLA04053  |                                               | 0        | 0        | 11       | 0        | 0        | 0        | 1        | 12       |                                                      |     | WD   |      |     |     |     | WD    | WD                |
| B*27:58                                                 | 27:58              | HLA04175  |                                               | 0        | 0        | 1        | 0        | 0        | 0        | 0        | 1        |                                                      |     |      |      |     |     |     |       |                   |
| B*27:60                                                 | 27:60              | HLA04443  |                                               | 0        | 0        | 11       | 0        | 0        | 0        | 0        | 11       |                                                      |     | WD   |      |     |     |     | WD    | WD                |
| B*27:61                                                 | 27:61              | HLA04449  |                                               | 0        | 9        | 0        | 3        | 0        | 0        | 1        | 13       |                                                      | WD  |      |      |     |     |     | WD    | WD                |

| Supplemental Table 9: HLA-B Allele Summary <sup>a</sup> |                    |           | Allele Count by Population Group <sup>b</sup> |          |          |          |          |          |          |          |          | 3.0.0 CIWD Category by Population Group <sup>c</sup> |     |           |      |     |     |     |           |                   |
|---------------------------------------------------------|--------------------|-----------|-----------------------------------------------|----------|----------|----------|----------|----------|----------|----------|----------|------------------------------------------------------|-----|-----------|------|-----|-----|-----|-----------|-------------------|
| Allele                                                  | Genomic typing     | Allele ID | G group                                       | AFA      | API      | EURO     | MENA     | HIS      | NAM      | UNK      | Total    | AFA                                                  | API | EURO      | MENA | HIS | NAM | UNK | Total     | Highest Frequency |
| B*27:65N                                                | 27:65N             | HLA04771  |                                               | 0        | 0        | 2        | 0        | 0        | 0        | 0        | 2        |                                                      |     |           |      |     |     |     |           |                   |
| B*27:70                                                 | 27:70              | HLA05473  |                                               | 0        | 0        | 15       | 2        | 0        | 0        | 1        | 18       |                                                      |     | WD        |      |     |     |     | WD        | WD                |
| B*27:72                                                 | 27:72              | HLA05504  |                                               | 0        | 0        | 2        | 0        | 0        | 0        | 0        | 2        |                                                      |     |           |      |     |     |     |           |                   |
| B*27:73                                                 | 27:73              | HLA05517  |                                               | 0        | 0        | 7        | 0        | 0        | 0        | 0        | 7        |                                                      |     | WD        |      |     |     |     | WD        | WD                |
| B*27:74                                                 | 27:74              | HLA06183  |                                               | 0        | 0        | 1        | 0        | 0        | 0        | 0        | 1        |                                                      |     |           |      |     |     |     |           |                   |
| B*27:75                                                 | 27:75              | HLA06212  |                                               | 0        | 0        | 0        | 0        | 1        | 0        | 0        | 1        |                                                      |     |           |      |     |     |     |           |                   |
| B*27:76                                                 | 27:76              | HLA06230  |                                               | 0        | 0        | 1        | 0        | 0        | 0        | 0        | 1        |                                                      |     |           |      |     |     |     |           |                   |
| B*27:78                                                 | 27:78              | HLA06256  |                                               | 0        | 0        | 3        | 0        | 0        | 0        | 0        | 3        |                                                      |     |           |      |     |     |     |           |                   |
| B*27:80                                                 | 27:80              | HLA06353  |                                               | 0        | 0        | 3        | 0        | 1        | 0        | 1        | 5        |                                                      |     |           |      |     |     |     | WD        | WD                |
| B*27:81                                                 | 27:81              | HLA06940  |                                               | 0        | 0        | 1        | 0        | 0        | 0        | 0        | 1        |                                                      |     |           |      |     |     |     |           |                   |
| B*27:82                                                 | 27:82              | HLA06993  |                                               | 1        | 0        | 15       | 0        | 0        | 0        | 0        | 16       |                                                      |     | WD        |      |     |     |     | WD        | WD                |
| B*27:83                                                 | 27:83              | HLA07187  |                                               | 0        | 0        | 9        | 0        | 0        | 0        | 0        | 9        |                                                      |     | WD        |      |     |     |     | WD        | WD                |
| B*27:84                                                 | 27:84              | HLA07188  |                                               | 0        | 0        | 3        | 0        | 0        | 0        | 2        | 5        |                                                      |     |           |      |     |     |     | WD        | WD                |
| B*27:85                                                 | 27:85              | HLA07177  |                                               | 0        | 1        | 109      | 0        | 0        | 0        | 0        | 110      |                                                      |     | WD        |      |     |     |     | WD        | WD                |
| B*27:86                                                 | 27:86              | HLA07339  |                                               | 0        | 1        | 0        | 0        | 0        | 0        | 0        | 1        |                                                      |     |           |      |     |     |     |           |                   |
| B*27:88                                                 | 27:88              | HLA07631  |                                               | 0        | 0        | 2        | 0        | 0        | 0        | 0        | 2        |                                                      |     |           |      |     |     |     |           |                   |
| <b>B*27:90 total</b>                                    | <b>27:90 total</b> |           |                                               | <b>0</b> | <b>0</b> | <b>9</b> | <b>0</b> | <b>0</b> | <b>0</b> | <b>0</b> | <b>9</b> |                                                      |     | <b>WD</b> |      |     |     |     | <b>WD</b> | <b>WD</b>         |
| B*27:90                                                 | 27:90              |           |                                               | 0        | 0        | 1        | 0        | 0        | 0        | 0        | 1        |                                                      |     |           |      |     |     |     |           |                   |
| B*27:90:01                                              | 27:90:01           | HLA07902  |                                               | 0        | 0        | 3        | 0        | 0        | 0        | 0        | 3        |                                                      |     |           |      |     |     |     |           |                   |
| B*27:90:02                                              | 27:90:02           | HLA08505  |                                               | 0        | 0        | 4        | 0        | 0        | 0        | 0        | 4        |                                                      |     |           |      |     |     |     |           |                   |
| B*27:90:03                                              | 27:90:03           | HLA11819  |                                               | 0        | 0        | 1        | 0        | 0        | 0        | 0        | 1        |                                                      |     |           |      |     |     |     |           |                   |
| B*27:91                                                 | 27:91              | HLA07903  |                                               | 0        | 1        | 0        | 0        | 0        | 0        | 2        | 3        |                                                      |     |           |      |     |     |     |           |                   |
| B*27:94N                                                | 27:94N             | HLA08330  |                                               | 0        | 1        | 0        | 0        | 0        | 0        | 0        | 1        |                                                      |     |           |      |     |     |     |           |                   |
| B*27:95                                                 | 27:95              | HLA08331  |                                               | 0        | 0        | 1        | 0        | 0        | 0        | 0        | 1        |                                                      |     |           |      |     |     |     |           |                   |
| B*27:99                                                 | 27:99              | HLA08662  |                                               | 0        | 0        | 1        | 0        | 0        | 0        | 0        | 1        |                                                      |     |           |      |     |     |     |           |                   |
| B*27:101                                                | 27:101             | HLA09308  |                                               | 0        | 0        | 3        | 0        | 0        | 0        | 0        | 3        |                                                      |     |           |      |     |     |     |           |                   |
| B*27:104                                                | 27:104             | HLA09426  |                                               | 0        | 0        | 3        | 0        | 1        | 0        | 0        | 4        |                                                      |     |           |      |     |     |     |           |                   |
| B*27:108                                                | 27:108             | HLA10402  |                                               | 0        | 1        | 0        | 0        | 0        | 0        | 0        | 1        |                                                      |     |           |      |     |     |     |           |                   |
| B*27:118                                                | 27:118             | HLA10906  |                                               | 0        | 0        | 3        | 0        | 0        | 0        | 0        | 3        |                                                      |     |           |      |     |     |     |           |                   |
| B*27:119                                                | 27:119             | HLA11002  |                                               | 0        | 0        | 0        | 0        | 1        | 0        | 0        | 1        |                                                      |     |           |      |     |     |     |           |                   |
| B*27:120                                                | 27:120             | HLA11003  |                                               | 0        | 1        | 0        | 0        | 0        | 0        | 0        | 1        |                                                      |     |           |      |     |     |     |           |                   |

| Supplemental Table 9: HLA-B Allele Summary <sup>a</sup> |                        |           | Allele Count by Population Group <sup>b</sup> |              |              |               |              |              |             |              |               | 3.0.0 CIWD Category by Population Group <sup>c</sup> |          |          |          |          |          |          |          |                   |          |
|---------------------------------------------------------|------------------------|-----------|-----------------------------------------------|--------------|--------------|---------------|--------------|--------------|-------------|--------------|---------------|------------------------------------------------------|----------|----------|----------|----------|----------|----------|----------|-------------------|----------|
| Allele                                                  | Genomic typing         | Allele ID | G group                                       | AFA          | API          | EURO          | MENA         | HIS          | NAM         | UNK          | Total         | AFA                                                  | API      | EURO     | MENA     | HIS      | NAM      | UNK      | Total    | Highest Frequency |          |
| B*27:122                                                | 27:122                 | HLA11006  |                                               | 0            | 0            | 1             | 0            | 0            | 0           | 1            | 2             |                                                      |          |          |          |          |          |          |          |                   |          |
| B*27:123                                                | 27:123                 | HLA11225  |                                               | 0            | 0            | 1             | 0            | 0            | 0           | 0            | 1             |                                                      |          |          |          |          |          |          |          |                   |          |
| B*27:127                                                | 27:127                 | HLA11649  |                                               | 0            | 0            | 1             | 0            | 0            | 0           | 0            | 1             |                                                      |          |          |          |          |          |          |          |                   |          |
| B*27:128                                                | 27:128                 | HLA11729  |                                               | 0            | 0            | 1             | 0            | 0            | 0           | 0            | 1             |                                                      |          |          |          |          |          |          |          |                   |          |
| B*27:130                                                | 27:130                 | HLA12037  |                                               | 0            | 3            | 0             | 0            | 0            | 0           | 1            | 4             |                                                      |          |          |          |          |          |          |          |                   |          |
| B*27:132                                                | 27:132                 | HLA12473  |                                               | 0            | 0            | 2             | 0            | 0            | 0           | 0            | 2             |                                                      |          |          |          |          |          |          |          |                   |          |
| B*27:133                                                | 27:133                 | HLA12441  |                                               | 0            | 0            | 2             | 0            | 0            | 0           | 0            | 2             |                                                      |          |          |          |          |          |          |          |                   |          |
| B*27:134                                                | 27:134                 | HLA12658  |                                               | 0            | 0            | 0             | 0            | 0            | 0           | 1            | 1             |                                                      |          |          |          |          |          |          |          |                   |          |
| B*27:135                                                | 27:135                 | HLA12659  |                                               | 0            | 0            | 0             | 0            | 0            | 1           | 0            | 1             |                                                      |          |          |          |          |          |          |          |                   |          |
| B*27:137                                                | 27:137                 | HLA12980  |                                               | 0            | 0            | 1             | 0            | 0            | 0           | 0            | 1             |                                                      |          |          |          |          |          |          |          |                   |          |
| B*27:139                                                | 27:139                 | HLA13465  |                                               | 1            | 0            | 0             | 0            | 0            | 0           | 0            | 1             |                                                      |          |          |          |          |          |          |          |                   |          |
| B*27:140                                                | 27:140                 | HLA13466  |                                               | 0            | 0            | 1             | 0            | 0            | 0           | 0            | 1             |                                                      |          |          |          |          |          |          |          |                   |          |
| B*27:141                                                | 27:141                 | HLA13651  |                                               | 0            | 0            | 1             | 0            | 0            | 0           | 0            | 1             |                                                      |          |          |          |          |          |          |          |                   |          |
| B*27:142                                                | 27:142                 | HLA13741  |                                               | 0            | 0            | 3             | 0            | 0            | 0           | 0            | 3             |                                                      |          |          |          |          |          |          |          |                   |          |
| B*27:148                                                | 27:148                 | HLA14925  |                                               | 0            | 0            | 1             | 0            | 0            | 0           | 0            | 1             |                                                      |          |          |          |          |          |          |          |                   |          |
| B*27:151                                                | 27:151                 | HLA14978  |                                               | 0            | 0            | 0             | 0            | 0            | 0           | 2            | 2             |                                                      |          |          |          |          |          |          |          |                   |          |
| B*27:165                                                | 27:165                 | HLA18037  |                                               | 0            | 1            | 0             | 0            | 0            | 0           | 0            | 1             |                                                      |          |          |          |          |          |          |          |                   |          |
| B*27:CODE                                               | 27:CODE                |           |                                               | 244          | 646          | 36826         | 252          | 1116         | 139         | 2409         | 41632         | NA                                                   | NA       | NA       | NA       | NA       | NA       | NA       | NA       | NA                | NA       |
| <b>B*35:01 total</b>                                    | <b>35:01 total</b>     |           |                                               | <b>23840</b> | <b>61380</b> | <b>628096</b> | <b>24407</b> | <b>38398</b> | <b>3937</b> | <b>69383</b> | <b>849441</b> | <b>C</b>                                             | <b>C</b> | <b>C</b> | <b>C</b> | <b>C</b> | <b>C</b> | <b>C</b> | <b>C</b> | <b>C</b>          | <b>C</b> |
| B*35:01                                                 | 35:01                  |           |                                               | 7            | 2            | 3732          | 9            | 15           | 0           | 144          | 3909          | WD                                                   |          | C        | WD       | I        |          | C        | C        | C                 |          |
| B*35:01P                                                | 35:01P                 |           |                                               | 1            | 5            | 1296          | 2            | 3            | 0           | 5            | 1312          |                                                      | WD       | C        |          |          |          | WD       | I        | C                 |          |
| <b>B*35:01:01G total</b>                                | <b>35:01:01G total</b> |           |                                               | <b>23821</b> | <b>61372</b> | <b>622871</b> | <b>24383</b> | <b>38377</b> | <b>3937</b> | <b>69210</b> | <b>843971</b> | <b>C</b>                                             | <b>C</b> | <b>C</b> | <b>C</b> | <b>C</b> | <b>C</b> | <b>C</b> | <b>C</b> | <b>C</b>          | <b>C</b> |
| B*35:01:01G                                             | 35:01:01G              |           | 35:01:01G                                     | 19667        | 57534        | 596537        | 23848        | 29211        | 3051        | 64271        | 794119        | C                                                    | C        | C        | C        | C        | C        | C        | C        | C                 | C        |
| B*35:01:01                                              | 35:01:01               |           | 35:01:01G                                     | 4152         | 3834         | 26139         | 532          | 9149         | 886         | 4928         | 49620         | C                                                    | C        | C        | C        | C        | C        | C        | C        | C                 | C        |
| B*35:01:01:01                                           | 35:01:01:01            | HLA00237  | 35:01:01G                                     | 0            | 0            | 6             | 0            | 0            | 0           | 0            | 6             |                                                      |          | WD       |          |          |          |          | WD       | WD                |          |
| B*35:01:01:02                                           | 35:01:01:02            | HLA05354  | 35:01:01G                                     | 0            | 0            | 38            | 0            | 0            | 0           | 4            | 42            |                                                      |          | WD       |          |          |          |          | WD       | WD                |          |
| B*35:01:01:05                                           | 35:01:01:05            | HLA16276  | 35:01:01G                                     | 0            | 0            | 113           | 0            | 0            | 0           | 0            | 113           |                                                      |          | WD       |          |          |          |          | WD       | WD                |          |
| B*35:01:01:06                                           | 35:01:01:06            | HLA16278  | 35:01:01G                                     | 0            | 0            | 5             | 0            | 0            | 0           | 0            | 5             |                                                      |          | WD       |          |          |          |          | WD       | WD                |          |
| B*35:01:01:07                                           | 35:01:01:07            | HLA17063  | 35:01:01G                                     | 0            | 0            | 0             | 0            | 0            | 0           | 1            | 1             |                                                      |          |          |          |          |          |          |          |                   |          |
| B*35:01:23                                              | 35:01:23               | HLA06139  | 35:01:01G                                     | 0            | 3            | 0             | 0            | 0            | 0           | 0            | 3             |                                                      |          |          |          |          |          |          |          |                   |          |
| B*35:01:41                                              | 35:01:41               | HLA10884  | 35:01:01G                                     | 0            | 1            | 0             | 1            | 0            | 0           | 0            | 2             |                                                      |          |          |          |          |          |          |          |                   |          |

| Supplemental Table 9: HLA-B Allele Summary <sup>a</sup> |                        |           | Allele Count by Population Group <sup>b</sup> |            |             |               |              |             |            |              |               | 3.0.0 CIWD Category by Population Group <sup>c</sup> |          |           |          |          |          |          |           |                   |
|---------------------------------------------------------|------------------------|-----------|-----------------------------------------------|------------|-------------|---------------|--------------|-------------|------------|--------------|---------------|------------------------------------------------------|----------|-----------|----------|----------|----------|----------|-----------|-------------------|
| Allele                                                  | Genomic typing         | Allele ID | G group                                       | AFA        | API         | EURO          | MENA         | HIS         | NAM        | UNK          | Total         | AFA                                                  | API      | EURO      | MENA     | HIS      | NAM      | UNK      | Total     | Highest Frequency |
| B*35:42:01                                              | 35:42:01               | HLA01578  | 35:01:01G                                     | 0          | 0           | 5             | 2            | 1           | 0          | 0            | 8             |                                                      |          | WD        |          |          |          |          | WD        | WD                |
| B*35:57                                                 | 35:57                  | HLA02091  | 35:01:01G                                     | 0          | 0           | 25            | 0            | 0           | 0          | 2            | 27            |                                                      |          | WD        |          |          |          |          | WD        | WD                |
| B*35:241                                                | 35:241                 | HLA09923  | 35:01:01G                                     | 0          | 0           | 2             | 0            | 14          | 0          | 2            | 18            |                                                      |          |           |          | I        |          |          | WD        | I                 |
| B*35:250                                                | 35:250                 | HLA10886  | 35:01:01G                                     | 2          | 0           | 0             | 0            | 0           | 0          | 1            | 3             |                                                      |          |           |          |          |          |          |           |                   |
| B*35:332                                                | 35:332                 | HLA16354  | 35:01:01G                                     | 0          | 0           | 1             | 0            | 2           | 0          | 1            | 4             |                                                      |          |           |          |          |          |          |           |                   |
| B*35:01:02                                              | 35:01:02               | HLA01264  |                                               | 1          | 0           | 18            | 0            | 0           | 0          | 2            | 21            |                                                      |          | WD        |          |          |          |          | WD        | WD                |
| B*35:01:04                                              | 35:01:04               | HLA02176  |                                               | 5          | 0           | 1             | 0            | 0           | 0          | 1            | 7             | WD                                                   |          |           |          |          |          |          | WD        | WD                |
| B*35:01:05                                              | 35:01:05               | HLA02313  |                                               | 0          | 0           | 110           | 0            | 0           | 0          | 17           | 127           |                                                      |          | WD        |          |          |          | I        | WD        | I                 |
| B*35:01:06                                              | 35:01:06               | HLA02566  |                                               | 0          | 0           | 7             | 0            | 0           | 0          | 2            | 9             |                                                      |          | WD        |          |          |          |          | WD        | WD                |
| B*35:01:07                                              | 35:01:07               | HLA03288  |                                               | 0          | 0           | 13            | 0            | 0           | 0          | 0            | 13            |                                                      |          | WD        |          |          |          |          | WD        | WD                |
| B*35:01:08                                              | 35:01:08               | HLA03796  |                                               | 0          | 0           | 5             | 0            | 0           | 0          | 0            | 5             |                                                      |          | WD        |          |          |          |          | WD        | WD                |
| B*35:01:09                                              | 35:01:09               | HLA03963  |                                               | 0          | 0           | 1             | 0            | 2           | 0          | 0            | 3             |                                                      |          |           |          |          |          |          |           |                   |
| B*35:01:10                                              | 35:01:10               | HLA04114  |                                               | 0          | 0           | 0             | 1            | 0           | 0          | 0            | 1             |                                                      |          |           |          |          |          |          |           |                   |
| B*35:01:11                                              | 35:01:11               | HLA04179  |                                               | 0          | 0           | 4             | 11           | 0           | 0          | 1            | 16            |                                                      |          |           | WD       |          |          |          | WD        | WD                |
| B*35:01:14                                              | 35:01:14               | HLA04434  |                                               | 0          | 0           | 1             | 0            | 0           | 0          | 0            | 1             |                                                      |          |           |          |          |          |          |           |                   |
| B*35:01:17                                              | 35:01:17               | HLA04474  |                                               | 0          | 0           | 0             | 1            | 0           | 0          | 0            | 1             |                                                      |          |           |          |          |          |          |           |                   |
| B*35:01:19                                              | 35:01:19               | HLA04544  |                                               | 0          | 0           | 17            | 0            | 0           | 0          | 1            | 18            |                                                      |          | WD        |          |          |          |          | WD        | WD                |
| B*35:01:26                                              | 35:01:26               | HLA06651  |                                               | 0          | 0           | 1             | 0            | 0           | 0          | 0            | 1             |                                                      |          |           |          |          |          |          |           |                   |
| B*35:01:27                                              | 35:01:27               | HLA06689  |                                               | 5          | 0           | 0             | 0            | 0           | 0          | 0            | 5             | WD                                                   |          |           |          |          |          |          | WD        | WD                |
| B*35:01:29                                              | 35:01:29               | HLA07003  |                                               | 0          | 0           | 11            | 0            | 0           | 0          | 0            | 11            |                                                      |          | WD        |          |          |          |          | WD        | WD                |
| B*35:01:31                                              | 35:01:31               | HLA07704  |                                               | 0          | 0           | 1             | 0            | 0           | 0          | 0            | 1             |                                                      |          |           |          |          |          |          |           |                   |
| B*35:01:34                                              | 35:01:34               | HLA08357  |                                               | 0          | 0           | 3             | 0            | 0           | 0          | 0            | 3             |                                                      |          |           |          |          |          |          |           |                   |
| B*35:01:38                                              | 35:01:38               | HLA09571  |                                               | 0          | 0           | 1             | 0            | 0           | 0          | 0            | 1             |                                                      |          |           |          |          |          |          |           |                   |
| B*35:01:42                                              | 35:01:42               | HLA11659  |                                               | 0          | 0           | 0             | 0            | 1           | 0          | 0            | 1             |                                                      |          |           |          |          |          |          |           |                   |
| B*35:01:44                                              | 35:01:44               | HLA12886  |                                               | 0          | 1           | 0             | 0            | 0           | 0          | 0            | 1             |                                                      |          |           |          |          |          |          |           |                   |
| <b>B*35:42 total</b>                                    | <b>35:42 total</b>     |           |                                               | <b>0</b>   | <b>0</b>    | <b>8</b>      | <b>2</b>     | <b>1</b>    | <b>0</b>   | <b>0</b>     | <b>11</b>     |                                                      |          | <b>WD</b> |          |          |          |          | <b>WD</b> | <b>WD</b>         |
| B*35:42:02                                              | 35:42:02               | HLA04675  |                                               | 0          | 0           | 3             | 0            | 0           | 0          | 0            | 3             |                                                      |          |           |          |          |          |          |           |                   |
| <b>B*35:02 total</b>                                    | <b>35:02 total</b>     |           |                                               | <b>663</b> | <b>3666</b> | <b>117316</b> | <b>10736</b> | <b>8816</b> | <b>743</b> | <b>23651</b> | <b>165591</b> | <b>C</b>                                             | <b>C</b> | <b>C</b>  | <b>C</b> | <b>C</b> | <b>C</b> | <b>C</b> | <b>C</b>  | <b>C</b>          |
| B*35:02                                                 | 35:02                  |           |                                               | 8          | 35          | 5753          | 443          | 227         | 15         | 514          | 6995          | WD                                                   | I        | C         | C        | C        | C        | C        | C         | C                 |
| B*35:02P                                                | 35:02P                 |           |                                               | 0          | 0           | 387           | 1            | 1           | 0          | 3            | 392           |                                                      |          | I         |          |          |          |          | I         | I                 |
| <b>B*35:02:01G total</b>                                | <b>35:02:01G total</b> |           |                                               | <b>655</b> | <b>3631</b> | <b>110640</b> | <b>10288</b> | <b>8585</b> | <b>728</b> | <b>23128</b> | <b>157655</b> | <b>C</b>                                             | <b>C</b> | <b>C</b>  | <b>C</b> | <b>C</b> | <b>C</b> | <b>C</b> | <b>C</b>  | <b>C</b>          |



| Supplemental Table 9: HLA-B Allele Summary <sup>a</sup> |                        |           | Allele Count by Population Group <sup>b</sup> |             |              |               |              |              |             |              |               | 3.0.0 CIWD Category by Population Group <sup>c</sup> |           |          |          |          |          |          |          |                   |          |
|---------------------------------------------------------|------------------------|-----------|-----------------------------------------------|-------------|--------------|---------------|--------------|--------------|-------------|--------------|---------------|------------------------------------------------------|-----------|----------|----------|----------|----------|----------|----------|-------------------|----------|
| Allele                                                  | Genomic typing         | Allele ID | G group                                       | AFA         | API          | EURO          | MENA         | HIS          | NAM         | UNK          | Total         | AFA                                                  | API       | EURO     | MENA     | HIS      | NAM      | UNK      | Total    | Highest Frequency |          |
| B*35:02:01G                                             | 35:02:01G              |           | 35:02:01G                                     | 405         | 2686         | 87353         | 8618         | 4701         | 384         | 18023        | 122170        | C                                                    | C         | C        | C        | C        | C        | C        | C        | C                 | C        |
| B*35:02:01                                              | 35:02:01               |           | 35:02:01G                                     | 250         | 945          | 23256         | 1670         | 3884         | 344         | 5105         | 35454         | C                                                    | C         | C        | C        | C        | C        | C        | C        | C                 | C        |
| B*35:02:01:01                                           | 35:02:01:01            | HLA00238  | 35:02:01G                                     | 0           | 0            | 1             | 0            | 0            | 0           | 0            | 1             |                                                      |           |          |          |          |          |          |          |                   |          |
| B*35:02:01:02                                           | 35:02:01:02            | HLA16279  | 35:02:01G                                     | 0           | 0            | 30            | 0            | 0            | 0           | 0            | 30            |                                                      |           | WD       |          |          |          |          | WD       | I                 | WD       |
| B*35:02:02                                              | 35:02:02               | HLA02143  |                                               | 0           | 0            | 535           | 4            | 2            | 0           | 6            | 547           |                                                      |           | I        |          |          |          | WD       | I        | I                 | I        |
| B*35:02:03                                              | 35:02:03               | HLA03476  |                                               | 0           | 0            | 1             | 0            | 1            | 0           | 0            | 2             |                                                      |           |          |          |          |          |          |          |                   |          |
| <b>B*35:03 total</b>                                    | <b>35:03 total</b>     |           |                                               | <b>1160</b> | <b>68091</b> | <b>258324</b> | <b>16431</b> | <b>10384</b> | <b>1097</b> | <b>22334</b> | <b>377821</b> | <b>C</b>                                             | <b>C</b>  | <b>C</b> | <b>C</b> | <b>C</b> | <b>C</b> | <b>C</b> | <b>C</b> | <b>C</b>          | <b>C</b> |
| B*35:03                                                 | 35:03                  |           |                                               | 1           | 9            | 1897          | 7            | 5            | 0           | 73           | 1992          |                                                      | WD        | C        | WD       | WD       |          |          | I        | C                 | C        |
| B*35:03P                                                | 35:03P                 |           |                                               | 0           | 2            | 480           | 2            | 0            | 0           | 0            | 484           |                                                      |           | I        |          |          |          |          | I        | I                 | I        |
| <b>B*35:03:01G total</b>                                | <b>35:03:01G total</b> |           |                                               | <b>1159</b> | <b>68069</b> | <b>255934</b> | <b>16420</b> | <b>10379</b> | <b>1097</b> | <b>22260</b> | <b>375318</b> | <b>C</b>                                             | <b>C</b>  | <b>C</b> | <b>C</b> | <b>C</b> | <b>C</b> | <b>C</b> | <b>C</b> | <b>C</b>          | <b>C</b> |
| B*35:03:01G                                             | 35:03:01G              |           | 35:03:01G                                     | 919         | 64102        | 246031        | 16049        | 7319         | 785         | 20513        | 355718        | C                                                    | C         | C        | C        | C        | C        | C        | C        | C                 | C        |
| B*35:03:01                                              | 35:03:01               |           | 35:03:01G                                     | 219         | 3786         | 9010          | 355          | 2877         | 293         | 1621         | 18161         | C                                                    | C         | C        | C        | C        | C        | C        | C        | C                 | C        |
| B*35:03:01:01                                           | 35:03:01:01            | HLA00239  | 35:03:01G                                     | 7           | 141          | 234           | 6            | 68           | 7           | 54           | 517           | WD                                                   | C         | I        | WD       | I        | C        | I        | I        | I                 | C        |
| B*35:03:01:02                                           | 35:03:01:02            | HLA15764  | 35:03:01G                                     | 0           | 0            | 0             | 0            | 0            | 0           | 1            | 1             |                                                      |           |          |          |          |          |          |          |                   |          |
| B*35:03:01:03                                           | 35:03:01:03            | HLA16280  | 35:03:01G                                     | 14          | 38           | 643           | 10           | 113          | 11          | 71           | 900           | WD                                                   | I         | I        | WD       | C        | C        | I        | I        | I                 | C        |
| B*35:03:01:05                                           | 35:03:01:05            | HLA16812  | 35:03:01G                                     | 0           | 0            | 16            | 0            | 2            | 0           | 0            | 18            |                                                      |           | WD       |          |          |          |          | WD       | I                 | WD       |
| B*35:279                                                | 35:279                 | HLA12877  | 35:03:01G                                     | 0           | 2            | 0             | 0            | 0            | 1           | 0            | 3             |                                                      |           |          |          |          |          |          |          |                   |          |
| B*35:03:02                                              | 35:03:02               | HLA03607  |                                               | 0           | 0            | 5             | 0            | 0            | 0           | 1            | 6             |                                                      |           | WD       |          |          |          |          | WD       | I                 | WD       |
| B*35:03:03                                              | 35:03:03               | HLA04437  |                                               | 0           | 1            | 1             | 0            | 0            | 0           | 0            | 2             |                                                      |           |          |          |          |          |          |          |                   |          |
| B*35:03:05                                              | 35:03:05               | HLA05491  |                                               | 0           | 0            | 1             | 1            | 0            | 0           | 0            | 2             |                                                      |           |          |          |          |          |          |          |                   |          |
| B*35:03:07                                              | 35:03:07               | HLA05841  |                                               | 0           | 0            | 1             | 0            | 0            | 0           | 0            | 1             |                                                      |           |          |          |          |          |          |          |                   |          |
| B*35:03:08                                              | 35:03:08               | HLA06148  |                                               | 0           | 0            | 1             | 1            | 0            | 0           | 0            | 2             |                                                      |           |          |          |          |          |          |          |                   |          |
| B*35:03:09                                              | 35:03:09               | HLA06220  |                                               | 0           | 2            | 1             | 0            | 0            | 0           | 0            | 3             |                                                      |           |          |          |          |          |          |          |                   |          |
| B*35:03:10                                              | 35:03:10               | HLA06961  |                                               | 0           | 5            | 0             | 0            | 0            | 0           | 0            | 5             |                                                      | WD        |          |          |          |          |          | WD       | I                 | WD       |
| B*35:03:11                                              | 35:03:11               | HLA07705  |                                               | 0           | 2            | 0             | 0            | 0            | 0           | 0            | 2             |                                                      |           |          |          |          |          |          |          |                   |          |
| B*35:03:12                                              | 35:03:12               | HLA08677  |                                               | 0           | 0            | 1             | 0            | 0            | 0           | 0            | 1             |                                                      |           |          |          |          |          |          |          |                   |          |
| B*35:03:15                                              | 35:03:15               | HLA11828  |                                               | 0           | 0            | 1             | 0            | 0            | 0           | 0            | 1             |                                                      |           |          |          |          |          |          |          |                   |          |
| B*35:03:20                                              | 35:03:20               | HLA12997  |                                               | 0           | 0            | 1             | 0            | 0            | 0           | 0            | 1             |                                                      |           |          |          |          |          |          |          |                   |          |
| B*35:03:21                                              | 35:03:21               | HLA13025  |                                               | 0           | 1            | 0             | 0            | 0            | 0           | 0            | 1             |                                                      |           |          |          |          |          |          |          |                   |          |
| <b>B*35:04 total</b>                                    | <b>35:04 total</b>     |           |                                               | <b>53</b>   | <b>10</b>    | <b>425</b>    | <b>2</b>     | <b>1378</b>  | <b>149</b>  | <b>697</b>   | <b>2714</b>   | <b>C</b>                                             | <b>WD</b> | <b>I</b> |          | <b>C</b> | <b>C</b> | <b>C</b> | <b>C</b> | <b>C</b>          | <b>C</b> |
| B*35:04                                                 | 35:04                  |           |                                               | 5           | 0            | 137           | 0            | 253          | 8           | 130          | 533           | WD                                                   |           | I        |          | C        | C        | I        | I        | I                 | C        |

| Supplemental Table 9: HLA-B Allele Summary <sup>a</sup> |                        |           | Allele Count by Population Group <sup>b</sup> |            |             |              |             |             |            |              |              | 3.0.0 CIWD Category by Population Group <sup>c</sup> |           |          |          |          |          |          |          |                   |
|---------------------------------------------------------|------------------------|-----------|-----------------------------------------------|------------|-------------|--------------|-------------|-------------|------------|--------------|--------------|------------------------------------------------------|-----------|----------|----------|----------|----------|----------|----------|-------------------|
| Allele                                                  | Genomic typing         | Allele ID | G group                                       | AFA        | API         | EURO         | MENA        | HIS         | NAM        | UNK          | Total        | AFA                                                  | API       | EURO     | MENA     | HIS      | NAM      | UNK      | Total    | Highest Frequency |
| B*35:04P                                                | 35:04P                 |           |                                               | 0          | 0           | 0            | 0           | 1           | 0          | 0            | 1            |                                                      |           |          |          |          |          |          |          |                   |
| B*35:04:01                                              | 35:04:01               | HLA00240  |                                               | 48         | 9           | 280          | 2           | 1043        | 136        | 540          | 2058         | C                                                    | WD        | I        |          | C        | C        | C        | C        | C                 |
| B*35:04:02                                              | 35:04:02               | HLA02260  |                                               | 0          | 1           | 8            | 0           | 81          | 5          | 27           | 122          |                                                      |           | WD       |          | C        | WD       | I        | WD       | C                 |
| <b>B*35:05 total</b>                                    | <b>35:05 total</b>     |           |                                               | <b>192</b> | <b>7838</b> | <b>1137</b>  | <b>71</b>   | <b>2448</b> | <b>158</b> | <b>3213</b>  | <b>15057</b> | <b>C</b>                                             | <b>C</b>  | <b>I</b> | <b>C</b> | <b>C</b> | <b>C</b> | <b>C</b> | <b>C</b> | <b>C</b>          |
| B*35:05                                                 | 35:05                  |           |                                               | 10         | 438         | 209          | 0           | 363         | 12         | 283          | 1315         | WD                                                   | C         | I        |          | C        | C        | C        | I        | C                 |
| <b>B*35:05:01G total</b>                                | <b>35:05:01G total</b> |           |                                               | <b>182</b> | <b>7396</b> | <b>928</b>   | <b>71</b>   | <b>2085</b> | <b>146</b> | <b>2930</b>  | <b>13738</b> | <b>C</b>                                             | <b>C</b>  | <b>I</b> | <b>C</b> | <b>C</b> | <b>C</b> | <b>C</b> | <b>C</b> | <b>C</b>          |
| B*35:05:01G                                             | 35:05:01G              |           | 35:05:01G                                     | 7          | 933         | 174          | 0           | 392         | 0          | 461          | 1967         | WD                                                   | C         | I        |          | C        |          | C        | C        | C                 |
| B*35:05:01                                              | 35:05:01               |           | 35:05:01G                                     | 175        | 6410        | 750          | 71          | 1667        | 144        | 2446         | 11663        | C                                                    | C         | I        | C        | C        | C        | C        | C        | C                 |
| B*35:05:01:01                                           | 35:05:01:01            | HLA00241  | 35:05:01G                                     | 0          | 52          | 0            | 0           | 2           | 0          | 18           | 72           |                                                      | I         |          |          |          |          | I        | WD       | I                 |
| B*35:05:01:02                                           | 35:05:01:02            | HLA16388  | 35:05:01G                                     | 0          | 1           | 4            | 0           | 20          | 1          | 5            | 31           |                                                      |           |          |          | I        |          | WD       | WD       | I                 |
| B*35:05:01:03                                           | 35:05:01:03            | HLA16813  | 35:05:01G                                     | 0          | 0           | 0            | 0           | 4           | 1          | 0            | 5            |                                                      |           |          |          |          |          |          | WD       | WD                |
| B*35:05:02                                              | 35:05:02               | HLA04820  |                                               | 0          | 4           | 0            | 0           | 0           | 0          | 0            | 4            |                                                      |           |          |          |          |          |          |          |                   |
| B*35:06                                                 | 35:06                  | HLA00242  |                                               | 6          | 2           | 99           | 0           | 273         | 29         | 175          | 584          | WD                                                   |           | WD       |          | C        | C        | C        | I        | C                 |
| <b>B*35:08 total</b>                                    | <b>35:08 total</b>     |           |                                               | <b>480</b> | <b>2156</b> | <b>63661</b> | <b>9691</b> | <b>4601</b> | <b>252</b> | <b>10528</b> | <b>91369</b> | <b>C</b>                                             | <b>C</b>  | <b>C</b> | <b>C</b> | <b>C</b> | <b>C</b> | <b>C</b> | <b>C</b> | <b>C</b>          |
| B*35:08                                                 | 35:08                  |           |                                               | 24         | 34          | 3767         | 530         | 490         | 14         | 371          | 5230         | WD                                                   | I         | C        | C        | C        | C        | C        | C        | C                 |
| B*35:08P                                                | 35:08P                 |           |                                               | 0          | 0           | 57           | 0           | 0           | 0          | 0            | 57           |                                                      |           | WD       |          |          |          |          | WD       | WD                |
| <b>B*35:08:01G total</b>                                | <b>35:08:01G total</b> |           |                                               | <b>456</b> | <b>2122</b> | <b>59814</b> | <b>9158</b> | <b>4109</b> | <b>238</b> | <b>10156</b> | <b>86053</b> | <b>C</b>                                             | <b>C</b>  | <b>C</b> | <b>C</b> | <b>C</b> | <b>C</b> | <b>C</b> | <b>C</b> | <b>C</b>          |
| B*35:08:01G                                             | 35:08:01G              |           | 35:08:01G                                     | 6          | 1052        | 3733         | 325         | 48          | 2          | 193          | 5359         | WD                                                   | C         | C        | C        | I        |          | C        | C        | C                 |
| B*35:08:01                                              | 35:08:01               |           | 35:08:01G                                     | 447        | 1064        | 55916        | 8813        | 4009        | 234        | 9937         | 80420        | C                                                    | C         | C        | C        | C        | C        | C        | C        | C                 |
| B*35:08:01:01                                           | 35:08:01:01            | HLA00244  | 35:08:01G                                     | 3          | 6           | 165          | 20          | 52          | 2          | 26           | 274          |                                                      | WD        | I        | WD       | I        |          | I        | I        | I                 |
| B*35:08:02                                              | 35:08:02               | HLA02506  |                                               | 0          | 0           | 15           | 0           | 1           | 0          | 1            | 17           |                                                      |           | WD       |          |          |          |          | WD       | WD                |
| B*35:08:03                                              | 35:08:03               | HLA03104  |                                               | 0          | 0           | 2            | 0           | 1           | 0          | 0            | 3            |                                                      |           |          |          |          |          |          |          |                   |
| B*35:08:05                                              | 35:08:05               | HLA07335  |                                               | 0          | 0           | 2            | 0           | 0           | 0          | 0            | 2            |                                                      |           |          |          |          |          |          |          |                   |
| B*35:08:07                                              | 35:08:07               | HLA11033  |                                               | 0          | 0           | 4            | 0           | 0           | 0          | 0            | 4            |                                                      |           |          |          |          |          |          |          |                   |
| B*35:08:08                                              | 35:08:08               | HLA12482  |                                               | 0          | 0           | 0            | 3           | 0           | 0          | 0            | 3            |                                                      |           |          |          |          |          |          |          |                   |
| <b>B*35:09 total</b>                                    | <b>35:09 total</b>     |           |                                               | <b>4</b>   | <b>10</b>   | <b>508</b>   | <b>1</b>    | <b>791</b>  | <b>17</b>  | <b>731</b>   | <b>2062</b>  |                                                      | <b>WD</b> | <b>I</b> |          | <b>C</b> | <b>C</b> | <b>C</b> | <b>C</b> | <b>C</b>          |
| B*35:09                                                 | 35:09                  |           |                                               | 0          | 0           | 146          | 0           | 137         | 1          | 122          | 406          |                                                      |           | I        |          | C        |          | I        | I        | C                 |
| B*35:09:01                                              | 35:09:01               | HLA00245  |                                               | 4          | 10          | 355          | 1           | 631         | 16         | 596          | 1613         |                                                      | WD        | I        |          | C        | C        | C        | C        | C                 |
| B*35:09:02                                              | 35:09:02               | HLA00246  |                                               | 0          | 0           | 7            | 0           | 19          | 0          | 12           | 38           |                                                      |           | WD       |          | I        |          | WD       | WD       | I                 |
| B*35:09:03                                              | 35:09:03               | HLA07178  |                                               | 0          | 0           | 0            | 0           | 4           | 0          | 1            | 5            |                                                      |           |          |          |          |          |          | WD       | WD                |
| B*35:10                                                 | 35:10                  | HLA00247  |                                               | 7          | 12          | 61           | 0           | 310         | 24         | 120          | 534          | WD                                                   | WD        | WD       |          | C        | C        | I        | I        | C                 |

| Supplemental Table 9: HLA-B Allele Summary <sup>a</sup> |                    |           | Allele Count by Population Group <sup>b</sup> |            |            |            |           |              |            |             |              | 3.0.0 CIWD Category by Population Group <sup>c</sup> |     |      |      |     |     |     |       |                   |
|---------------------------------------------------------|--------------------|-----------|-----------------------------------------------|------------|------------|------------|-----------|--------------|------------|-------------|--------------|------------------------------------------------------|-----|------|------|-----|-----|-----|-------|-------------------|
| Allele                                                  | Genomic typing     | Allele ID | G group                                       | AFA        | API        | EURO       | MENA      | HIS          | NAM        | UNK         | Total        | AFA                                                  | API | EURO | MENA | HIS | NAM | UNK | Total | Highest Frequency |
| <b>B*35:11 total</b>                                    | <b>35:11 total</b> |           |                                               | <b>33</b>  | <b>10</b>  | <b>53</b>  | <b>1</b>  | <b>196</b>   | <b>36</b>  | <b>68</b>   | <b>397</b>   | WD                                                   | WD  | WD   |      | C   | C   | I   | I     | C                 |
| B*35:11                                                 | 35:11              |           |                                               | 3          | 0          | 12         | 0         | 27           | 0          | 8           | 50           |                                                      |     | WD   |      | I   |     | WD  | WD    | I                 |
| B*35:11:01                                              | 35:11:01           | HLA00248  |                                               | 30         | 9          | 35         | 1         | 166          | 36         | 60          | 337          | WD                                                   | WD  | WD   |      | C   | C   | I   | I     | C                 |
| B*35:11:02                                              | 35:11:02           | HLA05273  |                                               | 0          | 1          | 4          | 0         | 0            | 0          | 0           | 5            |                                                      |     |      |      |     |     |     | WD    | WD                |
| B*35:11:03                                              | 35:11:03           | HLA08393  |                                               | 0          | 0          | 2          | 0         | 3            | 0          | 0           | 5            |                                                      |     |      |      |     |     |     | WD    | WD                |
| <b>B*35:12 total</b>                                    | <b>35:12 total</b> |           |                                               | <b>170</b> | <b>111</b> | <b>756</b> | <b>25</b> | <b>12232</b> | <b>844</b> | <b>1776</b> | <b>15914</b> | C                                                    | I   | I    | WD   | C   | C   | C   | C     | C                 |
| B*35:12                                                 | 35:12              |           |                                               | 11         | 5          | 102        | 2         | 1587         | 100        | 148         | 1955         | WD                                                   | WD  | WD   |      | C   | C   | C   | C     | C                 |
| B*35:12:01                                              | 35:12:01           | HLA00249  |                                               | 159        | 105        | 653        | 23        | 10640        | 744        | 1628        | 13952        | C                                                    | I   | I    | WD   | C   | C   | C   | C     | C                 |
| B*35:12:02                                              | 35:12:02           | HLA04183  |                                               | 0          | 1          | 0          | 0         | 0            | 0          | 0           | 1            |                                                      |     |      |      |     |     |     |       |                   |
| B*35:12:03                                              | 35:12:03           | HLA06647  |                                               | 0          | 0          | 0          | 0         | 5            | 0          | 0           | 5            |                                                      |     |      |      | WD  |     |     | WD    | WD                |
| B*35:12:04                                              | 35:12:04           | HLA16931  |                                               | 0          | 0          | 1          | 0         | 0            | 0          | 0           | 1            |                                                      |     |      |      |     |     |     |       |                   |
| B*35:13                                                 | 35:13              | HLA00250  |                                               | 0          | 84         | 3          | 6         | 1            | 0          | 1           | 95           |                                                      | I   |      | WD   |     |     |     | WD    | I                 |
| <b>B*35:14 total</b>                                    | <b>35:14 total</b> |           |                                               | <b>11</b>  | <b>19</b>  | <b>149</b> | <b>11</b> | <b>1885</b>  | <b>106</b> | <b>267</b>  | <b>2448</b>  | WD                                                   | I   | I    | WD   | C   | C   | C   | C     | C                 |
| B*35:14                                                 | 35:14              |           |                                               | 1          | 2          | 12         | 1         | 218          | 9          | 9           | 252          |                                                      |     | WD   |      | C   | C   | WD  | I     | C                 |
| B*35:14:01                                              | 35:14:01           | HLA00251  |                                               | 10         | 17         | 86         | 4         | 1667         | 97         | 252         | 2133         | WD                                                   | I   | WD   |      | C   | C   | C   | C     | C                 |
| B*35:14:02                                              | 35:14:02           | HLA01741  |                                               | 0          | 0          | 51         | 6         | 0            | 0          | 6           | 63           |                                                      |     | WD   | WD   |     |     | WD  | WD    | WD                |
| <b>B*35:15 total</b>                                    | <b>35:15 total</b> |           |                                               | <b>0</b>   | <b>17</b>  | <b>12</b>  | <b>0</b>  | <b>12</b>    | <b>2</b>   | <b>6</b>    | <b>49</b>    |                                                      | I   | WD   |      | I   |     | WD  | WD    | I                 |
| B*35:15                                                 | 35:15              |           |                                               | 0          | 6          | 4          | 0         | 6            | 1          | 1           | 18           |                                                      | WD  |      |      | WD  |     |     | WD    | WD                |
| B*35:15:01                                              | 35:15:01           | HLA00252  |                                               | 0          | 11         | 5          | 0         | 6            | 1          | 5           | 28           |                                                      | WD  | WD   |      | WD  |     | WD  | WD    | WD                |
| B*35:15:02                                              | 35:15:02           | HLA12238  |                                               | 0          | 0          | 3          | 0         | 0            | 0          | 0           | 3            |                                                      |     |      |      |     |     |     |       |                   |
| B*35:16                                                 | 35:16              | HLA00253  |                                               | 9          | 15         | 61         | 4         | 1113         | 46         | 140         | 1388         | WD                                                   | I   | WD   |      | C   | C   | C   | I     | C                 |
| <b>B*35:17 total</b>                                    | <b>35:17 total</b> |           |                                               | <b>82</b>  | <b>92</b>  | <b>566</b> | <b>33</b> | <b>9169</b>  | <b>518</b> | <b>1284</b> | <b>11744</b> | C                                                    | I   | I    | WD   | C   | C   | C   | C     | C                 |
| B*35:17                                                 | 35:17              |           |                                               | 37         | 44         | 393        | 10        | 3568         | 262        | 651         | 4965         | WD                                                   | I   | I    | WD   | C   | C   | C   | C     | C                 |
| B*35:17:01                                              | 35:17:01           | HLA00254  |                                               | 45         | 48         | 173        | 23        | 5598         | 256        | 633         | 6776         | C                                                    | I   | I    | WD   | C   | C   | C   | C     | C                 |
| B*35:17:02                                              | 35:17:02           | HLA10411  |                                               | 0          | 0          | 0          | 0         | 3            | 0          | 0           | 3            |                                                      |     |      |      |     |     |     |       |                   |
| B*35:18                                                 | 35:18              | HLA00255  |                                               | 0          | 0          | 16         | 0         | 14           | 0          | 20          | 50           |                                                      |     | WD   |      | I   |     | I   | WD    | I                 |
| B*35:19                                                 | 35:19              | HLA00256  |                                               | 0          | 0          | 501        | 0         | 575          | 7          | 753         | 1836         |                                                      |     | I    |      | C   | C   | C   | C     | C                 |
| <b>B*35:20 total</b>                                    | <b>35:20 total</b> |           |                                               | <b>34</b>  | <b>16</b>  | <b>337</b> | <b>1</b>  | <b>1145</b>  | <b>72</b>  | <b>496</b>  | <b>2101</b>  | WD                                                   | I   | I    |      | C   | C   | C   | C     | C                 |
| B*35:20                                                 | 35:20              |           |                                               | 3          | 1          | 90         | 0         | 173          | 10         | 60          | 337          |                                                      |     | WD   |      | C   | C   | I   | I     | C                 |
| B*35:20:01                                              | 35:20:01           | HLA00257  |                                               | 31         | 15         | 206        | 1         | 971          | 62         | 425         | 1711         | WD                                                   | I   | I    |      | C   | C   | C   | C     | C                 |
| B*35:20:02                                              | 35:20:02           | HLA03014  |                                               | 0          | 0          | 41         | 0         | 1            | 0          | 11          | 53           |                                                      |     | WD   |      |     |     | WD  | WD    | WD                |

| Supplemental Table 9: HLA-B Allele Summary <sup>a</sup> |                        |           | Allele Count by Population Group <sup>b</sup> |            |           |            |          |             |            |            |             | 3.0.0 CIWD Category by Population Group <sup>c</sup> |          |           |           |          |          |           |           |                   |
|---------------------------------------------------------|------------------------|-----------|-----------------------------------------------|------------|-----------|------------|----------|-------------|------------|------------|-------------|------------------------------------------------------|----------|-----------|-----------|----------|----------|-----------|-----------|-------------------|
| Allele                                                  | Genomic typing         | Allele ID | G group                                       | AFA        | API       | EURO       | MENA     | HIS         | NAM        | UNK        | Total       | AFA                                                  | API      | EURO      | MENA      | HIS      | NAM      | UNK       | Total     | Highest Frequency |
| B*35:21                                                 | 35:21                  | HLA00258  |                                               | 3          | 7         | 93         | 2        | 363         | 11         | 167        | 646         |                                                      | WD       | WD        |           | C        | C        | C         | I         | C                 |
| B*35:22                                                 | 35:22                  | HLA00259  |                                               | 5          | 4         | 43         | 2        | 231         | 12         | 77         | 374         | WD                                                   |          | WD        |           | C        | C        | I         | I         | C                 |
| B*35:23                                                 | 35:23                  | HLA00260  |                                               | 3          | 19        | 7          | 1        | 235         | 18         | 34         | 317         |                                                      | I        | WD        |           | C        | C        | I         | I         | C                 |
| <b>B*35:24 total</b>                                    | <b>35:24 total</b>     |           |                                               | <b>3</b>   | <b>2</b>  | <b>8</b>   | <b>0</b> | <b>189</b>  | <b>10</b>  | <b>21</b>  | <b>233</b>  |                                                      |          | <b>WD</b> |           | <b>C</b> | <b>C</b> | <b>I</b>  | <b>I</b>  | <b>C</b>          |
| B*35:24                                                 | 35:24                  |           |                                               | 0          | 0         | 0          | 0        | 29          | 1          | 2          | 32          |                                                      |          |           |           | I        |          |           | WD        | I                 |
| B*35:24:01                                              | 35:24:01               | HLA00261  |                                               | 2          | 2         | 8          | 0        | 152         | 8          | 18         | 190         |                                                      |          | WD        |           | C        | C        | I         | I         | C                 |
| B*35:24:02                                              | 35:24:02               | HLA04497  |                                               | 1          | 0         | 0          | 0        | 8           | 1          | 1          | 11          |                                                      |          |           |           | I        |          |           | WD        | I                 |
| B*35:25                                                 | 35:25                  | HLA00262  |                                               | 0          | 0         | 5          | 0        | 0           | 0          | 0          | 5           |                                                      |          | WD        |           |          |          |           | WD        | WD                |
| B*35:26                                                 | 35:26                  | HLA00263  |                                               | 0          | 1         | 0          | 0        | 23          | 3          | 2          | 29          |                                                      |          |           |           | I        |          |           | WD        | I                 |
| B*35:27                                                 | 35:27                  | HLA00264  |                                               | 3          | 1         | 125        | 1        | 4           | 1          | 15         | 150         |                                                      |          | I         |           |          |          | I         | WD        | I                 |
| B*35:28                                                 | 35:28                  | HLA00981  |                                               | 3          | 2         | 24         | 2        | 268         | 11         | 39         | 349         |                                                      |          | WD        |           | C        | C        | I         | I         | C                 |
| <b>B*35:29 total</b>                                    | <b>35:29 total</b>     |           |                                               | <b>3</b>   | <b>2</b>  | <b>181</b> | <b>0</b> | <b>1</b>    | <b>0</b>   | <b>6</b>   | <b>193</b>  |                                                      |          | <b>I</b>  |           |          |          | <b>WD</b> | <b>I</b>  | <b>I</b>          |
| B*35:29                                                 | 35:29                  |           |                                               | 3          | 0         | 22         | 0        | 0           | 0          | 1          | 26          |                                                      |          | WD        |           |          |          |           | WD        | WD                |
| B*35:29:01                                              | 35:29:01               | HLA00982  |                                               | 0          | 2         | 158        | 0        | 1           | 0          | 5          | 166         |                                                      |          | I         |           |          |          | WD        | I         | I                 |
| B*35:29:02                                              | 35:29:02               | HLA07454  |                                               | 0          | 0         | 1          | 0        | 0           | 0          | 0          | 1           |                                                      |          |           |           |          |          |           |           |                   |
| B*35:30                                                 | 35:30                  | HLA01057  |                                               | 1          | 261       | 38         | 3        | 137         | 8          | 66         | 514         |                                                      | C        | WD        |           | C        | C        | I         | I         | C                 |
| B*35:31                                                 | 35:31                  | HLA01058  |                                               | 1          | 3         | 29         | 1        | 160         | 9          | 33         | 236         |                                                      |          | WD        |           | C        | C        | I         | I         | C                 |
| <b>B*35:32 total</b>                                    | <b>35:32 total</b>     |           |                                               | <b>6</b>   | <b>0</b>  | <b>82</b>  | <b>0</b> | <b>4</b>    | <b>0</b>   | <b>10</b>  | <b>102</b>  | <b>WD</b>                                            |          | <b>WD</b> |           |          |          | <b>WD</b> | <b>WD</b> | <b>WD</b>         |
| B*35:32                                                 | 35:32                  |           |                                               | 2          | 0         | 15         | 0        | 1           | 0          | 1          | 19          |                                                      |          | WD        |           |          |          |           | WD        | WD                |
| B*35:32:01                                              | 35:32:01               | HLA01059  |                                               | 4          | 0         | 67         | 0        | 3           | 0          | 9          | 83          |                                                      |          | WD        |           |          |          | WD        | WD        | WD                |
| B*35:33                                                 | 35:33                  | HLA01060  |                                               | 0          | 0         | 5          | 0        | 0           | 0          | 0          | 5           |                                                      |          | WD        |           |          |          |           | WD        | WD                |
| B*35:34                                                 | 35:34                  | HLA01194  |                                               | 1          | 0         | 18         | 3        | 20          | 7          | 8          | 57          |                                                      |          | WD        |           | I        | C        | WD        | WD        | C                 |
| B*35:36                                                 | 35:36                  | HLA01296  |                                               | 0          | 1         | 132        | 27       | 0           | 0          | 0          | 160         |                                                      |          | I         | WD        |          |          |           | WD        | I                 |
| B*35:37                                                 | 35:37                  | HLA01314  |                                               | 0          | 8         | 31         | 0        | 0           | 0          | 1          | 40          |                                                      | WD       | WD        |           |          |          |           | WD        | WD                |
| B*35:38                                                 | 35:38                  | HLA01503  |                                               | 0          | 0         | 46         | 8        | 0           | 0          | 2          | 56          |                                                      |          | WD        | WD        |          |          |           | WD        | WD                |
| B*35:39                                                 | 35:39                  | HLA01509  |                                               | 0          | 0         | 0          | 0        | 2           | 0          | 0          | 2           |                                                      |          |           |           |          |          |           |           |                   |
| B*35:41                                                 | 35:41                  | HLA01563  |                                               | 16         | 3         | 758        | 1        | 14          | 5          | 119        | 916         | WD                                                   |          | I         |           | I        | WD       | I         | I         | I                 |
| <b>B*35:43 total</b>                                    | <b>35:43 total</b>     |           |                                               | <b>122</b> | <b>46</b> | <b>557</b> | <b>8</b> | <b>4968</b> | <b>364</b> | <b>977</b> | <b>7042</b> | <b>C</b>                                             | <b>I</b> | <b>I</b>  | <b>WD</b> | <b>C</b> | <b>C</b> | <b>C</b>  | <b>C</b>  | <b>C</b>          |
| <b>B*35:43:01G total</b>                                | <b>35:43:01G total</b> |           |                                               | <b>122</b> | <b>46</b> | <b>557</b> | <b>8</b> | <b>4968</b> | <b>364</b> | <b>977</b> | <b>7042</b> | <b>C</b>                                             | <b>I</b> | <b>I</b>  | <b>WD</b> | <b>C</b> | <b>C</b> | <b>C</b>  | <b>C</b>  | <b>C</b>          |
| B*35:43                                                 | 35:43                  |           | 35:43:01G                                     | 0          | 0         | 8          | 0        | 9           | 0          | 1          | 18          |                                                      |          | WD        |           | I        |          |           | WD        | I                 |
| B*35:43P                                                | 35:43P                 |           |                                               | 0          | 0         | 1          | 0        | 0           | 0          | 0          | 1           |                                                      |          |           |           |          |          |           |           |                   |

| Supplemental Table 9: HLA-B Allele Summary <sup>a</sup> |                    |           | Allele Count by Population Group <sup>b</sup> |          |          |           |          |           |          |          |           | 3.0.0 CIWD Category by Population Group <sup>c</sup> |     |           |      |           |     |           |           |                   |
|---------------------------------------------------------|--------------------|-----------|-----------------------------------------------|----------|----------|-----------|----------|-----------|----------|----------|-----------|------------------------------------------------------|-----|-----------|------|-----------|-----|-----------|-----------|-------------------|
| Allele                                                  | Genomic typing     | Allele ID | G group                                       | AFA      | API      | EURO      | MENA     | HIS       | NAM      | UNK      | Total     | AFA                                                  | API | EURO      | MENA | HIS       | NAM | UNK       | Total     | Highest Frequency |
| B*35:43:01G                                             | 35:43:01G          |           | 35:43:01G                                     | 84       | 30       | 515       | 5        | 3586      | 239      | 819      | 5278      | C                                                    | I   | I         | WD   | C         | C   | C         | C         | C                 |
| B*35:43:01                                              | 35:43:01           | HLA00185  | 35:43:01G                                     | 38       | 16       | 33        | 3        | 1369      | 125      | 157      | 1741      | WD                                                   | I   | WD        |      | C         | C   | C         | C         | C                 |
| B*35:79                                                 | 35:79              | HLA03008  | 35:43:01G                                     | 0        | 0        | 0         | 0        | 4         | 0        | 0        | 4         |                                                      |     |           |      |           |     |           |           |                   |
| B*35:44                                                 | 35:44              | HLA01182  |                                               | 1        | 0        | 2         | 0        | 28        | 0        | 3        | 34        |                                                      |     |           |      | I         |     |           | WD        | I                 |
| B*35:45                                                 | 35:45              | HLA01668  |                                               | 0        | 0        | 25        | 0        | 0         | 0        | 0        | 25        |                                                      |     | WD        |      |           |     |           | WD        | WD                |
| B*35:46                                                 | 35:46              | HLA01727  |                                               | 0        | 0        | 1         | 0        | 0         | 0        | 0        | 1         |                                                      |     |           |      |           |     |           |           |                   |
| B*35:47                                                 | 35:47              | HLA01846  |                                               | 1        | 0        | 4         | 0        | 20        | 3        | 3        | 31        |                                                      |     |           |      | I         |     |           | WD        | I                 |
| B*35:48                                                 | 35:48              | HLA01850  |                                               | 0        | 1        | 2         | 0        | 40        | 8        | 5        | 56        |                                                      |     |           |      | I         | C   | WD        | WD        | C                 |
| B*35:49                                                 | 35:49              | HLA01888  |                                               | 6        | 0        | 2         | 0        | 32        | 2        | 8        | 50        | WD                                                   |     |           |      | I         |     | WD        | WD        | I                 |
| B*35:50                                                 | 35:50              | HLA01896  |                                               | 0        | 0        | 1         | 0        | 0         | 0        | 0        | 1         |                                                      |     |           |      |           |     |           |           |                   |
| B*35:51                                                 | 35:51              | HLA01897  |                                               | 0        | 1        | 1         | 0        | 0         | 0        | 1        | 3         |                                                      |     |           |      |           |     |           |           |                   |
| B*35:55                                                 | 35:55              | HLA02031  |                                               | 1        | 0        | 120       | 0        | 22        | 3        | 58       | 204       |                                                      |     | I         |      | I         |     | I         | I         | I                 |
| B*35:58                                                 | 35:58              | HLA02128  |                                               | 0        | 0        | 0         | 0        | 3         | 0        | 2        | 5         |                                                      |     |           |      |           |     |           | WD        | WD                |
| <b>B*35:59 total</b>                                    | <b>35:59 total</b> |           |                                               | <b>6</b> | <b>0</b> | <b>1</b>  | <b>0</b> | <b>5</b>  | <b>3</b> | <b>5</b> | <b>20</b> | <b>WD</b>                                            |     |           |      | <b>WD</b> |     | <b>WD</b> | <b>WD</b> | <b>WD</b>         |
| B*35:59                                                 | 35:59              |           |                                               | 4        | 0        | 1         | 0        | 4         | 3        | 4        | 16        |                                                      |     |           |      |           |     |           | WD        | WD                |
| B*35:59:01                                              | 35:59:01           | HLA02134  |                                               | 2        | 0        | 0         | 0        | 1         | 0        | 1        | 4         |                                                      |     |           |      |           |     |           |           |                   |
| <b>B*35:61 total</b>                                    | <b>35:61 total</b> |           |                                               | <b>1</b> | <b>0</b> | <b>9</b>  | <b>0</b> | <b>0</b>  | <b>0</b> | <b>0</b> | <b>10</b> |                                                      |     | <b>WD</b> |      |           |     |           | <b>WD</b> | <b>WD</b>         |
| B*35:61                                                 | 35:61              |           |                                               | 0        | 0        | 5         | 0        | 0         | 0        | 0        | 5         |                                                      |     | WD        |      |           |     |           | WD        | WD                |
| B*35:61:01                                              | 35:61:01           | HLA02251  |                                               | 0        | 0        | 4         | 0        | 0         | 0        | 0        | 4         |                                                      |     |           |      |           |     |           |           |                   |
| B*35:61:02                                              | 35:61:02           | HLA08782  |                                               | 1        | 0        | 0         | 0        | 0         | 0        | 0        | 1         |                                                      |     |           |      |           |     |           |           |                   |
| B*35:62                                                 | 35:62              | HLA02385  |                                               | 0        | 0        | 0         | 0        | 0         | 0        | 2        | 2         |                                                      |     |           |      |           |     |           |           |                   |
| B*35:63                                                 | 35:63              | HLA02399  |                                               | 1        | 0        | 1         | 0        | 0         | 0        | 0        | 2         |                                                      |     |           |      |           |     |           |           |                   |
| <b>B*35:64 total</b>                                    | <b>35:64 total</b> |           |                                               | <b>0</b> | <b>0</b> | <b>1</b>  | <b>0</b> | <b>0</b>  | <b>0</b> | <b>0</b> | <b>1</b>  |                                                      |     |           |      |           |     |           |           |                   |
| B*35:64                                                 | 35:64              |           |                                               | 0        | 0        | 1         | 0        | 0         | 0        | 0        | 1         |                                                      |     |           |      |           |     |           |           |                   |
| B*35:65Q                                                | 35:65Q             | HLA02411  |                                               | 0        | 0        | 46        | 0        | 0         | 0        | 0        | 46        |                                                      |     | WD        |      |           |     |           | WD        | WD                |
| <b>B*35:68 total</b>                                    | <b>35:68 total</b> |           |                                               | <b>2</b> | <b>1</b> | <b>23</b> | <b>2</b> | <b>38</b> | <b>2</b> | <b>4</b> | <b>72</b> |                                                      |     | <b>WD</b> |      | <b>I</b>  |     |           | <b>WD</b> | <b>I</b>          |
| B*35:68                                                 | 35:68              |           |                                               | 0        | 0        | 2         | 0        | 8         | 0        | 0        | 10        |                                                      |     |           |      | I         |     |           | WD        | I                 |
| B*35:68:01                                              | 35:68:01           | HLA02645  |                                               | 1        | 1        | 16        | 2        | 0         | 0        | 0        | 20        |                                                      |     | WD        |      |           |     |           | WD        | WD                |
| B*35:68:02                                              | 35:68:02           | HLA03262  |                                               | 1        | 0        | 5         | 0        | 30        | 2        | 4        | 42        |                                                      |     | WD        |      | I         |     |           | WD        | I                 |
| B*35:72                                                 | 35:72              | HLA02763  |                                               | 0        | 7        | 2         | 0        | 0         | 0        | 0        | 9         | WD                                                   |     |           |      |           |     |           | WD        | WD                |
| B*35:74                                                 | 35:74              | HLA02810  |                                               | 0        | 4        | 3         | 0        | 0         | 0        | 0        | 7         |                                                      |     |           |      |           |     |           | WD        | WD                |

| Supplemental Table 9: HLA-B Allele Summary <sup>a</sup> |                     |           | Allele Count by Population Group <sup>b</sup> |          |          |          |          |          |          |          |           | 3.0.0 CIWD Category by Population Group <sup>c</sup> |     |      |      |     |     |     |           |                   |  |  |
|---------------------------------------------------------|---------------------|-----------|-----------------------------------------------|----------|----------|----------|----------|----------|----------|----------|-----------|------------------------------------------------------|-----|------|------|-----|-----|-----|-----------|-------------------|--|--|
| Allele                                                  | Genomic typing      | Allele ID | G group                                       | AFA      | API      | EURO     | MENA     | HIS      | NAM      | UNK      | Total     | AFA                                                  | API | EURO | MENA | HIS | NAM | UNK | Total     | Highest Frequency |  |  |
| B*35:77                                                 | 35:77               | HLA02977  |                                               | 0        | 1        | 103      | 2        | 3        | 0        | 21       | 130       |                                                      |     | WD   |      |     |     | I   | WD        | I                 |  |  |
| B*35:78                                                 | 35:78               | HLA03003  |                                               | 0        | 0        | 3        | 0        | 0        | 0        | 0        | 3         |                                                      |     |      |      |     |     |     |           |                   |  |  |
| B*35:80                                                 | 35:80               | HLA03078  |                                               | 0        | 0        | 7        | 0        | 1        | 0        | 3        | 11        |                                                      |     | WD   |      |     |     |     | WD        | WD                |  |  |
| B*35:81                                                 | 35:81               | HLA03084  |                                               | 0        | 0        | 11       | 0        | 0        | 0        | 1        | 12        |                                                      |     | WD   |      |     |     |     | WD        | WD                |  |  |
| B*35:82                                                 | 35:82               | HLA03125  |                                               | 0        | 0        | 0        | 0        | 1        | 0        | 1        | 2         |                                                      |     |      |      |     |     |     |           |                   |  |  |
| B*35:84                                                 | 35:84               | HLA03149  |                                               | 0        | 1        | 0        | 0        | 0        | 0        | 0        | 1         |                                                      |     |      |      |     |     |     |           |                   |  |  |
| B*35:85                                                 | 35:85               | HLA03169  |                                               | 0        | 1        | 0        | 0        | 0        | 0        | 0        | 1         |                                                      |     |      |      |     |     |     |           |                   |  |  |
| B*35:86                                                 | 35:86               | HLA03197  |                                               | 0        | 0        | 0        | 0        | 1        | 0        | 0        | 1         |                                                      |     |      |      |     |     |     |           |                   |  |  |
| B*35:87                                                 | 35:87               | HLA03198  |                                               | 0        | 0        | 5        | 0        | 0        | 0        | 2        | 7         |                                                      |     | WD   |      |     |     |     | WD        | WD                |  |  |
| B*35:90                                                 | 35:90               | HLA03321  |                                               | 0        | 0        | 4        | 0        | 3        | 0        | 2        | 9         |                                                      |     |      |      |     |     |     | WD        | WD                |  |  |
| B*35:91                                                 | 35:91               | HLA03324  |                                               | 0        | 1        | 0        | 0        | 0        | 0        | 0        | 1         |                                                      |     |      |      |     |     |     |           |                   |  |  |
| B*35:92                                                 | 35:92               | HLA03335  |                                               | 0        | 0        | 2        | 0        | 0        | 0        | 0        | 2         |                                                      |     |      |      |     |     |     |           |                   |  |  |
| B*35:93                                                 | 35:93               | HLA03336  |                                               | 0        | 1        | 12       | 0        | 0        | 0        | 0        | 13        |                                                      |     | WD   |      |     |     |     | WD        | WD                |  |  |
| B*35:95                                                 | 35:95               | HLA03625  |                                               | 0        | 0        | 12       | 0        | 1        | 0        | 0        | 13        |                                                      |     | WD   |      |     |     |     | WD        | WD                |  |  |
| B*35:96                                                 | 35:96               | HLA03662  |                                               | 0        | 0        | 5        | 0        | 0        | 0        | 0        | 5         |                                                      |     | WD   |      |     |     |     | WD        | WD                |  |  |
| B*35:97                                                 | 35:97               | HLA03644  |                                               | 0        | 1        | 0        | 0        | 0        | 0        | 0        | 1         |                                                      |     |      |      |     |     |     |           |                   |  |  |
| B*35:98                                                 | 35:98               | HLA03722  |                                               | 0        | 0        | 1        | 0        | 0        | 0        | 0        | 1         |                                                      |     |      |      |     |     |     |           |                   |  |  |
| B*35:99                                                 | 35:99               | HLA03715  |                                               | 0        | 0        | 1        | 0        | 2        | 0        | 0        | 3         |                                                      |     |      |      |     |     |     |           |                   |  |  |
| B*35:100                                                | 35:100              | HLA04900  |                                               | 0        | 0        | 23       | 0        | 1        | 0        | 1        | 25        |                                                      |     | WD   |      |     |     |     | WD        | WD                |  |  |
| <b>B*35:101 total</b>                                   | <b>35:101 total</b> |           |                                               | <b>0</b> | <b>0</b> | <b>1</b> | <b>0</b> | <b>0</b> | <b>0</b> | <b>0</b> | <b>1</b>  |                                                      |     |      |      |     |     |     |           |                   |  |  |
| B*35:101:01                                             | 35:101:01           | HLA04904  |                                               | 0        | 0        | 1        | 0        | 0        | 0        | 0        | 1         |                                                      |     |      |      |     |     |     |           |                   |  |  |
| B*35:102                                                | 35:102              | HLA04864  |                                               | 1        | 0        | 0        | 0        | 1        | 0        | 0        | 2         |                                                      |     |      |      |     |     |     |           |                   |  |  |
| B*35:103                                                | 35:103              | HLA04907  |                                               | 1        | 0        | 2        | 0        | 2        | 4        | 1        | 10        |                                                      |     |      |      |     |     |     | WD        | WD                |  |  |
| B*35:104                                                | 35:104              | HLA04910  |                                               | 0        | 0        | 10       | 0        | 0        | 0        | 0        | 10        |                                                      |     | WD   |      |     |     |     | WD        | WD                |  |  |
| B*35:105                                                | 35:105              | HLA04911  |                                               | 0        | 0        | 0        | 4        | 0        | 0        | 0        | 4         |                                                      |     |      |      |     |     |     |           |                   |  |  |
| B*35:106                                                | 35:106              | HLA04913  |                                               | 0        | 2        | 0        | 6        | 0        | 0        | 0        | 8         |                                                      |     |      | WD   |     |     |     | WD        | WD                |  |  |
| <b>B*35:108 total</b>                                   | <b>35:108 total</b> |           |                                               | <b>0</b> | <b>0</b> | <b>3</b> | <b>0</b> | <b>4</b> | <b>1</b> | <b>3</b> | <b>11</b> |                                                      |     |      |      |     |     |     | <b>WD</b> | <b>WD</b>         |  |  |
| B*35:108:01                                             | 35:108:01           | HLA04916  |                                               | 0        | 0        | 3        | 0        | 2        | 0        | 2        | 7         |                                                      |     |      |      |     |     |     | WD        | WD                |  |  |
| B*35:108:02                                             | 35:108:02           | HLA04921  |                                               | 0        | 0        | 0        | 0        | 2        | 1        | 1        | 4         |                                                      |     |      |      |     |     |     |           |                   |  |  |
| B*35:109                                                | 35:109              | HLA04919  |                                               | 0        | 26       | 2        | 0        | 0        | 0        | 0        | 28        |                                                      | I   |      |      |     |     |     | WD        | I                 |  |  |
| B*35:110                                                | 35:110              | HLA05063  |                                               | 0        | 0        | 1        | 0        | 0        | 0        | 0        | 1         |                                                      |     |      |      |     |     |     |           |                   |  |  |

| Supplemental Table 9: HLA-B Allele Summary <sup>a</sup> |                         |           | Allele Count by Population Group <sup>b</sup> |          |          |          |          |          |          |          |          | 3.0.0 CIWD Category by Population Group <sup>c</sup> |     |      |      |     |     |     |       |                   |  |
|---------------------------------------------------------|-------------------------|-----------|-----------------------------------------------|----------|----------|----------|----------|----------|----------|----------|----------|------------------------------------------------------|-----|------|------|-----|-----|-----|-------|-------------------|--|
| Allele                                                  | Genomic typing          | Allele ID | G group                                       | AFA      | API      | EURO     | MENA     | HIS      | NAM      | UNK      | Total    | AFA                                                  | API | EURO | MENA | HIS | NAM | UNK | Total | Highest Frequency |  |
| B*35:111                                                | 35:111                  | HLA04922  |                                               | 0        | 1        | 0        | 0        | 0        | 0        | 0        | 1        |                                                      |     |      |      |     |     |     |       |                   |  |
| B*35:112                                                | 35:112                  | HLA04923  |                                               | 0        | 0        | 6        | 0        | 0        | 0        | 0        | 6        |                                                      |     | WD   |      |     |     |     | WD    | WD                |  |
| B*35:113                                                | 35:113                  | HLA04882  |                                               | 0        | 0        | 0        | 0        | 2        | 0        | 2        | 4        |                                                      |     |      |      |     |     |     |       |                   |  |
| B*35:114                                                | 35:114                  | HLA04932  |                                               | 0        | 2        | 0        | 0        | 0        | 0        | 2        | 4        |                                                      |     |      |      |     |     |     |       |                   |  |
| B*35:115                                                | 35:115                  | HLA04936  |                                               | 0        | 0        | 7        | 1        | 0        | 0        | 1        | 9        |                                                      |     | WD   |      |     |     |     | WD    | WD                |  |
| B*35:116                                                | 35:116                  | HLA04938  |                                               | 1        | 0        | 4        | 0        | 23       | 3        | 13       | 44       |                                                      |     |      |      | I   |     | WD  | WD    | I                 |  |
| B*35:117                                                | 35:117                  | HLA04941  |                                               | 0        | 0        | 0        | 0        | 1        | 0        | 0        | 1        |                                                      |     |      |      |     |     |     |       |                   |  |
| B*35:119                                                | 35:119                  | HLA04946  |                                               | 1        | 0        | 2        | 0        | 0        | 0        | 0        | 3        |                                                      |     |      |      |     |     |     |       |                   |  |
| B*35:120                                                | 35:120                  | HLA04960  |                                               | 0        | 0        | 2        | 0        | 0        | 0        | 0        | 2        |                                                      |     |      |      |     |     |     |       |                   |  |
| B*35:121                                                | 35:121                  | HLA04961  |                                               | 0        | 0        | 0        | 0        | 17       | 3        | 2        | 22       |                                                      |     |      |      | I   |     |     | WD    | I                 |  |
| B*35:122                                                | 35:122                  | HLA04962  |                                               | 0        | 0        | 1        | 0        | 1        | 0        | 1        | 3        |                                                      |     |      |      |     |     |     |       |                   |  |
| B*35:123                                                | 35:123                  | HLA04963  |                                               | 0        | 0        | 1        | 0        | 4        | 0        | 0        | 5        |                                                      |     |      |      |     |     |     | WD    | WD                |  |
| B*35:124                                                | 35:124                  | HLA04965  |                                               | 0        | 0        | 1        | 0        | 0        | 0        | 1        | 2        |                                                      |     |      |      |     |     |     |       |                   |  |
| B*35:128                                                | 35:128                  | HLA04992  |                                               | 0        | 1        | 0        | 3        | 0        | 0        | 1        | 5        |                                                      |     |      |      |     |     |     | WD    | WD                |  |
| B*35:130N                                               | 35:130N                 | HLA04999  |                                               | 0        | 0        | 0        | 1        | 0        | 0        | 0        | 1        |                                                      |     |      |      |     |     |     |       |                   |  |
| B*35:132                                                | 35:132                  | HLA04867  |                                               | 0        | 37       | 0        | 0        | 0        | 0        | 2        | 39       |                                                      | I   |      |      |     |     |     | WD    | I                 |  |
| B*35:136                                                | 35:136                  | HLA04888  |                                               | 0        | 3        | 7        | 0        | 0        | 0        | 0        | 10       |                                                      |     | WD   |      |     |     |     | WD    | WD                |  |
| <b>B*35:137 total</b>                                   | <b>35:137 total</b>     |           |                                               | <b>0</b> | <b>2</b> | <b>1</b> | <b>0</b> | <b>0</b> | <b>0</b> | <b>0</b> | <b>3</b> |                                                      |     |      |      |     |     |     |       |                   |  |
| <b>B*35:137:01G total</b>                               | <b>35:137:01G total</b> |           |                                               | <b>0</b> | <b>2</b> | <b>1</b> | <b>0</b> | <b>0</b> | <b>0</b> | <b>0</b> | <b>3</b> |                                                      |     |      |      |     |     |     |       |                   |  |
| B*35:137:01G                                            | 35:137:01G              |           | 35:137:01G                                    | 0        | 2        | 1        | 0        | 0        | 0        | 0        | 3        |                                                      |     |      |      |     |     |     |       |                   |  |
| B*35:138                                                | 35:138                  | HLA05047  |                                               | 0        | 0        | 2        | 0        | 0        | 0        | 1        | 3        |                                                      |     |      |      |     |     |     |       |                   |  |
| B*35:139                                                | 35:139                  | HLA05051  |                                               | 0        | 1        | 4        | 0        | 0        | 0        | 0        | 5        |                                                      |     |      |      |     |     |     | WD    | WD                |  |
| B*35:143                                                | 35:143                  | HLA05060  |                                               | 0        | 0        | 1        | 0        | 0        | 0        | 0        | 1        |                                                      |     |      |      |     |     |     |       |                   |  |
| B*35:144                                                | 35:144                  | HLA05061  |                                               | 0        | 0        | 2        | 0        | 0        | 0        | 0        | 2        |                                                      |     |      |      |     |     |     |       |                   |  |
| B*35:148                                                | 35:148                  | HLA05826  |                                               | 0        | 0        | 2        | 0        | 0        | 0        | 1        | 3        |                                                      |     |      |      |     |     |     |       |                   |  |
| B*35:149                                                | 35:149                  | HLA05828  |                                               | 0        | 0        | 0        | 0        | 3        | 1        | 0        | 4        |                                                      |     |      |      |     |     |     |       |                   |  |
| B*35:152                                                | 35:152                  | HLA05955  |                                               | 0        | 0        | 1        | 0        | 0        | 0        | 0        | 1        |                                                      |     |      |      |     |     |     |       |                   |  |
| B*35:155                                                | 35:155                  | HLA06057  |                                               | 0        | 0        | 1        | 0        | 0        | 0        | 0        | 1        |                                                      |     |      |      |     |     |     |       |                   |  |
| B*35:156                                                | 35:156                  | HLA06134  |                                               | 0        | 1        | 0        | 1        | 0        | 0        | 0        | 2        |                                                      |     |      |      |     |     |     |       |                   |  |
| B*35:157                                                | 35:157                  | HLA06239  |                                               | 0        | 0        | 5        | 0        | 0        | 0        | 0        | 5        |                                                      |     | WD   |      |     |     |     | WD    | WD                |  |
| B*35:158                                                | 35:158                  | HLA06261  |                                               | 0        | 0        | 27       | 8        | 0        | 0        | 1        | 36       |                                                      |     | WD   | WD   |     |     |     | WD    | WD                |  |

| Supplemental Table 9: HLA-B Allele Summary <sup>a</sup> |                |           | Allele Count by Population Group <sup>b</sup> |     |     |      |      |     |     |     |       | 3.0.0 CIWD Category by Population Group <sup>c</sup> |     |      |      |     |     |     |       |                   |
|---------------------------------------------------------|----------------|-----------|-----------------------------------------------|-----|-----|------|------|-----|-----|-----|-------|------------------------------------------------------|-----|------|------|-----|-----|-----|-------|-------------------|
| Allele                                                  | Genomic typing | Allele ID | G group                                       | AFA | API | EURO | MENA | HIS | NAM | UNK | Total | AFA                                                  | API | EURO | MENA | HIS | NAM | UNK | Total | Highest Frequency |
| B*35:159                                                | 35:159         | HLA06266  |                                               | 0   | 1   | 2    | 0    | 1   | 0   | 0   | 4     |                                                      |     |      |      |     |     |     |       |                   |
| B*35:162                                                | 35:162         | HLA06574  |                                               | 0   | 0   | 1    | 0    | 0   | 0   | 0   | 1     |                                                      |     |      |      |     |     |     |       |                   |
| B*35:163                                                | 35:163         | HLA06648  |                                               | 0   | 0   | 5    | 0    | 0   | 0   | 0   | 5     |                                                      |     | WD   |      |     |     |     | WD    | WD                |
| B*35:165N                                               | 35:165N        | HLA06685  |                                               | 0   | 0   | 3    | 0    | 4   | 0   | 0   | 7     |                                                      |     |      |      |     |     |     | WD    | WD                |
| B*35:167                                                | 35:167         | HLA06815  |                                               | 0   | 11  | 5    | 0    | 0   | 0   | 0   | 16    | WD                                                   | WD  |      |      |     |     |     | WD    | WD                |
| B*35:169                                                | 35:169         | HLA06929  |                                               | 0   | 0   | 2    | 0    | 0   | 0   | 0   | 2     |                                                      |     |      |      |     |     |     |       |                   |
| B*35:170                                                | 35:170         | HLA06935  |                                               | 0   | 1   | 1    | 0    | 0   | 0   | 0   | 2     |                                                      |     |      |      |     |     |     |       |                   |
| B*35:171                                                | 35:171         | HLA06945  |                                               | 0   | 0   | 0    | 0    | 1   | 0   | 0   | 1     |                                                      |     |      |      |     |     |     |       |                   |
| B*35:174                                                | 35:174         | HLA06962  |                                               | 0   | 0   | 1    | 17   | 0   | 0   | 0   | 18    |                                                      |     |      | WD   |     |     |     | WD    | WD                |
| B*35:175                                                | 35:175         | HLA06964  |                                               | 0   | 0   | 0    | 0    | 1   | 0   | 1   | 2     |                                                      |     |      |      |     |     |     |       |                   |
| B*35:178                                                | 35:178         | HLA06999  |                                               | 0   | 1   | 4    | 0    | 2   | 0   | 2   | 9     |                                                      |     |      |      |     |     |     | WD    | WD                |
| B*35:180                                                | 35:180         | HLA07197  |                                               | 0   | 0   | 4    | 0    | 0   | 0   | 0   | 4     |                                                      |     |      |      |     |     |     |       |                   |
| B*35:182                                                | 35:182         | HLA07202  |                                               | 0   | 0   | 1    | 0    | 0   | 0   | 0   | 1     |                                                      |     |      |      |     |     |     |       |                   |
| B*35:183                                                | 35:183         | HLA07212  |                                               | 0   | 0   | 5    | 0    | 0   | 0   | 0   | 5     |                                                      |     | WD   |      |     |     |     | WD    | WD                |
| B*35:184                                                | 35:184         | HLA07302  |                                               | 0   | 0   | 2    | 0    | 0   | 0   | 0   | 2     |                                                      |     |      |      |     |     |     |       |                   |
| B*35:189                                                | 35:189         | HLA07560  |                                               | 0   | 1   | 0    | 0    | 0   | 0   | 0   | 1     |                                                      |     |      |      |     |     |     |       |                   |
| B*35:190                                                | 35:190         | HLA07645  |                                               | 0   | 0   | 0    | 0    | 1   | 0   | 0   | 1     |                                                      |     |      |      |     |     |     |       |                   |
| B*35:191                                                | 35:191         | HLA07646  |                                               | 0   | 0   | 1    | 0    | 0   | 0   | 6   | 7     |                                                      |     |      |      |     |     | WD  | WD    | WD                |
| B*35:192                                                | 35:192         | HLA07651  |                                               | 0   | 0   | 2    | 0    | 0   | 0   | 0   | 2     |                                                      |     |      |      |     |     |     |       |                   |
| B*35:193                                                | 35:193         | HLA07692  |                                               | 0   | 0   | 0    | 6    | 0   | 0   | 0   | 6     |                                                      |     |      | WD   |     |     |     | WD    | WD                |
| B*35:194                                                | 35:194         | HLA07701  |                                               | 0   | 0   | 3    | 0    | 0   | 0   | 0   | 3     |                                                      |     |      |      |     |     |     |       |                   |
| B*35:198                                                | 35:198         | HLA07769  |                                               | 0   | 0   | 1    | 0    | 0   | 0   | 0   | 1     |                                                      |     |      |      |     |     |     |       |                   |
| B*35:199                                                | 35:199         | HLA07780  |                                               | 0   | 0   | 1    | 0    | 0   | 0   | 0   | 1     |                                                      |     |      |      |     |     |     |       |                   |
| B*35:200                                                | 35:200         | HLA07796  |                                               | 0   | 0   | 1    | 0    | 0   | 0   | 1   | 2     |                                                      |     |      |      |     |     |     |       |                   |
| B*35:203                                                | 35:203         | HLA07939  |                                               | 0   | 0   | 3    | 0    | 0   | 0   | 0   | 3     |                                                      |     |      |      |     |     |     |       |                   |
| B*35:204                                                | 35:204         | HLA08062  |                                               | 0   | 0   | 12   | 0    | 0   | 0   | 0   | 12    |                                                      |     | WD   |      |     |     |     | WD    | WD                |
| B*35:206                                                | 35:206         | HLA08108  |                                               | 0   | 0   | 1    | 0    | 0   | 0   | 1   | 2     |                                                      |     |      |      |     |     |     |       |                   |
| B*35:208                                                | 35:208         | HLA08319  |                                               | 0   | 1   | 1    | 0    | 0   | 0   | 0   | 2     |                                                      |     |      |      |     |     |     |       |                   |
| B*35:210                                                | 35:210         | HLA08354  |                                               | 0   | 0   | 4    | 0    | 0   | 0   | 0   | 4     |                                                      |     |      |      |     |     |     |       |                   |
| B*35:211                                                | 35:211         | HLA08356  |                                               | 0   | 0   | 2    | 0    | 0   | 0   | 0   | 2     |                                                      |     |      |      |     |     |     |       |                   |
| B*35:212                                                | 35:212         | HLA08397  |                                               | 0   | 0   | 1    | 0    | 0   | 0   | 0   | 1     |                                                      |     |      |      |     |     |     |       |                   |



| Supplemental Table 9: HLA-B Allele Summary <sup>a</sup> |                |           | Allele Count by Population Group <sup>b</sup> |     |     |      |      |     |     |     |       | 3.0.0 CIWD Category by Population Group <sup>c</sup> |     |      |      |     |     |     |       |                   |
|---------------------------------------------------------|----------------|-----------|-----------------------------------------------|-----|-----|------|------|-----|-----|-----|-------|------------------------------------------------------|-----|------|------|-----|-----|-----|-------|-------------------|
| Allele                                                  | Genomic typing | Allele ID | G group                                       | AFA | API | EURO | MENA | HIS | NAM | UNK | Total | AFA                                                  | API | EURO | MENA | HIS | NAM | UNK | Total | Highest Frequency |
| B*35:214                                                | 35:214         | HLA08360  |                                               | 0   | 0   | 9    | 0    | 0   | 0   | 1   | 10    |                                                      |     | WD   |      |     |     |     | WD    | WD                |
| B*35:215                                                | 35:215         | HLA08361  |                                               | 0   | 2   | 0    | 0    | 0   | 0   | 0   | 2     |                                                      |     |      |      |     |     |     |       |                   |
| B*35:216N                                               | 35:216N        | HLA08362  |                                               | 0   | 0   | 1    | 0    | 1   | 0   | 0   | 2     |                                                      |     |      |      |     |     |     |       |                   |
| B*35:217                                                | 35:217         | HLA08499  |                                               | 0   | 0   | 1    | 0    | 0   | 0   | 0   | 1     |                                                      |     |      |      |     |     |     |       |                   |
| B*35:218                                                | 35:218         | HLA08507  |                                               | 0   | 0   | 3    | 0    | 0   | 0   | 0   | 3     |                                                      |     |      |      |     |     |     |       |                   |
| B*35:219                                                | 35:219         | HLA08785  |                                               | 0   | 0   | 0    | 1    | 1   | 0   | 0   | 2     |                                                      |     |      |      |     |     |     |       |                   |
| B*35:221                                                | 35:221         | HLA08990  |                                               | 0   | 0   | 3    | 0    | 0   | 0   | 1   | 4     |                                                      |     |      |      |     |     |     |       |                   |
| B*35:225                                                | 35:225         | HLA09003  |                                               | 0   | 0   | 1    | 1    | 1   | 0   | 3   | 6     |                                                      |     |      |      |     |     |     | WD    | WD                |
| B*35:228                                                | 35:228         | HLA09435  |                                               | 0   | 0   | 1    | 0    | 0   | 0   | 0   | 1     |                                                      |     |      |      |     |     |     |       |                   |
| B*35:232                                                | 35:232         | HLA09709  |                                               | 0   | 0   | 1    | 0    | 0   | 0   | 0   | 1     |                                                      |     |      |      |     |     |     |       |                   |
| B*35:233                                                | 35:233         | HLA09697  |                                               | 0   | 0   | 0    | 0    | 1   | 0   | 0   | 1     |                                                      |     |      |      |     |     |     |       |                   |
| B*35:234                                                | 35:234         | HLA09897  |                                               | 0   | 1   | 0    | 0    | 0   | 0   | 0   | 1     |                                                      |     |      |      |     |     |     |       |                   |
| B*35:235                                                | 35:235         | HLA09898  |                                               | 0   | 2   | 0    | 1    | 0   | 0   | 0   | 3     |                                                      |     |      |      |     |     |     |       |                   |
| B*35:236                                                | 35:236         | HLA09899  |                                               | 0   | 0   | 1    | 0    | 0   | 0   | 1   | 2     |                                                      |     |      |      |     |     |     |       |                   |
| B*35:237                                                | 35:237         | HLA09900  |                                               | 0   | 1   | 0    | 0    | 0   | 0   | 0   | 1     |                                                      |     |      |      |     |     |     |       |                   |
| B*35:238                                                | 35:238         | HLA09901  |                                               | 0   | 3   | 0    | 0    | 0   | 0   | 0   | 3     |                                                      |     |      |      |     |     |     |       |                   |
| B*35:239                                                | 35:239         | HLA09912  |                                               | 0   | 1   | 0    | 0    | 0   | 0   | 0   | 1     |                                                      |     |      |      |     |     |     |       |                   |
| B*35:240                                                | 35:240         | HLA09922  |                                               | 0   | 0   | 1    | 0    | 3   | 0   | 0   | 4     |                                                      |     |      |      |     |     |     |       |                   |
| B*35:242                                                | 35:242         | HLA10409  |                                               | 0   | 0   | 1    | 0    | 0   | 0   | 0   | 1     |                                                      |     |      |      |     |     |     |       |                   |
| B*35:243                                                | 35:243         | HLA10410  |                                               | 0   | 2   | 0    | 0    | 0   | 0   | 0   | 2     |                                                      |     |      |      |     |     |     |       |                   |
| B*35:247                                                | 35:247         | HLA10508  |                                               | 0   | 0   | 10   | 0    | 1   | 0   | 5   | 16    |                                                      |     | WD   |      |     |     | WD  | WD    | WD                |
| B*35:248                                                | 35:248         | HLA10516  |                                               | 0   | 0   | 2    | 0    | 0   | 0   | 1   | 3     |                                                      |     |      |      |     |     |     |       |                   |
| B*35:252                                                | 35:252         | HLA11027  |                                               | 0   | 0   | 1    | 0    | 0   | 0   | 0   | 1     |                                                      |     |      |      |     |     |     |       |                   |
| B*35:253                                                | 35:253         | HLA11326  |                                               | 0   | 0   | 0    | 0    | 0   | 0   | 1   | 1     |                                                      |     |      |      |     |     |     |       |                   |
| B*35:257                                                | 35:257         | HLA11826  |                                               | 0   | 0   | 1    | 0    | 0   | 0   | 0   | 1     |                                                      |     |      |      |     |     |     |       |                   |
| B*35:259                                                | 35:259         | HLA12008  |                                               | 0   | 0   | 3    | 0    | 0   | 0   | 2   | 5     |                                                      |     |      |      |     |     |     | WD    | WD                |
| B*35:260                                                | 35:260         | HLA12131  |                                               | 0   | 0   | 1    | 0    | 0   | 0   | 0   | 1     |                                                      |     |      |      |     |     |     |       |                   |
| B*35:262                                                | 35:262         | HLA12279  |                                               | 0   | 3   | 0    | 0    | 0   | 0   | 0   | 3     |                                                      |     |      |      |     |     |     |       |                   |
| B*35:263                                                | 35:263         | HLA12316  |                                               | 0   | 0   | 5    | 0    | 0   | 0   | 0   | 5     |                                                      |     | WD   |      |     |     |     | WD    | WD                |
| B*35:265                                                | 35:265         | HLA12428  |                                               | 0   | 0   | 0    | 0    | 1   | 0   | 0   | 1     |                                                      |     |      |      |     |     |     |       |                   |
| B*35:266                                                | 35:266         | HLA12479  |                                               | 0   | 0   | 0    | 0    | 1   | 0   | 0   | 1     |                                                      |     |      |      |     |     |     |       |                   |

| Supplemental Table 9: HLA-B Allele Summary <sup>a</sup> |                        |           | Allele Count by Population Group <sup>b</sup> |             |              |               |             |             |            |              |               | 3.0.0 CIWD Category by Population Group <sup>c</sup> |          |          |          |          |          |          |          |                   |
|---------------------------------------------------------|------------------------|-----------|-----------------------------------------------|-------------|--------------|---------------|-------------|-------------|------------|--------------|---------------|------------------------------------------------------|----------|----------|----------|----------|----------|----------|----------|-------------------|
| Allele                                                  | Genomic typing         | Allele ID | G group                                       | AFA         | API          | EURO          | MENA        | HIS         | NAM        | UNK          | Total         | AFA                                                  | API      | EURO     | MENA     | HIS      | NAM      | UNK      | Total    | Highest Frequency |
| B*35:268                                                | 35:268                 | HLA12565  |                                               | 0           | 0            | 1             | 0           | 0           | 0          | 0            | 1             |                                                      |          |          |          |          |          |          |          |                   |
| B*35:269                                                | 35:269                 | HLA12487  |                                               | 0           | 0            | 1             | 0           | 0           | 0          | 0            | 1             |                                                      |          |          |          |          |          |          |          |                   |
| B*35:274                                                | 35:274                 | HLA12747  |                                               | 0           | 0            | 3             | 0           | 1           | 0          | 0            | 4             |                                                      |          |          |          |          |          |          |          |                   |
| B*35:277                                                | 35:277                 | HLA12751  |                                               | 0           | 0            | 0             | 0           | 1           | 0          | 0            | 1             |                                                      |          |          |          |          |          |          |          |                   |
| B*35:278                                                | 35:278                 | HLA12757  |                                               | 0           | 0            | 8             | 0           | 0           | 0          | 0            | 8             |                                                      |          | WD       |          |          |          |          | WD       | WD                |
| B*35:280                                                | 35:280                 | HLA12976  |                                               | 0           | 2            | 0             | 0           | 0           | 0          | 0            | 2             |                                                      |          |          |          |          |          |          |          |                   |
| B*35:281                                                | 35:281                 | HLA12996  |                                               | 0           | 1            | 0             | 0           | 0           | 0          | 0            | 1             |                                                      |          |          |          |          |          |          |          |                   |
| B*35:282                                                | 35:282                 | HLA12998  |                                               | 0           | 0            | 1             | 0           | 0           | 0          | 0            | 1             |                                                      |          |          |          |          |          |          |          |                   |
| B*35:285                                                | 35:285                 | HLA13345  |                                               | 0           | 0            | 2             | 0           | 0           | 0          | 0            | 2             |                                                      |          |          |          |          |          |          |          |                   |
| B*35:287                                                | 35:287                 | HLA13476  |                                               | 0           | 0            | 0             | 0           | 0           | 1          | 0            | 1             |                                                      |          |          |          |          |          |          |          |                   |
| B*35:289                                                | 35:289                 | HLA13538  |                                               | 0           | 0            | 1             | 0           | 0           | 0          | 0            | 1             |                                                      |          |          |          |          |          |          |          |                   |
| B*35:294                                                | 35:294                 | HLA13657  |                                               | 0           | 0            | 2             | 0           | 0           | 0          | 0            | 2             |                                                      |          |          |          |          |          |          |          |                   |
| B*35:295                                                | 35:295                 | HLA13658  |                                               | 0           | 0            | 1             | 0           | 0           | 0          | 0            | 1             |                                                      |          |          |          |          |          |          |          |                   |
| B*35:306                                                | 35:306                 | HLA14201  |                                               | 0           | 0            | 0             | 2           | 0           | 0          | 0            | 2             |                                                      |          |          |          |          |          |          |          |                   |
| B*35:310                                                | 35:310                 | HLA14438  |                                               | 0           | 3            | 0             | 0           | 0           | 0          | 0            | 3             |                                                      |          |          |          |          |          |          |          |                   |
| B*35:311                                                | 35:311                 | HLA14443  |                                               | 0           | 0            | 2             | 0           | 0           | 0          | 0            | 2             |                                                      |          |          |          |          |          |          |          |                   |
| B*35:313                                                | 35:313                 | HLA14684  |                                               | 0           | 0            | 3             | 0           | 0           | 0          | 0            | 3             |                                                      |          |          |          |          |          |          |          |                   |
| B*35:315                                                | 35:315                 | HLA14931  |                                               | 0           | 1            | 0             | 0           | 0           | 0          | 0            | 1             |                                                      |          |          |          |          |          |          |          |                   |
| B*35:316                                                | 35:316                 | HLA14992  |                                               | 0           | 0            | 2             | 0           | 0           | 0          | 0            | 2             |                                                      |          |          |          |          |          |          |          |                   |
| B*35:317                                                | 35:317                 | HLA15262  |                                               | 0           | 1            | 0             | 0           | 0           | 0          | 0            | 1             |                                                      |          |          |          |          |          |          |          |                   |
| B*35:320                                                | 35:320                 | HLA15281  |                                               | 0           | 1            | 0             | 0           | 0           | 0          | 0            | 1             |                                                      |          |          |          |          |          |          |          |                   |
| B*35:321                                                | 35:321                 | HLA15292  |                                               | 0           | 0            | 6             | 0           | 2           | 0          | 13           | 21            |                                                      |          | WD       |          |          |          | WD       | WD       | WD                |
| B*35:324                                                | 35:324                 | HLA15549  |                                               | 0           | 0            | 0             | 0           | 0           | 0          | 1            | 1             |                                                      |          |          |          |          |          |          |          |                   |
| B*35:326                                                | 35:326                 | HLA15558  |                                               | 0           | 1            | 0             | 0           | 0           | 0          | 0            | 1             |                                                      |          |          |          |          |          |          |          |                   |
| B*35:337                                                | 35:337                 | HLA16888  |                                               | 0           | 0            | 0             | 0           | 0           | 0          | 1            | 1             |                                                      |          |          |          |          |          |          |          |                   |
| B*35:CODE                                               | 35:CODE                |           |                                               | 2275        | 2621         | 84017         | 2352        | 6628        | 530        | 8783         | 107206        | NA                                                   | NA       | NA       | NA       | NA       | NA       | NA       | NA       | NA                |
| <b>B*37:01 total</b>                                    | <b>37:01 total</b>     |           |                                               | <b>1997</b> | <b>36050</b> | <b>152001</b> | <b>4148</b> | <b>5157</b> | <b>543</b> | <b>15048</b> | <b>214944</b> | <b>C</b>                                             | <b>C</b> | <b>C</b> | <b>C</b> | <b>C</b> | <b>C</b> | <b>C</b> | <b>C</b> | <b>C</b>          |
| B*37:01                                                 | 37:01                  |           |                                               | 1           | 4            | 711           | 2           | 2           | 0          | 24           | 744           |                                                      |          | I        |          |          |          | I        | I        | I                 |
| B*37:01P                                                | 37:01P                 |           |                                               | 0           | 2            | 210           | 1           | 1           | 0          | 1            | 215           |                                                      |          | I        |          |          |          | I        | I        | I                 |
| <b>B*37:01:01G total</b>                                | <b>37:01:01G total</b> |           |                                               | <b>1995</b> | <b>35984</b> | <b>150984</b> | <b>4143</b> | <b>5154</b> | <b>541</b> | <b>15017</b> | <b>213818</b> | <b>C</b>                                             | <b>C</b> | <b>C</b> | <b>C</b> | <b>C</b> | <b>C</b> | <b>C</b> | <b>C</b> | <b>C</b>          |
| B*37:01:01G                                             | 37:01:01G              |           | 37:01:01G                                     | 1553        | 32682        | 140364        | 3959        | 3719        | 382        | 13442        | 196101        | C                                                    | C        | C        | C        | C        | C        | C        | C        | C                 |

| Supplemental Table 9: HLA-B Allele Summary <sup>a</sup> |                    |           | Allele Count by Population Group <sup>b</sup> |          |            |            |           |          |          |           |            | 3.0.0 CIWD Category by Population Group <sup>c</sup> |          |          |           |     |     |          |          |                   |
|---------------------------------------------------------|--------------------|-----------|-----------------------------------------------|----------|------------|------------|-----------|----------|----------|-----------|------------|------------------------------------------------------|----------|----------|-----------|-----|-----|----------|----------|-------------------|
| Allele                                                  | Genomic typing     | Allele ID | G group                                       | AFA      | API        | EURO       | MENA      | HIS      | NAM      | UNK       | Total      | AFA                                                  | API      | EURO     | MENA      | HIS | NAM | UNK      | Total    | Highest Frequency |
| B*37:01:01                                              | 37:01:01           |           | 37:01:01G                                     | 442      | 3302       | 10617      | 184       | 1435     | 159      | 1575      | 17714      | C                                                    | C        | C        | C         | C   | C   | C        | C        | C                 |
| B*37:01:01:01                                           | 37:01:01:01        | HLA00265  | 37:01:01G                                     | 0        | 0          | 3          | 0         | 0        | 0        | 0         | 3          |                                                      |          |          |           |     |     |          |          |                   |
| B*37:01:02                                              | 37:01:02           | HLA02418  |                                               | 0        | 0          | 5          | 0         | 0        | 0        | 0         | 5          |                                                      |          | WD       |           |     |     |          | WD       | WD                |
| B*37:01:03                                              | 37:01:03           | HLA02505  |                                               | 0        | 57         | 61         | 2         | 0        | 2        | 3         | 125        |                                                      | I        | WD       |           |     |     |          | WD       | I                 |
| B*37:01:06                                              | 37:01:06           | HLA03908  |                                               | 1        | 0          | 18         | 0         | 0        | 0        | 3         | 22         |                                                      |          | WD       |           |     |     |          | WD       | WD                |
| B*37:01:07                                              | 37:01:07           | HLA04184  |                                               | 0        | 0          | 6          | 0         | 0        | 0        | 0         | 6          |                                                      |          | WD       |           |     |     |          | WD       | WD                |
| B*37:01:08                                              | 37:01:08           | HLA06994  |                                               | 0        | 0          | 2          | 0         | 0        | 0        | 0         | 2          |                                                      |          |          |           |     |     |          |          |                   |
| B*37:01:09                                              | 37:01:09           | HLA08333  |                                               | 0        | 1          | 4          | 0         | 0        | 0        | 0         | 5          |                                                      |          |          |           |     |     |          | WD       | WD                |
| B*37:01:11                                              | 37:01:11           | HLA13467  |                                               | 0        | 2          | 0          | 0         | 0        | 0        | 0         | 2          |                                                      |          |          |           |     |     |          |          |                   |
| B*37:02                                                 | 37:02              | HLA00266  |                                               | 0        | 4          | 284        | 122       | 4        | 0        | 220       | 634        |                                                      |          | I        | C         |     |     | C        | I        | C                 |
| B*37:03N                                                | 37:03N             | HLA01267  |                                               | 0        | 2          | 21         | 2         | 2        | 0        | 2         | 29         |                                                      |          | WD       |           |     |     |          | WD       | WD                |
| <b>B*37:04 total</b>                                    | <b>37:04 total</b> |           |                                               | <b>0</b> | <b>162</b> | <b>194</b> | <b>15</b> | <b>4</b> | <b>1</b> | <b>61</b> | <b>437</b> |                                                      | <b>C</b> | <b>I</b> | <b>WD</b> |     |     | <b>I</b> | <b>I</b> | <b>C</b>          |
| B*37:04                                                 | 37:04              |           |                                               | 0        | 7          | 21         | 0         | 0        | 0        | 2         | 30         |                                                      | WD       | WD       |           |     |     |          | WD       | WD                |
| B*37:04:01                                              | 37:04:01           | HLA01346  |                                               | 0        | 63         | 173        | 15        | 4        | 1        | 56        | 312        |                                                      | I        | I        | WD        |     |     | I        | I        | I                 |
| B*37:04:02                                              | 37:04:02           | HLA04738  |                                               | 0        | 92         | 0          | 0         | 0        | 0        | 3         | 95         |                                                      | I        |          |           |     |     |          | WD       | I                 |
| B*37:05                                                 | 37:05              | HLA01359  |                                               | 0        | 10         | 2          | 0         | 0        | 0        | 0         | 12         |                                                      | WD       |          |           |     |     |          | WD       | WD                |
| <b>B*37:06 total</b>                                    | <b>37:06 total</b> |           |                                               | <b>0</b> | <b>0</b>   | <b>4</b>   | <b>0</b>  | <b>0</b> | <b>0</b> | <b>0</b>  | <b>4</b>   |                                                      |          |          |           |     |     |          |          |                   |
| B*37:06                                                 | 37:06              |           |                                               | 0        | 0          | 2          | 0         | 0        | 0        | 0         | 2          |                                                      |          |          |           |     |     |          |          |                   |
| B*37:06:01                                              | 37:06:01           | HLA01949  |                                               | 0        | 0          | 2          | 0         | 0        | 0        | 0         | 2          |                                                      |          |          |           |     |     |          |          |                   |
| B*37:07                                                 | 37:07              | HLA02007  |                                               | 0        | 1          | 28         | 0         | 1        | 0        | 2         | 32         |                                                      |          | WD       |           |     |     |          | WD       | WD                |
| B*37:09                                                 | 37:09              | HLA02149  |                                               | 0        | 0          | 4          | 2         | 0        | 0        | 0         | 6          |                                                      |          |          |           |     |     |          | WD       | WD                |
| B*37:10                                                 | 37:10              | HLA02231  |                                               | 0        | 0          | 7          | 0         | 1        | 0        | 0         | 8          |                                                      |          | WD       |           |     |     |          | WD       | WD                |
| B*37:11                                                 | 37:11              | HLA02479  |                                               | 0        | 3          | 1          | 0         | 0        | 0        | 0         | 4          |                                                      |          |          |           |     |     |          |          |                   |
| B*37:16Q                                                | 37:16Q             | HLA04073  |                                               | 0        | 0          | 5          | 0         | 0        | 0        | 0         | 5          |                                                      |          | WD       |           |     |     |          | WD       | WD                |
| B*37:17                                                 | 37:17              | HLA04208  |                                               | 0        | 0          | 20         | 0         | 1        | 0        | 1         | 22         |                                                      |          | WD       |           |     |     |          | WD       | WD                |
| B*37:18                                                 | 37:18              | HLA04229  |                                               | 0        | 1          | 3          | 0         | 0        | 0        | 1         | 5          |                                                      |          |          |           |     |     |          | WD       | WD                |
| <b>B*37:19 total</b>                                    | <b>37:19 total</b> |           |                                               | <b>0</b> | <b>1</b>   | <b>1</b>   | <b>0</b>  | <b>0</b> | <b>0</b> | <b>0</b>  | <b>2</b>   |                                                      |          |          |           |     |     |          |          |                   |
| B*37:19                                                 | 37:19              |           |                                               | 0        | 0          | 1          | 0         | 0        | 0        | 0         | 1          |                                                      |          |          |           |     |     |          |          |                   |
| B*37:19:02                                              | 37:19:02           | HLA13967  |                                               | 0        | 1          | 0          | 0         | 0        | 0        | 0         | 1          |                                                      |          |          |           |     |     |          |          |                   |
| B*37:21                                                 | 37:21              | HLA04539  |                                               | 0        | 0          | 14         | 0         | 0        | 0        | 0         | 14         |                                                      |          | WD       |           |     |     |          | WD       | WD                |
| B*37:22                                                 | 37:22              | HLA04692  |                                               | 0        | 5          | 0          | 0         | 0        | 0        | 0         | 5          |                                                      | WD       |          |           |     |     |          | WD       | WD                |

| Supplemental Table 9: HLA-B Allele Summary <sup>a</sup> |                        |           | Allele Count by Population Group <sup>b</sup> |             |              |               |              |              |             |              |               | 3.0.0 CIWD Category by Population Group <sup>c</sup> |          |          |          |          |          |          |          |                   |
|---------------------------------------------------------|------------------------|-----------|-----------------------------------------------|-------------|--------------|---------------|--------------|--------------|-------------|--------------|---------------|------------------------------------------------------|----------|----------|----------|----------|----------|----------|----------|-------------------|
| Allele                                                  | Genomic typing         | Allele ID | G group                                       | AFA         | API          | EURO          | MENA         | HIS          | NAM         | UNK          | Total         | AFA                                                  | API      | EURO     | MENA     | HIS      | NAM      | UNK      | Total    | Highest Frequency |
| B*37:24                                                 | 37:24                  | HLA05487  |                                               | 0           | 0            | 4             | 0            | 0            | 0           | 0            | 4             |                                                      |          |          |          |          |          |          |          |                   |
| B*37:25                                                 | 37:25                  | HLA05719  |                                               | 0           | 1            | 0             | 0            | 0            | 0           | 0            | 1             |                                                      |          |          |          |          |          |          |          |                   |
| B*37:27                                                 | 37:27                  | HLA06231  |                                               | 0           | 0            | 4             | 0            | 0            | 0           | 1            | 5             |                                                      |          |          |          |          |          |          | WD       | WD                |
| B*37:33N                                                | 37:33N                 | HLA07690  |                                               | 0           | 0            | 2             | 0            | 0            | 0           | 0            | 2             |                                                      |          |          |          |          |          |          |          |                   |
| B*37:34                                                 | 37:34                  | HLA07931  |                                               | 0           | 2            | 0             | 0            | 0            | 0           | 0            | 2             |                                                      |          |          |          |          |          |          |          |                   |
| B*37:35                                                 | 37:35                  | HLA08334  |                                               | 0           | 9            | 0             | 0            | 0            | 0           | 0            | 9             |                                                      | WD       |          |          |          |          |          | WD       | WD                |
| B*37:39                                                 | 37:39                  | HLA09887  |                                               | 0           | 1            | 0             | 0            | 0            | 0           | 0            | 1             |                                                      |          |          |          |          |          |          |          |                   |
| B*37:42N                                                | 37:42N                 | HLA10124  |                                               | 0           | 0            | 5             | 0            | 0            | 0           | 1            | 6             |                                                      |          | WD       |          |          |          |          | WD       | WD                |
| B*37:44                                                 | 37:44                  | HLA10647  |                                               | 0           | 0            | 1             | 0            | 0            | 0           | 0            | 1             |                                                      |          |          |          |          |          |          |          |                   |
| B*37:48                                                 | 37:48                  | HLA11228  |                                               | 0           | 7            | 0             | 0            | 0            | 0           | 0            | 7             |                                                      | WD       |          |          |          |          |          | WD       | WD                |
| B*37:49                                                 | 37:49                  | HLA11420  |                                               | 0           | 2            | 0             | 0            | 0            | 0           | 0            | 2             |                                                      |          |          |          |          |          |          |          |                   |
| B*37:52                                                 | 37:52                  | HLA12175  |                                               | 0           | 1            | 3             | 0            | 0            | 0           | 0            | 4             |                                                      |          |          |          |          |          |          |          |                   |
| B*37:54                                                 | 37:54                  | HLA12660  |                                               | 0           | 4            | 0             | 0            | 0            | 0           | 0            | 4             |                                                      |          |          |          |          |          |          |          |                   |
| B*37:65                                                 | 37:65                  | HLA16473  |                                               | 0           | 4            | 0             | 0            | 0            | 0           | 0            | 4             |                                                      |          |          |          |          |          |          |          |                   |
| B*37:CODE                                               | 37:CODE                |           |                                               | 79          | 281          | 5617          | 71           | 263          | 20          | 564          | 6895          | NA                                                   | NA       | NA       | NA       | NA       | NA       | NA       | NA       | NA                |
| <b>B*38:01 total</b>                                    | <b>38:01 total</b>     |           |                                               | <b>1247</b> | <b>3179</b>  | <b>282636</b> | <b>15893</b> | <b>12745</b> | <b>1004</b> | <b>40830</b> | <b>357534</b> | <b>C</b>                                             | <b>C</b> | <b>C</b> | <b>C</b> | <b>C</b> | <b>C</b> | <b>C</b> | <b>C</b> | <b>C</b>          |
| B*38:01                                                 | 38:01                  |           |                                               | 62          | 112          | 13986         | 855          | 1295         | 77          | 1241         | 17628         | C                                                    | I        | C        | C        | C        | C        | C        | C        | C                 |
| B*38:01P                                                | 38:01P                 |           |                                               | 0           | 0            | 143           | 2            | 0            | 0           | 0            | 145           |                                                      |          | I        |          |          |          |          | WD       | I                 |
| <b>B*38:01:01G total</b>                                | <b>38:01:01G total</b> |           |                                               | <b>1185</b> | <b>3067</b>  | <b>268482</b> | <b>15029</b> | <b>11449</b> | <b>927</b>  | <b>39581</b> | <b>339720</b> | <b>C</b>                                             | <b>C</b> | <b>C</b> | <b>C</b> | <b>C</b> | <b>C</b> | <b>C</b> | <b>C</b> | <b>C</b>          |
| B*38:01:01G                                             | 38:01:01G              |           | 38:01:01G                                     | 20          | 92           | 14120         | 505          | 150          | 2           | 208          | 15097         | WD                                                   | I        | C        | C        | C        |          | C        | C        | C                 |
| B*38:01:01                                              | 38:01:01               |           | 38:01:01G                                     | 1165        | 2975         | 254360        | 14524        | 11299        | 925         | 39373        | 324621        | C                                                    | C        | C        | C        | C        | C        | C        | C        | C                 |
| B*38:01:01:01                                           | 38:01:01:01            | HLA00267  | 38:01:01G                                     | 0           | 0            | 2             | 0            | 0            | 0           | 0            | 2             |                                                      |          |          |          |          |          |          |          |                   |
| B*38:01:02                                              | 38:01:02               | HLA02477  |                                               | 0           | 0            | 2             | 0            | 0            | 0           | 0            | 2             |                                                      |          |          |          |          |          |          |          |                   |
| B*38:01:03                                              | 38:01:03               | HLA04090  |                                               | 0           | 0            | 2             | 0            | 0            | 0           | 0            | 2             |                                                      |          |          |          |          |          |          |          |                   |
| B*38:01:04                                              | 38:01:04               | HLA04217  |                                               | 0           | 0            | 3             | 6            | 1            | 0           | 7            | 17            |                                                      |          |          | WD       |          |          | WD       | WD       | WD                |
| B*38:01:05                                              | 38:01:05               | HLA05962  |                                               | 0           | 0            | 0             | 0            | 0            | 0           | 1            | 1             |                                                      |          |          |          |          |          |          |          |                   |
| B*38:01:06                                              | 38:01:06               | HLA07471  |                                               | 0           | 0            | 16            | 0            | 0            | 0           | 0            | 16            |                                                      |          | WD       |          |          |          |          | WD       | WD                |
| B*38:01:07                                              | 38:01:07               | HLA07727  |                                               | 0           | 0            | 0             | 1            | 0            | 0           | 0            | 1             |                                                      |          |          |          |          |          |          |          |                   |
| B*38:01:08                                              | 38:01:08               | HLA13349  |                                               | 0           | 0            | 2             | 0            | 0            | 0           | 0            | 2             |                                                      |          |          |          |          |          |          |          |                   |
| <b>B*38:02 total</b>                                    | <b>38:02 total</b>     |           |                                               | <b>44</b>   | <b>23374</b> | <b>713</b>    | <b>137</b>   | <b>178</b>   | <b>34</b>   | <b>3068</b>  | <b>27548</b>  | <b>C</b>                                             | <b>C</b> | <b>I</b> | <b>C</b> | <b>C</b> | <b>C</b> | <b>C</b> | <b>C</b> | <b>C</b>          |
| B*38:02                                                 | 38:02                  |           |                                               | 1           | 73           | 16            | 0            | 1            | 0           | 17           | 108           |                                                      | I        | WD       |          |          |          | I        | WD       | I                 |

| Supplemental Table 9: HLA-B Allele Summary <sup>a</sup> |                        |           | Allele Count by Population Group <sup>b</sup> |           |              |            |            |            |           |             |              | 3.0.0 CIWD Category by Population Group <sup>c</sup> |          |          |          |          |          |          |          |                   |    |
|---------------------------------------------------------|------------------------|-----------|-----------------------------------------------|-----------|--------------|------------|------------|------------|-----------|-------------|--------------|------------------------------------------------------|----------|----------|----------|----------|----------|----------|----------|-------------------|----|
| Allele                                                  | Genomic typing         | Allele ID | G group                                       | AFA       | API          | EURO       | MENA       | HIS        | NAM       | UNK         | Total        | AFA                                                  | API      | EURO     | MENA     | HIS      | NAM      | UNK      | Total    | Highest Frequency |    |
| B*38:02P                                                | 38:02P                 |           |                                               | 0         | 0            | 1          | 0          | 0          | 0         | 0           | 1            |                                                      |          |          |          |          |          |          |          |                   |    |
| <b>B*38:02:01G total</b>                                | <b>38:02:01G total</b> |           |                                               | <b>42</b> | <b>22245</b> | <b>643</b> | <b>136</b> | <b>159</b> | <b>33</b> | <b>2716</b> | <b>25974</b> | <b>C</b>                                             | <b>C</b> | <b>I</b> | <b>C</b> | <b>C</b> | <b>C</b> | <b>C</b> | <b>C</b> | <b>C</b>          |    |
| B*38:02:01G                                             | 38:02:01G              |           | 38:02:01G                                     | 33        | 18183        | 614        | 122        | 114        | 23        | 1952        | 21041        | WD                                                   | C        | I        | C        | C        | C        | C        | C        | C                 |    |
| B*38:02:01                                              | 38:02:01               | HLA00268  | 38:02:01G                                     | 9         | 4062         | 29         | 14         | 45         | 10        | 764         | 4933         | WD                                                   | C        | WD       | WD       | I        | C        | C        | C        | C                 |    |
| B*38:02:02                                              | 38:02:02               | HLA00269  |                                               | 1         | 1056         | 53         | 1          | 18         | 1         | 335         | 1465         |                                                      | C        | WD       |          | I        |          | C        | I        | C                 |    |
| B*38:03                                                 | 38:03                  | HLA00270  |                                               | 0         | 2            | 8          | 0          | 9          | 0         | 3           | 22           |                                                      |          | WD       |          | I        |          |          | WD       | I                 |    |
| B*38:04                                                 | 38:04                  | HLA01137  |                                               | 0         | 2            | 1          | 0          | 0          | 0         | 1           | 4            |                                                      |          |          |          |          |          |          |          |                   |    |
| B*38:06                                                 | 38:06                  | HLA01265  |                                               | 2         | 0            | 2          | 0          | 1          | 3         | 2           | 10           |                                                      |          |          |          |          |          |          | WD       | WD                |    |
| B*38:08                                                 | 38:08                  | HLA01515  |                                               | 0         | 0            | 1          | 0          | 0          | 0         | 0           | 1            |                                                      |          |          |          |          |          |          |          |                   |    |
| B*38:09                                                 | 38:09                  | HLA01655  |                                               | 1         | 2            | 388        | 2          | 5          | 0         | 151         | 549          |                                                      |          | I        |          | WD       |          | C        | I        | C                 |    |
| B*38:12                                                 | 38:12                  | HLA02394  |                                               | 0         | 0            | 27         | 5          | 1          | 0         | 3           | 36           |                                                      |          | WD       | WD       |          |          |          | WD       | WD                |    |
| B*38:13                                                 | 38:13                  | HLA02504  |                                               | 0         | 1            | 26         | 1          | 0          | 0         | 0           | 28           |                                                      |          | WD       |          |          |          |          | WD       | WD                |    |
| B*38:14                                                 | 38:14                  | HLA02584  |                                               | 0         | 1            | 11         | 0          | 0          | 0         | 17          | 29           |                                                      |          | WD       |          |          |          | I        | WD       | I                 |    |
| B*38:15                                                 | 38:15                  | HLA02714  |                                               | 0         | 11           | 0          | 0          | 0          | 0         | 2           | 13           |                                                      | WD       |          |          |          |          |          | WD       | WD                |    |
| B*38:17                                                 | 38:17                  | HLA03051  |                                               | 1         | 0            | 3          | 0          | 0          | 0         | 1           | 5            |                                                      |          |          |          |          |          |          | WD       | WD                |    |
| B*38:19                                                 | 38:19                  | HLA03694  |                                               | 0         | 0            | 1          | 0          | 0          | 0         | 3           | 4            |                                                      |          |          |          |          |          |          |          |                   |    |
| B*38:24                                                 | 38:24                  | HLA05519  |                                               | 0         | 0            | 11         | 0          | 1          | 0         | 16          | 28           |                                                      |          | WD       |          |          |          | I        | WD       | I                 |    |
| B*38:25                                                 | 38:25                  | HLA05712  |                                               | 0         | 0            | 1          | 0          | 0          | 0         | 0           | 1            |                                                      |          |          |          |          |          |          |          |                   |    |
| B*38:27                                                 | 38:27                  | HLA06242  |                                               | 0         | 0            | 2          | 0          | 0          | 0         | 10          | 12           |                                                      |          |          |          |          |          |          | WD       | WD                | WD |
| B*38:28                                                 | 38:28                  | HLA06316  |                                               | 0         | 0            | 1          | 0          | 0          | 0         | 0           | 1            |                                                      |          |          |          |          |          |          |          |                   |    |
| B*38:29                                                 | 38:29                  | HLA06326  |                                               | 0         | 2            | 1          | 0          | 0          | 0         | 0           | 3            |                                                      |          |          |          |          |          |          |          |                   |    |
| B*38:31                                                 | 38:31                  | HLA06692  |                                               | 0         | 0            | 22         | 0          | 0          | 0         | 1           | 23           |                                                      |          | WD       |          |          |          |          | WD       | WD                |    |
| B*38:32                                                 | 38:32                  | HLA06830  |                                               | 0         | 0            | 6          | 0          | 0          | 0         | 0           | 6            |                                                      |          | WD       |          |          |          |          | WD       | WD                |    |
| B*38:33                                                 | 38:33                  | HLA06834  |                                               | 0         | 0            | 2          | 0          | 0          | 0         | 0           | 2            |                                                      |          |          |          |          |          |          |          |                   |    |
| B*38:35                                                 | 38:35                  | HLA06991  |                                               | 0         | 13           | 0          | 0          | 0          | 0         | 6           | 19           |                                                      | I        |          |          |          |          |          | WD       | WD                | I  |
| B*38:36                                                 | 38:36                  | HLA07211  |                                               | 0         | 0            | 4          | 0          | 0          | 0         | 0           | 4            |                                                      |          |          |          |          |          |          |          |                   |    |
| B*38:37                                                 | 38:37                  | HLA07310  |                                               | 0         | 0            | 5          | 0          | 0          | 0         | 4           | 9            |                                                      |          | WD       |          |          |          |          | WD       | WD                |    |
| B*38:41                                                 | 38:41                  | HLA08389  |                                               | 0         | 0            | 1          | 1          | 0          | 0         | 0           | 2            |                                                      |          |          |          |          |          |          |          |                   |    |
| B*38:44                                                 | 38:44                  | HLA10050  |                                               | 0         | 0            | 1          | 0          | 0          | 0         | 0           | 1            |                                                      |          |          |          |          |          |          |          |                   |    |
| B*38:45                                                 | 38:45                  | HLA10051  |                                               | 0         | 1            | 0          | 0          | 0          | 0         | 0           | 1            |                                                      |          |          |          |          |          |          |          |                   |    |
| B*38:47                                                 | 38:47                  | HLA10478  |                                               | 0         | 2            | 0          | 0          | 0          | 0         | 0           | 2            |                                                      |          |          |          |          |          |          |          |                   |    |

| Supplemental Table 9: HLA-B Allele Summary <sup>a</sup> |                        |           | Allele Count by Population Group <sup>b</sup> |            |              |               |             |             |            |              |               | 3.0.0 CIWD Category by Population Group <sup>c</sup> |          |          |          |          |          |          |          |                   |
|---------------------------------------------------------|------------------------|-----------|-----------------------------------------------|------------|--------------|---------------|-------------|-------------|------------|--------------|---------------|------------------------------------------------------|----------|----------|----------|----------|----------|----------|----------|-------------------|
| Allele                                                  | Genomic typing         | Allele ID | G group                                       | AFA        | API          | EURO          | MENA        | HIS         | NAM        | UNK          | Total         | AFA                                                  | API      | EURO     | MENA     | HIS      | NAM      | UNK      | Total    | Highest Frequency |
| B*38:48                                                 | 38:48                  | HLA10637  |                                               | 0          | 1            | 0             | 0           | 0           | 0          | 0            | 1             |                                                      |          |          |          |          |          |          |          |                   |
| B*38:56                                                 | 38:56                  | HLA12571  |                                               | 0          | 0            | 1             | 0           | 0           | 0          | 0            | 1             |                                                      |          |          |          |          |          |          |          |                   |
| B*38:60                                                 | 38:60                  | HLA14603  |                                               | 0          | 0            | 1             | 0           | 0           | 0          | 0            | 1             |                                                      |          |          |          |          |          |          |          |                   |
| B*38:61                                                 | 38:61                  | HLA14736  |                                               | 0          | 0            | 2             | 0           | 0           | 0          | 0            | 2             |                                                      |          |          |          |          |          |          |          |                   |
| B*38:64                                                 | 38:64                  | HLA15645  |                                               | 0          | 4            | 0             | 0           | 0           | 0          | 0            | 4             |                                                      |          |          |          |          |          |          |          |                   |
| B*38:CODE                                               | 38:CODE                |           |                                               | 53         | 198          | 14406         | 365         | 1045        | 51         | 2333         | 18451         | NA                                                   | NA       | NA       | NA       | NA       | NA       | NA       | NA       | NA                |
| <b>B*39:01 total</b>                                    | <b>39:01 total</b>     |           |                                               | <b>996</b> | <b>11462</b> | <b>152989</b> | <b>3093</b> | <b>5425</b> | <b>744</b> | <b>11962</b> | <b>186671</b> | <b>C</b>                                             | <b>C</b> | <b>C</b> | <b>C</b> | <b>C</b> | <b>C</b> | <b>C</b> | <b>C</b> | <b>C</b>          |
| B*39:01                                                 | 39:01                  |           |                                               | 0          | 12           | 1033          | 0           | 44          | 2          | 30           | 1121          |                                                      | WD       | I        |          | I        |          | I        | I        | I                 |
| <b>B*39:01L total</b>                                   | <b>39:01L total</b>    |           |                                               | <b>0</b>   | <b>0</b>     | <b>1</b>      | <b>1</b>    | <b>0</b>    | <b>0</b>   | <b>0</b>     | <b>2</b>      |                                                      |          |          |          |          |          |          |          |                   |
| B*39:01P                                                | 39:01P                 |           |                                               | 0          | 0            | 295           | 1           | 0           | 0          | 0            | 296           |                                                      |          | I        |          |          |          |          | I        | I                 |
| <b>B*39:01:01G total</b>                                | <b>39:01:01G total</b> |           |                                               | <b>991</b> | <b>11447</b> | <b>151615</b> | <b>3089</b> | <b>5239</b> | <b>735</b> | <b>11906</b> | <b>185022</b> | <b>C</b>                                             | <b>C</b> | <b>C</b> | <b>C</b> | <b>C</b> | <b>C</b> | <b>C</b> | <b>C</b> | <b>C</b>          |
| B*39:01:01G                                             | 39:01:01G              |           | 39:01:01G                                     | 864        | 10786        | 147619        | 3071        | 4445        | 641        | 11302        | 178728        | C                                                    | C        | C        | C        | C        | C        | C        | C        | C                 |
| B*39:01:01                                              | 39:01:01               |           | 39:01:01G                                     | 109        | 501          | 3225          | 12          | 649         | 81         | 455          | 5032          | C                                                    | C        | C        | WD       | C        | C        | C        | C        | C                 |
| B*39:01:01:01                                           | 39:01:01:01            | HLA00271  | 39:01:01G                                     | 1          | 0            | 34            | 0           | 1           | 0          | 7            | 43            |                                                      |          | WD       |          |          |          | WD       | WD       | WD                |
| B*39:01:01:02L                                          | 39:01:01:02L           | HLA02220  | 39:01:01G                                     | 0          | 0            | 1             | 1           | 0           | 0          | 0            | 2             |                                                      |          |          |          |          |          |          |          |                   |
| B*39:01:01:03                                           | 39:01:01:03            | HLA08053  | 39:01:01G                                     | 15         | 100          | 727           | 5           | 134         | 12         | 111          | 1104          | WD                                                   | I        | I        | WD       | C        | C        | I        | I        | C                 |
| B*39:01:01:04                                           | 39:01:01:04            | HLA14074  | 39:01:01G                                     | 0          | 1            | 0             | 0           | 0           | 0          | 0            | 1             |                                                      |          |          |          |          |          |          |          |                   |
| B*39:01:01:05                                           | 39:01:01:05            | HLA16282  | 39:01:01G                                     | 0          | 0            | 1             | 0           | 0           | 0          | 0            | 1             |                                                      |          |          |          |          |          |          |          |                   |
| B*39:01:01:06                                           | 39:01:01:06            | HLA16854  | 39:01:01G                                     | 0          | 0            | 0             | 0           | 0           | 0          | 1            | 1             |                                                      |          |          |          |          |          |          |          |                   |
| B*39:01:01:07                                           | 39:01:01:07            | HLA17074  | 39:01:01G                                     | 2          | 0            | 2             | 0           | 9           | 1          | 3            | 17            |                                                      |          |          |          | I        |          |          | WD       | I                 |
| B*39:01:03                                              | 39:01:03               |           | 39:01:01G                                     | 0          | 59           | 2             | 0           | 1           | 0          | 27           | 89            |                                                      | I        |          |          |          |          | I        | WD       | I                 |
| B*39:01:24                                              | 39:01:24               | HLA16355  | 39:01:01G                                     | 0          | 0            | 4             | 0           | 0           | 0          | 0            | 4             |                                                      |          |          |          |          |          |          |          |                   |
| B*39:01:04                                              | 39:01:04               | HLA01123  |                                               | 5          | 3            | 14            | 2           | 122         | 6          | 22           | 174           | WD                                                   |          | WD       |          | C        | WD       | I        | I        | C                 |
| B*39:01:05                                              | 39:01:05               | HLA03314  |                                               | 0          | 0            | 3             | 0           | 19          | 1          | 2            | 25            |                                                      |          |          |          | I        |          |          | WD       | I                 |
| B*39:01:07                                              | 39:01:07               | HLA04041  |                                               | 0          | 0            | 4             | 0           | 0           | 0          | 0            | 4             |                                                      |          |          |          |          |          |          |          |                   |
| B*39:01:08                                              | 39:01:08               | HLA04043  |                                               | 0          | 0            | 2             | 0           | 0           | 0          | 0            | 2             |                                                      |          |          |          |          |          |          |          |                   |
| B*39:01:09                                              | 39:01:09               | HLA04050  |                                               | 0          | 0            | 4             | 0           | 0           | 0          | 0            | 4             |                                                      |          |          |          |          |          |          |          |                   |
| B*39:01:10                                              | 39:01:10               | HLA04177  |                                               | 0          | 0            | 9             | 0           | 0           | 0          | 1            | 10            |                                                      |          | WD       |          |          |          |          | WD       | WD                |
| B*39:01:12                                              | 39:01:12               | HLA05514  |                                               | 0          | 0            | 5             | 0           | 0           | 0          | 0            | 5             |                                                      |          | WD       |          |          |          |          | WD       | WD                |
| B*39:01:14                                              | 39:01:14               | HLA08283  |                                               | 0          | 0            | 2             | 1           | 0           | 0          | 0            | 3             |                                                      |          |          |          |          |          |          |          |                   |
| B*39:01:19                                              | 39:01:19               | HLA11452  |                                               | 0          | 0            | 2             | 0           | 1           | 0          | 1            | 4             |                                                      |          |          |          |          |          |          |          |                   |

| Supplemental Table 9: HLA-B Allele Summary <sup>a</sup> |                        |           | Allele Count by Population Group <sup>b</sup> |            |             |              |            |              |             |             |              | 3.0.0 CIWD Category by Population Group <sup>c</sup> |          |          |          |          |          |          |          |                   |
|---------------------------------------------------------|------------------------|-----------|-----------------------------------------------|------------|-------------|--------------|------------|--------------|-------------|-------------|--------------|------------------------------------------------------|----------|----------|----------|----------|----------|----------|----------|-------------------|
| Allele                                                  | Genomic typing         | Allele ID | G group                                       | AFA        | API         | EURO         | MENA       | HIS          | NAM         | UNK         | Total        | AFA                                                  | API      | EURO     | MENA     | HIS      | NAM      | UNK      | Total    | Highest Frequency |
| B*39:01:20                                              | 39:01:20               | HLA11739  |                                               | 0          | 0           | 1            | 0          | 0            | 0           | 0           | 1            |                                                      |          |          |          |          |          |          |          |                   |
| <b>B*39:02 total</b>                                    | <b>39:02 total</b>     |           |                                               | <b>73</b>  | <b>66</b>   | <b>192</b>   | <b>1</b>   | <b>3476</b>  | <b>246</b>  | <b>565</b>  | <b>4619</b>  | <b>C</b>                                             | <b>I</b> | <b>I</b> |          | <b>C</b> | <b>C</b> | <b>C</b> | <b>C</b> | <b>C</b>          |
| B*39:02                                                 | 39:02                  |           |                                               | 7          | 7           | 19           | 0          | 395          | 16          | 37          | 481          | WD                                                   | WD       | WD       |          | C        | C        | I        | I        | C                 |
| B*39:02:01                                              | 39:02:01               | HLA00274  |                                               | 0          | 23          | 1            | 0          | 4            | 0           | 27          | 55           |                                                      | I        |          |          |          |          | I        | WD       | I                 |
| <b>B*39:02:02G total</b>                                | <b>39:02:02G total</b> |           |                                               | <b>66</b>  | <b>36</b>   | <b>172</b>   | <b>1</b>   | <b>3077</b>  | <b>230</b>  | <b>501</b>  | <b>4083</b>  | <b>C</b>                                             | <b>I</b> | <b>I</b> |          | <b>C</b> | <b>C</b> | <b>C</b> | <b>C</b> | <b>C</b>          |
| B*39:02:02G                                             | 39:02:02G              |           | 39:02:02G                                     | 2          | 0           | 11           | 0          | 75           | 0           | 31          | 119          |                                                      |          | WD       |          | C        |          | I        | WD       | C                 |
| B*39:02:02                                              | 39:02:02               |           | 39:02:02G                                     | 64         | 36          | 161          | 1          | 2917         | 227         | 464         | 3870         | C                                                    | I        | I        |          | C        | C        | C        | C        | C                 |
| B*39:02:02:01                                           | 39:02:02:01            | HLA00275  | 39:02:02G                                     | 0          | 0           | 0            | 0          | 85           | 3           | 6           | 94           |                                                      |          |          |          | C        |          | WD       | WD       | C                 |
| <b>B*39:03 total</b>                                    | <b>39:03 total</b>     |           |                                               | <b>7</b>   | <b>3</b>    | <b>995</b>   | <b>0</b>   | <b>1233</b>  | <b>20</b>   | <b>1528</b> | <b>3786</b>  | <b>WD</b>                                            |          | <b>I</b> |          | <b>C</b> | <b>C</b> | <b>C</b> | <b>C</b> | <b>C</b>          |
| <b>B*39:03:01G total</b>                                | <b>39:03:01G total</b> |           |                                               | <b>7</b>   | <b>3</b>    | <b>995</b>   | <b>0</b>   | <b>1233</b>  | <b>20</b>   | <b>1528</b> | <b>3786</b>  | <b>WD</b>                                            |          | <b>I</b> |          | <b>C</b> | <b>C</b> | <b>C</b> | <b>C</b> | <b>C</b>          |
| B*39:03                                                 | 39:03                  |           | 39:03:01G                                     | 7          | 3           | 971          | 0          | 1159         | 20          | 1469        | 3629         | WD                                                   |          | I        |          | C        | C        | C        | C        | C                 |
| B*39:03:01G                                             | 39:03:01G              |           | 39:03:01G                                     | 0          | 0           | 24           | 0          | 73           | 0           | 57          | 154          |                                                      |          | WD       |          | C        |          | I        | WD       | C                 |
| B*39:03:01                                              | 39:03:01               |           | 39:03:01G                                     | 0          | 0           | 0            | 0          | 1            | 0           | 2           | 3            |                                                      |          |          |          |          |          |          |          |                   |
| B*39:04                                                 | 39:04                  | HLA00277  |                                               | 0          | 38          | 4            | 0          | 1            | 0           | 17          | 60           |                                                      | I        |          |          |          |          | I        | WD       | I                 |
| <b>B*39:05 total</b>                                    | <b>39:05 total</b>     |           |                                               | <b>313</b> | <b>668</b>  | <b>2322</b>  | <b>107</b> | <b>17617</b> | <b>1166</b> | <b>3418</b> | <b>25611</b> | <b>C</b>                                             | <b>C</b> | <b>C</b> | <b>C</b> | <b>C</b> | <b>C</b> | <b>C</b> | <b>C</b> | <b>C</b>          |
| B*39:05                                                 | 39:05                  |           |                                               | 27         | 35          | 303          | 9          | 1893         | 86          | 304         | 2657         | WD                                                   | I        | I        | WD       | C        | C        | C        | C        | C                 |
| <b>B*39:05:01G total</b>                                | <b>39:05:01G total</b> |           |                                               | <b>286</b> | <b>633</b>  | <b>2019</b>  | <b>98</b>  | <b>15724</b> | <b>1079</b> | <b>3114</b> | <b>22953</b> | <b>C</b>                                             | <b>C</b> | <b>C</b> | <b>C</b> | <b>C</b> | <b>C</b> | <b>C</b> | <b>C</b> | <b>C</b>          |
| B*39:05:01G                                             | 39:05:01G              |           | 39:05:01G                                     | 0          | 3           | 0            | 0          | 0            | 0           | 0           | 3            |                                                      |          |          |          |          |          |          |          |                   |
| B*39:05:01                                              | 39:05:01               |           | 39:05:01G                                     | 286        | 630         | 2019         | 98         | 15724        | 1079        | 3114        | 22950        | C                                                    | C        | C        | C        | C        | C        | C        | C        | C                 |
| B*39:05:02                                              | 39:05:02               | HLA04440  |                                               | 0          | 0           | 0            | 0          | 0            | 1           | 0           | 1            |                                                      |          |          |          |          |          |          |          |                   |
| <b>B*39:06 total</b>                                    | <b>39:06 total</b>     |           |                                               | <b>578</b> | <b>1196</b> | <b>59147</b> | <b>824</b> | <b>13048</b> | <b>877</b>  | <b>7110</b> | <b>82780</b> | <b>C</b>                                             | <b>C</b> | <b>C</b> | <b>C</b> | <b>C</b> | <b>C</b> | <b>C</b> | <b>C</b> | <b>C</b>          |
| B*39:06                                                 | 39:06                  |           |                                               | 30         | 27          | 3177         | 58         | 1493         | 73          | 355         | 5213         | WD                                                   | I        | C        | C        | C        | C        | C        | C        | C                 |
| B*39:06P                                                | 39:06P                 |           |                                               | 0          | 0           | 15           | 0          | 0            | 0           | 0           | 15           |                                                      |          | WD       |          |          |          |          | WD       | WD                |
| B*39:06:01                                              | 39:06:01               | HLA00279  |                                               | 21         | 4           | 83           | 1          | 366          | 45          | 127         | 647          | WD                                                   |          | WD       |          | C        | C        | I        | I        | C                 |
| <b>B*39:06:02G total</b>                                | <b>39:06:02G total</b> |           |                                               | <b>527</b> | <b>1165</b> | <b>55871</b> | <b>765</b> | <b>11189</b> | <b>759</b>  | <b>6628</b> | <b>76904</b> | <b>C</b>                                             | <b>C</b> | <b>C</b> | <b>C</b> | <b>C</b> | <b>C</b> | <b>C</b> | <b>C</b> | <b>C</b>          |
| B*39:06:02G                                             | 39:06:02G              |           | 39:06:02G                                     | 17         | 743         | 6209         | 56         | 250          | 15          | 470         | 7760         | WD                                                   | C        | C        | C        | C        | C        | C        | C        | C                 |
| B*39:06:02                                              | 39:06:02               |           | 39:06:02G                                     | 482        | 401         | 49140        | 702        | 9591         | 663         | 6022        | 67001        | C                                                    | C        | C        | C        | C        | C        | C        | C        | C                 |
| B*39:06:02:01                                           | 39:06:02:01            | HLA00280  | 39:06:02G                                     | 12         | 2           | 428          | 3          | 40           | 5           | 40          | 530          | WD                                                   |          | I        |          | I        | WD       | I        | I        | I                 |
| B*39:06:02:02                                           | 39:06:02:02            | HLA16287  | 39:06:02G                                     | 13         | 10          | 26           | 2          | 1298         | 74          | 88          | 1511         | WD                                                   | WD       | WD       |          | C        | C        | I        | I        | C                 |
| B*39:06:02:03                                           | 39:06:02:03            | HLA16286  | 39:06:02G                                     | 3          | 9           | 68           | 2          | 10           | 2           | 8           | 102          |                                                      | WD       | WD       |          | I        |          | WD       | WD       | I                 |
| B*39:06:03                                              | 39:06:03               | HLA09593  |                                               | 0          | 0           | 1            | 0          | 0            | 0           | 0           | 1            |                                                      |          |          |          |          |          |          |          |                   |

| Supplemental Table 9: HLA-B Allele Summary <sup>a</sup> |                        |           | Allele Count by Population Group <sup>b</sup> |             |            |             |            |             |           |             |             | 3.0.0 CIWD Category by Population Group <sup>c</sup> |          |           |          |           |          |          |           |                   |
|---------------------------------------------------------|------------------------|-----------|-----------------------------------------------|-------------|------------|-------------|------------|-------------|-----------|-------------|-------------|------------------------------------------------------|----------|-----------|----------|-----------|----------|----------|-----------|-------------------|
| Allele                                                  | Genomic typing         | Allele ID | G group                                       | AFA         | API        | EURO        | MENA       | HIS         | NAM       | UNK         | Total       | AFA                                                  | API      | EURO      | MENA     | HIS       | NAM      | UNK      | Total     | Highest Frequency |
| B*39:07                                                 | 39:07                  | HLA00281  |                                               | 0           | 1          | 3           | 0          | 35          | 2         | 9           | 50          |                                                      |          |           |          | I         |          | WD       | WD        | I                 |
| B*39:08                                                 | 39:08                  | HLA00282  |                                               | 35          | 26         | 117         | 4          | 2242        | 215       | 336         | 2975        | WD                                                   | I        | WD        |          | C         | C        | C        | C         | C                 |
| <b>B*39:09 total</b>                                    | <b>39:09 total</b>     |           |                                               | <b>24</b>   | <b>631</b> | <b>1073</b> | <b>0</b>   | <b>1481</b> | <b>60</b> | <b>1454</b> | <b>4723</b> | <b>WD</b>                                            | <b>C</b> | <b>I</b>  |          | <b>C</b>  | <b>C</b> | <b>C</b> | <b>C</b>  | <b>C</b>          |
| B*39:09                                                 | 39:09                  |           |                                               | 10          | 208        | 405         | 0          | 466         | 28        | 304         | 1421        | WD                                                   | C        | I         |          | C         | C        | C        | I         | C                 |
| <b>B*39:09:01G total</b>                                | <b>39:09:01G total</b> |           |                                               | <b>14</b>   | <b>423</b> | <b>668</b>  | <b>0</b>   | <b>1014</b> | <b>32</b> | <b>1150</b> | <b>3301</b> | <b>WD</b>                                            | <b>C</b> | <b>I</b>  |          | <b>C</b>  | <b>C</b> | <b>C</b> | <b>C</b>  | <b>C</b>          |
| B*39:09:01G                                             | 39:09:01G              |           | 39:09:01G                                     | 0           | 21         | 45          | 0          | 78          | 0         | 52          | 196         |                                                      | I        | WD        |          | C         |          | I        | I         | C                 |
| B*39:09:01                                              | 39:09:01               |           | 39:09:01G                                     | 14          | 398        | 623         | 0          | 931         | 31        | 1094        | 3091        | WD                                                   | C        | I         |          | C         | C        | C        | C         | C                 |
| B*39:09:01:01                                           | 39:09:01:01            | HLA00283  | 39:09:01G                                     | 0           | 4          | 0           | 0          | 4           | 1         | 3           | 12          |                                                      |          |           |          |           |          |          | WD        | WD                |
| B*39:09:01:02                                           | 39:09:01:02            | HLA16753  | 39:09:01G                                     | 0           | 0          | 0           | 0          | 1           | 0         | 0           | 1           |                                                      |          |           |          |           |          |          |           |                   |
| B*39:09:01:03                                           | 39:09:01:03            | HLA16852  | 39:09:01G                                     | 0           | 0          | 0           | 0          | 0           | 0         | 1           | 1           |                                                      |          |           |          |           |          |          |           |                   |
| B*39:09:03                                              | 39:09:03               | HLA12762  |                                               | 0           | 0          | 0           | 0          | 1           | 0         | 0           | 1           |                                                      |          |           |          |           |          |          |           |                   |
| <b>B*39:10 total</b>                                    | <b>39:10 total</b>     |           |                                               | <b>3330</b> | <b>66</b>  | <b>1235</b> | <b>856</b> | <b>352</b>  | <b>51</b> | <b>984</b>  | <b>6874</b> | <b>C</b>                                             | <b>I</b> | <b>C</b>  | <b>C</b> | <b>C</b>  | <b>C</b> | <b>C</b> | <b>C</b>  | <b>C</b>          |
| B*39:10                                                 | 39:10                  |           |                                               | 406         | 5          | 181         | 48         | 60          | 2         | 140         | 842         | C                                                    | WD       | I         | C        | I         |          | C        | I         | C                 |
| B*39:10P                                                | 39:10P                 |           |                                               | 0           | 0          | 1           | 0          | 0           | 0         | 0           | 1           |                                                      |          |           |          |           |          |          |           |                   |
| B*39:10:01                                              | 39:10:01               | HLA00284  |                                               | 2924        | 61         | 1053        | 808        | 292         | 49        | 844         | 6031        | C                                                    | I        | I         | C        | C         | C        | C        | C         | C                 |
| B*39:11                                                 | 39:11                  | HLA00285  |                                               | 27          | 15         | 74          | 0          | 995         | 85        | 197         | 1393        | WD                                                   | I        | WD        |          | C         | C        | C        | I         | C                 |
| B*39:12                                                 | 39:12                  | HLA00286  |                                               | 3           | 0          | 39          | 0          | 107         | 11        | 90          | 250         |                                                      |          | WD        |          | C         | C        | I        | I         | C                 |
| <b>B*39:13 total</b>                                    | <b>39:13 total</b>     |           |                                               | <b>18</b>   | <b>1</b>   | <b>110</b>  | <b>0</b>   | <b>320</b>  | <b>30</b> | <b>179</b>  | <b>658</b>  | <b>WD</b>                                            |          | <b>WD</b> |          | <b>C</b>  | <b>C</b> | <b>C</b> | <b>I</b>  | <b>C</b>          |
| B*39:13                                                 | 39:13                  |           |                                               | 3           | 0          | 34          | 0          | 45          | 3         | 36          | 121         |                                                      |          | WD        |          | I         |          | I        | WD        | I                 |
| B*39:13:01                                              | 39:13:01               | HLA00287  |                                               | 15          | 1          | 74          | 0          | 270         | 27        | 141         | 528         | WD                                                   |          | WD        |          | C         | C        | C        | I         | C                 |
| B*39:13:02                                              | 39:13:02               | HLA02165  |                                               | 0           | 0          | 2           | 0          | 5           | 0         | 2           | 9           |                                                      |          |           |          | WD        |          |          | WD        | WD                |
| <b>B*39:14 total</b>                                    | <b>39:14 total</b>     |           |                                               | <b>0</b>    | <b>2</b>   | <b>111</b>  | <b>0</b>   | <b>209</b>  | <b>8</b>  | <b>132</b>  | <b>462</b>  |                                                      |          | <b>WD</b> |          | <b>C</b>  | <b>C</b> | <b>I</b> | <b>I</b>  | <b>C</b>          |
| <b>B*39:14:01G total</b>                                | <b>39:14:01G total</b> |           |                                               | <b>0</b>    | <b>2</b>   | <b>111</b>  | <b>0</b>   | <b>209</b>  | <b>8</b>  | <b>132</b>  | <b>462</b>  |                                                      |          | <b>WD</b> |          | <b>C</b>  | <b>C</b> | <b>I</b> | <b>I</b>  | <b>C</b>          |
| B*39:14                                                 | 39:14                  |           | 39:14:01G                                     | 0           | 2          | 111         | 0          | 209         | 8         | 132         | 462         |                                                      |          | WD        |          | C         | C        | I        | I         | C                 |
| B*39:15                                                 | 39:15                  | HLA00289  |                                               | 3           | 235        | 25          | 5          | 3           | 0         | 60          | 331         |                                                      | C        | WD        | WD       |           |          | I        | I         | C                 |
| <b>B*39:19 total</b>                                    | <b>39:19 total</b>     |           |                                               | <b>0</b>    | <b>1</b>   | <b>9</b>    | <b>0</b>   | <b>5</b>    | <b>0</b>  | <b>1</b>    | <b>16</b>   |                                                      |          | <b>WD</b> |          | <b>WD</b> |          |          | <b>WD</b> | <b>WD</b>         |
| B*39:19                                                 | 39:19                  |           |                                               | 0           | 1          | 1           | 0          | 1           | 0         | 0           | 3           |                                                      |          |           |          |           |          |          |           |                   |
| B*39:19:01                                              | 39:19:01               | HLA01133  |                                               | 0           | 0          | 7           | 0          | 0           | 0         | 0           | 7           |                                                      |          | WD        |          |           |          |          | WD        | WD                |
| B*39:19:02                                              | 39:19:02               | HLA03275  |                                               | 0           | 0          | 1           | 0          | 4           | 0         | 1           | 6           |                                                      |          |           |          |           |          |          | WD        | WD                |
| B*39:20                                                 | 39:20                  | HLA01183  |                                               | 17          | 2          | 47          | 0          | 126         | 4         | 26          | 222         | WD                                                   |          | WD        |          | C         |          | I        | I         | C                 |
| B*39:22                                                 | 39:22                  | HLA01196  |                                               | 1           | 0          | 2           | 0          | 25          | 2         | 7           | 37          |                                                      |          |           |          | I         |          | WD       | WD        | I                 |



| Supplemental Table 9: HLA-B Allele Summary <sup>a</sup> |                        |           | Allele Count by Population Group <sup>b</sup> |            |           |             |            |            |           |            |             | 3.0.0 CIWD Category by Population Group <sup>c</sup> |          |           |          |          |          |          |           |                   |
|---------------------------------------------------------|------------------------|-----------|-----------------------------------------------|------------|-----------|-------------|------------|------------|-----------|------------|-------------|------------------------------------------------------|----------|-----------|----------|----------|----------|----------|-----------|-------------------|
| Allele                                                  | Genomic typing         | Allele ID | G group                                       | AFA        | API       | EURO        | MENA       | HIS        | NAM       | UNK        | Total       | AFA                                                  | API      | EURO      | MENA     | HIS      | NAM      | UNK      | Total     | Highest Frequency |
| B*39:23                                                 | 39:23                  | HLA01203  |                                               | 0          | 4         | 0           | 0          | 0          | 0         | 0          | 4           |                                                      |          |           |          |          |          |          |           |                   |
| <b>B*39:24 total</b>                                    | <b>39:24 total</b>     |           |                                               | <b>190</b> | <b>88</b> | <b>6398</b> | <b>813</b> | <b>242</b> | <b>16</b> | <b>702</b> | <b>8449</b> | <b>C</b>                                             | <b>I</b> | <b>C</b>  | <b>C</b> | <b>C</b> | <b>C</b> | <b>C</b> | <b>C</b>  | <b>C</b>          |
| B*39:24                                                 | 39:24                  |           |                                               | 14         | 4         | 550         | 39         | 54         | 1         | 51         | 713         | WD                                                   |          | I         | WD       | I        |          | I        | I         | I                 |
| B*39:24P                                                | 39:24P                 |           |                                               | 0          | 0         | 3           | 0          | 0          | 0         | 0          | 3           |                                                      |          |           |          |          |          |          |           |                   |
| B*39:24:01                                              | 39:24:01               | HLA01221  |                                               | 176        | 84        | 5844        | 774        | 188        | 15        | 650        | 7731        | C                                                    | I        | C         | C        | C        | C        | C        | C         | C                 |
| B*39:24:02                                              | 39:24:02               | HLA06320  |                                               | 0          | 0         | 1           | 0          | 0          | 0         | 1          | 2           |                                                      |          |           |          |          |          |          |           |                   |
| B*39:26                                                 | 39:26                  | HLA01528  |                                               | 0          | 0         | 18          | 0          | 0          | 0         | 3          | 21          |                                                      |          | WD        |          |          |          |          | WD        | WD                |
| B*39:28                                                 | 39:28                  | HLA01789  |                                               | 0          | 0         | 1           | 0          | 0          | 0         | 0          | 1           |                                                      |          |           |          |          |          |          |           |                   |
| B*39:29                                                 | 39:29                  | HLA01920  |                                               | 0          | 0         | 17          | 0          | 0          | 0         | 1          | 18          |                                                      |          | WD        |          |          |          |          | WD        | WD                |
| B*39:30                                                 | 39:30                  | HLA01924  |                                               | 0          | 0         | 1           | 0          | 0          | 0         | 0          | 1           |                                                      |          |           |          |          |          |          |           |                   |
| <b>B*39:31 total</b>                                    | <b>39:31 total</b>     |           |                                               | <b>5</b>   | <b>15</b> | <b>1228</b> | <b>109</b> | <b>15</b>  | <b>1</b>  | <b>61</b>  | <b>1434</b> | <b>WD</b>                                            | <b>I</b> | <b>C</b>  | <b>C</b> | <b>I</b> |          | <b>I</b> | <b>I</b>  | <b>C</b>          |
| <b>B*39:31:01G total</b>                                | <b>39:31:01G total</b> |           |                                               | <b>5</b>   | <b>15</b> | <b>1228</b> | <b>109</b> | <b>15</b>  | <b>1</b>  | <b>61</b>  | <b>1434</b> | <b>WD</b>                                            | <b>I</b> | <b>C</b>  | <b>C</b> | <b>I</b> |          | <b>I</b> | <b>I</b>  | <b>C</b>          |
| B*39:31                                                 | 39:31                  |           | 39:31:01G                                     | 5          | 15        | 1228        | 109        | 15         | 1         | 61         | 1434        | WD                                                   | I        | C         | C        | I        |          | I        | I         | C                 |
| B*39:32                                                 | 39:32                  | HLA01927  |                                               | 0          | 0         | 3           | 0          | 0          | 0         | 0          | 3           |                                                      |          |           |          |          |          |          |           |                   |
| B*39:33                                                 | 39:33                  | HLA02097  |                                               | 0          | 0         | 6           | 0          | 0          | 0         | 1          | 7           |                                                      |          | WD        |          |          |          |          | WD        | WD                |
| B*39:34                                                 | 39:34                  | HLA02163  |                                               | 0          | 0         | 2           | 0          | 2          | 0         | 1          | 5           |                                                      |          |           |          |          |          |          | WD        | WD                |
| B*39:35                                                 | 39:35                  | HLA02331  |                                               | 0          | 0         | 1           | 0          | 0          | 0         | 1          | 2           |                                                      |          |           |          |          |          |          |           |                   |
| B*39:36                                                 | 39:36                  | HLA02378  |                                               | 0          | 3         | 1           | 0          | 0          | 0         | 0          | 4           |                                                      |          |           |          |          |          |          |           |                   |
| B*39:37                                                 | 39:37                  | HLA02384  |                                               | 0          | 0         | 6           | 0          | 39         | 1         | 14         | 60          |                                                      |          | WD        |          | I        |          | I        | WD        | I                 |
| B*39:38Q                                                | 39:38Q                 | HLA02412  |                                               | 0          | 2         | 0           | 0          | 0          | 0         | 0          | 2           |                                                      |          |           |          |          |          |          |           |                   |
| <b>B*39:39 total</b>                                    | <b>39:39 total</b>     |           |                                               | <b>1</b>   | <b>0</b>  | <b>2</b>    | <b>0</b>   | <b>21</b>  | <b>2</b>  | <b>3</b>   | <b>29</b>   |                                                      |          |           |          | <b>I</b> |          |          | <b>WD</b> | <b>I</b>          |
| B*39:39                                                 | 39:39                  |           |                                               | 0          | 0         | 1           | 0          | 3          | 1         | 1          | 6           |                                                      |          |           |          |          |          |          | WD        | WD                |
| B*39:39:01                                              | 39:39:01               | HLA02426  |                                               | 1          | 0         | 1           | 0          | 18         | 1         | 2          | 23          |                                                      |          |           |          | I        |          |          | WD        | I                 |
| <b>B*39:40N total</b>                                   | <b>39:40N total</b>    |           |                                               | <b>0</b>   | <b>0</b>  | <b>6</b>    | <b>0</b>   | <b>0</b>   | <b>0</b>  | <b>0</b>   | <b>6</b>    |                                                      |          | <b>WD</b> |          |          |          |          | <b>WD</b> | <b>WD</b>         |
| B*39:40N                                                | 39:40N                 |           |                                               | 0          | 0         | 2           | 0          | 0          | 0         | 0          | 2           |                                                      |          |           |          |          |          |          |           |                   |
| B*39:40:01N                                             | 39:40:01N              | HLA02436  |                                               | 0          | 0         | 1           | 0          | 0          | 0         | 0          | 1           |                                                      |          |           |          |          |          |          |           |                   |
| B*39:40:02N                                             | 39:40:02N              | HLA08388  |                                               | 0          | 0         | 3           | 0          | 0          | 0         | 0          | 3           |                                                      |          |           |          |          |          |          |           |                   |
| B*39:43                                                 | 39:43                  | HLA03006  |                                               | 0          | 6         | 2           | 0          | 0          | 0         | 0          | 8           |                                                      | WD       |           |          |          |          |          | WD        | WD                |
| B*39:47                                                 | 39:47                  | HLA03621  |                                               | 0          | 5         | 2           | 0          | 0          | 0         | 1          | 8           |                                                      | WD       |           |          |          |          |          | WD        | WD                |
| B*39:49                                                 | 39:49                  | HLA03747  |                                               | 0          | 2         | 0           | 0          | 0          | 0         | 1          | 3           |                                                      |          |           |          |          |          |          |           |                   |
| B*39:51                                                 | 39:51                  | HLA04072  |                                               | 0          | 0         | 0           | 1          | 0          | 0         | 0          | 1           |                                                      |          |           |          |          |          |          |           |                   |

| Supplemental Table 9: HLA-B Allele Summary <sup>a</sup> |                |           | Allele Count by Population Group <sup>b</sup> |     |     |      |      |     |     |     |       | 3.0.0 CIWD Category by Population Group <sup>c</sup> |     |      |      |     |     |     |       |                   |
|---------------------------------------------------------|----------------|-----------|-----------------------------------------------|-----|-----|------|------|-----|-----|-----|-------|------------------------------------------------------|-----|------|------|-----|-----|-----|-------|-------------------|
| Allele                                                  | Genomic typing | Allele ID | G group                                       | AFA | API | EURO | MENA | HIS | NAM | UNK | Total | AFA                                                  | API | EURO | MENA | HIS | NAM | UNK | Total | Highest Frequency |
| B*39:52                                                 | 39:52          | HLA04105  |                                               | 0   | 0   | 0    | 1    | 0   | 0   | 0   | 1     |                                                      |     |      |      |     |     |     |       |                   |
| B*39:53                                                 | 39:53          | HLA04200  |                                               | 0   | 0   | 7    | 1    | 0   | 0   | 0   | 8     |                                                      |     | WD   |      |     |     |     | WD    | WD                |
| B*39:54                                                 | 39:54          | HLA04161  |                                               | 0   | 0   | 0    | 0    | 2   | 0   | 1   | 3     |                                                      |     |      |      |     |     |     |       |                   |
| B*39:55                                                 | 39:55          | HLA04451  |                                               | 0   | 0   | 0    | 0    | 2   | 0   | 0   | 2     |                                                      |     |      |      |     |     |     |       |                   |
| B*39:57                                                 | 39:57          | HLA04796  |                                               | 0   | 0   | 7    | 0    | 0   | 0   | 3   | 10    |                                                      |     | WD   |      |     |     |     | WD    | WD                |
| B*39:60                                                 | 39:60          | HLA05292  |                                               | 0   | 2   | 0    | 0    | 0   | 0   | 0   | 2     |                                                      |     |      |      |     |     |     |       |                   |
| B*39:61                                                 | 39:61          | HLA05511  |                                               | 0   | 0   | 2    | 0    | 0   | 0   | 0   | 2     |                                                      |     |      |      |     |     |     |       |                   |
| B*39:62                                                 | 39:62          | HLA05714  |                                               | 0   | 0   | 11   | 0    | 1   | 0   | 4   | 16    |                                                      |     | WD   |      |     |     |     | WD    | WD                |
| B*39:64                                                 | 39:64          | HLA06938  |                                               | 0   | 0   | 4    | 0    | 0   | 0   | 0   | 4     |                                                      |     |      |      |     |     |     |       |                   |
| B*39:65                                                 | 39:65          | HLA06951  |                                               | 0   | 0   | 2    | 0    | 0   | 0   | 0   | 2     |                                                      |     |      |      |     |     |     |       |                   |
| B*39:68                                                 | 39:68          | HLA07307  |                                               | 0   | 0   | 4    | 0    | 0   | 0   | 2   | 6     |                                                      |     |      |      |     |     |     | WD    | WD                |
| B*39:69                                                 | 39:69          | HLA07472  |                                               | 0   | 0   | 1    | 0    | 0   | 0   | 0   | 1     |                                                      |     |      |      |     |     |     |       |                   |
| B*39:70                                                 | 39:70          | HLA07663  |                                               | 0   | 0   | 0    | 0    | 1   | 0   | 0   | 1     |                                                      |     |      |      |     |     |     |       |                   |
| B*39:71                                                 | 39:71          | HLA07664  |                                               | 0   | 0   | 2    | 0    | 0   | 0   | 0   | 2     |                                                      |     |      |      |     |     |     |       |                   |
| B*39:74                                                 | 39:74          | HLA08140  |                                               | 0   | 0   | 2    | 1    | 0   | 0   | 0   | 3     |                                                      |     |      |      |     |     |     |       |                   |
| B*39:75                                                 | 39:75          | HLA08142  |                                               | 0   | 0   | 0    | 0    | 6   | 0   | 0   | 6     |                                                      |     |      |      | WD  |     |     | WD    | WD                |
| B*39:78                                                 | 39:78          | HLA08469  |                                               | 0   | 0   | 1    | 0    | 0   | 0   | 0   | 1     |                                                      |     |      |      |     |     |     |       |                   |
| B*39:79                                                 | 39:79          | HLA08524  |                                               | 0   | 0   | 8    | 0    | 0   | 0   | 8   | 16    |                                                      |     | WD   |      |     |     | WD  | WD    | WD                |
| B*39:81                                                 | 39:81          | HLA09011  |                                               | 0   | 0   | 3    | 0    | 0   | 0   | 1   | 4     |                                                      |     |      |      |     |     |     |       |                   |
| B*39:82                                                 | 39:82          | HLA09173  |                                               | 0   | 0   | 2    | 0    | 0   | 0   | 0   | 2     |                                                      |     |      |      |     |     |     |       |                   |
| B*39:89                                                 | 39:89          | HLA11038  |                                               | 2   | 0   | 0    | 0    | 0   | 0   | 0   | 2     |                                                      |     |      |      |     |     |     |       |                   |
| B*39:90                                                 | 39:90          | HLA11436  |                                               | 0   | 0   | 0    | 0    | 0   | 0   | 1   | 1     |                                                      |     |      |      |     |     |     |       |                   |
| B*39:91                                                 | 39:91          | HLA11450  |                                               | 0   | 0   | 1    | 0    | 0   | 0   | 0   | 1     |                                                      |     |      |      |     |     |     |       |                   |
| B*39:93                                                 | 39:93          | HLA11718  |                                               | 0   | 0   | 10   | 0    | 0   | 0   | 0   | 10    |                                                      |     | WD   |      |     |     |     | WD    | WD                |
| B*39:96                                                 | 39:96          | HLA11845  |                                               | 0   | 0   | 0    | 0    | 0   | 0   | 2   | 2     |                                                      |     |      |      |     |     |     |       |                   |
| B*39:98                                                 | 39:98          | HLA12314  |                                               | 0   | 0   | 0    | 0    | 1   | 0   | 0   | 1     |                                                      |     |      |      |     |     |     |       |                   |
| B*39:101                                                | 39:101         | HLA12981  |                                               | 0   | 0   | 1    | 0    | 0   | 0   | 0   | 1     |                                                      |     |      |      |     |     |     |       |                   |
| B*39:102                                                | 39:102         | HLA13024  |                                               | 0   | 0   | 4    | 0    | 0   | 0   | 0   | 4     |                                                      |     |      |      |     |     |     |       |                   |
| B*39:105                                                | 39:105         | HLA13546  |                                               | 0   | 0   | 0    | 0    | 0   | 0   | 1   | 1     |                                                      |     |      |      |     |     |     |       |                   |
| B*39:106                                                | 39:106         | HLA13799  |                                               | 0   | 0   | 0    | 0    | 0   | 0   | 1   | 1     |                                                      |     |      |      |     |     |     |       |                   |
| B*39:107                                                | 39:107         | HLA13979  |                                               | 0   | 0   | 3    | 0    | 0   | 0   | 0   | 3     |                                                      |     |      |      |     |     |     |       |                   |

| Supplemental Table 9: HLA-B Allele Summary <sup>a</sup> |                        |           | Allele Count by Population Group <sup>b</sup> |             |              |               |             |             |             |              |               | 3.0.0 CIWD Category by Population Group <sup>c</sup> |          |          |          |          |          |          |          |                   |
|---------------------------------------------------------|------------------------|-----------|-----------------------------------------------|-------------|--------------|---------------|-------------|-------------|-------------|--------------|---------------|------------------------------------------------------|----------|----------|----------|----------|----------|----------|----------|-------------------|
| Allele                                                  | Genomic typing         | Allele ID | G group                                       | AFA         | API          | EURO          | MENA        | HIS         | NAM         | UNK          | Total         | AFA                                                  | API      | EURO     | MENA     | HIS      | NAM      | UNK      | Total    | Highest Frequency |
| B*39:111                                                | 39:111                 | HLA14449  |                                               | 0           | 0            | 2             | 0           | 0           | 0           | 0            | 2             |                                                      |          |          |          |          |          |          |          |                   |
| B*39:113                                                | 39:113                 | HLA14452  |                                               | 0           | 0            | 0             | 0           | 1           | 0           | 0            | 1             |                                                      |          |          |          |          |          |          |          |                   |
| B*39:121                                                | 39:121                 | HLA15773  |                                               | 0           | 0            | 1             | 0           | 0           | 0           | 0            | 1             |                                                      |          |          |          |          |          |          |          |                   |
| B*39:CODE                                               | 39:CODE                |           |                                               | 100         | 235          | 12528         | 83          | 2032        | 140         | 1550         | 16668         | NA                                                   | NA       | NA       | NA       | NA       | NA       | NA       | NA       | NA                |
| <b>B*40:01 total</b>                                    | <b>40:01 total</b>     |           |                                               | <b>3876</b> | <b>54309</b> | <b>511758</b> | <b>5551</b> | <b>9875</b> | <b>1487</b> | <b>50983</b> | <b>637839</b> | <b>C</b>                                             | <b>C</b> | <b>C</b> | <b>C</b> | <b>C</b> | <b>C</b> | <b>C</b> | <b>C</b> | <b>C</b>          |
| B*40:01                                                 | 40:01                  |           |                                               | 184         | 1678         | 5550          | 28          | 584         | 60          | 1853         | 9937          | C                                                    | C        | C        | WD       | C        | C        | C        | C        | C                 |
| B*40:01P                                                | 40:01P                 |           |                                               | 0           | 0            | 158           | 0           | 4           | 0           | 2            | 164           |                                                      |          | I        |          |          |          |          | I        | I                 |
| <b>B*40:01:01G total</b>                                | <b>40:01:01G total</b> |           |                                               | <b>3691</b> | <b>52623</b> | <b>505760</b> | <b>5521</b> | <b>9285</b> | <b>1426</b> | <b>49102</b> | <b>627408</b> | <b>C</b>                                             | <b>C</b> | <b>C</b> | <b>C</b> | <b>C</b> | <b>C</b> | <b>C</b> | <b>C</b> | <b>C</b>          |
| B*40:01:01G                                             | 40:01:01G              |           | 40:01:01G                                     | 3024        | 46801        | 481395        | 5378        | 7001        | 1155        | 45242        | 589996        | C                                                    | C        | C        | C        | C        | C        | C        | C        | C                 |
| B*40:01:01                                              | 40:01:01               | HLA00291  | 40:01:01G                                     | 0           | 0            | 2             | 0           | 0           | 0           | 1            | 3             |                                                      |          |          |          |          |          |          |          |                   |
| B*40:01:02                                              | 40:01:02               |           | 40:01:01G                                     | 667         | 5811         | 24337         | 143         | 2284        | 271         | 3858         | 37371         | C                                                    | C        | C        | C        | C        | C        | C        | C        | C                 |
| B*40:01:02:01                                           | 40:01:02:01            | HLA00292  | 40:01:01G                                     | 0           | 0            | 21            | 0           | 0           | 0           | 0            | 21            |                                                      |          | WD       |          |          |          |          | WD       | WD                |
| B*40:01:25                                              | 40:01:25               | HLA07925  | 40:01:01G                                     | 0           | 1            | 0             | 0           | 0           | 0           | 0            | 1             |                                                      |          |          |          |          |          |          |          |                   |
| B*40:01:42                                              | 40:01:42               | HLA13218  | 40:01:01G                                     | 0           | 1            | 0             | 0           | 0           | 0           | 0            | 1             |                                                      |          |          |          |          |          |          |          |                   |
| B*40:01:45                                              | 40:01:45               | HLA14634  | 40:01:01G                                     | 0           | 1            | 0             | 0           | 0           | 0           | 0            | 1             |                                                      |          |          |          |          |          |          |          |                   |
| B*40:01:48                                              | 40:01:48               | HLA15629  | 40:01:01G                                     | 0           | 0            | 4             | 0           | 0           | 0           | 0            | 4             |                                                      |          |          |          |          |          |          |          |                   |
| B*40:55                                                 | 40:55                  | HLA01993  | 40:01:01G                                     | 0           | 7            | 0             | 0           | 0           | 0           | 1            | 8             |                                                      | WD       |          |          |          |          |          | WD       | WD                |
| B*40:150                                                | 40:150                 | HLA05803  | 40:01:01G                                     | 0           | 1            | 1             | 0           | 0           | 0           | 0            | 2             |                                                      |          |          |          |          |          |          |          |                   |
| B*40:01:03                                              | 40:01:03               | HLA01450  |                                               | 0           | 1            | 80            | 1           | 0           | 0           | 11           | 93            |                                                      |          | WD       |          |          |          | WD       | WD       | WD                |
| B*40:01:04                                              | 40:01:04               | HLA01800  |                                               | 1           | 3            | 145           | 1           | 1           | 1           | 12           | 164           |                                                      |          | I        |          |          |          | WD       | I        | I                 |
| B*40:01:05                                              | 40:01:05               | HLA01921  |                                               | 0           | 0            | 7             | 0           | 0           | 0           | 0            | 7             |                                                      |          | WD       |          |          |          |          | WD       | WD                |
| B*40:01:07                                              | 40:01:07               | HLA04070  |                                               | 0           | 0            | 21            | 0           | 1           | 0           | 0            | 22            |                                                      |          | WD       |          |          |          |          | WD       | WD                |
| B*40:01:08                                              | 40:01:08               | HLA04170  |                                               | 0           | 0            | 1             | 0           | 0           | 0           | 0            | 1             |                                                      |          |          |          |          |          |          |          |                   |
| B*40:01:15                                              | 40:01:15               | HLA05520  |                                               | 0           | 0            | 1             | 0           | 0           | 0           | 0            | 1             |                                                      |          |          |          |          |          |          |          |                   |
| B*40:01:18                                              | 40:01:18               | HLA05924  |                                               | 0           | 0            | 6             | 0           | 0           | 0           | 0            | 6             |                                                      |          | WD       |          |          |          |          | WD       | WD                |
| B*40:01:20                                              | 40:01:20               | HLA06253  |                                               | 0           | 0            | 1             | 0           | 0           | 0           | 0            | 1             |                                                      |          |          |          |          |          |          |          |                   |
| B*40:01:21                                              | 40:01:21               | HLA06695  |                                               | 0           | 0            | 15            | 0           | 0           | 0           | 0            | 15            |                                                      |          | WD       |          |          |          |          | WD       | WD                |
| B*40:01:23                                              | 40:01:23               | HLA06973  |                                               | 0           | 0            | 8             | 0           | 0           | 0           | 0            | 8             |                                                      |          | WD       |          |          |          |          | WD       | WD                |
| B*40:01:24                                              | 40:01:24               | HLA07439  |                                               | 0           | 0            | 4             | 0           | 0           | 0           | 1            | 5             |                                                      |          |          |          |          |          |          | WD       | WD                |
| B*40:01:27                                              | 40:01:27               | HLA08439  |                                               | 0           | 0            | 1             | 0           | 0           | 0           | 1            | 2             |                                                      |          |          |          |          |          |          |          |                   |
| B*40:01:32                                              | 40:01:32               | HLA10484  |                                               | 0           | 1            | 0             | 0           | 0           | 0           | 0            | 1             |                                                      |          |          |          |          |          |          |          |                   |

| Supplemental Table 9: HLA-B Allele Summary <sup>a</sup> |                        |           | Allele Count by Population Group <sup>b</sup> |             |              |               |             |              |             |              |               | 3.0.0 CIWD Category by Population Group <sup>c</sup> |          |           |          |          |          |          |          |                   |
|---------------------------------------------------------|------------------------|-----------|-----------------------------------------------|-------------|--------------|---------------|-------------|--------------|-------------|--------------|---------------|------------------------------------------------------|----------|-----------|----------|----------|----------|----------|----------|-------------------|
| Allele                                                  | Genomic typing         | Allele ID | G group                                       | AFA         | API          | EURO          | MENA        | HIS          | NAM         | UNK          | Total         | AFA                                                  | API      | EURO      | MENA     | HIS      | NAM      | UNK      | Total    | Highest Frequency |
| B*40:01:40                                              | 40:01:40               | HLA11931  |                                               | 0           | 3            | 0             | 0           | 0            | 0           | 1            | 4             |                                                      |          |           |          |          |          |          |          |                   |
| <b>B*40:02 total</b>                                    | <b>40:02 total</b>     |           |                                               | <b>1602</b> | <b>12986</b> | <b>176388</b> | <b>3414</b> | <b>29900</b> | <b>2526</b> | <b>20365</b> | <b>247181</b> | <b>C</b>                                             | <b>C</b> | <b>C</b>  | <b>C</b> | <b>C</b> | <b>C</b> | <b>C</b> | <b>C</b> | <b>C</b>          |
| B*40:02                                                 | 40:02                  |           |                                               | 0           | 5            | 853           | 0           | 8            | 0           | 29           | 895           |                                                      | WD       | I         |          | I        |          | I        | I        | I                 |
| B*40:02P                                                | 40:02P                 |           |                                               | 0           | 0            | 204           | 0           | 1            | 0           | 1            | 206           |                                                      |          | I         |          |          |          |          | I        | I                 |
| <b>B*40:02:01G total</b>                                | <b>40:02:01G total</b> |           |                                               | <b>1602</b> | <b>12978</b> | <b>175279</b> | <b>3414</b> | <b>29888</b> | <b>2526</b> | <b>20332</b> | <b>246019</b> | <b>C</b>                                             | <b>C</b> | <b>C</b>  | <b>C</b> | <b>C</b> | <b>C</b> | <b>C</b> | <b>C</b> | <b>C</b>          |
| B*40:02:01G                                             | 40:02:01G              |           | 40:02:01G                                     | 1317        | 10851        | 169314        | 3346        | 22662        | 1905        | 18557        | 227952        | C                                                    | C        | C         | C        | C        | C        | C        | C        | C                 |
| B*40:02:01                                              | 40:02:01               |           | 40:02:01G                                     | 285         | 2125         | 5957          | 68          | 7215         | 621         | 1773         | 18044         | C                                                    | C        | C         | C        | C        | C        | C        | C        | C                 |
| B*40:02:01:01                                           | 40:02:01:01            | HLA00293  | 40:02:01G                                     | 0           | 0            | 4             | 0           | 0            | 0           | 0            | 4             |                                                      |          |           |          |          |          |          |          |                   |
| B*40:97                                                 | 40:97                  | HLA03746  | 40:02:01G                                     | 0           | 1            | 0             | 0           | 0            | 0           | 1            | 2             |                                                      |          |           |          |          |          |          |          |                   |
| B*40:176                                                | 40:176                 | HLA07286  | 40:02:01G                                     | 0           | 1            | 0             | 0           | 11           | 0           | 1            | 13            |                                                      |          |           |          | I        |          |          | WD       | I                 |
| B*40:303                                                | 40:303                 | HLA13250  | 40:02:01G                                     | 0           | 0            | 4             | 0           | 0            | 0           | 0            | 4             |                                                      |          |           |          |          |          |          |          |                   |
| B*40:02:05                                              | 40:02:05               | HLA03757  |                                               | 0           | 1            | 0             | 0           | 0            | 0           | 0            | 1             |                                                      |          |           |          |          |          |          |          |                   |
| B*40:02:06                                              | 40:02:06               | HLA04174  |                                               | 0           | 0            | 13            | 0           | 0            | 0           | 0            | 13            |                                                      |          | WD        |          |          |          |          | WD       | WD                |
| B*40:02:07                                              | 40:02:07               | HLA04220  |                                               | 0           | 1            | 2             | 0           | 0            | 0           | 0            | 3             |                                                      |          |           |          |          |          |          |          |                   |
| B*40:02:08                                              | 40:02:08               | HLA04543  |                                               | 0           | 0            | 4             | 0           | 0            | 0           | 0            | 4             |                                                      |          |           |          |          |          |          |          |                   |
| B*40:02:10                                              | 40:02:10               | HLA04818  |                                               | 0           | 0            | 3             | 0           | 0            | 0           | 0            | 3             |                                                      |          |           |          |          |          |          |          |                   |
| B*40:02:14                                              | 40:02:14               | HLA07687  |                                               | 0           | 0            | 21            | 0           | 0            | 0           | 0            | 21            |                                                      |          | WD        |          |          |          |          | WD       | WD                |
| B*40:02:16                                              | 40:02:16               | HLA08328  |                                               | 0           | 0            | 7             | 0           | 0            | 0           | 1            | 8             |                                                      |          | WD        |          |          |          |          | WD       | WD                |
| B*40:02:17                                              | 40:02:17               | HLA08503  |                                               | 0           | 0            | 0             | 0           | 0            | 0           | 2            | 2             |                                                      |          |           |          |          |          |          |          |                   |
| B*40:02:21                                              | 40:02:21               | HLA11646  |                                               | 0           | 1            | 0             | 0           | 0            | 0           | 0            | 1             |                                                      |          |           |          |          |          |          |          |                   |
| B*40:02:22                                              | 40:02:22               | HLA11745  |                                               | 0           | 0            | 2             | 0           | 0            | 0           | 0            | 2             |                                                      |          |           |          |          |          |          |          |                   |
| B*40:02:23                                              | 40:02:23               | HLA12127  |                                               | 0           | 0            | 0             | 0           | 3            | 0           | 0            | 3             |                                                      |          |           |          |          |          |          |          |                   |
| <b>B*40:03 total</b>                                    | <b>40:03 total</b>     |           |                                               | <b>6</b>    | <b>504</b>   | <b>33</b>     | <b>4</b>    | <b>110</b>   | <b>28</b>   | <b>139</b>   | <b>824</b>    | <b>WD</b>                                            | <b>C</b> | <b>WD</b> |          | <b>C</b> | <b>C</b> | <b>C</b> | <b>I</b> | <b>C</b>          |
| <b>B*40:03:01G total</b>                                | <b>40:03:01G total</b> |           |                                               | <b>6</b>    | <b>504</b>   | <b>33</b>     | <b>4</b>    | <b>110</b>   | <b>28</b>   | <b>139</b>   | <b>824</b>    | <b>WD</b>                                            | <b>C</b> | <b>WD</b> |          | <b>C</b> | <b>C</b> | <b>C</b> | <b>I</b> | <b>C</b>          |
| B*40:03                                                 | 40:03                  |           | 40:03:01G                                     | 3           | 286          | 13            | 1           | 56           | 21          | 90           | 470           |                                                      | C        | WD        |          | I        | C        | I        | I        | C                 |
| B*40:03:01G                                             | 40:03:01G              |           | 40:03:01G                                     | 3           | 218          | 20            | 3           | 54           | 7           | 49           | 354           |                                                      | C        | WD        |          | I        | C        | I        | I        | C                 |
| B*40:04                                                 | 40:04                  | HLA00295  |                                               | 87          | 15           | 506           | 1           | 1806         | 234         | 792          | 3441          | C                                                    | I        | I         |          | C        | C        | C        | C        | C                 |
| <b>B*40:05 total</b>                                    | <b>40:05 total</b>     |           |                                               | <b>31</b>   | <b>33</b>    | <b>247</b>    | <b>4</b>    | <b>3272</b>  | <b>172</b>  | <b>522</b>   | <b>4281</b>   | <b>WD</b>                                            | <b>I</b> | <b>I</b>  |          | <b>C</b> | <b>C</b> | <b>C</b> | <b>C</b> | <b>C</b>          |
| <b>B*40:05:01G total</b>                                | <b>40:05:01G total</b> |           |                                               | <b>31</b>   | <b>33</b>    | <b>247</b>    | <b>4</b>    | <b>3272</b>  | <b>172</b>  | <b>522</b>   | <b>4281</b>   | <b>WD</b>                                            | <b>I</b> | <b>I</b>  |          | <b>C</b> | <b>C</b> | <b>C</b> | <b>C</b> | <b>C</b>          |
| B*40:05                                                 | 40:05                  |           | 40:05:01G                                     | 29          | 28           | 237           | 4           | 3092         | 164         | 485          | 4039          | WD                                                   | I        | I         |          | C        | C        | C        | C        | C                 |
| B*40:05:01G                                             | 40:05:01G              |           | 40:05:01G                                     | 0           | 0            | 6             | 0           | 62           | 0           | 28           | 96            |                                                      |          | WD        |          | I        |          | I        | WD       | I                 |

| Supplemental Table 9: HLA-B Allele Summary <sup>a</sup> |                        |           |           | Allele Count by Population Group <sup>b</sup> |               |             |             |            |            |             |               | 3.0.0 CIWD Category by Population Group <sup>c</sup> |           |           |          |           |          |           |           |                   |
|---------------------------------------------------------|------------------------|-----------|-----------|-----------------------------------------------|---------------|-------------|-------------|------------|------------|-------------|---------------|------------------------------------------------------|-----------|-----------|----------|-----------|----------|-----------|-----------|-------------------|
| Allele                                                  | Genomic typing         | Allele ID | G group   | AFA                                           | API           | EURO        | MENA        | HIS        | NAM        | UNK         | Total         | AFA                                                  | API       | EURO      | MENA     | HIS       | NAM      | UNK       | Total     | Highest Frequency |
| B*40:05:01                                              | 40:05:01               |           | 40:05:01G | 0                                             | 0             | 0           | 0           | 8          | 1          | 0           | 9             |                                                      |           |           |          | I         |          |           | WD        | I                 |
| B*40:05:01:01                                           | 40:05:01:01            | HLA00296  | 40:05:01G | 2                                             | 5             | 4           | 0           | 110        | 7          | 9           | 137           |                                                      | WD        |           |          | C         | C        | WD        | WD        | C                 |
| <b>B*40:06 total</b>                                    | <b>40:06 total</b>     |           |           | <b>325</b>                                    | <b>102239</b> | <b>5556</b> | <b>3143</b> | <b>756</b> | <b>306</b> | <b>3600</b> | <b>115925</b> | <b>C</b>                                             | <b>C</b>  | <b>C</b>  | <b>C</b> | <b>C</b>  | <b>C</b> | <b>C</b>  | <b>C</b>  | <b>C</b>          |
| B*40:06                                                 | 40:06                  |           |           | 167                                           | 8684          | 1262        | 654         | 436        | 212        | 1819        | 13234         | C                                                    | C         | C         | C        | C         | C        | C         | C         | C                 |
| B*40:06P                                                | 40:06P                 |           |           | 0                                             | 2             | 9           | 0           | 0          | 0          | 0           | 11            |                                                      |           | WD        |          |           |          |           | WD        | WD                |
| <b>B*40:06:01G total</b>                                | <b>40:06:01G total</b> |           |           | <b>158</b>                                    | <b>93547</b>  | <b>4285</b> | <b>2489</b> | <b>320</b> | <b>94</b>  | <b>1781</b> | <b>102674</b> | <b>C</b>                                             | <b>C</b>  | <b>C</b>  | <b>C</b> | <b>C</b>  | <b>C</b> | <b>C</b>  | <b>C</b>  | <b>C</b>          |
| B*40:06:01G                                             | 40:06:01G              |           | 40:06:01G | 114                                           | 89168         | 3989        | 2346        | 178        | 29         | 1421        | 97245         | C                                                    | C         | C         | C        | C         | C        | C         | C         | C                 |
| B*40:06:01                                              | 40:06:01               |           | 40:06:01G | 3                                             | 141           | 78          | 31          | 4          | 5          | 22          | 284           |                                                      | C         | WD        | WD       |           | WD       | I         | I         | C                 |
| B*40:06:01:01                                           | 40:06:01:01            | HLA00297  | 40:06:01G | 1                                             | 888           | 13          | 1           | 9          | 0          | 148         | 1060          |                                                      | C         | WD        |          | I         |          | C         | I         | C                 |
| B*40:06:01:02                                           | 40:06:01:02            | HLA01430  | 40:06:01G | 39                                            | 3100          | 203         | 110         | 126        | 56         | 185         | 3819          | C                                                    | C         | I         | C        | C         | C        | C         | C         | C                 |
| B*40:06:03                                              | 40:06:03               | HLA05355  | 40:06:01G | 0                                             | 1             | 0           | 0           | 0          | 0          | 0           | 1             |                                                      |           |           |          |           |          |           |           |                   |
| B*40:06:04                                              | 40:06:04               |           | 40:06:01G | 1                                             | 249           | 2           | 1           | 3          | 4          | 5           | 265           |                                                      | C         |           |          |           |          | WD        | I         | C                 |
| B*40:06:09                                              | 40:06:09               | HLA11224  |           | 0                                             | 2             | 0           | 0           | 0          | 0          | 0           | 2             |                                                      |           |           |          |           |          |           |           |                   |
| B*40:06:12                                              | 40:06:12               | HLA13739  |           | 0                                             | 3             | 0           | 0           | 0          | 0          | 0           | 3             |                                                      |           |           |          |           |          |           |           |                   |
| B*40:06:14                                              | 40:06:14               | HLA13968  |           | 0                                             | 1             | 0           | 0           | 0          | 0          | 0           | 1             |                                                      |           |           |          |           |          |           |           |                   |
| B*40:07                                                 | 40:07                  | HLA00298  |           | 0                                             | 2             | 83          | 2           | 1          | 0          | 2           | 90            |                                                      |           | WD        |          |           |          |           | WD        | WD                |
| B*40:08                                                 | 40:08                  | HLA00299  |           | 32                                            | 22            | 168         | 4           | 2330       | 158        | 420         | 3134          | WD                                                   | I         | I         |          | C         | C        | C         | C         | C                 |
| B*40:09                                                 | 40:09                  | HLA00300  |           | 0                                             | 0             | 12          | 0           | 14         | 0          | 19          | 45            |                                                      |           | WD        |          | I         |          | I         | WD        | I                 |
| <b>B*40:10 total</b>                                    | <b>40:10 total</b>     |           |           | <b>2</b>                                      | <b>560</b>    | <b>34</b>   | <b>3</b>    | <b>6</b>   | <b>0</b>   | <b>373</b>  | <b>978</b>    |                                                      | <b>C</b>  | <b>WD</b> |          | <b>WD</b> |          | <b>C</b>  | <b>I</b>  | <b>C</b>          |
| B*40:10                                                 | 40:10                  |           |           | 0                                             | 34            | 2           | 0           | 1          | 0          | 22          | 59            |                                                      | I         |           |          |           |          | I         | WD        | I                 |
| <b>B*40:10:01G total</b>                                | <b>40:10:01G total</b> |           |           | <b>2</b>                                      | <b>526</b>    | <b>32</b>   | <b>3</b>    | <b>5</b>   | <b>0</b>   | <b>351</b>  | <b>919</b>    |                                                      | <b>C</b>  | <b>WD</b> |          | <b>WD</b> |          | <b>C</b>  | <b>I</b>  | <b>C</b>          |
| B*40:10:01G                                             | 40:10:01G              |           | 40:10:01G | 0                                             | 42            | 11          | 0           | 0          | 0          | 22          | 75            |                                                      | I         | WD        |          |           |          | I         | WD        | I                 |
| B*40:10:01                                              | 40:10:01               |           | 40:10:01G | 2                                             | 389           | 20          | 3           | 4          | 0          | 276         | 694           |                                                      | C         | WD        |          |           |          | C         | I         | C                 |
| B*40:10:01:02                                           | 40:10:01:02            | HLA13770  | 40:10:01G | 0                                             | 95            | 1           | 0           | 1          | 0          | 53          | 150           |                                                      | I         |           |          |           |          | I         | WD        | I                 |
| <b>B*40:11 total</b>                                    | <b>40:11 total</b>     |           |           | <b>18</b>                                     | <b>10</b>     | <b>70</b>   | <b>0</b>    | <b>903</b> | <b>44</b>  | <b>151</b>  | <b>1196</b>   | <b>WD</b>                                            | <b>WD</b> | <b>WD</b> |          | <b>C</b>  | <b>C</b> | <b>C</b>  | <b>I</b>  | <b>C</b>          |
| B*40:11                                                 | 40:11                  |           |           | 2                                             | 0             | 8           | 0           | 86         | 6          | 6           | 108           |                                                      |           | WD        |          | C         | WD       | WD        | WD        | C                 |
| B*40:11:01                                              | 40:11:01               | HLA00302  |           | 15                                            | 9             | 61          | 0           | 812        | 38         | 143         | 1078          | WD                                                   | WD        | WD        |          | C         | C        | C         | I         | C                 |
| B*40:11:02                                              | 40:11:02               | HLA05126  |           | 1                                             | 1             | 1           | 0           | 5          | 0          | 2           | 10            |                                                      |           |           |          | WD        |          |           | WD        | WD                |
| B*40:12                                                 | 40:12                  | HLA00303  |           | 336                                           | 3             | 133         | 121         | 16         | 4          | 59          | 672           | C                                                    |           | I         | C        | I         |          | I         | I         | C                 |
| B*40:13                                                 | 40:13                  | HLA00304  |           | 0                                             | 1             | 151         | 0           | 145        | 0          | 175         | 472           |                                                      |           | I         |          | C         |          | C         | I         | C                 |
| <b>B*40:14 total</b>                                    | <b>40:14 total</b>     |           |           | <b>0</b>                                      | <b>0</b>      | <b>64</b>   | <b>0</b>    | <b>1</b>   | <b>0</b>   | <b>6</b>    | <b>71</b>     |                                                      |           | <b>WD</b> |          |           |          | <b>WD</b> | <b>WD</b> | <b>WD</b>         |

| Supplemental Table 9: HLA-B Allele Summary <sup>a</sup> |                        |           | Allele Count by Population Group <sup>b</sup> |           |           |           |          |             |           |            |             | 3.0.0 CIWD Category by Population Group <sup>c</sup> |          |           |      |          |          |          |           |                   |   |
|---------------------------------------------------------|------------------------|-----------|-----------------------------------------------|-----------|-----------|-----------|----------|-------------|-----------|------------|-------------|------------------------------------------------------|----------|-----------|------|----------|----------|----------|-----------|-------------------|---|
| Allele                                                  | Genomic typing         | Allele ID | G group                                       | AFA       | API       | EURO      | MENA     | HIS         | NAM       | UNK        | Total       | AFA                                                  | API      | EURO      | MENA | HIS      | NAM      | UNK      | Total     | Highest Frequency |   |
| B*40:14                                                 | 40:14                  |           |                                               | 0         | 0         | 5         | 0        | 0           | 0         | 0          | 5           |                                                      |          | WD        |      |          |          |          | WD        | WD                |   |
| B*40:14:01                                              | 40:14:01               | HLA00305  |                                               | 0         | 0         | 1         | 0        | 0           | 0         | 0          | 1           |                                                      |          |           |      |          |          |          |           |                   |   |
| B*40:14:02                                              | 40:14:02               | HLA01667  |                                               | 0         | 0         | 31        | 0        | 0           | 0         | 0          | 31          |                                                      |          | WD        |      |          |          |          | WD        | WD                |   |
| B*40:14:03                                              | 40:14:03               | HLA01816  |                                               | 0         | 0         | 27        | 0        | 1           | 0         | 6          | 34          |                                                      |          | WD        |      |          |          | WD       | WD        | WD                |   |
| B*40:16                                                 | 40:16                  | HLA00307  |                                               | 392       | 3         | 34        | 12       | 106         | 10        | 111        | 668         | C                                                    |          | WD        | WD   | C        | C        | I        | I         | C                 |   |
| B*40:18                                                 | 40:18                  | HLA00309  |                                               | 0         | 0         | 5         | 0        | 0           | 0         | 0          | 5           |                                                      |          | WD        |      |          |          |          | WD        | WD                |   |
| B*40:19                                                 | 40:19                  | HLA00310  |                                               | 0         | 0         | 29        | 0        | 1           | 0         | 3          | 33          |                                                      |          | WD        |      |          |          |          | WD        | WD                |   |
| <b>B*40:20 total</b>                                    | <b>40:20 total</b>     |           |                                               | <b>3</b>  | <b>1</b>  | <b>19</b> | <b>1</b> | <b>196</b>  | <b>11</b> | <b>31</b>  | <b>262</b>  |                                                      |          | <b>WD</b> |      | <b>C</b> | <b>C</b> | <b>I</b> | <b>I</b>  | <b>C</b>          |   |
| <b>B*40:20:01G total</b>                                | <b>40:20:01G total</b> |           |                                               | <b>3</b>  | <b>1</b>  | <b>19</b> | <b>1</b> | <b>196</b>  | <b>11</b> | <b>31</b>  | <b>262</b>  |                                                      |          | <b>WD</b> |      | <b>C</b> | <b>C</b> | <b>I</b> | <b>I</b>  | <b>C</b>          |   |
| B*40:20                                                 | 40:20                  |           | 40:20:01G                                     | 3         | 1         | 19        | 1        | 196         | 11        | 31         | 262         |                                                      |          | WD        |      | C        | C        | I        | I         | C                 |   |
| B*40:21                                                 | 40:21                  | HLA00983  |                                               | 0         | 1         | 3         | 0        | 0           | 0         | 1          | 5           |                                                      |          |           |      |          |          |          | WD        | WD                |   |
| B*40:22N                                                | 40:22N                 | HLA00984  |                                               | 0         | 0         | 4         | 0        | 0           | 0         | 1          | 5           |                                                      |          |           |      |          |          |          | WD        | WD                |   |
| B*40:23                                                 | 40:23                  | HLA01062  |                                               | 2         | 996       | 16        | 4        | 0           | 2         | 24         | 1044        |                                                      | C        | WD        |      |          |          |          | I         | I                 | C |
| B*40:25                                                 | 40:25                  | HLA01064  |                                               | 0         | 0         | 1         | 0        | 0           | 0         | 0          | 1           |                                                      |          |           |      |          |          |          |           |                   |   |
| B*40:26                                                 | 40:26                  | HLA01122  |                                               | 1         | 315       | 6         | 1        | 0           | 0         | 6          | 329         |                                                      | C        | WD        |      |          |          |          | WD        | I                 | C |
| <b>B*40:27 total</b>                                    | <b>40:27 total</b>     |           |                                               | <b>11</b> | <b>14</b> | <b>71</b> | <b>1</b> | <b>1109</b> | <b>35</b> | <b>143</b> | <b>1384</b> | <b>WD</b>                                            | <b>I</b> | <b>WD</b> |      | <b>C</b> | <b>C</b> | <b>C</b> | <b>I</b>  | <b>C</b>          |   |
| B*40:27                                                 | 40:27                  |           |                                               | 1         | 3         | 9         | 0        | 153         | 2         | 6          | 174         |                                                      |          | WD        |      | C        |          |          | WD        | I                 | C |
| B*40:27:01                                              | 40:27:01               | HLA01129  |                                               | 10        | 11        | 61        | 1        | 956         | 33        | 137        | 1209        | WD                                                   | WD       | WD        |      | C        | C        | C        | I         | C                 |   |
| B*40:27:02                                              | 40:27:02               | HLA05954  |                                               | 0         | 0         | 1         | 0        | 0           | 0         | 0          | 1           |                                                      |          |           |      |          |          |          |           |                   |   |
| B*40:28                                                 | 40:28                  | HLA01140  |                                               | 0         | 0         | 0         | 0        | 2           | 1         | 1          | 4           |                                                      |          |           |      |          |          |          |           |                   |   |
| B*40:29                                                 | 40:29                  | HLA01223  |                                               | 0         | 2         | 0         | 0        | 0           | 0         | 0          | 2           |                                                      |          |           |      |          |          |          |           |                   |   |
| B*40:30                                                 | 40:30                  | HLA01232  |                                               | 0         | 0         | 10        | 0        | 0           | 0         | 2          | 12          |                                                      |          | WD        |      |          |          |          | WD        | WD                |   |
| B*40:31                                                 | 40:31                  | HLA01246  |                                               | 0         | 0         | 24        | 0        | 1           | 0         | 3          | 28          |                                                      |          | WD        |      |          |          |          | WD        | WD                |   |
| B*40:32                                                 | 40:32                  | HLA01269  |                                               | 1         | 2         | 155       | 0        | 0           | 2         | 4          | 164         |                                                      |          | I         |      |          |          |          | I         | I                 |   |
| B*40:33                                                 | 40:33                  | HLA01287  |                                               | 0         | 0         | 4         | 0        | 0           | 0         | 0          | 4           |                                                      |          |           |      |          |          |          |           |                   |   |
| <b>B*40:35 total</b>                                    | <b>40:35 total</b>     |           |                                               | <b>0</b>  | <b>0</b>  | <b>4</b>  | <b>2</b> | <b>0</b>    | <b>0</b>  | <b>1</b>   | <b>7</b>    |                                                      |          |           |      |          |          |          | <b>WD</b> | <b>WD</b>         |   |
| B*40:35:01                                              | 40:35:01               | HLA01329  |                                               | 0         | 0         | 3         | 2        | 0           | 0         | 1          | 6           |                                                      |          |           |      |          |          |          | WD        | WD                |   |
| B*40:35:02                                              | 40:35:02               | HLA10999  |                                               | 0         | 0         | 1         | 0        | 0           | 0         | 0          | 1           |                                                      |          |           |      |          |          |          |           |                   |   |
| B*40:36                                                 | 40:36                  | HLA01482  |                                               | 0         | 0         | 0         | 0        | 1           | 0         | 0          | 1           |                                                      |          |           |      |          |          |          |           |                   |   |
| B*40:37                                                 | 40:37                  | HLA01488  |                                               | 0         | 0         | 0         | 0        | 2           | 0         | 1          | 3           |                                                      |          |           |      |          |          |          |           |                   |   |
| B*40:38                                                 | 40:38                  | HLA01490  |                                               | 0         | 2         | 1         | 0        | 0           | 0         | 1          | 4           |                                                      |          |           |      |          |          |          |           |                   |   |

| Supplemental Table 9: HLA-B Allele Summary <sup>a</sup> |                        |           | Allele Count by Population Group <sup>b</sup> |     |     |      |      |     |     |     |       | 3.0.0 CIWD Category by Population Group <sup>c</sup> |     |      |      |     |     |     |       |                   |
|---------------------------------------------------------|------------------------|-----------|-----------------------------------------------|-----|-----|------|------|-----|-----|-----|-------|------------------------------------------------------|-----|------|------|-----|-----|-----|-------|-------------------|
| Allele                                                  | Genomic typing         | Allele ID | G group                                       | AFA | API | EURO | MENA | HIS | NAM | UNK | Total | AFA                                                  | API | EURO | MENA | HIS | NAM | UNK | Total | Highest Frequency |
| <b>B*40:40 total</b>                                    | <b>40:40 total</b>     |           |                                               | 0   | 55  | 4    | 4    | 1   | 1   | 6   | 71    | I                                                    |     |      |      |     |     | WD  | WD    | I                 |
| <b>B*40:40:01G total</b>                                | <b>40:40:01G total</b> |           |                                               | 0   | 55  | 4    | 4    | 1   | 1   | 6   | 71    | I                                                    |     |      |      |     |     | WD  | WD    | I                 |
| B*40:40                                                 | 40:40                  | HLA01510  | 40:40:01G                                     | 0   | 8   | 2    | 1    | 1   | 0   | 2   | 14    | WD                                                   |     |      |      |     |     |     | WD    | WD                |
| B*40:40:01G                                             | 40:40:01G              |           | 40:40:01G                                     | 0   | 38  | 2    | 3    | 0   | 1   | 4   | 48    | I                                                    |     |      |      |     |     |     | WD    | I                 |
| B*40:229                                                | 40:229                 | HLA08928  | 40:40:01G                                     | 0   | 9   | 0    | 0    | 0   | 0   | 0   | 9     | WD                                                   |     |      |      |     |     |     | WD    | WD                |
| B*40:42                                                 | 40:42                  | HLA01527  |                                               | 0   | 0   | 103  | 0    | 0   | 0   | 5   | 108   |                                                      |     | WD   |      |     |     | WD  | WD    | WD                |
| B*40:43                                                 | 40:43                  | HLA01600  |                                               | 0   | 3   | 8    | 2    | 2   | 0   | 0   | 15    |                                                      |     | WD   |      |     |     |     | WD    | WD                |
| B*40:44                                                 | 40:44                  | HLA01604  |                                               | 0   | 13  | 0    | 0    | 0   | 0   | 0   | 13    | I                                                    |     |      |      |     |     |     | WD    | I                 |
| B*40:46                                                 | 40:46                  | HLA01740  |                                               | 0   | 0   | 4    | 0    | 0   | 0   | 0   | 4     |                                                      |     |      |      |     |     |     |       |                   |
| B*40:47                                                 | 40:47                  | HLA01748  |                                               | 0   | 0   | 15   | 0    | 0   | 0   | 0   | 15    |                                                      |     | WD   |      |     |     |     | WD    | WD                |
| B*40:48                                                 | 40:48                  | HLA01765  |                                               | 0   | 11  | 0    | 0    | 0   | 0   | 2   | 13    | WD                                                   |     |      |      |     |     |     | WD    | WD                |
| B*40:49                                                 | 40:49                  | HLA01898  |                                               | 0   | 0   | 31   | 0    | 0   | 0   | 0   | 31    |                                                      |     | WD   |      |     |     |     | WD    | WD                |
| B*40:50                                                 | 40:50                  | HLA01899  |                                               | 1   | 592 | 7    | 8    | 1   | 2   | 18  | 629   | C                                                    | WD  | WD   |      |     |     | I   | I     | C                 |
| B*40:51                                                 | 40:51                  | HLA01919  |                                               | 0   | 0   | 1    | 0    | 0   | 0   | 0   | 1     |                                                      |     |      |      |     |     |     |       |                   |
| B*40:52                                                 | 40:52                  | HLA01976  |                                               | 0   | 4   | 5    | 0    | 0   | 0   | 2   | 11    |                                                      |     | WD   |      |     |     |     | WD    | WD                |
| B*40:53                                                 | 40:53                  | HLA01979  |                                               | 0   | 2   | 0    | 4    | 0   | 0   | 0   | 6     |                                                      |     |      |      |     |     |     | WD    | WD                |
| B*40:54                                                 | 40:54                  | HLA01992  |                                               | 0   | 3   | 0    | 0    | 0   | 0   | 1   | 4     |                                                      |     |      |      |     |     |     |       |                   |
| B*40:61                                                 | 40:61                  | HLA02249  |                                               | 0   | 5   | 0    | 0    | 0   | 0   | 0   | 5     | WD                                                   |     |      |      |     |     |     | WD    | WD                |
| B*40:62                                                 | 40:62                  | HLA02383  |                                               | 0   | 3   | 1    | 0    | 0   | 0   | 0   | 4     |                                                      |     |      |      |     |     |     |       |                   |
| B*40:63                                                 | 40:63                  | HLA02458  |                                               | 0   | 0   | 5    | 0    | 0   | 0   | 0   | 5     |                                                      |     | WD   |      |     |     |     | WD    | WD                |
| B*40:64                                                 | 40:64                  | HLA02482  |                                               | 1   | 0   | 44   | 0    | 64  | 3   | 29  | 141   |                                                      |     | WD   |      | I   |     | I   | WD    | I                 |
| B*40:67                                                 | 40:67                  | HLA02588  |                                               | 0   | 0   | 1    | 0    | 0   | 0   | 0   | 1     |                                                      |     |      |      |     |     |     |       |                   |
| B*40:69                                                 | 40:69                  | HLA02678  |                                               | 0   | 1   | 0    | 0    | 0   | 0   | 0   | 1     |                                                      |     |      |      |     |     |     |       |                   |
| <b>B*40:70 total</b>                                    | <b>40:70 total</b>     |           |                                               | 0   | 4   | 0    | 0    | 0   | 0   | 0   | 4     |                                                      |     |      |      |     |     |     |       |                   |
| B*40:70                                                 | 40:70                  |           |                                               | 0   | 1   | 0    | 0    | 0   | 0   | 0   | 1     |                                                      |     |      |      |     |     |     |       |                   |
| B*40:70:01                                              | 40:70:01               | HLA02693  |                                               | 0   | 3   | 0    | 0    | 0   | 0   | 0   | 3     |                                                      |     |      |      |     |     |     |       |                   |
| <b>B*40:72 total</b>                                    | <b>40:72 total</b>     |           |                                               | 0   | 0   | 21   | 0    | 0   | 0   | 2   | 23    |                                                      |     | WD   |      |     |     |     | WD    | WD                |
| B*40:72                                                 | 40:72                  |           |                                               | 0   | 0   | 1    | 0    | 0   | 0   | 0   | 1     |                                                      |     |      |      |     |     |     |       |                   |
| B*40:72:02                                              | 40:72:02               | HLA03344  |                                               | 0   | 0   | 20   | 0    | 0   | 0   | 2   | 22    |                                                      |     | WD   |      |     |     |     | WD    | WD                |
| B*40:73                                                 | 40:73                  | HLA02864  |                                               | 0   | 0   | 2    | 0    | 0   | 0   | 0   | 2     |                                                      |     |      |      |     |     |     |       |                   |
| B*40:74                                                 | 40:74                  | HLA02866  |                                               | 0   | 0   | 2    | 4    | 0   | 0   | 0   | 6     |                                                      |     |      |      |     |     |     | WD    | WD                |

| Supplemental Table 9: HLA-B Allele Summary <sup>a</sup> |                     |           | Allele Count by Population Group <sup>b</sup> |          |          |           |          |          |          |          |           | 3.0.0 CIWD Category by Population Group <sup>c</sup> |     |           |      |     |     |     |           |                   |
|---------------------------------------------------------|---------------------|-----------|-----------------------------------------------|----------|----------|-----------|----------|----------|----------|----------|-----------|------------------------------------------------------|-----|-----------|------|-----|-----|-----|-----------|-------------------|
| Allele                                                  | Genomic typing      | Allele ID | G group                                       | AFA      | API      | EURO      | MENA     | HIS      | NAM      | UNK      | Total     | AFA                                                  | API | EURO      | MENA | HIS | NAM | UNK | Total     | Highest Frequency |
| B*40:75                                                 | 40:75               | HLA02884  |                                               | 0        | 2        | 0         | 0        | 0        | 0        | 0        | 2         |                                                      |     |           |      |     |     |     |           |                   |
| B*40:76                                                 | 40:76               | HLA02906  |                                               | 0        | 1        | 0         | 0        | 0        | 0        | 1        | 2         |                                                      |     |           |      |     |     |     |           |                   |
| B*40:78                                                 | 40:78               | HLA02989  |                                               | 0        | 9        | 2         | 6        | 0        | 0        | 2        | 19        |                                                      | WD  |           | WD   |     |     |     | WD        | WD                |
| B*40:79                                                 | 40:79               | HLA03160  |                                               | 0        | 0        | 5         | 0        | 0        | 0        | 0        | 5         |                                                      |     | WD        |      |     |     |     | WD        | WD                |
| B*40:80                                                 | 40:80               | HLA03173  |                                               | 0        | 0        | 3         | 0        | 0        | 0        | 0        | 3         |                                                      |     |           |      |     |     |     |           |                   |
| B*40:81                                                 | 40:81               | HLA03205  |                                               | 0        | 1        | 0         | 0        | 0        | 0        | 1        | 2         |                                                      |     |           |      |     |     |     |           |                   |
| B*40:84                                                 | 40:84               | HLA03231  |                                               | 0        | 4        | 1         | 0        | 0        | 0        | 0        | 5         |                                                      |     |           |      |     |     |     | WD        | WD                |
| <b>B*40:87 total</b>                                    | <b>40:87 total</b>  |           |                                               | <b>0</b> | <b>0</b> | <b>12</b> | <b>0</b> | <b>0</b> | <b>0</b> | <b>0</b> | <b>12</b> |                                                      |     | <b>WD</b> |      |     |     |     | <b>WD</b> | <b>WD</b>         |
| B*40:87                                                 | 40:87               |           |                                               | 0        | 0        | 2         | 0        | 0        | 0        | 0        | 2         |                                                      |     |           |      |     |     |     |           |                   |
| B*40:87:01                                              | 40:87:01            | HLA03256  |                                               | 0        | 0        | 10        | 0        | 0        | 0        | 0        | 10        |                                                      |     | WD        |      |     |     |     | WD        | WD                |
| B*40:90                                                 | 40:90               | HLA03312  |                                               | 25       | 1        | 11        | 0        | 1        | 16       | 13       | 67        | WD                                                   |     | WD        |      |     | C   | WD  | WD        | C                 |
| B*40:94                                                 | 40:94               | HLA03584  |                                               | 1        | 0        | 67        | 1        | 0        | 0        | 3        | 72        |                                                      |     | WD        |      |     |     |     | WD        | WD                |
| B*40:95                                                 | 40:95               | HLA03628  |                                               | 0        | 17       | 0         | 0        | 0        | 0        | 0        | 17        |                                                      | I   |           |      |     |     |     | WD        | I                 |
| B*40:98                                                 | 40:98               | HLA03780  |                                               | 0        | 0        | 2         | 0        | 0        | 0        | 0        | 2         |                                                      |     |           |      |     |     |     |           |                   |
| B*40:99                                                 | 40:99               | HLA04387  |                                               | 0        | 0        | 0         | 0        | 4        | 0        | 2        | 6         |                                                      |     |           |      |     |     |     | WD        | WD                |
| B*40:102                                                | 40:102              | HLA04903  |                                               | 0        | 0        | 12        | 6        | 1        | 0        | 0        | 19        |                                                      |     | WD        | WD   |     |     |     | WD        | WD                |
| B*40:103                                                | 40:103              | HLA04912  |                                               | 0        | 0        | 0         | 5        | 0        | 0        | 0        | 5         |                                                      |     |           | WD   |     |     |     | WD        | WD                |
| B*40:105                                                | 40:105              | HLA04917  |                                               | 0        | 1        | 3         | 0        | 0        | 0        | 0        | 4         |                                                      |     |           |      |     |     |     |           |                   |
| B*40:107                                                | 40:107              | HLA04920  |                                               | 1        | 0        | 0         | 0        | 2        | 1        | 0        | 4         |                                                      |     |           |      |     |     |     |           |                   |
| B*40:108                                                | 40:108              | HLA05153  |                                               | 0        | 0        | 6         | 0        | 0        | 0        | 0        | 6         |                                                      |     | WD        |      |     |     |     | WD        | WD                |
| B*40:109                                                | 40:109              | HLA04930  |                                               | 0        | 3        | 0         | 0        | 0        | 0        | 0        | 3         |                                                      |     |           |      |     |     |     |           |                   |
| B*40:110                                                | 40:110              | HLA04880  |                                               | 0        | 10       | 0         | 0        | 0        | 0        | 0        | 10        |                                                      | WD  |           |      |     |     |     | WD        | WD                |
| B*40:111                                                | 40:111              | HLA04934  |                                               | 1        | 1        | 0         | 0        | 6        | 2        | 1        | 11        |                                                      |     |           |      | WD  |     |     | WD        | WD                |
| B*40:112                                                | 40:112              | HLA04937  |                                               | 0        | 1        | 0         | 0        | 0        | 0        | 0        | 1         |                                                      |     |           |      |     |     |     |           |                   |
| B*40:113                                                | 40:113              | HLA04939  |                                               | 0        | 0        | 6         | 0        | 0        | 0        | 0        | 6         |                                                      |     | WD        |      |     |     |     | WD        | WD                |
| <b>B*40:114 total</b>                                   | <b>40:114 total</b> |           |                                               | <b>0</b> | <b>1</b> | <b>19</b> | <b>0</b> | <b>0</b> | <b>0</b> | <b>2</b> | <b>22</b> |                                                      |     | <b>WD</b> |      |     |     |     | <b>WD</b> | <b>WD</b>         |
| B*40:114                                                | 40:114              |           |                                               | 0        | 1        | 7         | 0        | 0        | 0        | 0        | 8         |                                                      |     | WD        |      |     |     |     | WD        | WD                |
| B*40:114:01                                             | 40:114:01           | HLA04940  |                                               | 0        | 0        | 12        | 0        | 0        | 0        | 2        | 14        |                                                      |     | WD        |      |     |     |     | WD        | WD                |
| B*40:115                                                | 40:115              | HLA04947  |                                               | 0        | 24       | 0         | 1        | 0        | 0        | 0        | 25        |                                                      | I   |           |      |     |     |     | WD        | I                 |
| B*40:116                                                | 40:116              | HLA04977  |                                               | 0        | 0        | 3         | 0        | 0        | 0        | 0        | 3         |                                                      |     |           |      |     |     |     |           |                   |
| B*40:117                                                | 40:117              | HLA04979  |                                               | 0        | 1        | 4         | 0        | 2        | 0        | 0        | 7         |                                                      |     |           |      |     |     |     | WD        | WD                |



| Supplemental Table 9: HLA-B Allele Summary <sup>a</sup> |                         |           | Allele Count by Population Group <sup>b</sup> |          |          |          |          |          |          |          |           | 3.0.0 CIWD Category by Population Group <sup>c</sup> |           |      |      |     |     |           |           |                   |
|---------------------------------------------------------|-------------------------|-----------|-----------------------------------------------|----------|----------|----------|----------|----------|----------|----------|-----------|------------------------------------------------------|-----------|------|------|-----|-----|-----------|-----------|-------------------|
| Allele                                                  | Genomic typing          | Allele ID | G group                                       | AFA      | API      | EURO     | MENA     | HIS      | NAM      | UNK      | Total     | AFA                                                  | API       | EURO | MENA | HIS | NAM | UNK       | Total     | Highest Frequency |
| B*40:118N                                               | 40:118N                 | HLA04997  |                                               | 0        | 0        | 3        | 0        | 0        | 0        | 0        | 3         |                                                      |           |      |      |     |     |           |           |                   |
| B*40:119                                                | 40:119                  | HLA05010  |                                               | 0        | 0        | 1        | 0        | 1        | 0        | 3        | 5         |                                                      |           |      |      |     |     |           | WD        | WD                |
| B*40:120                                                | 40:120                  | HLA05011  |                                               | 0        | 0        | 3        | 0        | 0        | 0        | 0        | 3         |                                                      |           |      |      |     |     |           |           |                   |
| B*40:121                                                | 40:121                  | HLA05018  |                                               | 0        | 0        | 1        | 0        | 0        | 0        | 0        | 1         |                                                      |           |      |      |     |     |           |           |                   |
| B*40:122                                                | 40:122                  | HLA05021  |                                               | 0        | 3        | 0        | 0        | 0        | 0        | 0        | 3         |                                                      |           |      |      |     |     |           |           |                   |
| B*40:126                                                | 40:126                  | HLA04873  |                                               | 0        | 0        | 4        | 0        | 0        | 0        | 1        | 5         |                                                      |           |      |      |     |     |           | WD        | WD                |
| B*40:128                                                | 40:128                  | HLA04877  |                                               | 0        | 2        | 0        | 0        | 0        | 0        | 0        | 2         |                                                      |           |      |      |     |     |           |           |                   |
| B*40:129                                                | 40:129                  | HLA04878  |                                               | 0        | 0        | 0        | 0        | 6        | 0        | 3        | 9         |                                                      |           |      |      | WD  |     |           | WD        | WD                |
| <b>B*40:130 total</b>                                   | <b>40:130 total</b>     |           |                                               | <b>0</b> | <b>7</b> | <b>5</b> | <b>0</b> | <b>0</b> | <b>0</b> | <b>3</b> | <b>15</b> | <b>WD</b>                                            | <b>WD</b> |      |      |     |     | <b>WD</b> | <b>WD</b> |                   |
| B*40:130                                                | 40:130                  |           |                                               | 0        | 0        | 1        | 0        | 0        | 0        | 0        | 1         |                                                      |           |      |      |     |     |           |           |                   |
| B*40:130:01                                             | 40:130:01               | HLA04881  |                                               | 0        | 6        | 1        | 0        | 0        | 0        | 1        | 8         | WD                                                   |           |      |      |     |     |           | WD        | WD                |
| B*40:130:02                                             | 40:130:02               | HLA10521  |                                               | 0        | 1        | 3        | 0        | 0        | 0        | 2        | 6         |                                                      |           |      |      |     |     |           | WD        | WD                |
| B*40:131                                                | 40:131                  | HLA05050  |                                               | 0        | 2        | 0        | 0        | 0        | 0        | 0        | 2         |                                                      |           |      |      |     |     |           |           |                   |
| B*40:134                                                | 40:134                  | HLA05093  |                                               | 0        | 2        | 0        | 0        | 0        | 0        | 0        | 2         |                                                      |           |      |      |     |     |           |           |                   |
| B*40:135                                                | 40:135                  | HLA05096  |                                               | 0        | 0        | 3        | 0        | 0        | 1        | 2        | 6         |                                                      |           |      |      |     |     |           | WD        | WD                |
| B*40:142N                                               | 40:142N                 | HLA05284  |                                               | 0        | 1        | 4        | 0        | 0        | 0        | 0        | 5         |                                                      |           |      |      |     |     |           | WD        | WD                |
| B*40:145                                                | 40:145                  | HLA05305  |                                               | 0        | 0        | 1        | 0        | 0        | 0        | 0        | 1         |                                                      |           |      |      |     |     |           |           |                   |
| B*40:148                                                | 40:148                  | HLA05537  |                                               | 0        | 2        | 0        | 0        | 0        | 0        | 0        | 2         |                                                      |           |      |      |     |     |           |           |                   |
| <b>B*40:155N total</b>                                  | <b>40:155N total</b>    |           |                                               | <b>0</b> | <b>6</b> | <b>0</b> | <b>0</b> | <b>0</b> | <b>0</b> | <b>0</b> | <b>6</b>  | <b>WD</b>                                            |           |      |      |     |     |           | <b>WD</b> | <b>WD</b>         |
| <b>B*40:155:01G total</b>                               | <b>40:155:01G total</b> |           |                                               | <b>0</b> | <b>6</b> | <b>0</b> | <b>0</b> | <b>0</b> | <b>0</b> | <b>0</b> | <b>6</b>  | <b>WD</b>                                            |           |      |      |     |     |           | <b>WD</b> | <b>WD</b>         |
| B*40:155N                                               | 40:155N                 |           | 40:155:01C                                    | 0        | 2        | 0        | 0        | 0        | 0        | 0        | 2         |                                                      |           |      |      |     |     |           |           |                   |
| B*40:155:01G                                            | 40:155:01G              |           | 40:155:01C                                    | 0        | 1        | 0        | 0        | 0        | 0        | 0        | 1         |                                                      |           |      |      |     |     |           |           |                   |
| B*40:155:02N                                            | 40:155:02N              | HLA11085  | 40:155:01C                                    | 0        | 3        | 0        | 0        | 0        | 0        | 0        | 3         |                                                      |           |      |      |     |     |           |           |                   |
| B*40:156                                                | 40:156                  | HLA05856  |                                               | 0        | 0        | 2        | 0        | 0        | 0        | 0        | 2         |                                                      |           |      |      |     |     |           |           |                   |
| B*40:157                                                | 40:157                  | HLA05859  |                                               | 0        | 1        | 3        | 0        | 0        | 0        | 1        | 5         |                                                      |           |      |      |     |     |           | WD        | WD                |
| B*40:159                                                | 40:159                  | HLA06025  |                                               | 0        | 6        | 0        | 0        | 0        | 0        | 0        | 6         | WD                                                   |           |      |      |     |     |           | WD        | WD                |
| <b>B*40:160 total</b>                                   | <b>40:160 total</b>     |           |                                               | <b>0</b> | <b>5</b> | <b>8</b> | <b>0</b> | <b>0</b> | <b>0</b> | <b>0</b> | <b>13</b> | <b>WD</b>                                            | <b>WD</b> |      |      |     |     | <b>WD</b> | <b>WD</b> |                   |
| B*40:160                                                | 40:160                  |           |                                               | 0        | 1        | 1        | 0        | 0        | 0        | 0        | 2         |                                                      |           |      |      |     |     |           |           |                   |
| B*40:160:01                                             | 40:160:01               | HLA06228  |                                               | 0        | 4        | 1        | 0        | 0        | 0        | 0        | 5         |                                                      |           |      |      |     |     |           | WD        | WD                |
| B*40:160:02                                             | 40:160:02               | HLA08325  |                                               | 0        | 0        | 6        | 0        | 0        | 0        | 0        | 6         |                                                      |           | WD   |      |     |     |           | WD        | WD                |
| B*40:161                                                | 40:161                  | HLA06281  |                                               | 0        | 1        | 0        | 0        | 0        | 0        | 0        | 1         |                                                      |           |      |      |     |     |           |           |                   |

| Supplemental Table 9: HLA-B Allele Summary <sup>a</sup> |                |           | Allele Count by Population Group <sup>b</sup> |     |     |      |      |     |     |     |       | 3.0.0 CIWD Category by Population Group <sup>c</sup> |     |      |      |     |     |     |       |                   |
|---------------------------------------------------------|----------------|-----------|-----------------------------------------------|-----|-----|------|------|-----|-----|-----|-------|------------------------------------------------------|-----|------|------|-----|-----|-----|-------|-------------------|
| Allele                                                  | Genomic typing | Allele ID | G group                                       | AFA | API | EURO | MENA | HIS | NAM | UNK | Total | AFA                                                  | API | EURO | MENA | HIS | NAM | UNK | Total | Highest Frequency |
| B*40:165                                                | 40:165         | HLA06681  |                                               | 0   | 1   | 0    | 0    | 0   | 0   | 0   | 1     |                                                      |     |      |      |     |     |     |       |                   |
| B*40:168                                                | 40:168         | HLA06914  |                                               | 0   | 0   | 4    | 0    | 1   | 0   | 0   | 5     |                                                      |     |      |      |     |     |     | WD    | WD                |
| B*40:170                                                | 40:170         | HLA06939  |                                               | 0   | 0   | 2    | 0    | 0   | 0   | 0   | 2     |                                                      |     |      |      |     |     |     |       |                   |
| B*40:172                                                | 40:172         | HLA06982  |                                               | 0   | 0   | 3    | 0    | 0   | 0   | 1   | 4     |                                                      |     |      |      |     |     |     |       |                   |
| B*40:175                                                | 40:175         | HLA07285  |                                               | 0   | 0   | 1    | 0    | 1   | 0   | 2   | 4     |                                                      |     |      |      |     |     |     |       |                   |
| B*40:177                                                | 40:177         | HLA07304  |                                               | 0   | 3   | 1    | 1    | 0   | 0   | 1   | 6     |                                                      |     |      |      |     |     |     | WD    | WD                |
| B*40:181                                                | 40:181         | HLA07440  |                                               | 0   | 0   | 2    | 0    | 0   | 0   | 0   | 2     |                                                      |     |      |      |     |     |     |       |                   |
| B*40:183                                                | 40:183         | HLA07626  |                                               | 0   | 16  | 0    | 0    | 0   | 0   | 0   | 16    |                                                      | I   |      |      |     |     |     | WD    | I                 |
| B*40:187                                                | 40:187         | HLA07682  |                                               | 0   | 0   | 2    | 0    | 0   | 0   | 0   | 2     |                                                      |     |      |      |     |     |     |       |                   |
| B*40:190                                                | 40:190         | HLA07686  |                                               | 0   | 1   | 0    | 0    | 0   | 0   | 0   | 1     |                                                      |     |      |      |     |     |     |       |                   |
| B*40:195                                                | 40:195         | HLA07891  |                                               | 0   | 0   | 1    | 0    | 0   | 0   | 0   | 1     |                                                      |     |      |      |     |     |     |       |                   |
| B*40:196                                                | 40:196         | HLA07893  |                                               | 0   | 0   | 0    | 0    | 0   | 0   | 1   | 1     |                                                      |     |      |      |     |     |     |       |                   |
| B*40:197                                                | 40:197         | HLA07894  |                                               | 0   | 0   | 6    | 0    | 1   | 0   | 0   | 7     |                                                      |     | WD   |      |     |     |     | WD    | WD                |
| B*40:198                                                | 40:198         | HLA07895  |                                               | 0   | 0   | 3    | 0    | 0   | 0   | 0   | 3     |                                                      |     |      |      |     |     |     |       |                   |
| B*40:199                                                | 40:199         | HLA07896  |                                               | 0   | 1   | 0    | 0    | 0   | 0   | 0   | 1     |                                                      |     |      |      |     |     |     |       |                   |
| B*40:200                                                | 40:200         | HLA07897  |                                               | 0   | 0   | 8    | 0    | 0   | 0   | 0   | 8     |                                                      |     | WD   |      |     |     |     | WD    | WD                |
| B*40:201                                                | 40:201         | HLA07898  |                                               | 0   | 0   | 9    | 0    | 0   | 0   | 1   | 10    |                                                      |     | WD   |      |     |     |     | WD    | WD                |
| B*40:203                                                | 40:203         | HLA07900  |                                               | 0   | 0   | 6    | 0    | 0   | 0   | 0   | 6     |                                                      |     | WD   |      |     |     |     | WD    | WD                |
| B*40:207                                                | 40:207         | HLA07962  |                                               | 0   | 1   | 0    | 0    | 0   | 0   | 0   | 1     |                                                      |     |      |      |     |     |     |       |                   |
| B*40:217                                                | 40:217         | HLA08323  |                                               | 0   | 0   | 4    | 0    | 0   | 0   | 0   | 4     |                                                      |     |      |      |     |     |     |       |                   |
| B*40:219                                                | 40:219         | HLA08353  |                                               | 0   | 0   | 1    | 0    | 0   | 0   | 0   | 1     |                                                      |     |      |      |     |     |     |       |                   |
| B*40:224                                                | 40:224         | HLA08658  |                                               | 0   | 0   | 0    | 0    | 3   | 0   | 0   | 3     |                                                      |     |      |      |     |     |     |       |                   |
| B*40:225                                                | 40:225         | HLA08659  |                                               | 0   | 0   | 0    | 0    | 1   | 0   | 0   | 1     |                                                      |     |      |      |     |     |     |       |                   |
| B*40:226                                                | 40:226         | HLA08660  |                                               | 0   | 0   | 0    | 1    | 6   | 1   | 2   | 10    |                                                      |     |      |      | WD  |     |     | WD    | WD                |
| B*40:228                                                | 40:228         | HLA08884  |                                               | 0   | 1   | 0    | 0    | 0   | 0   | 0   | 1     |                                                      |     |      |      |     |     |     |       |                   |
| B*40:232                                                | 40:232         | HLA08978  |                                               | 0   | 0   | 1    | 0    | 0   | 0   | 0   | 1     |                                                      |     |      |      |     |     |     |       |                   |
| B*40:234                                                | 40:234         | HLA09423  |                                               | 0   | 0   | 1    | 0    | 0   | 0   | 1   | 2     |                                                      |     |      |      |     |     |     |       |                   |
| B*40:235                                                | 40:235         | HLA09425  |                                               | 0   | 1   | 0    | 0    | 0   | 0   | 0   | 1     |                                                      |     |      |      |     |     |     |       |                   |
| B*40:240                                                | 40:240         | HLA09555  |                                               | 0   | 0   | 1    | 0    | 0   | 0   | 0   | 1     |                                                      |     |      |      |     |     |     |       |                   |
| B*40:245                                                | 40:245         | HLA09702  |                                               | 0   | 1   | 0    | 0    | 0   | 0   | 0   | 1     |                                                      |     |      |      |     |     |     |       |                   |
| B*40:268                                                | 40:268         | HLA10729  |                                               | 0   | 1   | 0    | 0    | 0   | 0   | 0   | 1     |                                                      |     |      |      |     |     |     |       |                   |

| Supplemental Table 9: HLA-B Allele Summary <sup>a</sup> |                     |           | Allele Count by Population Group <sup>b</sup> |             |             |              |              |             |            |              |              | 3.0.0 CIWD Category by Population Group <sup>c</sup> |          |          |          |          |          |          |          |                   |          |
|---------------------------------------------------------|---------------------|-----------|-----------------------------------------------|-------------|-------------|--------------|--------------|-------------|------------|--------------|--------------|------------------------------------------------------|----------|----------|----------|----------|----------|----------|----------|-------------------|----------|
| Allele                                                  | Genomic typing      | Allele ID | G group                                       | AFA         | API         | EURO         | MENA         | HIS         | NAM        | UNK          | Total        | AFA                                                  | API      | EURO     | MENA     | HIS      | NAM      | UNK      | Total    | Highest Frequency |          |
| B*40:273                                                | 40:273              | HLA10997  |                                               | 0           | 0           | 1            | 0            | 0           | 0          | 0            | 1            |                                                      |          |          |          |          |          |          |          |                   |          |
| B*40:274                                                | 40:274              | HLA10998  |                                               | 0           | 0           | 0            | 0            | 2           | 0          | 0            | 2            |                                                      |          |          |          |          |          |          |          |                   |          |
| B*40:282                                                | 40:282              | HLA11418  |                                               | 0           | 1           | 0            | 0            | 0           | 0          | 0            | 1            |                                                      |          |          |          |          |          |          |          |                   |          |
| B*40:283                                                | 40:283              | HLA11455  |                                               | 0           | 0           | 0            | 0            | 2           | 0          | 0            | 2            |                                                      |          |          |          |          |          |          |          |                   |          |
| B*40:287                                                | 40:287              | HLA11721  |                                               | 0           | 3           | 0            | 0            | 0           | 0          | 0            | 3            |                                                      |          |          |          |          |          |          |          |                   |          |
| B*40:288                                                | 40:288              | HLA11813  |                                               | 0           | 0           | 1            | 0            | 0           | 0          | 0            | 1            |                                                      |          |          |          |          |          |          |          |                   |          |
| B*40:290                                                | 40:290              | HLA11815  |                                               | 0           | 0           | 1            | 0            | 0           | 0          | 2            | 3            |                                                      |          |          |          |          |          |          |          |                   |          |
| B*40:291N                                               | 40:291N             | HLA11816  |                                               | 0           | 2           | 0            | 0            | 0           | 0          | 0            | 2            |                                                      |          |          |          |          |          |          |          |                   |          |
| B*40:292                                                | 40:292              | HLA11817  |                                               | 0           | 0           | 0            | 0            | 0           | 0          | 1            | 1            |                                                      |          |          |          |          |          |          |          |                   |          |
| B*40:293                                                | 40:293              | HLA12000  |                                               | 0           | 0           | 1            | 0            | 0           | 0          | 0            | 1            |                                                      |          |          |          |          |          |          |          |                   |          |
| B*40:295                                                | 40:295              | HLA12128  |                                               | 0           | 39          | 0            | 1            | 0           | 0          | 0            | 40           |                                                      | I        |          |          |          |          |          | WD       | I                 |          |
| B*40:296                                                | 40:296              | HLA12264  |                                               | 0           | 0           | 1            | 0            | 2           | 0          | 0            | 3            |                                                      |          |          |          |          |          |          |          |                   |          |
| <b>B*40:298 total</b>                                   | <b>40:298 total</b> |           |                                               | <b>0</b>    | <b>0</b>    | <b>0</b>     | <b>0</b>     | <b>3</b>    | <b>0</b>   | <b>0</b>     | <b>3</b>     |                                                      |          |          |          |          |          |          |          |                   |          |
| B*40:298                                                | 40:298              |           |                                               | 0           | 0           | 0            | 0            | 3           | 0          | 0            | 3            |                                                      |          |          |          |          |          |          |          |                   |          |
| B*40:306                                                | 40:306              | HLA13384  |                                               | 0           | 1           | 0            | 0            | 0           | 0          | 0            | 1            |                                                      |          |          |          |          |          |          |          |                   |          |
| B*40:309                                                | 40:309              | HLA13740  |                                               | 0           | 0           | 0            | 0            | 1           | 0          | 0            | 1            |                                                      |          |          |          |          |          |          |          |                   |          |
| B*40:310                                                | 40:310              | HLA13850  |                                               | 0           | 6           | 0            | 0            | 0           | 0          | 0            | 6            |                                                      | WD       |          |          |          |          |          | WD       | WD                |          |
| B*40:311                                                | 40:311              | HLA13852  |                                               | 0           | 1           | 0            | 0            | 0           | 0          | 1            | 2            |                                                      |          |          |          |          |          |          |          |                   |          |
| B*40:313                                                | 40:313              | HLA13965  |                                               | 0           | 1           | 0            | 0            | 0           | 0          | 0            | 1            |                                                      |          |          |          |          |          |          |          |                   |          |
| B*40:318                                                | 40:318              | HLA14242  |                                               | 0           | 1           | 0            | 0            | 0           | 0          | 0            | 1            |                                                      |          |          |          |          |          |          |          |                   |          |
| B*40:321                                                | 40:321              | HLA14229  |                                               | 0           | 0           | 1            | 0            | 0           | 0          | 0            | 1            |                                                      |          |          |          |          |          |          |          |                   |          |
| B*40:322                                                | 40:322              | HLA14383  |                                               | 0           | 0           | 1            | 0            | 0           | 0          | 0            | 1            |                                                      |          |          |          |          |          |          |          |                   |          |
| B*40:331                                                | 40:331              | HLA14924  |                                               | 0           | 0           | 0            | 0            | 1           | 0          | 0            | 1            |                                                      |          |          |          |          |          |          |          |                   |          |
| B*40:334                                                | 40:334              | HLA14981  |                                               | 0           | 0           | 1            | 0            | 12          | 0          | 9            | 22           |                                                      |          |          |          | I        |          | WD       | WD       | I                 |          |
| B*40:340                                                | 40:340              | HLA15541  |                                               | 0           | 1           | 0            | 0            | 0           | 0          | 0            | 1            |                                                      |          |          |          |          |          |          |          |                   |          |
| B*40:347                                                | 40:347              | HLA16266  |                                               | 0           | 0           | 1            | 0            | 0           | 0          | 0            | 1            |                                                      |          |          |          |          |          |          |          |                   |          |
| B*40:348                                                | 40:348              | HLA16466  |                                               | 0           | 1           | 0            | 0            | 0           | 0          | 0            | 1            |                                                      |          |          |          |          |          |          |          |                   |          |
| B*40:CODE                                               | 40:CODE             |           |                                               | 351         | 4282        | 54471        | 578          | 3384        | 280        | 4555         | 67901        | NA                                                   | NA       | NA       | NA       | NA       | NA       | NA       | NA       | NA                | NA       |
| <b>B*41:01 total</b>                                    | <b>41:01 total</b>  |           |                                               | <b>1943</b> | <b>2807</b> | <b>58236</b> | <b>10552</b> | <b>6982</b> | <b>520</b> | <b>14336</b> | <b>95376</b> | <b>C</b>                                             | <b>C</b> | <b>C</b> | <b>C</b> | <b>C</b> | <b>C</b> | <b>C</b> | <b>C</b> | <b>C</b>          | <b>C</b> |
| B*41:01                                                 | 41:01               |           |                                               | 742         | 877         | 21934        | 2964         | 2712        | 260        | 5448         | 34937        | C                                                    | C        | C        | C        | C        | C        | C        | C        | C                 | C        |
| B*41:01P                                                | 41:01P              |           |                                               | 0           | 0           | 32           | 0            | 0           | 0          | 0            | 32           |                                                      |          | WD       |          |          |          |          | WD       | WD                |          |

| Supplemental Table 9: HLA-B Allele Summary <sup>a</sup> |                        |           | Allele Count by Population Group <sup>b</sup> |             |            |              |             |             |            |             |              | 3.0.0 CIWD Category by Population Group <sup>c</sup> |          |           |          |          |          |          |          |                   |          |
|---------------------------------------------------------|------------------------|-----------|-----------------------------------------------|-------------|------------|--------------|-------------|-------------|------------|-------------|--------------|------------------------------------------------------|----------|-----------|----------|----------|----------|----------|----------|-------------------|----------|
| Allele                                                  | Genomic typing         | Allele ID | G group                                       | AFA         | API        | EURO         | MENA        | HIS         | NAM        | UNK         | Total        | AFA                                                  | API      | EURO      | MENA     | HIS      | NAM      | UNK      | Total    | Highest Frequency |          |
| B*41:01:01                                              | 41:01:01               | HLA00312  |                                               | 1201        | 1929       | 36269        | 7582        | 4270        | 260        | 8888        | 60399        | C                                                    | C        | C         | C        | C        | C        | C        | C        | C                 | C        |
| B*41:01:02                                              | 41:01:02               | HLA11644  |                                               | 0           | 0          | 1            | 0           | 0           | 0          | 0           | 1            |                                                      |          |           |          |          |          |          |          |                   |          |
| B*41:01:03                                              | 41:01:03               | HLA12491  |                                               | 0           | 0          | 0            | 6           | 0           | 0          | 0           | 6            |                                                      |          |           | WD       |          |          |          | WD       | WD                |          |
| B*41:01:05                                              | 41:01:05               | HLA16928  |                                               | 0           | 1          | 0            | 0           | 0           | 0          | 0           | 1            |                                                      |          |           |          |          |          |          |          |                   |          |
| <b>B*41:02 total</b>                                    | <b>41:02 total</b>     |           |                                               | <b>2203</b> | <b>629</b> | <b>75559</b> | <b>2614</b> | <b>3308</b> | <b>332</b> | <b>8632</b> | <b>93277</b> | <b>C</b>                                             | <b>C</b> | <b>C</b>  | <b>C</b> | <b>C</b> | <b>C</b> | <b>C</b> | <b>C</b> | <b>C</b>          | <b>C</b> |
| B*41:02                                                 | 41:02                  |           |                                               | 150         | 32         | 3709         | 168         | 416         | 29         | 358         | 4862         | C                                                    | I        | C         | C        | C        | C        | C        | C        | C                 | C        |
| B*41:02P                                                | 41:02P                 |           |                                               | 0           | 0          | 14           | 0           | 0           | 0          | 0           | 14           |                                                      |          | WD        |          |          |          |          | WD       | WD                |          |
| <b>B*41:02:01G total</b>                                | <b>41:02:01G total</b> |           |                                               | <b>2052</b> | <b>597</b> | <b>71829</b> | <b>2446</b> | <b>2891</b> | <b>303</b> | <b>8270</b> | <b>88388</b> | <b>C</b>                                             | <b>C</b> | <b>C</b>  | <b>C</b> | <b>C</b> | <b>C</b> | <b>C</b> | <b>C</b> | <b>C</b>          | <b>C</b> |
| B*41:02:01G                                             | 41:02:01G              |           | 41:02:01G                                     | 247         | 201        | 25236        | 696         | 366         | 10         | 2623        | 29379        | C                                                    | C        | C         | C        | C        | C        | C        | C        | C                 | C        |
| B*41:02:01                                              | 41:02:01               | HLA00313  | 41:02:01G                                     | 1805        | 396        | 46593        | 1750        | 2525        | 293        | 5647        | 59009        | C                                                    | C        | C         | C        | C        | C        | C        | C        | C                 | C        |
| B*41:02:02                                              | 41:02:02               | HLA03965  |                                               | 0           | 0          | 1            | 0           | 0           | 0          | 0           | 1            |                                                      |          |           |          |          |          |          |          |                   |          |
| B*41:02:03                                              | 41:02:03               | HLA05515  |                                               | 0           | 0          | 1            | 0           | 0           | 0          | 1           | 2            |                                                      |          |           |          |          |          |          |          |                   |          |
| B*41:02:04                                              | 41:02:04               | HLA06697  |                                               | 0           | 0          | 1            | 0           | 0           | 0          | 0           | 1            |                                                      |          |           |          |          |          |          |          |                   |          |
| B*41:02:05                                              | 41:02:05               | HLA09424  |                                               | 1           | 0          | 4            | 0           | 0           | 0          | 2           | 7            |                                                      |          |           |          |          |          |          | WD       | WD                |          |
| B*41:02:06                                              | 41:02:06               | HLA12653  |                                               | 0           | 0          | 0            | 0           | 1           | 0          | 1           | 2            |                                                      |          |           |          |          |          |          |          |                   |          |
| <b>B*41:03 total</b>                                    | <b>41:03 total</b>     |           |                                               | <b>250</b>  | <b>0</b>   | <b>16</b>    | <b>1</b>    | <b>11</b>   | <b>4</b>   | <b>56</b>   | <b>338</b>   | <b>C</b>                                             |          | <b>WD</b> |          | <b>I</b> |          | <b>I</b> | <b>I</b> | <b>C</b>          |          |
| B*41:03                                                 | 41:03                  |           |                                               | 17          | 0          | 0            | 1           | 4           | 0          | 2           | 24           | WD                                                   |          |           |          |          |          |          | WD       | WD                |          |
| B*41:03:01                                              | 41:03:01               | HLA00314  |                                               | 233         | 0          | 12           | 0           | 7           | 4          | 54          | 310          | C                                                    |          | WD        |          | WD       |          | I        | I        | C                 |          |
| B*41:03:02                                              | 41:03:02               | HLA02922  |                                               | 0           | 0          | 4            | 0           | 0           | 0          | 0           | 4            |                                                      |          |           |          |          |          |          |          |                   |          |
| B*41:04                                                 | 41:04                  | HLA01256  |                                               | 3           | 0          | 0            | 0           | 0           | 0          | 0           | 3            |                                                      |          |           |          |          |          |          |          |                   |          |
| B*41:05                                                 | 41:05                  | HLA01288  |                                               | 0           | 0          | 14           | 0           | 0           | 0          | 1           | 15           |                                                      |          | WD        |          |          |          |          | WD       | WD                |          |
| B*41:06                                                 | 41:06                  | HLA01452  |                                               | 0           | 0          | 14           | 0           | 11          | 0          | 0           | 25           |                                                      |          | WD        |          | I        |          |          | WD       | I                 |          |
| B*41:07                                                 | 41:07                  | HLA02144  |                                               | 2           | 0          | 2            | 0           | 44          | 3          | 11          | 62           |                                                      |          |           |          | I        |          | WD       | WD       | I                 |          |
| B*41:09                                                 | 41:09                  | HLA03905  |                                               | 0           | 0          | 3            | 3           | 0           | 0          | 0           | 6            |                                                      |          |           |          |          |          |          | WD       | WD                |          |
| B*41:10                                                 | 41:10                  | HLA04094  |                                               | 0           | 0          | 8            | 0           | 0           | 0          | 0           | 8            |                                                      |          | WD        |          |          |          |          | WD       | WD                |          |
| B*41:11                                                 | 41:11                  | HLA04236  |                                               | 0           | 0          | 8            | 0           | 0           | 0          | 0           | 8            |                                                      |          | WD        |          |          |          |          | WD       | WD                |          |
| B*41:14                                                 | 41:14                  | HLA05538  |                                               | 0           | 0          | 3            | 1           | 0           | 0          | 1           | 5            |                                                      |          |           |          |          |          |          | WD       | WD                |          |
| B*41:15                                                 | 41:15                  | HLA05533  |                                               | 0           | 0          | 1            | 0           | 0           | 0          | 0           | 1            |                                                      |          |           |          |          |          |          |          |                   |          |
| B*41:16                                                 | 41:16                  | HLA05833  |                                               | 0           | 1          | 23           | 0           | 0           | 0          | 0           | 24           |                                                      |          | WD        |          |          |          |          | WD       | WD                |          |
| B*41:18                                                 | 41:18                  | HLA06252  |                                               | 0           | 0          | 7            | 0           | 0           | 0          | 0           | 7            |                                                      |          | WD        |          |          |          |          | WD       | WD                |          |
| B*41:19                                                 | 41:19                  | HLA06694  |                                               | 0           | 0          | 6            | 0           | 0           | 0          | 0           | 6            |                                                      |          | WD        |          |          |          |          | WD       | WD                |          |

| Supplemental Table 9: HLA-B Allele Summary <sup>a</sup> |                        |           | Allele Count by Population Group <sup>b</sup> |              |            |             |             |             |            |             |              | 3.0.0 CIWD Category by Population Group <sup>c</sup> |          |          |          |          |          |          |           |                   |
|---------------------------------------------------------|------------------------|-----------|-----------------------------------------------|--------------|------------|-------------|-------------|-------------|------------|-------------|--------------|------------------------------------------------------|----------|----------|----------|----------|----------|----------|-----------|-------------------|
| Allele                                                  | Genomic typing         | Allele ID | G group                                       | AFA          | API        | EURO        | MENA        | HIS         | NAM        | UNK         | Total        | AFA                                                  | API      | EURO     | MENA     | HIS      | NAM      | UNK      | Total     | Highest Frequency |
| B*41:21                                                 | 41:21                  | HLA08290  |                                               | 0            | 0          | 1           | 1           | 0           | 0          | 0           | 2            |                                                      |          |          |          |          |          |          |           |                   |
| B*41:22                                                 | 41:22                  | HLA08502  |                                               | 0            | 0          | 2           | 0           | 0           | 0          | 0           | 2            |                                                      |          |          |          |          |          |          |           |                   |
| B*41:23                                                 | 41:23                  | HLA08654  |                                               | 0            | 0          | 0           | 0           | 0           | 0          | 1           | 1            |                                                      |          |          |          |          |          |          |           |                   |
| B*41:27                                                 | 41:27                  | HLA09310  |                                               | 0            | 0          | 1           | 0           | 0           | 0          | 0           | 1            |                                                      |          |          |          |          |          |          |           |                   |
| B*41:28                                                 | 41:28                  | HLA09554  |                                               | 0            | 0          | 0           | 0           | 0           | 0          | 3           | 3            |                                                      |          |          |          |          |          |          |           |                   |
| B*41:30                                                 | 41:30                  | HLA10400  |                                               | 0            | 0          | 3           | 0           | 0           | 0          | 0           | 3            |                                                      |          |          |          |          |          |          |           |                   |
| B*41:31                                                 | 41:31                  | HLA10401  |                                               | 0            | 0          | 0           | 1           | 0           | 0          | 0           | 1            |                                                      |          |          |          |          |          |          |           |                   |
| B*41:32                                                 | 41:32                  | HLA10995  |                                               | 0            | 0          | 0           | 0           | 1           | 0          | 0           | 1            |                                                      |          |          |          |          |          |          |           |                   |
| B*41:40                                                 | 41:40                  | HLA13994  |                                               | 0            | 0          | 1           | 0           | 0           | 0          | 0           | 1            |                                                      |          |          |          |          |          |          |           |                   |
| B*41:44                                                 | 41:44                  | HLA14228  |                                               | 0            | 0          | 1           | 0           | 0           | 0          | 0           | 1            |                                                      |          |          |          |          |          |          |           |                   |
| B*41:51                                                 | 41:51                  | HLA16881  |                                               | 0            | 0          | 0           | 2           | 0           | 0          | 0           | 2            |                                                      |          |          |          |          |          |          |           |                   |
| B*41:CODE                                               | 41:CODE                |           |                                               | 44           | 13         | 4811        | 69          | 289         | 20         | 475         | 5721         | NA                                                   | NA       | NA       | NA       | NA       | NA       | NA       | NA        | NA                |
| <b>B*42:01 total</b>                                    | <b>42:01 total</b>     |           |                                               | <b>18521</b> | <b>136</b> | <b>2337</b> | <b>1179</b> | <b>3299</b> | <b>588</b> | <b>4986</b> | <b>31046</b> | <b>C</b>                                             | <b>C</b> | <b>C</b> | <b>C</b> | <b>C</b> | <b>C</b> | <b>C</b> | <b>C</b>  | <b>C</b>          |
| B*42:01                                                 | 42:01                  |           |                                               | 1227         | 6          | 163         | 47          | 369         | 51         | 263         | 2126         | C                                                    | WD       | I        | C        | C        | C        | C        | C         | C                 |
| B*42:01P                                                | 42:01P                 |           |                                               | 0            | 0          | 1           | 0           | 1           | 0          | 0           | 2            |                                                      |          |          |          |          |          |          |           |                   |
| <b>B*42:01:01G total</b>                                | <b>42:01:01G total</b> |           |                                               | <b>17294</b> | <b>130</b> | <b>2173</b> | <b>1132</b> | <b>2929</b> | <b>537</b> | <b>4723</b> | <b>28918</b> | <b>C</b>                                             | <b>C</b> | <b>C</b> | <b>C</b> | <b>C</b> | <b>C</b> | <b>C</b> | <b>C</b>  | <b>C</b>          |
| B*42:01:01                                              | 42:01:01               | HLA00315  | 42:01:01G                                     | 17294        | 130        | 2173        | 1132        | 2929        | 537        | 4723        | 28918        | C                                                    | C        | C        | C        | C        | C        | C        | C         | C                 |
| <b>B*42:02 total</b>                                    | <b>42:02 total</b>     |           |                                               | <b>2726</b>  | <b>49</b>  | <b>1553</b> | <b>287</b>  | <b>903</b>  | <b>103</b> | <b>942</b>  | <b>6563</b>  | <b>C</b>                                             | <b>I</b> | <b>C</b> | <b>C</b> | <b>C</b> | <b>C</b> | <b>C</b> | <b>C</b>  | <b>C</b>          |
| <b>B*42:02:01G total</b>                                | <b>42:02:01G total</b> |           |                                               | <b>2726</b>  | <b>49</b>  | <b>1553</b> | <b>287</b>  | <b>903</b>  | <b>103</b> | <b>942</b>  | <b>6563</b>  | <b>C</b>                                             | <b>I</b> | <b>C</b> | <b>C</b> | <b>C</b> | <b>C</b> | <b>C</b> | <b>C</b>  | <b>C</b>          |
| B*42:02                                                 | 42:02                  |           | 42:02:01G                                     | 1973         | 30         | 1018        | 244         | 585         | 73         | 624         | 4547         | C                                                    | I        | I        | C        | C        | C        | C        | C         | C                 |
| B*42:02P                                                | 42:02P                 |           |                                               | 0            | 0          | 2           | 0           | 0           | 0          | 0           | 2            |                                                      |          |          |          |          |          |          |           |                   |
| B*42:02:01G                                             | 42:02:01G              |           | 42:02:01G                                     | 333          | 17         | 447         | 33          | 107         | 4          | 186         | 1127         | C                                                    | I        | I        | WD       | C        |          | C        | I         | C                 |
| B*42:02:01                                              | 42:02:01               |           | 42:02:01G                                     | 12           | 0          | 1           | 5           | 10          | 1          | 19          | 48           | WD                                                   |          |          | WD       | I        |          | I        | WD        | I                 |
| B*42:02:01:01                                           | 42:02:01:01            | HLA00316  | 42:02:01G                                     | 1            | 0          | 0           | 0           | 0           | 0          | 0           | 1            |                                                      |          |          |          |          |          |          |           |                   |
| B*42:02:01:02                                           | 42:02:01:02            | HLA13483  | 42:02:01G                                     | 407          | 2          | 85          | 5           | 201         | 25         | 113         | 838          | C                                                    |          | WD       | WD       | C        | C        | I        | I         | C                 |
| <b>B*42:05 total</b>                                    | <b>42:05 total</b>     |           |                                               | <b>0</b>     | <b>0</b>   | <b>135</b>  | <b>1</b>    | <b>1</b>    | <b>0</b>   | <b>3</b>    | <b>140</b>   |                                                      |          | <b>I</b> |          |          |          |          | <b>WD</b> | <b>I</b>          |
| B*42:05                                                 | 42:05                  |           |                                               | 0            | 0          | 6           | 0           | 0           | 0          | 0           | 6            |                                                      |          | WD       |          |          |          |          | WD        | WD                |
| B*42:05:01                                              | 42:05:01               | HLA01712  |                                               | 0            | 0          | 129         | 1           | 1           | 0          | 3           | 134          |                                                      |          | I        |          |          |          |          | WD        | I                 |
| B*42:07                                                 | 42:07                  | HLA02311  |                                               | 0            | 0          | 4           | 17          | 0           | 0          | 0           | 21           |                                                      |          |          | WD       |          |          |          | WD        | WD                |
| B*42:08                                                 | 42:08                  | HLA02390  |                                               | 2            | 0          | 0           | 0           | 0           | 0          | 0           | 2            |                                                      |          |          |          |          |          |          |           |                   |
| B*42:09                                                 | 42:09                  | HLA02643  |                                               | 1            | 0          | 0           | 0           | 0           | 0          | 0           | 1            |                                                      |          |          |          |          |          |          |           |                   |

| Supplemental Table 9: HLA-B Allele Summary <sup>a</sup> |                        |           | Allele Count by Population Group <sup>b</sup> |             |             |               |              |              |             |              |                | 3.0.0 CIWD Category by Population Group <sup>c</sup> |          |          |          |          |          |          |          |                   |
|---------------------------------------------------------|------------------------|-----------|-----------------------------------------------|-------------|-------------|---------------|--------------|--------------|-------------|--------------|----------------|------------------------------------------------------|----------|----------|----------|----------|----------|----------|----------|-------------------|
| Allele                                                  | Genomic typing         | Allele ID | G group                                       | AFA         | API         | EURO          | MENA         | HIS          | NAM         | UNK          | Total          | AFA                                                  | API      | EURO     | MENA     | HIS      | NAM      | UNK      | Total    | Highest Frequency |
| B*42:10                                                 | 42:10                  | HLA03645  |                                               | 5           | 0           | 1             | 0            | 4            | 1           | 1            | 12             | WD                                                   |          |          |          |          |          |          | WD       | WD                |
| B*42:13                                                 | 42:13                  | HLA04168  |                                               | 2           | 0           | 1             | 0            | 0            | 0           | 1            | 4              |                                                      |          |          |          |          |          |          |          |                   |
| B*42:14                                                 | 42:14                  | HLA05308  |                                               | 1           | 0           | 0             | 0            | 0            | 0           | 0            | 1              |                                                      |          |          |          |          |          |          |          |                   |
| B*42:15                                                 | 42:15                  | HLA06223  |                                               | 1           | 0           | 0             | 0            | 0            | 0           | 0            | 1              |                                                      |          |          |          |          |          |          |          |                   |
| B*42:16                                                 | 42:16                  | HLA06286  |                                               | 0           | 0           | 0             | 1            | 0            | 0           | 0            | 1              |                                                      |          |          |          |          |          |          |          |                   |
| B*42:17                                                 | 42:17                  | HLA07959  |                                               | 0           | 0           | 0             | 0            | 0            | 0           | 2            | 2              |                                                      |          |          |          |          |          |          |          |                   |
| B*42:18                                                 | 42:18                  | HLA08981  |                                               | 0           | 0           | 6             | 0            | 8            | 0           | 7            | 21             |                                                      |          | WD       |          | I        |          | WD       | WD       | I                 |
| B*42:20                                                 | 42:20                  | HLA09313  |                                               | 0           | 0           | 0             | 0            | 1            | 0           | 0            | 1              |                                                      |          |          |          |          |          |          |          |                   |
| B*42:21                                                 | 42:21                  | HLA13541  |                                               | 0           | 0           | 0             | 0            | 0            | 0           | 1            | 1              |                                                      |          |          |          |          |          |          |          |                   |
| B*42:22                                                 | 42:22                  | HLA14236  |                                               | 1           | 0           | 0             | 0            | 0            | 0           | 0            | 1              |                                                      |          |          |          |          |          |          |          |                   |
| B*42:CODE                                               | 42:CODE                |           |                                               | 924         | 4           | 316           | 11           | 233          | 24          | 252          | 1764           | NA                                                   | NA       | NA       | NA       | NA       | NA       | NA       | NA       | NA                |
| <b>B*44:02 total</b>                                    | <b>44:02 total</b>     |           |                                               | <b>6023</b> | <b>8871</b> | <b>875511</b> | <b>16344</b> | <b>24376</b> | <b>2516</b> | <b>81297</b> | <b>1014938</b> | <b>C</b>                                             | <b>C</b> | <b>C</b> | <b>C</b> | <b>C</b> | <b>C</b> | <b>C</b> | <b>C</b> | <b>C</b>          |
| B*44:02                                                 | 44:02                  |           |                                               | 0           | 0           | 2522          | 7            | 18           | 0           | 151          | 2698           |                                                      |          | C        | WD       | I        |          | C        | C        | C                 |
| <b>B*44:02S total</b>                                   | <b>44:02S total</b>    |           |                                               | <b>0</b>    | <b>0</b>    | <b>2</b>      | <b>0</b>     | <b>1</b>     | <b>0</b>    | <b>1</b>     | <b>4</b>       |                                                      |          |          |          |          |          |          |          |                   |
| B*44:02P                                                | 44:02P                 |           |                                               | 0           | 3           | 663           | 3            | 3            | 0           | 1            | 673            |                                                      |          | I        |          |          |          |          | I        | I                 |
| <b>B*44:02:01G total</b>                                | <b>44:02:01G total</b> |           |                                               | <b>6022</b> | <b>8868</b> | <b>872020</b> | <b>16334</b> | <b>24335</b> | <b>2515</b> | <b>81105</b> | <b>1011199</b> | <b>C</b>                                             | <b>C</b> | <b>C</b> | <b>C</b> | <b>C</b> | <b>C</b> | <b>C</b> | <b>C</b> | <b>C</b>          |
| B*44:02:01G                                             | 44:02:01G              |           | 44:02:01G                                     | 4992        | 8174        | 829365        | 16004        | 18663        | 2024        | 75682        | 954904         | C                                                    | C        | C        | C        | C        | C        | C        | C        | C                 |
| B*44:02:01                                              | 44:02:01               |           | 44:02:01G                                     | 32          | 12          | 1638          | 6            | 146          | 7           | 208          | 2049           | WD                                                   | WD       | C        | WD       | C        | C        | C        | C        | C                 |
| B*44:02:01:01                                           | 44:02:01:01            | HLA00318  | 44:02:01G                                     | 884         | 648         | 36166         | 305          | 5095         | 457         | 4654         | 48209          | C                                                    | C        | C        | C        | C        | C        | C        | C        | C                 |
| B*44:02:01:02S                                          | 44:02:01:02S           | HLA01606  | 44:02:01G                                     | 0           | 0           | 2             | 0            | 1            | 0           | 1            | 4              |                                                      |          |          |          |          |          |          |          |                   |
| B*44:02:01:03                                           | 44:02:01:03            | HLA08401  | 44:02:01G                                     | 104         | 27          | 3763          | 14           | 319          | 23          | 442          | 4692           | C                                                    | I        | C        | WD       | C        | C        | C        | C        | C                 |
| B*44:02:01:04                                           | 44:02:01:04            | HLA15763  | 44:02:01G                                     | 2           | 0           | 17            | 0            | 1            | 0           | 2            | 22             |                                                      |          | WD       |          |          |          |          | WD       | WD                |
| B*44:02:01:05                                           | 44:02:01:05            | HLA15765  | 44:02:01G                                     | 0           | 0           | 5             | 0            | 0            | 0           | 1            | 6              |                                                      |          | WD       |          |          |          |          | WD       | WD                |
| B*44:02:01:06                                           | 44:02:01:06            | HLA16683  | 44:02:01G                                     | 0           | 0           | 1             | 0            | 0            | 0           | 0            | 1              |                                                      |          |          |          |          |          |          |          |                   |
| B*44:02:46                                              | 44:02:46               | HLA16859  | 44:02:01G                                     | 0           | 0           | 1             | 0            | 0            | 0           | 0            | 1              |                                                      |          |          |          |          |          |          |          |                   |
| B*44:27:01                                              | 44:27:01               | HLA01489  | 44:02:01G                                     | 8           | 7           | 1062          | 5            | 110          | 4           | 115          | 1311           | WD                                                   | WD       | I        | WD       | C        |          | I        | I        | C                 |
| B*44:02:02                                              | 44:02:02               | HLA01247  |                                               | 0           | 0           | 33            | 0            | 0            | 0           | 10           | 43             |                                                      |          | WD       |          |          |          | WD       | WD       | WD                |
| B*44:02:03                                              | 44:02:03               | HLA01487  |                                               | 0           | 0           | 1             | 0            | 0            | 0           | 0            | 1              |                                                      |          |          |          |          |          |          |          |                   |
| B*44:02:05                                              | 44:02:05               | HLA03412  |                                               | 0           | 0           | 3             | 0            | 0            | 0           | 2            | 5              |                                                      |          |          |          |          |          |          | WD       | WD                |
| B*44:02:06                                              | 44:02:06               | HLA03953  |                                               | 0           | 0           | 14            | 0            | 19           | 1           | 13           | 47             |                                                      |          | WD       |          | I        |          | WD       | WD       | I                 |
| B*44:02:07                                              | 44:02:07               | HLA03960  |                                               | 0           | 0           | 12            | 0            | 0            | 0           | 2            | 14             |                                                      |          | WD       |          |          |          |          | WD       | WD                |

| Supplemental Table 9: HLA-B Allele Summary <sup>a</sup> |                        |           | Allele Count by Population Group <sup>b</sup> |              |              |               |             |              |             |              |               | 3.0.0 CIWD Category by Population Group <sup>c</sup> |           |          |           |          |          |          |          |                   |
|---------------------------------------------------------|------------------------|-----------|-----------------------------------------------|--------------|--------------|---------------|-------------|--------------|-------------|--------------|---------------|------------------------------------------------------|-----------|----------|-----------|----------|----------|----------|----------|-------------------|
| Allele                                                  | Genomic typing         | Allele ID | G group                                       | AFA          | API          | EURO          | MENA        | HIS          | NAM         | UNK          | Total         | AFA                                                  | API       | EURO     | MENA      | HIS      | NAM      | UNK      | Total    | Highest Frequency |
| B*44:02:09                                              | 44:02:09               | HLA04116  |                                               | 0            | 0            | 10            | 0           | 0            | 0           | 0            | 10            |                                                      |           | WD       |           |          |          |          | WD       | WD                |
| B*44:02:10                                              | 44:02:10               | HLA04196  |                                               | 0            | 0            | 9             | 0           | 0            | 0           | 0            | 9             |                                                      |           | WD       |           |          |          |          | WD       | WD                |
| B*44:02:12                                              | 44:02:12               | HLA04568  |                                               | 1            | 0            | 9             | 0           | 1            | 0           | 3            | 14            |                                                      |           | WD       |           |          |          |          | WD       | WD                |
| B*44:02:15                                              | 44:02:15               | HLA06000  |                                               | 0            | 0            | 5             | 0           | 0            | 0           | 6            | 11            |                                                      |           | WD       |           |          |          | WD       | WD       | WD                |
| B*44:02:18                                              | 44:02:18               | HLA06646  |                                               | 0            | 0            | 6             | 0           | 0            | 0           | 0            | 6             |                                                      |           | WD       |           |          |          |          | WD       | WD                |
| B*44:02:19                                              | 44:02:19               | HLA06985  |                                               | 0            | 0            | 4             | 0           | 0            | 0           | 1            | 5             |                                                      |           |          |           |          |          |          | WD       | WD                |
| B*44:02:20                                              | 44:02:20               | HLA06998  |                                               | 0            | 0            | 1             | 0           | 0            | 0           | 0            | 1             |                                                      |           |          |           |          |          |          |          |                   |
| B*44:02:22                                              | 44:02:22               | HLA07450  |                                               | 0            | 0            | 6             | 0           | 0            | 0           | 0            | 6             |                                                      |           | WD       |           |          |          |          | WD       | WD                |
| B*44:02:24                                              | 44:02:24               | HLA07641  |                                               | 0            | 0            | 2             | 0           | 0            | 0           | 0            | 2             |                                                      |           |          |           |          |          |          |          |                   |
| B*44:02:33                                              | 44:02:33               | HLA12004  |                                               | 0            | 0            | 2             | 0           | 0            | 0           | 0            | 2             |                                                      |           |          |           |          |          |          |          |                   |
| B*44:02:34                                              | 44:02:34               | HLA12564  |                                               | 0            | 0            | 4             | 0           | 0            | 0           | 0            | 4             |                                                      |           |          |           |          |          |          |          |                   |
| <b>B*44:27 total</b>                                    | <b>44:27 total</b>     |           |                                               | <b>8</b>     | <b>7</b>     | <b>1241</b>   | <b>5</b>    | <b>110</b>   | <b>4</b>    | <b>118</b>   | <b>1493</b>   | <b>WD</b>                                            | <b>WD</b> | <b>C</b> | <b>WD</b> | <b>C</b> |          | <b>I</b> | <b>I</b> | <b>C</b>          |
| B*44:27                                                 | 44:27                  |           |                                               | 0            | 0            | 179           | 0           | 0            | 0           | 3            | 182           |                                                      |           | I        |           |          |          |          | I        | I                 |
| B*44:173                                                | 44:173                 | HLA09169  |                                               | 0            | 0            | 6             | 0           | 0            | 0           | 0            | 6             |                                                      |           | WD       |           |          |          |          | WD       | WD                |
| <b>B*44:03 total</b>                                    | <b>44:03 total</b>     |           |                                               | <b>18016</b> | <b>75358</b> | <b>487012</b> | <b>9241</b> | <b>38112</b> | <b>3896</b> | <b>58231</b> | <b>689866</b> | <b>C</b>                                             | <b>C</b>  | <b>C</b> | <b>C</b>  | <b>C</b> | <b>C</b> | <b>C</b> | <b>C</b> | <b>C</b>          |
| B*44:03                                                 | 44:03                  |           |                                               | 8661         | 4053         | 135235        | 2845        | 17919        | 2178        | 27996        | 198887        | C                                                    | C         | C        | C         | C        | C        | C        | C        | C                 |
| B*44:03P                                                | 44:03P                 |           |                                               | 0            | 2            | 92            | 0           | 0            | 0           | 0            | 94            |                                                      |           | WD       |           |          |          |          | WD       | WD                |
| <b>B*44:03:01G total</b>                                | <b>44:03:01G total</b> |           |                                               | <b>7462</b>  | <b>6425</b>  | <b>344824</b> | <b>4721</b> | <b>19081</b> | <b>1367</b> | <b>27559</b> | <b>411439</b> | <b>C</b>                                             | <b>C</b>  | <b>C</b> | <b>C</b>  | <b>C</b> | <b>C</b> | <b>C</b> | <b>C</b> | <b>C</b>          |
| B*44:03:01G                                             | 44:03:01G              |           | 44:03:01G                                     | 3954         | 4920         | 317468        | 4449        | 8415         | 327         | 21920        | 361453        | C                                                    | C         | C        | C         | C        | C        | C        | C        | C                 |
| B*44:03:01                                              | 44:03:01               |           | 44:03:01G                                     | 1933         | 814          | 12900         | 164         | 5977         | 550         | 3323         | 25661         | C                                                    | C         | C        | C         | C        | C        | C        | C        | C                 |
| B*44:03:01:01                                           | 44:03:01:01            | HLA00319  | 44:03:01G                                     | 1462         | 686          | 14199         | 92          | 4404         | 442         | 2222         | 23507         | C                                                    | C         | C        | C         | C        | C        | C        | C        | C                 |
| B*44:03:01:02                                           | 44:03:01:02            | HLA14090  | 44:03:01G                                     | 66           | 4            | 182           | 15          | 261          | 47          | 74           | 649           | C                                                    |           | I        | WD        | C        | C        | I        | I        | C                 |
| B*44:03:01:03                                           | 44:03:01:03            | HLA14807  | 44:03:01G                                     | 45           | 0            | 1             | 0           | 11           | 1           | 9            | 67            | C                                                    |           |          |           | I        |          | WD       | WD       | C                 |
| B*44:03:01:04                                           | 44:03:01:04            | HLA16269  | 44:03:01G                                     | 1            | 0            | 1             | 0           | 0            | 0           | 0            | 2             |                                                      |           |          |           |          |          |          |          |                   |
| B*44:03:01:09                                           | 44:03:01:09            | HLA16856  | 44:03:01G                                     | 0            | 1            | 27            | 1           | 11           | 0           | 8            | 48            |                                                      |           | WD       |           | I        |          | WD       | WD       | I                 |
| B*44:03:03                                              | 44:03:03               | HLA02825  | 44:03:01G                                     | 1            | 0            | 43            | 0           | 1            | 0           | 3            | 48            |                                                      |           | WD       |           |          |          |          | WD       | WD                |
| B*44:03:04                                              | 44:03:04               | HLA03840  | 44:03:01G                                     | 0            | 0            | 3             | 0           | 1            | 0           | 0            | 4             |                                                      |           |          |           |          |          |          |          |                   |
| <b>B*44:03:02G total</b>                                | <b>44:03:02G total</b> |           |                                               | <b>1881</b>  | <b>64866</b> | <b>6832</b>   | <b>1675</b> | <b>1112</b>  | <b>351</b>  | <b>2662</b>  | <b>79379</b>  | <b>C</b>                                             | <b>C</b>  | <b>C</b> | <b>C</b>  | <b>C</b> | <b>C</b> | <b>C</b> | <b>C</b> | <b>C</b>          |
| B*44:03:02G                                             | 44:03:02G              |           | 44:03:02G                                     | 337          | 41349        | 3313          | 824         | 159          | 21          | 848          | 46851         | C                                                    | C         | C        | C         | C        | C        | C        | C        | C                 |
| B*44:03:02                                              | 44:03:02               | HLA00320  | 44:03:02G                                     | 1544         | 23516        | 3519          | 851         | 953          | 330         | 1814         | 32527         | C                                                    | C         | C        | C         | C        | C        | C        | C        | C                 |
| B*44:03:27                                              | 44:03:27               | HLA13336  | 44:03:02G                                     | 0            | 1            | 0             | 0           | 0            | 0           | 0            | 1             |                                                      |           |          |           |          |          |          |          |                   |

| Supplemental Table 9: HLA-B Allele Summary <sup>a</sup> |                        |           | Allele Count by Population Group <sup>b</sup> |            |            |              |             |             |           |             |              | 3.0.0 CIWD Category by Population Group <sup>c</sup> |          |           |          |          |          |           |           |                   |          |
|---------------------------------------------------------|------------------------|-----------|-----------------------------------------------|------------|------------|--------------|-------------|-------------|-----------|-------------|--------------|------------------------------------------------------|----------|-----------|----------|----------|----------|-----------|-----------|-------------------|----------|
| Allele                                                  | Genomic typing         | Allele ID | G group                                       | AFA        | API        | EURO         | MENA        | HIS         | NAM       | UNK         | Total        | AFA                                                  | API      | EURO      | MENA     | HIS      | NAM      | UNK       | Total     | Highest Frequency |          |
| B*44:03:05                                              | 44:03:05               | HLA03907  |                                               | 0          | 0          | 1            | 0           | 0           | 0         | 0           | 1            |                                                      |          |           |          |          |          |           |           |                   |          |
| B*44:03:06                                              | 44:03:06               | HLA04103  |                                               | 0          | 0          | 2            | 0           | 0           | 0         | 0           | 2            |                                                      |          |           |          |          |          |           |           |                   |          |
| B*44:03:08                                              | 44:03:08               | HLA04252  |                                               | 8          | 0          | 0            | 0           | 0           | 0         | 4           | 12           | WD                                                   |          |           |          |          |          |           | WD        | WD                |          |
| B*44:03:09                                              | 44:03:09               | HLA04754  |                                               | 0          | 0          | 4            | 0           | 0           | 0         | 0           | 4            |                                                      |          |           |          |          |          |           |           |                   |          |
| B*44:03:10                                              | 44:03:10               | HLA04815  |                                               | 2          | 0          | 1            | 0           | 0           | 0         | 2           | 5            |                                                      |          |           |          |          |          |           | WD        | WD                |          |
| B*44:03:11                                              | 44:03:11               | HLA04847  |                                               | 0          | 0          | 7            | 0           | 0           | 0         | 1           | 8            |                                                      |          | WD        |          |          |          |           | WD        | WD                |          |
| B*44:03:13                                              | 44:03:13               | HLA06262  |                                               | 0          | 12         | 0            | 0           | 0           | 0         | 1           | 13           | WD                                                   |          |           |          |          |          |           | WD        | WD                |          |
| B*44:03:14                                              | 44:03:14               | HLA06645  |                                               | 0          | 0          | 2            | 0           | 0           | 0         | 0           | 2            |                                                      |          |           |          |          |          |           |           |                   |          |
| B*44:03:19                                              | 44:03:19               | HLA08471  |                                               | 0          | 0          | 6            | 0           | 0           | 0         | 3           | 9            |                                                      |          | WD        |          |          |          |           | WD        | WD                |          |
| B*44:03:22                                              | 44:03:22               | HLA11238  |                                               | 0          | 0          | 3            | 0           | 0           | 0         | 0           | 3            |                                                      |          |           |          |          |          |           |           |                   |          |
| B*44:03:23                                              | 44:03:23               | HLA11477  |                                               | 0          | 0          | 3            | 0           | 0           | 0         | 2           | 5            |                                                      |          |           |          |          |          |           | WD        | WD                |          |
| B*44:03:25                                              | 44:03:25               | HLA12990  |                                               | 0          | 0          | 0            | 0           | 0           | 0         | 1           | 1            |                                                      |          |           |          |          |          |           |           |                   |          |
| B*44:03:32                                              | 44:03:32               | HLA14227  |                                               | 1          | 0          | 0            | 0           | 0           | 0         | 0           | 1            |                                                      |          |           |          |          |          |           |           |                   |          |
| B*44:03:33                                              | 44:03:33               | HLA14397  |                                               | 1          | 0          | 0            | 0           | 0           | 0         | 0           | 1            |                                                      |          |           |          |          |          |           |           |                   |          |
| B*44:04                                                 | 44:04                  | HLA00321  |                                               | 45         | 12         | 6135         | 18          | 153         | 19        | 493         | 6875         | C                                                    | WD       | C         | WD       | C        | C        | C         | C         | C                 | C        |
| <b>B*44:05 total</b>                                    | <b>44:05 total</b>     |           |                                               | <b>159</b> | <b>159</b> | <b>59620</b> | <b>1191</b> | <b>1004</b> | <b>60</b> | <b>3728</b> | <b>65921</b> | <b>C</b>                                             | <b>C</b> | <b>C</b>  | <b>C</b> | <b>C</b> | <b>C</b> | <b>C</b>  | <b>C</b>  | <b>C</b>          | <b>C</b> |
| B*44:05                                                 | 44:05                  |           |                                               | 15         | 9          | 3684         | 99          | 108         | 4         | 187         | 4106         | WD                                                   | WD       | C         | C        | C        |          | C         | C         | C                 |          |
| B*44:05P                                                | 44:05P                 |           |                                               | 0          | 0          | 22           | 0           | 1           | 0         | 0           | 23           |                                                      |          | WD        |          |          |          |           | WD        | WD                |          |
| B*44:05:01                                              | 44:05:01               | HLA00322  |                                               | 144        | 150        | 55909        | 1092        | 894         | 56        | 3524        | 61769        | C                                                    | C        | C         | C        | C        | C        | C         | C         | C                 | C        |
| B*44:05:02                                              | 44:05:02               | HLA04563  |                                               | 0          | 0          | 1            | 0           | 0           | 0         | 0           | 1            |                                                      |          |           |          |          |          |           |           |                   |          |
| B*44:05:03                                              | 44:05:03               | HLA06944  |                                               | 0          | 0          | 4            | 0           | 1           | 0         | 17          | 22           |                                                      |          |           |          |          |          | I         | WD        | I                 |          |
| B*44:06                                                 | 44:06                  | HLA00323  |                                               | 2          | 100        | 777          | 35          | 45          | 4         | 47          | 1010         |                                                      | I        | I         | WD       | I        |          | I         | I         | I                 |          |
| B*44:07                                                 | 44:07                  | HLA00324  |                                               | 88         | 1          | 2            | 3           | 1           | 1         | 15          | 111          | C                                                    |          |           |          |          |          | I         | WD        | C                 |          |
| B*44:08                                                 | 44:08                  | HLA00325  |                                               | 6          | 1          | 195          | 0           | 5           | 1         | 22          | 230          | WD                                                   |          | I         |          | WD       |          | I         | I         | I                 |          |
| B*44:09                                                 | 44:09                  | HLA00326  |                                               | 3          | 1          | 223          | 1           | 3           | 1         | 31          | 263          |                                                      |          | I         |          |          |          | I         | I         | I                 |          |
| B*44:10                                                 | 44:10                  | HLA00327  |                                               | 492        | 0          | 22           | 0           | 71          | 9         | 117         | 711          | C                                                    |          | WD        |          | C        | C        | I         | I         | C                 |          |
| B*44:13                                                 | 44:13                  | HLA01066  |                                               | 0          | 0          | 15           | 0           | 2           | 0         | 6           | 23           |                                                      |          | WD        |          |          |          | WD        | WD        | WD                |          |
| <b>B*44:15 total</b>                                    | <b>44:15 total</b>     |           |                                               | <b>108</b> | <b>2</b>   | <b>10</b>    | <b>1</b>    | <b>1</b>    | <b>0</b>  | <b>11</b>   | <b>133</b>   | <b>C</b>                                             |          | <b>WD</b> |          |          |          | <b>WD</b> | <b>WD</b> | <b>C</b>          |          |
| <b>B*44:15:01G total</b>                                | <b>44:15:01G total</b> |           |                                               | <b>108</b> | <b>2</b>   | <b>10</b>    | <b>1</b>    | <b>1</b>    | <b>0</b>  | <b>11</b>   | <b>133</b>   | <b>C</b>                                             |          | <b>WD</b> |          |          |          | <b>WD</b> | <b>WD</b> | <b>C</b>          |          |
| B*44:15                                                 | 44:15                  |           | 44:15:01G                                     | 108        | 2          | 10           | 1           | 1           | 0         | 11          | 133          | C                                                    |          | WD        |          |          |          | WD        | WD        | C                 |          |
| B*44:17                                                 | 44:17                  | HLA01148  |                                               | 0          | 0          | 61           | 13          | 1           | 0         | 26          | 101          |                                                      |          | WD        | WD       |          |          | I         | WD        | I                 |          |



| Supplemental Table 9: HLA-B Allele Summary <sup>a</sup> |                    |           | Allele Count by Population Group <sup>b</sup> |          |          |           |          |          |          |          |           | 3.0.0 CIWD Category by Population Group <sup>c</sup> |           |           |      |     |     |     |           |                   |
|---------------------------------------------------------|--------------------|-----------|-----------------------------------------------|----------|----------|-----------|----------|----------|----------|----------|-----------|------------------------------------------------------|-----------|-----------|------|-----|-----|-----|-----------|-------------------|
| Allele                                                  | Genomic typing     | Allele ID | G group                                       | AFA      | API      | EURO      | MENA     | HIS      | NAM      | UNK      | Total     | AFA                                                  | API       | EURO      | MENA | HIS | NAM | UNK | Total     | Highest Frequency |
| B*44:18                                                 | 44:18              | HLA01144  |                                               | 23       | 0        | 2         | 0        | 0        | 0        | 3        | 28        | WD                                                   |           |           |      |     |     |     | WD        | WD                |
| B*44:20                                                 | 44:20              | HLA01195  |                                               | 1        | 0        | 30        | 0        | 1        | 0        | 6        | 38        |                                                      |           | WD        |      |     |     | WD  | WD        | WD                |
| B*44:21                                                 | 44:21              | HLA01197  |                                               | 0        | 0        | 131       | 8        | 6        | 0        | 10       | 155       |                                                      |           | I         | WD   | WD  |     | WD  | WD        | I                 |
| B*44:22                                                 | 44:22              | HLA01313  |                                               | 0        | 0        | 9         | 1        | 0        | 0        | 2        | 12        |                                                      |           | WD        |      |     |     |     | WD        | WD                |
| B*44:23N                                                | 44:23N             | HLA01341  |                                               | 0        | 0        | 42        | 0        | 4        | 1        | 4        | 51        |                                                      |           | WD        |      |     |     |     | WD        | WD                |
| B*44:24                                                 | 44:24              | HLA01354  |                                               | 0        | 0        | 9         | 0        | 0        | 0        | 1        | 10        |                                                      |           | WD        |      |     |     |     | WD        | WD                |
| B*44:25                                                 | 44:25              | HLA01427  |                                               | 0        | 0        | 57        | 0        | 1        | 0        | 1        | 59        |                                                      |           | WD        |      |     |     |     | WD        | WD                |
| <b>B*44:28 total</b>                                    | <b>44:28 total</b> |           |                                               | <b>2</b> | <b>0</b> | <b>9</b>  | <b>1</b> | <b>0</b> | <b>0</b> | <b>1</b> | <b>13</b> |                                                      |           | <b>WD</b> |      |     |     |     | <b>WD</b> | <b>WD</b>         |
| B*44:28                                                 | 44:28              |           |                                               | 0        | 0        | 1         | 0        | 0        | 0        | 0        | 1         |                                                      |           |           |      |     |     |     |           |                   |
| B*44:28:01                                              | 44:28:01           | HLA01521  |                                               | 2        | 0        | 0         | 0        | 0        | 0        | 0        | 2         |                                                      |           |           |      |     |     |     |           |                   |
| B*44:28:02                                              | 44:28:02           | HLA03203  |                                               | 0        | 0        | 8         | 1        | 0        | 0        | 1        | 10        |                                                      |           | WD        |      |     |     |     | WD        | WD                |
| B*44:29                                                 | 44:29              | HLA01526  |                                               | 3        | 7        | 1086      | 190      | 9        | 2        | 45       | 1342      | WD                                                   | I         | C         | I    |     |     | I   | I         | C                 |
| B*44:30                                                 | 44:30              | HLA01530  |                                               | 0        | 0        | 1         | 0        | 12       | 4        | 0        | 17        |                                                      |           |           |      | I   |     |     | WD        | I                 |
| B*44:31                                                 | 44:31              | HLA01569  |                                               | 0        | 0        | 0         | 13       | 0        | 0        | 0        | 13        |                                                      |           |           | WD   |     |     |     | WD        | WD                |
| B*44:32                                                 | 44:32              | HLA01617  |                                               | 0        | 0        | 28        | 0        | 0        | 0        | 1        | 29        |                                                      |           | WD        |      |     |     |     | WD        | WD                |
| <b>B*44:34 total</b>                                    | <b>44:34 total</b> |           |                                               | <b>0</b> | <b>0</b> | <b>23</b> | <b>0</b> | <b>0</b> | <b>0</b> | <b>4</b> | <b>27</b> |                                                      |           | <b>WD</b> |      |     |     |     | <b>WD</b> | <b>WD</b>         |
| B*44:34                                                 | 44:34              |           |                                               | 0        | 0        | 7         | 0        | 0        | 0        | 1        | 8         |                                                      |           | WD        |      |     |     |     | WD        | WD                |
| B*44:34:01                                              | 44:34:01           | HLA01700  |                                               | 0        | 0        | 14        | 0        | 0        | 0        | 3        | 17        |                                                      |           | WD        |      |     |     |     | WD        | WD                |
| B*44:34:02                                              | 44:34:02           | HLA08517  |                                               | 0        | 0        | 2         | 0        | 0        | 0        | 0        | 2         |                                                      |           |           |      |     |     |     |           |                   |
| B*44:36                                                 | 44:36              | HLA01784  |                                               | 0        | 0        | 20        | 0        | 0        | 0        | 6        | 26        |                                                      |           | WD        |      |     |     | WD  | WD        | WD                |
| <b>B*44:37 total</b>                                    | <b>44:37 total</b> |           |                                               | <b>0</b> | <b>9</b> | <b>8</b>  | <b>0</b> | <b>0</b> | <b>0</b> | <b>0</b> | <b>17</b> | <b>WD</b>                                            | <b>WD</b> |           |      |     |     |     | <b>WD</b> | <b>WD</b>         |
| B*44:37                                                 | 44:37              |           |                                               | 0        | 1        | 2         | 0        | 0        | 0        | 0        | 3         |                                                      |           |           |      |     |     |     |           |                   |
| B*44:37:01                                              | 44:37:01           | HLA01790  |                                               | 0        | 0        | 6         | 0        | 0        | 0        | 0        | 6         |                                                      |           | WD        |      |     |     |     | WD        | WD                |
| B*44:37:02                                              | 44:37:02           | HLA07699  |                                               | 0        | 8        | 0         | 0        | 0        | 0        | 0        | 8         | WD                                                   |           |           |      |     |     |     | WD        | WD                |
| <b>B*44:41 total</b>                                    | <b>44:41 total</b> |           |                                               | <b>0</b> | <b>0</b> | <b>30</b> | <b>1</b> | <b>0</b> | <b>0</b> | <b>0</b> | <b>31</b> |                                                      |           | <b>WD</b> |      |     |     |     | <b>WD</b> | <b>WD</b>         |
| B*44:41                                                 | 44:41              |           |                                               | 0        | 0        | 5         | 0        | 0        | 0        | 0        | 5         |                                                      |           | WD        |      |     |     |     | WD        | WD                |
| B*44:41:01                                              | 44:41:01           | HLA02098  |                                               | 0        | 0        | 25        | 1        | 0        | 0        | 0        | 26        |                                                      |           | WD        |      |     |     |     | WD        | WD                |
| B*44:42                                                 | 44:42              | HLA02206  |                                               | 0        | 0        | 1         | 0        | 0        | 0        | 0        | 1         |                                                      |           |           |      |     |     |     |           |                   |
| <b>B*44:43 total</b>                                    | <b>44:43 total</b> |           |                                               | <b>0</b> | <b>0</b> | <b>5</b>  | <b>0</b> | <b>1</b> | <b>0</b> | <b>1</b> | <b>7</b>  |                                                      |           | <b>WD</b> |      |     |     |     | <b>WD</b> | <b>WD</b>         |
| B*44:43:01                                              | 44:43:01           | HLA02234  |                                               | 0        | 0        | 5         | 0        | 1        | 0        | 1        | 7         |                                                      |           | WD        |      |     |     |     | WD        | WD                |
| B*44:45                                                 | 44:45              | HLA02316  |                                               | 0        | 0        | 10        | 0        | 0        | 0        | 0        | 10        |                                                      |           | WD        |      |     |     |     | WD        | WD                |

| Supplemental Table 9: HLA-B Allele Summary <sup>a</sup> |                    |           | Allele Count by Population Group <sup>b</sup> |          |          |           |          |          |          |          |           | 3.0.0 CIWD Category by Population Group <sup>c</sup> |     |           |      |     |     |     |           |                   |
|---------------------------------------------------------|--------------------|-----------|-----------------------------------------------|----------|----------|-----------|----------|----------|----------|----------|-----------|------------------------------------------------------|-----|-----------|------|-----|-----|-----|-----------|-------------------|
| Allele                                                  | Genomic typing     | Allele ID | G group                                       | AFA      | API      | EURO      | MENA     | HIS      | NAM      | UNK      | Total     | AFA                                                  | API | EURO      | MENA | HIS | NAM | UNK | Total     | Highest Frequency |
| B*44:46                                                 | 44:46              | HLA02343  |                                               | 0        | 0        | 1         | 0        | 1        | 0        | 0        | 2         |                                                      |     |           |      |     |     |     |           |                   |
| B*44:47                                                 | 44:47              | HLA02464  |                                               | 0        | 1        | 0         | 0        | 0        | 0        | 0        | 1         |                                                      |     |           |      |     |     |     |           |                   |
| B*44:48                                                 | 44:48              | HLA02644  |                                               | 0        | 0        | 35        | 0        | 0        | 0        | 2        | 37        |                                                      |     | WD        |      |     |     |     | WD        | WD                |
| <b>B*44:50 total</b>                                    | <b>44:50 total</b> |           |                                               | <b>3</b> | <b>0</b> | <b>2</b>  | <b>0</b> | <b>4</b> | <b>0</b> | <b>2</b> | <b>11</b> |                                                      |     |           |      |     |     |     | <b>WD</b> | <b>WD</b>         |
| B*44:50                                                 | 44:50              |           |                                               | 2        | 0        | 1         | 0        | 1        | 0        | 2        | 6         |                                                      |     |           |      |     |     |     | WD        | WD                |
| B*44:50:01                                              | 44:50:01           | HLA02695  |                                               | 1        | 0        | 1         | 0        | 3        | 0        | 0        | 5         |                                                      |     |           |      |     |     |     | WD        | WD                |
| B*44:51                                                 | 44:51              | HLA02700  |                                               | 0        | 0        | 4         | 0        | 0        | 0        | 0        | 4         |                                                      |     |           |      |     |     |     |           |                   |
| <b>B*44:53 total</b>                                    | <b>44:53 total</b> |           |                                               | <b>0</b> | <b>0</b> | <b>1</b>  | <b>0</b> | <b>1</b> | <b>0</b> | <b>0</b> | <b>2</b>  |                                                      |     |           |      |     |     |     |           |                   |
| B*44:53                                                 | 44:53              |           |                                               | 0        | 0        | 1         | 0        | 1        | 0        | 0        | 2         |                                                      |     |           |      |     |     |     |           |                   |
| B*44:55                                                 | 44:55              | HLA03001  |                                               | 0        | 0        | 2         | 0        | 0        | 0        | 0        | 2         |                                                      |     |           |      |     |     |     |           |                   |
| B*44:57                                                 | 44:57              | HLA03133  |                                               | 0        | 0        | 3         | 0        | 0        | 0        | 0        | 3         |                                                      |     |           |      |     |     |     |           |                   |
| <b>B*44:59 total</b>                                    | <b>44:59 total</b> |           |                                               | <b>0</b> | <b>0</b> | <b>2</b>  | <b>0</b> | <b>1</b> | <b>0</b> | <b>0</b> | <b>3</b>  |                                                      |     |           |      |     |     |     |           |                   |
| B*44:59                                                 | 44:59              |           |                                               | 0        | 0        | 1         | 0        | 0        | 0        | 0        | 1         |                                                      |     |           |      |     |     |     |           |                   |
| B*44:59:01                                              | 44:59:01           | HLA03190  |                                               | 0        | 0        | 1         | 0        | 1        | 0        | 0        | 2         |                                                      |     |           |      |     |     |     |           |                   |
| B*44:60                                                 | 44:60              | HLA03259  |                                               | 0        | 0        | 4         | 2        | 0        | 0        | 2        | 8         |                                                      |     |           |      |     |     |     | WD        | WD                |
| B*44:62                                                 | 44:62              | HLA03358  |                                               | 0        | 0        | 2         | 0        | 0        | 0        | 0        | 2         |                                                      |     |           |      |     |     |     |           |                   |
| B*44:63                                                 | 44:63              | HLA03359  |                                               | 0        | 0        | 0         | 0        | 0        | 0        | 1        | 1         |                                                      |     |           |      |     |     |     |           |                   |
| <b>B*44:64 total</b>                                    | <b>44:64 total</b> |           |                                               | <b>0</b> | <b>0</b> | <b>23</b> | <b>0</b> | <b>2</b> | <b>0</b> | <b>0</b> | <b>25</b> |                                                      |     | <b>WD</b> |      |     |     |     | <b>WD</b> | <b>WD</b>         |
| B*44:64                                                 | 44:64              |           |                                               | 0        | 0        | 1         | 0        | 0        | 0        | 0        | 1         |                                                      |     |           |      |     |     |     |           |                   |
| B*44:64:02                                              | 44:64:02           | HLA03393  |                                               | 0        | 0        | 22        | 0        | 2        | 0        | 0        | 24        |                                                      |     | WD        |      |     |     |     | WD        | WD                |
| B*44:65                                                 | 44:65              | HLA03536  |                                               | 0        | 1        | 2         | 0        | 0        | 0        | 1        | 4         |                                                      |     |           |      |     |     |     |           |                   |
| B*44:67                                                 | 44:67              | HLA03627  |                                               | 0        | 0        | 8         | 0        | 0        | 0        | 0        | 8         |                                                      |     | WD        |      |     |     |     | WD        | WD                |
| B*44:68                                                 | 44:68              | HLA03718  |                                               | 0        | 0        | 8         | 0        | 0        | 0        | 0        | 8         |                                                      |     | WD        |      |     |     |     | WD        | WD                |
| <b>B*44:69 total</b>                                    | <b>44:69 total</b> |           |                                               | <b>0</b> | <b>1</b> | <b>1</b>  | <b>0</b> | <b>0</b> | <b>0</b> | <b>0</b> | <b>2</b>  |                                                      |     |           |      |     |     |     |           |                   |
| B*44:69:01                                              | 44:69:01           | HLA03695  |                                               | 0        | 0        | 1         | 0        | 0        | 0        | 0        | 1         |                                                      |     |           |      |     |     |     |           |                   |
| B*44:69:02                                              | 44:69:02           | HLA15272  |                                               | 0        | 1        | 0         | 0        | 0        | 0        | 0        | 1         |                                                      |     |           |      |     |     |     |           |                   |
| B*44:70                                                 | 44:70              | HLA03903  |                                               | 0        | 0        | 3         | 0        | 0        | 0        | 0        | 3         |                                                      |     |           |      |     |     |     |           |                   |
| B*44:71                                                 | 44:71              | HLA03950  |                                               | 0        | 0        | 2         | 0        | 0        | 0        | 0        | 2         |                                                      |     |           |      |     |     |     |           |                   |
| B*44:72                                                 | 44:72              | HLA03962  |                                               | 0        | 1        | 1         | 0        | 0        | 0        | 0        | 2         |                                                      |     |           |      |     |     |     |           |                   |
| B*44:73                                                 | 44:73              | HLA03973  |                                               | 0        | 0        | 11        | 0        | 0        | 0        | 0        | 11        |                                                      |     | WD        |      |     |     |     | WD        | WD                |
| B*44:74                                                 | 44:74              | HLA03974  |                                               | 0        | 0        | 28        | 0        | 0        | 0        | 0        | 28        |                                                      |     | WD        |      |     |     |     | WD        | WD                |

| Supplemental Table 9: HLA-B Allele Summary <sup>a</sup> |                    |           | Allele Count by Population Group <sup>b</sup> |          |          |          |          |          |          |          |          | 3.0.0 CIWD Category by Population Group <sup>c</sup> |     |      |      |     |     |     |           |                   |
|---------------------------------------------------------|--------------------|-----------|-----------------------------------------------|----------|----------|----------|----------|----------|----------|----------|----------|------------------------------------------------------|-----|------|------|-----|-----|-----|-----------|-------------------|
| Allele                                                  | Genomic typing     | Allele ID | G group                                       | AFA      | API      | EURO     | MENA     | HIS      | NAM      | UNK      | Total    | AFA                                                  | API | EURO | MENA | HIS | NAM | UNK | Total     | Highest Frequency |
| B*44:75                                                 | 44:75              | HLA04044  |                                               | 0        | 0        | 1        | 0        | 0        | 0        | 0        | 1        |                                                      |     |      |      |     |     |     |           |                   |
| B*44:76                                                 | 44:76              | HLA04056  |                                               | 0        | 0        | 21       | 0        | 1        | 0        | 1        | 23       |                                                      |     | WD   |      |     |     |     | WD        | WD                |
| B*44:77                                                 | 44:77              | HLA04082  |                                               | 0        | 0        | 11       | 0        | 0        | 0        | 0        | 11       |                                                      |     | WD   |      |     |     |     | WD        | WD                |
| B*44:78                                                 | 44:78              | HLA04085  |                                               | 0        | 0        | 1        | 0        | 0        | 0        | 0        | 1        |                                                      |     |      |      |     |     |     |           |                   |
| <b>B*44:79 total</b>                                    | <b>44:79 total</b> |           |                                               | <b>0</b> | <b>0</b> | <b>4</b> | <b>0</b> | <b>0</b> | <b>0</b> | <b>0</b> | <b>4</b> |                                                      |     |      |      |     |     |     |           |                   |
| B*44:79                                                 | 44:79              |           |                                               | 0        | 0        | 1        | 0        | 0        | 0        | 0        | 1        |                                                      |     |      |      |     |     |     |           |                   |
| B*44:79:01                                              | 44:79:01           | HLA04086  |                                               | 0        | 0        | 3        | 0        | 0        | 0        | 0        | 3        |                                                      |     |      |      |     |     |     |           |                   |
| B*44:80                                                 | 44:80              | HLA04096  |                                               | 0        | 0        | 15       | 0        | 0        | 0        | 0        | 15       |                                                      |     | WD   |      |     |     |     | WD        | WD                |
| B*44:83                                                 | 44:83              | HLA04111  |                                               | 0        | 0        | 4        | 4        | 0        | 0        | 1        | 9        |                                                      |     |      |      |     |     |     | WD        | WD                |
| <b>B*44:84 total</b>                                    | <b>44:84 total</b> |           |                                               | <b>1</b> | <b>0</b> | <b>3</b> | <b>1</b> | <b>0</b> | <b>0</b> | <b>0</b> | <b>5</b> |                                                      |     |      |      |     |     |     | <b>WD</b> | <b>WD</b>         |
| B*44:84:01                                              | 44:84:01           | HLA04173  |                                               | 0        | 0        | 0        | 1        | 0        | 0        | 0        | 1        |                                                      |     |      |      |     |     |     |           |                   |
| B*44:84:02                                              | 44:84:02           | HLA10150  |                                               | 1        | 0        | 3        | 0        | 0        | 0        | 0        | 4        |                                                      |     |      |      |     |     |     |           |                   |
| B*44:85                                                 | 44:85              | HLA04194  |                                               | 1        | 0        | 1        | 0        | 1        | 0        | 0        | 3        |                                                      |     |      |      |     |     |     |           |                   |
| B*44:86                                                 | 44:86              | HLA04215  |                                               | 0        | 0        | 41       | 0        | 0        | 0        | 0        | 41       |                                                      |     | WD   |      |     |     |     | WD        | WD                |
| B*44:87                                                 | 44:87              | HLA04224  |                                               | 0        | 14       | 0        | 0        | 0        | 0        | 0        | 14       |                                                      | I   |      |      |     |     |     | WD        | I                 |
| B*44:88                                                 | 44:88              | HLA04228  |                                               | 0        | 0        | 7        | 0        | 0        | 0        | 0        | 7        |                                                      |     | WD   |      |     |     |     | WD        | WD                |
| B*44:89                                                 | 44:89              | HLA04455  |                                               | 0        | 0        | 4        | 0        | 0        | 0        | 0        | 4        |                                                      |     |      |      |     |     |     |           |                   |
| B*44:91                                                 | 44:91              | HLA04501  |                                               | 0        | 0        | 10       | 0        | 0        | 0        | 1        | 11       |                                                      |     | WD   |      |     |     |     | WD        | WD                |
| B*44:92                                                 | 44:92              | HLA04514  |                                               | 0        | 0        | 6        | 0        | 0        | 0        | 0        | 6        |                                                      |     | WD   |      |     |     |     | WD        | WD                |
| B*44:95                                                 | 44:95              | HLA04536  |                                               | 0        | 0        | 4        | 0        | 0        | 0        | 0        | 4        |                                                      |     |      |      |     |     |     |           |                   |
| B*44:96                                                 | 44:96              | HLA04540  |                                               | 0        | 0        | 8        | 0        | 0        | 0        | 0        | 8        |                                                      |     | WD   |      |     |     |     | WD        | WD                |
| B*44:98                                                 | 44:98              | HLA04542  |                                               | 0        | 0        | 3        | 0        | 1        | 0        | 9        | 13       |                                                      |     |      |      |     |     |     | WD        | WD                |
| B*44:99                                                 | 44:99              | HLA04556  |                                               | 0        | 0        | 4        | 0        | 1        | 0        | 3        | 8        |                                                      |     |      |      |     |     |     | WD        | WD                |
| B*44:103                                                | 44:103             | HLA05049  |                                               | 0        | 0        | 0        | 1        | 1        | 0        | 0        | 2        |                                                      |     |      |      |     |     |     |           |                   |
| B*44:104                                                | 44:104             | HLA05052  |                                               | 0        | 0        | 5        | 0        | 0        | 0        | 0        | 5        |                                                      |     | WD   |      |     |     |     | WD        | WD                |
| B*44:105                                                | 44:105             | HLA05055  |                                               | 0        | 0        | 2        | 0        | 0        | 0        | 1        | 3        |                                                      |     |      |      |     |     |     |           |                   |
| B*44:107                                                | 44:107             | HLA05062  |                                               | 0        | 0        | 5        | 0        | 0        | 0        | 0        | 5        |                                                      |     | WD   |      |     |     |     | WD        | WD                |
| B*44:109                                                | 44:109             | HLA05099  |                                               | 0        | 0        | 1        | 0        | 0        | 0        | 0        | 1        |                                                      |     |      |      |     |     |     |           |                   |
| B*44:110                                                | 44:110             | HLA05406  |                                               | 0        | 0        | 3        | 0        | 0        | 0        | 0        | 3        |                                                      |     |      |      |     |     |     |           |                   |
| B*44:111                                                | 44:111             | HLA05534  |                                               | 0        | 0        | 7        | 0        | 0        | 0        | 0        | 7        |                                                      |     | WD   |      |     |     |     | WD        | WD                |
| B*44:112                                                | 44:112             | HLA05717  |                                               | 0        | 1        | 0        | 0        | 0        | 0        | 0        | 1        |                                                      |     |      |      |     |     |     |           |                   |

| Supplemental Table 9: HLA-B Allele Summary <sup>a</sup> |                     |           | Allele Count by Population Group <sup>b</sup> |          |          |          |          |          |          |          |          | 3.0.0 CIWD Category by Population Group <sup>c</sup> |     |      |      |     |     |     |       |                   |
|---------------------------------------------------------|---------------------|-----------|-----------------------------------------------|----------|----------|----------|----------|----------|----------|----------|----------|------------------------------------------------------|-----|------|------|-----|-----|-----|-------|-------------------|
| Allele                                                  | Genomic typing      | Allele ID | G group                                       | AFA      | API      | EURO     | MENA     | HIS      | NAM      | UNK      | Total    | AFA                                                  | API | EURO | MENA | HIS | NAM | UNK | Total | Highest Frequency |
| B*44:113                                                | 44:113              | HLA05829  |                                               | 0        | 0        | 1        | 0        | 0        | 0        | 0        | 1        |                                                      |     |      |      |     |     |     |       |                   |
| B*44:115                                                | 44:115              | HLA05877  |                                               | 0        | 0        | 10       | 0        | 0        | 0        | 2        | 12       |                                                      |     | WD   |      |     |     |     | WD    | WD                |
| B*44:116                                                | 44:116              | HLA05926  |                                               | 0        | 0        | 6        | 0        | 0        | 0        | 0        | 6        |                                                      |     | WD   |      |     |     |     | WD    | WD                |
| B*44:117                                                | 44:117              | HLA06045  |                                               | 0        | 0        | 0        | 0        | 0        | 0        | 1        | 1        |                                                      |     |      |      |     |     |     |       |                   |
| B*44:120                                                | 44:120              | HLA06218  |                                               | 0        | 0        | 7        | 0        | 0        | 0        | 0        | 7        |                                                      |     | WD   |      |     |     |     | WD    | WD                |
| B*44:122                                                | 44:122              | HLA06244  |                                               | 0        | 0        | 8        | 0        | 1        | 0        | 0        | 9        |                                                      |     | WD   |      |     |     |     | WD    | WD                |
| B*44:124                                                | 44:124              | HLA06246  |                                               | 0        | 3        | 0        | 0        | 0        | 0        | 0        | 3        |                                                      |     |      |      |     |     |     |       |                   |
| B*44:125                                                | 44:125              | HLA06247  |                                               | 0        | 0        | 1        | 0        | 0        | 0        | 0        | 1        |                                                      |     |      |      |     |     |     |       |                   |
| <b>B*44:126 total</b>                                   | <b>44:126 total</b> |           |                                               | <b>0</b> | <b>0</b> | <b>1</b> | <b>0</b> | <b>0</b> | <b>0</b> | <b>0</b> | <b>1</b> |                                                      |     |      |      |     |     |     |       |                   |
| B*44:126                                                | 44:126              |           |                                               | 0        | 0        | 1        | 0        | 0        | 0        | 0        | 1        |                                                      |     |      |      |     |     |     |       |                   |
| B*44:130                                                | 44:130              | HLA06642  |                                               | 0        | 0        | 0        | 0        | 0        | 0        | 1        | 1        |                                                      |     |      |      |     |     |     |       |                   |
| B*44:132                                                | 44:132              | HLA06976  |                                               | 0        | 0        | 2        | 0        | 0        | 0        | 0        | 2        |                                                      |     |      |      |     |     |     |       |                   |
| B*44:135                                                | 44:135              | HLA07090  |                                               | 0        | 0        | 2        | 0        | 0        | 0        | 0        | 2        |                                                      |     |      |      |     |     |     |       |                   |
| B*44:137                                                | 44:137              | HLA07194  |                                               | 0        | 1        | 2        | 0        | 0        | 0        | 0        | 3        |                                                      |     |      |      |     |     |     |       |                   |
| B*44:138Q                                               | 44:138Q             | HLA07343  |                                               | 0        | 0        | 1        | 0        | 0        | 0        | 1        | 2        |                                                      |     |      |      |     |     |     |       |                   |
| B*44:140                                                | 44:140              | HLA07447  |                                               | 0        | 0        | 1        | 0        | 0        | 0        | 0        | 1        |                                                      |     |      |      |     |     |     |       |                   |
| B*44:143                                                | 44:143              | HLA07451  |                                               | 0        | 2        | 0        | 0        | 0        | 0        | 0        | 2        |                                                      |     |      |      |     |     |     |       |                   |
| B*44:145                                                | 44:145              | HLA07642  |                                               | 0        | 0        | 1        | 0        | 0        | 0        | 0        | 1        |                                                      |     |      |      |     |     |     |       |                   |
| B*44:146                                                | 44:146              | HLA07696  |                                               | 0        | 0        | 9        | 0        | 0        | 0        | 0        | 9        |                                                      |     | WD   |      |     |     |     | WD    | WD                |
| B*44:147                                                | 44:147              | HLA07697  |                                               | 0        | 0        | 1        | 0        | 0        | 0        | 0        | 1        |                                                      |     |      |      |     |     |     |       |                   |
| B*44:148                                                | 44:148              | HLA07698  |                                               | 1        | 0        | 1        | 0        | 0        | 0        | 0        | 2        |                                                      |     |      |      |     |     |     |       |                   |
| B*44:152                                                | 44:152              | HLA07812  |                                               | 0        | 0        | 4        | 0        | 0        | 0        | 0        | 4        |                                                      |     |      |      |     |     |     |       |                   |
| B*44:153                                                | 44:153              | HLA08060  |                                               | 0        | 1        | 0        | 0        | 0        | 0        | 0        | 1        |                                                      |     |      |      |     |     |     |       |                   |
| B*44:155                                                | 44:155              | HLA08131  |                                               | 0        | 0        | 1        | 0        | 0        | 0        | 0        | 1        |                                                      |     |      |      |     |     |     |       |                   |
| B*44:158                                                | 44:158              | HLA08349  |                                               | 0        | 0        | 1        | 0        | 0        | 0        | 0        | 1        |                                                      |     |      |      |     |     |     |       |                   |
| B*44:163                                                | 44:163              | HLA08674  |                                               | 0        | 0        | 0        | 0        | 0        | 0        | 2        | 2        |                                                      |     |      |      |     |     |     |       |                   |
| B*44:165                                                | 44:165              | HLA08687  |                                               | 0        | 0        | 0        | 0        | 0        | 0        | 2        | 2        |                                                      |     |      |      |     |     |     |       |                   |
| B*44:166                                                | 44:166              | HLA08809  |                                               | 0        | 0        | 6        | 0        | 0        | 0        | 0        | 6        |                                                      |     | WD   |      |     |     |     | WD    | WD                |
| B*44:169                                                | 44:169              | HLA08985  |                                               | 0        | 0        | 3        | 0        | 0        | 0        | 0        | 3        |                                                      |     |      |      |     |     |     |       |                   |
| B*44:170                                                | 44:170              | HLA08986  |                                               | 0        | 0        | 1        | 0        | 0        | 0        | 0        | 1        |                                                      |     |      |      |     |     |     |       |                   |
| B*44:177                                                | 44:177              | HLA09594  |                                               | 0        | 0        | 3        | 0        | 0        | 0        | 1        | 4        |                                                      |     |      |      |     |     |     |       |                   |

| Supplemental Table 9: HLA-B Allele Summary <sup>a</sup> |                     |           | Allele Count by Population Group <sup>b</sup> |          |          |          |          |          |          |          |          | 3.0.0 CIWD Category by Population Group <sup>c</sup> |     |           |      |     |     |     |           |                   |
|---------------------------------------------------------|---------------------|-----------|-----------------------------------------------|----------|----------|----------|----------|----------|----------|----------|----------|------------------------------------------------------|-----|-----------|------|-----|-----|-----|-----------|-------------------|
| Allele                                                  | Genomic typing      | Allele ID | G group                                       | AFA      | API      | EURO     | MENA     | HIS      | NAM      | UNK      | Total    | AFA                                                  | API | EURO      | MENA | HIS | NAM | UNK | Total     | Highest Frequency |
| B*44:180                                                | 44:180              | HLA09706  |                                               | 0        | 0        | 2        | 0        | 0        | 0        | 0        | 2        |                                                      |     |           |      |     |     |     |           |                   |
| B*44:181                                                | 44:181              | HLA09711  |                                               | 0        | 1        | 0        | 0        | 0        | 0        | 0        | 1        |                                                      |     |           |      |     |     |     |           |                   |
| B*44:182                                                | 44:182              | HLA10143  |                                               | 0        | 0        | 1        | 0        | 0        | 0        | 0        | 1        |                                                      |     |           |      |     |     |     |           |                   |
| B*44:185                                                | 44:185              | HLA10406  |                                               | 0        | 0        | 2        | 0        | 0        | 0        | 0        | 2        |                                                      |     |           |      |     |     |     |           |                   |
| B*44:186                                                | 44:186              | HLA10407  |                                               | 0        | 0        | 2        | 0        | 0        | 0        | 0        | 2        |                                                      |     |           |      |     |     |     |           |                   |
| B*44:188                                                | 44:188              | HLA10992  |                                               | 0        | 0        | 3        | 0        | 0        | 0        | 0        | 3        |                                                      |     |           |      |     |     |     |           |                   |
| B*44:189                                                | 44:189              | HLA11015  |                                               | 0        | 0        | 1        | 0        | 1        | 0        | 0        | 2        |                                                      |     |           |      |     |     |     |           |                   |
| B*44:191                                                | 44:191              | HLA11017  |                                               | 1        | 0        | 0        | 0        | 0        | 0        | 0        | 1        |                                                      |     |           |      |     |     |     |           |                   |
| <b>B*44:192 total</b>                                   | <b>44:192 total</b> |           |                                               | <b>0</b> | <b>1</b> | <b>1</b> | <b>0</b> | <b>0</b> | <b>0</b> | <b>0</b> | <b>2</b> |                                                      |     |           |      |     |     |     |           |                   |
| B*44:192                                                | 44:192              |           |                                               | 0        | 1        | 1        | 0        | 0        | 0        | 0        | 2        |                                                      |     |           |      |     |     |     |           |                   |
| B*44:197                                                | 44:197              | HLA11824  |                                               | 0        | 0        | 0        | 1        | 0        | 0        | 0        | 1        |                                                      |     |           |      |     |     |     |           |                   |
| B*44:200                                                | 44:200              | HLA12003  |                                               | 0        | 0        | 1        | 0        | 0        | 0        | 0        | 1        |                                                      |     |           |      |     |     |     |           |                   |
| <b>B*44:205 total</b>                                   | <b>44:205 total</b> |           |                                               | <b>0</b> | <b>1</b> | <b>5</b> | <b>0</b> | <b>0</b> | <b>0</b> | <b>0</b> | <b>6</b> |                                                      |     | <b>WD</b> |      |     |     |     | <b>WD</b> | <b>WD</b>         |
| B*44:205:01                                             | 44:205:01           | HLA12270  |                                               | 0        | 0        | 5        | 0        | 0        | 0        | 0        | 5        |                                                      |     | WD        |      |     |     |     | WD        | WD                |
| B*44:205:02                                             | 44:205:02           | HLA12987  |                                               | 0        | 1        | 0        | 0        | 0        | 0        | 0        | 1        |                                                      |     |           |      |     |     |     |           |                   |
| B*44:206                                                | 44:206              | HLA12272  |                                               | 0        | 0        | 1        | 0        | 0        | 0        | 0        | 1        |                                                      |     |           |      |     |     |     |           |                   |
| <b>B*44:210 total</b>                                   | <b>44:210 total</b> |           |                                               | <b>0</b> | <b>0</b> | <b>1</b> | <b>0</b> | <b>0</b> | <b>0</b> | <b>0</b> | <b>1</b> |                                                      |     |           |      |     |     |     |           |                   |
| B*44:210                                                | 44:210              |           |                                               | 0        | 0        | 1        | 0        | 0        | 0        | 0        | 1        |                                                      |     |           |      |     |     |     |           |                   |
| B*44:212                                                | 44:212              | HLA12424  |                                               | 0        | 0        | 1        | 0        | 0        | 0        | 0        | 1        |                                                      |     |           |      |     |     |     |           |                   |
| B*44:215                                                | 44:215              | HLA12991  |                                               | 0        | 0        | 0        | 0        | 1        | 0        | 0        | 1        |                                                      |     |           |      |     |     |     |           |                   |
| B*44:216                                                | 44:216              | HLA12995  |                                               | 0        | 0        | 1        | 0        | 0        | 0        | 0        | 1        |                                                      |     |           |      |     |     |     |           |                   |
| B*44:217N                                               | 44:217N             | HLA12992  |                                               | 0        | 0        | 1        | 0        | 0        | 0        | 0        | 1        |                                                      |     |           |      |     |     |     |           |                   |
| B*44:221                                                | 44:221              | HLA13539  |                                               | 0        | 0        | 2        | 0        | 0        | 0        | 0        | 2        |                                                      |     |           |      |     |     |     |           |                   |
| B*44:223                                                | 44:223              | HLA13656  |                                               | 0        | 0        | 0        | 0        | 0        | 0        | 1        | 1        |                                                      |     |           |      |     |     |     |           |                   |
| B*44:226                                                | 44:226              | HLA14005  |                                               | 0        | 0        | 2        | 0        | 0        | 0        | 0        | 2        |                                                      |     |           |      |     |     |     |           |                   |
| B*44:227                                                | 44:227              | HLA14007  |                                               | 0        | 3        | 0        | 0        | 0        | 0        | 0        | 3        |                                                      |     |           |      |     |     |     |           |                   |
| B*44:229                                                | 44:229              | HLA14079  |                                               | 0        | 0        | 3        | 0        | 0        | 0        | 0        | 3        |                                                      |     |           |      |     |     |     |           |                   |
| B*44:247                                                | 44:247              | HLA15270  |                                               | 0        | 1        | 0        | 0        | 0        | 0        | 0        | 1        |                                                      |     |           |      |     |     |     |           |                   |
| B*44:254                                                | 44:254              | HLA15555  |                                               | 0        | 0        | 0        | 0        | 0        | 0        | 1        | 1        |                                                      |     |           |      |     |     |     |           |                   |
| B*44:258                                                | 44:258              | HLA15879  |                                               | 0        | 0        | 0        | 0        | 0        | 0        | 3        | 3        |                                                      |     |           |      |     |     |     |           |                   |
| B*44:260                                                | 44:260              | HLA16242  |                                               | 0        | 0        | 1        | 0        | 0        | 0        | 0        | 1        |                                                      |     |           |      |     |     |     |           |                   |

| Supplemental Table 9: HLA-B Allele Summary <sup>a</sup> |                        |           | Allele Count by Population Group <sup>b</sup> |              |              |              |             |              |             |              |              | 3.0.0 CIWD Category by Population Group <sup>c</sup> |          |          |          |          |          |          |          |                   |
|---------------------------------------------------------|------------------------|-----------|-----------------------------------------------|--------------|--------------|--------------|-------------|--------------|-------------|--------------|--------------|------------------------------------------------------|----------|----------|----------|----------|----------|----------|----------|-------------------|
| Allele                                                  | Genomic typing         | Allele ID | G group                                       | AFA          | API          | EURO         | MENA        | HIS          | NAM         | UNK          | Total        | AFA                                                  | API      | EURO     | MENA     | HIS      | NAM      | UNK      | Total    | Highest Frequency |
| B*44:CODE                                               | 44:CODE                |           |                                               | 1699         | 1330         | 81624        | 744         | 5381         | 441         | 9051         | 100270       | NA                                                   | NA       | NA       | NA       | NA       | NA       | NA       | NA       | NA                |
| <b>B*45:01 total</b>                                    | <b>45:01 total</b>     |           |                                               | <b>17480</b> | <b>985</b>   | <b>53933</b> | <b>1981</b> | <b>10947</b> | <b>1240</b> | <b>10826</b> | <b>97392</b> | <b>C</b>                                             | <b>C</b> | <b>C</b> | <b>C</b> | <b>C</b> | <b>C</b> | <b>C</b> | <b>C</b> | <b>C</b>          |
| B*45:01                                                 | 45:01                  |           |                                               | 3            | 0            | 235          | 2           | 1            | 0           | 10           | 251          |                                                      |          | I        |          |          |          | WD       | I        | I                 |
| B*45:01P                                                | 45:01P                 |           |                                               | 1            | 1            | 89           | 3           | 1            | 0           | 1            | 96           |                                                      |          | WD       |          |          |          |          | WD       | WD                |
| <b>B*45:01:01G total</b>                                | <b>45:01:01G total</b> |           |                                               | <b>17474</b> | <b>984</b>   | <b>53609</b> | <b>1976</b> | <b>10945</b> | <b>1240</b> | <b>10815</b> | <b>97043</b> | <b>C</b>                                             | <b>C</b> | <b>C</b> | <b>C</b> | <b>C</b> | <b>C</b> | <b>C</b> | <b>C</b> | <b>C</b>          |
| B*45:01:01G                                             | 45:01:01G              |           | 45:01:01G                                     | 13681        | 862          | 50170        | 1878        | 7809         | 895         | 9218         | 84513        | C                                                    | C        | C        | C        | C        | C        | C        | C        | C                 |
| B*45:01:01                                              | 45:01:01               | HLA00329  | 45:01:01G                                     | 3790         | 122          | 3439         | 98          | 3136         | 345         | 1597         | 12527        | C                                                    | I        | C        | C        | C        | C        | C        | C        | C                 |
| B*45:07                                                 | 45:07                  | HLA01940  | 45:01:01G                                     | 3            | 0            | 0            | 0           | 0            | 0           | 0            | 3            |                                                      |          |          |          |          |          |          |          |                   |
| B*45:01:02                                              | 45:01:02               | HLA11318  |                                               | 1            | 0            | 0            | 0           | 0            | 0           | 0            | 1            |                                                      |          |          |          |          |          |          |          |                   |
| B*45:01:03                                              | 45:01:03               | HLA18018  |                                               | 1            | 0            | 0            | 0           | 0            | 0           | 0            | 1            |                                                      |          |          |          |          |          |          |          |                   |
| B*45:02                                                 | 45:02                  | HLA00330  |                                               | 8            | 0            | 0            | 0           | 0            | 0           | 5            | 13           | WD                                                   |          |          |          |          |          |          | WD       | WD                |
| B*45:04                                                 | 45:04                  | HLA01343  |                                               | 1            | 0            | 0            | 0           | 2            | 0           | 0            | 3            |                                                      |          |          |          |          |          |          |          |                   |
| B*45:06                                                 | 45:06                  | HLA01607  |                                               | 1            | 0            | 0            | 0           | 0            | 0           | 0            | 1            |                                                      |          |          |          |          |          |          |          |                   |
| B*45:08                                                 | 45:08                  | HLA03258  |                                               | 0            | 0            | 1            | 0           | 0            | 0           | 0            | 1            |                                                      |          |          |          |          |          |          |          |                   |
| B*45:09                                                 | 45:09                  | HLA03299  |                                               | 2            | 0            | 1            | 0           | 0            | 0           | 0            | 3            |                                                      |          |          |          |          |          |          |          |                   |
| B*45:11                                                 | 45:11                  | HLA04481  |                                               | 0            | 0            | 2            | 0           | 0            | 0           | 0            | 2            |                                                      |          |          |          |          |          |          |          |                   |
| B*45:14                                                 | 45:14                  | HLA07683  |                                               | 0            | 0            | 4            | 0           | 0            | 0           | 0            | 4            |                                                      |          |          |          |          |          |          |          |                   |
| B*45:16                                                 | 45:16                  | HLA13735  |                                               | 1            | 0            | 0            | 0           | 0            | 0           | 0            | 1            |                                                      |          |          |          |          |          |          |          |                   |
| B*45:17                                                 | 45:17                  | HLA13964  |                                               | 0            | 0            | 0            | 0           | 1            | 0           | 0            | 1            |                                                      |          |          |          |          |          |          |          |                   |
| B*45:CODE                                               | 45:CODE                |           |                                               | 426          | 18           | 1623         | 39          | 305          | 30          | 299          | 2740         | NA                                                   | NA       | NA       | NA       | NA       | NA       | NA       | NA       | NA                |
| <b>B*46:01 total</b>                                    | <b>46:01 total</b>     |           |                                               | <b>41</b>    | <b>28921</b> | <b>2163</b>  | <b>387</b>  | <b>111</b>   | <b>8</b>    | <b>3030</b>  | <b>34661</b> | <b>C</b>                                             | <b>C</b> | <b>C</b> | <b>C</b> | <b>C</b> | <b>C</b> | <b>C</b> | <b>C</b> | <b>C</b>          |
| B*46:01                                                 | 46:01                  |           |                                               | 0            | 7            | 12           | 0           | 1            | 0           | 4            | 24           |                                                      | WD       | WD       |          |          |          |          | WD       | WD                |
| B*46:01P                                                | 46:01P                 |           |                                               | 0            | 1            | 3            | 0           | 0            | 0           | 0            | 4            |                                                      |          |          |          |          |          |          |          |                   |
| <b>B*46:01:01G total</b>                                | <b>46:01:01G total</b> |           |                                               | <b>41</b>    | <b>28904</b> | <b>2148</b>  | <b>387</b>  | <b>110</b>   | <b>8</b>    | <b>3024</b>  | <b>34622</b> | <b>C</b>                                             | <b>C</b> | <b>C</b> | <b>C</b> | <b>C</b> | <b>C</b> | <b>C</b> | <b>C</b> | <b>C</b>          |
| B*46:01:01G                                             | 46:01:01G              |           | 46:01:01G                                     | 30           | 21753        | 2092         | 377         | 81           | 4           | 2093         | 26430        | WD                                                   | C        | C        | C        | C        |          |          | C        | C                 |
| B*46:01:01                                              | 46:01:01               | HLA00331  | 46:01:01G                                     | 11           | 7151         | 56           | 10          | 29           | 4           | 931          | 8192         | WD                                                   | C        | WD       | WD       | I        |          |          | C        | C                 |
| B*46:01:02                                              | 46:01:02               | HLA02685  |                                               | 0            | 6            | 0            | 0           | 0            | 0           | 2            | 8            |                                                      | WD       |          |          |          |          |          | WD       | WD                |
| B*46:01:03                                              | 46:01:03               | HLA04503  |                                               | 0            | 1            | 0            | 0           | 0            | 0           | 0            | 1            |                                                      |          |          |          |          |          |          |          |                   |
| B*46:01:07                                              | 46:01:07               | HLA06360  |                                               | 0            | 1            | 0            | 0           | 0            | 0           | 0            | 1            |                                                      |          |          |          |          |          |          |          |                   |
| B*46:01:18                                              | 46:01:18               | HLA10923  |                                               | 0            | 1            | 0            | 0           | 0            | 0           | 0            | 1            |                                                      |          |          |          |          |          |          |          |                   |
| B*46:11                                                 | 46:11                  | HLA02905  |                                               | 0            | 2            | 0            | 0           | 0            | 0           | 1            | 3            |                                                      |          |          |          |          |          |          |          |                   |

| Supplemental Table 9: HLA-B Allele Summary <sup>a</sup> |                        |           | Allele Count by Population Group <sup>b</sup> |            |             |              |            |              |            |             |              | 3.0.0 CIWD Category by Population Group <sup>c</sup> |          |          |          |          |          |          |          |                   |
|---------------------------------------------------------|------------------------|-----------|-----------------------------------------------|------------|-------------|--------------|------------|--------------|------------|-------------|--------------|------------------------------------------------------|----------|----------|----------|----------|----------|----------|----------|-------------------|
| Allele                                                  | Genomic typing         | Allele ID | G group                                       | AFA        | API         | EURO         | MENA       | HIS          | NAM        | UNK         | Total        | AFA                                                  | API      | EURO     | MENA     | HIS      | NAM      | UNK      | Total    | Highest Frequency |
| <b>B*46:13 total</b>                                    | <b>46:13 total</b>     |           |                                               | 0          | 1           | 0            | 0          | 0            | 0          | 0           | 1            |                                                      |          |          |          |          |          |          |          |                   |
| B*46:13:01                                              | 46:13:01               | HLA03249  |                                               | 0          | 1           | 0            | 0          | 0            | 0          | 0           | 1            |                                                      |          |          |          |          |          |          |          |                   |
| B*46:14                                                 | 46:14                  | HLA03271  |                                               | 0          | 0           | 1            | 0          | 0            | 0          | 0           | 1            |                                                      |          |          |          |          |          |          |          |                   |
| B*46:20                                                 | 46:20                  | HLA03909  |                                               | 0          | 0           | 0            | 0          | 0            | 0          | 1           | 1            |                                                      |          |          |          |          |          |          |          |                   |
| B*46:22                                                 | 46:22                  | HLA04163  |                                               | 0          | 7           | 0            | 0          | 0            | 0          | 0           | 7            |                                                      | WD       |          |          |          |          |          | WD       | WD                |
| B*46:29                                                 | 46:29                  | HLA07280  |                                               | 0          | 1           | 0            | 0          | 0            | 0          | 0           | 1            |                                                      |          |          |          |          |          |          |          |                   |
| B*46:32                                                 | 46:32                  | HLA08314  |                                               | 0          | 0           | 2            | 0          | 0            | 0          | 0           | 2            |                                                      |          |          |          |          |          |          |          |                   |
| B*46:43                                                 | 46:43                  | HLA10033  |                                               | 0          | 1           | 0            | 0          | 0            | 0          | 0           | 1            |                                                      |          |          |          |          |          |          |          |                   |
| B*46:45                                                 | 46:45                  | HLA10489  |                                               | 0          | 1           | 0            | 0          | 0            | 0          | 0           | 1            |                                                      |          |          |          |          |          |          |          |                   |
| B*46:61                                                 | 46:61                  | HLA12286  |                                               | 0          | 1           | 0            | 0          | 0            | 0          | 0           | 1            |                                                      |          |          |          |          |          |          |          |                   |
| B*46:62                                                 | 46:62                  | HLA12287  |                                               | 0          | 2           | 0            | 0          | 0            | 0          | 0           | 2            |                                                      |          |          |          |          |          |          |          |                   |
| B*46:63                                                 | 46:63                  | HLA12288  |                                               | 0          | 1           | 0            | 0          | 0            | 0          | 0           | 1            |                                                      |          |          |          |          |          |          |          |                   |
| B*46:CODE                                               | 46:CODE                |           |                                               | 11         | 1913        | 191          | 34         | 12           | 4          | 255         | 2420         | NA                                                   | NA       | NA       | NA       | NA       | NA       | NA       | NA       | NA                |
| <b>B*47:01 total</b>                                    | <b>47:01 total</b>     |           |                                               | <b>597</b> | <b>632</b>  | <b>34780</b> | <b>782</b> | <b>1540</b>  | <b>124</b> | <b>3143</b> | <b>41598</b> | <b>C</b>                                             | <b>C</b> | <b>C</b> | <b>C</b> | <b>C</b> | <b>C</b> | <b>C</b> | <b>C</b> | <b>C</b>          |
| B*47:01                                                 | 47:01                  |           |                                               | 338        | 86          | 9082         | 184        | 750          | 79         | 1318        | 11837        | C                                                    | I        | C        | C        | C        | C        | C        | C        | C                 |
| B*47:01P                                                | 47:01P                 |           |                                               | 0          | 0           | 7            | 0          | 0            | 0          | 0           | 7            |                                                      |          | WD       |          |          |          |          | WD       | WD                |
| <b>B*47:01:01G total</b>                                | <b>47:01:01G total</b> |           |                                               | <b>259</b> | <b>546</b>  | <b>25690</b> | <b>598</b> | <b>790</b>   | <b>45</b>  | <b>1825</b> | <b>29753</b> | <b>C</b>                                             | <b>C</b> | <b>C</b> | <b>C</b> | <b>C</b> | <b>C</b> | <b>C</b> | <b>C</b> | <b>C</b>          |
| B*47:01:01G                                             | 47:01:01G              |           | 47:01:01G                                     | 152        | 476         | 23547        | 558        | 347          | 13         | 1525        | 26618        | C                                                    | C        | C        | C        | C        | C        | C        | C        | C                 |
| B*47:01:01                                              | 47:01:01               |           | 47:01:01G                                     | 23         | 24          | 955          | 13         | 138          | 10         | 147         | 1310         | WD                                                   | I        | I        | WD       | C        | C        | C        | I        | C                 |
| B*47:01:01:03                                           | 47:01:01:03            | HLA14088  | 47:01:01G                                     | 84         | 46          | 1188         | 27         | 305          | 22         | 153         | 1825         | C                                                    | I        | I        | WD       | C        | C        | C        | C        | C                 |
| B*47:01:03                                              | 47:01:03               | HLA16392  |                                               | 0          | 0           | 1            | 0          | 0            | 0          | 0           | 1            |                                                      |          |          |          |          |          |          |          |                   |
| B*47:02                                                 | 47:02                  | HLA00333  |                                               | 6          | 3           | 1062         | 0          | 1            | 1          | 10          | 1083         | WD                                                   |          | I        |          |          |          |          | WD       | I                 |
| B*47:03                                                 | 47:03                  | HLA00334  |                                               | 261        | 0           | 53           | 159        | 7            | 1          | 48          | 529          | C                                                    |          | WD       | C        | WD       |          |          | I        | I                 |
| B*47:04                                                 | 47:04                  | HLA01481  |                                               | 0          | 0           | 6            | 0          | 0            | 0          | 6           | 12           |                                                      |          | WD       |          |          |          |          | WD       | WD                |
| B*47:05                                                 | 47:05                  | HLA01953  |                                               | 4          | 0           | 0            | 0          | 0            | 0          | 1           | 5            |                                                      |          |          |          |          |          |          | WD       | WD                |
| B*47:08                                                 | 47:08                  | HLA06219  |                                               | 0          | 0           | 3            | 0          | 0            | 0          | 0           | 3            |                                                      |          |          |          |          |          |          |          |                   |
| B*47:10                                                 | 47:10                  | HLA12994  |                                               | 0          | 0           | 0            | 0          | 2            | 0          | 0           | 2            |                                                      |          |          |          |          |          |          |          |                   |
| B*47:CODE                                               | 47:CODE                |           |                                               | 9          | 0           | 762          | 1          | 22           | 2          | 49          | 845          | NA                                                   | NA       | NA       | NA       | NA       | NA       | NA       | NA       | NA                |
| <b>B*48:01 total</b>                                    | <b>48:01 total</b>     |           |                                               | <b>203</b> | <b>9146</b> | <b>8134</b>  | <b>960</b> | <b>12351</b> | <b>898</b> | <b>5162</b> | <b>36854</b> | <b>C</b>                                             | <b>C</b> | <b>C</b> | <b>C</b> | <b>C</b> | <b>C</b> | <b>C</b> | <b>C</b> | <b>C</b>          |
| B*48:01                                                 | 48:01                  |           |                                               | 0          | 1           | 37           | 0          | 7            | 0          | 3           | 48           |                                                      |          | WD       |          | WD       |          |          | WD       | WD                |
| B*48:01P                                                | 48:01P                 |           |                                               | 0          | 0           | 4            | 0          | 0            | 0          | 0           | 4            |                                                      |          |          |          |          |          |          |          |                   |

| Supplemental Table 9: HLA-B Allele Summary <sup>a</sup> |                        |           | Allele Count by Population Group <sup>b</sup> |            |             |             |            |              |            |             |              | 3.0.0 CIWD Category by Population Group <sup>c</sup> |           |           |          |          |          |          |          |                   |
|---------------------------------------------------------|------------------------|-----------|-----------------------------------------------|------------|-------------|-------------|------------|--------------|------------|-------------|--------------|------------------------------------------------------|-----------|-----------|----------|----------|----------|----------|----------|-------------------|
| Allele                                                  | Genomic typing         | Allele ID | G group                                       | AFA        | API         | EURO        | MENA       | HIS          | NAM        | UNK         | Total        | AFA                                                  | API       | EURO      | MENA     | HIS      | NAM      | UNK      | Total    | Highest Frequency |
| <b>B*48:01:01G total</b>                                | <b>48:01:01G total</b> |           |                                               | <b>203</b> | <b>9145</b> | <b>8093</b> | <b>960</b> | <b>12344</b> | <b>898</b> | <b>5159</b> | <b>36802</b> | <b>C</b>                                             | <b>C</b>  | <b>C</b>  | <b>C</b> | <b>C</b> | <b>C</b> | <b>C</b> | <b>C</b> | <b>C</b>          |
| B*48:01:01G                                             | 48:01:01G              |           | 48:01:01G                                     | 141        | 7429        | 7700        | 942        | 8526         | 628        | 4234        | 29600        | C                                                    | C         | C         | C        | C        | C        | C        | C        | C                 |
| B*48:01:01                                              | 48:01:01               |           | 48:01:01G                                     | 62         | 1716        | 393         | 18         | 3818         | 270        | 925         | 7202         | C                                                    | C         | I         | WD       | C        | C        | C        | C        | C                 |
| <b>B*48:02 total</b>                                    | <b>48:02 total</b>     |           |                                               | <b>40</b>  | <b>5</b>    | <b>321</b>  | <b>1</b>   | <b>677</b>   | <b>120</b> | <b>423</b>  | <b>1587</b>  | <b>C</b>                                             | <b>WD</b> | <b>I</b>  |          | <b>C</b> | <b>C</b> | <b>C</b> | <b>I</b> | <b>C</b>          |
| B*48:02                                                 | 48:02                  |           |                                               | 2          | 0           | 121         | 0          | 124          | 15         | 82          | 344          |                                                      |           | I         |          | C        | C        | I        | I        | C                 |
| B*48:02:01                                              | 48:02:01               | HLA00336  |                                               | 38         | 5           | 199         | 1          | 547          | 104        | 341         | 1235         | WD                                                   | WD        | I         |          | C        | C        | C        | I        | C                 |
| B*48:02:02                                              | 48:02:02               | HLA04461  |                                               | 0          | 0           | 0           | 0          | 1            | 1          | 0           | 2            |                                                      |           |           |          |          |          |          |          |                   |
| B*48:02:03                                              | 48:02:03               | HLA08378  |                                               | 0          | 0           | 1           | 0          | 5            | 0          | 0           | 6            |                                                      |           |           |          | WD       |          |          | WD       | WD                |
| <b>B*48:03 total</b>                                    | <b>48:03 total</b>     |           |                                               | <b>5</b>   | <b>842</b>  | <b>184</b>  | <b>1</b>   | <b>526</b>   | <b>27</b>  | <b>296</b>  | <b>1881</b>  | <b>WD</b>                                            | <b>C</b>  | <b>I</b>  |          | <b>C</b> | <b>C</b> | <b>C</b> | <b>C</b> | <b>C</b>          |
| B*48:03                                                 | 48:03                  |           |                                               | 0          | 45          | 42          | 0          | 64           | 2          | 39          | 192          |                                                      | I         | WD        |          | I        |          | I        | I        | I                 |
| B*48:03:01                                              | 48:03:01               | HLA00337  |                                               | 5          | 797         | 140         | 1          | 442          | 25         | 256         | 1666         | WD                                                   | C         | I         |          | C        | C        | C        | C        | C                 |
| B*48:03:02                                              | 48:03:02               | HLA02727  |                                               | 0          | 0           | 2           | 0          | 20           | 0          | 1           | 23           |                                                      |           |           |          | I        |          |          | WD       | I                 |
| <b>B*48:04 total</b>                                    | <b>48:04 total</b>     |           |                                               | <b>0</b>   | <b>3736</b> | <b>9</b>    | <b>0</b>   | <b>1</b>     | <b>0</b>   | <b>104</b>  | <b>3850</b>  |                                                      | <b>C</b>  | <b>WD</b> |          |          |          | <b>I</b> | <b>C</b> | <b>C</b>          |
| B*48:04                                                 | 48:04                  |           |                                               | 0          | 1372        | 3           | 0          | 1            | 0          | 75          | 1451         |                                                      | C         |           |          |          |          | I        | I        | C                 |
| B*48:04:01                                              | 48:04:01               | HLA00338  |                                               | 0          | 2363        | 6           | 0          | 0            | 0          | 29          | 2398         |                                                      | C         | WD        |          |          |          | I        | C        | C                 |
| B*48:04:02                                              | 48:04:02               | HLA13543  |                                               | 0          | 1           | 0           | 0          | 0            | 0          | 0           | 1            |                                                      |           |           |          |          |          |          |          |                   |
| B*48:05                                                 | 48:05                  | HLA00339  |                                               | 20         | 0           | 0           | 11         | 0            | 0          | 2           | 33           | WD                                                   |           |           | WD       |          |          |          | WD       | WD                |
| B*48:06                                                 | 48:06                  | HLA00986  |                                               | 3          | 1           | 0           | 0          | 5            | 0          | 1           | 10           |                                                      |           |           |          | WD       |          |          | WD       | WD                |
| B*48:07                                                 | 48:07                  | HLA01069  |                                               | 2          | 1           | 6           | 0          | 7            | 13         | 24          | 53           |                                                      |           | WD        |          | WD       | C        | I        | WD       | C                 |
| B*48:11                                                 | 48:11                  | HLA02104  |                                               | 0          | 1           | 0           | 0          | 0            | 0          | 0           | 1            |                                                      |           |           |          |          |          |          |          |                   |
| B*48:12                                                 | 48:12                  | HLA02112  |                                               | 1          | 0           | 4           | 0          | 19           | 2          | 2           | 28           |                                                      |           |           |          | I        |          |          | WD       | I                 |
| B*48:13                                                 | 48:13                  | HLA02200  |                                               | 1          | 0           | 2           | 0          | 10           | 1          | 3           | 17           |                                                      |           |           |          | I        |          |          | WD       | I                 |
| B*48:20                                                 | 48:20                  | HLA04245  |                                               | 0          | 1           | 0           | 0          | 0            | 0          | 0           | 1            |                                                      |           |           |          |          |          |          |          |                   |
| B*48:21                                                 | 48:21                  | HLA04433  |                                               | 0          | 0           | 0           | 0          | 0            | 0          | 1           | 1            |                                                      |           |           |          |          |          |          |          |                   |
| B*48:24                                                 | 48:24                  | HLA05475  |                                               | 0          | 6           | 0           | 0          | 0            | 0          | 0           | 6            |                                                      | WD        |           |          |          |          |          | WD       | WD                |
| B*48:26                                                 | 48:26                  | HLA07209  |                                               | 0          | 0           | 2           | 0          | 0            | 0          | 6           | 8            |                                                      |           |           |          |          |          |          | WD       | WD                |
| B*48:27                                                 | 48:27                  | HLA07210  |                                               | 0          | 0           | 0           | 0          | 1            | 0          | 0           | 1            |                                                      |           |           |          |          |          |          |          |                   |
| B*48:29                                                 | 48:29                  | HLA08903  |                                               | 0          | 1           | 0           | 0          | 3            | 1          | 2           | 7            |                                                      |           |           |          |          |          |          | WD       | WD                |
| B*48:33                                                 | 48:33                  | HLA10421  |                                               | 0          | 1           | 0           | 0          | 0            | 0          | 0           | 1            |                                                      |           |           |          |          |          |          |          |                   |
| B*48:36                                                 | 48:36                  | HLA12018  |                                               | 0          | 0           | 0           | 0          | 1            | 0          | 0           | 1            |                                                      |           |           |          |          |          |          |          |                   |
| B*48:38                                                 | 48:38                  | HLA14316  |                                               | 0          | 0           | 0           | 0          | 1            | 0          | 0           | 1            |                                                      |           |           |          |          |          |          |          |                   |



| Supplemental Table 9: HLA-B Allele Summary <sup>a</sup> |                        |           | Allele Count by Population Group <sup>b</sup> |              |             |               |              |              |             |              |               | 3.0.0 CIWD Category by Population Group <sup>c</sup> |          |           |          |           |          |           |           |                   |
|---------------------------------------------------------|------------------------|-----------|-----------------------------------------------|--------------|-------------|---------------|--------------|--------------|-------------|--------------|---------------|------------------------------------------------------|----------|-----------|----------|-----------|----------|-----------|-----------|-------------------|
| Allele                                                  | Genomic typing         | Allele ID | G group                                       | AFA          | API         | EURO          | MENA         | HIS          | NAM         | UNK          | Total         | AFA                                                  | API      | EURO      | MENA     | HIS       | NAM      | UNK       | Total     | Highest Frequency |
| B*48:39                                                 | 48:39                  | HLA14985  |                                               | 0            | 0           | 1             | 0            | 1            | 0           | 2            | 4             |                                                      |          |           |          |           |          |           |           |                   |
| B*48:41                                                 | 48:41                  | HLA15642  |                                               | 0            | 1           | 0             | 0            | 0            | 0           | 0            | 1             |                                                      |          |           |          |           |          |           |           |                   |
| B*48:CODE                                               | 48:CODE                |           |                                               | 15           | 224         | 936           | 48           | 639          | 33          | 306          | 2201          | NA                                                   | NA       | NA        | NA       | NA        | NA       | NA        | NA        | NA                |
| <b>B*49:01 total</b>                                    | <b>49:01 total</b>     |           |                                               | <b>12237</b> | <b>5417</b> | <b>168106</b> | <b>14358</b> | <b>15754</b> | <b>1339</b> | <b>24188</b> | <b>241399</b> | <b>C</b>                                             | <b>C</b> | <b>C</b>  | <b>C</b> | <b>C</b>  | <b>C</b> | <b>C</b>  | <b>C</b>  | <b>C</b>          |
| B*49:01                                                 | 49:01                  |           |                                               | 5220         | 466         | 31050         | 2845         | 6409         | 629         | 9538         | 56157         | C                                                    | C        | C         | C        | C         | C        | C         | C         | C                 |
| B*49:01P                                                | 49:01P                 |           |                                               | 1            | 0           | 116           | 1            | 2            | 0           | 0            | 120           |                                                      |          | WD        |          |           |          |           | WD        | WD                |
| <b>B*49:01:01G total</b>                                | <b>49:01:01G total</b> |           |                                               | <b>7016</b>  | <b>4951</b> | <b>136925</b> | <b>11511</b> | <b>9343</b>  | <b>710</b>  | <b>14650</b> | <b>185106</b> | <b>C</b>                                             | <b>C</b> | <b>C</b>  | <b>C</b> | <b>C</b>  | <b>C</b> | <b>C</b>  | <b>C</b>  | <b>C</b>          |
| B*49:01:01G                                             | 49:01:01G              |           | 49:01:01G                                     | 2432         | 4038        | 105974        | 9434         | 3407         | 106         | 8544         | 133935        | C                                                    | C        | C         | C        | C         | C        | C         | C         | C                 |
| B*49:01:01                                              | 49:01:01               |           | 49:01:01G                                     | 4584         | 913         | 30947         | 2076         | 5936         | 604         | 6106         | 51166         | C                                                    | C        | C         | C        | C         | C        | C         | C         | C                 |
| B*49:01:01:01                                           | 49:01:01:01            | HLA00340  | 49:01:01G                                     | 0            | 0           | 2             | 1            | 0            | 0           | 0            | 3             |                                                      |          |           |          |           |          |           |           |                   |
| B*49:01:01:02                                           | 49:01:01:02            | HLA17557  | 49:01:01G                                     | 0            | 0           | 2             | 0            | 0            | 0           | 0            | 2             |                                                      |          |           |          |           |          |           |           |                   |
| B*49:01:06                                              | 49:01:06               | HLA10996  |                                               | 0            | 0           | 1             | 0            | 0            | 0           | 0            | 1             |                                                      |          |           |          |           |          |           |           |                   |
| B*49:38                                                 | 49:38                  | HLA13402  |                                               | 0            | 0           | 14            | 1            | 0            | 0           | 0            | 15            |                                                      |          | WD        |          |           |          |           | WD        | WD                |
| B*49:02                                                 | 49:02                  | HLA01252  |                                               | 0            | 0           | 2             | 0            | 1            | 0           | 1            | 4             |                                                      |          |           |          |           |          |           |           |                   |
| <b>B*49:04 total</b>                                    | <b>49:04 total</b>     |           |                                               | <b>0</b>     | <b>0</b>    | <b>6</b>      | <b>0</b>     | <b>0</b>     | <b>0</b>    | <b>0</b>     | <b>6</b>      |                                                      |          | <b>WD</b> |          |           |          |           | <b>WD</b> | <b>WD</b>         |
| B*49:04                                                 | 49:04                  |           |                                               | 0            | 0           | 4             | 0            | 0            | 0           | 0            | 4             |                                                      |          |           |          |           |          |           |           |                   |
| B*49:04:01                                              | 49:04:01               | HLA02209  |                                               | 0            | 0           | 2             | 0            | 0            | 0           | 0            | 2             |                                                      |          |           |          |           |          |           |           |                   |
| B*49:06                                                 | 49:06                  | HLA04098  |                                               | 0            | 0           | 1             | 0            | 0            | 0           | 0            | 1             |                                                      |          |           |          |           |          |           |           |                   |
| B*49:09                                                 | 49:09                  | HLA04538  |                                               | 0            | 0           | 0             | 8            | 0            | 0           | 0            | 8             |                                                      |          |           | WD       |           |          |           | WD        | WD                |
| B*49:10                                                 | 49:10                  | HLA04706  |                                               | 0            | 0           | 0             | 0            | 2            | 0           | 0            | 2             |                                                      |          |           |          |           |          |           |           |                   |
| B*49:11                                                 | 49:11                  | HLA05484  |                                               | 0            | 0           | 2             | 2            | 0            | 0           | 0            | 4             |                                                      |          |           |          |           |          |           |           |                   |
| B*49:16                                                 | 49:16                  | HLA06227  |                                               | 0            | 0           | 3             | 0            | 1            | 0           | 0            | 4             |                                                      |          |           |          |           |          |           |           |                   |
| B*49:17                                                 | 49:17                  | HLA06352  |                                               | 0            | 0           | 0             | 0            | 1            | 0           | 0            | 1             |                                                      |          |           |          |           |          |           |           |                   |
| <b>B*49:18 total</b>                                    | <b>49:18 total</b>     |           |                                               | <b>0</b>     | <b>0</b>    | <b>4</b>      | <b>0</b>     | <b>6</b>     | <b>0</b>    | <b>8</b>     | <b>18</b>     |                                                      |          |           |          | <b>WD</b> |          | <b>WD</b> | <b>WD</b> | <b>WD</b>         |
| B*49:18:02                                              | 49:18:02               | HLA14986  |                                               | 0            | 0           | 4             | 0            | 6            | 0           | 8            | 18            |                                                      |          |           |          | WD        |          | WD        | WD        | WD                |
| B*49:20                                                 | 49:20                  | HLA06932  |                                               | 0            | 0           | 1             | 0            | 0            | 0           | 0            | 1             |                                                      |          |           |          |           |          |           |           |                   |
| B*49:21                                                 | 49:21                  | HLA07958  |                                               | 0            | 0           | 1             | 0            | 0            | 0           | 0            | 1             |                                                      |          |           |          |           |          |           |           |                   |
| B*49:23                                                 | 49:23                  | HLA08324  |                                               | 0            | 0           | 1             | 0            | 0            | 0           | 0            | 1             |                                                      |          |           |          |           |          |           |           |                   |
| B*49:25                                                 | 49:25                  | HLA08670  |                                               | 0            | 0           | 0             | 0            | 0            | 0           | 3            | 3             |                                                      |          |           |          |           |          |           |           |                   |
| B*49:31                                                 | 49:31                  | HLA11445  |                                               | 0            | 0           | 1             | 0            | 0            | 0           | 1            | 2             |                                                      |          |           |          |           |          |           |           |                   |
| B*49:37                                                 | 49:37                  | HLA12975  |                                               | 1            | 0           | 0             | 0            | 0            | 0           | 0            | 1             |                                                      |          |           |          |           |          |           |           |                   |

| Supplemental Table 9: HLA-B Allele Summary <sup>a</sup> |                        |           | Allele Count by Population Group <sup>b</sup> |             |              |               |              |              |             |              |               | 3.0.0 CIWD Category by Population Group <sup>c</sup> |          |          |          |          |          |          |          |                   |
|---------------------------------------------------------|------------------------|-----------|-----------------------------------------------|-------------|--------------|---------------|--------------|--------------|-------------|--------------|---------------|------------------------------------------------------|----------|----------|----------|----------|----------|----------|----------|-------------------|
| Allele                                                  | Genomic typing         | Allele ID | G group                                       | AFA         | API          | EURO          | MENA         | HIS          | NAM         | UNK          | Total         | AFA                                                  | API      | EURO     | MENA     | HIS      | NAM      | UNK      | Total    | Highest Frequency |
| B*49:41                                                 | 49:41                  | HLA14433  |                                               | 0           | 0            | 1             | 0            | 0            | 0           | 0            | 1             |                                                      |          |          |          |          |          |          |          |                   |
| B*49:CODE                                               | 49:CODE                |           |                                               | 402         | 46           | 9682          | 375          | 978          | 49          | 1369         | 12901         | NA                                                   | NA       | NA       | NA       | NA       | NA       | NA       | NA       | NA                |
| <b>B*50:01 total</b>                                    | <b>50:01 total</b>     |           |                                               | <b>3639</b> | <b>13457</b> | <b>124242</b> | <b>20314</b> | <b>9468</b>  | <b>863</b>  | <b>19612</b> | <b>191595</b> | <b>C</b>                                             | <b>C</b> | <b>C</b> | <b>C</b> | <b>C</b> | <b>C</b> | <b>C</b> | <b>C</b> | <b>C</b>          |
| B*50:01                                                 | 50:01                  |           |                                               | 86          | 484          | 7035          | 790          | 205          | 17          | 591          | 9208          | C                                                    | C        | C        | C        | C        | C        | C        | C        | C                 |
| B*50:01P                                                | 50:01P                 |           |                                               | 0           | 2            | 231           | 1            | 1            | 0           | 1            | 236           |                                                      |          | I        |          |          |          |          | I        | I                 |
| <b>B*50:01:01G total</b>                                | <b>50:01:01G total</b> |           |                                               | <b>3553</b> | <b>12970</b> | <b>116975</b> | <b>19523</b> | <b>9262</b>  | <b>846</b>  | <b>19020</b> | <b>182149</b> | <b>C</b>                                             | <b>C</b> | <b>C</b> | <b>C</b> | <b>C</b> | <b>C</b> | <b>C</b> | <b>C</b> | <b>C</b>          |
| B*50:01:01G                                             | 50:01:01G              |           | 50:01:01G                                     | 1500        | 9231         | 75060         | 14967        | 4127         | 258         | 11806        | 116949        | C                                                    | C        | C        | C        | C        | C        | C        | C        | C                 |
| B*50:01:01                                              | 50:01:01               |           | 50:01:01G                                     | 1939        | 3663         | 40965         | 4468         | 4765         | 566         | 7025         | 63391         | C                                                    | C        | C        | C        | C        | C        | C        | C        | C                 |
| B*50:01:01:01                                           | 50:01:01:01            | HLA00341  | 50:01:01G                                     | 79          | 74           | 819           | 88           | 275          | 19          | 160          | 1514          | C                                                    | I        | I        | C        | C        | C        | C        | I        | C                 |
| B*50:01:01:02                                           | 50:01:01:02            | HLA16418  | 50:01:01G                                     | 35          | 2            | 131           | 0            | 95           | 3           | 29           | 295           | WD                                                   |          | I        |          | C        |          | I        | I        | C                 |
| B*50:01:02                                              | 50:01:02               | HLA04100  |                                               | 0           | 0            | 1             | 0            | 0            | 0           | 0            | 1             |                                                      |          |          |          |          |          |          |          |                   |
| B*50:01:04                                              | 50:01:04               | HLA10514  |                                               | 0           | 1            | 0             | 0            | 0            | 0           | 0            | 1             |                                                      |          |          |          |          |          |          |          |                   |
| B*50:02                                                 | 50:02                  | HLA00342  |                                               | 64          | 35           | 3479          | 422          | 1460         | 50          | 1653         | 7163          | C                                                    | I        | C        | C        | C        | C        | C        | C        | C                 |
| B*50:04                                                 | 50:04                  | HLA01070  |                                               | 0           | 61           | 1             | 0            | 1            | 0           | 0            | 63            |                                                      | I        |          |          |          |          |          | WD       | I                 |
| B*50:06                                                 | 50:06                  | HLA04108  |                                               | 0           | 0            | 0             | 0            | 0            | 0           | 1            | 1             |                                                      |          |          |          |          |          |          |          |                   |
| B*50:07                                                 | 50:07                  | HLA04180  |                                               | 0           | 1            | 0             | 1            | 0            | 0           | 0            | 2             |                                                      |          |          |          |          |          |          |          |                   |
| B*50:08                                                 | 50:08                  | HLA04182  |                                               | 0           | 0            | 9             | 0            | 0            | 0           | 0            | 9             |                                                      |          | WD       |          |          |          |          | WD       | WD                |
| B*50:09                                                 | 50:09                  | HLA04239  |                                               | 0           | 0            | 5             | 0            | 0            | 0           | 0            | 5             |                                                      |          | WD       |          |          |          |          | WD       | WD                |
| B*50:12                                                 | 50:12                  | HLA05499  |                                               | 0           | 0            | 13            | 0            | 0            | 0           | 0            | 13            |                                                      |          | WD       |          |          |          |          | WD       | WD                |
| B*50:14                                                 | 50:14                  | HLA06835  |                                               | 0           | 0            | 1             | 0            | 0            | 0           | 0            | 1             |                                                      |          |          |          |          |          |          |          |                   |
| B*50:17                                                 | 50:17                  | HLA07968  |                                               | 1           | 0            | 0             | 0            | 0            | 0           | 0            | 1             |                                                      |          |          |          |          |          |          |          |                   |
| B*50:18                                                 | 50:18                  | HLA08559  |                                               | 0           | 0            | 2             | 0            | 0            | 0           | 0            | 2             |                                                      |          |          |          |          |          |          |          |                   |
| B*50:32                                                 | 50:32                  | HLA09316  |                                               | 0           | 0            | 0             | 0            | 1            | 0           | 0            | 1             |                                                      |          |          |          |          |          |          |          |                   |
| B*50:35                                                 | 50:35                  | HLA10399  |                                               | 0           | 0            | 0             | 0            | 1            | 0           | 0            | 1             |                                                      |          |          |          |          |          |          |          |                   |
| B*50:40                                                 | 50:40                  | HLA12560  |                                               | 0           | 0            | 1             | 0            | 0            | 0           | 0            | 1             |                                                      |          |          |          |          |          |          |          |                   |
| B*50:41                                                 | 50:41                  | HLA12561  |                                               | 0           | 0            | 0             | 1            | 0            | 0           | 0            | 1             |                                                      |          |          |          |          |          |          |          |                   |
| B*50:44                                                 | 50:44                  | HLA14601  |                                               | 0           | 0            | 1             | 0            | 0            | 0           | 0            | 1             |                                                      |          |          |          |          |          |          |          |                   |
| B*50:CODE                                               | 50:CODE                |           |                                               | 138         | 93           | 5766          | 191          | 583          | 30          | 762          | 7563          | NA                                                   | NA       | NA       | NA       | NA       | NA       | NA       | NA       | NA                |
| <b>B*51:01 total</b>                                    | <b>51:01 total</b>     |           |                                               | <b>8927</b> | <b>89847</b> | <b>620443</b> | <b>47811</b> | <b>38568</b> | <b>3716</b> | <b>66227</b> | <b>875539</b> | <b>C</b>                                             | <b>C</b> | <b>C</b> | <b>C</b> | <b>C</b> | <b>C</b> | <b>C</b> | <b>C</b> | <b>C</b>          |
| B*51:01                                                 | 51:01                  |           |                                               | 7           | 129          | 4598          | 22           | 17           | 0           | 198          | 4971          | WD                                                   | I        | C        | WD       | I        |          |          | C        | C                 |
| B*51:01P                                                | 51:01P                 |           |                                               | 1           | 11           | 1390          | 5            | 7            | 0           | 6            | 1420          |                                                      | WD       | C        | WD       | WD       |          |          | WD       | I                 |

| Supplemental Table 9: HLA-B Allele Summary <sup>a</sup> |                        |           | Allele Count by Population Group <sup>b</sup> |             |              |               |              |              |             |              |               | 3.0.0 CIWD Category by Population Group <sup>c</sup> |     |      |      |     |     |     |       |                   |   |
|---------------------------------------------------------|------------------------|-----------|-----------------------------------------------|-------------|--------------|---------------|--------------|--------------|-------------|--------------|---------------|------------------------------------------------------|-----|------|------|-----|-----|-----|-------|-------------------|---|
| Allele                                                  | Genomic typing         | Allele ID | G group                                       | AFA         | API          | EURO          | MENA         | HIS          | NAM         | UNK          | Total         | AFA                                                  | API | EURO | MENA | HIS | NAM | UNK | Total | Highest Frequency |   |
| <b>B*51:01:01G total</b>                                | <b>51:01:01G total</b> |           |                                               | <b>8845</b> | <b>87187</b> | <b>614250</b> | <b>47767</b> | <b>38508</b> | <b>3715</b> | <b>65481</b> | <b>865753</b> | C                                                    | C   | C    | C    | C   | C   | C   | C     | C                 |   |
| B*51:01:01G                                             | 51:01:01G              |           | 51:01:01G                                     | 6671        | 79969        | 584231        | 46826        | 26742        | 2623        | 59421        | 806483        | C                                                    | C   | C    | C    | C   | C   | C   | C     | C                 |   |
| B*51:01:01                                              | 51:01:01               |           | 51:01:01G                                     | 959         | 2796         | 11089         | 408          | 5048         | 387         | 2905         | 23592         | C                                                    | C   | C    | C    | C   | C   | C   | C     | C                 |   |
| B*51:01:01:01                                           | 51:01:01:01            | HLA00344  | 51:01:01G                                     | 1208        | 4319         | 18724         | 529          | 6624         | 700         | 3118         | 35222         | C                                                    | C   | C    | C    | C   | C   | C   | C     | C                 |   |
| B*51:01:01:02                                           | 51:01:01:02            | HLA12698  | 51:01:01G                                     | 0           | 0            | 2             | 1            | 0            | 0           | 0            | 3             |                                                      |     |      |      |     |     |     |       |                   |   |
| B*51:01:01:03                                           | 51:01:01:03            | HLA16059  | 51:01:01G                                     | 0           | 0            | 5             | 0            | 0            | 0           | 0            | 5             |                                                      |     | WD   |      |     |     |     | WD    | WD                |   |
| B*51:01:01:04                                           | 51:01:01:04            | HLA16294  | 51:01:01G                                     | 0           | 0            | 34            | 0            | 0            | 0           | 0            | 34            |                                                      |     | WD   |      |     |     |     | WD    | WD                |   |
| B*51:01:01:05                                           | 51:01:01:05            | HLA16295  | 51:01:01G                                     | 0           | 0            | 1             | 0            | 0            | 0           | 0            | 1             |                                                      |     |      |      |     |     |     |       |                   |   |
| B*51:01:01:06                                           | 51:01:01:06            | HLA16296  | 51:01:01G                                     | 0           | 0            | 4             | 0            | 0            | 0           | 0            | 4             |                                                      |     |      |      |     |     |     |       |                   |   |
| B*51:01:01:09                                           | 51:01:01:09            | HLA16300  | 51:01:01G                                     | 0           | 0            | 1             | 0            | 0            | 0           | 0            | 1             |                                                      |     |      |      |     |     |     |       |                   |   |
| B*51:01:01:10                                           | 51:01:01:10            | HLA16301  | 51:01:01G                                     | 0           | 0            | 2             | 0            | 0            | 0           | 0            | 2             |                                                      |     |      |      |     |     |     |       |                   |   |
| B*51:01:01:11                                           | 51:01:01:11            | HLA16302  | 51:01:01G                                     | 0           | 0            | 8             | 0            | 0            | 0           | 0            | 8             |                                                      |     | WD   |      |     |     |     | WD    | WD                |   |
| B*51:01:01:14                                           | 51:01:01:14            | HLA16688  | 51:01:01G                                     | 0           | 0            | 27            | 1            | 0            | 0           | 4            | 32            |                                                      |     | WD   |      |     |     |     | WD    | WD                |   |
| B*51:01:01:17                                           | 51:01:01:17            | HLA16691  | 51:01:01G                                     | 0           | 0            | 1             | 0            | 0            | 0           | 0            | 1             |                                                      |     |      |      |     |     |     |       |                   |   |
| B*51:01:01:18                                           | 51:01:01:18            | HLA16692  | 51:01:01G                                     | 0           | 0            | 1             | 0            | 0            | 0           | 0            | 1             |                                                      |     |      |      |     |     |     |       |                   |   |
| B*51:01:01:19                                           | 51:01:01:19            | HLA16693  | 51:01:01G                                     | 0           | 0            | 2             | 0            | 0            | 0           | 0            | 2             |                                                      |     |      |      |     |     |     |       |                   |   |
| B*51:01:01:20                                           | 51:01:01:20            | HLA16694  | 51:01:01G                                     | 1           | 1            | 0             | 0            | 0            | 0           | 0            | 2             |                                                      |     |      |      |     |     |     |       |                   |   |
| B*51:01:01:21                                           | 51:01:01:21            | HLA16695  | 51:01:01G                                     | 0           | 0            | 16            | 0            | 2            | 0           | 3            | 21            |                                                      |     | WD   |      |     |     |     | WD    | WD                |   |
| B*51:01:05                                              | 51:01:05               | HLA01579  | 51:01:01G                                     | 1           | 98           | 2             | 0            | 2            | 0           | 7            | 110           |                                                      | I   |      |      |     |     |     | WD    | WD                | I |
| B*51:01:07                                              | 51:01:07               | HLA02232  | 51:01:01G                                     | 2           | 0            | 24            | 0            | 18           | 1           | 6            | 51            |                                                      |     | WD   |      | I   |     |     | WD    | WD                | I |
| B*51:01:35                                              | 51:01:35               | HLA08395  | 51:01:01G                                     | 0           | 0            | 2             | 0            | 17           | 0           | 1            | 20            |                                                      |     |      |      | I   |     |     | WD    | I                 |   |
| B*51:01:44                                              | 51:01:44               | HLA10460  | 51:01:01G                                     | 0           | 1            | 0             | 0            | 0            | 0           | 1            | 2             |                                                      |     |      |      |     |     |     |       |                   |   |
| B*51:01:56                                              | 51:01:56               | HLA16744  | 51:01:01G                                     | 0           | 0            | 1             | 0            | 0            | 0           | 1            | 2             |                                                      |     |      |      |     |     |     |       |                   |   |
| B*51:11N                                                | 51:11N                 | HLA00356  | 51:01:01G                                     | 2           | 0            | 17            | 0            | 2            | 0           | 3            | 24            |                                                      |     | WD   |      |     |     |     | WD    | WD                |   |
| B*51:32                                                 | 51:32                  | HLA01657  | 51:01:01G                                     | 1           | 0            | 9             | 2            | 16           | 1           | 5            | 34            |                                                      |     | WD   |      | I   |     |     | WD    | WD                | I |
| B*51:48                                                 | 51:48                  | HLA02885  | 51:01:01G                                     | 0           | 1            | 0             | 0            | 0            | 0           | 0            | 1             |                                                      |     |      |      |     |     |     |       |                   |   |
| B*51:51                                                 | 51:51                  | HLA03123  | 51:01:01G                                     | 0           | 1            | 6             | 0            | 0            | 0           | 1            | 8             |                                                      |     | WD   |      |     |     |     | WD    | WD                |   |
| B*51:193                                                | 51:193                 | HLA13998  | 51:01:01G                                     | 0           | 1            | 41            | 0            | 37           | 3           | 5            | 87            |                                                      |     | WD   |      | I   |     |     | WD    | WD                | I |
| B*51:01:02                                              | 51:01:02               | HLA00345  |                                               | 72          | 2474         | 119           | 13           | 32           | 1           | 524          | 3235          | C                                                    | C   | WD   | WD   | I   |     |     | C     | C                 | C |
| B*51:01:03                                              | 51:01:03               | HLA01126  |                                               | 0           | 0            | 20            | 0            | 2            | 0           | 3            | 25            |                                                      |     | WD   |      |     |     |     | WD    | WD                |   |
| B*51:01:04                                              | 51:01:04               | HLA01149  |                                               | 1           | 2            | 27            | 0            | 0            | 0           | 1            | 31            |                                                      |     | WD   |      |     |     |     | WD    | WD                |   |

| Supplemental Table 9: HLA-B Allele Summary <sup>a</sup> |                        |           | Allele Count by Population Group <sup>b</sup> |            |             |            |            |             |            |            |             | 3.0.0 CIWD Category by Population Group <sup>c</sup> |          |          |          |          |          |          |          |                   |
|---------------------------------------------------------|------------------------|-----------|-----------------------------------------------|------------|-------------|------------|------------|-------------|------------|------------|-------------|------------------------------------------------------|----------|----------|----------|----------|----------|----------|----------|-------------------|
| Allele                                                  | Genomic typing         | Allele ID | G group                                       | AFA        | API         | EURO       | MENA       | HIS         | NAM        | UNK        | Total       | AFA                                                  | API      | EURO     | MENA     | HIS      | NAM      | UNK      | Total    | Highest Frequency |
| B*51:01:09                                              | 51:01:09               | HLA03273  |                                               | 0          | 30          | 0          | 0          | 0           | 0          | 6          | 36          |                                                      | I        |          |          |          |          | WD       | WD       | I                 |
| B*51:01:10                                              | 51:01:10               | HLA03797  |                                               | 0          | 0           | 8          | 0          | 0           | 0          | 1          | 9           |                                                      |          | WD       |          |          |          |          | WD       | WD                |
| B*51:01:12                                              | 51:01:12               | HLA04206  |                                               | 0          | 0           | 0          | 1          | 0           | 0          | 0          | 1           |                                                      |          |          |          |          |          |          |          |                   |
| B*51:01:13                                              | 51:01:13               | HLA04235  |                                               | 0          | 1           | 0          | 0          | 0           | 0          | 0          | 1           |                                                      |          |          |          |          |          |          |          |                   |
| B*51:01:14                                              | 51:01:14               | HLA04505  |                                               | 0          | 1           | 0          | 0          | 0           | 0          | 0          | 1           |                                                      |          |          |          |          |          |          |          |                   |
| B*51:01:15                                              | 51:01:15               | HLA04513  |                                               | 0          | 0           | 0          | 0          | 1           | 0          | 0          | 1           |                                                      |          |          |          |          |          |          |          |                   |
| B*51:01:19                                              | 51:01:19               | HLA05494  |                                               | 0          | 1           | 27         | 0          | 0           | 0          | 1          | 29          |                                                      |          | WD       |          |          |          |          | WD       | WD                |
| B*51:01:20                                              | 51:01:20               | HLA05715  |                                               | 0          | 1           | 0          | 2          | 0           | 0          | 2          | 5           |                                                      |          |          |          |          |          |          | WD       | WD                |
| B*51:01:21                                              | 51:01:21               | HLA05998  |                                               | 0          | 0           | 3          | 0          | 1           | 0          | 1          | 5           |                                                      |          |          |          |          |          |          | WD       | WD                |
| B*51:01:22                                              | 51:01:22               | HLA06023  |                                               | 0          | 0           | 1          | 0          | 0           | 0          | 0          | 1           |                                                      |          |          |          |          |          |          |          |                   |
| B*51:01:25                                              | 51:01:25               | HLA06288  |                                               | 0          | 0           | 3          | 0          | 0           | 0          | 0          | 3           |                                                      |          |          |          |          |          |          |          |                   |
| B*51:01:26                                              | 51:01:26               | HLA06364  |                                               | 0          | 0           | 1          | 0          | 1           | 0          | 1          | 3           |                                                      |          |          |          |          |          |          |          |                   |
| B*51:01:27                                              | 51:01:27               | HLA06936  |                                               | 0          | 0           | 1          | 0          | 0           | 0          | 0          | 1           |                                                      |          |          |          |          |          |          |          |                   |
| B*51:01:28                                              | 51:01:28               | HLA06979  |                                               | 0          | 0           | 3          | 1          | 0           | 0          | 0          | 4           |                                                      |          |          |          |          |          |          |          |                   |
| B*51:01:30                                              | 51:01:30               | HLA07203  |                                               | 0          | 0           | 1          | 0          | 0           | 0          | 0          | 1           |                                                      |          |          |          |          |          |          |          |                   |
| B*51:01:32                                              | 51:01:32               | HLA07655  |                                               | 0          | 0           | 3          | 0          | 1           | 0          | 1          | 5           |                                                      |          |          |          |          |          |          | WD       | WD                |
| B*51:01:33                                              | 51:01:33               | HLA07656  |                                               | 0          | 0           | 1          | 0          | 0           | 0          | 1          | 2           |                                                      |          |          |          |          |          |          |          |                   |
| B*51:01:34                                              | 51:01:34               | HLA07716  |                                               | 0          | 4           | 1          | 0          | 0           | 0          | 0          | 5           |                                                      |          |          |          |          |          |          | WD       | WD                |
| B*51:01:36                                              | 51:01:36               | HLA08525  |                                               | 0          | 0           | 0          | 0          | 0           | 0          | 2          | 2           |                                                      |          |          |          |          |          |          |          |                   |
| B*51:01:37                                              | 51:01:37               | HLA08575  |                                               | 0          | 3           | 0          | 0          | 0           | 0          | 0          | 3           |                                                      |          |          |          |          |          |          |          |                   |
| B*51:01:38                                              | 51:01:38               | HLA08680  |                                               | 3          | 0           | 0          | 0          | 0           | 0          | 1          | 4           |                                                      |          |          |          |          |          |          |          |                   |
| B*51:01:42                                              | 51:01:42               | HLA09584  |                                               | 0          | 0           | 1          | 0          | 0           | 0          | 0          | 1           |                                                      |          |          |          |          |          |          |          |                   |
| B*51:01:43                                              | 51:01:43               | HLA10120  |                                               | 0          | 1           | 1          | 0          | 0           | 0          | 0          | 2           |                                                      |          |          |          |          |          |          |          |                   |
| B*51:01:50                                              | 51:01:50               | HLA11834  |                                               | 0          | 1           | 0          | 0          | 0           | 0          | 0          | 1           |                                                      |          |          |          |          |          |          |          |                   |
| B*51:01:52                                              | 51:01:52               | HLA13009  |                                               | 0          | 1           | 0          | 0          | 0           | 0          | 0          | 1           |                                                      |          |          |          |          |          |          |          |                   |
| B*51:01:53                                              | 51:01:53               | HLA13011  |                                               | 0          | 0           | 1          | 0          | 0           | 0          | 0          | 1           |                                                      |          |          |          |          |          |          |          |                   |
| <b>B*51:02 total</b>                                    | <b>51:02 total</b>     |           |                                               | <b>331</b> | <b>3502</b> | <b>486</b> | <b>248</b> | <b>3017</b> | <b>274</b> | <b>994</b> | <b>8852</b> | <b>C</b>                                             | <b>C</b> | <b>I</b> | <b>C</b> | <b>C</b> | <b>C</b> | <b>C</b> | <b>C</b> | <b>C</b>          |
| B*51:02                                                 | 51:02                  |           |                                               | 20         | 182         | 44         | 6          | 348         | 33         | 57         | 690         | WD                                                   | C        | WD       | WD       | C        | C        | I        | I        | C                 |
| B*51:02P                                                | 51:02P                 |           |                                               | 0          | 3           | 2          | 0          | 0           | 0          | 0          | 5           |                                                      |          |          |          |          |          |          | WD       | WD                |
| <b>B*51:02:01G total</b>                                | <b>51:02:01G total</b> |           |                                               | <b>251</b> | <b>2674</b> | <b>391</b> | <b>230</b> | <b>2661</b> | <b>238</b> | <b>824</b> | <b>7269</b> | <b>C</b>                                             | <b>C</b> | <b>I</b> | <b>C</b> | <b>C</b> | <b>C</b> | <b>C</b> | <b>C</b> | <b>C</b>          |
| B*51:02:01G                                             | 51:02:01G              |           | 51:02:01G                                     | 4          | 276         | 20         | 4          | 55          | 4          | 39         | 402         |                                                      | C        | WD       |          | I        |          | I        | I        | C                 |

| Supplemental Table 9: HLA-B Allele Summary <sup>a</sup> |                    |           | Allele Count by Population Group <sup>b</sup> |            |             |              |             |             |            |             |              | 3.0.0 CIWD Category by Population Group <sup>c</sup> |          |           |           |          |          |          |          |                   |
|---------------------------------------------------------|--------------------|-----------|-----------------------------------------------|------------|-------------|--------------|-------------|-------------|------------|-------------|--------------|------------------------------------------------------|----------|-----------|-----------|----------|----------|----------|----------|-------------------|
| Allele                                                  | Genomic typing     | Allele ID | G group                                       | AFA        | API         | EURO         | MENA        | HIS         | NAM        | UNK         | Total        | AFA                                                  | API      | EURO      | MENA      | HIS      | NAM      | UNK      | Total    | Highest Frequency |
| B*51:02:01                                              | 51:02:01           |           | 51:02:01G                                     | 247        | 2398        | 371          | 226         | 2606        | 234        | 785         | 6867         | C                                                    | C        | I         | C         | C        | C        | C        | C        | C                 |
| B*51:02:02                                              | 51:02:02           | HLA00347  |                                               | 60         | 643         | 49           | 12          | 8           | 3          | 113         | 888          | C                                                    | C        | WD        | WD        | I        |          | I        | I        | C                 |
| B*51:03                                                 | 51:03              | HLA00348  |                                               | 0          | 0           | 2            | 0           | 0           | 0          | 0           | 2            |                                                      |          |           |           |          |          |          |          |                   |
| B*51:04                                                 | 51:04              | HLA00349  |                                               | 5          | 2           | 30           | 7           | 57          | 2          | 42          | 145          | WD                                                   |          | WD        | WD        | I        |          | I        | WD       | I                 |
| B*51:05                                                 | 51:05              | HLA00350  |                                               | 7          | 21          | 4369         | 795         | 71          | 4          | 326         | 5593         | WD                                                   | I        | C         | C         | C        |          | C        | C        | C                 |
| <b>B*51:06 total</b>                                    | <b>51:06 total</b> |           |                                               | <b>20</b>  | <b>9586</b> | <b>132</b>   | <b>38</b>   | <b>26</b>   | <b>18</b>  | <b>406</b>  | <b>10226</b> | <b>WD</b>                                            | <b>C</b> | <b>I</b>  | <b>WD</b> | <b>I</b> | <b>C</b> | <b>C</b> | <b>C</b> | <b>C</b>          |
| B*51:06                                                 | 51:06              |           |                                               | 3          | 509         | 6            | 1           | 2           | 0          | 18          | 539          |                                                      | C        | WD        |           |          |          | I        | I        | C                 |
| B*51:06P                                                | 51:06P             |           |                                               | 0          | 1           | 0            | 0           | 0           | 0          | 0           | 1            |                                                      |          |           |           |          |          |          |          |                   |
| B*51:06:01                                              | 51:06:01           | HLA00351  |                                               | 17         | 9076        | 100          | 37          | 24          | 18         | 388         | 9660         | WD                                                   | C        | WD        | WD        | I        | C        | C        | C        | C                 |
| B*51:06:02                                              | 51:06:02           | HLA06268  |                                               | 0          | 0           | 26           | 0           | 0           | 0          | 0           | 26           |                                                      |          | WD        |           |          |          |          | WD       | WD                |
| <b>B*51:07 total</b>                                    | <b>51:07 total</b> |           |                                               | <b>49</b>  | <b>1078</b> | <b>8067</b>  | <b>1269</b> | <b>484</b>  | <b>34</b>  | <b>1044</b> | <b>12025</b> | <b>C</b>                                             | <b>C</b> | <b>C</b>  | <b>C</b>  | <b>C</b> | <b>C</b> | <b>C</b> | <b>C</b> | <b>C</b>          |
| B*51:07                                                 | 51:07              |           |                                               | 2          | 53          | 626          | 107         | 75          | 4          | 64          | 931          |                                                      | I        | I         | C         | C        |          | I        | I        | C                 |
| B*51:07P                                                | 51:07P             |           |                                               | 0          | 0           | 2            | 0           | 0           | 0          | 0           | 2            |                                                      |          |           |           |          |          |          |          |                   |
| B*51:07:01                                              | 51:07:01           | HLA00352  |                                               | 47         | 1025        | 7439         | 1162        | 409         | 30         | 980         | 11092        | C                                                    | C        | C         | C         | C        | C        | C        | C        | C                 |
| <b>B*51:08 total</b>                                    | <b>51:08 total</b> |           |                                               | <b>228</b> | <b>752</b>  | <b>14658</b> | <b>2259</b> | <b>1118</b> | <b>150</b> | <b>3076</b> | <b>22241</b> | <b>C</b>                                             | <b>C</b> | <b>C</b>  | <b>C</b>  | <b>C</b> | <b>C</b> | <b>C</b> | <b>C</b> | <b>C</b>          |
| B*51:08                                                 | 51:08              |           |                                               | 72         | 137         | 5031         | 645         | 413         | 73         | 1022        | 7393         | C                                                    | C        | C         | C         | C        | C        | C        | C        | C                 |
| B*51:08P                                                | 51:08P             |           |                                               | 0          | 0           | 14           | 0           | 0           | 0          | 0           | 14           |                                                      |          | WD        |           |          |          |          | WD       | WD                |
| B*51:08:01                                              | 51:08:01           | HLA00353  |                                               | 156        | 615         | 9612         | 1614        | 705         | 77         | 2054        | 14833        | C                                                    | C        | C         | C         | C        | C        | C        | C        | C                 |
| B*51:08:02                                              | 51:08:02           | HLA11032  |                                               | 0          | 0           | 1            | 0           | 0           | 0          | 0           | 1            |                                                      |          |           |           |          |          |          |          |                   |
| <b>B*51:09 total</b>                                    | <b>51:09 total</b> |           |                                               | <b>220</b> | <b>57</b>   | <b>2234</b>  | <b>61</b>   | <b>97</b>   | <b>16</b>  | <b>315</b>  | <b>3000</b>  | <b>C</b>                                             | <b>I</b> | <b>C</b>  | <b>C</b>  | <b>C</b> | <b>C</b> | <b>C</b> | <b>C</b> | <b>C</b>          |
| B*51:09                                                 | 51:09              |           |                                               | 13         | 1           | 129          | 4           | 11          | 1          | 19          | 178          | WD                                                   |          | I         |           | I        |          | I        | I        | I                 |
| B*51:09:01                                              | 51:09:01           | HLA00354  |                                               | 207        | 56          | 2105         | 57          | 85          | 11         | 291         | 2812         | C                                                    | I        | C         | C         | C        | C        | C        | C        | C                 |
| B*51:09:02                                              | 51:09:02           | HLA03105  |                                               | 0          | 0           | 0            | 0           | 1           | 4          | 5           | 10           |                                                      |          |           |           |          |          | WD       | WD       | WD                |
| B*51:10                                                 | 51:10              | HLA00355  |                                               | 4          | 5           | 7            | 0           | 70          | 3          | 13          | 102          |                                                      | WD       | WD        |           | I        |          | WD       | WD       | I                 |
| B*51:12                                                 | 51:12              | HLA00357  |                                               | 0          | 0           | 1            | 0           | 0           | 0          | 0           | 1            |                                                      |          |           |           |          |          |          |          |                   |
| <b>B*51:13 total</b>                                    | <b>51:13 total</b> |           |                                               | <b>0</b>   | <b>3</b>    | <b>72</b>    | <b>1</b>    | <b>218</b>  | <b>16</b>  | <b>107</b>  | <b>417</b>   |                                                      |          | <b>WD</b> |           | <b>C</b> | <b>C</b> | <b>I</b> | <b>I</b> | <b>C</b>          |
| B*51:13                                                 | 51:13              |           |                                               | 0          | 1           | 24           | 0           | 46          | 2          | 25          | 98           |                                                      |          | WD        |           | I        |          | I        | WD       | I                 |
| B*51:13P                                                | 51:13P             |           |                                               | 0          | 0           | 1            | 0           | 0           | 0          | 0           | 1            |                                                      |          |           |           |          |          |          |          |                   |
| B*51:13:01                                              | 51:13:01           | HLA00358  |                                               | 0          | 2           | 46           | 0           | 123         | 8          | 75          | 254          |                                                      |          | WD        |           | C        | C        | I        | I        | C                 |
| B*51:13:02                                              | 51:13:02           | HLA01127  |                                               | 0          | 0           | 1            | 1           | 49          | 6          | 7           | 64           |                                                      |          |           |           | I        | WD       | WD       | WD       | I                 |
| B*51:14                                                 | 51:14              | HLA00359  |                                               | 6          | 1           | 55           | 0           | 280         | 21         | 97          | 460          | WD                                                   |          | WD        |           | C        | C        | I        | I        | C                 |

| Supplemental Table 9: HLA-B Allele Summary <sup>a</sup> |                    |           | Allele Count by Population Group <sup>b</sup> |          |          |           |          |          |          |          |           | 3.0.0 CIWD Category by Population Group <sup>c</sup> |     |           |      |     |     |     |           |                   |
|---------------------------------------------------------|--------------------|-----------|-----------------------------------------------|----------|----------|-----------|----------|----------|----------|----------|-----------|------------------------------------------------------|-----|-----------|------|-----|-----|-----|-----------|-------------------|
| Allele                                                  | Genomic typing     | Allele ID | G group                                       | AFA      | API      | EURO      | MENA     | HIS      | NAM      | UNK      | Total     | AFA                                                  | API | EURO      | MENA | HIS | NAM | UNK | Total     | Highest Frequency |
| B*51:16                                                 | 51:16              | HLA00361  |                                               | 0        | 0        | 1         | 0        | 0        | 0        | 0        | 1         |                                                      |     |           |      |     |     |     |           |                   |
| B*51:17                                                 | 51:17              | HLA01071  |                                               | 0        | 23       | 0         | 0        | 0        | 1        | 1        | 25        |                                                      | I   |           |      |     |     |     | WD        | I                 |
| B*51:18                                                 | 51:18              | HLA01072  |                                               | 0        | 0        | 1         | 0        | 0        | 0        | 0        | 1         |                                                      |     |           |      |     |     |     |           |                   |
| B*51:19                                                 | 51:19              | HLA01073  |                                               | 0        | 342      | 68        | 0        | 12       | 1        | 15       | 438       |                                                      | C   | WD        |      | I   |     | I   | I         | C                 |
| B*51:20                                                 | 51:20              | HLA01132  |                                               | 0        | 0        | 38        | 0        | 2        | 0        | 2        | 42        |                                                      |     | WD        |      |     |     |     | WD        | WD                |
| B*51:21                                                 | 51:21              | HLA01134  |                                               | 0        | 1        | 13        | 3        | 0        | 0        | 0        | 17        |                                                      |     | WD        |      |     |     |     | WD        | WD                |
| B*51:22                                                 | 51:22              | HLA01243  |                                               | 3        | 5        | 257       | 1        | 107      | 9        | 26       | 408       |                                                      | WD  | I         |      | C   | C   | I   | I         | C                 |
| B*51:23                                                 | 51:23              | HLA01245  |                                               | 1        | 3        | 1         | 1        | 10       | 1        | 5        | 22        |                                                      |     |           |      | I   |     | WD  | WD        | I                 |
| <b>B*51:24 total</b>                                    | <b>51:24 total</b> |           |                                               | <b>0</b> | <b>0</b> | <b>21</b> | <b>1</b> | <b>0</b> | <b>0</b> | <b>0</b> | <b>22</b> |                                                      |     | <b>WD</b> |      |     |     |     | <b>WD</b> | <b>WD</b>         |
| B*51:24                                                 | 51:24              |           |                                               | 0        | 0        | 3         | 0        | 0        | 0        | 0        | 3         |                                                      |     |           |      |     |     |     |           |                   |
| B*51:24:03                                              | 51:24:03           | HLA04518  |                                               | 0        | 0        | 4         | 0        | 0        | 0        | 0        | 4         |                                                      |     |           |      |     |     |     |           |                   |
| B*51:24:04                                              | 51:24:04           | HLA05723  |                                               | 0        | 0        | 7         | 1        | 0        | 0        | 0        | 8         |                                                      |     | WD        |      |     |     |     | WD        | WD                |
| B*51:24:05                                              | 51:24:05           | HLA10043  |                                               | 0        | 0        | 7         | 0        | 0        | 0        | 0        | 7         |                                                      |     | WD        |      |     |     |     | WD        | WD                |
| B*51:26                                                 | 51:26              | HLA01417  |                                               | 0        | 0        | 38        | 0        | 1        | 0        | 2        | 41        |                                                      |     | WD        |      |     |     |     | WD        | WD                |
| B*51:27N                                                | 51:27N             | HLA01474  |                                               | 0        | 0        | 1         | 0        | 0        | 0        | 0        | 1         |                                                      |     |           |      |     |     |     |           |                   |
| B*51:29                                                 | 51:29              | HLA01568  |                                               | 0        | 0        | 25        | 8        | 2        | 0        | 3        | 38        |                                                      |     | WD        | WD   |     |     |     | WD        | WD                |
| B*51:31                                                 | 51:31              | HLA01626  |                                               | 1        | 1        | 10        | 0        | 29       | 2        | 14       | 57        |                                                      |     | WD        |      | I   |     | I   | WD        | I                 |
| B*51:33                                                 | 51:33              | HLA01676  |                                               | 0        | 0        | 4         | 1        | 0        | 0        | 0        | 5         |                                                      |     |           |      |     |     |     | WD        | WD                |
| B*51:34                                                 | 51:34              | HLA01678  |                                               | 1        | 30       | 20        | 11       | 0        | 0        | 5        | 67        |                                                      | I   | WD        | WD   |     |     | WD  | WD        | I                 |
| B*51:36                                                 | 51:36              | HLA02003  |                                               | 0        | 7        | 0         | 0        | 0        | 0        | 1        | 8         |                                                      | WD  |           |      |     |     |     | WD        | WD                |
| B*51:37                                                 | 51:37              | HLA02020  |                                               | 0        | 1        | 3         | 0        | 0        | 0        | 9        | 13        |                                                      |     |           |      |     |     | WD  | WD        | WD                |
| B*51:38                                                 | 51:38              | HLA02167  |                                               | 0        | 0        | 48        | 0        | 0        | 0        | 1        | 49        |                                                      |     | WD        |      |     |     |     | WD        | WD                |
| B*51:39                                                 | 51:39              | HLA02297  |                                               | 0        | 6        | 0         | 0        | 1        | 0        | 0        | 7         |                                                      | WD  |           |      |     |     |     | WD        | WD                |
| B*51:40                                                 | 51:40              | HLA02419  |                                               | 0        | 0        | 14        | 0        | 0        | 0        | 4        | 18        |                                                      |     | WD        |      |     |     |     | WD        | WD                |
| B*51:42                                                 | 51:42              | HLA02558  |                                               | 0        | 0        | 2         | 0        | 0        | 0        | 0        | 2         |                                                      |     |           |      |     |     |     |           |                   |
| B*51:43                                                 | 51:43              | HLA02620  |                                               | 0        | 0        | 108       | 0        | 1        | 0        | 64       | 173       |                                                      |     | WD        |      |     |     | I   | I         | I                 |
| B*51:44N                                                | 51:44N             | HLA02667  |                                               | 0        | 0        | 4         | 0        | 0        | 0        | 0        | 4         |                                                      |     |           |      |     |     |     |           |                   |
| B*51:46                                                 | 51:46              | HLA02754  |                                               | 0        | 0        | 18        | 0        | 0        | 0        | 0        | 18        |                                                      |     | WD        |      |     |     |     | WD        | WD                |
| B*51:49                                                 | 51:49              | HLA02933  |                                               | 0        | 0        | 47        | 1        | 0        | 0        | 25       | 73        |                                                      |     | WD        |      |     |     | I   | WD        | I                 |
| B*51:50                                                 | 51:50              | HLA03099  |                                               | 0        | 0        | 143       | 0        | 1        | 0        | 2        | 146       |                                                      |     | I         |      |     |     |     | WD        | I                 |
| B*51:53                                                 | 51:53              | HLA03277  |                                               | 1        | 0        | 0         | 0        | 0        | 0        | 0        | 1         |                                                      |     |           |      |     |     |     |           |                   |

| Supplemental Table 9: HLA-B Allele Summary <sup>a</sup> |                    |           | Allele Count by Population Group <sup>b</sup> |          |          |           |          |          |          |          |           | 3.0.0 CIWD Category by Population Group <sup>c</sup> |     |           |      |     |     |     |           |                   |
|---------------------------------------------------------|--------------------|-----------|-----------------------------------------------|----------|----------|-----------|----------|----------|----------|----------|-----------|------------------------------------------------------|-----|-----------|------|-----|-----|-----|-----------|-------------------|
| Allele                                                  | Genomic typing     | Allele ID | G group                                       | AFA      | API      | EURO      | MENA     | HIS      | NAM      | UNK      | Total     | AFA                                                  | API | EURO      | MENA | HIS | NAM | UNK | Total     | Highest Frequency |
| B*51:54                                                 | 51:54              | HLA03279  |                                               | 0        | 0        | 0         | 1        | 0        | 0        | 0        | 1         |                                                      |     |           |      |     |     |     |           |                   |
| B*51:55                                                 | 51:55              | HLA03282  |                                               | 0        | 0        | 10        | 0        | 1        | 0        | 2        | 13        |                                                      |     | WD        |      |     |     |     | WD        | WD                |
| <b>B*51:56 total</b>                                    | <b>51:56 total</b> |           |                                               | <b>0</b> | <b>0</b> | <b>33</b> | <b>0</b> | <b>0</b> | <b>0</b> | <b>4</b> | <b>37</b> |                                                      |     | <b>WD</b> |      |     |     |     | <b>WD</b> | <b>WD</b>         |
| B*51:56                                                 | 51:56              |           |                                               | 0        | 0        | 2         | 0        | 0        | 0        | 0        | 2         |                                                      |     |           |      |     |     |     |           |                   |
| B*51:56:01                                              | 51:56:01           | HLA03313  |                                               | 0        | 0        | 12        | 0        | 0        | 0        | 4        | 16        |                                                      |     | WD        |      |     |     |     | WD        | WD                |
| B*51:56:02                                              | 51:56:02           | HLA05999  |                                               | 0        | 0        | 18        | 0        | 0        | 0        | 0        | 18        |                                                      |     | WD        |      |     |     |     | WD        | WD                |
| B*51:56:03                                              | 51:56:03           | HLA13344  |                                               | 0        | 0        | 1         | 0        | 0        | 0        | 0        | 1         |                                                      |     |           |      |     |     |     |           |                   |
| B*51:57                                                 | 51:57              | HLA03355  |                                               | 0        | 0        | 2         | 0        | 0        | 0        | 1        | 3         |                                                      |     |           |      |     |     |     |           |                   |
| B*51:58                                                 | 51:58              | HLA03456  |                                               | 0        | 1        | 0         | 0        | 0        | 0        | 0        | 1         |                                                      |     |           |      |     |     |     |           |                   |
| B*51:60                                                 | 51:60              | HLA03465  |                                               | 0        | 0        | 2         | 0        | 0        | 0        | 0        | 2         |                                                      |     |           |      |     |     |     |           |                   |
| <b>B*51:61 total</b>                                    | <b>51:61 total</b> |           |                                               | <b>0</b> | <b>0</b> | <b>35</b> | <b>1</b> | <b>0</b> | <b>0</b> | <b>1</b> | <b>37</b> |                                                      |     | <b>WD</b> |      |     |     |     | <b>WD</b> | <b>WD</b>         |
| B*51:61                                                 | 51:61              |           |                                               | 0        | 0        | 7         | 1        | 0        | 0        | 0        | 8         |                                                      |     | WD        |      |     |     |     | WD        | WD                |
| B*51:61:01                                              | 51:61:01           | HLA03468  |                                               | 0        | 0        | 26        | 0        | 0        | 0        | 1        | 27        |                                                      |     | WD        |      |     |     |     | WD        | WD                |
| B*51:61:02                                              | 51:61:02           | HLA08107  |                                               | 0        | 0        | 2         | 0        | 0        | 0        | 0        | 2         |                                                      |     |           |      |     |     |     |           |                   |
| <b>B*51:63 total</b>                                    | <b>51:63 total</b> |           |                                               | <b>0</b> | <b>0</b> | <b>3</b>  | <b>0</b> | <b>0</b> | <b>0</b> | <b>0</b> | <b>3</b>  |                                                      |     |           |      |     |     |     |           |                   |
| B*51:63                                                 | 51:63              |           |                                               | 0        | 0        | 3         | 0        | 0        | 0        | 0        | 3         |                                                      |     |           |      |     |     |     |           |                   |
| B*51:64                                                 | 51:64              | HLA03608  |                                               | 11       | 0        | 4         | 0        | 0        | 0        | 0        | 15        | WD                                                   |     |           |      |     |     |     | WD        | WD                |
| B*51:65                                                 | 51:65              | HLA03617  |                                               | 1        | 0        | 89        | 5        | 12       | 0        | 6        | 113       |                                                      |     | WD        | WD   | I   |     | WD  | WD        | I                 |
| B*51:66                                                 | 51:66              | HLA03665  |                                               | 0        | 0        | 3         | 0        | 0        | 0        | 0        | 3         |                                                      |     |           |      |     |     |     |           |                   |
| B*51:67                                                 | 51:67              | HLA03674  |                                               | 0        | 0        | 8         | 0        | 0        | 0        | 0        | 8         |                                                      |     | WD        |      |     |     |     | WD        | WD                |
| B*51:68                                                 | 51:68              | HLA03676  |                                               | 0        | 0        | 37        | 0        | 0        | 0        | 0        | 37        |                                                      |     | WD        |      |     |     |     | WD        | WD                |
| B*51:69                                                 | 51:69              | HLA03716  |                                               | 0        | 1        | 5         | 31       | 0        | 0        | 2        | 39        |                                                      |     | WD        | WD   |     |     |     | WD        | WD                |
| B*51:70                                                 | 51:70              | HLA03719  |                                               | 0        | 0        | 1         | 8        | 0        | 0        | 0        | 9         |                                                      |     |           | WD   |     |     |     | WD        | WD                |
| B*51:71                                                 | 51:71              | HLA03901  |                                               | 0        | 0        | 5         | 0        | 0        | 0        | 0        | 5         |                                                      |     | WD        |      |     |     |     | WD        | WD                |
| B*51:72                                                 | 51:72              | HLA03971  |                                               | 0        | 0        | 1         | 0        | 0        | 0        | 0        | 1         |                                                      |     |           |      |     |     |     |           |                   |
| B*51:73                                                 | 51:73              | HLA03972  |                                               | 0        | 0        | 5         | 0        | 0        | 0        | 0        | 5         |                                                      |     | WD        |      |     |     |     | WD        | WD                |
| B*51:74                                                 | 51:74              | HLA04045  |                                               | 0        | 0        | 2         | 7        | 0        | 0        | 0        | 9         |                                                      |     |           | WD   |     |     |     | WD        | WD                |
| B*51:75                                                 | 51:75              | HLA04080  |                                               | 0        | 0        | 26        | 0        | 35       | 0        | 12       | 73        |                                                      |     | WD        |      | I   |     | WD  | WD        | I                 |
| B*51:76                                                 | 51:76              | HLA04102  |                                               | 0        | 0        | 6         | 0        | 0        | 0        | 0        | 6         |                                                      |     | WD        |      |     |     |     | WD        | WD                |
| <b>B*51:78 total</b>                                    | <b>51:78 total</b> |           |                                               | <b>0</b> | <b>1</b> | <b>1</b>  | <b>0</b> | <b>0</b> | <b>0</b> | <b>0</b> | <b>2</b>  |                                                      |     |           |      |     |     |     |           |                   |
| B*51:78:01                                              | 51:78:01           | HLA04015  |                                               | 0        | 1        | 1         | 0        | 0        | 0        | 0        | 2         |                                                      |     |           |      |     |     |     |           |                   |

| Supplemental Table 9: HLA-B Allele Summary <sup>a</sup> |                     |           | Allele Count by Population Group <sup>b</sup> |          |          |          |          |          |          |          |          | 3.0.0 CIWD Category by Population Group <sup>c</sup> |     |      |      |     |     |     |       |                   |
|---------------------------------------------------------|---------------------|-----------|-----------------------------------------------|----------|----------|----------|----------|----------|----------|----------|----------|------------------------------------------------------|-----|------|------|-----|-----|-----|-------|-------------------|
| Allele                                                  | Genomic typing      | Allele ID | G group                                       | AFA      | API      | EURO     | MENA     | HIS      | NAM      | UNK      | Total    | AFA                                                  | API | EURO | MENA | HIS | NAM | UNK | Total | Highest Frequency |
| B*51:79                                                 | 51:79               | HLA04199  |                                               | 0        | 0        | 18       | 0        | 0        | 0        | 2        | 20       |                                                      |     | WD   |      |     |     |     | WD    | WD                |
| B*51:80                                                 | 51:80               | HLA04204  |                                               | 0        | 0        | 3        | 0        | 0        | 0        | 0        | 3        |                                                      |     |      |      |     |     |     |       |                   |
| B*51:81                                                 | 51:81               | HLA04225  |                                               | 0        | 0        | 0        | 0        | 1        | 0        | 1        | 2        |                                                      |     |      |      |     |     |     |       |                   |
| B*51:82                                                 | 51:82               | HLA04231  |                                               | 0        | 0        | 9        | 0        | 0        | 0        | 0        | 9        |                                                      |     | WD   |      |     |     |     | WD    | WD                |
| B*51:83                                                 | 51:83               | HLA04251  |                                               | 1        | 1        | 6        | 21       | 0        | 0        | 0        | 29       |                                                      |     | WD   | WD   |     |     |     | WD    | WD                |
| B*51:84                                                 | 51:84               | HLA04166  |                                               | 0        | 1        | 0        | 0        | 0        | 0        | 0        | 1        |                                                      |     |      |      |     |     |     |       |                   |
| B*51:85                                                 | 51:85               | HLA04441  |                                               | 0        | 0        | 3        | 0        | 0        | 0        | 0        | 3        |                                                      |     |      |      |     |     |     |       |                   |
| B*51:86                                                 | 51:86               | HLA04444  |                                               | 0        | 3        | 0        | 0        | 0        | 0        | 0        | 3        |                                                      |     |      |      |     |     |     |       |                   |
| B*51:87                                                 | 51:87               | HLA04495  |                                               | 1        | 0        | 5        | 0        | 0        | 0        | 0        | 6        |                                                      |     | WD   |      |     |     |     | WD    | WD                |
| B*51:89                                                 | 51:89               | HLA04649  |                                               | 0        | 0        | 2        | 0        | 0        | 0        | 0        | 2        |                                                      |     |      |      |     |     |     |       |                   |
| B*51:90                                                 | 51:90               | HLA04704  |                                               | 0        | 0        | 2        | 0        | 0        | 0        | 0        | 2        |                                                      |     |      |      |     |     |     |       |                   |
| B*51:91                                                 | 51:91               | HLA04705  |                                               | 0        | 0        | 0        | 0        | 1        | 0        | 0        | 1        |                                                      |     |      |      |     |     |     |       |                   |
| B*51:93                                                 | 51:93               | HLA04716  |                                               | 0        | 2        | 0        | 0        | 0        | 0        | 1        | 3        |                                                      |     |      |      |     |     |     |       |                   |
| B*51:94                                                 | 51:94               | HLA04718  |                                               | 0        | 0        | 1        | 0        | 0        | 0        | 2        | 3        |                                                      |     |      |      |     |     |     |       |                   |
| B*51:95                                                 | 51:95               | HLA04791  |                                               | 0        | 0        | 0        | 3        | 0        | 0        | 1        | 4        |                                                      |     |      |      |     |     |     |       |                   |
| B*51:97                                                 | 51:97               | HLA05464  |                                               | 0        | 0        | 1        | 0        | 0        | 0        | 0        | 1        |                                                      |     |      |      |     |     |     |       |                   |
| B*51:98N                                                | 51:98N              | HLA05468  |                                               | 0        | 0        | 2        | 0        | 0        | 0        | 0        | 2        |                                                      |     |      |      |     |     |     |       |                   |
| B*51:100                                                | 51:100              | HLA05495  |                                               | 0        | 0        | 5        | 0        | 0        | 0        | 0        | 5        |                                                      |     | WD   |      |     |     |     | WD    | WD                |
| B*51:105                                                | 51:105              | HLA05836  |                                               | 0        | 0        | 19       | 0        | 0        | 0        | 1        | 20       |                                                      |     | WD   |      |     |     |     | WD    | WD                |
| <b>B*51:106 total</b>                                   | <b>51:106 total</b> |           |                                               | <b>0</b> | <b>0</b> | <b>1</b> | <b>0</b> | <b>0</b> | <b>0</b> | <b>0</b> | <b>1</b> |                                                      |     |      |      |     |     |     |       |                   |
| B*51:106                                                | 51:106              |           |                                               | 0        | 0        | 1        | 0        | 0        | 0        | 0        | 1        |                                                      |     |      |      |     |     |     |       |                   |
| B*51:107                                                | 51:107              | HLA05959  |                                               | 0        | 5        | 6        | 0        | 0        | 0        | 0        | 11       |                                                      | WD  | WD   |      |     |     |     | WD    | WD                |
| B*51:109                                                | 51:109              | HLA06270  |                                               | 0        | 12       | 0        | 0        | 0        | 0        | 0        | 12       |                                                      | WD  |      |      |     |     |     | WD    | WD                |
| B*51:112                                                | 51:112              | HLA06369  |                                               | 0        | 0        | 1        | 0        | 0        | 0        | 0        | 1        |                                                      |     |      |      |     |     |     |       |                   |
| B*51:114                                                | 51:114              | HLA06675  |                                               | 0        | 0        | 5        | 0        | 2        | 0        | 2        | 9        |                                                      |     | WD   |      |     |     |     | WD    | WD                |
| B*51:115                                                | 51:115              | HLA06676  |                                               | 0        | 0        | 3        | 1        | 0        | 0        | 0        | 4        |                                                      |     |      |      |     |     |     |       |                   |
| B*51:116                                                | 51:116              | HLA06698  |                                               | 0        | 0        | 5        | 0        | 0        | 0        | 0        | 5        |                                                      |     | WD   |      |     |     |     | WD    | WD                |
| B*51:117                                                | 51:117              | HLA06701  |                                               | 0        | 0        | 12       | 0        | 0        | 0        | 1        | 13       |                                                      |     | WD   |      |     |     |     | WD    | WD                |
| B*51:119                                                | 51:119              | HLA06959  |                                               | 0        | 0        | 1        | 0        | 0        | 0        | 0        | 1        |                                                      |     |      |      |     |     |     |       |                   |
| B*51:120                                                | 51:120              | HLA06969  |                                               | 0        | 0        | 2        | 0        | 0        | 0        | 0        | 2        |                                                      |     |      |      |     |     |     |       |                   |
| B*51:122                                                | 51:122              | HLA07002  |                                               | 0        | 0        | 6        | 0        | 0        | 0        | 0        | 6        |                                                      |     | WD   |      |     |     |     | WD    | WD                |



| Supplemental Table 9: HLA-B Allele Summary <sup>a</sup> |                     |           | Allele Count by Population Group <sup>b</sup> |          |           |          |          |          |          |          |           | 3.0.0 CIWD Category by Population Group <sup>c</sup> |           |      |      |     |     |           |          |                   |
|---------------------------------------------------------|---------------------|-----------|-----------------------------------------------|----------|-----------|----------|----------|----------|----------|----------|-----------|------------------------------------------------------|-----------|------|------|-----|-----|-----------|----------|-------------------|
| Allele                                                  | Genomic typing      | Allele ID | G group                                       | AFA      | API       | EURO     | MENA     | HIS      | NAM      | UNK      | Total     | AFA                                                  | API       | EURO | MENA | HIS | NAM | UNK       | Total    | Highest Frequency |
| B*51:123                                                | 51:123              | HLA07180  |                                               | 0        | 0         | 0        | 0        | 7        | 1        | 1        | 9         |                                                      |           |      |      | WD  |     |           | WD       | WD                |
| B*51:124                                                | 51:124              | HLA07181  |                                               | 0        | 1         | 0        | 0        | 0        | 0        | 0        | 1         |                                                      |           |      |      |     |     |           |          |                   |
| B*51:127                                                | 51:127              | HLA07461  |                                               | 3        | 0         | 0        | 0        | 2        | 0        | 2        | 7         |                                                      |           |      |      |     |     |           | WD       | WD                |
| B*51:131                                                | 51:131              | HLA07715  |                                               | 0        | 0         | 1        | 0        | 0        | 0        | 0        | 1         |                                                      |           |      |      |     |     |           |          |                   |
| B*51:134                                                | 51:134              | HLA08076  |                                               | 0        | 0         | 14       | 0        | 0        | 0        | 0        | 14        |                                                      |           | WD   |      |     |     |           | WD       | WD                |
| B*51:135                                                | 51:135              | HLA08077  |                                               | 0        | 1         | 0        | 0        | 0        | 0        | 0        | 1         |                                                      |           |      |      |     |     |           |          |                   |
| B*51:136                                                | 51:136              | HLA08078  |                                               | 0        | 0         | 4        | 0        | 0        | 0        | 0        | 4         |                                                      |           |      |      |     |     |           |          |                   |
| B*51:137                                                | 51:137              | HLA08130  |                                               | 0        | 1         | 0        | 0        | 0        | 0        | 0        | 1         |                                                      |           |      |      |     |     |           |          |                   |
| B*51:139                                                | 51:139              | HLA08375  |                                               | 2        | 0         | 0        | 0        | 0        | 0        | 0        | 2         |                                                      |           |      |      |     |     |           |          |                   |
| B*51:141                                                | 51:141              | HLA08391  |                                               | 0        | 0         | 3        | 0        | 0        | 0        | 0        | 3         |                                                      |           |      |      |     |     |           |          |                   |
| B*51:143                                                | 51:143              | HLA08436  |                                               | 0        | 0         | 1        | 0        | 0        | 0        | 0        | 1         |                                                      |           |      |      |     |     |           |          |                   |
| B*51:145                                                | 51:145              | HLA08653  |                                               | 0        | 0         | 2        | 0        | 0        | 0        | 0        | 2         |                                                      |           |      |      |     |     |           |          |                   |
| B*51:146                                                | 51:146              | HLA08681  |                                               | 0        | 0         | 0        | 1        | 0        | 0        | 2        | 3         |                                                      |           |      |      |     |     |           |          |                   |
| B*51:147                                                | 51:147              | HLA08682  |                                               | 0        | 0         | 3        | 0        | 0        | 0        | 0        | 3         |                                                      |           |      |      |     |     |           |          |                   |
| B*51:148                                                | 51:148              | HLA08780  |                                               | 1        | 0         | 0        | 0        | 0        | 0        | 0        | 1         |                                                      |           |      |      |     |     |           |          |                   |
| B*51:150                                                | 51:150              | HLA09001  |                                               | 0        | 0         | 2        | 0        | 0        | 0        | 0        | 2         |                                                      |           |      |      |     |     |           |          |                   |
| B*51:152                                                | 51:152              | HLA09441  |                                               | 0        | 0         | 3        | 0        | 0        | 0        | 0        | 3         |                                                      |           |      |      |     |     |           |          |                   |
| B*51:153                                                | 51:153              | HLA09489  |                                               | 0        | 2         | 0        | 0        | 0        | 0        | 0        | 2         |                                                      |           |      |      |     |     |           |          |                   |
| B*51:154                                                | 51:154              | HLA09582  |                                               | 0        | 1         | 0        | 0        | 0        | 0        | 0        | 1         |                                                      |           |      |      |     |     |           |          |                   |
| <b>B*51:158 total</b>                                   | <b>51:158 total</b> |           |                                               | <b>0</b> | <b>13</b> | <b>8</b> | <b>0</b> | <b>0</b> | <b>0</b> | <b>0</b> | <b>21</b> | <b>I</b>                                             | <b>WD</b> |      |      |     |     | <b>WD</b> | <b>I</b> |                   |
| B*51:158                                                | 51:158              |           |                                               | 0        | 1         | 0        | 0        | 0        | 0        | 0        | 1         |                                                      |           |      |      |     |     |           |          |                   |
| B*51:158:01                                             | 51:158:01           | HLA10517  |                                               | 0        | 12        | 0        | 0        | 0        | 0        | 0        | 12        | WD                                                   |           |      |      |     |     |           | WD       | WD                |
| B*51:158:02                                             | 51:158:02           | HLA11833  |                                               | 0        | 0         | 8        | 0        | 0        | 0        | 0        | 8         |                                                      |           | WD   |      |     |     |           | WD       | WD                |
| B*51:162                                                | 51:162              | HLA10759  |                                               | 0        | 0         | 0        | 0        | 0        | 0        | 1        | 1         |                                                      |           |      |      |     |     |           |          |                   |
| B*51:167                                                | 51:167              | HLA10991  |                                               | 0        | 0         | 1        | 0        | 0        | 0        | 0        | 1         |                                                      |           |      |      |     |     |           |          |                   |
| B*51:168                                                | 51:168              | HLA11031  |                                               | 0        | 0         | 0        | 0        | 3        | 1        | 0        | 4         |                                                      |           |      |      |     |     |           |          |                   |
| B*51:171                                                | 51:171              | HLA11433  |                                               | 0        | 0         | 0        | 0        | 0        | 0        | 1        | 1         |                                                      |           |      |      |     |     |           |          |                   |
| B*51:173Q                                               | 51:173Q             | HLA11480  |                                               | 0        | 0         | 1        | 0        | 0        | 0        | 0        | 1         |                                                      |           |      |      |     |     |           |          |                   |
| <b>B*51:174 total</b>                                   | <b>51:174 total</b> |           |                                               | <b>0</b> | <b>0</b>  | <b>1</b> | <b>0</b> | <b>0</b> | <b>0</b> | <b>0</b> | <b>1</b>  |                                                      |           |      |      |     |     |           |          |                   |
| B*51:174                                                | 51:174              |           |                                               | 0        | 0         | 1        | 0        | 0        | 0        | 0        | 1         |                                                      |           |      |      |     |     |           |          |                   |
| B*51:177                                                | 51:177              | HLA11835  |                                               | 0        | 0         | 5        | 0        | 0        | 0        | 0        | 5         |                                                      |           | WD   |      |     |     |           | WD       | WD                |

| Supplemental Table 9: HLA-B Allele Summary <sup>a</sup> |                        |           | Allele Count by Population Group <sup>b</sup> |             |              |               |              |              |             |              |               | 3.0.0 CIWD Category by Population Group <sup>c</sup> |          |          |          |          |          |          |          |                   |          |
|---------------------------------------------------------|------------------------|-----------|-----------------------------------------------|-------------|--------------|---------------|--------------|--------------|-------------|--------------|---------------|------------------------------------------------------|----------|----------|----------|----------|----------|----------|----------|-------------------|----------|
| Allele                                                  | Genomic typing         | Allele ID | G group                                       | AFA         | API          | EURO          | MENA         | HIS          | NAM         | UNK          | Total         | AFA                                                  | API      | EURO     | MENA     | HIS      | NAM      | UNK      | Total    | Highest Frequency |          |
| B*51:178N                                               | 51:178N                | HLA12015  |                                               | 0           | 0            | 1             | 0            | 0            | 0           | 0            | 1             |                                                      |          |          |          |          |          |          |          |                   |          |
| B*51:179                                                | 51:179                 | HLA11949  |                                               | 0           | 0            | 4             | 0            | 0            | 0           | 0            | 4             |                                                      |          |          |          |          |          |          |          |                   |          |
| B*51:181                                                | 51:181                 | HLA12301  |                                               | 0           | 0            | 2             | 0            | 0            | 0           | 0            | 2             |                                                      |          |          |          |          |          |          |          |                   |          |
| B*51:185                                                | 51:185                 | HLA12606  |                                               | 0           | 0            | 2             | 0            | 0            | 0           | 0            | 2             |                                                      |          |          |          |          |          |          |          |                   |          |
| B*51:187                                                | 51:187                 | HLA13027  |                                               | 0           | 0            | 2             | 0            | 0            | 0           | 0            | 2             |                                                      |          |          |          |          |          |          |          |                   |          |
| B*51:188                                                | 51:188                 | HLA13338  |                                               | 0           | 0            | 1             | 0            | 0            | 0           | 0            | 1             |                                                      |          |          |          |          |          |          |          |                   |          |
| B*51:191                                                | 51:191                 | HLA14017  |                                               | 0           | 3            | 0             | 0            | 0            | 0           | 0            | 3             |                                                      |          |          |          |          |          |          |          |                   |          |
| B*51:194                                                | 51:194                 | HLA14155  |                                               | 0           | 1            | 0             | 0            | 0            | 0           | 0            | 1             |                                                      |          |          |          |          |          |          |          |                   |          |
| B*51:203                                                | 51:203                 | HLA15034  |                                               | 0           | 0            | 1             | 0            | 0            | 0           | 0            | 1             |                                                      |          |          |          |          |          |          |          |                   |          |
| B*51:204                                                | 51:204                 | HLA14987  |                                               | 0           | 0            | 0             | 0            | 0            | 0           | 1            | 1             |                                                      |          |          |          |          |          |          |          |                   |          |
| B*51:206                                                | 51:206                 | HLA14989  |                                               | 0           | 0            | 0             | 0            | 0            | 0           | 1            | 1             |                                                      |          |          |          |          |          |          |          |                   |          |
| B*51:208                                                | 51:208                 | HLA15392  |                                               | 0           | 0            | 2             | 0            | 0            | 0           | 1            | 3             |                                                      |          |          |          |          |          |          |          |                   |          |
| B*51:210                                                | 51:210                 | HLA15739  |                                               | 0           | 0            | 1             | 0            | 0            | 0           | 0            | 1             |                                                      |          |          |          |          |          |          |          |                   |          |
| B*51:213                                                | 51:213                 | HLA15972  |                                               | 0           | 0            | 1             | 0            | 0            | 0           | 1            | 2             |                                                      |          |          |          |          |          |          |          |                   |          |
| B*51:221                                                | 51:221                 | HLA16877  |                                               | 0           | 1            | 0             | 0            | 0            | 0           | 0            | 1             |                                                      |          |          |          |          |          |          |          |                   |          |
| B*51:CODE                                               | 51:CODE                |           |                                               | 558         | 1553         | 29623         | 833          | 3209         | 218         | 4515         | 40509         | NA                                                   | NA       | NA       | NA       | NA       | NA       | NA       | NA       | NA                | NA       |
| <b>B*52:01 total</b>                                    | <b>52:01 total</b>     |           |                                               | <b>6378</b> | <b>78865</b> | <b>124392</b> | <b>14417</b> | <b>15809</b> | <b>1476</b> | <b>26082</b> | <b>267419</b> | <b>C</b>                                             | <b>C</b> | <b>C</b> | <b>C</b> | <b>C</b> | <b>C</b> | <b>C</b> | <b>C</b> | <b>C</b>          | <b>C</b> |
| B*52:01                                                 | 52:01                  |           |                                               | 345         | 18           | 1069          | 22           | 947          | 59          | 285          | 2745          | C                                                    | I        | I        | WD       | C        | C        | C        | C        | C                 | C        |
| B*52:01P                                                | 52:01P                 |           |                                               | 0           | 3            | 297           | 0            | 1            | 0           | 2            | 303           |                                                      |          | I        |          |          |          |          | I        | I                 |          |
| <b>B*52:01:01G total</b>                                | <b>52:01:01G total</b> |           |                                               | <b>1015</b> | <b>78411</b> | <b>120920</b> | <b>14014</b> | <b>7093</b>  | <b>747</b>  | <b>23004</b> | <b>245204</b> | <b>C</b>                                             | <b>C</b> | <b>C</b> | <b>C</b> | <b>C</b> | <b>C</b> | <b>C</b> | <b>C</b> | <b>C</b>          | <b>C</b> |
| B*52:01:01G                                             | 52:01:01G              |           | 52:01:01G                                     | 825         | 73397        | 115473        | 13447        | 4987         | 534         | 21321        | 229984        | C                                                    | C        | C        | C        | C        | C        | C        | C        | C                 | C        |
| B*52:01:01                                              | 52:01:01               |           | 52:01:01G                                     | 189         | 5012         | 5374          | 567          | 2103         | 211         | 1680         | 15136         | C                                                    | C        | C        | C        | C        | C        | C        | C        | C                 | C        |
| B*52:01:01:01                                           | 52:01:01:01            | HLA00362  | 52:01:01G                                     | 0           | 0            | 3             | 0            | 0            | 0           | 0            | 3             |                                                      |          |          |          |          |          |          |          |                   |          |
| B*52:01:01:02                                           | 52:01:01:02            | HLA05917  | 52:01:01G                                     | 0           | 0            | 61            | 0            | 0            | 0           | 0            | 61            |                                                      |          | WD       |          |          |          |          | WD       | WD                |          |
| B*52:01:01:03                                           | 52:01:01:03            | HLA10677  | 52:01:01G                                     | 1           | 1            | 9             | 0            | 3            | 2           | 3            | 19            |                                                      |          | WD       |          |          |          |          | WD       | WD                |          |
| B*52:01:08                                              | 52:01:08               | HLA06159  | 52:01:01G                                     | 0           | 1            | 0             | 0            | 0            | 0           | 0            | 1             |                                                      |          |          |          |          |          |          |          |                   |          |
| <b>B*52:01:02G total</b>                                | <b>52:01:02G total</b> |           |                                               | <b>5018</b> | <b>343</b>   | <b>2101</b>   | <b>378</b>   | <b>7765</b>  | <b>669</b>  | <b>2782</b>  | <b>19056</b>  | <b>C</b>                                             | <b>C</b> | <b>C</b> | <b>C</b> | <b>C</b> | <b>C</b> | <b>C</b> | <b>C</b> | <b>C</b>          | <b>C</b> |
| B*52:01:02G                                             | 52:01:02G              |           | 52:01:02G                                     | 195         | 193          | 236           | 25           | 230          | 2           | 226          | 1107          | C                                                    | C        | I        | WD       | C        |          | C        | I        | C                 |          |
| B*52:01:02                                              | 52:01:02               |           | 52:01:02G                                     | 4823        | 150          | 1865          | 353          | 7535         | 667         | 2556         | 17949         | C                                                    | C        | C        | C        | C        | C        | C        | C        | C                 | C        |
| B*52:01:04                                              | 52:01:04               | HLA01677  |                                               | 0           | 0            | 0             | 0            | 2            | 1           | 0            | 3             |                                                      |          |          |          |          |          |          |          |                   |          |
| B*52:01:05                                              | 52:01:05               | HLA04115  |                                               | 0           | 7            | 1             | 1            | 0            | 0           | 2            | 11            |                                                      | WD       |          |          |          |          |          |          | WD                | WD       |

| Supplemental Table 9: HLA-B Allele Summary <sup>a</sup> |                    |           | Allele Count by Population Group <sup>b</sup> |          |          |           |          |           |          |          |           | 3.0.0 CIWD Category by Population Group <sup>c</sup> |     |           |      |           |     |     |           |                   |
|---------------------------------------------------------|--------------------|-----------|-----------------------------------------------|----------|----------|-----------|----------|-----------|----------|----------|-----------|------------------------------------------------------|-----|-----------|------|-----------|-----|-----|-----------|-------------------|
| Allele                                                  | Genomic typing     | Allele ID | G group                                       | AFA      | API      | EURO      | MENA     | HIS       | NAM      | UNK      | Total     | AFA                                                  | API | EURO      | MENA | HIS       | NAM | UNK | Total     | Highest Frequency |
| B*52:01:06                                              | 52:01:06           | HLA05486  |                                               | 0        | 5        | 0         | 0        | 0         | 0        | 0        | 5         | WD                                                   |     |           |      |           |     |     | WD        | WD                |
| B*52:01:07                                              | 52:01:07           | HLA05927  |                                               | 0        | 57       | 1         | 1        | 0         | 0        | 1        | 60        | I                                                    |     |           |      |           |     |     | WD        | I                 |
| B*52:01:09                                              | 52:01:09           | HLA06221  |                                               | 0        | 0        | 2         | 0        | 0         | 0        | 3        | 5         |                                                      |     |           |      |           |     |     | WD        | WD                |
| B*52:01:11                                              | 52:01:11           | HLA07707  |                                               | 0        | 2        | 0         | 1        | 0         | 0        | 0        | 3         |                                                      |     |           |      |           |     |     |           |                   |
| B*52:01:12                                              | 52:01:12           | HLA08065  |                                               | 0        | 2        | 0         | 0        | 0         | 0        | 0        | 2         |                                                      |     |           |      |           |     |     |           |                   |
| B*52:01:13                                              | 52:01:13           | HLA08364  |                                               | 0        | 0        | 1         | 0        | 1         | 0        | 0        | 2         |                                                      |     |           |      |           |     |     |           |                   |
| B*52:01:14                                              | 52:01:14           | HLA08366  |                                               | 0        | 11       | 0         | 0        | 0         | 0        | 0        | 11        | WD                                                   |     |           |      |           |     |     | WD        | WD                |
| B*52:01:16                                              | 52:01:16           | HLA08675  |                                               | 0        | 1        | 0         | 0        | 0         | 0        | 0        | 1         |                                                      |     |           |      |           |     |     |           |                   |
| B*52:01:17                                              | 52:01:17           | HLA08989  |                                               | 0        | 0        | 0         | 0        | 0         | 0        | 1        | 1         |                                                      |     |           |      |           |     |     |           |                   |
| B*52:01:18                                              | 52:01:18           | HLA09902  |                                               | 0        | 3        | 0         | 0        | 0         | 0        | 0        | 3         |                                                      |     |           |      |           |     |     |           |                   |
| B*52:01:19                                              | 52:01:19           | HLA10031  |                                               | 0        | 0        | 0         | 0        | 0         | 0        | 1        | 1         |                                                      |     |           |      |           |     |     |           |                   |
| B*52:01:20                                              | 52:01:20           | HLA10761  |                                               | 0        | 0        | 0         | 0        | 0         | 0        | 1        | 1         |                                                      |     |           |      |           |     |     |           |                   |
| B*52:01:21                                              | 52:01:21           | HLA12283  |                                               | 0        | 1        | 0         | 0        | 0         | 0        | 0        | 1         |                                                      |     |           |      |           |     |     |           |                   |
| B*52:01:23                                              | 52:01:23           | HLA12999  |                                               | 0        | 1        | 0         | 0        | 0         | 0        | 0        | 1         |                                                      |     |           |      |           |     |     |           |                   |
| <b>B*52:02 total</b>                                    | <b>52:02 total</b> |           |                                               | <b>0</b> | <b>0</b> | <b>5</b>  | <b>0</b> | <b>27</b> | <b>2</b> | <b>0</b> | <b>34</b> |                                                      |     | <b>WD</b> |      | <b>I</b>  |     |     | <b>WD</b> | <b>I</b>          |
| B*52:02                                                 | 52:02              |           |                                               | 0        | 0        | 2         | 0        | 5         | 1        | 0        | 8         |                                                      |     |           |      | WD        |     |     | WD        | WD                |
| B*52:02:01                                              | 52:02:01           | HLA01141  |                                               | 0        | 0        | 3         | 0        | 22        | 1        | 0        | 26        |                                                      |     |           |      | I         |     |     | WD        | I                 |
| B*52:03                                                 | 52:03              | HLA01295  |                                               | 0        | 0        | 2         | 0        | 13        | 0        | 0        | 15        |                                                      |     |           |      | I         |     |     | WD        | I                 |
| B*52:04                                                 | 52:04              | HLA01580  |                                               | 5        | 1506     | 9         | 4        | 0         | 10       | 23       | 1557      | WD                                                   | C   | WD        |      |           | C   | I   | I         | C                 |
| B*52:05                                                 | 52:05              | HLA01627  |                                               | 0        | 0        | 1         | 0        | 0         | 0        | 1        | 2         |                                                      |     |           |      |           |     |     |           |                   |
| <b>B*52:06 total</b>                                    | <b>52:06 total</b> |           |                                               | <b>0</b> | <b>2</b> | <b>29</b> | <b>0</b> | <b>0</b>  | <b>0</b> | <b>0</b> | <b>31</b> |                                                      |     | <b>WD</b> |      |           |     |     | <b>WD</b> | <b>WD</b>         |
| B*52:06                                                 | 52:06              |           |                                               | 0        | 0        | 2         | 0        | 0         | 0        | 0        | 2         |                                                      |     |           |      |           |     |     |           |                   |
| B*52:06:02                                              | 52:06:02           | HLA03009  |                                               | 0        | 0        | 26        | 0        | 0         | 0        | 0        | 26        |                                                      |     | WD        |      |           |     |     | WD        | WD                |
| B*52:06:03                                              | 52:06:03           | HLA13000  |                                               | 0        | 2        | 1         | 0        | 0         | 0        | 0        | 3         |                                                      |     |           |      |           |     |     |           |                   |
| B*52:08                                                 | 52:08              | HLA02212  |                                               | 0        | 0        | 3         | 0        | 0         | 0        | 0        | 3         |                                                      |     |           |      |           |     |     |           |                   |
| <b>B*52:10 total</b>                                    | <b>52:10 total</b> |           |                                               | <b>0</b> | <b>2</b> | <b>5</b>  | <b>0</b> | <b>7</b>  | <b>2</b> | <b>4</b> | <b>20</b> |                                                      |     | <b>WD</b> |      | <b>WD</b> |     |     | <b>WD</b> | <b>WD</b>         |
| B*52:10:01                                              | 52:10:01           | HLA02585  |                                               | 0        | 2        | 4         | 0        | 7         | 2        | 4        | 19        |                                                      |     |           |      | WD        |     |     | WD        | WD                |
| B*52:10:02                                              | 52:10:02           | HLA06978  |                                               | 0        | 0        | 1         | 0        | 0         | 0        | 0        | 1         |                                                      |     |           |      |           |     |     |           |                   |
| B*52:11                                                 | 52:11              | HLA02793  |                                               | 0        | 3        | 6         | 3        | 0         | 0        | 0        | 12        |                                                      |     | WD        |      |           |     |     | WD        | WD                |
| B*52:17                                                 | 52:17              | HLA04450  |                                               | 0        | 4        | 0         | 0        | 0         | 0        | 1        | 5         |                                                      |     |           |      |           |     |     | WD        | WD                |
| B*52:19                                                 | 52:19              | HLA04498  |                                               | 0        | 3        | 0         | 0        | 0         | 0        | 0        | 3         |                                                      |     |           |      |           |     |     |           |                   |

| Supplemental Table 9: HLA-B Allele Summary <sup>a</sup> |                        |           | Allele Count by Population Group <sup>b</sup> |              |             |              |             |             |             |              |               | 3.0.0 CIWD Category by Population Group <sup>c</sup> |          |           |          |           |          |          |           |                   |
|---------------------------------------------------------|------------------------|-----------|-----------------------------------------------|--------------|-------------|--------------|-------------|-------------|-------------|--------------|---------------|------------------------------------------------------|----------|-----------|----------|-----------|----------|----------|-----------|-------------------|
| Allele                                                  | Genomic typing         | Allele ID | G group                                       | AFA          | API         | EURO         | MENA        | HIS         | NAM         | UNK          | Total         | AFA                                                  | API      | EURO      | MENA     | HIS       | NAM      | UNK      | Total     | Highest Frequency |
| B*52:20                                                 | 52:20                  | HLA04733  |                                               | 0            | 2           | 0            | 0           | 0           | 0           | 1            | 3             |                                                      |          |           |          |           |          |          |           |                   |
| <b>B*52:21 total</b>                                    | <b>52:21 total</b>     |           |                                               | <b>0</b>     | <b>0</b>    | <b>5</b>     | <b>0</b>    | <b>6</b>    | <b>0</b>    | <b>4</b>     | <b>15</b>     |                                                      |          | <b>WD</b> |          | <b>WD</b> |          |          | <b>WD</b> | <b>WD</b>         |
| B*52:21                                                 | 52:21                  |           |                                               | 0            | 0           | 5            | 0           | 6           | 0           | 4            | 15            |                                                      |          | WD        |          | WD        |          |          | WD        | WD                |
| <b>B*52:25 total</b>                                    | <b>52:25 total</b>     |           |                                               | <b>0</b>     | <b>0</b>    | <b>24</b>    | <b>0</b>    | <b>0</b>    | <b>0</b>    | <b>0</b>     | <b>24</b>     |                                                      |          | <b>WD</b> |          |           |          |          | <b>WD</b> | <b>WD</b>         |
| B*52:25                                                 | 52:25                  |           |                                               | 0            | 0           | 17           | 0           | 0           | 0           | 0            | 17            |                                                      |          | WD        |          |           |          |          | WD        | WD                |
| B*52:25:01                                              | 52:25:01               | HLA06963  |                                               | 0            | 0           | 3            | 0           | 0           | 0           | 0            | 3             |                                                      |          |           |          |           |          |          |           |                   |
| B*52:25:02                                              | 52:25:02               | HLA15274  |                                               | 0            | 0           | 4            | 0           | 0           | 0           | 0            | 4             |                                                      |          |           |          |           |          |          |           |                   |
| B*52:27                                                 | 52:27                  | HLA07336  |                                               | 0            | 4           | 2            | 0           | 0           | 0           | 0            | 6             |                                                      |          |           |          |           |          |          | WD        | WD                |
| B*52:28                                                 | 52:28                  | HLA07823  |                                               | 0            | 4           | 0            | 0           | 0           | 0           | 0            | 4             |                                                      |          |           |          |           |          |          |           |                   |
| B*52:30                                                 | 52:30                  | HLA08064  |                                               | 0            | 1           | 0            | 0           | 0           | 0           | 0            | 1             |                                                      |          |           |          |           |          |          |           |                   |
| <b>B*52:31 total</b>                                    | <b>52:31 total</b>     |           |                                               | <b>0</b>     | <b>0</b>    | <b>1</b>     | <b>0</b>    | <b>0</b>    | <b>0</b>    | <b>0</b>     | <b>1</b>      |                                                      |          |           |          |           |          |          |           |                   |
| B*52:31:01                                              | 52:31:01               | HLA08363  |                                               | 0            | 0           | 1            | 0           | 0           | 0           | 0            | 1             |                                                      |          |           |          |           |          |          |           |                   |
| B*52:37                                                 | 52:37                  | HLA11022  |                                               | 0            | 4           | 1            | 0           | 0           | 0           | 0            | 5             |                                                      |          |           |          |           |          |          | WD        | WD                |
| B*52:39                                                 | 52:39                  | HLA11427  |                                               | 0            | 1           | 0            | 0           | 0           | 0           | 0            | 1             |                                                      |          |           |          |           |          |          |           |                   |
| B*52:40                                                 | 52:40                  | HLA11732  |                                               | 0            | 0           | 1            | 0           | 0           | 0           | 0            | 1             |                                                      |          |           |          |           |          |          |           |                   |
| B*52:48                                                 | 52:48                  | HLA13478  |                                               | 0            | 0           | 0            | 0           | 1           | 0           | 0            | 1             |                                                      |          |           |          |           |          |          |           |                   |
| B*52:50                                                 | 52:50                  | HLA13613  |                                               | 0            | 0           | 1            | 0           | 0           | 0           | 0            | 1             |                                                      |          |           |          |           |          |          |           |                   |
| B*52:51                                                 | 52:51                  | HLA13851  |                                               | 0            | 0           | 1            | 0           | 0           | 0           | 0            | 1             |                                                      |          |           |          |           |          |          |           |                   |
| B*52:54                                                 | 52:54                  | HLA14092  |                                               | 0            | 1           | 0            | 0           | 0           | 0           | 0            | 1             |                                                      |          |           |          |           |          |          |           |                   |
| B*52:58                                                 | 52:58                  | HLA14439  |                                               | 0            | 1           | 0            | 0           | 0           | 0           | 0            | 1             |                                                      |          |           |          |           |          |          |           |                   |
| B*52:59                                                 | 52:59                  | HLA14441  |                                               | 0            | 1           | 0            | 0           | 0           | 0           | 0            | 1             |                                                      |          |           |          |           |          |          |           |                   |
| B*52:60                                                 | 52:60                  | HLA14728  |                                               | 0            | 2           | 0            | 0           | 0           | 0           | 0            | 2             |                                                      |          |           |          |           |          |          |           |                   |
| B*52:61                                                 | 52:61                  | HLA14732  |                                               | 0            | 0           | 1            | 0           | 0           | 0           | 0            | 1             |                                                      |          |           |          |           |          |          |           |                   |
| B*52:62                                                 | 52:62                  | HLA15965  |                                               | 0            | 1           | 0            | 0           | 0           | 0           | 0            | 1             |                                                      |          |           |          |           |          |          |           |                   |
| B*52:63                                                 | 52:63                  | HLA15966  |                                               | 0            | 1           | 0            | 0           | 0           | 0           | 0            | 1             |                                                      |          |           |          |           |          |          |           |                   |
| B*52:CODE                                               | 52:CODE                |           |                                               | 217          | 1325        | 9702         | 710         | 984         | 80          | 1553         | 14571         | NA                                                   | NA       | NA        | NA       | NA        | NA       | NA       | NA        | NA                |
| <b>B*53:01 total</b>                                    | <b>53:01 total</b>     |           |                                               | <b>42405</b> | <b>1386</b> | <b>34181</b> | <b>5821</b> | <b>9969</b> | <b>1408</b> | <b>16966</b> | <b>112136</b> | <b>C</b>                                             | <b>C</b> | <b>C</b>  | <b>C</b> | <b>C</b>  | <b>C</b> | <b>C</b> | <b>C</b>  | <b>C</b>          |
| B*53:01                                                 | 53:01                  |           |                                               | 2428         | 23          | 1826         | 153         | 1095        | 98          | 643          | 6266          | C                                                    | I        | C         | C        | C         | C        | C        | C         | C                 |
| B*53:01P                                                | 53:01P                 |           |                                               | 3            | 0           | 141          | 3           | 3           | 0           | 1            | 151           |                                                      |          | I         |          |           |          |          | WD        | I                 |
| <b>B*53:01:01G total</b>                                | <b>53:01:01G total</b> |           |                                               | <b>39947</b> | <b>1353</b> | <b>32211</b> | <b>5665</b> | <b>8869</b> | <b>1310</b> | <b>16315</b> | <b>105670</b> | <b>C</b>                                             | <b>C</b> | <b>C</b>  | <b>C</b> | <b>C</b>  | <b>C</b> | <b>C</b> | <b>C</b>  | <b>C</b>          |
| B*53:01:01G                                             | 53:01:01G              |           | 53:01:01G                                     | 14896        | 967         | 20254        | 4354        | 3385        | 320         | 7938         | 52114         | C                                                    | C        | C         | C        | C         | C        | C        | C         | C                 |

| Supplemental Table 9: HLA-B Allele Summary <sup>a</sup> |                    |           | Allele Count by Population Group <sup>b</sup> |          |          |            |           |          |          |           |            | 3.0.0 CIWD Category by Population Group <sup>c</sup> |     |          |           |     |     |           |          |                   |   |
|---------------------------------------------------------|--------------------|-----------|-----------------------------------------------|----------|----------|------------|-----------|----------|----------|-----------|------------|------------------------------------------------------|-----|----------|-----------|-----|-----|-----------|----------|-------------------|---|
| Allele                                                  | Genomic typing     | Allele ID | G group                                       | AFA      | API      | EURO       | MENA      | HIS      | NAM      | UNK       | Total      | AFA                                                  | API | EURO     | MENA      | HIS | NAM | UNK       | Total    | Highest Frequency |   |
| B*53:01:01                                              | 53:01:01           | HLA00364  | 53:01:01G                                     | 25016    | 386      | 11956      | 1311      | 5483     | 990      | 8373      | 53515      | C                                                    | C   | C        | C         | C   | C   | C         | C        | C                 | C |
| B*53:37                                                 | 53:37              | HLA11955  | 53:01:01G                                     | 35       | 0        | 1          | 0         | 1        | 0        | 4         | 41         | WD                                                   |     |          |           |     |     |           | WD       | WD                |   |
| B*53:01:02                                              | 53:01:02           | HLA01922  |                                               | 1        | 0        | 0          | 0         | 0        | 0        | 0         | 1          |                                                      |     |          |           |     |     |           |          |                   |   |
| B*53:01:03                                              | 53:01:03           | HLA02114  |                                               | 0        | 10       | 2          | 0         | 0        | 0        | 0         | 12         |                                                      | WD  |          |           |     |     |           | WD       | WD                |   |
| B*53:01:05                                              | 53:01:05           | HLA04244  |                                               | 17       | 0        | 0          | 0         | 1        | 0        | 4         | 22         | WD                                                   |     |          |           |     |     |           | WD       | WD                |   |
| B*53:01:06                                              | 53:01:06           | HLA07643  |                                               | 5        | 0        | 1          | 0         | 0        | 0        | 0         | 6          | WD                                                   |     |          |           |     |     |           | WD       | WD                |   |
| B*53:01:07                                              | 53:01:07           | HLA07702  |                                               | 2        | 0        | 0          | 0         | 0        | 0        | 2         | 4          |                                                      |     |          |           |     |     |           |          |                   |   |
| B*53:01:10                                              | 53:01:10           | HLA11039  |                                               | 0        | 0        | 0          | 0         | 0        | 0        | 1         | 1          |                                                      |     |          |           |     |     |           |          |                   |   |
| B*53:01:11                                              | 53:01:11           | HLA13537  |                                               | 2        | 0        | 0          | 0         | 1        | 0        | 0         | 3          |                                                      |     |          |           |     |     |           |          |                   |   |
| B*53:02                                                 | 53:02              | HLA00365  |                                               | 0        | 0        | 1          | 0         | 0        | 0        | 0         | 1          |                                                      |     |          |           |     |     |           |          |                   |   |
| B*53:04                                                 | 53:04              | HLA00987  |                                               | 0        | 4        | 14         | 4         | 2        | 0        | 4         | 28         |                                                      |     | WD       |           |     |     |           | WD       | WD                |   |
| <b>B*53:05 total</b>                                    | <b>53:05 total</b> |           |                                               | <b>0</b> | <b>2</b> | <b>235</b> | <b>10</b> | <b>2</b> | <b>0</b> | <b>13</b> | <b>262</b> |                                                      |     | <b>I</b> | <b>WD</b> |     |     | <b>WD</b> | <b>I</b> | <b>I</b>          |   |
| B*53:05                                                 | 53:05              |           |                                               | 0        | 1        | 202        | 9         | 2        | 0        | 12        | 226        |                                                      |     | I        | WD        |     |     | WD        | I        | I                 |   |
| B*53:05:01                                              | 53:05:01           | HLA01178  |                                               | 0        | 1        | 33         | 1         | 0        | 0        | 1         | 36         |                                                      |     | WD       |           |     |     | WD        | WD       |                   |   |
| B*53:06                                                 | 53:06              | HLA01261  |                                               | 0        | 0        | 75         | 1         | 0        | 0        | 0         | 76         |                                                      |     | WD       |           |     |     | WD        | WD       |                   |   |
| <b>B*53:08 total</b>                                    | <b>53:08 total</b> |           |                                               | <b>2</b> | <b>0</b> | <b>0</b>   | <b>0</b>  | <b>0</b> | <b>0</b> | <b>0</b>  | <b>2</b>   |                                                      |     |          |           |     |     |           |          |                   |   |
| B*53:08                                                 | 53:08              |           |                                               | 2        | 0        | 0          | 0         | 0        | 0        | 0         | 2          |                                                      |     |          |           |     |     |           |          |                   |   |
| B*53:09                                                 | 53:09              | HLA01522  |                                               | 0        | 55       | 0          | 0         | 0        | 0        | 0         | 55         |                                                      | I   |          |           |     |     |           | WD       | I                 |   |
| B*53:10                                                 | 53:10              | HLA02078  |                                               | 0        | 0        | 11         | 0         | 5        | 0        | 5         | 21         |                                                      |     | WD       |           | WD  |     | WD        | WD       | WD                |   |
| B*53:12                                                 | 53:12              | HLA02636  |                                               | 0        | 0        | 1          | 0         | 0        | 0        | 0         | 1          |                                                      |     |          |           |     |     |           |          |                   |   |
| B*53:13                                                 | 53:13              | HLA02942  |                                               | 0        | 0        | 3          | 0         | 0        | 0        | 1         | 4          |                                                      |     |          |           |     |     |           |          |                   |   |
| B*53:15                                                 | 53:15              | HLA03209  |                                               | 6        | 0        | 0          | 0         | 0        | 0        | 0         | 6          | WD                                                   |     |          |           |     |     |           | WD       | WD                |   |
| B*53:16                                                 | 53:16              | HLA03274  |                                               | 0        | 0        | 2          | 0         | 0        | 0        | 1         | 3          |                                                      |     |          |           |     |     |           |          |                   |   |
| <b>B*53:17 total</b>                                    | <b>53:17 total</b> |           |                                               | <b>0</b> | <b>0</b> | <b>2</b>   | <b>0</b>  | <b>0</b> | <b>0</b> | <b>1</b>  | <b>3</b>   |                                                      |     |          |           |     |     |           |          |                   |   |
| B*53:17:02                                              | 53:17:02           | HLA06050  |                                               | 0        | 0        | 2          | 0         | 0        | 0        | 1         | 3          |                                                      |     |          |           |     |     |           |          |                   |   |
| B*53:18                                                 | 53:18              | HLA03609  |                                               | 4        | 0        | 0          | 0         | 0        | 0        | 1         | 5          |                                                      |     |          |           |     |     |           | WD       | WD                |   |
| B*53:19                                                 | 53:19              | HLA04095  |                                               | 0        | 0        | 2          | 0         | 0        | 0        | 0         | 2          |                                                      |     |          |           |     |     |           |          |                   |   |
| B*53:20                                                 | 53:20              | HLA04462  |                                               | 6        | 0        | 0          | 0         | 0        | 0        | 1         | 7          | WD                                                   |     |          |           |     |     |           | WD       | WD                |   |
| B*53:21                                                 | 53:21              | HLA04412  |                                               | 0        | 0        | 1          | 0         | 0        | 0        | 0         | 1          |                                                      |     |          |           |     |     |           |          |                   |   |
| B*53:22                                                 | 53:22              | HLA04713  |                                               | 0        | 0        | 0          | 0         | 0        | 0        | 1         | 1          |                                                      |     |          |           |     |     |           |          |                   |   |
| B*53:23                                                 | 53:23              | HLA04817  |                                               | 0        | 0        | 3          | 0         | 1        | 0        | 1         | 5          |                                                      |     |          |           |     |     |           | WD       | WD                |   |

| Supplemental Table 9: HLA-B Allele Summary <sup>a</sup> |                        |           | Allele Count by Population Group <sup>b</sup> |             |              |               |              |             |            |              |               | 3.0.0 CIWD Category by Population Group <sup>c</sup> |          |          |          |          |          |          |          |                   |
|---------------------------------------------------------|------------------------|-----------|-----------------------------------------------|-------------|--------------|---------------|--------------|-------------|------------|--------------|---------------|------------------------------------------------------|----------|----------|----------|----------|----------|----------|----------|-------------------|
| Allele                                                  | Genomic typing         | Allele ID | G group                                       | AFA         | API          | EURO          | MENA         | HIS         | NAM        | UNK          | Total         | AFA                                                  | API      | EURO     | MENA     | HIS      | NAM      | UNK      | Total    | Highest Frequency |
| B*53:24                                                 | 53:24                  | HLA05862  |                                               | 0           | 0            | 6             | 2            | 0           | 0          | 1            | 9             |                                                      |          | WD       |          |          |          |          | WD       | WD                |
| B*53:25                                                 | 53:25                  | HLA06687  |                                               | 1           | 0            | 0             | 0            | 0           | 0          | 0            | 1             |                                                      |          |          |          |          |          |          |          |                   |
| B*53:26                                                 | 53:26                  | HLA06934  |                                               | 2           | 0            | 0             | 0            | 0           | 0          | 0            | 2             |                                                      |          |          |          |          |          |          |          |                   |
| B*53:27                                                 | 53:27                  | HLA07192  |                                               | 1           | 0            | 0             | 0            | 0           | 0          | 0            | 1             |                                                      |          |          |          |          |          |          |          |                   |
| B*53:28                                                 | 53:28                  | HLA08066  |                                               | 0           | 10           | 0             | 0            | 0           | 0          | 0            | 10            |                                                      | WD       |          |          |          |          |          | WD       | WD                |
| B*53:29                                                 | 53:29                  | HLA08355  |                                               | 0           | 0            | 0             | 0            | 1           | 0          | 1            | 2             |                                                      |          |          |          |          |          |          |          |                   |
| B*53:30                                                 | 53:30                  | HLA09439  |                                               | 1           | 0            | 0             | 0            | 0           | 0          | 0            | 1             |                                                      |          |          |          |          |          |          |          |                   |
| B*53:31                                                 | 53:31                  | HLA09681  |                                               | 0           | 0            | 5             | 0            | 0           | 0          | 0            | 5             |                                                      |          | WD       |          |          |          |          | WD       | WD                |
| B*53:33                                                 | 53:33                  | HLA11021  |                                               | 0           | 2            | 1             | 0            | 0           | 0          | 1            | 4             |                                                      |          |          |          |          |          |          |          |                   |
| B*53:36                                                 | 53:36                  | HLA11827  |                                               | 0           | 0            | 1             | 0            | 0           | 0          | 0            | 1             |                                                      |          |          |          |          |          |          |          |                   |
| B*53:38                                                 | 53:38                  | HLA12282  |                                               | 0           | 0            | 1             | 0            | 0           | 0          | 0            | 1             |                                                      |          |          |          |          |          |          |          |                   |
| B*53:CODE                                               | 53:CODE                |           |                                               | 2469        | 50           | 3267          | 301          | 867         | 93         | 1635         | 8682          | NA                                                   | NA       | NA       | NA       | NA       | NA       | NA       | NA       | NA                |
| <b>B*54:01 total</b>                                    | <b>54:01 total</b>     |           |                                               | <b>9</b>    | <b>9154</b>  | <b>840</b>    | <b>400</b>   | <b>36</b>   | <b>7</b>   | <b>1576</b>  | <b>12022</b>  | <b>WD</b>                                            | <b>C</b> | <b>I</b> | <b>C</b> | <b>I</b> | <b>C</b> | <b>C</b> | <b>C</b> | <b>C</b>          |
| B*54:01                                                 | 54:01                  |           |                                               | 0           | 3            | 3             | 0            | 0           | 0          | 0            | 6             |                                                      |          |          |          |          |          |          | WD       | WD                |
| B*54:01P                                                | 54:01P                 |           |                                               | 0           | 1            | 0             | 0            | 0           | 0          | 0            | 1             |                                                      |          |          |          |          |          |          |          |                   |
| <b>B*54:01:01G total</b>                                | <b>54:01:01G total</b> |           |                                               | <b>9</b>    | <b>9149</b>  | <b>837</b>    | <b>400</b>   | <b>36</b>   | <b>7</b>   | <b>1576</b>  | <b>12014</b>  | <b>WD</b>                                            | <b>C</b> | <b>I</b> | <b>C</b> | <b>I</b> | <b>C</b> | <b>C</b> | <b>C</b> | <b>C</b>          |
| B*54:01:01G                                             | 54:01:01G              |           | 54:01:01G                                     | 9           | 6734         | 805           | 396          | 31          | 5          | 1060         | 9040          | WD                                                   | C        | I        | C        | I        | WD       | C        | C        | C                 |
| B*54:01:01                                              | 54:01:01               | HLA00367  | 54:01:01G                                     | 0           | 2415         | 32            | 4            | 5           | 2          | 516          | 2974          |                                                      | C        | WD       |          | WD       |          | C        | C        | C                 |
| B*54:01:07                                              | 54:01:07               | HLA13484  |                                               | 0           | 1            | 0             | 0            | 0           | 0          | 0            | 1             |                                                      |          |          |          |          |          |          |          |                   |
| B*54:03                                                 | 54:03                  | HLA02027  |                                               | 0           | 0            | 0             | 1            | 0           | 0          | 0            | 1             |                                                      |          |          |          |          |          |          |          |                   |
| B*54:10                                                 | 54:10                  | HLA02716  |                                               | 0           | 1            | 0             | 0            | 0           | 0          | 0            | 1             |                                                      |          |          |          |          |          |          |          |                   |
| B*54:20                                                 | 54:20                  | HLA04719  |                                               | 0           | 1            | 0             | 0            | 0           | 0          | 0            | 1             |                                                      |          |          |          |          |          |          |          |                   |
| B*54:23                                                 | 54:23                  | HLA05401  |                                               | 0           | 1            | 0             | 0            | 0           | 0          | 0            | 1             |                                                      |          |          |          |          |          |          |          |                   |
| B*54:33                                                 | 54:33                  | HLA12012  |                                               | 0           | 1            | 0             | 0            | 0           | 0          | 0            | 1             |                                                      |          |          |          |          |          |          |          |                   |
| B*54:CODE                                               | 54:CODE                |           |                                               | 1           | 672          | 57            | 4            | 1           | 1          | 82           | 818           | NA                                                   | NA       | NA       | NA       | NA       | NA       | NA       | NA       | NA                |
| <b>B*55:01 total</b>                                    | <b>55:01 total</b>     |           |                                               | <b>1374</b> | <b>20917</b> | <b>174535</b> | <b>10202</b> | <b>5843</b> | <b>582</b> | <b>18338</b> | <b>231791</b> | <b>C</b>                                             | <b>C</b> | <b>C</b> | <b>C</b> | <b>C</b> | <b>C</b> | <b>C</b> | <b>C</b> | <b>C</b>          |
| B*55:01                                                 | 55:01                  |           |                                               | 704         | 1534         | 47367         | 2662         | 2792        | 368        | 9561         | 64988         | C                                                    | C        | C        | C        | C        | C        | C        | C        | C                 |
| B*55:01P                                                | 55:01P                 |           |                                               | 0           | 0            | 77            | 2            | 0           | 0          | 0            | 79            |                                                      |          | WD       |          |          |          |          | WD       | WD                |
| <b>B*55:01:01G total</b>                                | <b>55:01:01G total</b> |           |                                               | <b>670</b>  | <b>19242</b> | <b>127000</b> | <b>7531</b>  | <b>3048</b> | <b>214</b> | <b>8767</b>  | <b>166472</b> | <b>C</b>                                             | <b>C</b> | <b>C</b> | <b>C</b> | <b>C</b> | <b>C</b> | <b>C</b> | <b>C</b> | <b>C</b>          |
| B*55:01:01G                                             | 55:01:01G              |           | 55:01:01G                                     | 376         | 18263        | 116297        | 7241         | 1358        | 82         | 7077         | 150694        | C                                                    | C        | C        | C        | C        | C        | C        | C        | C                 |
| B*55:01:01                                              | 55:01:01               | HLA00368  | 55:01:01G                                     | 281         | 978          | 10526         | 289          | 1681        | 131        | 1655         | 15541         | C                                                    | C        | C        | C        | C        | C        | C        | C        | C                 |

| Supplemental Table 9: HLA-B Allele Summary <sup>a</sup> |                        |           | Allele Count by Population Group <sup>b</sup> |           |             |            |            |           |          |             |             | 3.0.0 CIWD Category by Population Group <sup>c</sup> |          |          |          |          |          |          |          |                   |
|---------------------------------------------------------|------------------------|-----------|-----------------------------------------------|-----------|-------------|------------|------------|-----------|----------|-------------|-------------|------------------------------------------------------|----------|----------|----------|----------|----------|----------|----------|-------------------|
| Allele                                                  | Genomic typing         | Allele ID | G group                                       | AFA       | API         | EURO       | MENA       | HIS       | NAM      | UNK         | Total       | AFA                                                  | API      | EURO     | MENA     | HIS      | NAM      | UNK      | Total    | Highest Frequency |
| B*55:01:03                                              | 55:01:03               | HLA02324  | 55:01:01G                                     | 13        | 1           | 176        | 1          | 9         | 1        | 35          | 236         | WD                                                   |          | I        |          | I        |          | I        | I        | I                 |
| B*55:85                                                 | 55:85                  | HLA16755  | 55:01:01G                                     | 0         | 0           | 1          | 0          | 0         | 0        | 0           | 1           |                                                      |          |          |          |          |          |          |          |                   |
| B*55:01:02                                              | 55:01:02               | HLA02137  |                                               | 0         | 0           | 23         | 0          | 0         | 0        | 4           | 27          |                                                      |          | WD       |          |          |          |          | WD       | WD                |
| B*55:01:04                                              | 55:01:04               | HLA02335  |                                               | 0         | 137         | 14         | 7          | 2         | 0        | 3           | 163         |                                                      | C        | WD       | WD       |          |          |          | I        | C                 |
| B*55:01:05                                              | 55:01:05               | HLA04185  |                                               | 0         | 0           | 14         | 0          | 0         | 0        | 0           | 14          |                                                      |          | WD       |          |          |          |          | WD       | WD                |
| B*55:01:06                                              | 55:01:06               | HLA04214  |                                               | 0         | 1           | 37         | 0          | 1         | 0        | 3           | 42          |                                                      |          | WD       |          |          |          |          | WD       | WD                |
| B*55:01:09                                              | 55:01:09               | HLA07657  |                                               | 0         | 2           | 0          | 0          | 0         | 0        | 0           | 2           |                                                      |          |          |          |          |          |          |          |                   |
| B*55:01:10                                              | 55:01:10               | HLA08679  |                                               | 0         | 0           | 1          | 0          | 0         | 0        | 0           | 1           |                                                      |          |          |          |          |          |          |          |                   |
| B*55:01:15                                              | 55:01:15               | HLA13798  |                                               | 0         | 0           | 2          | 0          | 0         | 0        | 0           | 2           |                                                      |          |          |          |          |          |          |          |                   |
| B*55:01:16                                              | 55:01:16               | HLA14733  |                                               | 0         | 1           | 0          | 0          | 0         | 0        | 0           | 1           |                                                      |          |          |          |          |          |          |          |                   |
| <b>B*55:02 total</b>                                    | <b>55:02 total</b>     |           |                                               | <b>21</b> | <b>7346</b> | <b>545</b> | <b>104</b> | <b>32</b> | <b>7</b> | <b>1349</b> | <b>9404</b> | <b>WD</b>                                            | <b>C</b> | <b>I</b> | <b>C</b> | <b>I</b> | <b>C</b> | <b>C</b> | <b>C</b> | <b>C</b>          |
| B*55:02                                                 | 55:02                  |           |                                               | 6         | 1633        | 96         | 22         | 10        | 4        | 391         | 2162        | WD                                                   | C        | WD       | WD       | I        |          | C        | C        | C                 |
| B*55:02P                                                | 55:02P                 |           |                                               | 0         | 0           | 5          | 1          | 0         | 0        | 0           | 6           |                                                      |          | WD       |          |          |          |          | WD       | WD                |
| <b>B*55:02:01G total</b>                                | <b>55:02:01G total</b> |           |                                               | <b>15</b> | <b>5692</b> | <b>444</b> | <b>81</b>  | <b>22</b> | <b>3</b> | <b>956</b>  | <b>7213</b> | <b>WD</b>                                            | <b>C</b> | <b>I</b> | <b>C</b> | <b>I</b> |          | <b>C</b> | <b>C</b> | <b>C</b>          |
| B*55:02:01G                                             | 55:02:01G              |           | 55:02:01G                                     | 6         | 4236        | 407        | 76         | 15        | 2        | 453         | 5195        | WD                                                   | C        | I        | C        | I        |          | C        | C        | C                 |
| B*55:02:01                                              | 55:02:01               |           | 55:02:01G                                     | 9         | 1423        | 35         | 5          | 7         | 1        | 498         | 1978        | WD                                                   | C        | WD       | WD       | WD       |          | C        | C        | C                 |
| B*55:02:01:01                                           | 55:02:01:01            | HLA00369  | 55:02:01G                                     | 0         | 1           | 2          | 0          | 0         | 0        | 0           | 3           |                                                      |          |          |          |          |          |          |          |                   |
| B*55:02:01:02                                           | 55:02:01:02            | HLA12581  | 55:02:01G                                     | 0         | 32          | 0          | 0          | 0         | 0        | 5           | 37          |                                                      | I        |          |          |          |          | WD       | WD       | I                 |
| B*55:02:03                                              | 55:02:03               | HLA03513  |                                               | 0         | 20          | 0          | 0          | 0         | 0        | 2           | 22          |                                                      | I        |          |          |          |          |          | WD       | I                 |
| B*55:02:07                                              | 55:02:07               | HLA10412  |                                               | 0         | 1           | 0          | 0          | 0         | 0        | 0           | 1           |                                                      |          |          |          |          |          |          |          |                   |
| B*55:03                                                 | 55:03                  | HLA00370  |                                               | 0         | 35          | 0          | 0          | 1         | 0        | 1           | 37          |                                                      | I        |          |          |          |          |          | WD       | I                 |
| B*55:04                                                 | 55:04                  | HLA00371  |                                               | 0         | 211         | 5          | 2          | 1         | 0        | 44          | 263         |                                                      | C        | WD       |          |          |          | I        | I        | C                 |
| B*55:05                                                 | 55:05                  | HLA00372  |                                               | 1         | 0           | 16         | 0          | 2         | 0        | 1           | 20          |                                                      |          | WD       |          |          |          |          | WD       | WD                |
| B*55:07                                                 | 55:07                  | HLA00374  |                                               | 0         | 45          | 16         | 5          | 1         | 0        | 0           | 67          |                                                      | I        | WD       | WD       |          |          |          | WD       | I                 |
| B*55:08                                                 | 55:08                  | HLA00375  |                                               | 0         | 0           | 1          | 0          | 0         | 0        | 0           | 1           |                                                      |          |          |          |          |          |          |          |                   |
| B*55:09                                                 | 55:09                  | HLA01180  |                                               | 0         | 0           | 60         | 0          | 0         | 0        | 0           | 60          |                                                      |          | WD       |          |          |          |          | WD       | WD                |
| B*55:10                                                 | 55:10                  | HLA01205  |                                               | 0         | 1           | 0          | 0          | 0         | 0        | 1           | 2           |                                                      |          |          |          |          |          |          |          |                   |
| B*55:11                                                 | 55:11                  | HLA01507  |                                               | 0         | 0           | 26         | 0          | 5         | 0        | 1           | 32          |                                                      |          | WD       |          | WD       |          |          | WD       | WD                |
| B*55:12                                                 | 55:12                  | HLA01553  |                                               | 0         | 81          | 3          | 0          | 0         | 0        | 10          | 94          |                                                      | I        |          |          |          |          | WD       | WD       | I                 |
| B*55:14                                                 | 55:14                  | HLA01732  |                                               | 0         | 0           | 7          | 0          | 0         | 0        | 0           | 7           |                                                      |          | WD       |          |          |          |          | WD       | WD                |
| B*55:17                                                 | 55:17                  | HLA02092  |                                               | 0         | 0           | 34         | 0          | 0         | 0        | 2           | 36          |                                                      |          | WD       |          |          |          |          | WD       | WD                |

| Supplemental Table 9: HLA-B Allele Summary <sup>a</sup> |                |           | Allele Count by Population Group <sup>b</sup> |     |     |      |      |     |     |     |       | 3.0.0 CIWD Category by Population Group <sup>c</sup> |     |      |      |     |     |     |       |                   |
|---------------------------------------------------------|----------------|-----------|-----------------------------------------------|-----|-----|------|------|-----|-----|-----|-------|------------------------------------------------------|-----|------|------|-----|-----|-----|-------|-------------------|
| Allele                                                  | Genomic typing | Allele ID | G group                                       | AFA | API | EURO | MENA | HIS | NAM | UNK | Total | AFA                                                  | API | EURO | MENA | HIS | NAM | UNK | Total | Highest Frequency |
| B*55:18                                                 | 55:18          | HLA02093  |                                               | 0   | 3   | 0    | 0    | 0   | 0   | 4   | 7     |                                                      |     |      |      |     |     |     | WD    | WD                |
| B*55:20                                                 | 55:20          | HLA02320  |                                               | 0   | 0   | 7    | 0    | 0   | 0   | 0   | 7     |                                                      |     | WD   |      |     |     |     | WD    | WD                |
| B*55:21                                                 | 55:21          | HLA02518  |                                               | 0   | 1   | 2    | 8    | 0   | 0   | 1   | 12    |                                                      |     |      | WD   |     |     |     | WD    | WD                |
| B*55:22                                                 | 55:22          | HLA02539  |                                               | 0   | 1   | 1    | 0    | 0   | 0   | 2   | 4     |                                                      |     |      |      |     |     |     |       |                   |
| B*55:23                                                 | 55:23          | HLA02671  |                                               | 0   | 3   | 1    | 0    | 0   | 0   | 1   | 5     |                                                      |     |      |      |     |     |     | WD    | WD                |
| B*55:24                                                 | 55:24          | HLA02677  |                                               | 0   | 0   | 2    | 0    | 0   | 0   | 0   | 2     |                                                      |     |      |      |     |     |     |       |                   |
| B*55:25                                                 | 55:25          | HLA02782  |                                               | 0   | 0   | 47   | 0    | 0   | 0   | 1   | 48    |                                                      |     | WD   |      |     |     |     | WD    | WD                |
| B*55:26                                                 | 55:26          | HLA02845  |                                               | 0   | 3   | 0    | 0    | 0   | 0   | 0   | 3     |                                                      |     |      |      |     |     |     |       |                   |
| B*55:28                                                 | 55:28          | HLA03098  |                                               | 0   | 0   | 1    | 0    | 0   | 0   | 0   | 1     |                                                      |     |      |      |     |     |     |       |                   |
| B*55:29                                                 | 55:29          | HLA03195  |                                               | 0   | 0   | 5    | 0    | 0   | 0   | 0   | 5     |                                                      |     | WD   |      |     |     |     | WD    | WD                |
| B*55:30                                                 | 55:30          | HLA03228  |                                               | 0   | 2   | 0    | 0    | 0   | 0   | 0   | 2     |                                                      |     |      |      |     |     |     |       |                   |
| B*55:31                                                 | 55:31          | HLA03322  |                                               | 0   | 0   | 2    | 3    | 0   | 0   | 0   | 5     |                                                      |     |      |      |     |     |     | WD    | WD                |
| B*55:33                                                 | 55:33          | HLA03424  |                                               | 0   | 0   | 19   | 0    | 1   | 0   | 2   | 22    |                                                      |     | WD   |      |     |     |     | WD    | WD                |
| B*55:34                                                 | 55:34          | HLA03503  |                                               | 0   | 1   | 0    | 0    | 0   | 0   | 0   | 1     |                                                      |     |      |      |     |     |     |       |                   |
| B*55:36                                                 | 55:36          | HLA04047  |                                               | 0   | 0   | 1    | 0    | 0   | 0   | 0   | 1     |                                                      |     |      |      |     |     |     |       |                   |
| B*55:37                                                 | 55:37          | HLA03983  |                                               | 0   | 0   | 0    | 1    | 0   | 0   | 0   | 1     |                                                      |     |      |      |     |     |     |       |                   |
| B*55:40                                                 | 55:40          | HLA04821  |                                               | 0   | 0   | 3    | 0    | 0   | 0   | 0   | 3     |                                                      |     |      |      |     |     |     |       |                   |
| B*55:44                                                 | 55:44          | HLA05478  |                                               | 0   | 0   | 0    | 0    | 1   | 0   | 0   | 1     |                                                      |     |      |      |     |     |     |       |                   |
| B*55:45                                                 | 55:45          | HLA05507  |                                               | 0   | 0   | 13   | 0    | 0   | 0   | 0   | 13    |                                                      |     | WD   |      |     |     |     | WD    | WD                |
| B*55:49                                                 | 55:49          | HLA06053  |                                               | 0   | 1   | 0    | 0    | 0   | 0   | 1   | 2     |                                                      |     |      |      |     |     |     |       |                   |
| B*55:50                                                 | 55:50          | HLA06519  |                                               | 0   | 1   | 0    | 0    | 0   | 0   | 0   | 1     |                                                      |     |      |      |     |     |     |       |                   |
| B*55:51                                                 | 55:51          | HLA06584  |                                               | 0   | 3   | 0    | 0    | 0   | 0   | 0   | 3     |                                                      |     |      |      |     |     |     |       |                   |
| B*55:52                                                 | 55:52          | HLA06920  |                                               | 0   | 1   | 0    | 0    | 0   | 0   | 0   | 1     |                                                      |     |      |      |     |     |     |       |                   |
| B*55:54                                                 | 55:54          | HLA07314  |                                               | 0   | 0   | 2    | 0    | 0   | 0   | 0   | 2     |                                                      |     |      |      |     |     |     |       |                   |
| B*55:55N                                                | 55:55N         | HLA07459  |                                               | 0   | 0   | 1    | 0    | 0   | 0   | 0   | 1     |                                                      |     |      |      |     |     |     |       |                   |
| B*55:56                                                 | 55:56          | HLA07710  |                                               | 0   | 0   | 3    | 0    | 0   | 0   | 0   | 3     |                                                      |     |      |      |     |     |     |       |                   |
| B*55:59                                                 | 55:59          | HLA09580  |                                               | 0   | 2   | 0    | 0    | 0   | 0   | 0   | 2     |                                                      |     |      |      |     |     |     |       |                   |
| B*55:60                                                 | 55:60          | HLA10041  |                                               | 0   | 4   | 0    | 0    | 0   | 0   | 0   | 4     |                                                      |     |      |      |     |     |     |       |                   |
| B*55:64                                                 | 55:64          | HLA11431  |                                               | 0   | 0   | 0    | 0    | 2   | 0   | 0   | 2     |                                                      |     |      |      |     |     |     |       |                   |
| B*55:67                                                 | 55:67          | HLA11831  |                                               | 0   | 1   | 0    | 0    | 0   | 0   | 0   | 1     |                                                      |     |      |      |     |     |     |       |                   |
| B*55:69                                                 | 55:69          | HLA12297  |                                               | 0   | 1   | 0    | 0    | 0   | 0   | 0   | 1     |                                                      |     |      |      |     |     |     |       |                   |



| Supplemental Table 9: HLA-B Allele Summary <sup>a</sup> |                        |           | Allele Count by Population Group <sup>b</sup> |            |             |               |             |             |            |             |               | 3.0.0 CIWD Category by Population Group <sup>c</sup> |          |           |          |          |          |          |           |                   |          |
|---------------------------------------------------------|------------------------|-----------|-----------------------------------------------|------------|-------------|---------------|-------------|-------------|------------|-------------|---------------|------------------------------------------------------|----------|-----------|----------|----------|----------|----------|-----------|-------------------|----------|
| Allele                                                  | Genomic typing         | Allele ID | G group                                       | AFA        | API         | EURO          | MENA        | HIS         | NAM        | UNK         | Total         | AFA                                                  | API      | EURO      | MENA     | HIS      | NAM      | UNK      | Total     | Highest Frequency |          |
| B*55:72                                                 | 55:72                  | HLA13179  |                                               | 0          | 1           | 0             | 0           | 0           | 0          | 0           | 1             |                                                      |          |           |          |          |          |          |           |                   |          |
| B*55:73                                                 | 55:73                  | HLA13363  |                                               | 0          | 0           | 1             | 0           | 0           | 0          | 0           | 1             |                                                      |          |           |          |          |          |          |           |                   |          |
| B*55:78                                                 | 55:78                  | HLA14444  |                                               | 0          | 8           | 0             | 0           | 0           | 0          | 0           | 8             |                                                      | WD       |           |          |          |          |          | WD        | WD                |          |
| B*55:CODE                                               | 55:CODE                |           |                                               | 92         | 502         | 11886         | 244         | 531         | 53         | 1504        | 14812         | NA                                                   | NA       | NA        | NA       | NA       | NA       | NA       | NA        | NA                | NA       |
| <b>B*56:01 total</b>                                    | <b>56:01 total</b>     |           |                                               | <b>882</b> | <b>9321</b> | <b>105001</b> | <b>1014</b> | <b>2845</b> | <b>335</b> | <b>7007</b> | <b>126405</b> | <b>C</b>                                             | <b>C</b> | <b>C</b>  | <b>C</b> | <b>C</b> | <b>C</b> | <b>C</b> | <b>C</b>  | <b>C</b>          | <b>C</b> |
| B*56:01                                                 | 56:01                  |           |                                               | 0          | 4           | 449           | 0           | 1           | 0          | 20          | 474           |                                                      |          | I         |          |          |          | I        | I         | I                 |          |
| B*56:01P                                                | 56:01P                 |           |                                               | 0          | 1           | 74            | 0           | 0           | 0          | 0           | 75            |                                                      |          | WD        |          |          |          |          | WD        | WD                |          |
| <b>B*56:01:01G total</b>                                | <b>56:01:01G total</b> |           |                                               | <b>882</b> | <b>9314</b> | <b>104428</b> | <b>1014</b> | <b>2844</b> | <b>335</b> | <b>6987</b> | <b>125804</b> | <b>C</b>                                             | <b>C</b> | <b>C</b>  | <b>C</b> | <b>C</b> | <b>C</b> | <b>C</b> | <b>C</b>  | <b>C</b>          | <b>C</b> |
| B*56:01:01G                                             | 56:01:01G              |           | 56:01:01G                                     | 677        | 8618        | 100793        | 994         | 2021        | 239        | 6283        | 119625        | C                                                    | C        | C         | C        | C        | C        | C        | C         | C                 | C        |
| B*56:01:01                                              | 56:01:01               |           | 56:01:01G                                     | 135        | 416         | 2156          | 9           | 501         | 59         | 453         | 3729          | C                                                    | C        | C         | WD       | C        | C        | C        | C         | C                 | C        |
| B*56:01:01:01                                           | 56:01:01:01            | HLA00376  | 56:01:01G                                     | 0          | 34          | 5             | 0           | 0           | 0          | 4           | 43            |                                                      | I        | WD        |          |          |          |          | WD        | I                 |          |
| B*56:01:01:02                                           | 56:01:01:02            | HLA12582  | 56:01:01G                                     | 49         | 184         | 940           | 7           | 239         | 28         | 168         | 1615          | C                                                    | C        | I         | WD       | C        | C        | C        | C         | C                 | C        |
| B*56:01:01:03                                           | 56:01:01:03            | HLA14086  | 56:01:01G                                     | 21         | 62          | 511           | 4           | 83          | 9          | 78          | 768           | WD                                                   | I        | I         |          | C        | C        | I        | I         | C                 |          |
| B*56:01:01:04                                           | 56:01:01:04            | HLA16261  | 56:01:01G                                     | 0          | 0           | 23            | 0           | 0           | 0          | 1           | 24            |                                                      |          | WD        |          |          |          |          | WD        | WD                |          |
| B*56:01:02                                              | 56:01:02               | HLA04209  |                                               | 0          | 0           | 21            | 0           | 0           | 0          | 0           | 21            |                                                      |          | WD        |          |          |          |          | WD        | WD                |          |
| B*56:01:03                                              | 56:01:03               | HLA04552  |                                               | 0          | 0           | 13            | 0           | 0           | 0          | 0           | 13            |                                                      |          | WD        |          |          |          |          | WD        | WD                |          |
| B*56:01:04                                              | 56:01:04               | HLA04819  |                                               | 0          | 0           | 13            | 0           | 0           | 0          | 0           | 13            |                                                      |          | WD        |          |          |          |          | WD        | WD                |          |
| B*56:01:06                                              | 56:01:06               | HLA09722  |                                               | 0          | 0           | 3             | 0           | 0           | 0          | 0           | 3             |                                                      |          |           |          |          |          |          |           |                   |          |
| B*56:01:07                                              | 56:01:07               | HLA10777  |                                               | 0          | 1           | 0             | 0           | 0           | 0          | 0           | 1             |                                                      |          |           |          |          |          |          |           |                   |          |
| B*56:01:08                                              | 56:01:08               | HLA12296  |                                               | 0          | 1           | 0             | 0           | 0           | 0          | 0           | 1             |                                                      |          |           |          |          |          |          |           |                   |          |
| <b>B*56:02 total</b>                                    | <b>56:02 total</b>     |           |                                               | <b>2</b>   | <b>372</b>  | <b>13</b>     | <b>0</b>    | <b>3</b>    | <b>0</b>   | <b>277</b>  | <b>667</b>    |                                                      | <b>C</b> | <b>WD</b> |          |          |          |          | <b>C</b>  | <b>I</b>          | <b>C</b> |
| B*56:02                                                 | 56:02                  |           |                                               | 2          | 308         | 8             | 0           | 2           | 0          | 220         | 540           |                                                      | C        | WD        |          |          |          |          | C         | I                 | C        |
| B*56:02:01                                              | 56:02:01               | HLA00377  |                                               | 0          | 64          | 5             | 0           | 1           | 0          | 55          | 125           |                                                      | I        | WD        |          |          |          |          | I         | WD                | I        |
| B*56:02:02                                              | 56:02:02               | HLA14399  |                                               | 0          | 0           | 0             | 0           | 0           | 0          | 2           | 2             |                                                      |          |           |          |          |          |          |           |                   |          |
| B*56:03                                                 | 56:03                  | HLA00378  |                                               | 0          | 337         | 8             | 0           | 0           | 0          | 55          | 400           |                                                      | C        | WD        |          |          |          |          | I         | I                 | C        |
| B*56:04                                                 | 56:04                  | HLA00379  |                                               | 1          | 1147        | 45            | 6           | 7           | 1          | 154         | 1361          |                                                      | C        | WD        | WD       | WD       |          |          | C         | I                 | C        |
| <b>B*56:05 total</b>                                    | <b>56:05 total</b>     |           |                                               | <b>0</b>   | <b>16</b>   | <b>0</b>      | <b>0</b>    | <b>0</b>    | <b>0</b>   | <b>1</b>    | <b>17</b>     |                                                      | <b>I</b> |           |          |          |          |          | <b>WD</b> | <b>I</b>          |          |
| B*56:05                                                 | 56:05                  |           |                                               | 0          | 1           | 0             | 0           | 0           | 0          | 0           | 1             |                                                      |          |           |          |          |          |          |           |                   |          |
| B*56:05:01                                              | 56:05:01               | HLA00380  |                                               | 0          | 8           | 0             | 0           | 0           | 0          | 0           | 8             |                                                      | WD       |           |          |          |          |          |           | WD                | WD       |
| B*56:05:02                                              | 56:05:02               | HLA01719  |                                               | 0          | 7           | 0             | 0           | 0           | 0          | 1           | 8             |                                                      | WD       |           |          |          |          |          |           | WD                | WD       |
| B*56:06                                                 | 56:06                  | HLA00988  |                                               | 0          | 0           | 1             | 0           | 1           | 0          | 0           | 2             |                                                      |          |           |          |          |          |          |           |                   |          |

| Supplemental Table 9: HLA-B Allele Summary <sup>a</sup> |                    |           | Allele Count by Population Group <sup>b</sup> |             |              |               |             |             |             |              |               | 3.0.0 CIWD Category by Population Group <sup>c</sup> |          |          |          |          |          |          |          |                   |
|---------------------------------------------------------|--------------------|-----------|-----------------------------------------------|-------------|--------------|---------------|-------------|-------------|-------------|--------------|---------------|------------------------------------------------------|----------|----------|----------|----------|----------|----------|----------|-------------------|
| Allele                                                  | Genomic typing     | Allele ID | G group                                       | AFA         | API          | EURO          | MENA        | HIS         | NAM         | UNK          | Total         | AFA                                                  | API      | EURO     | MENA     | HIS      | NAM      | UNK      | Total    | Highest Frequency |
| B*56:07                                                 | 56:07              | HLA00989  |                                               | 0           | 6            | 1             | 0           | 0           | 0           | 1            | 8             |                                                      | WD       |          |          |          |          |          | WD       | WD                |
| B*56:09                                                 | 56:09              | HLA01625  |                                               | 0           | 1            | 0             | 0           | 0           | 0           | 0            | 1             |                                                      |          |          |          |          |          |          |          |                   |
| B*56:10                                                 | 56:10              | HLA01658  |                                               | 0           | 32           | 0             | 0           | 0           | 0           | 2            | 34            |                                                      | I        |          |          |          |          |          | WD       | I                 |
| B*56:11                                                 | 56:11              | HLA01688  |                                               | 0           | 2            | 0             | 2           | 0           | 0           | 0            | 4             |                                                      |          |          |          |          |          |          |          |                   |
| B*56:13                                                 | 56:13              | HLA01892  |                                               | 0           | 0            | 5             | 0           | 2           | 0           | 3            | 10            |                                                      |          | WD       |          |          |          |          | WD       | WD                |
| B*56:14                                                 | 56:14              | HLA02002  |                                               | 0           | 1            | 0             | 0           | 0           | 0           | 0            | 1             |                                                      |          |          |          |          |          |          |          |                   |
| B*56:15                                                 | 56:15              | HLA02043  |                                               | 1           | 0            | 24            | 0           | 7           | 2           | 0            | 34            |                                                      |          | WD       |          | WD       |          |          | WD       | WD                |
| B*56:16                                                 | 56:16              | HLA02261  |                                               | 1           | 0            | 43            | 0           | 0           | 1           | 4            | 49            |                                                      |          | WD       |          |          |          |          | WD       | WD                |
| B*56:17                                                 | 56:17              | HLA02565  |                                               | 0           | 0            | 0             | 0           | 1           | 0           | 1            | 2             |                                                      |          |          |          |          |          |          |          |                   |
| <b>B*56:20 total</b>                                    | <b>56:20 total</b> |           |                                               | <b>0</b>    | <b>0</b>     | <b>3</b>      | <b>0</b>    | <b>0</b>    | <b>0</b>    | <b>1</b>     | <b>4</b>      |                                                      |          |          |          |          |          |          |          |                   |
| B*56:20                                                 | 56:20              |           |                                               | 0           | 0            | 2             | 0           | 0           | 0           | 1            | 3             |                                                      |          |          |          |          |          |          |          |                   |
| B*56:20:01                                              | 56:20:01           | HLA02852  |                                               | 0           | 0            | 1             | 0           | 0           | 0           | 0            | 1             |                                                      |          |          |          |          |          |          |          |                   |
| B*56:21                                                 | 56:21              | HLA03085  |                                               | 0           | 0            | 1             | 0           | 0           | 0           | 0            | 1             |                                                      |          |          |          |          |          |          |          |                   |
| B*56:22                                                 | 56:22              | HLA03266  |                                               | 0           | 13           | 0             | 0           | 0           | 0           | 0            | 13            |                                                      | I        |          |          |          |          |          | WD       | I                 |
| B*56:25                                                 | 56:25              | HLA04077  |                                               | 0           | 1            | 35            | 0           | 0           | 0           | 3            | 39            |                                                      |          | WD       |          |          |          |          | WD       | WD                |
| B*56:26                                                 | 56:26              | HLA04024  |                                               | 0           | 0            | 1             | 0           | 1           | 0           | 0            | 2             |                                                      |          |          |          |          |          |          |          |                   |
| B*56:27                                                 | 56:27              | HLA04555  |                                               | 0           | 1            | 58            | 0           | 2           | 0           | 3            | 64            |                                                      |          | WD       |          |          |          |          | WD       | WD                |
| B*56:29                                                 | 56:29              | HLA04806  |                                               | 0           | 0            | 1             | 0           | 0           | 0           | 0            | 1             |                                                      |          |          |          |          |          |          |          |                   |
| B*56:31                                                 | 56:31              | HLA06060  |                                               | 0           | 0            | 3             | 0           | 0           | 0           | 0            | 3             |                                                      |          |          |          |          |          |          |          |                   |
| B*56:33                                                 | 56:33              | HLA07460  |                                               | 0           | 0            | 9             | 0           | 0           | 0           | 0            | 9             |                                                      |          | WD       |          |          |          |          | WD       | WD                |
| B*56:34                                                 | 56:34              | HLA07711  |                                               | 0           | 1            | 0             | 1           | 0           | 0           | 0            | 2             |                                                      |          |          |          |          |          |          |          |                   |
| B*56:36                                                 | 56:36              | HLA08059  |                                               | 0           | 0            | 1             | 0           | 0           | 0           | 0            | 1             |                                                      |          |          |          |          |          |          |          |                   |
| B*56:37                                                 | 56:37              | HLA08516  |                                               | 0           | 0            | 4             | 0           | 0           | 0           | 0            | 4             |                                                      |          |          |          |          |          |          |          |                   |
| B*56:39                                                 | 56:39              | HLA08999  |                                               | 0           | 0            | 2             | 0           | 0           | 0           | 0            | 2             |                                                      |          |          |          |          |          |          |          |                   |
| B*56:41                                                 | 56:41              | HLA09579  |                                               | 0           | 0            | 4             | 0           | 0           | 0           | 0            | 4             |                                                      |          |          |          |          |          |          |          |                   |
| B*56:44                                                 | 56:44              | HLA11832  |                                               | 0           | 0            | 1             | 0           | 0           | 0           | 0            | 1             |                                                      |          |          |          |          |          |          |          |                   |
| B*56:45                                                 | 56:45              | HLA12756  |                                               | 0           | 0            | 1             | 0           | 0           | 0           | 0            | 1             |                                                      |          |          |          |          |          |          |          |                   |
| B*56:46                                                 | 56:46              | HLA13006  |                                               | 0           | 1            | 0             | 0           | 0           | 0           | 0            | 1             |                                                      |          |          |          |          |          |          |          |                   |
| B*56:CODE                                               | 56:CODE            |           |                                               | 35          | 122          | 4451          | 20          | 201         | 15          | 403          | 5247          | NA                                                   | NA       | NA       | NA       | NA       | NA       | NA       | NA       | NA                |
| <b>B*57:01 total</b>                                    | <b>57:01 total</b> |           |                                               | <b>2476</b> | <b>63284</b> | <b>389284</b> | <b>5266</b> | <b>9547</b> | <b>1016</b> | <b>34365</b> | <b>505238</b> | <b>C</b>                                             | <b>C</b> | <b>C</b> | <b>C</b> | <b>C</b> | <b>C</b> | <b>C</b> | <b>C</b> | <b>C</b>          |
| B*57:01                                                 | 57:01              |           |                                               | 3           | 6            | 1597          | 2           | 4           | 0           | 80           | 1692          |                                                      | WD       | C        |          |          |          |          | I        | C                 |

| Supplemental Table 9: HLA-B Allele Summary <sup>a</sup> |                        |           | Allele Count by Population Group <sup>b</sup> |              |              |               |             |             |             |              |               | 3.0.0 CIWD Category by Population Group <sup>c</sup> |          |          |          |          |          |          |          |                   |
|---------------------------------------------------------|------------------------|-----------|-----------------------------------------------|--------------|--------------|---------------|-------------|-------------|-------------|--------------|---------------|------------------------------------------------------|----------|----------|----------|----------|----------|----------|----------|-------------------|
| Allele                                                  | Genomic typing         | Allele ID | G group                                       | AFA          | API          | EURO          | MENA        | HIS         | NAM         | UNK          | Total         | AFA                                                  | API      | EURO     | MENA     | HIS      | NAM      | UNK      | Total    | Highest Frequency |
| B*57:01P                                                | 57:01P                 |           |                                               | 0            | 3            | 327           | 0           | 0           | 0           | 2            | 332           |                                                      |          | I        |          |          |          |          | I        | I                 |
| <b>B*57:01:01G total</b>                                | <b>57:01:01G total</b> |           |                                               | <b>2473</b>  | <b>63272</b> | <b>387265</b> | <b>5132</b> | <b>9541</b> | <b>1016</b> | <b>34280</b> | <b>502979</b> | <b>C</b>                                             | <b>C</b> | <b>C</b> | <b>C</b> | <b>C</b> | <b>C</b> | <b>C</b> | <b>C</b> | <b>C</b>          |
| B*57:01:01G                                             | 57:01:01G              |           | 57:01:01G                                     | 1956         | 57485        | 360426        | 4838        | 6802        | 770         | 30655        | 462932        | C                                                    | C        | C        | C        | C        | C        | C        | C        | C                 |
| B*57:01:01                                              | 57:01:01               |           | 57:01:01G                                     | 517          | 5787         | 26833         | 294         | 2739        | 246         | 3624         | 40040         | C                                                    | C        | C        | C        | C        | C        | C        | C        | C                 |
| B*57:01:01:01                                           | 57:01:01:01            | HLA00381  | 57:01:01G                                     | 0            | 0            | 4             | 0           | 0           | 0           | 1            | 5             |                                                      |          |          |          |          |          |          | WD       | WD                |
| B*57:79N                                                | 57:79N                 | HLA13633  | 57:01:01G                                     | 0            | 0            | 2             | 0           | 0           | 0           | 0            | 2             |                                                      |          |          |          |          |          |          |          |                   |
| B*57:01:02                                              | 57:01:02               | HLA01520  |                                               | 0            | 0            | 65            | 3           | 0           | 0           | 1            | 69            |                                                      |          | WD       |          |          |          |          | WD       | WD                |
| B*57:01:04                                              | 57:01:04               | HLA03969  |                                               | 0            | 0            | 3             | 0           | 0           | 0           | 1            | 4             |                                                      |          |          |          |          |          |          |          |                   |
| B*57:01:06                                              | 57:01:06               | HLA04456  |                                               | 0            | 0            | 5             | 0           | 0           | 0           | 0            | 5             |                                                      |          | WD       |          |          |          |          | WD       | WD                |
| B*57:01:07                                              | 57:01:07               | HLA04755  |                                               | 0            | 2            | 2             | 129         | 0           | 0           | 1            | 134           |                                                      |          |          | C        |          |          |          | WD       | C                 |
| B*57:01:08                                              | 57:01:08               | HLA05320  |                                               | 0            | 0            | 4             | 0           | 0           | 0           | 0            | 4             |                                                      |          |          |          |          |          |          |          |                   |
| B*57:01:10                                              | 57:01:10               | HLA05563  |                                               | 0            | 0            | 12            | 0           | 0           | 0           | 0            | 12            |                                                      |          | WD       |          |          |          |          | WD       | WD                |
| B*57:01:14                                              | 57:01:14               | HLA08370  |                                               | 0            | 0            | 4             | 0           | 0           | 0           | 0            | 4             |                                                      |          |          |          |          |          |          |          |                   |
| B*57:01:15                                              | 57:01:15               | HLA09723  |                                               | 0            | 0            | 0             | 0           | 1           | 0           | 0            | 1             |                                                      |          |          |          |          |          |          |          |                   |
| B*57:01:18                                              | 57:01:18               | HLA11430  |                                               | 0            | 1            | 1             | 0           | 1           | 0           | 0            | 3             |                                                      |          |          |          |          |          |          |          |                   |
| B*57:01:20                                              | 57:01:20               | HLA12568  |                                               | 0            | 0            | 1             | 0           | 0           | 0           | 0            | 1             |                                                      |          |          |          |          |          |          |          |                   |
| <b>B*57:02 total</b>                                    | <b>57:02 total</b>     |           |                                               | <b>2064</b>  | <b>45</b>    | <b>3167</b>   | <b>497</b>  | <b>515</b>  | <b>79</b>   | <b>811</b>   | <b>7178</b>   | <b>C</b>                                             | <b>I</b> | <b>C</b> | <b>C</b> | <b>C</b> | <b>C</b> | <b>C</b> | <b>C</b> | <b>C</b>          |
| B*57:02                                                 | 57:02                  |           |                                               | 87           | 3            | 236           | 38          | 51          | 6           | 37           | 458           | C                                                    |          | I        | WD       | I        | WD       | I        | I        | C                 |
| B*57:02P                                                | 57:02P                 |           |                                               | 0            | 0            | 2             | 0           | 0           | 0           | 0            | 2             |                                                      |          |          |          |          |          |          |          |                   |
| B*57:02:01                                              | 57:02:01               | HLA00382  |                                               | 1969         | 42           | 2929          | 459         | 464         | 73          | 770          | 6706          | C                                                    | I        | C        | C        | C        | C        | C        | C        | C                 |
| B*57:02:02                                              | 57:02:02               | HLA04435  |                                               | 8            | 0            | 0             | 0           | 0           | 0           | 4            | 12            | WD                                                   |          |          |          |          |          |          | WD       | WD                |
| <b>B*57:03 total</b>                                    | <b>57:03 total</b>     |           |                                               | <b>11979</b> | <b>217</b>   | <b>8352</b>   | <b>933</b>  | <b>4334</b> | <b>909</b>  | <b>4344</b>  | <b>31068</b>  | <b>C</b>                                             | <b>C</b> | <b>C</b> | <b>C</b> | <b>C</b> | <b>C</b> | <b>C</b> | <b>C</b> | <b>C</b>          |
| B*57:03                                                 | 57:03                  |           |                                               | 784          | 2            | 530           | 47          | 488         | 76          | 226          | 2153          | C                                                    |          | I        | C        | C        | C        | C        | C        | C                 |
| B*57:03P                                                | 57:03P                 |           |                                               | 1            | 0            | 4             | 0           | 0           | 0           | 0            | 5             |                                                      |          |          |          |          |          |          | WD       | WD                |
| <b>B*57:03:01G total</b>                                | <b>57:03:01G total</b> |           |                                               | <b>11194</b> | <b>215</b>   | <b>7816</b>   | <b>884</b>  | <b>3846</b> | <b>833</b>  | <b>4118</b>  | <b>28906</b>  | <b>C</b>                                             | <b>C</b> | <b>C</b> | <b>C</b> | <b>C</b> | <b>C</b> | <b>C</b> | <b>C</b> | <b>C</b>          |
| B*57:03:01G                                             | 57:03:01G              |           | 57:03:01G                                     | 712          | 80           | 1811          | 57          | 250         | 3           | 509          | 3422          | C                                                    | I        | C        | C        | C        |          |          | C        | C                 |
| B*57:03:01                                              | 57:03:01               |           | 57:03:01G                                     | 9374         | 118          | 5697          | 802         | 2925        | 670         | 3273         | 22859         | C                                                    | I        | C        | C        | C        | C        | C        | C        | C                 |
| B*57:03:01:01                                           | 57:03:01:01            | HLA00383  | 57:03:01G                                     | 565          | 0            | 9             | 2           | 73          | 16          | 109          | 774           | C                                                    |          | WD       |          | C        | C        | I        | I        | C                 |
| B*57:03:01:02                                           | 57:03:01:02            | HLA14808  | 57:03:01G                                     | 543          | 17           | 299           | 23          | 598         | 144         | 227          | 1851          | C                                                    | I        | I        | WD       | C        | C        | C        | C        | C                 |
| B*57:03:02                                              | 57:03:02               | HLA01289  |                                               | 0            | 0            | 1             | 2           | 0           | 0           | 0            | 3             |                                                      |          |          |          |          |          |          |          |                   |
| B*57:03:03                                              | 57:03:03               | HLA16226  |                                               | 0            | 0            | 1             | 0           | 0           | 0           | 0            | 1             |                                                      |          |          |          |          |          |          |          |                   |

| Supplemental Table 9: HLA-B Allele Summary <sup>a</sup> |                    |           | Allele Count by Population Group <sup>b</sup> |            |          |           |          |           |          |            |            | 3.0.0 CIWD Category by Population Group <sup>c</sup> |     |           |      |          |           |          |           |                   |
|---------------------------------------------------------|--------------------|-----------|-----------------------------------------------|------------|----------|-----------|----------|-----------|----------|------------|------------|------------------------------------------------------|-----|-----------|------|----------|-----------|----------|-----------|-------------------|
| Allele                                                  | Genomic typing     | Allele ID | G group                                       | AFA        | API      | EURO      | MENA     | HIS       | NAM      | UNK        | Total      | AFA                                                  | API | EURO      | MENA | HIS      | NAM       | UNK      | Total     | Highest Frequency |
| <b>B*57:04 total</b>                                    | <b>57:04 total</b> |           |                                               | <b>725</b> | <b>3</b> | <b>31</b> | <b>2</b> | <b>35</b> | <b>6</b> | <b>158</b> | <b>960</b> | <b>C</b>                                             |     | <b>WD</b> |      | <b>I</b> | <b>WD</b> | <b>C</b> | <b>I</b>  | <b>C</b>          |
| B*57:04                                                 | 57:04              |           |                                               | 597        | 3        | 17        | 2        | 26        | 5        | 121        | 771        | C                                                    |     | WD        |      | I        | WD        | I        | I         | C                 |
| B*57:04P                                                | 57:04P             |           |                                               | 0          | 0        | 0         | 0        | 1         | 0        | 0          | 1          |                                                      |     |           |      |          |           |          |           |                   |
| B*57:04:01                                              | 57:04:01           | HLA00384  |                                               | 128        | 0        | 14        | 0        | 8         | 1        | 37         | 188        | C                                                    |     | WD        |      | I        |           | I        | I         | C                 |
| B*57:05                                                 | 57:05              | HLA00385  |                                               | 13         | 0        | 0         | 0        | 0         | 0        | 3          | 16         | WD                                                   |     |           |      |          |           |          | WD        | WD                |
| B*57:07                                                 | 57:07              | HLA01192  |                                               | 1          | 0        | 0         | 0        | 0         | 0        | 0          | 1          |                                                      |     |           |      |          |           |          |           |                   |
| B*57:09                                                 | 57:09              | HLA01485  |                                               | 10         | 0        | 0         | 0        | 0         | 0        | 1          | 11         | WD                                                   |     |           |      |          |           |          | WD        | WD                |
| B*57:11                                                 | 57:11              | HLA02676  |                                               | 1          | 4        | 4         | 0        | 0         | 0        | 1          | 10         |                                                      |     |           |      |          |           |          | WD        | WD                |
| B*57:12                                                 | 57:12              | HLA02888  |                                               | 4          | 0        | 0         | 0        | 0         | 0        | 0          | 4          |                                                      |     |           |      |          |           |          |           |                   |
| B*57:13                                                 | 57:13              | HLA02966  |                                               | 0          | 0        | 1         | 0        | 0         | 0        | 0          | 1          |                                                      |     |           |      |          |           |          |           |                   |
| <b>B*57:14 total</b>                                    | <b>57:14 total</b> |           |                                               | <b>0</b>   | <b>0</b> | <b>19</b> | <b>0</b> | <b>0</b>  | <b>0</b> | <b>0</b>   | <b>19</b>  |                                                      |     | <b>WD</b> |      |          |           |          | <b>WD</b> | <b>WD</b>         |
| B*57:14                                                 | 57:14              |           |                                               | 0          | 0        | 6         | 0        | 0         | 0        | 0          | 6          |                                                      |     | WD        |      |          |           |          | WD        | WD                |
| B*57:14:01                                              | 57:14:01           | HLA03129  |                                               | 0          | 0        | 13        | 0        | 0         | 0        | 0          | 13         |                                                      |     | WD        |      |          |           |          | WD        | WD                |
| B*57:15                                                 | 57:15              | HLA03147  |                                               | 0          | 1        | 16        | 0        | 0         | 0        | 1          | 18         |                                                      |     | WD        |      |          |           |          | WD        | WD                |
| B*57:16                                                 | 57:16              | HLA03150  |                                               | 0          | 0        | 3         | 0        | 0         | 0        | 0          | 3          |                                                      |     |           |      |          |           |          |           |                   |
| B*57:17                                                 | 57:17              | HLA03320  |                                               | 1          | 0        | 0         | 0        | 0         | 0        | 0          | 1          |                                                      |     |           |      |          |           |          |           |                   |
| B*57:18                                                 | 57:18              | HLA03506  |                                               | 0          | 1        | 0         | 0        | 0         | 0        | 0          | 1          |                                                      |     |           |      |          |           |          |           |                   |
| B*57:19                                                 | 57:19              | HLA03507  |                                               | 0          | 0        | 1         | 0        | 0         | 0        | 1          | 2          |                                                      |     |           |      |          |           |          |           |                   |
| B*57:20                                                 | 57:20              | HLA03666  |                                               | 0          | 0        | 1         | 0        | 0         | 0        | 0          | 1          |                                                      |     |           |      |          |           |          |           |                   |
| B*57:21                                                 | 57:21              | HLA03675  |                                               | 0          | 0        | 12        | 0        | 0         | 0        | 0          | 12         |                                                      |     | WD        |      |          |           |          | WD        | WD                |
| B*57:22                                                 | 57:22              | HLA03904  |                                               | 0          | 5        | 0         | 0        | 0         | 0        | 0          | 5          |                                                      | WD  |           |      |          |           |          | WD        | WD                |
| B*57:23                                                 | 57:23              | HLA04046  |                                               | 0          | 0        | 9         | 0        | 0         | 0        | 0          | 9          |                                                      |     | WD        |      |          |           |          | WD        | WD                |
| B*57:24                                                 | 57:24              | HLA03984  |                                               | 0          | 0        | 18        | 0        | 0         | 0        | 0          | 18         |                                                      |     | WD        |      |          |           |          | WD        | WD                |
| B*57:26                                                 | 57:26              | HLA04203  |                                               | 0          | 1        | 9         | 0        | 0         | 0        | 0          | 10         |                                                      |     | WD        |      |          |           |          | WD        | WD                |
| B*57:27                                                 | 57:27              | HLA04452  |                                               | 0          | 0        | 0         | 0        | 1         | 0        | 0          | 1          |                                                      |     |           |      |          |           |          |           |                   |
| B*57:31                                                 | 57:31              | HLA04848  |                                               | 0          | 0        | 2         | 0        | 0         | 0        | 0          | 2          |                                                      |     |           |      |          |           |          |           |                   |
| B*57:32                                                 | 57:32              | HLA05424  |                                               | 0          | 0        | 6         | 0        | 0         | 0        | 0          | 6          |                                                      |     | WD        |      |          |           |          | WD        | WD                |
| B*57:34                                                 | 57:34              | HLA05503  |                                               | 0          | 0        | 8         | 0        | 0         | 0        | 0          | 8          |                                                      |     | WD        |      |          |           |          | WD        | WD                |
| B*57:35                                                 | 57:35              | HLA05513  |                                               | 0          | 0        | 1         | 0        | 0         | 0        | 0          | 1          |                                                      |     |           |      |          |           |          |           |                   |
| B*57:38                                                 | 57:38              | HLA05958  |                                               | 0          | 0        | 1         | 0        | 0         | 0        | 0          | 1          |                                                      |     |           |      |          |           |          |           |                   |
| B*57:39                                                 | 57:39              | HLA06229  |                                               | 0          | 0        | 0         | 2        | 0         | 0        | 0          | 2          |                                                      |     |           |      |          |           |          |           |                   |

| Supplemental Table 9: HLA-B Allele Summary <sup>a</sup> |                    |           | Allele Count by Population Group <sup>b</sup> |          |          |          |          |          |          |          |          | 3.0.0 CIWD Category by Population Group <sup>c</sup> |     |      |      |     |     |     |       |                   |
|---------------------------------------------------------|--------------------|-----------|-----------------------------------------------|----------|----------|----------|----------|----------|----------|----------|----------|------------------------------------------------------|-----|------|------|-----|-----|-----|-------|-------------------|
| Allele                                                  | Genomic typing     | Allele ID | G group                                       | AFA      | API      | EURO     | MENA     | HIS      | NAM      | UNK      | Total    | AFA                                                  | API | EURO | MENA | HIS | NAM | UNK | Total | Highest Frequency |
| B*57:40                                                 | 57:40              | HLA06240  |                                               | 0        | 0        | 17       | 0        | 0        | 0        | 0        | 17       |                                                      |     | WD   |      |     |     |     | WD    | WD                |
| B*57:41                                                 | 57:41              | HLA06241  |                                               | 0        | 0        | 1        | 0        | 0        | 0        | 1        | 2        |                                                      |     |      |      |     |     |     |       |                   |
| B*57:42                                                 | 57:42              | HLA06249  |                                               | 3        | 0        | 0        | 0        | 0        | 0        | 0        | 3        |                                                      |     |      |      |     |     |     |       |                   |
| B*57:43                                                 | 57:43              | HLA06250  |                                               | 0        | 2        | 0        | 0        | 0        | 0        | 1        | 3        |                                                      |     |      |      |     |     |     |       |                   |
| B*57:44                                                 | 57:44              | HLA06315  |                                               | 0        | 0        | 5        | 0        | 0        | 0        | 0        | 5        |                                                      |     | WD   |      |     |     |     | WD    | WD                |
| B*57:45                                                 | 57:45              | HLA06683  |                                               | 0        | 0        | 1        | 0        | 0        | 0        | 0        | 1        |                                                      |     |      |      |     |     |     |       |                   |
| B*57:47                                                 | 57:47              | HLA06700  |                                               | 0        | 0        | 0        | 0        | 0        | 0        | 1        | 1        |                                                      |     |      |      |     |     |     |       |                   |
| B*57:48                                                 | 57:48              | HLA06883  |                                               | 0        | 0        | 5        | 0        | 0        | 0        | 0        | 5        |                                                      |     | WD   |      |     |     |     | WD    | WD                |
| B*57:49                                                 | 57:49              | HLA06942  |                                               | 0        | 1        | 1        | 0        | 0        | 0        | 0        | 2        |                                                      |     |      |      |     |     |     |       |                   |
| B*57:52                                                 | 57:52              | HLA06989  |                                               | 0        | 0        | 4        | 0        | 0        | 0        | 0        | 4        |                                                      |     |      |      |     |     |     |       |                   |
| B*57:54                                                 | 57:54              | HLA07456  |                                               | 0        | 0        | 4        | 0        | 0        | 0        | 0        | 4        |                                                      |     |      |      |     |     |     |       |                   |
| B*57:56                                                 | 57:56              | HLA07708  |                                               | 0        | 0        | 1        | 0        | 0        | 0        | 0        | 1        |                                                      |     |      |      |     |     |     |       |                   |
| B*57:58                                                 | 57:58              | HLA08073  |                                               | 0        | 0        | 4        | 0        | 0        | 0        | 1        | 5        |                                                      |     |      |      |     |     |     | WD    | WD                |
| B*57:60                                                 | 57:60              | HLA08371  |                                               | 0        | 0        | 1        | 0        | 0        | 0        | 0        | 1        |                                                      |     |      |      |     |     |     |       |                   |
| B*57:61                                                 | 57:61              | HLA08927  |                                               | 0        | 14       | 0        | 1        | 0        | 0        | 0        | 15       |                                                      | I   |      |      |     |     |     | WD    | I                 |
| B*57:62                                                 | 57:62              | HLA08997  |                                               | 0        | 0        | 1        | 0        | 0        | 0        | 0        | 1        |                                                      |     |      |      |     |     |     |       |                   |
| B*57:63                                                 | 57:63              | HLA09303  |                                               | 0        | 0        | 0        | 0        | 1        | 0        | 0        | 1        |                                                      |     |      |      |     |     |     |       |                   |
| B*57:65                                                 | 57:65              | HLA09577  |                                               | 0        | 0        | 1        | 0        | 0        | 0        | 0        | 1        |                                                      |     |      |      |     |     |     |       |                   |
| <b>B*57:67 total</b>                                    | <b>57:67 total</b> |           |                                               | <b>0</b> | <b>0</b> | <b>0</b> | <b>0</b> | <b>0</b> | <b>0</b> | <b>1</b> | <b>1</b> |                                                      |     |      |      |     |     |     |       |                   |
| B*57:67:02                                              | 57:67:02           | HLA14152  |                                               | 0        | 0        | 0        | 0        | 0        | 0        | 1        | 1        |                                                      |     |      |      |     |     |     |       |                   |
| B*57:69                                                 | 57:69              | HLA10408  |                                               | 0        | 0        | 0        | 0        | 0        | 0        | 1        | 1        |                                                      |     |      |      |     |     |     |       |                   |
| B*57:70                                                 | 57:70              | HLA11328  |                                               | 0        | 0        | 0        | 1        | 0        | 0        | 0        | 1        |                                                      |     |      |      |     |     |     |       |                   |
| B*57:73                                                 | 57:73              | HLA12263  |                                               | 0        | 2        | 0        | 0        | 0        | 0        | 0        | 2        |                                                      |     |      |      |     |     |     |       |                   |
| B*57:75                                                 | 57:75              | HLA13002  |                                               | 0        | 0        | 0        | 1        | 0        | 0        | 0        | 1        |                                                      |     |      |      |     |     |     |       |                   |
| B*57:76                                                 | 57:76              | HLA13004  |                                               | 0        | 0        | 1        | 0        | 0        | 0        | 0        | 1        |                                                      |     |      |      |     |     |     |       |                   |
| B*57:77                                                 | 57:77              | HLA13480  |                                               | 0        | 3        | 0        | 0        | 0        | 0        | 0        | 3        |                                                      |     |      |      |     |     |     |       |                   |
| B*57:78                                                 | 57:78              | HLA13379  |                                               | 0        | 0        | 0        | 1        | 0        | 0        | 0        | 1        |                                                      |     |      |      |     |     |     |       |                   |
| B*57:81                                                 | 57:81              | HLA14308  |                                               | 0        | 0        | 3        | 0        | 0        | 0        | 0        | 3        |                                                      |     |      |      |     |     |     |       |                   |
| B*57:83                                                 | 57:83              | HLA14682  |                                               | 0        | 0        | 1        | 0        | 0        | 0        | 0        | 1        |                                                      |     |      |      |     |     |     |       |                   |
| B*57:86                                                 | 57:86              | HLA16223  |                                               | 0        | 0        | 2        | 0        | 0        | 0        | 0        | 2        |                                                      |     |      |      |     |     |     |       |                   |
| B*57:CODE                                               | 57:CODE            |           |                                               | 785      | 640      | 19233    | 163      | 1226     | 155      | 2274     | 24476    | NA                                                   | NA  | NA   | NA   | NA  | NA  | NA  | NA    | NA                |

| Supplemental Table 9: HLA-B Allele Summary <sup>a</sup> |                        |           | Allele Count by Population Group <sup>b</sup> |              |              |              |             |             |             |              |               | 3.0.0 CIWD Category by Population Group <sup>c</sup> |           |          |          |          |          |          |           |                   |
|---------------------------------------------------------|------------------------|-----------|-----------------------------------------------|--------------|--------------|--------------|-------------|-------------|-------------|--------------|---------------|------------------------------------------------------|-----------|----------|----------|----------|----------|----------|-----------|-------------------|
| Allele                                                  | Genomic typing         | Allele ID | G group                                       | AFA          | API          | EURO         | MENA        | HIS         | NAM         | UNK          | Total         | AFA                                                  | API       | EURO     | MENA     | HIS      | NAM      | UNK      | Total     | Highest Frequency |
| <b>B*58:01 total</b>                                    | <b>58:01 total</b>     |           |                                               | <b>13885</b> | <b>63823</b> | <b>85923</b> | <b>7426</b> | <b>7695</b> | <b>1019</b> | <b>17460</b> | <b>197231</b> | <b>C</b>                                             | <b>C</b>  | <b>C</b> | <b>C</b> | <b>C</b> | <b>C</b> | <b>C</b> | <b>C</b>  | <b>C</b>          |
| B*58:01                                                 | 58:01                  |           |                                               | 6            | 8            | 854          | 5           | 5           | 0           | 65           | 943           | WD                                                   | WD        | I        | WD       | WD       |          | I        | I         | I                 |
| B*58:01P                                                | 58:01P                 |           |                                               | 4            | 1            | 245          | 3           | 2           | 0           | 2            | 257           |                                                      |           | I        |          |          |          |          | I         | I                 |
| <b>B*58:01:01G total</b>                                | <b>58:01:01G total</b> |           |                                               | <b>13875</b> | <b>63813</b> | <b>84822</b> | <b>7416</b> | <b>7688</b> | <b>1019</b> | <b>17393</b> | <b>196026</b> | <b>C</b>                                             | <b>C</b>  | <b>C</b> | <b>C</b> | <b>C</b> | <b>C</b> | <b>C</b> | <b>C</b>  | <b>C</b>          |
| B*58:01:01G                                             | 58:01:01G              |           | 58:01:01G                                     | 10911        | 57011        | 80561        | 7169        | 5591        | 725         | 15269        | 177237        | C                                                    | C         | C        | C        | C        | C        | C        | C         | C                 |
| B*58:01:01                                              | 58:01:01               |           | 58:01:01G                                     | 1776         | 4331         | 2329         | 157         | 1285        | 147         | 1365         | 11390         | C                                                    | C         | C        | C        | C        | C        | C        | C         | C                 |
| B*58:01:01:01                                           | 58:01:01:01            | HLA00386  | 58:01:01G                                     | 1156         | 2403         | 1883         | 89          | 804         | 145         | 725          | 7205          | C                                                    | C         | C        | C        | C        | C        | C        | C         | C                 |
| B*58:01:01:03                                           | 58:01:01:03            | HLA16308  | 58:01:01G                                     | 0            | 0            | 9            | 0           | 0           | 0           | 0            | 9             |                                                      |           | WD       |          |          |          |          | WD        | WD                |
| B*58:01:01:04                                           | 58:01:01:04            | HLA16752  | 58:01:01G                                     | 2            | 2            | 40           | 1           | 7           | 1           | 10           | 63            |                                                      |           | WD       |          | WD       |          | WD       | WD        | WD                |
| B*58:01:06                                              | 58:01:06               | HLA05370  | 58:01:01G                                     | 0            | 66           | 0            | 0           | 0           | 0           | 15           | 81            |                                                      | I         |          |          |          |          | I        | WD        | I                 |
| B*58:11                                                 | 58:11                  | HLA02201  | 58:01:01G                                     | 30           | 0            | 0            | 0           | 1           | 1           | 9            | 41            | WD                                                   |           |          |          |          |          | WD       | WD        | WD                |
| B*58:01:05                                              | 58:01:05               | HLA05298  |                                               | 0            | 0            | 0            | 1           | 0           | 0           | 0            | 1             |                                                      |           |          |          |          |          |          |           |                   |
| B*58:01:10                                              | 58:01:10               | HLA07647  |                                               | 0            | 1            | 0            | 0           | 0           | 0           | 0            | 1             |                                                      |           |          |          |          |          |          |           |                   |
| B*58:01:11                                              | 58:01:11               | HLA07648  |                                               | 0            | 0            | 1            | 0           | 0           | 0           | 0            | 1             |                                                      |           |          |          |          |          |          |           |                   |
| B*58:01:14                                              | 58:01:14               | HLA09896  |                                               | 0            | 0            | 1            | 0           | 0           | 0           | 0            | 1             |                                                      |           |          |          |          |          |          |           |                   |
| B*58:01:16                                              | 58:01:16               | HLA12481  |                                               | 0            | 0            | 0            | 1           | 0           | 0           | 0            | 1             |                                                      |           |          |          |          |          |          |           |                   |
| <b>B*58:02 total</b>                                    | <b>58:02 total</b>     |           |                                               | <b>14181</b> | <b>71</b>    | <b>940</b>   | <b>610</b>  | <b>2115</b> | <b>368</b>  | <b>3584</b>  | <b>21869</b>  | <b>C</b>                                             | <b>I</b>  | <b>I</b> | <b>C</b> | <b>C</b> | <b>C</b> | <b>C</b> | <b>C</b>  | <b>C</b>          |
| B*58:02                                                 | 58:02                  |           |                                               | 11333        | 49           | 635          | 580         | 1612        | 305         | 2666         | 17180         | C                                                    | I         | I        | C        | C        | C        | C        | C         | C                 |
| B*58:02P                                                | 58:02P                 |           |                                               | 0            | 0            | 0            | 0           | 1           | 0           | 0            | 1             |                                                      |           |          |          |          |          |          |           |                   |
| B*58:02:01                                              | 58:02:01               | HLA00387  |                                               | 2847         | 22           | 305          | 30          | 502         | 63          | 918          | 4687          | C                                                    | I         | I        | WD       | C        | C        | C        | C         | C                 |
| B*58:02:02                                              | 58:02:02               | HLA14456  |                                               | 1            | 0            | 0            | 0           | 0           | 0           | 0            | 1             |                                                      |           |          |          |          |          |          |           |                   |
| B*58:04                                                 | 58:04                  | HLA01142  |                                               | 5            | 0            | 2            | 0           | 0           | 0           | 1            | 8             | WD                                                   |           |          |          |          |          |          | WD        | WD                |
| B*58:05                                                 | 58:05                  | HLA01181  |                                               | 0            | 0            | 30           | 0           | 0           | 0           | 1            | 31            |                                                      |           | WD       |          |          |          |          | WD        | WD                |
| B*58:06                                                 | 58:06                  | HLA01312  |                                               | 4            | 0            | 0            | 0           | 0           | 0           | 2            | 6             |                                                      |           |          |          |          |          |          | WD        | WD                |
| B*58:07                                                 | 58:07                  | HLA01680  |                                               | 1            | 0            | 0            | 0           | 0           | 0           | 0            | 1             |                                                      |           |          |          |          |          |          |           |                   |
| <b>B*58:08 total</b>                                    | <b>58:08 total</b>     |           |                                               | <b>0</b>     | <b>11</b>    | <b>4</b>     | <b>1</b>    | <b>0</b>    | <b>0</b>    | <b>0</b>     | <b>16</b>     |                                                      | <b>WD</b> |          |          |          |          |          | <b>WD</b> | <b>WD</b>         |
| B*58:08                                                 | 58:08                  |           |                                               | 0            | 0            | 0            | 1           | 0           | 0           | 0            | 1             |                                                      |           |          |          |          |          |          |           |                   |
| B*58:08:01                                              | 58:08:01               | HLA01723  |                                               | 0            | 9            | 3            | 0           | 0           | 0           | 0            | 12            |                                                      | WD        |          |          |          |          |          | WD        | WD                |
| B*58:08:02                                              | 58:08:02               | HLA06831  |                                               | 0            | 2            | 1            | 0           | 0           | 0           | 0            | 3             |                                                      |           |          |          |          |          |          |           |                   |
| B*58:09                                                 | 58:09                  | HLA01728  |                                               | 0            | 0            | 0            | 3           | 0           | 0           | 0            | 3             |                                                      |           |          |          |          |          |          |           |                   |
| B*58:14                                                 | 58:14                  | HLA02712  |                                               | 0            | 1            | 0            | 0           | 0           | 0           | 0            | 1             |                                                      |           |          |          |          |          |          |           |                   |

| Supplemental Table 9: HLA-B Allele Summary <sup>a</sup> |                        |           | Allele Count by Population Group <sup>b</sup> |     |     |      |      |     |     |     |       | 3.0.0 CIWD Category by Population Group <sup>c</sup> |     |      |      |     |     |     |       |                   |
|---------------------------------------------------------|------------------------|-----------|-----------------------------------------------|-----|-----|------|------|-----|-----|-----|-------|------------------------------------------------------|-----|------|------|-----|-----|-----|-------|-------------------|
| Allele                                                  | Genomic typing         | Allele ID | G group                                       | AFA | API | EURO | MENA | HIS | NAM | UNK | Total | AFA                                                  | API | EURO | MENA | HIS | NAM | UNK | Total | Highest Frequency |
| <b>B*58:16 total</b>                                    | <b>58:16 total</b>     |           |                                               | 0   | 0   | 5    | 0    | 1   | 0   | 1   | 7     |                                                      |     | WD   |      |     |     |     | WD    | WD                |
| B*58:16                                                 | 58:16                  |           |                                               | 0   | 0   | 1    | 0    | 0   | 0   | 0   | 1     |                                                      |     |      |      |     |     |     |       |                   |
| B*58:16:02                                              | 58:16:02               | HLA09572  |                                               | 0   | 0   | 4    | 0    | 1   | 0   | 1   | 6     |                                                      |     |      |      |     |     |     | WD    | WD                |
| B*58:18                                                 | 58:18                  | HLA03316  |                                               | 0   | 68  | 1    | 0    | 0   | 0   | 0   | 69    |                                                      | I   |      |      |     |     |     | WD    | I                 |
| <b>B*58:19 total</b>                                    | <b>58:19 total</b>     |           |                                               | 0   | 3   | 0    | 0    | 0   | 0   | 1   | 4     |                                                      |     |      |      |     |     |     |       |                   |
| <b>B*58:19:01G total</b>                                | <b>58:19:01G total</b> |           |                                               | 0   | 3   | 0    | 0    | 0   | 0   | 1   | 4     |                                                      |     |      |      |     |     |     |       |                   |
| B*58:19                                                 | 58:19                  | HLA03369  | 58:19:01G                                     | 0   | 3   | 0    | 0    | 0   | 0   | 1   | 4     |                                                      |     |      |      |     |     |     |       |                   |
| B*58:22                                                 | 58:22                  | HLA03968  |                                               | 0   | 1   | 0    | 0    | 0   | 0   | 1   | 2     |                                                      |     |      |      |     |     |     |       |                   |
| B*58:23                                                 | 58:23                  | HLA04087  |                                               | 0   | 0   | 19   | 0    | 0   | 0   | 0   | 19    |                                                      |     | WD   |      |     |     |     | WD    | WD                |
| B*58:24                                                 | 58:24                  | HLA04025  |                                               | 0   | 0   | 1    | 0    | 0   | 0   | 0   | 1     |                                                      |     |      |      |     |     |     |       |                   |
| B*58:25                                                 | 58:25                  | HLA04506  |                                               | 1   | 0   | 1    | 0    | 0   | 0   | 0   | 2     |                                                      |     |      |      |     |     |     |       |                   |
| B*58:26                                                 | 58:26                  | HLA04397  |                                               | 0   | 1   | 0    | 0    | 0   | 0   | 0   | 1     |                                                      |     |      |      |     |     |     |       |                   |
| <b>B*58:28 total</b>                                    | <b>58:28 total</b>     |           |                                               | 0   | 5   | 0    | 0    | 0   | 0   | 0   | 5     |                                                      | WD  |      |      |     |     |     | WD    | WD                |
| B*58:28:02                                              | 58:28:02               | HLA13001  |                                               | 0   | 5   | 0    | 0    | 0   | 0   | 0   | 5     |                                                      | WD  |      |      |     |     |     | WD    | WD                |
| B*58:33                                                 | 58:33                  | HLA06226  |                                               | 0   | 0   | 1    | 2    | 0   | 0   | 1   | 4     |                                                      |     |      |      |     |     |     |       |                   |
| B*58:34                                                 | 58:34                  | HLA06649  |                                               | 0   | 0   | 0    | 1    | 0   | 0   | 0   | 1     |                                                      |     |      |      |     |     |     |       |                   |
| B*58:35                                                 | 58:35                  | HLA07199  |                                               | 1   | 0   | 1    | 1    | 0   | 0   | 0   | 3     |                                                      |     |      |      |     |     |     |       |                   |
| B*58:37                                                 | 58:37                  | HLA08067  |                                               | 0   | 0   | 5    | 0    | 0   | 0   | 0   | 5     |                                                      |     | WD   |      |     |     |     | WD    | WD                |
| B*58:38                                                 | 58:38                  | HLA08365  |                                               | 1   | 0   | 0    | 0    | 0   | 0   | 0   | 1     |                                                      |     |      |      |     |     |     |       |                   |
| B*58:41                                                 | 58:41                  | HLA09302  |                                               | 0   | 1   | 0    | 0    | 0   | 0   | 0   | 1     |                                                      |     |      |      |     |     |     |       |                   |
| B*58:46                                                 | 58:46                  | HLA09698  |                                               | 1   | 0   | 0    | 0    | 0   | 0   | 0   | 1     |                                                      |     |      |      |     |     |     |       |                   |
| B*58:48                                                 | 58:48                  | HLA10146  |                                               | 0   | 2   | 0    | 0    | 0   | 0   | 0   | 2     |                                                      |     |      |      |     |     |     |       |                   |
| <b>B*58:59 total</b>                                    | <b>58:59 total</b>     |           |                                               | 0   | 1   | 0    | 0    | 0   | 0   | 0   | 1     |                                                      |     |      |      |     |     |     |       |                   |
| B*58:59:02                                              | 58:59:02               | HLA14306  |                                               | 0   | 1   | 0    | 0    | 0   | 0   | 0   | 1     |                                                      |     |      |      |     |     |     |       |                   |
| B*58:60                                                 | 58:60                  | HLA12124  |                                               | 1   | 0   | 0    | 0    | 0   | 0   | 0   | 1     |                                                      |     |      |      |     |     |     |       |                   |
| B*58:62                                                 | 58:62                  | HLA12284  |                                               | 0   | 9   | 0    | 0    | 0   | 0   | 0   | 9     |                                                      | WD  |      |      |     |     |     | WD    | WD                |
| B*58:64                                                 | 58:64                  | HLA12435  |                                               | 0   | 1   | 0    | 0    | 0   | 0   | 0   | 1     |                                                      |     |      |      |     |     |     |       |                   |
| B*58:65                                                 | 58:65                  | HLA12566  |                                               | 0   | 0   | 0    | 0    | 1   | 0   | 0   | 1     |                                                      |     |      |      |     |     |     |       |                   |
| B*58:68                                                 | 58:68                  | HLA12749  |                                               | 0   | 0   | 0    | 0    | 0   | 0   | 1   | 1     |                                                      |     |      |      |     |     |     |       |                   |
| B*58:73                                                 | 58:73                  | HLA13856  |                                               | 0   | 1   | 0    | 0    | 0   | 0   | 0   | 1     |                                                      |     |      |      |     |     |     |       |                   |
| B*58:74                                                 | 58:74                  | HLA14234  |                                               | 0   | 3   | 0    | 0    | 0   | 0   | 0   | 3     |                                                      |     |      |      |     |     |     |       |                   |

| Supplemental Table 9: HLA-B Allele Summary <sup>a</sup> |                        |           | Allele Count by Population Group <sup>b</sup> |             |             |            |           |            |            |            |             | 3.0.0 CIWD Category by Population Group <sup>c</sup> |          |           |           |           |           |          |          |                   |          |
|---------------------------------------------------------|------------------------|-----------|-----------------------------------------------|-------------|-------------|------------|-----------|------------|------------|------------|-------------|------------------------------------------------------|----------|-----------|-----------|-----------|-----------|----------|----------|-------------------|----------|
| Allele                                                  | Genomic typing         | Allele ID | G group                                       | AFA         | API         | EURO       | MENA      | HIS        | NAM        | UNK        | Total       | AFA                                                  | API      | EURO      | MENA      | HIS       | NAM       | UNK      | Total    | Highest Frequency |          |
| B*58:CODE                                               | 58:CODE                |           |                                               | 853         | 1339        | 5115       | 385       | 589        | 64         | 1110       | 9455        | NA                                                   | NA       | NA        | NA        | NA        | NA        | NA       | NA       | NA                | NA       |
| <b>B*59:01 total</b>                                    | <b>59:01 total</b>     |           |                                               | <b>2</b>    | <b>1009</b> | <b>37</b>  | <b>0</b>  | <b>10</b>  | <b>3</b>   | <b>347</b> | <b>1408</b> |                                                      | <b>C</b> | <b>WD</b> |           | <b>I</b>  |           | <b>C</b> | <b>I</b> | <b>C</b>          |          |
| <b>B*59:01:01G total</b>                                | <b>59:01:01G total</b> |           |                                               | <b>2</b>    | <b>1009</b> | <b>37</b>  | <b>0</b>  | <b>10</b>  | <b>3</b>   | <b>347</b> | <b>1408</b> |                                                      | <b>C</b> | <b>WD</b> |           | <b>I</b>  |           | <b>C</b> | <b>I</b> | <b>C</b>          |          |
| B*59:01                                                 | 59:01                  |           | 59:01:01G                                     | 0           | 80          | 4          | 0         | 2          | 0          | 33         | 119         |                                                      | I        |           |           |           |           | I        | WD       | I                 |          |
| B*59:01:01G                                             | 59:01:01G              |           | 59:01:01G                                     | 0           | 311         | 24         | 0         | 3          | 1          | 91         | 430         |                                                      | C        | WD        |           |           |           | I        | I        | C                 |          |
| B*59:01:01                                              | 59:01:01               |           | 59:01:01G                                     | 2           | 557         | 8          | 0         | 5          | 2          | 210        | 784         |                                                      | C        | WD        |           | WD        |           | C        | I        | C                 |          |
| B*59:01:01:01                                           | 59:01:01:01            | HLA00389  | 59:01:01G                                     | 0           | 4           | 0          | 0         | 0          | 0          | 1          | 5           |                                                      |          |           |           |           |           |          | WD       | WD                |          |
| B*59:01:01:02                                           | 59:01:01:02            | HLA06075  | 59:01:01G                                     | 0           | 57          | 1          | 0         | 0          | 0          | 12         | 70          |                                                      | I        |           |           |           |           | WD       | WD       | I                 |          |
| B*59:CODE                                               | 59:CODE                |           |                                               | 0           | 49          | 2          | 0         | 0          | 0          | 7          | 58          | NA                                                   | NA       | NA        | NA        | NA        | NA        | NA       | NA       | NA                | NA       |
| <b>B*67:01 total</b>                                    | <b>67:01 total</b>     |           |                                               | <b>14</b>   | <b>1214</b> | <b>601</b> | <b>13</b> | <b>71</b>  | <b>5</b>   | <b>324</b> | <b>2242</b> | <b>WD</b>                                            | <b>C</b> | <b>I</b>  | <b>WD</b> | <b>C</b>  | <b>WD</b> | <b>C</b> | <b>C</b> | <b>C</b>          |          |
| B*67:01                                                 | 67:01                  |           |                                               | 4           | 98          | 46         | 0         | 16         | 2          | 28         | 194         |                                                      | I        | WD        |           | I         |           | I        | I        | I                 |          |
| B*67:01:01                                              | 67:01:01               | HLA00390  |                                               | 1           | 952         | 70         | 13        | 2          | 0          | 203        | 1241        |                                                      | C        | WD        | WD        |           |           | C        | I        | C                 |          |
| <b>B*67:01:02G total</b>                                | <b>67:01:02G total</b> |           |                                               | <b>9</b>    | <b>164</b>  | <b>485</b> | <b>0</b>  | <b>53</b>  | <b>3</b>   | <b>93</b>  | <b>807</b>  | <b>WD</b>                                            | <b>C</b> | <b>I</b>  |           | <b>I</b>  |           | <b>I</b> | <b>I</b> | <b>C</b>          |          |
| B*67:01:02G                                             | 67:01:02G              |           | 67:01:02G                                     | 2           | 56          | 398        | 0         | 28         | 0          | 54         | 538         |                                                      | I        | I         |           | I         |           | I        | I        | I                 |          |
| B*67:01:02                                              | 67:01:02               | HLA00391  | 67:01:02G                                     | 7           | 108         | 87         | 0         | 25         | 3          | 39         | 269         | WD                                                   | I        | WD        |           | I         |           | I        | I        | I                 |          |
| B*67:02                                                 | 67:02                  | HLA01374  |                                               | 2           | 0           | 1          | 1         | 1          | 0          | 0          | 5           |                                                      |          |           |           |           |           |          | WD       | WD                |          |
| B*67:CODE                                               | 67:CODE                |           |                                               | 0           | 11          | 1          | 0         | 0          | 0          | 3          | 15          | NA                                                   | NA       | NA        | NA        | NA        | NA        | NA       | NA       | NA                | NA       |
| B*73:01                                                 | 73:01                  | HLA00392  |                                               | 256         | 231         | 6845       | 1558      | 524        | 58         | 1054       | 10526       | C                                                    | C        | C         | C         | C         | C         | C        | C        | C                 | C        |
| B*73:CODE                                               | 73:CODE                |           |                                               | 0           | 0           | 164        | 0         | 0          | 0          | 2          | 166         | NA                                                   | NA       | NA        | NA        | NA        | NA        | NA       | NA       | NA                | NA       |
| <b>B*78:01 total</b>                                    | <b>78:01 total</b>     |           |                                               | <b>3192</b> | <b>24</b>   | <b>293</b> | <b>74</b> | <b>737</b> | <b>148</b> | <b>891</b> | <b>5359</b> | <b>C</b>                                             | <b>I</b> | <b>I</b>  | <b>C</b>  | <b>C</b>  | <b>C</b>  | <b>C</b> | <b>C</b> | <b>C</b>          | <b>C</b> |
| B*78:01                                                 | 78:01                  |           |                                               | 389         | 2           | 55         | 5         | 119        | 15         | 102        | 687         | C                                                    |          | WD        | WD        | C         | C         | I        | I        | C                 |          |
| <b>B*78:01:01G total</b>                                | <b>78:01:01G total</b> |           |                                               | <b>2803</b> | <b>22</b>   | <b>234</b> | <b>69</b> | <b>617</b> | <b>133</b> | <b>788</b> | <b>4666</b> | <b>C</b>                                             | <b>I</b> | <b>I</b>  | <b>C</b>  | <b>C</b>  | <b>C</b>  | <b>C</b> | <b>C</b> | <b>C</b>          | <b>C</b> |
| B*78:01:01G                                             | 78:01:01G              |           | 78:01:01G                                     | 118         | 15          | 26         | 1         | 21         | 0          | 43         | 224         | C                                                    | I        | WD        |           | I         |           | I        | I        | C                 |          |
| B*78:01:01                                              | 78:01:01               |           | 78:01:01G                                     | 2482        | 6           | 201        | 67        | 527        | 114        | 680        | 4077        | C                                                    | WD       | I         | C         | C         | C         | C        | C        | C                 | C        |
| B*78:01:01:02                                           | 78:01:01:02            | HLA16309  | 78:01:01G                                     | 203         | 1           | 7          | 1         | 69         | 19         | 65         | 365         | C                                                    |          | WD        |           | I         | C         | I        | I        | C                 |          |
| B*78:01:02                                              | 78:01:02               | HLA06937  |                                               | 0           | 0           | 4          | 0         | 1          | 0          | 1          | 6           |                                                      |          |           |           |           |           |          | WD       | WD                |          |
| <b>B*78:02 total</b>                                    | <b>78:02 total</b>     |           |                                               | <b>3</b>    | <b>0</b>    | <b>188</b> | <b>3</b>  | <b>7</b>   | <b>3</b>   | <b>21</b>  | <b>225</b>  |                                                      |          | <b>I</b>  |           | <b>WD</b> |           | <b>I</b> | <b>I</b> | <b>I</b>          |          |
| B*78:02                                                 | 78:02                  |           |                                               | 1           | 0           | 17         | 0         | 1          | 0          | 1          | 20          |                                                      |          | WD        |           |           |           |          | WD       | WD                |          |
| B*78:02:01                                              | 78:02:01               | HLA00394  |                                               | 0           | 0           | 31         | 2         | 1          | 0          | 4          | 38          |                                                      |          | WD        |           |           |           |          | WD       | WD                |          |
| B*78:02:02                                              | 78:02:02               | HLA00395  |                                               | 2           | 0           | 140        | 1         | 5          | 3          | 16         | 167         |                                                      |          | I         |           | WD        |           | I        | I        | I                 |          |
| B*78:03                                                 | 78:03                  | HLA00396  |                                               | 0           | 0           | 1          | 0         | 0          | 0          | 0          | 1           |                                                      |          |           |           |           |           |          |          |                   |          |



| Supplemental Table 9: HLA-B Allele Summary <sup>a</sup> |                        |           | Allele Count by Population Group <sup>b</sup> |               |                |                 |               |               |              |                |                 | 3.0.0 CIWD Category by Population Group <sup>c</sup> |          |           |          |           |          |          |          |                   |
|---------------------------------------------------------|------------------------|-----------|-----------------------------------------------|---------------|----------------|-----------------|---------------|---------------|--------------|----------------|-----------------|------------------------------------------------------|----------|-----------|----------|-----------|----------|----------|----------|-------------------|
| Allele                                                  | Genomic typing         | Allele ID | G group                                       | AFA           | API            | EURO            | MENA          | HIS           | NAM          | UNK            | Total           | AFA                                                  | API      | EURO      | MENA     | HIS       | NAM      | UNK      | Total    | Highest Frequency |
| B*78:04                                                 | 78:04                  | HLA00990  |                                               | 1             | 1              | 2               | 0             | 61            | 2            | 7              | 74              |                                                      |          |           |          | I         |          | WD       | WD       | I                 |
| B*78:05                                                 | 78:05                  | HLA01403  |                                               | 0             | 1              | 1               | 0             | 0             | 0            | 0              | 2               |                                                      |          |           |          |           |          |          |          |                   |
| B*78:08                                                 | 78:08                  | HLA12300  |                                               | 0             | 0              | 0               | 0             | 1             | 0            | 0              | 1               |                                                      |          |           |          |           |          |          |          |                   |
| B*78:09                                                 | 78:09                  | HLA13984  |                                               | 0             | 0              | 1               | 0             | 0             | 0            | 0              | 1               |                                                      |          |           |          |           |          |          |          |                   |
| B*78:CODE                                               | 78:CODE                |           |                                               | 108           | 0              | 47              | 0             | 34            | 5            | 17             | 211             | NA                                                   | NA       | NA        | NA       | NA        | NA       | NA       | NA       | NA                |
| <b>B*81:01 total</b>                                    | <b>81:01 total</b>     |           |                                               | <b>7085</b>   | <b>272</b>     | <b>433</b>      | <b>126</b>    | <b>1046</b>   | <b>142</b>   | <b>1724</b>    | <b>10828</b>    | <b>C</b>                                             | <b>C</b> | <b>I</b>  | <b>C</b> | <b>C</b>  | <b>C</b> | <b>C</b> | <b>C</b> | <b>C</b>          |
| <b>B*81:01:01G total</b>                                | <b>81:01:01G total</b> |           |                                               | <b>7085</b>   | <b>272</b>     | <b>433</b>      | <b>126</b>    | <b>1046</b>   | <b>142</b>   | <b>1724</b>    | <b>10828</b>    | <b>C</b>                                             | <b>C</b> | <b>I</b>  | <b>C</b> | <b>C</b>  | <b>C</b> | <b>C</b> | <b>C</b> | <b>C</b>          |
| B*81:01                                                 | 81:01                  | HLA00398  | 81:01:01G                                     | 1142          | 4              | 40              | 2             | 207           | 37           | 279            | 1711            | C                                                    |          | WD        |          | C         | C        | C        | C        | C                 |
| B*81:01P                                                | 81:01P                 |           |                                               | 2             | 0              | 2               | 0             | 0             | 0            | 0              | 4               |                                                      |          |           |          |           |          |          |          |                   |
| B*81:01:01G                                             | 81:01:01G              |           | 81:01:01G                                     | 5936          | 238            | 391             | 124           | 839           | 105          | 1442           | 9075            | C                                                    | C        | I         | C        | C         | C        | C        | C        | C                 |
| B*81:02                                                 | 81:02                  | HLA01809  | 81:01:01G                                     | 5             | 30             | 0               | 0             | 0             | 0            | 3              | 38              | WD                                                   | I        |           |          |           |          |          | WD       | I                 |
| B*81:04N                                                | 81:04N                 | HLA03261  |                                               | 0             | 0              | 1               | 0             | 1             | 0            | 0              | 2               |                                                      |          |           |          |           |          |          |          |                   |
| B*81:05                                                 | 81:05                  | HLA05306  |                                               | 7             | 0              | 0               | 0             | 0             | 0            | 0              | 7               | WD                                                   |          |           |          |           |          |          | WD       | WD                |
| B*81:06                                                 | 81:06                  | HLA08387  |                                               | 0             | 0              | 0               | 0             | 0             | 0            | 1              | 1               |                                                      |          |           |          |           |          |          |          |                   |
| B*81:07                                                 | 81:07                  | HLA11447  |                                               | 1             | 0              | 0               | 0             | 0             | 0            | 0              | 1               |                                                      |          |           |          |           |          |          |          |                   |
| B*81:CODE                                               | 81:CODE                |           |                                               | 9             | 0              | 1               | 0             | 1             | 0            | 1              | 12              | NA                                                   | NA       | NA        | NA       | NA        | NA       | NA       | NA       | NA                |
| B*82:01                                                 | 82:01                  | HLA00399  |                                               | 925           | 4              | 45              | 1             | 213           | 34           | 191            | 1413            | C                                                    |          | WD        |          | C         | C        | C        | I        | C                 |
| <b>B*82:02 total</b>                                    | <b>82:02 total</b>     |           |                                               | <b>115</b>    | <b>2</b>       | <b>23</b>       | <b>60</b>     | <b>7</b>      | <b>3</b>     | <b>34</b>      | <b>244</b>      | <b>C</b>                                             |          | <b>WD</b> | <b>C</b> | <b>WD</b> |          | <b>I</b> | <b>I</b> | <b>C</b>          |
| B*82:02                                                 | 82:02                  |           |                                               | 50            | 1              | 9               | 7             | 2             | 0            | 12             | 81              | C                                                    |          | WD        | WD       |           |          | WD       | WD       | C                 |
| B*82:02:01                                              | 82:02:01               | HLA01188  |                                               | 65            | 1              | 14              | 53            | 5             | 3            | 22             | 163             | C                                                    |          | WD        | C        | WD        |          | I        | I        | C                 |
| B*82:03                                                 | 82:03                  | HLA04447  |                                               | 1             | 0              | 0               | 0             | 0             | 0            | 0              | 1               |                                                      |          |           |          |           |          |          |          |                   |
| B*82:CODE                                               | 82:CODE                |           |                                               | 3             | 0              | 2               | 0             | 0             | 0            | 0              | 5               | NA                                                   | NA       | NA        | NA       | NA        | NA       | NA       | NA       | NA                |
| B*83:01                                                 | 83:01                  | HLA01135  |                                               | 0             | 0              | 13              | 0             | 0             | 0            | 1              | 14              |                                                      |          | WD        |          |           |          |          | WD       | WD                |
| B*83:CODE                                               | 83:CODE                |           |                                               | 0             | 0              | 0               | 0             | 0             | 0            | 1              | 1               | NA                                                   | NA       | NA        | NA       | NA        | NA       | NA       | NA       | NA                |
| B*NEW <sup>d</sup>                                      | NEW                    |           |                                               | 0             | 1              | 1               | 0             | 0             | 0            | 0              | 2               | NA                                                   | NA       | NA        | NA       | NA        | NA       | NA       | NA       | NA                |
| <b>B*Total <sup>e</sup></b>                             | <b>Total</b>           |           |                                               | <b>388579</b> | <b>1298351</b> | <b>11941489</b> | <b>402160</b> | <b>700912</b> | <b>66967</b> | <b>1320714</b> | <b>16119172</b> |                                                      |          |           |          |           |          |          |          |                   |

C, common; I, intermediate; WD, well-documented; NA, not applicable

| Supplemental Table 9: HLA-B Allele Summary <sup>a</sup> |                |           |         | Allele Count by Population Group <sup>b</sup> |     |      |      |     |     |     |       | 3.0.0 CIWD Category by Population Group <sup>c</sup> |     |      |      |     |     |     |       |                   |
|---------------------------------------------------------|----------------|-----------|---------|-----------------------------------------------|-----|------|------|-----|-----|-----|-------|------------------------------------------------------|-----|------|------|-----|-----|-----|-------|-------------------|
| Allele                                                  | Genomic typing | Allele ID | G group | AFA                                           | API | EURO | MENA | HIS | NAM | UNK | Total | AFA                                                  | API | EURO | MENA | HIS | NAM | UNK | Total | Highest Frequency |

<sup>a</sup> All alleles observed in the current dataset are included in this table. Note that alleles are not in numerical order; alleles within a G group are clustered together. P group "two-field" total (e.g., written as "B\*07:02 total") and G group total summary rows are provided. The table does not list all alleles from IPD-IMGT version 3.31.0, if not present in the study dataset.

<sup>b</sup> Population groups include: AFA (African/African American), API (Asian/Pacific Islands), EURO (European/European descent), MENA (Middle East/North Coast of Africa), HIS (South or Central America/Hispanic/Latino), NAM (Native American populations) and UNK (unknown/not asked/multiple ancestries/other). Total is the overall population i.e., all groups combined.

<sup>c</sup> Allele frequency is calculated by dividing the number of times the "allele" of interest is observed in a population by the total number of copies of all the alleles at that particular genetic locus in the population (reported as the last row in this table and also in Table 2b). The total number of copies is calculated by multiplying the number of individuals times two for all loci except DRB3/4/5. For DRB3/4/5, the number of assignments was used as the total. The CIWD status is determined based on the allele frequency. Allele frequency data will be provided on the website of the next International HLA and Immunogenetics Workshop (<https://www.ihw18.org/>). Highest frequency is the highest CIWD designation among all the individual groups.

<sup>d</sup> "CODE" is generically defined as a summary category of submitted HLA typing, including NMDP multiple allele codes, with ambiguities that are not within a single P or G group. "NEW" is a summary category for assignments of novel alleles that did not yet receive a nomenclature assignment. The CODE and NEW categories add to the total number of alleles but should not be assigned CIWD designations (labeled as NA, not applicable) as they do not represent a consistent allele designation (i.e., the NEW category may contain alleles with different DNA sequences that are unrelated to one another).

<sup>e</sup> B\*Total is the total number of allele assignments for the population group and is based on two times the number of individuals in the group. This number is also listed in Table 2b. It is not the sum of the column as alleles are not counted more than once. For example, when evaluating frequencies at the level of G resolution, individual alleles that make up the G group (e.g., A\*80:01:01, A\*80:01:01:01, A\*80:01:01:02, A\*80:01:01G) are not included in the count because these alleles are summed up in the total G designation (e.g., "A\*80:01:01G total").
