# Supplementary material for: Common, intermediate and well‐documented HLA alleles in world populations: CIWD version 3.0.0
Source: PubMed Central journal article supplement (PMC7317522; doi:10.1111/tan.13811), 2020-01-31
Supplement: TAN-95-516-s010.pdf [file TAN-95-516-s010.pdf]

| Supplemental Table 10: HLA-C Allele Summary <sup>a</sup> |                        |           | Allele Count by Population Group <sup>b</sup> |             |              |               |              |              |             |              |               | 3.0.0 CIWD Category by Population Group <sup>c</sup> |          |          |          |          |          |          |          |                   |
|----------------------------------------------------------|------------------------|-----------|-----------------------------------------------|-------------|--------------|---------------|--------------|--------------|-------------|--------------|---------------|------------------------------------------------------|----------|----------|----------|----------|----------|----------|----------|-------------------|
| Allele                                                   | Genomic typing         | Allele ID | G group                                       | AFA         | API          | EURO          | MENA         | HIS          | NAM         | UNK          | Total         | AFA                                                  | API      | EURO     | MENA     | HIS      | NAM      | UNK      | Total    | Highest Frequency |
| <b>C*01:02 total</b>                                     | <b>01:02 total</b>     |           |                                               | <b>3139</b> | <b>82700</b> | <b>386694</b> | <b>11546</b> | <b>30050</b> | <b>2576</b> | <b>42956</b> | <b>559661</b> | <b>C</b>                                             | <b>C</b> | <b>C</b> | <b>C</b> | <b>C</b> | <b>C</b> | <b>C</b> | <b>C</b> | <b>C</b>          |
| C*01:02                                                  | 01:02                  |           |                                               | 2           | 26           | 2091          | 3            | 44           | 2           | 99           | 2267          |                                                      | I        | C        |          | I        |          | I        | C        | C                 |
| C*01:02P                                                 | 01:02P                 |           |                                               | 0           | 3            | 450           | 1            | 9            | 0           | 4            | 467           |                                                      |          | I        |          | I        |          |          | I        | I                 |
| <b>C*01:02:01G total</b>                                 | <b>01:02:01G total</b> |           |                                               | <b>3133</b> | <b>82341</b> | <b>383811</b> | <b>11538</b> | <b>29962</b> | <b>2572</b> | <b>42801</b> | <b>556158</b> | <b>C</b>                                             | <b>C</b> | <b>C</b> | <b>C</b> | <b>C</b> | <b>C</b> | <b>C</b> | <b>C</b> | <b>C</b>          |
| C*01:02:01G                                              | 01:02:01G              |           | 01:02:01G                                     | 2507        | 72791        | 366919        | 11271        | 22425        | 1869        | 38950        | 516732        | C                                                    | C        | C        | C        | C        | C        | C        | C        | C                 |
| C*01:02:01                                               | 01:02:01               |           | 01:02:01G                                     | 602         | 9131         | 15757         | 245          | 6893         | 638         | 3630         | 36896         | C                                                    | C        | C        | C        | C        | C        | C        | C        | C                 |
| C*01:02:01:01                                            | 01:02:01:01            | HLA00401  | 01:02:01G                                     | 19          | 371          | 1043          | 19           | 400          | 36          | 194          | 2082          | WD                                                   | C        | I        | WD       | C        | C        | C        | C        | C                 |
| C*01:02:01:03                                            | 01:02:01:03            | HLA16866  | 01:02:01G                                     | 0           | 0            | 10            | 0            | 1            | 0           | 1            | 12            |                                                      |          | WD       |          |          |          |          | WD       | WD                |
| C*01:02:01:04                                            | 01:02:01:04            | HLA17051  | 01:02:01G                                     | 0           | 0            | 1             | 0            | 3            | 0           | 1            | 5             |                                                      |          |          |          |          |          |          | WD       | WD                |
| C*01:02:12                                               | 01:02:12               | HLA05781  | 01:02:01G                                     | 0           | 1            | 0             | 0            | 0            | 0           | 0            | 1             |                                                      |          |          |          |          |          |          |          |                   |
| C*01:02:30                                               | 01:02:30               | HLA12437  | 01:02:01G                                     | 5           | 5            | 14            | 2            | 237          | 29          | 21           | 313           | WD                                                   | WD       | WD       |          | C        | C        | I        | I        | C                 |
| C*01:44                                                  | 01:44                  | HLA05762  | 01:02:01G                                     | 0           | 41           | 13            | 1            | 1            | 0           | 2            | 58            |                                                      | I        | WD       |          |          |          |          | WD       | I                 |
| C*01:85                                                  | 01:85                  | HLA10566  | 01:02:01G                                     | 0           | 1            | 0             | 0            | 0            | 0           | 0            | 1             |                                                      |          |          |          |          |          |          |          |                   |
| C*01:127                                                 | 01:127                 | HLA15575  | 01:02:01G                                     | 0           | 0            | 54            | 0            | 2            | 0           | 2            | 58            |                                                      |          | WD       |          |          |          |          | WD       | WD                |
| C*01:02:03                                               | 01:02:03               | HLA02044  |                                               | 1           | 327          | 6             | 2            | 0            | 0           | 29           | 365           |                                                      | C        | WD       |          |          |          | I        | I        | C                 |
| C*01:02:04                                               | 01:02:04               | HLA02670  |                                               | 2           | 1            | 26            | 2            | 1            | 0           | 3            | 35            |                                                      |          | WD       |          |          |          |          | WD       | WD                |
| C*01:02:06                                               | 01:02:06               | HLA03445  |                                               | 0           | 0            | 2             | 0            | 0            | 0           | 1            | 3             |                                                      |          |          |          |          |          |          |          |                   |
| C*01:02:07                                               | 01:02:07               | HLA03730  |                                               | 0           | 0            | 69            | 0            | 0            | 0           | 1            | 70            |                                                      |          | WD       |          |          |          |          | WD       | WD                |
| C*01:02:08                                               | 01:02:08               | HLA04275  |                                               | 0           | 0            | 219           | 0            | 0            | 0           | 3            | 222           |                                                      |          | I        |          |          |          |          | I        | I                 |
| C*01:02:09                                               | 01:02:09               | HLA04606  |                                               | 0           | 0            | 4             | 0            | 0            | 0           | 0            | 4             |                                                      |          |          |          |          |          |          |          |                   |
| C*01:02:10                                               | 01:02:10               | HLA05209  |                                               | 0           | 0            | 2             | 0            | 5            | 0           | 4            | 11            |                                                      |          |          |          | WD       |          |          | WD       | WD                |
| C*01:02:16                                               | 01:02:16               | HLA08145  |                                               | 1           | 0            | 2             | 0            | 29           | 2           | 9            | 43            |                                                      |          |          |          | I        |          | WD       | WD       | I                 |
| C*01:02:18                                               | 01:02:18               | HLA08885  |                                               | 0           | 0            | 1             | 0            | 0            | 0           | 0            | 1             |                                                      |          |          |          |          |          |          |          |                   |
| C*01:02:22                                               | 01:02:22               | HLA09953  |                                               | 0           | 0            | 0             | 0            | 0            | 0           | 1            | 1             |                                                      |          |          |          |          |          |          |          |                   |
| C*01:02:27                                               | 01:02:27               | HLA11850  |                                               | 0           | 0            | 1             | 0            | 0            | 0           | 0            | 1             |                                                      |          |          |          |          |          |          |          |                   |
| C*01:02:32                                               | 01:02:32               | HLA12495  |                                               | 0           | 0            | 2             | 0            | 0            | 0           | 0            | 2             |                                                      |          |          |          |          |          |          |          |                   |
| C*01:02:34                                               | 01:02:34               | HLA12670  |                                               | 0           | 0            | 4             | 0            | 0            | 0           | 0            | 4             |                                                      |          |          |          |          |          |          |          |                   |
| C*01:02:36                                               | 01:02:36               | HLA13526  |                                               | 0           | 0            | 2             | 0            | 0            | 0           | 0            | 2             |                                                      |          |          |          |          |          |          |          |                   |
| C*01:02:37                                               | 01:02:37               | HLA14597  |                                               | 0           | 1            | 0             | 0            | 0            | 0           | 0            | 1             |                                                      |          |          |          |          |          |          |          |                   |
| C*01:02:40                                               | 01:02:40               | HLA15195  |                                               | 0           | 0            | 1             | 0            | 0            | 0           | 0            | 1             |                                                      |          |          |          |          |          |          |          |                   |
| C*01:02:41                                               | 01:02:41               | HLA15929  |                                               | 0           | 0            | 1             | 0            | 0            | 0           | 0            | 1             |                                                      |          |          |          |          |          |          |          |                   |

| Supplemental Table 10: HLA-C Allele Summary <sup>a</sup> |                        |           | Allele Count by Population Group <sup>b</sup> |          |             |            |           |          |          |            |             | 3.0.0 CIWD Category by Population Group <sup>c</sup> |          |           |          |     |     |           |           |                   |   |
|----------------------------------------------------------|------------------------|-----------|-----------------------------------------------|----------|-------------|------------|-----------|----------|----------|------------|-------------|------------------------------------------------------|----------|-----------|----------|-----|-----|-----------|-----------|-------------------|---|
| Allele                                                   | Genomic typing         | Allele ID | G group                                       | AFA      | API         | EURO       | MENA      | HIS      | NAM      | UNK        | Total       | AFA                                                  | API      | EURO      | MENA     | HIS | NAM | UNK       | Total     | Highest Frequency |   |
| C*01:40                                                  | 01:40                  | HLA05418  |                                               | 0        | 1           | 0          | 0         | 0        | 0        | 1          | 2           |                                                      |          |           |          |     |     |           |           |                   |   |
| <b>C*01:03 total</b>                                     | <b>01:03 total</b>     |           |                                               | <b>1</b> | <b>1026</b> | <b>93</b>  | <b>48</b> | <b>2</b> | <b>0</b> | <b>106</b> | <b>1276</b> |                                                      | <b>C</b> | <b>WD</b> | <b>C</b> |     |     | <b>I</b>  | <b>I</b>  | <b>C</b>          |   |
| <b>C*01:03:01G total</b>                                 | <b>01:03:01G total</b> |           |                                               | <b>1</b> | <b>1026</b> | <b>93</b>  | <b>48</b> | <b>2</b> | <b>0</b> | <b>106</b> | <b>1276</b> |                                                      | <b>C</b> | <b>WD</b> | <b>C</b> |     |     | <b>I</b>  | <b>I</b>  | <b>C</b>          |   |
| C*01:03                                                  | 01:03                  | HLA00402  | 01:03:01G                                     | 0        | 244         | 7          | 0         | 2        | 0        | 27         | 280         |                                                      | C        | WD        |          |     |     | I         | I         | C                 |   |
| C*01:03:01G                                              | 01:03:01G              |           | 01:03:01G                                     | 1        | 782         | 86         | 48        | 0        | 0        | 79         | 996         |                                                      | C        | WD        | C        |     |     | I         | I         | C                 |   |
| C*01:04                                                  | 01:04                  | HLA01075  |                                               | 0        | 6           | 0          | 0         | 0        | 0        | 0          | 6           |                                                      | WD       |           |          |     |     |           | WD        | WD                |   |
| C*01:05                                                  | 01:05                  | HLA01434  |                                               | 0        | 0           | 0          | 0         | 0        | 0        | 1          | 1           |                                                      |          |           |          |     |     |           |           |                   |   |
| C*01:06                                                  | 01:06                  | HLA01555  |                                               | 0        | 82          | 13         | 2         | 1        | 0        | 10         | 108         |                                                      | I        | WD        |          |     |     |           | WD        | WD                | I |
| <b>C*01:07 total</b>                                     | <b>01:07 total</b>     |           |                                               | <b>0</b> | <b>0</b>    | <b>158</b> | <b>0</b>  | <b>2</b> | <b>1</b> | <b>5</b>   | <b>166</b>  |                                                      |          | <b>I</b>  |          |     |     | <b>WD</b> | <b>I</b>  | <b>I</b>          |   |
| C*01:07                                                  | 01:07                  |           |                                               | 0        | 0           | 81         | 0         | 1        | 1        | 3          | 86          |                                                      |          | WD        |          |     |     |           | WD        | WD                |   |
| C*01:07:01                                               | 01:07:01               | HLA01644  |                                               | 0        | 0           | 77         | 0         | 1        | 0        | 1          | 79          |                                                      |          | WD        |          |     |     |           | WD        | WD                |   |
| C*01:07:02                                               | 01:07:02               | HLA12493  |                                               | 0        | 0           | 0          | 0         | 0        | 0        | 1          | 1           |                                                      |          |           |          |     |     |           |           |                   |   |
| C*01:08                                                  | 01:08                  | HLA01636  |                                               | 0        | 152         | 3          | 0         | 0        | 0        | 13         | 168         |                                                      | C        |           |          |     |     |           | WD        | I                 | C |
| C*01:09                                                  | 01:09                  | HLA01659  |                                               | 0        | 1           | 3          | 0         | 0        | 0        | 0          | 4           |                                                      |          |           |          |     |     |           |           |                   |   |
| C*01:10                                                  | 01:10                  | HLA01866  |                                               | 0        | 0           | 8          | 0         | 48       | 1        | 7          | 64          |                                                      |          | WD        |          | I   |     | WD        | WD        | I                 |   |
| <b>C*01:12 total</b>                                     | <b>01:12 total</b>     |           |                                               | <b>0</b> | <b>2</b>    | <b>5</b>   | <b>4</b>  | <b>0</b> | <b>0</b> | <b>1</b>   | <b>12</b>   |                                                      |          | <b>WD</b> |          |     |     |           | <b>WD</b> | <b>WD</b>         |   |
| C*01:12                                                  | 01:12                  |           |                                               | 0        | 1           | 1          | 1         | 0        | 0        | 1          | 4           |                                                      |          |           |          |     |     |           |           |                   |   |
| C*01:12:01                                               | 01:12:01               | HLA02469  |                                               | 0        | 1           | 4          | 3         | 0        | 0        | 0          | 8           |                                                      |          |           |          |     |     |           | WD        | WD                |   |
| C*01:13                                                  | 01:13                  | HLA02478  |                                               | 1        | 0           | 6          | 0         | 1        | 0        | 2          | 10          |                                                      |          | WD        |          |     |     |           | WD        | WD                |   |
| C*01:14                                                  | 01:14                  | HLA02790  |                                               | 0        | 1           | 4          | 0         | 0        | 0        | 0          | 5           |                                                      |          |           |          |     |     |           | WD        | WD                |   |
| <b>C*01:15 total</b>                                     | <b>01:15 total</b>     |           |                                               | <b>0</b> | <b>0</b>    | <b>1</b>   | <b>0</b>  | <b>0</b> | <b>0</b> | <b>0</b>   | <b>1</b>    |                                                      |          |           |          |     |     |           |           |                   |   |
| C*01:15                                                  | 01:15                  |           |                                               | 0        | 0           | 1          | 0         | 0        | 0        | 0          | 1           |                                                      |          |           |          |     |     |           |           |                   |   |
| C*01:16                                                  | 01:16                  | HLA02812  |                                               | 1        | 0           | 0          | 0         | 0        | 0        | 0          | 1           |                                                      |          |           |          |     |     |           |           |                   |   |
| C*01:17                                                  | 01:17                  | HLA02813  |                                               | 3        | 480         | 13         | 21        | 0        | 0        | 4          | 521         |                                                      | C        | WD        | WD       |     |     |           | I         | C                 |   |
| C*01:18                                                  | 01:18                  | HLA02814  |                                               | 0        | 4           | 0          | 0         | 0        | 0        | 0          | 4           |                                                      |          |           |          |     |     |           |           |                   |   |
| C*01:22                                                  | 01:22                  | HLA03363  |                                               | 0        | 0           | 21         | 0         | 7        | 0        | 6          | 34          |                                                      |          | WD        |          | I   |     | WD        | WD        | I                 |   |
| C*01:27                                                  | 01:27                  | HLA03707  |                                               | 0        | 1           | 57         | 0         | 3        | 0        | 7          | 68          |                                                      |          | WD        |          |     |     | WD        | WD        | WD                |   |
| C*01:30                                                  | 01:30                  | HLA04020  |                                               | 0        | 3           | 1          | 2         | 0        | 0        | 0          | 6           |                                                      |          |           |          |     |     |           | WD        | WD                |   |
| <b>C*01:32 total</b>                                     | <b>01:32 total</b>     |           |                                               | <b>0</b> | <b>3</b>    | <b>154</b> | <b>0</b>  | <b>0</b> | <b>0</b> | <b>7</b>   | <b>164</b>  |                                                      |          | <b>I</b>  |          |     |     | <b>WD</b> | <b>I</b>  | <b>I</b>          |   |
| C*01:32                                                  | 01:32                  |           |                                               | 0        | 3           | 112        | 0         | 0        | 0        | 7          | 122         |                                                      |          | WD        |          |     |     | WD        | WD        | WD                |   |
| C*01:32:01                                               | 01:32:01               | HLA04289  |                                               | 0        | 0           | 42         | 0         | 0        | 0        | 0          | 42          |                                                      |          | WD        |          |     |     |           | WD        | WD                |   |

| Supplemental Table 10: HLA-C Allele Summary <sup>a</sup> |                    |           | Allele Count by Population Group <sup>b</sup> |          |          |          |          |          |          |          |          |     | 3.0.0 CIWD Category by Population Group <sup>c</sup> |      |      |     |     |     |       |                   |
|----------------------------------------------------------|--------------------|-----------|-----------------------------------------------|----------|----------|----------|----------|----------|----------|----------|----------|-----|------------------------------------------------------|------|------|-----|-----|-----|-------|-------------------|
| Allele                                                   | Genomic typing     | Allele ID | G group                                       | AFA      | API      | EURO     | MENA     | HIS      | NAM      | UNK      | Total    | AFA | API                                                  | EURO | MENA | HIS | NAM | UNK | Total | Highest Frequency |
| C*01:33                                                  | 01:33              | HLA04290  |                                               | 0        | 1        | 4        | 0        | 0        | 0        | 0        | 5        |     |                                                      |      |      |     |     |     | WD    | WD                |
| C*01:36                                                  | 01:36              | HLA04756  |                                               | 0        | 0        | 1        | 0        | 0        | 0        | 0        | 1        |     |                                                      |      |      |     |     |     |       |                   |
| C*01:37N                                                 | 01:37N             | HLA04852  |                                               | 0        | 1        | 0        | 0        | 0        | 0        | 0        | 1        |     |                                                      |      |      |     |     |     |       |                   |
| C*01:39                                                  | 01:39              | HLA05130  |                                               | 0        | 0        | 0        | 0        | 0        | 0        | 1        | 1        |     |                                                      |      |      |     |     |     |       |                   |
| C*01:41                                                  | 01:41              | HLA05574  |                                               | 0        | 1        | 2        | 0        | 0        | 0        | 0        | 3        |     |                                                      |      |      |     |     |     |       |                   |
| C*01:45                                                  | 01:45              | HLA05873  |                                               | 1        | 0        | 20       | 0        | 0        | 0        | 1        | 22       |     |                                                      | WD   |      |     |     |     | WD    | WD                |
| C*01:51                                                  | 01:51              | HLA06305  |                                               | 0        | 1        | 4        | 0        | 0        | 0        | 0        | 5        |     |                                                      |      |      |     |     |     | WD    | WD                |
| C*01:52                                                  | 01:52              | HLA06386  |                                               | 0        | 0        | 11       | 0        | 0        | 0        | 0        | 11       |     |                                                      | WD   |      |     |     |     | WD    | WD                |
| C*01:54                                                  | 01:54              | HLA06587  |                                               | 0        | 3        | 10       | 0        | 0        | 0        | 4        | 17       |     |                                                      | WD   |      |     |     |     | WD    | WD                |
| C*01:56N                                                 | 01:56N             | HLA06704  |                                               | 0        | 2        | 0        | 0        | 0        | 0        | 0        | 2        |     |                                                      |      |      |     |     |     |       |                   |
| C*01:57                                                  | 01:57              | HLA06731  |                                               | 0        | 1        | 0        | 0        | 0        | 0        | 0        | 1        |     |                                                      |      |      |     |     |     |       |                   |
| C*01:58                                                  | 01:58              | HLA07121  |                                               | 0        | 0        | 10       | 8        | 0        | 0        | 1        | 19       |     |                                                      | WD   | WD   |     |     |     | WD    | WD                |
| C*01:59                                                  | 01:59              | HLA07213  |                                               | 0        | 0        | 11       | 0        | 0        | 0        | 0        | 11       |     |                                                      | WD   |      |     |     |     | WD    | WD                |
| C*01:60                                                  | 01:60              | HLA07214  |                                               | 0        | 0        | 4        | 0        | 0        | 0        | 0        | 4        |     |                                                      |      |      |     |     |     |       |                   |
| C*01:62                                                  | 01:62              | HLA07475  |                                               | 0        | 0        | 8        | 0        | 0        | 0        | 1        | 9        |     |                                                      | WD   |      |     |     |     | WD    | WD                |
| <b>C*01:63 total</b>                                     | <b>01:63 total</b> |           |                                               | <b>0</b> | <b>0</b> | <b>2</b> | <b>0</b> | <b>0</b> | <b>0</b> | <b>0</b> | <b>2</b> |     |                                                      |      |      |     |     |     |       |                   |
| C*01:63                                                  | 01:63              |           |                                               | 0        | 0        | 1        | 0        | 0        | 0        | 0        | 1        |     |                                                      |      |      |     |     |     |       |                   |
| C*01:141                                                 | 01:141             | HLA07476  |                                               | 0        | 0        | 1        | 0        | 0        | 0        | 0        | 1        |     |                                                      |      |      |     |     |     |       |                   |
| C*01:64                                                  | 01:64              | HLA07528  |                                               | 0        | 1        | 2        | 0        | 0        | 0        | 0        | 3        |     |                                                      |      |      |     |     |     |       |                   |
| C*01:65                                                  | 01:65              | HLA07556  |                                               | 0        | 0        | 3        | 0        | 0        | 0        | 0        | 3        |     |                                                      |      |      |     |     |     |       |                   |
| C*01:66                                                  | 01:66              | HLA07729  |                                               | 0        | 0        | 1        | 0        | 0        | 0        | 0        | 1        |     |                                                      |      |      |     |     |     |       |                   |
| C*01:67                                                  | 01:67              | HLA07941  |                                               | 1        | 0        | 1        | 0        | 3        | 0        | 0        | 5        |     |                                                      |      |      |     |     |     | WD    | WD                |
| C*01:70                                                  | 01:70              | HLA08146  |                                               | 0        | 0        | 24       | 0        | 0        | 0        | 2        | 26       |     |                                                      | WD   |      |     |     |     | WD    | WD                |
| C*01:72                                                  | 01:72              | HLA08178  |                                               | 0        | 0        | 1        | 0        | 0        | 0        | 0        | 1        |     |                                                      |      |      |     |     |     |       |                   |
| C*01:74                                                  | 01:74              | HLA09012  |                                               | 0        | 0        | 16       | 0        | 0        | 0        | 1        | 17       |     |                                                      | WD   |      |     |     |     | WD    | WD                |
| C*01:75                                                  | 01:75              | HLA09111  |                                               | 0        | 0        | 0        | 0        | 0        | 0        | 1        | 1        |     |                                                      |      |      |     |     |     |       |                   |
| C*01:77                                                  | 01:77              | HLA09669  |                                               | 0        | 1        | 0        | 0        | 0        | 0        | 0        | 1        |     |                                                      |      |      |     |     |     |       |                   |
| C*01:92                                                  | 01:92              | HLA11040  |                                               | 0        | 0        | 1        | 0        | 0        | 0        | 0        | 1        |     |                                                      |      |      |     |     |     |       |                   |
| C*01:93                                                  | 01:93              | HLA11250  |                                               | 0        | 0        | 1        | 0        | 0        | 0        | 3        | 4        |     |                                                      |      |      |     |     |     |       |                   |
| C*01:95                                                  | 01:95              | HLA11848  |                                               | 0        | 1        | 0        | 0        | 0        | 0        | 0        | 1        |     |                                                      |      |      |     |     |     |       |                   |
| C*01:96                                                  | 01:96              | HLA11849  |                                               | 0        | 0        | 1        | 0        | 0        | 0        | 4        | 5        |     |                                                      |      |      |     |     |     | WD    | WD                |

| Supplemental Table 10: HLA-C Allele Summary <sup>a</sup> |                        |           | Allele Count by Population Group <sup>b</sup> |              |             |               |              |              |             |              |               | 3.0.0 CIWD Category by Population Group <sup>c</sup> |          |          |          |          |          |          |          |                   |
|----------------------------------------------------------|------------------------|-----------|-----------------------------------------------|--------------|-------------|---------------|--------------|--------------|-------------|--------------|---------------|------------------------------------------------------|----------|----------|----------|----------|----------|----------|----------|-------------------|
| Allele                                                   | Genomic typing         | Allele ID | G group                                       | AFA          | API         | EURO          | MENA         | HIS          | NAM         | UNK          | Total         | AFA                                                  | API      | EURO     | MENA     | HIS      | NAM      | UNK      | Total    | Highest Frequency |
| C*01:97                                                  | 01:97                  | HLA11851  |                                               | 0            | 1           | 0             | 1            | 0            | 0           | 0            | 2             |                                                      |          |          |          |          |          |          |          |                   |
| C*01:99                                                  | 01:99                  | HLA11972  |                                               | 0            | 0           | 2             | 0            | 0            | 0           | 0            | 2             |                                                      |          |          |          |          |          |          |          |                   |
| C*01:100                                                 | 01:100                 | HLA12135  |                                               | 0            | 3           | 0             | 0            | 0            | 0           | 0            | 3             |                                                      |          |          |          |          |          |          |          |                   |
| C*01:101                                                 | 01:101                 | HLA12432  |                                               | 0            | 1           | 0             | 0            | 0            | 0           | 0            | 1             |                                                      |          |          |          |          |          |          |          |                   |
| C*01:102                                                 | 01:102                 | HLA12436  |                                               | 0            | 1           | 0             | 0            | 0            | 0           | 0            | 1             |                                                      |          |          |          |          |          |          |          |                   |
| C*01:103                                                 | 01:103                 | HLA12494  |                                               | 0            | 0           | 5             | 0            | 0            | 0           | 0            | 5             |                                                      |          | WD       |          |          |          |          | WD       | WD                |
| C*01:104                                                 | 01:104                 | HLA12497  |                                               | 0            | 0           | 0             | 0            | 0            | 0           | 1            | 1             |                                                      |          |          |          |          |          |          |          |                   |
| C*01:107                                                 | 01:107                 | HLA12738  |                                               | 0            | 1           | 1             | 0            | 0            | 0           | 0            | 2             |                                                      |          |          |          |          |          |          |          |                   |
| C*01:114                                                 | 01:114                 | HLA14019  |                                               | 0            | 1           | 0             | 0            | 0            | 0           | 0            | 1             |                                                      |          |          |          |          |          |          |          |                   |
| C*01:117N                                                | 01:117N                | HLA14213  |                                               | 0            | 0           | 3             | 0            | 0            | 0           | 0            | 3             |                                                      |          |          |          |          |          |          |          |                   |
| C*01:119                                                 | 01:119                 | HLA14520  |                                               | 0            | 0           | 1             | 0            | 0            | 0           | 0            | 1             |                                                      |          |          |          |          |          |          |          |                   |
| C*01:121Q                                                | 01:121Q                | HLA14993  |                                               | 0            | 0           | 2             | 0            | 2            | 0           | 1            | 5             |                                                      |          |          |          |          |          |          | WD       | WD                |
| C*01:136                                                 | 01:136                 | HLA16428  |                                               | 0            | 1           | 0             | 0            | 0            | 0           | 0            | 1             |                                                      |          |          |          |          |          |          |          |                   |
| C*01:146                                                 | 01:146                 | HLA17754  |                                               | 0            | 0           | 0             | 0            | 0            | 0           | 1            | 1             |                                                      |          |          |          |          |          |          |          |                   |
| C*01:CODE <sup>d</sup>                                   | 01:CODE                |           |                                               | 472          | 5855        | 45527         | 847          | 4312         | 458         | 5656         | 63127         | NA                                                   | NA       | NA       | NA       | NA       | NA       | NA       | NA       | NA                |
| <b>C*02:02 total</b>                                     | <b>02:02 total</b>     |           |                                               | <b>29264</b> | <b>9442</b> | <b>596689</b> | <b>12476</b> | <b>25268</b> | <b>2979</b> | <b>49975</b> | <b>726093</b> | <b>C</b>                                             | <b>C</b> | <b>C</b> | <b>C</b> | <b>C</b> | <b>C</b> | <b>C</b> | <b>C</b> | <b>C</b>          |
| C*02:02                                                  | 02:02                  |           |                                               | 10           | 6           | 3851          | 19           | 17           | 1           | 158          | 4062          | WD                                                   | WD       | C        | WD       | I        |          | C        | C        | C                 |
| C*02:02P                                                 | 02:02P                 |           |                                               | 218          | 3           | 768           | 8            | 96           | 4           | 80           | 1177          | C                                                    |          | I        | WD       | C        |          | I        | I        | C                 |
| C*02:02:01                                               | 02:02:01               | HLA00404  |                                               | 1            | 0           | 16            | 0            | 0            | 0           | 0            | 17            |                                                      |          | WD       |          |          |          |          | WD       | WD                |
| <b>C*02:02:02G total</b>                                 | <b>02:02:02G total</b> |           |                                               | <b>6264</b>  | <b>9202</b> | <b>585646</b> | <b>11476</b> | <b>18909</b> | <b>2168</b> | <b>42916</b> | <b>676581</b> | <b>C</b>                                             | <b>C</b> | <b>C</b> | <b>C</b> | <b>C</b> | <b>C</b> | <b>C</b> | <b>C</b> | <b>C</b>          |
| C*02:02:02G                                              | 02:02:02G              |           | 02:02:02G                                     | 4774         | 8192        | 554005        | 11002        | 12828        | 1481        | 38521        | 630803        | C                                                    | C        | C        | C        | C        | C        | C        | C        | C                 |
| C*02:02:02                                               | 02:02:02               |           | 02:02:02G                                     | 1063         | 777         | 25582         | 388          | 4435         | 514         | 3490         | 36249         | C                                                    | C        | C        | C        | C        | C        | C        | C        | C                 |
| C*02:02:02:01                                            | 02:02:02:01            | HLA00405  | 02:02:02G                                     | 416          | 230         | 5576          | 84           | 1597         | 172         | 852          | 8927          | C                                                    | C        | C        | C        | C        | C        | C        | C        | C                 |
| C*02:02:02:02                                            | 02:02:02:02            | HLA10679  | 02:02:02G                                     | 11           | 1           | 399           | 1            | 43           | 1           | 47           | 503           | WD                                                   |          | I        |          | I        |          | I        | I        | I                 |
| C*02:02:02:03                                            | 02:02:02:03            | HLA14843  | 02:02:02G                                     | 0            | 0           | 38            | 0            | 0            | 0           | 0            | 38            |                                                      |          | WD       |          |          |          |          | WD       | WD                |
| C*02:02:02:04                                            | 02:02:02:04            | HLA15769  | 02:02:02G                                     | 0            | 0           | 1             | 0            | 0            | 0           | 0            | 1             |                                                      |          |          |          |          |          |          |          |                   |
| C*02:02:02:06                                            | 02:02:02:06            | HLA16698  | 02:02:02G                                     | 0            | 0           | 7             | 0            | 0            | 0           | 0            | 7             |                                                      |          | WD       |          |          |          |          | WD       | WD                |
| C*02:02:02:10                                            | 02:02:02:10            | HLA16702  | 02:02:02G                                     | 0            | 1           | 0             | 0            | 0            | 0           | 0            | 1             |                                                      |          |          |          |          |          |          |          |                   |
| C*02:02:02:12                                            | 02:02:02:12            | HLA17059  | 02:02:02G                                     | 0            | 0           | 1             | 0            | 3            | 0           | 0            | 4             |                                                      |          |          |          |          |          |          |          |                   |
| C*02:02:02:13                                            | 02:02:02:13            | HLA17160  | 02:02:02G                                     | 0            | 0           | 1             | 0            | 0            | 0           | 0            | 1             |                                                      |          |          |          |          |          |          |          |                   |
| C*02:29                                                  | 02:29                  | HLA04016  | 02:02:02G                                     | 0            | 1           | 33            | 0            | 3            | 0           | 6            | 43            |                                                      |          | WD       |          |          |          | WD       | WD       | WD                |



| Supplemental Table 10: HLA-C Allele Summary <sup>a</sup> |                        |           |           | Allele Count by Population Group <sup>b</sup> |            |             |            |             |            |             |              | 3.0.0 CIWD Category by Population Group <sup>c</sup> |          |          |          |          |          |          |          |                   |
|----------------------------------------------------------|------------------------|-----------|-----------|-----------------------------------------------|------------|-------------|------------|-------------|------------|-------------|--------------|------------------------------------------------------|----------|----------|----------|----------|----------|----------|----------|-------------------|
| Allele                                                   | Genomic typing         | Allele ID | G group   | AFA                                           | API        | EURO        | MENA       | HIS         | NAM        | UNK         | Total        | AFA                                                  | API      | EURO     | MENA     | HIS      | NAM      | UNK      | Total    | Highest Frequency |
| C*02:69                                                  | 02:69                  | HLA09921  | 02:02:02G | 0                                             | 0          | 1           | 0          | 0           | 0          | 0           | 1            |                                                      |          |          |          |          |          |          |          |                   |
| C*02:83                                                  | 02:83                  | HLA11764  | 02:02:02G | 0                                             | 0          | 2           | 1          | 0           | 0          | 0           | 3            |                                                      |          |          |          |          |          |          |          |                   |
| C*02:02:03                                               | 02:02:03               | HLA00406  |           | 0                                             | 0          | 69          | 21         | 2           | 0          | 7           | 99           |                                                      |          | WD       | WD       |          |          | WD       | WD       | WD                |
| C*02:02:05                                               | 02:02:05               | HLA01471  |           | 0                                             | 0          | 0           | 0          | 0           | 0          | 1           | 1            |                                                      |          |          |          |          |          |          |          |                   |
| C*02:02:06                                               | 02:02:06               | HLA03081  |           | 0                                             | 0          | 11          | 0          | 0           | 0          | 0           | 11           |                                                      |          | WD       |          |          |          |          | WD       | WD                |
| C*02:02:07                                               | 02:02:07               | HLA03731  |           | 0                                             | 4          | 156         | 0          | 1           | 1          | 7           | 169          |                                                      |          | I        |          |          |          | WD       | I        | I                 |
| C*02:02:08                                               | 02:02:08               | HLA03826  |           | 0                                             | 0          | 47          | 0          | 0           | 0          | 0           | 47           |                                                      |          | WD       |          |          |          |          | WD       | WD                |
| C*02:02:09                                               | 02:02:09               | HLA04593  |           | 0                                             | 0          | 53          | 0          | 0           | 0          | 0           | 53           |                                                      |          | WD       |          |          |          |          | WD       | WD                |
| C*02:02:12                                               | 02:02:12               | HLA05210  |           | 0                                             | 0          | 8           | 0          | 0           | 0          | 0           | 8            |                                                      |          | WD       |          |          |          |          | WD       | WD                |
| C*02:02:14                                               | 02:02:14               | HLA05567  |           | 0                                             | 0          | 2           | 0          | 0           | 0          | 3           | 5            |                                                      |          |          |          |          |          |          | WD       | WD                |
| C*02:02:15                                               | 02:02:15               | HLA05594  |           | 0                                             | 0          | 0           | 1          | 0           | 0          | 0           | 1            |                                                      |          |          |          |          |          |          |          |                   |
| C*02:02:16                                               | 02:02:16               | HLA05606  |           | 0                                             | 0          | 0           | 0          | 2           | 0          | 0           | 2            |                                                      |          |          |          |          |          |          |          |                   |
| C*02:02:18                                               | 02:02:18               | HLA06710  |           | 0                                             | 0          | 7           | 0          | 0           | 0          | 0           | 7            |                                                      |          | WD       |          |          |          |          | WD       | WD                |
| C*02:02:19                                               | 02:02:19               | HLA06723  |           | 0                                             | 0          | 3           | 0          | 0           | 0          | 0           | 3            |                                                      |          |          |          |          |          |          |          |                   |
| C*02:02:20                                               | 02:02:20               | HLA06736  |           | 0                                             | 0          | 1           | 0          | 0           | 0          | 0           | 1            |                                                      |          |          |          |          |          |          |          |                   |
| C*02:02:22                                               | 02:02:22               | HLA07237  |           | 0                                             | 0          | 3           | 0          | 0           | 0          | 0           | 3            |                                                      |          |          |          |          |          |          |          |                   |
| C*02:02:23                                               | 02:02:23               | HLA08165  |           | 0                                             | 0          | 3           | 0          | 0           | 0          | 0           | 3            |                                                      |          |          |          |          |          |          |          |                   |
| C*02:02:24                                               | 02:02:24               | HLA08210  |           | 0                                             | 0          | 4           | 0          | 0           | 0          | 0           | 4            |                                                      |          |          |          |          |          |          |          |                   |
| C*02:02:26                                               | 02:02:26               | HLA09202  |           | 0                                             | 0          | 1           | 0          | 0           | 0          | 0           | 1            |                                                      |          |          |          |          |          |          |          |                   |
| C*02:02:27                                               | 02:02:27               | HLA11867  |           | 0                                             | 0          | 2           | 0          | 1           | 0          | 0           | 3            |                                                      |          |          |          |          |          |          |          |                   |
| C*02:02:28                                               | 02:02:28               | HLA12195  |           | 0                                             | 0          | 1           | 0          | 0           | 0          | 0           | 1            |                                                      |          |          |          |          |          |          |          |                   |
| <b>C*02:10 total</b>                                     | <b>02:10 total</b>     |           |           | <b>22771</b>                                  | <b>227</b> | <b>6037</b> | <b>951</b> | <b>6240</b> | <b>805</b> | <b>6803</b> | <b>43834</b> | <b>C</b>                                             | <b>C</b> | <b>C</b> | <b>C</b> | <b>C</b> | <b>C</b> | <b>C</b> | <b>C</b> | <b>C</b>          |
| C*02:10                                                  | 02:10                  |           |           | 18076                                         | 150        | 3857        | 811        | 4664        | 666        | 4840        | 33064        | C                                                    | C        | C        | C        | C        | C        | C        | C        | C                 |
| <b>C*02:10:01G total</b>                                 | <b>02:10:01G total</b> |           |           | <b>4695</b>                                   | <b>77</b>  | <b>2180</b> | <b>140</b> | <b>1576</b> | <b>139</b> | <b>1963</b> | <b>10770</b> | <b>C</b>                                             | <b>I</b> | <b>C</b> | <b>C</b> | <b>C</b> | <b>C</b> | <b>C</b> | <b>C</b> | <b>C</b>          |
| C*02:10:01G                                              | 02:10:01G              |           | 02:10:01G | 2214                                          | 59         | 1876        | 107        | 588         | 10         | 1231        | 6085         | C                                                    | I        | C        | C        | C        | C        | C        | C        | C                 |
| C*02:10:01                                               | 02:10:01               |           | 02:10:01G | 828                                           | 7          | 101         | 24         | 347         | 31         | 322         | 1660         | C                                                    | WD       | WD       | WD       | C        | C        | C        | C        | C                 |
| C*02:10:01:01                                            | 02:10:01:01            | HLA02120  | 02:10:01G | 1537                                          | 11         | 188         | 9          | 599         | 92         | 386         | 2822         | C                                                    | WD       | I        | WD       | C        | C        | C        | C        | C                 |
| C*02:10:01:02                                            | 02:10:01:02            | HLA14218  | 02:10:01G | 116                                           | 0          | 15          | 0          | 41          | 5          | 23          | 200          | C                                                    |          | WD       |          | I        | WD       | I        | I        | C                 |
| C*02:10:01:03                                            | 02:10:01:03            | HLA14809  | 02:10:01G | 0                                             | 0          | 0           | 0          | 1           | 1          | 1           | 3            |                                                      |          |          |          |          |          |          |          |                   |
| C*02:03                                                  | 02:03                  | HLA00408  |           | 4                                             | 0          | 20          | 0          | 0           | 0          | 3           | 27           |                                                      |          | WD       |          |          |          |          | WD       | WD                |
| C*02:04                                                  | 02:04                  | HLA01344  |           | 0                                             | 0          | 6           | 0          | 4           | 5          | 3           | 18           |                                                      |          | WD       |          |          | WD       |          | WD       | WD                |

| Supplemental Table 10: HLA-C Allele Summary <sup>a</sup> |                        |           | Allele Count by Population Group <sup>b</sup> |            |          |             |          |           |          |           |             | 3.0.0 CIWD Category by Population Group <sup>c</sup> |     |           |      |          |     |          |           |                   |  |
|----------------------------------------------------------|------------------------|-----------|-----------------------------------------------|------------|----------|-------------|----------|-----------|----------|-----------|-------------|------------------------------------------------------|-----|-----------|------|----------|-----|----------|-----------|-------------------|--|
| Allele                                                   | Genomic typing         | Allele ID | G group                                       | AFA        | API      | EURO        | MENA     | HIS       | NAM      | UNK       | Total       | AFA                                                  | API | EURO      | MENA | HIS      | NAM | UNK      | Total     | Highest Frequency |  |
| <b>C*02:05 total</b>                                     | <b>02:05 total</b>     |           |                                               | <b>4</b>   | <b>0</b> | <b>4</b>    | <b>0</b> | <b>0</b>  | <b>0</b> | <b>2</b>  | <b>10</b>   |                                                      |     |           |      |          |     |          | <b>WD</b> | <b>WD</b>         |  |
| C*02:05                                                  | 02:05                  |           |                                               | 0          | 0        | 0           | 0        | 0         | 0        | 1         | 1           |                                                      |     |           |      |          |     |          |           |                   |  |
| C*02:05:02                                               | 02:05:02               | HLA10259  |                                               | 4          | 0        | 2           | 0        | 0         | 0        | 0         | 6           |                                                      |     |           |      |          |     |          | WD        | WD                |  |
| C*02:05:03                                               | 02:05:03               | HLA10640  |                                               | 0          | 0        | 2           | 0        | 0         | 0        | 1         | 3           |                                                      |     |           |      |          |     |          |           |                   |  |
| <b>C*02:06 total</b>                                     | <b>02:06 total</b>     |           |                                               | <b>3</b>   | <b>2</b> | <b>1115</b> | <b>0</b> | <b>11</b> | <b>3</b> | <b>31</b> | <b>1165</b> |                                                      |     | I         |      | I        |     | I        | I         | I                 |  |
| C*02:06                                                  | 02:06                  |           |                                               | 1          | 1        | 742         | 0        | 10        | 3        | 26        | 783         |                                                      |     | I         |      | I        |     | I        | I         | I                 |  |
| C*02:06:01                                               | 02:06:01               | HLA01673  |                                               | 2          | 1        | 373         | 0        | 1         | 0        | 5         | 382         |                                                      |     | I         |      |          |     | WD       | I         | I                 |  |
| C*02:07                                                  | 02:07                  | HLA01715  |                                               | 2          | 1        | 187         | 31       | 32        | 0        | 29        | 282         |                                                      |     | I         | WD   | I        |     | I        | I         | I                 |  |
| C*02:08                                                  | 02:08                  | HLA01739  |                                               | 0          | 85       | 113         | 15       | 11        | 0        | 13        | 237         |                                                      | I   | WD        | WD   | I        |     | WD       | I         | I                 |  |
| C*02:11                                                  | 02:11                  | HLA02170  |                                               | 0          | 0        | 1           | 0        | 0         | 0        | 0         | 1           |                                                      |     |           |      |          |     |          |           |                   |  |
| C*02:12                                                  | 02:12                  | HLA02240  |                                               | 9          | 0        | 0           | 0        | 0         | 0        | 2         | 11          | WD                                                   |     |           |      |          |     |          | WD        | WD                |  |
| C*02:13                                                  | 02:13                  | HLA02423  |                                               | 0          | 1        | 36          | 3        | 0         | 0        | 1         | 41          |                                                      |     | WD        |      |          |     |          | WD        | WD                |  |
| <b>C*02:14 total</b>                                     | <b>02:14 total</b>     |           |                                               | <b>201</b> | <b>0</b> | <b>10</b>   | <b>0</b> | <b>13</b> | <b>0</b> | <b>47</b> | <b>271</b>  | <b>C</b>                                             |     | <b>WD</b> |      | <b>I</b> |     | <b>I</b> | <b>I</b>  | <b>C</b>          |  |
| <b>C*02:14:01G total</b>                                 | <b>02:14:01G total</b> |           |                                               | <b>201</b> | <b>0</b> | <b>10</b>   | <b>0</b> | <b>13</b> | <b>0</b> | <b>47</b> | <b>271</b>  | <b>C</b>                                             |     | <b>WD</b> |      | <b>I</b> |     | <b>I</b> | <b>I</b>  | <b>C</b>          |  |
| C*02:14                                                  | 02:14                  |           | 02:14:01G                                     | 132        | 0        | 5           | 0        | 7         | 0        | 27        | 171         | C                                                    |     | WD        |      | I        |     | I        | I         | C                 |  |
| C*02:14:01G                                              | 02:14:01G              |           | 02:14:01G                                     | 27         | 0        | 5           | 0        | 3         | 0        | 8         | 43          | WD                                                   |     | WD        |      |          |     | WD       | WD        | WD                |  |
| C*02:14:01                                               | 02:14:01               | HLA02430  | 02:14:01G                                     | 12         | 0        | 0           | 0        | 2         | 0        | 1         | 15          | WD                                                   |     |           |      |          |     |          | WD        | WD                |  |
| C*02:14:02                                               | 02:14:02               | HLA12913  | 02:14:01G                                     | 30         | 0        | 0           | 0        | 1         | 0        | 11        | 42          | WD                                                   |     |           |      |          |     | WD       | WD        | WD                |  |
| C*02:15                                                  | 02:15                  | HLA02559  |                                               | 0          | 0        | 1           | 0        | 0         | 0        | 1         | 2           |                                                      |     |           |      |          |     |          |           |                   |  |
| <b>C*02:16 total</b>                                     | <b>02:16 total</b>     |           |                                               | <b>7</b>   | <b>1</b> | <b>69</b>   | <b>3</b> | <b>0</b>  | <b>0</b> | <b>4</b>  | <b>84</b>   | <b>WD</b>                                            |     | <b>WD</b> |      |          |     |          | <b>WD</b> | <b>WD</b>         |  |
| C*02:16                                                  | 02:16                  |           |                                               | 0          | 0        | 4           | 2        | 0         | 0        | 0         | 6           |                                                      |     |           |      |          |     |          | WD        | WD                |  |
| C*02:16:01                                               | 02:16:01               |           |                                               | 7          | 0        | 0           | 0        | 0         | 0        | 3         | 10          | WD                                                   |     |           |      |          |     |          | WD        | WD                |  |
| C*02:16:02                                               | 02:16:02               | HLA03589  |                                               | 0          | 1        | 65          | 1        | 0         | 0        | 1         | 68          |                                                      |     | WD        |      |          |     |          | WD        | WD                |  |
| C*02:17                                                  | 02:17                  | HLA02764  |                                               | 3          | 0        | 0           | 0        | 0         | 0        | 0         | 3           |                                                      |     |           |      |          |     |          |           |                   |  |
| C*02:19                                                  | 02:19                  | HLA03024  |                                               | 0          | 0        | 61          | 0        | 0         | 0        | 46        | 107         |                                                      |     | WD        |      |          |     | I        | WD        | I                 |  |
| C*02:20                                                  | 02:20                  | HLA03079  |                                               | 0          | 0        | 1           | 0        | 0         | 0        | 0         | 1           |                                                      |     |           |      |          |     |          |           |                   |  |
| C*02:21                                                  | 02:21                  | HLA03252  |                                               | 0          | 0        | 9           | 6        | 8         | 0        | 31        | 54          |                                                      |     | WD        | WD   | I        |     | I        | WD        | I                 |  |
| C*02:23                                                  | 02:23                  | HLA03539  |                                               | 0          | 0        | 11          | 0        | 0         | 0        | 0         | 11          |                                                      |     | WD        |      |          |     |          | WD        | WD                |  |
| C*02:24                                                  | 02:24                  | HLA03728  |                                               | 0          | 0        | 26          | 0        | 0         | 0        | 0         | 26          |                                                      |     | WD        |      |          |     |          | WD        | WD                |  |
| C*02:25Q                                                 | 02:25Q                 | HLA03739  |                                               | 0          | 0        | 13          | 0        | 0         | 0        | 0         | 13          |                                                      |     | WD        |      |          |     |          | WD        | WD                |  |
| <b>C*02:26 total</b>                                     | <b>02:26 total</b>     |           |                                               | <b>2</b>   | <b>1</b> | <b>21</b>   | <b>3</b> | <b>4</b>  | <b>2</b> | <b>28</b> | <b>61</b>   |                                                      |     | <b>WD</b> |      |          |     | <b>I</b> | <b>WD</b> | <b>I</b>          |  |

| Supplemental Table 10: HLA-C Allele Summary <sup>a</sup> |                    |           | Allele Count by Population Group <sup>b</sup> |           |          |           |          |           |          |          |           |           | 3.0.0 CIWD Category by Population Group <sup>c</sup> |           |      |          |     |           |           |                   |
|----------------------------------------------------------|--------------------|-----------|-----------------------------------------------|-----------|----------|-----------|----------|-----------|----------|----------|-----------|-----------|------------------------------------------------------|-----------|------|----------|-----|-----------|-----------|-------------------|
| Allele                                                   | Genomic typing     | Allele ID | G group                                       | AFA       | API      | EURO      | MENA     | HIS       | NAM      | UNK      | Total     | AFA       | API                                                  | EURO      | MENA | HIS      | NAM | UNK       | Total     | Highest Frequency |
| C*02:26                                                  | 02:26              |           |                                               | 0         | 0        | 1         | 0        | 1         | 0        | 1        | 3         |           |                                                      |           |      |          |     |           |           |                   |
| C*02:26:01                                               | 02:26:01           | HLA03704  |                                               | 1         | 0        | 9         | 0        | 0         | 0        | 8        | 18        |           |                                                      | WD        |      |          |     | WD        | WD        | WD                |
| C*02:26:02                                               | 02:26:02           | HLA04699  |                                               | 0         | 1        | 10        | 0        | 3         | 2        | 5        | 21        |           |                                                      | WD        |      |          |     | WD        | WD        | WD                |
| C*02:26:03                                               | 02:26:03           | HLA06397  |                                               | 1         | 0        | 1         | 3        | 0         | 0        | 14       | 19        |           |                                                      |           |      |          |     | I         | WD        | I                 |
| <b>C*02:27 total</b>                                     | <b>02:27 total</b> |           |                                               | <b>14</b> | <b>0</b> | <b>28</b> | <b>0</b> | <b>11</b> | <b>0</b> | <b>6</b> | <b>59</b> | <b>WD</b> |                                                      | <b>WD</b> |      | <b>I</b> |     | <b>WD</b> | <b>WD</b> | <b>I</b>          |
| C*02:27                                                  | 02:27              |           |                                               | 1         | 0        | 4         | 0        | 3         | 0        | 0        | 8         |           |                                                      |           |      |          |     |           | WD        | WD                |
| C*02:27:01                                               | 02:27:01           | HLA03705  |                                               | 13        | 0        | 23        | 0        | 8         | 0        | 6        | 50        | WD        |                                                      | WD        |      | I        |     | WD        | WD        | I                 |
| C*02:27:02                                               | 02:27:02           | HLA05139  |                                               | 0         | 0        | 1         | 0        | 0         | 0        | 0        | 1         |           |                                                      |           |      |          |     |           |           |                   |
| C*02:28                                                  | 02:28              | HLA03801  |                                               | 0         | 0        | 0         | 0        | 0         | 0        | 4        | 4         |           |                                                      |           |      |          |     |           |           |                   |
| C*02:30                                                  | 02:30              | HLA04277  |                                               | 0         | 0        | 17        | 0        | 0         | 0        | 0        | 17        |           |                                                      | WD        |      |          |     |           | WD        | WD                |
| C*02:31                                                  | 02:31              | HLA04284  |                                               | 0         | 0        | 9         | 1        | 1         | 0        | 3        | 14        |           |                                                      | WD        |      |          |     |           | WD        | WD                |
| C*02:32                                                  | 02:32              | HLA04764  |                                               | 0         | 0        | 8         | 0        | 0         | 0        | 0        | 8         |           |                                                      | WD        |      |          |     |           | WD        | WD                |
| C*02:34                                                  | 02:34              | HLA04823  |                                               | 0         | 0        | 5         | 0        | 0         | 0        | 1        | 6         |           |                                                      | WD        |      |          |     |           | WD        | WD                |
| C*02:35                                                  | 02:35              | HLA04830  |                                               | 0         | 0        | 4         | 0        | 0         | 0        | 7        | 11        |           |                                                      |           |      |          |     |           | WD        | WD                |
| <b>C*02:36 total</b>                                     | <b>02:36 total</b> |           |                                               | <b>0</b>  | <b>0</b> | <b>1</b>  | <b>0</b> | <b>0</b>  | <b>0</b> | <b>0</b> | <b>1</b>  |           |                                                      |           |      |          |     |           |           |                   |
| C*02:36                                                  | 02:36              |           |                                               | 0         | 0        | 1         | 0        | 0         | 0        | 0        | 1         |           |                                                      |           |      |          |     |           |           |                   |
| C*02:38N                                                 | 02:38N             | HLA05189  |                                               | 0         | 0        | 56        | 0        | 0         | 0        | 0        | 56        |           |                                                      | WD        |      |          |     |           | WD        | WD                |
| <b>C*02:40 total</b>                                     | <b>02:40 total</b> |           |                                               | <b>0</b>  | <b>0</b> | <b>15</b> | <b>0</b> | <b>0</b>  | <b>1</b> | <b>0</b> | <b>16</b> |           |                                                      | <b>WD</b> |      |          |     |           | <b>WD</b> | <b>WD</b>         |
| C*02:40                                                  | 02:40              |           |                                               | 0         | 0        | 4         | 0        | 0         | 0        | 0        | 4         |           |                                                      |           |      |          |     |           |           |                   |
| C*02:40:01                                               | 02:40:01           | HLA05311  |                                               | 0         | 0        | 11        | 0        | 0         | 0        | 0        | 11        |           |                                                      | WD        |      |          |     |           | WD        | WD                |
| C*02:40:02                                               | 02:40:02           | HLA11665  |                                               | 0         | 0        | 0         | 0        | 0         | 1        | 0        | 1         |           |                                                      |           |      |          |     |           |           |                   |
| <b>C*02:43 total</b>                                     | <b>02:43 total</b> |           |                                               | <b>0</b>  | <b>0</b> | <b>10</b> | <b>0</b> | <b>0</b>  | <b>0</b> | <b>2</b> | <b>12</b> |           |                                                      | <b>WD</b> |      |          |     |           | <b>WD</b> | <b>WD</b>         |
| C*02:43                                                  | 02:43              |           |                                               | 0         | 0        | 9         | 0        | 0         | 0        | 2        | 11        |           |                                                      | WD        |      |          |     |           | WD        | WD                |
| C*02:43:01                                               | 02:43:01           | HLA05584  |                                               | 0         | 0        | 1         | 0        | 0         | 0        | 0        | 1         |           |                                                      |           |      |          |     |           |           |                   |
| C*02:44                                                  | 02:44              | HLA05618  |                                               | 0         | 0        | 14        | 0        | 1         | 0        | 1        | 16        |           |                                                      | WD        |      |          |     |           | WD        | WD                |
| C*02:45                                                  | 02:45              | HLA05733  |                                               | 0         | 0        | 2         | 4        | 0         | 0        | 1        | 7         |           |                                                      |           |      |          |     |           | WD        | WD                |
| C*02:46                                                  | 02:46              | HLA05735  |                                               | 0         | 0        | 5         | 0        | 6         | 0        | 3        | 14        |           |                                                      | WD        |      | WD       |     |           | WD        | WD                |
| C*02:48                                                  | 02:48              | HLA06724  |                                               | 0         | 0        | 5         | 0        | 0         | 0        | 0        | 5         |           |                                                      | WD        |      |          |     |           | WD        | WD                |
| C*02:49                                                  | 02:49              | HLA06898  |                                               | 8         | 0        | 1         | 0        | 0         | 0        | 0        | 9         | WD        |                                                      |           |      |          |     |           | WD        | WD                |
| C*02:51                                                  | 02:51              | HLA07020  |                                               | 0         | 0        | 4         | 0        | 0         | 0        | 0        | 4         |           |                                                      |           |      |          |     |           |           |                   |
| <b>C*02:53 total</b>                                     | <b>02:53 total</b> |           |                                               | <b>0</b>  | <b>0</b> | <b>1</b>  | <b>0</b> | <b>0</b>  | <b>0</b> | <b>0</b> | <b>1</b>  |           |                                                      |           |      |          |     |           |           |                   |

| Supplemental Table 10: HLA-C Allele Summary <sup>a</sup> |                    |           | Allele Count by Population Group <sup>b</sup> |          |          |           |          |          |          |          |           | 3.0.0 CIWD Category by Population Group <sup>c</sup> |     |           |      |     |     |     |           |                   |
|----------------------------------------------------------|--------------------|-----------|-----------------------------------------------|----------|----------|-----------|----------|----------|----------|----------|-----------|------------------------------------------------------|-----|-----------|------|-----|-----|-----|-----------|-------------------|
| Allele                                                   | Genomic typing     | Allele ID | G group                                       | AFA      | API      | EURO      | MENA     | HIS      | NAM      | UNK      | Total     | AFA                                                  | API | EURO      | MENA | HIS | NAM | UNK | Total     | Highest Frequency |
| C*02:53                                                  | 02:53              |           |                                               | 0        | 0        | 1         | 0        | 0        | 0        | 0        | 1         |                                                      |     |           |      |     |     |     |           |                   |
| C*02:54                                                  | 02:54              | HLA07236  |                                               | 0        | 0        | 1         | 0        | 0        | 0        | 0        | 1         |                                                      |     |           |      |     |     |     |           |                   |
| <b>C*02:55 total</b>                                     | <b>02:55 total</b> |           |                                               | <b>2</b> | <b>0</b> | <b>13</b> | <b>0</b> | <b>0</b> | <b>0</b> | <b>0</b> | <b>15</b> |                                                      |     | <b>WD</b> |      |     |     |     | <b>WD</b> | <b>WD</b>         |
| C*02:55                                                  | 02:55              |           |                                               | 1        | 0        | 7         | 0        | 0        | 0        | 0        | 8         |                                                      |     | WD        |      |     |     |     | WD        | WD                |
| C*02:55:01                                               | 02:55:01           | HLA07360  |                                               | 0        | 0        | 5         | 0        | 0        | 0        | 0        | 5         |                                                      |     | WD        |      |     |     |     | WD        | WD                |
| C*02:55:02                                               | 02:55:02           | HLA14029  |                                               | 1        | 0        | 1         | 0        | 0        | 0        | 0        | 2         |                                                      |     |           |      |     |     |     |           |                   |
| C*02:56                                                  | 02:56              | HLA07493  |                                               | 0        | 0        | 19        | 0        | 0        | 0        | 1        | 20        |                                                      |     | WD        |      |     |     |     | WD        | WD                |
| C*02:57                                                  | 02:57              | HLA07944  |                                               | 0        | 0        | 2         | 0        | 0        | 0        | 0        | 2         |                                                      |     |           |      |     |     |     |           |                   |
| C*02:60                                                  | 02:60              | HLA08209  |                                               | 0        | 0        | 3         | 0        | 0        | 0        | 0        | 3         |                                                      |     |           |      |     |     |     |           |                   |
| C*02:62                                                  | 02:62              | HLA08212  |                                               | 0        | 0        | 1         | 0        | 0        | 0        | 1        | 2         |                                                      |     |           |      |     |     |     |           |                   |
| C*02:64                                                  | 02:64              | HLA08533  |                                               | 0        | 0        | 4         | 0        | 0        | 0        | 0        | 4         |                                                      |     |           |      |     |     |     |           |                   |
| C*02:67Q                                                 | 02:67Q             | HLA09035  |                                               | 0        | 0        | 5         | 0        | 0        | 0        | 2        | 7         |                                                      |     | WD        |      |     |     |     | WD        | WD                |
| C*02:73                                                  | 02:73              | HLA10438  |                                               | 1        | 0        | 0         | 0        | 0        | 0        | 1        | 2         |                                                      |     |           |      |     |     |     |           |                   |
| C*02:74                                                  | 02:74              | HLA10439  |                                               | 0        | 0        | 1         | 0        | 1        | 0        | 0        | 2         |                                                      |     |           |      |     |     |     |           |                   |
| C*02:75                                                  | 02:75              | HLA11106  |                                               | 0        | 0        | 1         | 0        | 0        | 0        | 0        | 1         |                                                      |     |           |      |     |     |     |           |                   |
| C*02:76                                                  | 02:76              | HLA11107  |                                               | 2        | 0        | 0         | 0        | 0        | 0        | 0        | 2         |                                                      |     |           |      |     |     |     |           |                   |
| C*02:77                                                  | 02:77              | HLA11108  |                                               | 0        | 0        | 2         | 0        | 0        | 0        | 0        | 2         |                                                      |     |           |      |     |     |     |           |                   |
| C*02:78                                                  | 02:78              | HLA11109  |                                               | 0        | 0        | 1         | 0        | 0        | 0        | 0        | 1         |                                                      |     |           |      |     |     |     |           |                   |
| C*02:80                                                  | 02:80              | HLA11122  |                                               | 0        | 0        | 2         | 0        | 0        | 0        | 0        | 2         |                                                      |     |           |      |     |     |     |           |                   |
| C*02:81                                                  | 02:81              | HLA11260  |                                               | 0        | 0        | 4         | 0        | 0        | 0        | 0        | 4         |                                                      |     |           |      |     |     |     |           |                   |
| C*02:84                                                  | 02:84              | HLA11868  |                                               | 0        | 0        | 1         | 0        | 0        | 0        | 0        | 1         |                                                      |     |           |      |     |     |     |           |                   |
| C*02:85                                                  | 02:85              | HLA12093  |                                               | 0        | 0        | 3         | 0        | 0        | 0        | 0        | 3         |                                                      |     |           |      |     |     |     |           |                   |
| C*02:86                                                  | 02:86              | HLA12095  |                                               | 0        | 0        | 0         | 1        | 0        | 0        | 0        | 1         |                                                      |     |           |      |     |     |     |           |                   |
| C*02:87                                                  | 02:87              | HLA12186  |                                               | 0        | 0        | 5         | 0        | 0        | 0        | 0        | 5         |                                                      |     | WD        |      |     |     |     | WD        | WD                |
| C*02:91                                                  | 02:91              | HLA12708  |                                               | 0        | 0        | 0         | 2        | 0        | 0        | 0        | 2         |                                                      |     |           |      |     |     |     |           |                   |
| C*02:92N                                                 | 02:92N             | HLA12731  |                                               | 0        | 0        | 17        | 0        | 0        | 0        | 0        | 17        |                                                      |     | WD        |      |     |     |     | WD        | WD                |
| C*02:93                                                  | 02:93              | HLA12779  |                                               | 0        | 0        | 2         | 0        | 0        | 0        | 0        | 2         |                                                      |     |           |      |     |     |     |           |                   |
| C*02:94                                                  | 02:94              | HLA12778  |                                               | 1        | 0        | 0         | 0        | 0        | 0        | 0        | 1         |                                                      |     |           |      |     |     |     |           |                   |
| C*02:96                                                  | 02:96              | HLA13109  |                                               | 0        | 0        | 0         | 0        | 1        | 0        | 0        | 1         |                                                      |     |           |      |     |     |     |           |                   |
| C*02:97                                                  | 02:97              | HLA13110  |                                               | 0        | 0        | 0         | 0        | 1        | 1        | 0        | 2         |                                                      |     |           |      |     |     |     |           |                   |
| C*02:98                                                  | 02:98              | HLA13111  |                                               | 0        | 0        | 4         | 0        | 0        | 0        | 0        | 4         |                                                      |     |           |      |     |     |     |           |                   |

| Supplemental Table 10: HLA-C Allele Summary <sup>a</sup> |                        |           | Allele Count by Population Group <sup>b</sup> |             |              |               |             |              |             |              |               | 3.0.0 CIWD Category by Population Group <sup>c</sup> |          |          |          |          |          |          |          |                   |
|----------------------------------------------------------|------------------------|-----------|-----------------------------------------------|-------------|--------------|---------------|-------------|--------------|-------------|--------------|---------------|------------------------------------------------------|----------|----------|----------|----------|----------|----------|----------|-------------------|
| Allele                                                   | Genomic typing         | Allele ID | G group                                       | AFA         | API          | EURO          | MENA        | HIS          | NAM         | UNK          | Total         | AFA                                                  | API      | EURO     | MENA     | HIS      | NAM      | UNK      | Total    | Highest Frequency |
| C*02:104                                                 | 02:104                 | HLA13568  |                                               | 0           | 0            | 2             | 0           | 0            | 0           | 0            | 2             |                                                      |          |          |          |          |          |          |          |                   |
| C*02:107                                                 | 02:107                 | HLA13867  |                                               | 0           | 0            | 1             | 0           | 0            | 0           | 0            | 1             |                                                      |          |          |          |          |          |          |          |                   |
| C*02:109                                                 | 02:109                 | HLA14335  |                                               | 0           | 0            | 1             | 0           | 0            | 0           | 0            | 1             |                                                      |          |          |          |          |          |          |          |                   |
| C*02:112                                                 | 02:112                 | HLA14538  |                                               | 0           | 1            | 0             | 0           | 0            | 0           | 0            | 1             |                                                      |          |          |          |          |          |          |          |                   |
| C*02:114                                                 | 02:114                 | HLA14753  |                                               | 0           | 1            | 0             | 0           | 0            | 0           | 0            | 1             |                                                      |          |          |          |          |          |          |          |                   |
| C*02:117                                                 | 02:117                 | HLA15056  |                                               | 0           | 1            | 0             | 0           | 0            | 0           | 0            | 1             |                                                      |          |          |          |          |          |          |          |                   |
| C*02:CODE                                                | 02:CODE                |           |                                               | 2682        | 510          | 65389         | 623         | 3539         | 455         | 6319         | 79517         | NA                                                   | NA       | NA       | NA       | NA       | NA       | NA       | NA       | NA                |
| <b>C*03:02 total</b>                                     | <b>03:02 total</b>     |           |                                               | <b>6523</b> | <b>62962</b> | <b>37989</b>  | <b>5253</b> | <b>2552</b>  | <b>411</b>  | <b>8409</b>  | <b>124099</b> | <b>C</b>                                             | <b>C</b> | <b>C</b> | <b>C</b> | <b>C</b> | <b>C</b> | <b>C</b> | <b>C</b> | <b>C</b>          |
| C*03:02                                                  | 03:02                  |           |                                               | 566         | 2206         | 2857          | 310         | 249          | 44          | 1307         | 7539          | C                                                    | C        | C        | C        | C        | C        | C        | C        | C                 |
| C*03:02P                                                 | 03:02P                 |           |                                               | 1           | 0            | 93            | 0           | 1            | 0           | 1            | 96            |                                                      |          | WD       |          |          |          |          | WD       | WD                |
| <b>C*03:02:01G total</b>                                 | <b>03:02:01G total</b> |           |                                               | <b>5956</b> | <b>60734</b> | <b>35038</b>  | <b>4942</b> | <b>2302</b>  | <b>367</b>  | <b>7101</b>  | <b>116440</b> | <b>C</b>                                             | <b>C</b> | <b>C</b> | <b>C</b> | <b>C</b> | <b>C</b> | <b>C</b> | <b>C</b> | <b>C</b>          |
| C*03:02:01G                                              | 03:02:01G              |           | 03:02:01G                                     | 4781        | 55853        | 33889         | 4802        | 1703         | 273         | 6217         | 107518        | C                                                    | C        | C        | C        | C        | C        | C        | C        | C                 |
| C*03:02:01                                               | 03:02:01               | HLA00410  | 03:02:01G                                     | 0           | 0            | 0             | 0           | 0            | 0           | 1            | 1             |                                                      |          |          |          |          |          |          |          |                   |
| C*03:02:02                                               | 03:02:02               |           | 03:02:01G                                     | 298         | 1111         | 311           | 26          | 134          | 21          | 214          | 2115          | C                                                    | C        | I        | WD       | C        | C        | C        | C        | C                 |
| C*03:02:02:01                                            | 03:02:02:01            | HLA01543  | 03:02:01G                                     | 876         | 3672         | 767           | 111         | 448          | 73          | 652          | 6599          | C                                                    | C        | I        | C        | C        | C        | C        | C        | C                 |
| C*03:02:02:02                                            | 03:02:02:02            | HLA05731  | 03:02:01G                                     | 1           | 3            | 67            | 3           | 16           | 0           | 12           | 102           |                                                      |          | WD       |          | I        |          | WD       | WD       | I                 |
| C*03:02:02:03                                            | 03:02:02:03            | HLA09569  | 03:02:01G                                     | 0           | 55           | 1             | 0           | 0            | 0           | 4            | 60            |                                                      | I        |          |          |          |          |          | WD       | I                 |
| C*03:02:03                                               | 03:02:03               | HLA02800  | 03:02:01G                                     | 0           | 0            | 1             | 0           | 1            | 0           | 1            | 3             |                                                      |          |          |          |          |          |          |          |                   |
| C*03:02:07                                               | 03:02:07               | HLA06126  | 03:02:01G                                     | 0           | 0            | 2             | 0           | 0            | 0           | 0            | 2             |                                                      |          |          |          |          |          |          |          |                   |
| C*03:146                                                 | 03:146                 | HLA07814  | 03:02:01G                                     | 0           | 40           | 0             | 0           | 0            | 0           | 0            | 40            |                                                      | I        |          |          |          |          |          | WD       | I                 |
| C*03:02:05                                               | 03:02:05               | HLA04287  |                                               | 0           | 0            | 1             | 0           | 0            | 0           | 0            | 1             |                                                      |          |          |          |          |          |          |          |                   |
| C*03:02:06                                               | 03:02:06               | HLA04605  |                                               | 0           | 3            | 0             | 1           | 0            | 0           | 0            | 4             |                                                      |          |          |          |          |          |          |          |                   |
| C*03:02:09                                               | 03:02:09               | HLA07730  |                                               | 0           | 17           | 0             | 0           | 0            | 0           | 0            | 17            |                                                      | I        |          |          |          |          |          | WD       | I                 |
| C*03:02:10                                               | 03:02:10               | HLA09615  |                                               | 0           | 1            | 0             | 0           | 0            | 0           | 0            | 1             |                                                      |          |          |          |          |          |          |          |                   |
| C*03:02:13                                               | 03:02:13               | HLA11874  |                                               | 0           | 1            | 0             | 0           | 0            | 0           | 0            | 1             |                                                      |          |          |          |          |          |          |          |                   |
| <b>C*03:03 total</b>                                     | <b>03:03 total</b>     |           |                                               | <b>4500</b> | <b>31913</b> | <b>561294</b> | <b>6889</b> | <b>20513</b> | <b>1798</b> | <b>48297</b> | <b>675204</b> | <b>C</b>                                             | <b>C</b> | <b>C</b> | <b>C</b> | <b>C</b> | <b>C</b> | <b>C</b> | <b>C</b> | <b>C</b>          |
| C*03:03                                                  | 03:03                  |           |                                               | 15          | 11           | 2259          | 1           | 14           | 2           | 75           | 2377          | WD                                                   | WD       | C        |          | I        |          | I        | C        | C                 |
| C*03:03P                                                 | 03:03P                 |           |                                               | 0           | 0            | 498           | 2           | 2            | 0           | 1            | 503           |                                                      |          | I        |          |          |          |          | I        | I                 |
| <b>C*03:03:01G total</b>                                 | <b>03:03:01G total</b> |           |                                               | <b>4175</b> | <b>31744</b> | <b>558068</b> | <b>6876</b> | <b>20473</b> | <b>1783</b> | <b>48088</b> | <b>671207</b> | <b>C</b>                                             | <b>C</b> | <b>C</b> | <b>C</b> | <b>C</b> | <b>C</b> | <b>C</b> | <b>C</b> | <b>C</b>          |
| C*03:03:01G                                              | 03:03:01G              |           | 03:03:01G                                     | 3392        | 27856        | 532306        | 6721        | 15381        | 1365        | 44094        | 631115        | C                                                    | C        | C        | C        | C        | C        | C        | C        | C                 |
| C*03:03:01                                               | 03:03:01               |           | 03:03:01G                                     | 456         | 2286         | 13664         | 93          | 2879         | 234         | 2256         | 21868         | C                                                    | C        | C        | C        | C        | C        | C        | C        | C                 |

| Supplemental Table 10: HLA-C Allele Summary <sup>a</sup> |                        |           |           | Allele Count by Population Group <sup>b</sup> |              |               |             |              |             |              |               | 3.0.0 CIWD Category by Population Group <sup>c</sup> |          |          |          |          |          |          |          |                   |
|----------------------------------------------------------|------------------------|-----------|-----------|-----------------------------------------------|--------------|---------------|-------------|--------------|-------------|--------------|---------------|------------------------------------------------------|----------|----------|----------|----------|----------|----------|----------|-------------------|
| Allele                                                   | Genomic typing         | Allele ID | G group   | AFA                                           | API          | EURO          | MENA        | HIS          | NAM         | UNK          | Total         | AFA                                                  | API      | EURO     | MENA     | HIS      | NAM      | UNK      | Total    | Highest Frequency |
| C*03:03:01:01                                            | 03:03:01:01            | HLA00411  | 03:03:01G | 326                                           | 1602         | 12095         | 62          | 2213         | 184         | 1737         | 18219         | C                                                    | C        | C        | C        | C        | C        | C        | C        | C                 |
| C*03:03:01:04                                            | 03:03:01:04            | HLA16705  | 03:03:01G | 0                                             | 0            | 1             | 0           | 0            | 0           | 0            | 1             |                                                      |          |          |          |          |          |          |          |                   |
| C*03:03:01:06                                            | 03:03:01:06            | HLA16707  | 03:03:01G | 0                                             | 0            | 0             | 0           | 0            | 0           | 1            | 1             |                                                      |          |          |          |          |          |          |          |                   |
| C*03:03:17                                               | 03:03:17               | HLA07377  | 03:03:01G | 1                                             | 0            | 1             | 0           | 0            | 0           | 0            | 2             |                                                      |          |          |          |          |          |          |          |                   |
| C*03:171                                                 | 03:171                 | HLA08582  | 03:03:01G | 0                                             | 0            | 1             | 0           | 0            | 0           | 0            | 1             |                                                      |          |          |          |          |          |          |          |                   |
| C*03:03:02                                               | 03:03:02               | HLA00412  |           | 7                                             | 1            | 351           | 0           | 4            | 3           | 36           | 402           | WD                                                   |          | I        |          |          |          | I        | I        | I                 |
| C*03:03:03                                               | 03:03:03               | HLA01355  |           | 0                                             | 5            | 2             | 0           | 0            | 0           | 0            | 7             |                                                      | WD       |          |          |          |          |          | WD       | WD                |
| C*03:03:04                                               | 03:03:04               | HLA01855  |           | 300                                           | 58           | 36            | 9           | 14           | 10          | 81           | 508           | C                                                    | I        | WD       | WD       | I        | C        | I        | I        | C                 |
| C*03:03:05                                               | 03:03:05               | HLA02567  |           | 3                                             | 0            | 35            | 0           | 1            | 0           | 12           | 51            |                                                      |          | WD       |          |          |          | WD       | WD       | WD                |
| C*03:03:07                                               | 03:03:07               | HLA04264  |           | 0                                             | 0            | 28            | 0           | 0            | 0           | 0            | 28            |                                                      |          | WD       |          |          |          |          | WD       | WD                |
| C*03:03:10                                               | 03:03:10               | HLA04281  |           | 0                                             | 10           | 1             | 1           | 0            | 0           | 0            | 12            |                                                      | WD       |          |          |          |          |          | WD       | WD                |
| C*03:03:12                                               | 03:03:12               | HLA05215  |           | 0                                             | 80           | 2             | 0           | 0            | 0           | 0            | 82            |                                                      | I        |          |          |          |          |          | WD       | I                 |
| C*03:03:15                                               | 03:03:15               | HLA07024  |           | 0                                             | 1            | 0             | 0           | 0            | 0           | 0            | 1             |                                                      |          |          |          |          |          |          |          |                   |
| C*03:03:16                                               | 03:03:16               | HLA07025  |           | 0                                             | 0            | 5             | 0           | 3            | 0           | 3            | 11            |                                                      |          | WD       |          |          |          |          | WD       | WD                |
| C*03:03:19                                               | 03:03:19               | HLA07954  |           | 0                                             | 2            | 0             | 0           | 0            | 0           | 0            | 2             |                                                      |          |          |          |          |          |          |          |                   |
| C*03:03:20                                               | 03:03:20               | HLA09199  |           | 0                                             | 0            | 3             | 0           | 0            | 0           | 0            | 3             |                                                      |          |          |          |          |          |          |          |                   |
| C*03:03:21                                               | 03:03:21               | HLA09726  |           | 0                                             | 0            | 1             | 0           | 0            | 0           | 0            | 1             |                                                      |          |          |          |          |          |          |          |                   |
| C*03:03:25                                               | 03:03:25               | HLA11115  |           | 0                                             | 0            | 2             | 0           | 0            | 0           | 1            | 3             |                                                      |          |          |          |          |          |          |          |                   |
| C*03:03:27                                               | 03:03:27               | HLA12510  |           | 0                                             | 0            | 1             | 0           | 0            | 0           | 0            | 1             |                                                      |          |          |          |          |          |          |          |                   |
| C*03:03:29                                               | 03:03:29               | HLA13263  |           | 0                                             | 0            | 1             | 0           | 2            | 0           | 0            | 3             |                                                      |          |          |          |          |          |          |          |                   |
| C*03:03:30                                               | 03:03:30               | HLA14605  |           | 0                                             | 0            | 1             | 0           | 0            | 0           | 0            | 1             |                                                      |          |          |          |          |          |          |          |                   |
| C*03:03:31                                               | 03:03:31               | HLA14681  |           | 0                                             | 1            | 0             | 0           | 0            | 0           | 0            | 1             |                                                      |          |          |          |          |          |          |          |                   |
| <b>C*03:04 total</b>                                     | <b>03:04 total</b>     |           |           | <b>18307</b>                                  | <b>45715</b> | <b>774735</b> | <b>8219</b> | <b>39516</b> | <b>4170</b> | <b>77579</b> | <b>968241</b> | <b>C</b>                                             | <b>C</b> | <b>C</b> | <b>C</b> | <b>C</b> | <b>C</b> | <b>C</b> | <b>C</b> | <b>C</b>          |
| C*03:04                                                  | 03:04                  |           |           | 697                                           | 108          | 6796          | 69          | 309          | 48          | 615          | 8642          | C                                                    | I        | C        | C        | C        | C        | C        | C        | C                 |
| C*03:04P                                                 | 03:04P                 |           |           | 0                                             | 0            | 251           | 1           | 4            | 1           | 0            | 257           |                                                      |          | I        |          |          |          |          | I        | I                 |
| <b>C*03:04:01G total</b>                                 | <b>03:04:01G total</b> |           |           | <b>7432</b>                                   | <b>44595</b> | <b>765180</b> | <b>7493</b> | <b>37151</b> | <b>3745</b> | <b>73998</b> | <b>939594</b> | <b>C</b>                                             | <b>C</b> | <b>C</b> | <b>C</b> | <b>C</b> | <b>C</b> | <b>C</b> | <b>C</b> | <b>C</b>          |
| C*03:04:01G                                              | 03:04:01G              |           | 03:04:01G | 5590                                          | 37352        | 724225        | 7254        | 24941        | 2622        | 65827        | 867811        | C                                                    | C        | C        | C        | C        | C        | C        | C        | C                 |
| C*03:04:01                                               | 03:04:01               |           | 03:04:01G | 1841                                          | 7236         | 40821         | 239         | 12210        | 1122        | 8163         | 71632         | C                                                    | C        | C        | C        | C        | C        | C        | C        | C                 |
| C*03:04:01:01                                            | 03:04:01:01            | HLA00413  | 03:04:01G | 0                                             | 0            | 116           | 0           | 0            | 0           | 4            | 120           |                                                      |          | WD       |          |          |          |          | WD       | WD                |
| C*03:04:01:02                                            | 03:04:01:02            | HLA04253  | 03:04:01G | 0                                             | 0            | 16            | 0           | 0            | 0           | 1            | 17            |                                                      |          | WD       |          |          |          |          | WD       | WD                |
| C*03:100                                                 | 03:100                 | HLA05788  | 03:04:01G | 0                                             | 7            | 0             | 0           | 0            | 0           | 3            | 10            |                                                      | WD       |          |          |          |          |          | WD       | WD                |

| Supplemental Table 10: HLA-C Allele Summary <sup>a</sup> |                        |           |           | Allele Count by Population Group <sup>b</sup> |            |             |            |             |            |             |              | 3.0.0 CIWD Category by Population Group <sup>c</sup> |          |          |          |          |          |          |          |                   |
|----------------------------------------------------------|------------------------|-----------|-----------|-----------------------------------------------|------------|-------------|------------|-------------|------------|-------------|--------------|------------------------------------------------------|----------|----------|----------|----------|----------|----------|----------|-------------------|
| Allele                                                   | Genomic typing         | Allele ID | G group   | AFA                                           | API        | EURO        | MENA       | HIS         | NAM        | UNK         | Total        | AFA                                                  | API      | EURO     | MENA     | HIS      | NAM      | UNK      | Total    | Highest Frequency |
| C*03:101                                                 | 03:101                 | HLA05870  | 03:04:01G | 0                                             | 0          | 0           | 0          | 0           | 1          | 0           | 1            |                                                      |          |          |          |          |          |          |          |                   |
| C*03:252                                                 | 03:252                 | HLA11762  | 03:04:01G | 1                                             | 0          | 2           | 0          | 0           | 0          | 0           | 3            |                                                      |          |          |          |          |          |          |          |                   |
| <b>C*03:04:02G total</b>                                 | <b>03:04:02G total</b> |           |           | <b>10141</b>                                  | <b>136</b> | <b>2235</b> | <b>656</b> | <b>2037</b> | <b>374</b> | <b>2881</b> | <b>18460</b> | <b>C</b>                                             | <b>C</b> | <b>C</b> | <b>C</b> | <b>C</b> | <b>C</b> | <b>C</b> | <b>C</b> | <b>C</b>          |
| C*03:04:02G                                              | 03:04:02G              |           | 03:04:02G | 110                                           | 4          | 83          | 9          | 16          | 1          | 43          | 266          | C                                                    |          | WD       | WD       | I        |          | I        | I        | C                 |
| C*03:04:02                                               | 03:04:02               | HLA00414  | 03:04:02G | 10031                                         | 132        | 2152        | 647        | 2021        | 373        | 2838        | 18194        | C                                                    | C        | C        | C        | C        | C        | C        | C        | C                 |
| C*03:04:04                                               | 03:04:04               | HLA02356  |           | 1                                             | 855        | 15          | 0          | 2           | 0          | 55          | 928          |                                                      | C        | WD       |          |          |          | I        | I        | C                 |
| C*03:04:05                                               | 03:04:05               | HLA02522  |           | 0                                             | 1          | 37          | 0          | 0           | 0          | 3           | 41           |                                                      |          | WD       |          |          |          |          | WD       | WD                |
| C*03:04:06                                               | 03:04:06               | HLA02819  |           | 26                                            | 0          | 2           | 0          | 0           | 1          | 4           | 33           | WD                                                   |          |          |          |          |          |          | WD       | WD                |
| C*03:04:07                                               | 03:04:07               | HLA02820  |           | 0                                             | 0          | 4           | 0          | 0           | 0          | 0           | 4            |                                                      |          |          |          |          |          |          |          |                   |
| C*03:04:08                                               | 03:04:08               | HLA04260  |           | 0                                             | 0          | 25          | 0          | 0           | 0          | 1           | 26           |                                                      |          | WD       |          |          |          |          | WD       | WD                |
| C*03:04:09                                               | 03:04:09               | HLA04261  |           | 0                                             | 0          | 9           | 0          | 0           | 0          | 0           | 9            |                                                      |          | WD       |          |          |          |          | WD       | WD                |
| C*03:04:10                                               | 03:04:10               | HLA04263  |           | 0                                             | 8          | 0           | 0          | 0           | 0          | 0           | 8            |                                                      | WD       |          |          |          |          |          | WD       | WD                |
| C*03:04:11                                               | 03:04:11               | HLA04267  |           | 0                                             | 1          | 48          | 0          | 0           | 0          | 1           | 50           |                                                      |          | WD       |          |          |          |          | WD       | WD                |
| C*03:04:13                                               | 03:04:13               | HLA04278  |           | 0                                             | 0          | 47          | 0          | 0           | 0          | 2           | 49           |                                                      |          | WD       |          |          |          |          | WD       | WD                |
| C*03:04:14                                               | 03:04:14               | HLA04255  |           | 0                                             | 0          | 11          | 0          | 0           | 0          | 0           | 11           |                                                      |          | WD       |          |          |          |          | WD       | WD                |
| C*03:04:15                                               | 03:04:15               | HLA04589  |           | 0                                             | 0          | 14          | 0          | 0           | 0          | 0           | 14           |                                                      |          | WD       |          |          |          |          | WD       | WD                |
| C*03:04:16                                               | 03:04:16               | HLA04603  |           | 0                                             | 0          | 3           | 0          | 0           | 0          | 0           | 3            |                                                      |          |          |          |          |          |          |          |                   |
| C*03:04:17                                               | 03:04:17               | HLA04622  |           | 0                                             | 0          | 13          | 0          | 0           | 0          | 1           | 14           |                                                      |          | WD       |          |          |          |          | WD       | WD                |
| C*03:04:18                                               | 03:04:18               | HLA04629  |           | 8                                             | 0          | 2           | 0          | 0           | 0          | 2           | 12           | WD                                                   |          |          |          |          |          |          | WD       | WD                |
| C*03:04:19                                               | 03:04:19               | HLA04736  |           | 0                                             | 0          | 5           | 0          | 0           | 0          | 1           | 6            |                                                      |          | WD       |          |          |          |          | WD       | WD                |
| C*03:04:21                                               | 03:04:21               | HLA06400  |           | 0                                             | 6          | 0           | 0          | 0           | 0          | 0           | 6            |                                                      | WD       |          |          |          |          |          | WD       | WD                |
| C*03:04:22                                               | 03:04:22               | HLA06445  |           | 0                                             | 0          | 4           | 0          | 1           | 0          | 0           | 5            |                                                      |          |          |          |          |          |          | WD       | WD                |
| C*03:04:23                                               | 03:04:23               | HLA06728  |           | 0                                             | 0          | 1           | 0          | 0           | 0          | 0           | 1            |                                                      |          |          |          |          |          |          |          |                   |
| C*03:04:24                                               | 03:04:24               | HLA07246  |           | 0                                             | 0          | 2           | 0          | 0           | 0          | 0           | 2            |                                                      |          |          |          |          |          |          |          |                   |
| C*03:04:25                                               | 03:04:25               | HLA07348  |           | 0                                             | 0          | 2           | 0          | 0           | 0          | 0           | 2            |                                                      |          |          |          |          |          |          |          |                   |
| C*03:04:26                                               | 03:04:26               | HLA07763  |           | 0                                             | 0          | 1           | 0          | 0           | 0          | 0           | 1            |                                                      |          |          |          |          |          |          |          |                   |
| C*03:04:27                                               | 03:04:27               | HLA07952  |           | 0                                             | 0          | 19          | 0          | 9           | 0          | 13          | 41           |                                                      |          | WD       |          | I        |          | WD       | WD       | I                 |
| C*03:04:28                                               | 03:04:28               | HLA07956  |           | 0                                             | 1          | 1           | 0          | 0           | 0          | 0           | 2            |                                                      |          |          |          |          |          |          |          |                   |
| C*03:04:29                                               | 03:04:29               | HLA08166  |           | 0                                             | 0          | 1           | 0          | 0           | 0          | 0           | 1            |                                                      |          |          |          |          |          |          |          |                   |
| C*03:04:30                                               | 03:04:30               | HLA08167  |           | 0                                             | 0          | 1           | 0          | 0           | 0          | 0           | 1            |                                                      |          |          |          |          |          |          |          |                   |
| C*03:04:33                                               | 03:04:33               | HLA09039  |           | 2                                             | 0          | 0           | 0          | 0           | 0          | 0           | 2            |                                                      |          |          |          |          |          |          |          |                   |

| Supplemental Table 10: HLA-C Allele Summary <sup>a</sup> |                        |           | Allele Count by Population Group <sup>b</sup> |            |           |            |           |             |            |             |              | 3.0.0 CIWD Category by Population Group <sup>c</sup> |          |           |           |          |           |           |           |                   |
|----------------------------------------------------------|------------------------|-----------|-----------------------------------------------|------------|-----------|------------|-----------|-------------|------------|-------------|--------------|------------------------------------------------------|----------|-----------|-----------|----------|-----------|-----------|-----------|-------------------|
| Allele                                                   | Genomic typing         | Allele ID | G group                                       | AFA        | API       | EURO       | MENA      | HIS         | NAM        | UNK         | Total        | AFA                                                  | API      | EURO      | MENA      | HIS      | NAM       | UNK       | Total     | Highest Frequency |
| C*03:04:34                                               | 03:04:34               | HLA09040  |                                               | 0          | 0         | 1          | 0         | 0           | 0          | 0           | 1            |                                                      |          |           |           |          |           |           |           |                   |
| C*03:04:35                                               | 03:04:35               | HLA09042  |                                               | 0          | 0         | 0          | 0         | 0           | 0          | 1           | 1            |                                                      |          |           |           |          |           |           |           |                   |
| C*03:04:37                                               | 03:04:37               | HLA09972  |                                               | 0          | 3         | 0          | 0         | 0           | 0          | 0           | 3            |                                                      |          |           |           |          |           |           |           |                   |
| C*03:04:42                                               | 03:04:42               | HLA10094  |                                               | 0          | 0         | 5          | 0         | 0           | 0          | 0           | 5            |                                                      |          | WD        |           |          |           |           | WD        | WD                |
| C*03:04:45                                               | 03:04:45               | HLA11113  |                                               | 0          | 0         | 0          | 0         | 3           | 1          | 0           | 4            |                                                      |          |           |           |          |           |           |           |                   |
| C*03:04:46                                               | 03:04:46               | HLA11343  |                                               | 0          | 0         | 0          | 0         | 0           | 0          | 1           | 1            |                                                      |          |           |           |          |           |           |           |                   |
| C*03:04:47                                               | 03:04:47               | HLA13264  |                                               | 0          | 1         | 0          | 0         | 0           | 0          | 0           | 1            |                                                      |          |           |           |          |           |           |           |                   |
| <b>C*03:05 total</b>                                     | <b>03:05 total</b>     |           |                                               | <b>242</b> | <b>78</b> | <b>520</b> | <b>22</b> | <b>7091</b> | <b>845</b> | <b>1263</b> | <b>10061</b> | <b>C</b>                                             | <b>I</b> | <b>I</b>  | <b>WD</b> | <b>C</b> | <b>C</b>  | <b>C</b>  | <b>C</b>  | <b>C</b>          |
| <b>C*03:05:01G total</b>                                 | <b>03:05:01G total</b> |           |                                               | <b>242</b> | <b>78</b> | <b>520</b> | <b>22</b> | <b>7091</b> | <b>845</b> | <b>1263</b> | <b>10061</b> | <b>C</b>                                             | <b>I</b> | <b>I</b>  | <b>WD</b> | <b>C</b> | <b>C</b>  | <b>C</b>  | <b>C</b>  | <b>C</b>          |
| C*03:05                                                  | 03:05                  | HLA00415  | 03:05:01G                                     | 240        | 75        | 497        | 22        | 6934        | 840        | 1213        | 9821         | C                                                    | I        | I         | WD        | C        | C         | C         | C         | C                 |
| C*03:05:01G                                              | 03:05:01G              |           | 03:05:01G                                     | 2          | 3         | 23         | 0         | 157         | 5          | 50          | 240          |                                                      |          | WD        |           | C        | WD        | I         | I         | C                 |
| <b>C*03:06 total</b>                                     | <b>03:06 total</b>     |           |                                               | <b>45</b>  | <b>56</b> | <b>361</b> | <b>11</b> | <b>5096</b> | <b>198</b> | <b>739</b>  | <b>6506</b>  | <b>C</b>                                             | <b>I</b> | <b>I</b>  | <b>WD</b> | <b>C</b> | <b>C</b>  | <b>C</b>  | <b>C</b>  | <b>C</b>          |
| C*03:06                                                  | 03:06                  |           |                                               | 21         | 27        | 252        | 7         | 2505        | 121        | 432         | 3365         | WD                                                   | I        | I         | WD        | C        | C         | C         | C         | C                 |
| C*03:06P                                                 | 03:06P                 |           |                                               | 0          | 0         | 1          | 0         | 0           | 0          | 0           | 1            |                                                      |          |           |           |          |           |           |           |                   |
| C*03:06:01                                               | 03:06:01               | HLA00416  |                                               | 24         | 29        | 108        | 4         | 2590        | 77         | 307         | 3139         | WD                                                   | I        | WD        |           | C        | C         | C         | C         | C                 |
| C*03:06:02                                               | 03:06:02               | HLA12785  |                                               | 0          | 0         | 0          | 0         | 1           | 0          | 0           | 1            |                                                      |          |           |           |          |           |           |           |                   |
| <b>C*03:07 total</b>                                     | <b>03:07 total</b>     |           |                                               | <b>6</b>   | <b>2</b>  | <b>195</b> | <b>1</b>  | <b>158</b>  | <b>5</b>   | <b>61</b>   | <b>428</b>   | <b>WD</b>                                            |          | <b>I</b>  |           | <b>C</b> | <b>WD</b> | <b>I</b>  | <b>I</b>  | <b>C</b>          |
| C*03:07                                                  | 03:07                  |           |                                               | 6          | 1         | 189        | 1         | 156         | 5          | 60          | 418          | WD                                                   |          | I         |           | C        | WD        | I         | I         | C                 |
| C*03:07:01                                               | 03:07:01               | HLA00417  |                                               | 0          | 1         | 6          | 0         | 2           | 0          | 1           | 10           |                                                      |          | WD        |           |          |           |           | WD        | WD                |
| C*03:08                                                  | 03:08                  | HLA00418  |                                               | 2          | 0         | 75         | 5         | 129         | 9          | 40          | 260          |                                                      |          | WD        | WD        | C        | C         | I         | I         | C                 |
| C*03:09                                                  | 03:09                  | HLA00419  |                                               | 8          | 0         | 186        | 0         | 2           | 1          | 26          | 223          | WD                                                   |          | I         |           |          |           | I         | I         | I                 |
| C*03:10                                                  | 03:10                  | HLA01076  |                                               | 5          | 1         | 238        | 0         | 3           | 1          | 33          | 281          | WD                                                   |          | I         |           |          |           | I         | I         | I                 |
| <b>C*03:11 total</b>                                     | <b>03:11 total</b>     |           |                                               | <b>2</b>   | <b>1</b>  | <b>62</b>  | <b>0</b>  | <b>3</b>    | <b>0</b>   | <b>7</b>    | <b>75</b>    |                                                      |          | <b>WD</b> |           |          |           | <b>WD</b> | <b>WD</b> | <b>WD</b>         |
| C*03:11                                                  | 03:11                  |           |                                               | 0          | 1         | 9          | 0         | 1           | 0          | 1           | 12           |                                                      |          | WD        |           |          |           |           | WD        | WD                |
| C*03:11:02                                               | 03:11:02               | HLA02375  |                                               | 2          | 0         | 53         | 0         | 2           | 0          | 6           | 63           |                                                      |          | WD        |           |          |           | WD        | WD        | WD                |
| <b>C*03:13 total</b>                                     | <b>03:13 total</b>     |           |                                               | <b>2</b>   | <b>2</b>  | <b>20</b>  | <b>1</b>  | <b>0</b>    | <b>0</b>   | <b>2</b>    | <b>27</b>    |                                                      |          | <b>WD</b> |           |          |           |           | <b>WD</b> | <b>WD</b>         |
| C*03:13                                                  | 03:13                  |           |                                               | 1          | 0         | 2          | 0         | 0           | 0          | 0           | 3            |                                                      |          |           |           |          |           |           |           |                   |
| C*03:13:01                                               | 03:13:01               | HLA01412  |                                               | 1          | 1         | 18         | 1         | 0           | 0          | 2           | 23           |                                                      |          | WD        |           |          |           |           | WD        | WD                |
| C*03:13:02                                               | 03:13:02               | HLA09991  |                                               | 0          | 1         | 0          | 0         | 0           | 0          | 0           | 1            |                                                      |          |           |           |          |           |           |           |                   |
| <b>C*03:14 total</b>                                     | <b>03:14 total</b>     |           |                                               | <b>4</b>   | <b>1</b>  | <b>486</b> | <b>0</b>  | <b>14</b>   | <b>0</b>   | <b>52</b>   | <b>557</b>   |                                                      |          | <b>I</b>  |           | <b>I</b> |           | <b>I</b>  | <b>I</b>  | <b>I</b>          |
| <b>C*03:14:01G total</b>                                 | <b>03:14:01G total</b> |           |                                               | <b>4</b>   | <b>1</b>  | <b>486</b> | <b>0</b>  | <b>14</b>   | <b>0</b>   | <b>52</b>   | <b>557</b>   |                                                      |          | <b>I</b>  |           | <b>I</b> |           | <b>I</b>  | <b>I</b>  | <b>I</b>          |



| Supplemental Table 10: HLA-C Allele Summary <sup>a</sup> |                    |           | Allele Count by Population Group <sup>b</sup> |          |            |           |          |          |          |           |            | 3.0.0 CIWD Category by Population Group <sup>c</sup> |           |           |      |     |     |           |           |                   |
|----------------------------------------------------------|--------------------|-----------|-----------------------------------------------|----------|------------|-----------|----------|----------|----------|-----------|------------|------------------------------------------------------|-----------|-----------|------|-----|-----|-----------|-----------|-------------------|
| Allele                                                   | Genomic typing     | Allele ID | G group                                       | AFA      | API        | EURO      | MENA     | HIS      | NAM      | UNK       | Total      | AFA                                                  | API       | EURO      | MENA | HIS | NAM | UNK       | Total     | Highest Frequency |
| C*03:14                                                  | 03:14              | HLA01425  | 03:14:01G                                     | 4        | 1          | 486       | 0        | 14       | 0        | 52        | 557        |                                                      |           | I         |      | I   |     | I         | I         | I                 |
| C*03:15                                                  | 03:15              | HLA01581  |                                               | 0        | 3          | 0         | 0        | 0        | 0        | 0         | 3          |                                                      |           |           |      |     |     |           |           |                   |
| C*03:16                                                  | 03:16              | HLA01660  |                                               | 3        | 3          | 316       | 19       | 17       | 0        | 22        | 380        |                                                      |           | I         | WD   | I   |     | I         | I         | I                 |
| <b>C*03:17 total</b>                                     | <b>03:17 total</b> |           |                                               | <b>1</b> | <b>135</b> | <b>5</b>  | <b>0</b> | <b>2</b> | <b>0</b> | <b>14</b> | <b>157</b> |                                                      | <b>C</b>  | <b>WD</b> |      |     |     | <b>I</b>  | <b>WD</b> | <b>C</b>          |
| C*03:17                                                  | 03:17              |           |                                               | 1        | 131        | 5         | 0        | 2        | 0        | 14        | 153        |                                                      | C         | WD        |      |     |     | I         | WD        | C                 |
| C*03:17:01                                               | 03:17:01           | HLA01906  |                                               | 0        | 4          | 0         | 0        | 0        | 0        | 0         | 4          |                                                      |           |           |      |     |     |           |           |                   |
| <b>C*03:18 total</b>                                     | <b>03:18 total</b> |           |                                               | <b>0</b> | <b>0</b>   | <b>32</b> | <b>0</b> | <b>0</b> | <b>1</b> | <b>13</b> | <b>46</b>  |                                                      |           | <b>WD</b> |      |     |     | <b>WD</b> | <b>WD</b> | <b>WD</b>         |
| C*03:18                                                  | 03:18              |           |                                               | 0        | 0          | 13        | 0        | 0        | 1        | 2         | 16         |                                                      |           | WD        |      |     |     |           | WD        | WD                |
| C*03:18:01                                               | 03:18:01           | HLA01925  |                                               | 0        | 0          | 19        | 0        | 0        | 0        | 8         | 27         |                                                      |           | WD        |      |     |     | WD        | WD        | WD                |
| C*03:18:02                                               | 03:18:02           | HLA11117  |                                               | 0        | 0          | 0         | 0        | 0        | 0        | 3         | 3          |                                                      |           |           |      |     |     |           |           |                   |
| C*03:19                                                  | 03:19              | HLA02133  |                                               | 4        | 0          | 378       | 97       | 7        | 4        | 59        | 549        |                                                      |           | I         | C    | I   |     | I         | I         | C                 |
| C*03:21                                                  | 03:21              | HLA02391  |                                               | 0        | 13         | 0         | 0        | 0        | 0        | 0         | 13         |                                                      | I         |           |      |     |     |           | WD        | I                 |
| C*03:22Q                                                 | 03:22Q             | HLA02414  |                                               | 0        | 0          | 2         | 0        | 0        | 0        | 0         | 2          |                                                      |           |           |      |     |     |           |           |                   |
| C*03:23                                                  | 03:23              | HLA02444  |                                               | 0        | 3          | 0         | 0        | 0        | 0        | 1         | 4          |                                                      |           |           |      |     |     |           |           |                   |
| C*03:24                                                  | 03:24              | HLA02467  |                                               | 0        | 3          | 0         | 0        | 0        | 0        | 0         | 3          |                                                      |           |           |      |     |     |           |           |                   |
| C*03:26                                                  | 03:26              | HLA02526  |                                               | 0        | 1          | 26        | 0        | 0        | 0        | 2         | 29         |                                                      |           | WD        |      |     |     |           | WD        | WD                |
| C*03:27                                                  | 03:27              | HLA02594  |                                               | 0        | 0          | 0         | 0        | 1        | 0        | 1         | 2          |                                                      |           |           |      |     |     |           |           |                   |
| C*03:28                                                  | 03:28              | HLA02599  |                                               | 0        | 1          | 18        | 0        | 0        | 0        | 1         | 20         |                                                      |           | WD        |      |     |     |           | WD        | WD                |
| C*03:30                                                  | 03:30              | HLA02617  |                                               | 0        | 0          | 8         | 0        | 0        | 0        | 0         | 8          |                                                      |           | WD        |      |     |     |           | WD        | WD                |
| C*03:31                                                  | 03:31              | HLA02648  |                                               | 0        | 0          | 2         | 0        | 0        | 0        | 0         | 2          |                                                      |           |           |      |     |     |           |           |                   |
| C*03:32                                                  | 03:32              | HLA02681  |                                               | 0        | 6          | 19        | 0        | 1        | 0        | 0         | 26         |                                                      | WD        | WD        |      |     |     |           | WD        | WD                |
| C*03:33                                                  | 03:33              | HLA02715  |                                               | 0        | 0          | 0         | 0        | 0        | 0        | 1         | 1          |                                                      |           |           |      |     |     |           |           |                   |
| C*03:34                                                  | 03:34              | HLA02729  |                                               | 0        | 1          | 2         | 0        | 0        | 0        | 1         | 4          |                                                      |           |           |      |     |     |           |           |                   |
| <b>C*03:35 total</b>                                     | <b>03:35 total</b> |           |                                               | <b>0</b> | <b>0</b>   | <b>41</b> | <b>3</b> | <b>2</b> | <b>0</b> | <b>4</b>  | <b>50</b>  |                                                      |           | <b>WD</b> |      |     |     |           | <b>WD</b> | <b>WD</b>         |
| C*03:35                                                  | 03:35              |           |                                               | 0        | 0          | 34        | 3        | 1        | 0        | 3         | 41         |                                                      |           | WD        |      |     |     |           | WD        | WD                |
| C*03:35:01                                               | 03:35:01           | HLA02758  |                                               | 0        | 0          | 4         | 0        | 1        | 0        | 1         | 6          |                                                      |           |           |      |     |     |           | WD        | WD                |
| C*03:35:02                                               | 03:35:02           | HLA15901  |                                               | 0        | 0          | 3         | 0        | 0        | 0        | 0         | 3          |                                                      |           |           |      |     |     |           |           |                   |
| C*03:36                                                  | 03:36              | HLA02817  |                                               | 0        | 62         | 0         | 0        | 0        | 0        | 16        | 78         |                                                      | I         |           |      |     |     | I         | WD        | I                 |
| <b>C*03:37 total</b>                                     | <b>03:37 total</b> |           |                                               | <b>0</b> | <b>7</b>   | <b>4</b>  | <b>0</b> | <b>0</b> | <b>0</b> | <b>0</b>  | <b>11</b>  |                                                      | <b>WD</b> |           |      |     |     |           | <b>WD</b> | <b>WD</b>         |
| C*03:37                                                  | 03:37              |           |                                               | 0        | 1          | 3         | 0        | 0        | 0        | 0         | 4          |                                                      |           |           |      |     |     |           |           |                   |
| C*03:37:01                                               | 03:37:01           | HLA02818  |                                               | 0        | 6          | 0         | 0        | 0        | 0        | 0         | 6          |                                                      | WD        |           |      |     |     |           | WD        | WD                |

| Supplemental Table 10: HLA-C Allele Summary <sup>a</sup> |                        |           | Allele Count by Population Group <sup>b</sup> |           |           |           |          |           |          |           |            | 3.0.0 CIWD Category by Population Group <sup>c</sup> |           |           |      |          |          |          |           |                   |
|----------------------------------------------------------|------------------------|-----------|-----------------------------------------------|-----------|-----------|-----------|----------|-----------|----------|-----------|------------|------------------------------------------------------|-----------|-----------|------|----------|----------|----------|-----------|-------------------|
| Allele                                                   | Genomic typing         | Allele ID | G group                                       | AFA       | API       | EURO      | MENA     | HIS       | NAM      | UNK       | Total      | AFA                                                  | API       | EURO      | MENA | HIS      | NAM      | UNK      | Total     | Highest Frequency |
| C*03:37:02                                               | 03:37:02               | HLA08536  |                                               | 0         | 0         | 1         | 0        | 0         | 0        | 0         | 1          |                                                      |           |           |      |          |          |          |           |                   |
| <b>C*03:38 total</b>                                     | <b>03:38 total</b>     |           |                                               | <b>47</b> | <b>3</b>  | <b>9</b>  | <b>0</b> | <b>20</b> | <b>7</b> | <b>17</b> | <b>103</b> | <b>C</b>                                             |           | <b>WD</b> |      | <b>I</b> | <b>C</b> | <b>I</b> | <b>WD</b> | <b>C</b>          |
| C*03:38                                                  | 03:38                  |           |                                               | 4         | 0         | 1         | 0        | 4         | 0        | 2         | 11         |                                                      |           |           |      |          |          |          | WD        | WD                |
| C*03:38:01                                               | 03:38:01               | HLA02821  |                                               | 43        | 0         | 4         | 0        | 16        | 6        | 14        | 83         | C                                                    |           |           |      | I        | WD       | I        | WD        | C                 |
| C*03:38:02                                               | 03:38:02               | HLA03048  |                                               | 0         | 3         | 4         | 0        | 0         | 1        | 1         | 9          |                                                      |           |           |      |          |          |          | WD        | WD                |
| C*03:39                                                  | 03:39                  | HLA02843  |                                               | 0         | 2         | 0         | 0        | 0         | 0        | 0         | 2          |                                                      |           |           |      |          |          |          |           |                   |
| <b>C*03:40 total</b>                                     | <b>03:40 total</b>     |           |                                               | <b>2</b>  | <b>1</b>  | <b>79</b> | <b>0</b> | <b>7</b>  | <b>0</b> | <b>14</b> | <b>103</b> |                                                      |           | <b>WD</b> |      | <b>I</b> |          | <b>I</b> | <b>WD</b> | <b>I</b>          |
| C*03:40                                                  | 03:40                  |           |                                               | 1         | 0         | 16        | 0        | 0         | 0        | 0         | 17         |                                                      |           | WD        |      |          |          |          | WD        | WD                |
| <b>C*03:40:01G total</b>                                 | <b>03:40:01G total</b> |           |                                               | <b>0</b>  | <b>1</b>  | <b>62</b> | <b>0</b> | <b>7</b>  | <b>0</b> | <b>14</b> | <b>84</b>  |                                                      |           | <b>WD</b> |      | <b>I</b> |          | <b>I</b> | <b>WD</b> | <b>I</b>          |
| C*03:40:01G                                              | 03:40:01G              |           | 03:40:01G                                     | 0         | 0         | 26        | 0        | 5         | 0        | 7         | 38         |                                                      |           | WD        |      | WD       |          | WD       | WD        | WD                |
| C*03:40:01                                               | 03:40:01               | HLA02881  | 03:40:01G                                     | 0         | 1         | 26        | 0        | 0         | 0        | 4         | 31         |                                                      |           | WD        |      |          |          |          | WD        | WD                |
| C*03:279                                                 | 03:279                 | HLA13188  | 03:40:01G                                     | 0         | 0         | 10        | 0        | 2         | 0        | 3         | 15         |                                                      |           | WD        |      |          |          |          | WD        | WD                |
| C*03:40:02                                               | 03:40:02               | HLA07015  |                                               | 0         | 0         | 1         | 0        | 0         | 0        | 0         | 1          |                                                      |           |           |      |          |          |          |           |                   |
| C*03:40:04                                               | 03:40:04               | HLA12860  |                                               | 1         | 0         | 0         | 0        | 0         | 0        | 0         | 1          |                                                      |           |           |      |          |          |          |           |                   |
| <b>C*03:41 total</b>                                     | <b>03:41 total</b>     |           |                                               | <b>0</b>  | <b>6</b>  | <b>11</b> | <b>0</b> | <b>2</b>  | <b>0</b> | <b>0</b>  | <b>19</b>  |                                                      | <b>WD</b> | <b>WD</b> |      |          |          |          | <b>WD</b> | <b>WD</b>         |
| C*03:41                                                  | 03:41                  |           |                                               | 0         | 2         | 6         | 0        | 1         | 0        | 0         | 9          |                                                      |           | WD        |      |          |          |          | WD        | WD                |
| C*03:41:01                                               | 03:41:01               | HLA02927  |                                               | 0         | 4         | 3         | 0        | 0         | 0        | 0         | 7          |                                                      |           |           |      |          |          |          | WD        | WD                |
| C*03:41:02                                               | 03:41:02               | HLA11976  |                                               | 0         | 0         | 2         | 0        | 1         | 0        | 0         | 3          |                                                      |           |           |      |          |          |          |           |                   |
| C*03:42                                                  | 03:42                  | HLA02993  |                                               | 0         | 0         | 52        | 0        | 0         | 0        | 1         | 53         |                                                      |           | WD        |      |          |          |          | WD        | WD                |
| <b>C*03:43 total</b>                                     | <b>03:43 total</b>     |           |                                               | <b>0</b>  | <b>10</b> | <b>26</b> | <b>1</b> | <b>0</b>  | <b>0</b> | <b>3</b>  | <b>40</b>  |                                                      | <b>WD</b> | <b>WD</b> |      |          |          |          | <b>WD</b> | <b>WD</b>         |
| C*03:43                                                  | 03:43                  |           |                                               | 0         | 0         | 2         | 0        | 0         | 0        | 0         | 2          |                                                      |           |           |      |          |          |          |           |                   |
| C*03:43:01                                               | 03:43:01               | HLA02994  |                                               | 0         | 10        | 23        | 1        | 0         | 0        | 2         | 36         |                                                      | WD        | WD        |      |          |          |          | WD        | WD                |
| C*03:43:02                                               | 03:43:02               | HLA03544  |                                               | 0         | 0         | 1         | 0        | 0         | 0        | 1         | 2          |                                                      |           |           |      |          |          |          |           |                   |
| C*03:44                                                  | 03:44                  | HLA02998  |                                               | 0         | 0         | 395       | 1        | 0         | 0        | 11        | 407        |                                                      |           | I         |      |          |          | WD       | I         | I                 |
| C*03:45                                                  | 03:45                  | HLA03027  |                                               | 0         | 0         | 16        | 0        | 9         | 0        | 28        | 53         |                                                      |           | WD        |      | I        |          | I        | WD        | I                 |
| C*03:46                                                  | 03:46                  | HLA02987  |                                               | 0         | 4         | 9         | 0        | 0         | 0        | 1         | 14         |                                                      |           | WD        |      |          |          |          | WD        | WD                |
| C*03:47                                                  | 03:47                  | HLA03163  |                                               | 1         | 0         | 8         | 0        | 53        | 1        | 22        | 85         |                                                      |           | WD        |      | I        |          | I        | WD        | I                 |
| C*03:48                                                  | 03:48                  | HLA03242  |                                               | 0         | 1         | 0         | 0        | 0         | 0        | 0         | 1          |                                                      |           |           |      |          |          |          |           |                   |
| C*03:49                                                  | 03:49                  | HLA03362  |                                               | 0         | 9         | 4         | 1        | 0         | 0        | 3         | 17         |                                                      | WD        |           |      |          |          |          | WD        | WD                |
| C*03:51                                                  | 03:51                  | HLA03723  |                                               | 0         | 0         | 56        | 0        | 0         | 0        | 1         | 57         |                                                      |           | WD        |      |          |          |          | WD        | WD                |
| C*03:52                                                  | 03:52                  | HLA03724  |                                               | 0         | 0         | 1         | 0        | 0         | 0        | 0         | 1          |                                                      |           |           |      |          |          |          |           |                   |

| Supplemental Table 10: HLA-C Allele Summary <sup>a</sup> |                    |           | Allele Count by Population Group <sup>b</sup> |          |          |           |          |          |          |          |           |     | 3.0.0 CIWD Category by Population Group <sup>c</sup> |           |      |     |     |     |           |                   |
|----------------------------------------------------------|--------------------|-----------|-----------------------------------------------|----------|----------|-----------|----------|----------|----------|----------|-----------|-----|------------------------------------------------------|-----------|------|-----|-----|-----|-----------|-------------------|
| Allele                                                   | Genomic typing     | Allele ID | G group                                       | AFA      | API      | EURO      | MENA     | HIS      | NAM      | UNK      | Total     | AFA | API                                                  | EURO      | MENA | HIS | NAM | UNK | Total     | Highest Frequency |
| C*03:53                                                  | 03:53              | HLA03725  |                                               | 0        | 0        | 31        | 0        | 0        | 0        | 0        | 31        |     |                                                      | WD        |      |     |     |     | WD        | WD                |
| C*03:54                                                  | 03:54              | HLA03729  |                                               | 0        | 0        | 16        | 0        | 0        | 0        | 0        | 16        |     |                                                      | WD        |      |     |     |     | WD        | WD                |
| C*03:55                                                  | 03:55              | HLA03733  |                                               | 0        | 0        | 2         | 0        | 0        | 0        | 0        | 2         |     |                                                      |           |      |     |     |     |           |                   |
| C*03:56                                                  | 03:56              | HLA03737  |                                               | 0        | 8        | 0         | 0        | 0        | 0        | 0        | 8         |     | WD                                                   |           |      |     |     |     | WD        | WD                |
| <b>C*03:57 total</b>                                     | <b>03:57 total</b> |           |                                               | <b>0</b> | <b>0</b> | <b>1</b>  | <b>0</b> | <b>0</b> | <b>0</b> | <b>0</b> | <b>1</b>  |     |                                                      |           |      |     |     |     |           |                   |
| C*03:57                                                  | 03:57              |           |                                               | 0        | 0        | 1         | 0        | 0        | 0        | 0        | 1         |     |                                                      |           |      |     |     |     |           |                   |
| C*03:58                                                  | 03:58              | HLA03713  |                                               | 0        | 4        | 0         | 0        | 0        | 0        | 0        | 4         |     |                                                      |           |      |     |     |     |           |                   |
| C*03:59                                                  | 03:59              | HLA03827  |                                               | 0        | 0        | 5         | 0        | 0        | 0        | 0        | 5         |     |                                                      | WD        |      |     |     |     | WD        | WD                |
| C*03:60                                                  | 03:60              | HLA03828  |                                               | 0        | 4        | 0         | 0        | 0        | 0        | 1        | 5         |     |                                                      |           |      |     |     |     | WD        | WD                |
| C*03:63                                                  | 03:63              | HLA04256  |                                               | 0        | 0        | 1         | 0        | 0        | 0        | 0        | 1         |     |                                                      |           |      |     |     |     |           |                   |
| <b>C*03:64 total</b>                                     | <b>03:64 total</b> |           |                                               | <b>0</b> | <b>0</b> | <b>10</b> | <b>1</b> | <b>1</b> | <b>0</b> | <b>1</b> | <b>13</b> |     |                                                      | <b>WD</b> |      |     |     |     | <b>WD</b> | <b>WD</b>         |
| C*03:64:01                                               | 03:64:01           | HLA04257  |                                               | 0        | 0        | 9         | 1        | 0        | 0        | 1        | 11        |     |                                                      | WD        |      |     |     |     | WD        | WD                |
| C*03:64:02                                               | 03:64:02           | HLA08206  |                                               | 0        | 0        | 1         | 0        | 1        | 0        | 0        | 2         |     |                                                      |           |      |     |     |     |           |                   |
| C*03:65                                                  | 03:65              | HLA04259  |                                               | 0        | 0        | 2         | 0        | 0        | 0        | 0        | 2         |     |                                                      |           |      |     |     |     |           |                   |
| C*03:66                                                  | 03:66              | HLA04262  |                                               | 0        | 0        | 1         | 0        | 0        | 0        | 0        | 1         |     |                                                      |           |      |     |     |     |           |                   |
| C*03:69                                                  | 03:69              | HLA04269  |                                               | 0        | 0        | 11        | 0        | 0        | 0        | 0        | 11        |     |                                                      | WD        |      |     |     |     | WD        | WD                |
| C*03:70                                                  | 03:70              | HLA04271  |                                               | 0        | 0        | 31        | 0        | 0        | 0        | 0        | 31        |     |                                                      | WD        |      |     |     |     | WD        | WD                |
| C*03:71                                                  | 03:71              | HLA04273  |                                               | 0        | 0        | 1         | 2        | 0        | 0        | 0        | 3         |     |                                                      |           |      |     |     |     |           |                   |
| C*03:73                                                  | 03:73              | HLA04279  |                                               | 0        | 0        | 2         | 0        | 0        | 0        | 0        | 2         |     |                                                      |           |      |     |     |     |           |                   |
| C*03:74                                                  | 03:74              | HLA04280  |                                               | 0        | 0        | 1         | 0        | 0        | 0        | 0        | 1         |     |                                                      |           |      |     |     |     |           |                   |
| C*03:75                                                  | 03:75              | HLA04282  |                                               | 3        | 0        | 18        | 0        | 3        | 0        | 1        | 25        |     |                                                      | WD        |      |     |     |     | WD        | WD                |
| C*03:76                                                  | 03:76              | HLA04283  |                                               | 0        | 1        | 0         | 0        | 0        | 0        | 0        | 1         |     |                                                      |           |      |     |     |     |           |                   |
| C*03:77                                                  | 03:77              | HLA04595  |                                               | 0        | 1        | 0         | 0        | 2        | 0        | 0        | 3         |     |                                                      |           |      |     |     |     |           |                   |
| C*03:78                                                  | 03:78              | HLA04618  |                                               | 1        | 1        | 0         | 0        | 8        | 1        | 2        | 13        |     |                                                      |           |      | I   |     |     | WD        | I                 |
| C*03:79                                                  | 03:79              | HLA04633  |                                               | 0        | 0        | 1         | 0        | 0        | 0        | 0        | 1         |     |                                                      |           |      |     |     |     |           |                   |
| <b>C*03:80 total</b>                                     | <b>03:80 total</b> |           |                                               | <b>0</b> | <b>0</b> | <b>1</b>  | <b>0</b> | <b>0</b> | <b>0</b> | <b>0</b> | <b>1</b>  |     |                                                      |           |      |     |     |     |           |                   |
| C*03:80:02                                               | 03:80:02           | HLA15897  |                                               | 0        | 0        | 1         | 0        | 0        | 0        | 0        | 1         |     |                                                      |           |      |     |     |     |           |                   |
| C*03:81                                                  | 03:81              | HLA04758  |                                               | 0        | 0        | 4         | 0        | 2        | 0        | 0        | 6         |     |                                                      |           |      |     |     |     | WD        | WD                |
| C*03:82                                                  | 03:82              | HLA04777  |                                               | 0        | 0        | 4         | 0        | 0        | 0        | 0        | 4         |     |                                                      |           |      |     |     |     |           |                   |
| C*03:83                                                  | 03:83              | HLA04794  |                                               | 0        | 0        | 1         | 0        | 0        | 0        | 0        | 1         |     |                                                      |           |      |     |     |     |           |                   |
| C*03:85                                                  | 03:85              | HLA05111  |                                               | 0        | 22       | 1         | 0        | 0        | 0        | 0        | 23        |     | I                                                    |           |      |     |     |     | WD        | I                 |

| Supplemental Table 10: HLA-C Allele Summary <sup>a</sup> |                     |           | Allele Count by Population Group <sup>b</sup> |          |          |           |          |          |          |          |           | 3.0.0 CIWD Category by Population Group <sup>c</sup> |     |           |      |          |     |     |           |                   |
|----------------------------------------------------------|---------------------|-----------|-----------------------------------------------|----------|----------|-----------|----------|----------|----------|----------|-----------|------------------------------------------------------|-----|-----------|------|----------|-----|-----|-----------|-------------------|
| Allele                                                   | Genomic typing      | Allele ID | G group                                       | AFA      | API      | EURO      | MENA     | HIS      | NAM      | UNK      | Total     | AFA                                                  | API | EURO      | MENA | HIS      | NAM | UNK | Total     | Highest Frequency |
| C*03:86                                                  | 03:86               | HLA05122  |                                               | 0        | 3        | 1         | 0        | 0        | 0        | 2        | 6         |                                                      |     |           |      |          |     |     | WD        | WD                |
| <b>C*03:87 total</b>                                     | <b>03:87 total</b>  |           |                                               | <b>0</b> | <b>0</b> | <b>23</b> | <b>0</b> | <b>7</b> | <b>0</b> | <b>2</b> | <b>32</b> |                                                      |     | <b>WD</b> |      | <b>I</b> |     |     | <b>WD</b> | <b>I</b>          |
| C*03:87                                                  | 03:87               |           |                                               | 0        | 0        | 10        | 0        | 0        | 0        | 0        | 10        |                                                      |     | WD        |      |          |     |     | WD        | WD                |
| C*03:87:01                                               | 03:87:01            | HLA05124  |                                               | 0        | 0        | 12        | 0        | 0        | 0        | 2        | 14        |                                                      |     | WD        |      |          |     |     | WD        | WD                |
| C*03:87:02                                               | 03:87:02            | HLA12784  |                                               | 0        | 0        | 1         | 0        | 7        | 0        | 0        | 8         |                                                      |     |           |      | I        |     |     | WD        | I                 |
| C*03:88                                                  | 03:88               | HLA05162  |                                               | 1        | 157      | 0         | 9        | 0        | 2        | 2        | 171       |                                                      | C   |           | WD   |          |     |     | I         | C                 |
| C*03:90                                                  | 03:90               | HLA05171  |                                               | 0        | 2        | 0         | 0        | 0        | 0        | 0        | 2         |                                                      |     |           |      |          |     |     |           |                   |
| <b>C*03:91 total</b>                                     | <b>03:91 total</b>  |           |                                               | <b>0</b> | <b>0</b> | <b>11</b> | <b>0</b> | <b>0</b> | <b>0</b> | <b>0</b> | <b>11</b> |                                                      |     | <b>WD</b> |      |          |     |     | <b>WD</b> | <b>WD</b>         |
| C*03:91                                                  | 03:91               |           |                                               | 0        | 0        | 2         | 0        | 0        | 0        | 0        | 2         |                                                      |     |           |      |          |     |     |           |                   |
| C*03:91:01                                               | 03:91:01            | HLA05197  |                                               | 0        | 0        | 8         | 0        | 0        | 0        | 0        | 8         |                                                      |     | WD        |      |          |     |     | WD        | WD                |
| C*03:91:02                                               | 03:91:02            | HLA11116  |                                               | 0        | 0        | 1         | 0        | 0        | 0        | 0        | 1         |                                                      |     |           |      |          |     |     |           |                   |
| C*03:92                                                  | 03:92               | HLA05202  |                                               | 0        | 0        | 1         | 0        | 0        | 0        | 0        | 1         |                                                      |     |           |      |          |     |     |           |                   |
| C*03:93                                                  | 03:93               | HLA05371  |                                               | 0        | 0        | 1         | 0        | 0        | 0        | 1        | 2         |                                                      |     |           |      |          |     |     |           |                   |
| C*03:94                                                  | 03:94               | HLA05396  |                                               | 0        | 21       | 0         | 1        | 0        | 0        | 0        | 22        |                                                      | I   |           |      |          |     |     | WD        | I                 |
| C*03:95                                                  | 03:95               | HLA05605  |                                               | 0        | 0        | 4         | 0        | 0        | 0        | 0        | 4         |                                                      |     |           |      |          |     |     |           |                   |
| C*03:98                                                  | 03:98               | HLA05747  |                                               | 0        | 1        | 0         | 0        | 0        | 0        | 0        | 1         |                                                      |     |           |      |          |     |     |           |                   |
| C*03:103                                                 | 03:103              | HLA06067  |                                               | 0        | 0        | 2         | 0        | 3        | 0        | 0        | 5         |                                                      |     |           |      |          |     |     | WD        | WD                |
| C*03:104                                                 | 03:104              | HLA06074  |                                               | 0        | 0        | 2         | 0        | 0        | 0        | 0        | 2         |                                                      |     |           |      |          |     |     |           |                   |
| C*03:108                                                 | 03:108              | HLA06310  |                                               | 0        | 0        | 0         | 0        | 1        | 0        | 0        | 1         |                                                      |     |           |      |          |     |     |           |                   |
| C*03:109                                                 | 03:109              | HLA06398  |                                               | 0        | 0        | 22        | 0        | 1        | 0        | 0        | 23        |                                                      |     | WD        |      |          |     |     | WD        | WD                |
| C*03:112                                                 | 03:112              | HLA06419  |                                               | 0        | 0        | 1         | 0        | 0        | 0        | 0        | 1         |                                                      |     |           |      |          |     |     |           |                   |
| <b>C*03:113 total</b>                                    | <b>03:113 total</b> |           |                                               | <b>0</b> | <b>0</b> | <b>6</b>  | <b>0</b> | <b>0</b> | <b>0</b> | <b>0</b> | <b>6</b>  |                                                      |     | <b>WD</b> |      |          |     |     | <b>WD</b> | <b>WD</b>         |
| C*03:113                                                 | 03:113              |           |                                               | 0        | 0        | 3         | 0        | 0        | 0        | 0        | 3         |                                                      |     |           |      |          |     |     |           |                   |
| C*03:113:01                                              | 03:113:01           | HLA06711  |                                               | 0        | 0        | 3         | 0        | 0        | 0        | 0        | 3         |                                                      |     |           |      |          |     |     |           |                   |
| C*03:114                                                 | 03:114              | HLA06712  |                                               | 0        | 0        | 0         | 0        | 3        | 0        | 0        | 3         |                                                      |     |           |      |          |     |     |           |                   |
| C*03:115                                                 | 03:115              | HLA06713  |                                               | 0        | 0        | 23        | 0        | 0        | 0        | 0        | 23        |                                                      |     | WD        |      |          |     |     | WD        | WD                |
| <b>C*03:116 total</b>                                    | <b>03:116 total</b> |           |                                               | <b>0</b> | <b>4</b> | <b>1</b>  | <b>0</b> | <b>0</b> | <b>0</b> | <b>0</b> | <b>5</b>  |                                                      |     |           |      |          |     |     | <b>WD</b> | <b>WD</b>         |
| C*03:116:01                                              | 03:116:01           | HLA06726  |                                               | 0        | 4        | 1         | 0        | 0        | 0        | 0        | 5         |                                                      |     |           |      |          |     |     | WD        | WD                |
| C*03:117                                                 | 03:117              | HLA06727  |                                               | 0        | 0        | 10        | 0        | 2        | 0        | 1        | 13        |                                                      |     | WD        |      |          |     |     | WD        | WD                |
| C*03:120                                                 | 03:120              | HLA07007  |                                               | 0        | 0        | 20        | 0        | 0        | 0        | 0        | 20        |                                                      |     | WD        |      |          |     |     | WD        | WD                |
| C*03:121N                                                | 03:121N             | HLA07008  |                                               | 4        | 0        | 0         | 0        | 0        | 0        | 0        | 4         |                                                      |     |           |      |          |     |     |           |                   |

| Supplemental Table 10: HLA-C Allele Summary <sup>a</sup> |                |           | Allele Count by Population Group <sup>b</sup> |     |     |      |      |     |     |     |       |     | 3.0.0 CIWD Category by Population Group <sup>c</sup> |      |      |     |     |     |       |                   |
|----------------------------------------------------------|----------------|-----------|-----------------------------------------------|-----|-----|------|------|-----|-----|-----|-------|-----|------------------------------------------------------|------|------|-----|-----|-----|-------|-------------------|
| Allele                                                   | Genomic typing | Allele ID | G group                                       | AFA | API | EURO | MENA | HIS | NAM | UNK | Total | AFA | API                                                  | EURO | MENA | HIS | NAM | UNK | Total | Highest Frequency |
| C*03:122                                                 | 03:122         | HLA07013  |                                               | 0   | 0   | 14   | 0    | 0   | 0   | 0   | 14    |     |                                                      | WD   |      |     |     |     | WD    | WD                |
| C*03:123                                                 | 03:123         | HLA07014  |                                               | 0   | 0   | 0    | 0    | 1   | 1   | 0   | 2     |     |                                                      |      |      |     |     |     |       |                   |
| C*03:126                                                 | 03:126         | HLA07027  |                                               | 1   | 0   | 20   | 0    | 0   | 0   | 0   | 21    |     |                                                      | WD   |      |     |     |     | WD    | WD                |
| C*03:127                                                 | 03:127         | HLA07029  |                                               | 0   | 0   | 7    | 0    | 0   | 0   | 0   | 7     |     |                                                      | WD   |      |     |     |     | WD    | WD                |
| C*03:129                                                 | 03:129         | HLA07118  |                                               | 0   | 0   | 1    | 0    | 2   | 0   | 0   | 3     |     |                                                      |      |      |     |     |     |       |                   |
| C*03:130                                                 | 03:130         | HLA07119  |                                               | 0   | 0   | 4    | 0    | 0   | 0   | 0   | 4     |     |                                                      |      |      |     |     |     |       |                   |
| C*03:132                                                 | 03:132         | HLA07140  |                                               | 0   | 1   | 0    | 1    | 0   | 0   | 1   | 3     |     |                                                      |      |      |     |     |     |       |                   |
| C*03:135                                                 | 03:135         | HLA07239  |                                               | 0   | 0   | 1    | 0    | 0   | 0   | 0   | 1     |     |                                                      |      |      |     |     |     |       |                   |
| C*03:136                                                 | 03:136         | HLA07240  |                                               | 0   | 0   | 10   | 0    | 0   | 0   | 0   | 10    |     |                                                      | WD   |      |     |     |     | WD    | WD                |
| C*03:137                                                 | 03:137         | HLA07241  |                                               | 0   | 0   | 3    | 0    | 0   | 0   | 0   | 3     |     |                                                      |      |      |     |     |     |       |                   |
| C*03:139                                                 | 03:139         | HLA07355  |                                               | 0   | 4   | 4    | 1    | 0   | 0   | 0   | 9     |     |                                                      |      |      |     |     |     | WD    | WD                |
| C*03:140                                                 | 03:140         | HLA07495  |                                               | 1   | 6   | 3    | 0    | 2   | 0   | 5   | 17    |     | WD                                                   |      |      |     |     | WD  | WD    | WD                |
| C*03:141                                                 | 03:141         | HLA07496  |                                               | 0   | 0   | 2    | 0    | 0   | 0   | 0   | 2     |     |                                                      |      |      |     |     |     |       |                   |
| C*03:143                                                 | 03:143         | HLA07498  |                                               | 0   | 0   | 5    | 0    | 8   | 0   | 16  | 29    |     |                                                      | WD   |      | I   |     | I   | WD    | I                 |
| C*03:145                                                 | 03:145         | HLA07537  |                                               | 0   | 0   | 2    | 0    | 0   | 0   | 0   | 2     |     |                                                      |      |      |     |     |     |       |                   |
| C*03:147                                                 | 03:147         | HLA07940  |                                               | 0   | 1   | 6    | 0    | 0   | 0   | 1   | 8     |     |                                                      | WD   |      |     |     |     | WD    | WD                |
| C*03:148                                                 | 03:148         | HLA07945  |                                               | 0   | 0   | 10   | 0    | 0   | 0   | 0   | 10    |     |                                                      | WD   |      |     |     |     | WD    | WD                |
| C*03:149                                                 | 03:149         | HLA07946  |                                               | 0   | 0   | 2    | 0    | 0   | 0   | 0   | 2     |     |                                                      |      |      |     |     |     |       |                   |
| C*03:150                                                 | 03:150         | HLA07947  |                                               | 0   | 0   | 2    | 0    | 0   | 0   | 0   | 2     |     |                                                      |      |      |     |     |     |       |                   |
| C*03:151                                                 | 03:151         | HLA07948  |                                               | 0   | 0   | 15   | 1    | 0   | 0   | 0   | 16    |     |                                                      | WD   |      |     |     |     | WD    | WD                |
| C*03:152                                                 | 03:152         | HLA07949  |                                               | 0   | 0   | 1    | 0    | 0   | 0   | 0   | 1     |     |                                                      |      |      |     |     |     |       |                   |
| C*03:153                                                 | 03:153         | HLA07951  |                                               | 0   | 14  | 0    | 0    | 0   | 1   | 0   | 15    |     | I                                                    |      |      |     |     |     | WD    | I                 |
| C*03:154                                                 | 03:154         | HLA07953  |                                               | 0   | 0   | 5    | 0    | 0   | 0   | 0   | 5     |     |                                                      | WD   |      |     |     |     | WD    | WD                |
| C*03:155                                                 | 03:155         | HLA07955  |                                               | 0   | 0   | 0    | 2    | 0   | 0   | 0   | 2     |     |                                                      |      |      |     |     |     |       |                   |
| C*03:156                                                 | 03:156         | HLA07957  |                                               | 0   | 0   | 1    | 0    | 0   | 0   | 0   | 1     |     |                                                      |      |      |     |     |     |       |                   |
| C*03:158                                                 | 03:158         | HLA08175  |                                               | 0   | 3   | 0    | 0    | 0   | 0   | 0   | 3     |     |                                                      |      |      |     |     |     |       |                   |
| C*03:159                                                 | 03:159         | HLA08176  |                                               | 0   | 0   | 3    | 0    | 0   | 0   | 3   | 6     |     |                                                      |      |      |     |     |     | WD    | WD                |
| C*03:160                                                 | 03:160         | HLA08214  |                                               | 0   | 0   | 3    | 0    | 0   | 0   | 0   | 3     |     |                                                      |      |      |     |     |     |       |                   |
| C*03:161                                                 | 03:161         | HLA08215  |                                               | 0   | 0   | 2    | 0    | 0   | 0   | 0   | 2     |     |                                                      |      |      |     |     |     |       |                   |
| C*03:163                                                 | 03:163         | HLA08217  |                                               | 0   | 3   | 0    | 0    | 0   | 0   | 1   | 4     |     |                                                      |      |      |     |     |     |       |                   |
| C*03:165                                                 | 03:165         | HLA08477  |                                               | 0   | 0   | 3    | 0    | 0   | 0   | 0   | 3     |     |                                                      |      |      |     |     |     |       |                   |

| Supplemental Table 10: HLA-C Allele Summary <sup>a</sup> |                     |           | Allele Count by Population Group <sup>b</sup> |          |          |          |          |          |          |          |          |     | 3.0.0 CIWD Category by Population Group <sup>c</sup> |      |      |     |     |     |       |                   |
|----------------------------------------------------------|---------------------|-----------|-----------------------------------------------|----------|----------|----------|----------|----------|----------|----------|----------|-----|------------------------------------------------------|------|------|-----|-----|-----|-------|-------------------|
| Allele                                                   | Genomic typing      | Allele ID | G group                                       | AFA      | API      | EURO     | MENA     | HIS      | NAM      | UNK      | Total    | AFA | API                                                  | EURO | MENA | HIS | NAM | UNK | Total | Highest Frequency |
| C*03:166                                                 | 03:166              | HLA08530  |                                               | 0        | 0        | 1        | 0        | 0        | 0        | 0        | 1        |     |                                                      |      |      |     |     |     |       |                   |
| C*03:170                                                 | 03:170              | HLA08545  |                                               | 0        | 0        | 1        | 0        | 0        | 0        | 0        | 1        |     |                                                      |      |      |     |     |     |       |                   |
| C*03:172                                                 | 03:172              | HLA08764  |                                               | 0        | 0        | 0        | 0        | 1        | 0        | 0        | 1        |     |                                                      |      |      |     |     |     |       |                   |
| C*03:173                                                 | 03:173              | HLA08766  |                                               | 0        | 0        | 3        | 0        | 0        | 0        | 0        | 3        |     |                                                      |      |      |     |     |     |       |                   |
| C*03:174                                                 | 03:174              | HLA08767  |                                               | 0        | 0        | 1        | 0        | 0        | 0        | 3        | 4        |     |                                                      |      |      |     |     |     |       |                   |
| C*03:175                                                 | 03:175              | HLA08768  |                                               | 0        | 0        | 0        | 0        | 0        | 0        | 3        | 3        |     |                                                      |      |      |     |     |     |       |                   |
| C*03:176                                                 | 03:176              | HLA08812  |                                               | 0        | 0        | 0        | 0        | 0        | 0        | 1        | 1        |     |                                                      |      |      |     |     |     |       |                   |
| C*03:177                                                 | 03:177              | HLA08813  |                                               | 0        | 0        | 1        | 0        | 0        | 0        | 0        | 1        |     |                                                      |      |      |     |     |     |       |                   |
| C*03:178                                                 | 03:178              | HLA08814  |                                               | 0        | 0        | 0        | 0        | 1        | 1        | 0        | 2        |     |                                                      |      |      |     |     |     |       |                   |
| C*03:180                                                 | 03:180              | HLA08816  |                                               | 0        | 0        | 1        | 0        | 0        | 0        | 0        | 1        |     |                                                      |      |      |     |     |     |       |                   |
| <b>C*03:184 total</b>                                    | <b>03:184 total</b> |           |                                               | <b>0</b> | <b>0</b> | <b>2</b> | <b>0</b> | <b>0</b> | <b>0</b> | <b>0</b> | <b>2</b> |     |                                                      |      |      |     |     |     |       |                   |
| C*03:184                                                 | 03:184              |           |                                               | 0        | 0        | 2        | 0        | 0        | 0        | 0        | 2        |     |                                                      |      |      |     |     |     |       |                   |
| <b>C*03:186 total</b>                                    | <b>03:186 total</b> |           |                                               | <b>0</b> | <b>0</b> | <b>0</b> | <b>0</b> | <b>1</b> | <b>0</b> | <b>1</b> | <b>2</b> |     |                                                      |      |      |     |     |     |       |                   |
| C*03:186                                                 | 03:186              |           |                                               | 0        | 0        | 0        | 0        | 1        | 0        | 1        | 2        |     |                                                      |      |      |     |     |     |       |                   |
| C*03:187                                                 | 03:187              | HLA09198  |                                               | 0        | 1        | 0        | 0        | 0        | 0        | 0        | 1        |     |                                                      |      |      |     |     |     |       |                   |
| C*03:188                                                 | 03:188              | HLA09200  |                                               | 0        | 0        | 1        | 0        | 0        | 0        | 0        | 1        |     |                                                      |      |      |     |     |     |       |                   |
| C*03:189N                                                | 03:189N             | HLA09201  |                                               | 0        | 0        | 1        | 0        | 0        | 0        | 0        | 1        |     |                                                      |      |      |     |     |     |       |                   |
| C*03:191                                                 | 03:191              | HLA09597  |                                               | 0        | 0        | 0        | 0        | 0        | 1        | 0        | 1        |     |                                                      |      |      |     |     |     |       |                   |
| C*03:193                                                 | 03:193              | HLA09625  |                                               | 0        | 1        | 0        | 0        | 0        | 0        | 0        | 1        |     |                                                      |      |      |     |     |     |       |                   |
| C*03:197                                                 | 03:197              | HLA09943  |                                               | 0        | 1        | 0        | 0        | 0        | 0        | 0        | 1        |     |                                                      |      |      |     |     |     |       |                   |
| C*03:198                                                 | 03:198              | HLA09945  |                                               | 2        | 1        | 0        | 0        | 0        | 0        | 0        | 3        |     |                                                      |      |      |     |     |     |       |                   |
| C*03:210                                                 | 03:210              | HLA09979  |                                               | 0        | 0        | 1        | 0        | 0        | 0        | 0        | 1        |     |                                                      |      |      |     |     |     |       |                   |
| C*03:214                                                 | 03:214              | HLA10101  |                                               | 0        | 0        | 2        | 0        | 0        | 0        | 0        | 2        |     |                                                      |      |      |     |     |     |       |                   |
| C*03:215                                                 | 03:215              | HLA10102  |                                               | 0        | 0        | 0        | 0        | 1        | 0        | 0        | 1        |     |                                                      |      |      |     |     |     |       |                   |
| C*03:216                                                 | 03:216              | HLA10104  |                                               | 0        | 1        | 0        | 0        | 0        | 0        | 0        | 1        |     |                                                      |      |      |     |     |     |       |                   |
| C*03:217                                                 | 03:217              | HLA10106  |                                               | 0        | 0        | 3        | 0        | 0        | 0        | 0        | 3        |     |                                                      |      |      |     |     |     |       |                   |
| C*03:220                                                 | 03:220              | HLA10258  |                                               | 0        | 0        | 1        | 0        | 0        | 0        | 3        | 4        |     |                                                      |      |      |     |     |     |       |                   |
| C*03:222                                                 | 03:222              | HLA10442  |                                               | 0        | 1        | 0        | 0        | 0        | 0        | 0        | 1        |     |                                                      |      |      |     |     |     |       |                   |
| C*03:233                                                 | 03:233              | HLA10590  |                                               | 0        | 1        | 1        | 0        | 0        | 0        | 0        | 2        |     |                                                      |      |      |     |     |     |       |                   |
| C*03:243                                                 | 03:243              | HLA11264  |                                               | 0        | 0        | 2        | 0        | 0        | 0        | 0        | 2        |     |                                                      |      |      |     |     |     |       |                   |
| C*03:244Q                                                | 03:244Q             | HLA11265  |                                               | 0        | 0        | 1        | 0        | 0        | 0        | 0        | 1        |     |                                                      |      |      |     |     |     |       |                   |

| Supplemental Table 10: HLA-C Allele Summary <sup>a</sup> |                     |           | Allele Count by Population Group <sup>b</sup> |          |          |          |          |          |          |          |          | 3.0.0 CIWD Category by Population Group <sup>c</sup> |     |      |      |     |     |     |       |                   |
|----------------------------------------------------------|---------------------|-----------|-----------------------------------------------|----------|----------|----------|----------|----------|----------|----------|----------|------------------------------------------------------|-----|------|------|-----|-----|-----|-------|-------------------|
| Allele                                                   | Genomic typing      | Allele ID | G group                                       | AFA      | API      | EURO     | MENA     | HIS      | NAM      | UNK      | Total    | AFA                                                  | API | EURO | MENA | HIS | NAM | UNK | Total | Highest Frequency |
| C*03:247                                                 | 03:247              | HLA11572  |                                               | 0        | 0        | 1        | 0        | 0        | 0        | 0        | 1        |                                                      |     |      |      |     |     |     |       |                   |
| C*03:248                                                 | 03:248              | HLA11578  |                                               | 0        | 1        | 0        | 0        | 0        | 0        | 0        | 1        |                                                      |     |      |      |     |     |     |       |                   |
| C*03:250                                                 | 03:250              | HLA11668  |                                               | 0        | 0        | 4        | 0        | 0        | 0        | 0        | 4        |                                                      |     |      |      |     |     |     |       |                   |
| C*03:251                                                 | 03:251              | HLA11711  |                                               | 0        | 0        | 4        | 1        | 0        | 0        | 0        | 5        |                                                      |     |      |      |     |     |     | WD    | WD                |
| C*03:255                                                 | 03:255              | HLA11872  |                                               | 0        | 0        | 0        | 0        | 1        | 0        | 0        | 1        |                                                      |     |      |      |     |     |     |       |                   |
| C*03:257                                                 | 03:257              | HLA11875  |                                               | 0        | 0        | 0        | 0        | 1        | 0        | 0        | 1        |                                                      |     |      |      |     |     |     |       |                   |
| C*03:258                                                 | 03:258              | HLA12023  |                                               | 0        | 5        | 0        | 0        | 0        | 0        | 0        | 5        |                                                      | WD  |      |      |     |     |     | WD    | WD                |
| C*03:259                                                 | 03:259              | HLA11975  |                                               | 0        | 0        | 2        | 0        | 0        | 0        | 0        | 2        |                                                      |     |      |      |     |     |     |       |                   |
| <b>C*03:263 total</b>                                    | <b>03:263 total</b> |           |                                               | <b>0</b> | <b>0</b> | <b>0</b> | <b>0</b> | <b>1</b> | <b>0</b> | <b>0</b> | <b>1</b> |                                                      |     |      |      |     |     |     |       |                   |
| C*03:263                                                 | 03:263              |           |                                               | 0        | 0        | 0        | 0        | 1        | 0        | 0        | 1        |                                                      |     |      |      |     |     |     |       |                   |
| C*03:264                                                 | 03:264              | HLA12331  |                                               | 1        | 0        | 0        | 0        | 0        | 0        | 0        | 1        |                                                      |     |      |      |     |     |     |       |                   |
| C*03:269                                                 | 03:269              | HLA12511  |                                               | 0        | 0        | 0        | 1        | 0        | 0        | 0        | 1        |                                                      |     |      |      |     |     |     |       |                   |
| C*03:271                                                 | 03:271              | HLA12730  |                                               | 0        | 0        | 0        | 0        | 0        | 0        | 1        | 1        |                                                      |     |      |      |     |     |     |       |                   |
| C*03:272                                                 | 03:272              | HLA12782  |                                               | 0        | 1        | 2        | 0        | 0        | 0        | 0        | 3        |                                                      |     |      |      |     |     |     |       |                   |
| C*03:274                                                 | 03:274              | HLA12786  |                                               | 0        | 1        | 0        | 0        | 0        | 0        | 0        | 1        |                                                      |     |      |      |     |     |     |       |                   |
| C*03:275                                                 | 03:275              | HLA12787  |                                               | 0        | 0        | 1        | 0        | 0        | 0        | 0        | 1        |                                                      |     |      |      |     |     |     |       |                   |
| C*03:278                                                 | 03:278              | HLA13028  |                                               | 0        | 0        | 1        | 0        | 0        | 0        | 0        | 1        |                                                      |     |      |      |     |     |     |       |                   |
| C*03:282                                                 | 03:282              | HLA13260  |                                               | 0        | 0        | 0        | 0        | 2        | 0        | 0        | 2        |                                                      |     |      |      |     |     |     |       |                   |
| C*03:283                                                 | 03:283              | HLA13261  |                                               | 0        | 0        | 0        | 0        | 1        | 0        | 0        | 1        |                                                      |     |      |      |     |     |     |       |                   |
| C*03:286                                                 | 03:286              | HLA13420  |                                               | 0        | 0        | 1        | 0        | 0        | 0        | 0        | 1        |                                                      |     |      |      |     |     |     |       |                   |
| C*03:291                                                 | 03:291              | HLA13571  |                                               | 0        | 0        | 1        | 0        | 0        | 0        | 0        | 1        |                                                      |     |      |      |     |     |     |       |                   |
| C*03:296                                                 | 03:296              | HLA13670  |                                               | 1        | 0        | 0        | 0        | 0        | 0        | 0        | 1        |                                                      |     |      |      |     |     |     |       |                   |
| C*03:297                                                 | 03:297              | HLA13671  |                                               | 0        | 0        | 1        | 0        | 0        | 0        | 0        | 1        |                                                      |     |      |      |     |     |     |       |                   |
| C*03:298                                                 | 03:298              | HLA13802  |                                               | 0        | 3        | 0        | 0        | 0        | 0        | 0        | 3        |                                                      |     |      |      |     |     |     |       |                   |
| C*03:301                                                 | 03:301              | HLA14030  |                                               | 0        | 2        | 0        | 0        | 0        | 0        | 0        | 2        |                                                      |     |      |      |     |     |     |       |                   |
| C*03:305                                                 | 03:305              | HLA14261  |                                               | 0        | 1        | 0        | 0        | 0        | 0        | 0        | 1        |                                                      |     |      |      |     |     |     |       |                   |
| C*03:307                                                 | 03:307              | HLA14338  |                                               | 0        | 0        | 2        | 0        | 0        | 0        | 0        | 2        |                                                      |     |      |      |     |     |     |       |                   |
| C*03:308                                                 | 03:308              | HLA14537  |                                               | 0        | 0        | 1        | 0        | 0        | 0        | 1        | 2        |                                                      |     |      |      |     |     |     |       |                   |
| C*03:309                                                 | 03:309              | HLA14540  |                                               | 0        | 0        | 1        | 0        | 0        | 0        | 0        | 1        |                                                      |     |      |      |     |     |     |       |                   |
| C*03:316N                                                | 03:316N             | HLA14756  |                                               | 0        | 0        | 0        | 0        | 0        | 0        | 3        | 3        |                                                      |     |      |      |     |     |     |       |                   |
| C*03:317                                                 | 03:317              | HLA14860  |                                               | 0        | 0        | 4        | 0        | 0        | 0        | 0        | 4        |                                                      |     |      |      |     |     |     |       |                   |

| Supplemental Table 10: HLA-C Allele Summary <sup>a</sup> |                        |           | Allele Count by Population Group <sup>b</sup> |              |               |                |              |              |             |               |                | 3.0.0 CIWD Category by Population Group <sup>c</sup> |          |          |          |          |          |          |          |                   |
|----------------------------------------------------------|------------------------|-----------|-----------------------------------------------|--------------|---------------|----------------|--------------|--------------|-------------|---------------|----------------|------------------------------------------------------|----------|----------|----------|----------|----------|----------|----------|-------------------|
| Allele                                                   | Genomic typing         | Allele ID | G group                                       | AFA          | API           | EURO           | MENA         | HIS          | NAM         | UNK           | Total          | AFA                                                  | API      | EURO     | MENA     | HIS      | NAM      | UNK      | Total    | Highest Frequency |
| C*03:339                                                 | 03:339                 | HLA15917  |                                               | 0            | 0             | 1              | 0            | 0            | 0           | 0             | 1              |                                                      |          |          |          |          |          |          |          |                   |
| C*03:CODE                                                | 03:CODE                |           |                                               | 3213         | 8759          | 138196         | 1249         | 9269         | 1163        | 15038         | 176887         | NA                                                   | NA       | NA       | NA       | NA       | NA       | NA       | NA       | NA                |
| <b>C*04:01 total</b>                                     | <b>04:01 total</b>     |           |                                               | <b>67016</b> | <b>133186</b> | <b>1231317</b> | <b>66166</b> | <b>99890</b> | <b>8733</b> | <b>155605</b> | <b>1761913</b> | <b>C</b>                                             | <b>C</b> | <b>C</b> | <b>C</b> | <b>C</b> | <b>C</b> | <b>C</b> | <b>C</b> | <b>C</b>          |
| C*04:01                                                  | 04:01                  |           |                                               | 19           | 15            | 8266           | 25           | 58           | 0           | 509           | 8892           | WD                                                   | I        | C        | WD       | I        |          | C        | C        | C                 |
| C*04:01P                                                 | 04:01P                 |           |                                               | 3            | 9             | 2875           | 11           | 7            | 0           | 20            | 2925           |                                                      | WD       | C        | WD       | I        |          | I        | C        | C                 |
| <b>C*04:01:01G total</b>                                 | <b>04:01:01G total</b> |           |                                               | <b>67005</b> | <b>133148</b> | <b>1220374</b> | <b>66087</b> | <b>99872</b> | <b>8744</b> | <b>155060</b> | <b>1750290</b> | <b>C</b>                                             | <b>C</b> | <b>C</b> | <b>C</b> | <b>C</b> | <b>C</b> | <b>C</b> | <b>C</b> | <b>C</b>          |
| C*04:01:01G                                              | 04:01:01G              |           | 04:01:01G                                     | 54893        | 123519        | 1167870        | 64371        | 75008        | 6469        | 144159        | 1636289        | C                                                    | C        | C        | C        | C        | C        | C        | C        | C                 |
| C*04:01:01                                               | 04:01:01               |           | 04:01:01G                                     | 3356         | 2511          | 16169          | 551          | 7071         | 552         | 2959          | 33169          | C                                                    | C        | C        | C        | C        | C        | C        | C        | C                 |
| C*04:01:01:01                                            | 04:01:01:01            | HLA00420  | 04:01:01G                                     | 8397         | 5823          | 22600          | 616          | 14270        | 1421        | 5984          | 59111          | C                                                    | C        | C        | C        | C        | C        | C        | C        | C                 |
| C*04:01:01:02                                            | 04:01:01:02            | HLA01328  | 04:01:01G                                     | 1            | 1             | 1              | 0            | 0            | 0           | 0             | 3              |                                                      |          |          |          |          |          |          |          |                   |
| C*04:01:01:05                                            | 04:01:01:05            | HLA08080  | 04:01:01G                                     | 116          | 123           | 4209           | 18           | 740          | 59          | 581           | 5846           | C                                                    | I        | C        | WD       | C        | C        | C        | C        | C                 |
| C*04:01:01:06                                            | 04:01:01:06            | HLA13527  | 04:01:01G                                     | 207          | 560           | 8763           | 528          | 2632         | 229         | 1071          | 13990          | C                                                    | C        | C        | C        | C        | C        | C        | C        | C                 |
| C*04:01:01:08                                            | 04:01:01:08            | HLA16711  | 04:01:01G                                     | 1            | 0             | 4              | 0            | 0            | 0           | 0             | 5              |                                                      |          |          |          |          |          |          | WD       | WD                |
| C*04:01:01:10                                            | 04:01:01:10            | HLA16713  | 04:01:01G                                     | 0            | 0             | 0              | 0            | 1            | 0           | 0             | 1              |                                                      |          |          |          |          |          |          |          |                   |
| C*04:01:01:12                                            | 04:01:01:12            | HLA17055  | 04:01:01G                                     | 4            | 0             | 2              | 1            | 2            | 0           | 4             | 13             |                                                      |          |          |          |          |          |          | WD       | WD                |
| C*04:01:78                                               | 04:01:78               | HLA15574  | 04:01:01G                                     | 0            | 0             | 0              | 0            | 2            | 0           | 0             | 2              |                                                      |          |          |          |          |          |          |          |                   |
| C*04:01:79                                               | 04:01:79               | HLA15631  | 04:01:01G                                     | 0            | 0             | 38             | 0            | 1            | 1           | 9             | 49             |                                                      |          | WD       |          |          |          | WD       | WD       | WD                |
| C*04:09N                                                 | 04:09N                 | HLA01451  | 04:01:01G                                     | 26           | 1             | 689            | 1            | 133          | 13          | 125           | 988            | WD                                                   |          | I        |          | C        | C        | I        | I        | C                 |
| C*04:30                                                  | 04:30                  | HLA03122  | 04:01:01G                                     | 0            | 0             | 13             | 1            | 1            | 0           | 0             | 15             |                                                      |          | WD       |          |          |          |          | WD       | WD                |
| C*04:41                                                  | 04:41                  | HLA03832  | 04:01:01G                                     | 0            | 0             | 2              | 0            | 0            | 0           | 0             | 2              |                                                      |          |          |          |          |          |          |          |                   |
| C*04:82                                                  | 04:82                  | HLA05916  | 04:01:01G                                     | 1            | 608           | 9              | 0            | 8            | 0           | 165           | 791            |                                                      | C        | WD       |          | I        |          | C        | I        | C                 |
| C*04:144                                                 | 04:144                 | HLA09076  | 04:01:01G                                     | 3            | 1             | 0              | 0            | 1            | 0           | 1             | 6              |                                                      |          |          |          |          |          |          | WD       | WD                |
| C*04:146                                                 | 04:146                 | HLA09502  | 04:01:01G                                     | 0            | 0             | 0              | 0            | 2            | 0           | 2             | 4              |                                                      |          |          |          |          |          |          |          |                   |
| C*04:161                                                 | 04:161                 | HLA10255  | 04:01:01G                                     | 0            | 0             | 1              | 0            | 0            | 0           | 0             | 1              |                                                      |          |          |          |          |          |          |          |                   |
| C*04:195                                                 | 04:195                 | HLA12912  | 04:01:01G                                     | 0            | 1             | 0              | 0            | 0            | 0           | 0             | 1              |                                                      |          |          |          |          |          |          |          |                   |
| C*04:226                                                 | 04:226                 | HLA14220  | 04:01:01G                                     | 0            | 0             | 2              | 0            | 0            | 0           | 0             | 2              |                                                      |          |          |          |          |          |          |          |                   |
| C*04:267                                                 | 04:267                 | HLA16729  | 04:01:01G                                     | 0            | 0             | 2              | 0            | 0            | 0           | 0             | 2              |                                                      |          |          |          |          |          |          |          |                   |
| C*04:01:02                                               | 04:01:02               | HLA00421  |                                               | 1            | 0             | 0              | 0            | 0            | 0           | 0             | 1              |                                                      |          |          |          |          |          |          |          |                   |
| C*04:01:03                                               | 04:01:03               | HLA02086  |                                               | 1            | 0             | 5              | 1            | 62           | 0           | 9             | 78             |                                                      |          | WD       |          | I        |          | WD       | WD       | I                 |
| C*04:01:04                                               | 04:01:04               | HLA02434  |                                               | 0            | 0             | 0              | 4            | 1            | 0           | 0             | 5              |                                                      |          |          |          |          |          |          | WD       | WD                |
| C*04:01:07                                               | 04:01:07               | HLA03734  |                                               | 0            | 0             | 3              | 0            | 0            | 0           | 0             | 3              |                                                      |          |          |          |          |          |          |          |                   |



| Supplemental Table 10: HLA-C Allele Summary <sup>a</sup> |                |           | Allele Count by Population Group <sup>b</sup> |     |     |      |      |     |     |     |       | 3.0.0 CIWD Category by Population Group <sup>c</sup> |     |      |      |     |     |     |       |                   |
|----------------------------------------------------------|----------------|-----------|-----------------------------------------------|-----|-----|------|------|-----|-----|-----|-------|------------------------------------------------------|-----|------|------|-----|-----|-----|-------|-------------------|
| Allele                                                   | Genomic typing | Allele ID | G group                                       | AFA | API | EURO | MENA | HIS | NAM | UNK | Total | AFA                                                  | API | EURO | MENA | HIS | NAM | UNK | Total | Highest Frequency |
| C*04:01:08                                               | 04:01:08       | HLA03736  |                                               | 2   | 2   | 90   | 1    | 1   | 0   | 3   | 99    |                                                      |     | WD   |      |     |     |     | WD    | WD                |
| C*04:01:09                                               | 04:01:09       | HLA03802  |                                               | 2   | 1   | 18   | 7    | 0   | 0   | 4   | 32    |                                                      |     | WD   | WD   |     |     |     | WD    | WD                |
| C*04:01:10                                               | 04:01:10       | HLA03805  |                                               | 0   | 0   | 284  | 1    | 1   | 0   | 6   | 292   |                                                      |     | I    |      |     |     | WD  | I     | I                 |
| C*04:01:11                                               | 04:01:11       | HLA04254  |                                               | 1   | 1   | 1    | 0    | 0   | 0   | 0   | 3     |                                                      |     |      |      |     |     |     |       |                   |
| C*04:01:12                                               | 04:01:12       | HLA04286  |                                               | 2   | 0   | 0    | 0    | 0   | 0   | 2   | 4     |                                                      |     |      |      |     |     |     |       |                   |
| C*04:01:13                                               | 04:01:13       | HLA04590  |                                               | 0   | 0   | 31   | 0    | 0   | 0   | 0   | 31    |                                                      |     | WD   |      |     |     |     | WD    | WD                |
| C*04:01:14                                               | 04:01:14       | HLA04626  |                                               | 0   | 0   | 4    | 0    | 0   | 0   | 3   | 7     |                                                      |     |      |      |     |     |     | WD    | WD                |
| C*04:01:15                                               | 04:01:15       | HLA04574  |                                               | 0   | 0   | 7    | 0    | 0   | 0   | 0   | 7     |                                                      |     | WD   |      |     |     |     | WD    | WD                |
| C*04:01:16                                               | 04:01:16       | HLA04759  |                                               | 0   | 0   | 14   | 0    | 0   | 0   | 0   | 14    |                                                      |     | WD   |      |     |     |     | WD    | WD                |
| C*04:01:20                                               | 04:01:20       | HLA05219  |                                               | 0   | 0   | 1    | 0    | 1   | 0   | 0   | 2     |                                                      |     |      |      |     |     |     |       |                   |
| C*04:01:21                                               | 04:01:21       | HLA05403  |                                               | 0   | 0   | 0    | 0    | 1   | 0   | 0   | 1     |                                                      |     |      |      |     |     |     |       |                   |
| C*04:01:22                                               | 04:01:22       | HLA05560  |                                               | 0   | 0   | 2    | 0    | 0   | 0   | 0   | 2     |                                                      |     |      |      |     |     |     |       |                   |
| C*04:01:23                                               | 04:01:23       | HLA05569  |                                               | 0   | 1   | 4    | 2    | 0   | 0   | 1   | 8     |                                                      |     |      |      |     |     |     | WD    | WD                |
| C*04:01:24                                               | 04:01:24       | HLA05586  |                                               | 0   | 0   | 1    | 0    | 0   | 0   | 0   | 1     |                                                      |     |      |      |     |     |     |       |                   |
| C*04:01:25                                               | 04:01:25       | HLA05599  |                                               | 0   | 0   | 2    | 0    | 0   | 0   | 0   | 2     |                                                      |     |      |      |     |     |     |       |                   |
| C*04:01:26                                               | 04:01:26       | HLA05610  |                                               | 0   | 0   | 1    | 0    | 0   | 0   | 0   | 1     |                                                      |     |      |      |     |     |     |       |                   |
| C*04:01:27                                               | 04:01:27       | HLA06402  |                                               | 0   | 1   | 0    | 0    | 0   | 0   | 0   | 1     |                                                      |     |      |      |     |     |     |       |                   |
| C*04:01:28                                               | 04:01:28       | HLA06404  |                                               | 0   | 0   | 2    | 16   | 0   | 0   | 103 | 121   |                                                      |     |      | WD   |     |     | I   | WD    | I                 |
| C*04:01:29                                               | 04:01:29       | HLA06446  |                                               | 0   | 0   | 1    | 6    | 0   | 0   | 2   | 9     |                                                      |     |      | WD   |     |     |     | WD    | WD                |
| C*04:01:30                                               | 04:01:30       | HLA06532  |                                               | 0   | 0   | 3    | 1    | 0   | 0   | 1   | 5     |                                                      |     |      |      |     |     |     | WD    | WD                |
| C*04:01:33                                               | 04:01:33       | HLA07022  |                                               | 0   | 0   | 0    | 0    | 14  | 0   | 3   | 17    |                                                      |     |      |      | I   |     |     | WD    | I                 |
| C*04:01:34                                               | 04:01:34       | HLA07126  |                                               | 0   | 0   | 2    | 0    | 0   | 0   | 0   | 2     |                                                      |     |      |      |     |     |     |       |                   |
| C*04:01:37                                               | 04:01:37       | HLA07502  |                                               | 0   | 0   | 3    | 0    | 0   | 0   | 0   | 3     |                                                      |     |      |      |     |     |     |       |                   |
| C*04:01:39                                               | 04:01:39       | HLA07973  |                                               | 0   | 3   | 0    | 0    | 0   | 0   | 0   | 3     |                                                      |     |      |      |     |     |     |       |                   |
| C*04:01:41                                               | 04:01:41       | HLA08226  |                                               | 0   | 1   | 0    | 4    | 0   | 0   | 0   | 5     |                                                      |     |      |      |     |     |     | WD    | WD                |
| C*04:01:43                                               | 04:01:43       | HLA08826  |                                               | 0   | 0   | 1    | 0    | 1   | 0   | 0   | 2     |                                                      |     |      |      |     |     |     |       |                   |
| C*04:01:44                                               | 04:01:44       | HLA08827  |                                               | 0   | 0   | 0    | 0    | 1   | 1   | 2   | 4     |                                                      |     |      |      |     |     |     |       |                   |
| C*04:01:46                                               | 04:01:46       | HLA09044  |                                               | 1   | 0   | 0    | 0    | 0   | 0   | 0   | 1     |                                                      |     |      |      |     |     |     |       |                   |
| C*04:01:47                                               | 04:01:47       | HLA09048  |                                               | 0   | 2   | 0    | 0    | 0   | 0   | 0   | 2     |                                                      |     |      |      |     |     |     |       |                   |
| C*04:01:48                                               | 04:01:48       | HLA09050  |                                               | 3   | 0   | 0    | 0    | 0   | 0   | 0   | 3     |                                                      |     |      |      |     |     |     |       |                   |
| C*04:01:49                                               | 04:01:49       | HLA09205  |                                               | 1   | 0   | 0    | 0    | 0   | 0   | 0   | 1     |                                                      |     |      |      |     |     |     |       |                   |

| Supplemental Table 10: HLA-C Allele Summary <sup>a</sup> |                        |           | Allele Count by Population Group <sup>b</sup> |            |              |             |            |            |            |             |              | 3.0.0 CIWD Category by Population Group <sup>c</sup> |           |           |          |          |          |          |          |                   |
|----------------------------------------------------------|------------------------|-----------|-----------------------------------------------|------------|--------------|-------------|------------|------------|------------|-------------|--------------|------------------------------------------------------|-----------|-----------|----------|----------|----------|----------|----------|-------------------|
| Allele                                                   | Genomic typing         | Allele ID | G group                                       | AFA        | API          | EURO        | MENA       | HIS        | NAM        | UNK         | Total        | AFA                                                  | API       | EURO      | MENA     | HIS      | NAM      | UNK      | Total    | Highest Frequency |
| C*04:01:50                                               | 04:01:50               | HLA09206  |                                               | 0          | 0            | 0           | 0          | 0          | 1          | 0           | 1            |                                                      |           |           |          |          |          |          |          |                   |
| C*04:01:52                                               | 04:01:52               | HLA09631  |                                               | 0          | 0            | 3           | 0          | 0          | 0          | 0           | 3            |                                                      |           |           |          |          |          |          |          |                   |
| C*04:01:55                                               | 04:01:55               | HLA10536  |                                               | 0          | 0            | 0           | 1          | 0          | 0          | 0           | 1            |                                                      |           |           |          |          |          |          |          |                   |
| C*04:01:56                                               | 04:01:56               | HLA10598  |                                               | 0          | 0            | 2           | 0          | 0          | 0          | 0           | 2            |                                                      |           |           |          |          |          |          |          |                   |
| C*04:01:60                                               | 04:01:60               | HLA11584  |                                               | 0          | 0            | 0           | 0          | 1          | 0          | 1           | 2            |                                                      |           |           |          |          |          |          |          |                   |
| C*04:01:61                                               | 04:01:61               | HLA11585  |                                               | 1          | 0            | 0           | 0          | 0          | 0          | 0           | 1            |                                                      |           |           |          |          |          |          |          |                   |
| C*04:01:63                                               | 04:01:63               | HLA12201  |                                               | 0          | 0            | 1           | 0          | 1          | 0          | 0           | 2            |                                                      |           |           |          |          |          |          |          |                   |
| C*04:01:64                                               | 04:01:64               | HLA12348  |                                               | 0          | 0            | 0           | 0          | 1          | 0          | 0           | 1            |                                                      |           |           |          |          |          |          |          |                   |
| C*04:01:65                                               | 04:01:65               | HLA12517  |                                               | 0          | 0            | 2           | 0          | 0          | 0          | 0           | 2            |                                                      |           |           |          |          |          |          |          |                   |
| C*04:01:66                                               | 04:01:66               | HLA12717  |                                               | 0          | 0            | 1           | 0          | 0          | 0          | 0           | 1            |                                                      |           |           |          |          |          |          |          |                   |
| C*04:01:67                                               | 04:01:67               | HLA13267  |                                               | 0          | 0            | 0           | 0          | 0          | 0          | 1           | 1            |                                                      |           |           |          |          |          |          |          |                   |
| C*04:01:75                                               | 04:01:75               | HLA15189  |                                               | 0          | 1            | 0           | 0          | 0          | 0          | 0           | 1            |                                                      |           |           |          |          |          |          |          |                   |
| C*04:01:80                                               | 04:01:80               | HLA15913  |                                               | 0          | 2            | 0           | 0          | 0          | 0          | 0           | 2            |                                                      |           |           |          |          |          |          |          |                   |
| C*04:01:81                                               | 04:01:81               | HLA15803  |                                               | 0          | 0            | 2           | 0          | 0          | 0          | 0           | 2            |                                                      |           |           |          |          |          |          |          |                   |
| <b>C*04:03 total</b>                                     | <b>04:03 total</b>     |           |                                               | <b>75</b>  | <b>24089</b> | <b>2012</b> | <b>355</b> | <b>196</b> | <b>50</b>  | <b>2096</b> | <b>28873</b> | <b>C</b>                                             | <b>C</b>  | <b>C</b>  | <b>C</b> | <b>C</b> | <b>C</b> | <b>C</b> | <b>C</b> | <b>C</b>          |
| C*04:03                                                  | 04:03                  |           |                                               | 21         | 2844         | 386         | 41         | 43         | 13         | 395         | 3743         | WD                                                   | C         | I         | C        | I        | C        | C        | C        | C                 |
| C*04:03P                                                 | 04:03P                 |           |                                               | 0          | 0            | 1           | 0          | 0          | 0          | 0           | 1            |                                                      |           |           |          |          |          |          |          |                   |
| <b>C*04:03:01G total</b>                                 | <b>04:03:01G total</b> |           |                                               | <b>54</b>  | <b>21242</b> | <b>1625</b> | <b>314</b> | <b>153</b> | <b>37</b>  | <b>1701</b> | <b>25126</b> | <b>C</b>                                             | <b>C</b>  | <b>C</b>  | <b>C</b> | <b>C</b> | <b>C</b> | <b>C</b> | <b>C</b> | <b>C</b>          |
| C*04:03:01G                                              | 04:03:01G              |           | 04:03:01G                                     | 0          | 516          | 0           | 0          | 0          | 0          | 0           | 516          |                                                      | C         |           |          |          |          |          | I        | C                 |
| C*04:03:01                                               | 04:03:01               | HLA00423  | 04:03:01G                                     | 54         | 20726        | 1625        | 314        | 153        | 37         | 1701        | 24610        | C                                                    | C         | C         | C        | C        | C        | C        | C        | C                 |
| C*04:03:02                                               | 04:03:02               | HLA09716  |                                               | 0          | 3            | 0           | 0          | 0          | 0          | 0           | 3            |                                                      |           |           |          |          |          |          |          |                   |
| <b>C*04:04 total</b>                                     | <b>04:04 total</b>     |           |                                               | <b>180</b> | <b>10</b>    | <b>580</b>  | <b>108</b> | <b>309</b> | <b>199</b> | <b>558</b>  | <b>1944</b>  | <b>C</b>                                             | <b>WD</b> | <b>I</b>  | <b>C</b> | <b>C</b> | <b>C</b> | <b>C</b> | <b>C</b> | <b>C</b>          |
| C*04:04                                                  | 04:04                  |           |                                               | 11         | 1            | 50          | 8          | 34         | 7          | 29          | 140          | WD                                                   |           | WD        | WD       | I        | C        | I        | WD       | C                 |
| <b>C*04:04:01G total</b>                                 | <b>04:04:01G total</b> |           |                                               | <b>169</b> | <b>9</b>     | <b>529</b>  | <b>100</b> | <b>257</b> | <b>191</b> | <b>523</b>  | <b>1778</b>  | <b>C</b>                                             | <b>WD</b> | <b>I</b>  | <b>C</b> | <b>C</b> | <b>C</b> | <b>C</b> | <b>C</b> | <b>C</b>          |
| C*04:04:01G                                              | 04:04:01G              |           | 04:04:01G                                     | 2          | 2            | 21          | 2          | 13         | 2          | 12          | 54           |                                                      |           | WD        |          | I        |          | WD       | WD       | I                 |
| C*04:04:01                                               | 04:04:01               |           | 04:04:01G                                     | 167        | 7            | 504         | 97         | 238        | 186        | 500         | 1699         | C                                                    | WD        | I         | C        | C        | C        | C        | C        | C                 |
| C*04:04:01:01                                            | 04:04:01:01            | HLA00424  | 04:04:01G                                     | 0          | 0            | 3           | 1          | 5          | 3          | 11          | 23           |                                                      |           |           |          | WD       |          | WD       | WD       | WD                |
| C*04:04:01:02                                            | 04:04:01:02            | HLA16644  | 04:04:01G                                     | 0          | 0            | 1           | 0          | 1          | 0          | 0           | 2            |                                                      |           |           |          |          |          |          |          |                   |
| C*04:04:02                                               | 04:04:02               | HLA01831  |                                               | 0          | 0            | 1           | 0          | 18         | 1          | 6           | 26           |                                                      |           |           |          | I        |          | WD       | WD       | I                 |
| C*04:05                                                  | 04:05                  | HLA00425  |                                               | 3          | 1            | 97          | 0          | 1          | 0          | 5           | 107          |                                                      |           | WD        |          |          |          | WD       | WD       | WD                |
| <b>C*04:06 total</b>                                     | <b>04:06 total</b>     |           |                                               | <b>1</b>   | <b>1055</b>  | <b>43</b>   | <b>3</b>   | <b>4</b>   | <b>1</b>   | <b>198</b>  | <b>1305</b>  |                                                      | <b>C</b>  | <b>WD</b> |          |          |          | <b>C</b> | <b>I</b> | <b>C</b>          |

| Supplemental Table 10: HLA-C Allele Summary <sup>a</sup> |                    |           | Allele Count by Population Group <sup>b</sup> |          |          |           |          |          |          |           |           | 3.0.0 CIWD Category by Population Group <sup>c</sup> |     |           |      |     |     |           |           |                   |    |
|----------------------------------------------------------|--------------------|-----------|-----------------------------------------------|----------|----------|-----------|----------|----------|----------|-----------|-----------|------------------------------------------------------|-----|-----------|------|-----|-----|-----------|-----------|-------------------|----|
| Allele                                                   | Genomic typing     | Allele ID | G group                                       | AFA      | API      | EURO      | MENA     | HIS      | NAM      | UNK       | Total     | AFA                                                  | API | EURO      | MENA | HIS | NAM | UNK       | Total     | Highest Frequency |    |
| C*04:06                                                  | 04:06              |           |                                               | 1        | 1046     | 43        | 3        | 4        | 1        | 198       | 1296      |                                                      | C   | WD        |      |     |     | C         | I         | C                 |    |
| C*04:06:01                                               | 04:06:01           | HLA00426  |                                               | 0        | 9        | 0         | 0        | 0        | 0        | 0         | 9         |                                                      | WD  |           |      |     |     |           | WD        | WD                |    |
| C*04:07                                                  | 04:07              | HLA01078  |                                               | 775      | 13       | 179       | 211      | 93       | 6        | 393       | 1670      | C                                                    | I   | I         | C    | C   | WD  | C         | C         | C                 |    |
| C*04:08                                                  | 04:08              | HLA01311  |                                               | 107      | 0        | 22        | 0        | 7        | 2        | 28        | 166       | C                                                    |     | WD        |      | I   |     | I         | I         | C                 |    |
| C*04:10                                                  | 04:10              | HLA01645  |                                               | 2        | 1141     | 21        | 8        | 7        | 6        | 37        | 1222      |                                                      | C   | WD        | WD   | I   | WD  | I         | I         | C                 |    |
| C*04:11                                                  | 04:11              | HLA01711  |                                               | 1        | 0        | 80        | 0        | 0        | 1        | 8         | 90        |                                                      |     | WD        |      |     |     | WD        | WD        | WD                |    |
| C*04:12                                                  | 04:12              | HLA01825  |                                               | 0        | 0        | 18        | 0        | 2        | 0        | 3         | 23        |                                                      |     | WD        |      |     |     |           | WD        | WD                |    |
| C*04:13                                                  | 04:13              | HLA01851  |                                               | 199      | 2        | 19        | 1        | 18       | 6        | 53        | 298       | C                                                    |     | WD        |      | I   | WD  | I         | I         | C                 |    |
| C*04:14                                                  | 04:14              | HLA01853  |                                               | 5        | 0        | 10        | 16       | 0        | 0        | 0         | 31        | WD                                                   |     | WD        | WD   |     |     |           | WD        | WD                |    |
| <b>C*04:15 total</b>                                     | <b>04:15 total</b> |           |                                               | <b>4</b> | <b>1</b> | <b>66</b> | <b>1</b> | <b>4</b> | <b>1</b> | <b>13</b> | <b>90</b> |                                                      |     | <b>WD</b> |      |     |     | <b>WD</b> | <b>WD</b> | <b>WD</b>         |    |
| C*04:15                                                  | 04:15              |           |                                               | 0        | 0        | 6         | 0        | 1        | 0        | 0         | 7         |                                                      |     | WD        |      |     |     |           | WD        | WD                |    |
| C*04:15:01                                               | 04:15:01           | HLA01859  |                                               | 4        | 0        | 0         | 0        | 0        | 0        | 1         | 5         |                                                      |     |           |      |     |     |           | WD        | WD                |    |
| C*04:15:02                                               | 04:15:02           | HLA03106  |                                               | 0        | 1        | 60        | 1        | 3        | 1        | 12        | 78        |                                                      |     | WD        |      |     |     | WD        | WD        | WD                |    |
| C*04:16                                                  | 04:16              | HLA02193  |                                               | 0        | 3        | 28        | 0        | 0        | 0        | 1         | 32        |                                                      |     | WD        |      |     |     |           | WD        | WD                |    |
| C*04:17                                                  | 04:17              | HLA02241  |                                               | 1        | 0        | 1         | 0        | 23       | 1        | 2         | 28        |                                                      |     |           |      | I   |     |           | WD        | I                 |    |
| C*04:19                                                  | 04:19              | HLA02511  |                                               | 1        | 0        | 4         | 0        | 101      | 10       | 13        | 129       |                                                      |     |           |      | C   | C   | WD        | WD        | C                 |    |
| C*04:20                                                  | 04:20              | HLA02525  |                                               | 0        | 0        | 1         | 0        | 0        | 0        | 0         | 1         |                                                      |     |           |      |     |     |           |           |                   |    |
| C*04:23                                                  | 04:23              | HLA02621  |                                               | 0        | 1        | 4         | 0        | 0        | 0        | 0         | 5         |                                                      |     |           |      |     |     |           | WD        | WD                |    |
| C*04:24                                                  | 04:24              | HLA02622  |                                               | 0        | 0        | 24        | 0        | 3        | 0        | 4         | 31        |                                                      |     | WD        |      |     |     |           | WD        | WD                |    |
| C*04:25                                                  | 04:25              | HLA02822  |                                               | 0        | 1        | 1         | 0        | 0        | 0        | 0         | 2         |                                                      |     |           |      |     |     |           |           |                   |    |
| C*04:26                                                  | 04:26              | HLA02824  |                                               | 4        | 59       | 1         | 0        | 0        | 0        | 2         | 66        |                                                      | I   |           |      |     |     |           | WD        | I                 |    |
| C*04:27                                                  | 04:27              | HLA02831  |                                               | 54       | 0        | 1         | 0        | 1        | 1        | 6         | 63        | C                                                    |     |           |      |     |     |           | WD        | WD                | C  |
| C*04:29                                                  | 04:29              | HLA03077  |                                               | 0        | 10       | 24        | 12       | 1        | 1        | 5         | 53        |                                                      | WD  | WD        | WD   |     |     |           | WD        | WD                | WD |
| C*04:32                                                  | 04:32              | HLA03214  |                                               | 1        | 0        | 9         | 0        | 1        | 0        | 0         | 11        |                                                      |     | WD        |      |     |     |           | WD        | WD                |    |
| C*04:33                                                  | 04:33              | HLA03364  |                                               | 6        | 6        | 25        | 12       | 6        | 0        | 7         | 62        | WD                                                   | WD  | WD        | WD   | WD  |     |           | WD        | WD                | WD |
| C*04:34                                                  | 04:34              | HLA03404  |                                               | 6        | 0        | 0         | 0        | 0        | 0        | 0         | 6         | WD                                                   |     |           |      |     |     |           | WD        | WD                |    |
| C*04:35                                                  | 04:35              | HLA03430  |                                               | 0        | 0        | 3         | 0        | 0        | 0        | 0         | 3         |                                                      |     |           |      |     |     |           |           |                   |    |
| C*04:36                                                  | 04:36              | HLA03437  |                                               | 5        | 2        | 4         | 0        | 0        | 0        | 2         | 13        | WD                                                   |     |           |      |     |     |           | WD        | WD                |    |
| C*04:37                                                  | 04:37              | HLA03527  |                                               | 0        | 1        | 70        | 0        | 0        | 0        | 2         | 73        |                                                      |     | WD        |      |     |     |           | WD        | WD                |    |
| C*04:39                                                  | 04:39              | HLA03735  |                                               | 0        | 0        | 1         | 9        | 0        | 0        | 1         | 11        |                                                      |     |           | WD   |     |     |           | WD        | WD                |    |
| C*04:40                                                  | 04:40              | HLA03699  |                                               | 13       | 0        | 0         | 1        | 0        | 0        | 1         | 15        | WD                                                   |     |           |      |     |     |           | WD        | WD                |    |

| Supplemental Table 10: HLA-C Allele Summary <sup>a</sup> |                    |           | Allele Count by Population Group <sup>b</sup> |     |     |      |      |     |     |     |       | 3.0.0 CIWD Category by Population Group <sup>c</sup> |     |      |      |     |     |     |       |                   |
|----------------------------------------------------------|--------------------|-----------|-----------------------------------------------|-----|-----|------|------|-----|-----|-----|-------|------------------------------------------------------|-----|------|------|-----|-----|-----|-------|-------------------|
| Allele                                                   | Genomic typing     | Allele ID | G group                                       | AFA | API | EURO | MENA | HIS | NAM | UNK | Total | AFA                                                  | API | EURO | MENA | HIS | NAM | UNK | Total | Highest Frequency |
| <b>C*04:42 total</b>                                     | <b>04:42 total</b> |           |                                               | 0   | 0   | 1    | 1    | 0   | 0   | 0   | 2     |                                                      |     |      |      |     |     |     |       |                   |
| C*04:42:02                                               | 04:42:02           | HLA11853  |                                               | 0   | 0   | 1    | 1    | 0   | 0   | 0   | 2     |                                                      |     |      |      |     |     |     |       |                   |
| C*04:43                                                  | 04:43              | HLA04276  |                                               | 0   | 0   | 3    | 0    | 0   | 0   | 1   | 4     |                                                      |     |      |      |     |     |     |       |                   |
| C*04:45                                                  | 04:45              | HLA04300  |                                               | 0   | 0   | 21   | 0    | 0   | 0   | 0   | 21    |                                                      |     | WD   |      |     |     |     | WD    | WD                |
| C*04:46                                                  | 04:46              | HLA04301  |                                               | 0   | 0   | 2    | 0    | 23  | 0   | 2   | 27    |                                                      |     |      |      | I   |     |     | WD    | I                 |
| C*04:47                                                  | 04:47              | HLA04303  |                                               | 0   | 0   | 27   | 0    | 0   | 0   | 0   | 27    |                                                      |     | WD   |      |     |     |     | WD    | WD                |
| C*04:48                                                  | 04:48              | HLA04309  |                                               | 0   | 0   | 1    | 0    | 0   | 0   | 0   | 1     |                                                      |     |      |      |     |     |     |       |                   |
| C*04:49                                                  | 04:49              | HLA04395  |                                               | 0   | 0   | 1    | 0    | 0   | 0   | 0   | 1     |                                                      |     |      |      |     |     |     |       |                   |
| C*04:50                                                  | 04:50              | HLA04610  |                                               | 0   | 0   | 2    | 0    | 0   | 0   | 1   | 3     |                                                      |     |      |      |     |     |     |       |                   |
| C*04:52                                                  | 04:52              | HLA04617  |                                               | 4   | 0   | 7    | 0    | 1   | 0   | 4   | 16    |                                                      |     | WD   |      |     |     |     | WD    | WD                |
| C*04:53                                                  | 04:53              | HLA04625  |                                               | 2   | 0   | 0    | 0    | 0   | 0   | 0   | 2     |                                                      |     |      |      |     |     |     |       |                   |
| C*04:54                                                  | 04:54              | HLA04695  |                                               | 0   | 1   | 12   | 1    | 0   | 0   | 2   | 16    |                                                      |     | WD   |      |     |     |     | WD    | WD                |
| C*04:55                                                  | 04:55              | HLA04696  |                                               | 0   | 0   | 5    | 0    | 0   | 0   | 0   | 5     |                                                      |     | WD   |      |     |     |     | WD    | WD                |
| C*04:56                                                  | 04:56              | HLA04763  |                                               | 0   | 0   | 32   | 0    | 0   | 0   | 0   | 32    |                                                      |     | WD   |      |     |     |     | WD    | WD                |
| C*04:58                                                  | 04:58              | HLA04838  |                                               | 0   | 1   | 3    | 0    | 0   | 0   | 0   | 4     |                                                      |     |      |      |     |     |     |       |                   |
| C*04:59Q                                                 | 04:59Q             | HLA04841  |                                               | 0   | 0   | 24   | 0    | 1   | 0   | 1   | 26    |                                                      |     | WD   |      |     |     |     | WD    | WD                |
| C*04:61                                                  | 04:61              | HLA04843  |                                               | 0   | 0   | 3    | 0    | 0   | 0   | 1   | 4     |                                                      |     |      |      |     |     |     |       |                   |
| C*04:62                                                  | 04:62              | HLA04851  |                                               | 0   | 0   | 4    | 0    | 0   | 0   | 0   | 4     |                                                      |     |      |      |     |     |     |       |                   |
| C*04:63                                                  | 04:63              | HLA05166  |                                               | 0   | 0   | 12   | 0    | 0   | 0   | 3   | 15    |                                                      |     | WD   |      |     |     |     | WD    | WD                |
| <b>C*04:64 total</b>                                     | <b>04:64 total</b> |           |                                               | 0   | 0   | 1    | 0    | 0   | 0   | 0   | 1     |                                                      |     |      |      |     |     |     |       |                   |
| C*04:64:02                                               | 04:64:02           | HLA08223  |                                               | 0   | 0   | 1    | 0    | 0   | 0   | 0   | 1     |                                                      |     |      |      |     |     |     |       |                   |
| C*04:65                                                  | 04:65              | HLA05170  |                                               | 0   | 0   | 24   | 4    | 3   | 0   | 3   | 34    |                                                      |     | WD   |      |     |     |     | WD    | WD                |
| C*04:66                                                  | 04:66              | HLA05175  |                                               | 0   | 0   | 1    | 0    | 0   | 0   | 0   | 1     |                                                      |     |      |      |     |     |     |       |                   |
| C*04:67                                                  | 04:67              | HLA05191  |                                               | 0   | 0   | 1    | 0    | 0   | 0   | 0   | 1     |                                                      |     |      |      |     |     |     |       |                   |
| C*04:69                                                  | 04:69              | HLA05218  |                                               | 0   | 2   | 1    | 0    | 0   | 0   | 0   | 3     |                                                      |     |      |      |     |     |     |       |                   |
| C*04:70                                                  | 04:70              | HLA05414  |                                               | 0   | 2   | 1    | 0    | 0   | 0   | 2   | 5     |                                                      |     |      |      |     |     |     | WD    | WD                |
| C*04:71                                                  | 04:71              | HLA05543  |                                               | 0   | 0   | 5    | 0    | 3   | 0   | 4   | 12    |                                                      |     | WD   |      |     |     |     | WD    | WD                |
| C*04:72                                                  | 04:72              | HLA05573  |                                               | 0   | 0   | 3    | 0    | 0   | 0   | 0   | 3     |                                                      |     |      |      |     |     |     |       |                   |
| C*04:73                                                  | 04:73              | HLA05592  |                                               | 0   | 0   | 1    | 0    | 0   | 0   | 0   | 1     |                                                      |     |      |      |     |     |     |       |                   |
| C*04:75                                                  | 04:75              | HLA05604  |                                               | 0   | 0   | 14   | 0    | 0   | 0   | 2   | 16    |                                                      |     | WD   |      |     |     |     | WD    | WD                |
| C*04:77                                                  | 04:77              | HLA05739  |                                               | 0   | 0   | 63   | 0    | 0   | 0   | 1   | 64    |                                                      |     | WD   |      |     |     |     | WD    | WD                |

| Supplemental Table 10: HLA-C Allele Summary <sup>a</sup> |                    |           | Allele Count by Population Group <sup>b</sup> |          |          |          |          |          |          |          |          |     | 3.0.0 CIWD Category by Population Group <sup>c</sup> |      |      |     |     |     |       |                   |
|----------------------------------------------------------|--------------------|-----------|-----------------------------------------------|----------|----------|----------|----------|----------|----------|----------|----------|-----|------------------------------------------------------|------|------|-----|-----|-----|-------|-------------------|
| Allele                                                   | Genomic typing     | Allele ID | G group                                       | AFA      | API      | EURO     | MENA     | HIS      | NAM      | UNK      | Total    | AFA | API                                                  | EURO | MENA | HIS | NAM | UNK | Total | Highest Frequency |
| C*04:78                                                  | 04:78              | HLA05745  |                                               | 0        | 0        | 3        | 0        | 0        | 0        | 0        | 3        |     |                                                      |      |      |     |     |     |       |                   |
| C*04:81                                                  | 04:81              | HLA05883  |                                               | 0        | 3        | 0        | 0        | 0        | 0        | 0        | 3        |     |                                                      |      |      |     |     |     |       |                   |
| C*04:83                                                  | 04:83              | HLA05947  |                                               | 0        | 0        | 3        | 0        | 0        | 0        | 0        | 3        |     |                                                      |      |      |     |     |     |       |                   |
| C*04:85                                                  | 04:85              | HLA06385  |                                               | 0        | 0        | 1        | 0        | 1        | 0        | 0        | 2        |     |                                                      |      |      |     |     |     |       |                   |
| C*04:86                                                  | 04:86              | HLA06401  |                                               | 0        | 0        | 18       | 0        | 0        | 0        | 0        | 18       |     |                                                      | WD   |      |     |     |     | WD    | WD                |
| C*04:87                                                  | 04:87              | HLA06403  |                                               | 1        | 3        | 0        | 1        | 0        | 0        | 0        | 5        |     |                                                      |      |      |     |     |     | WD    | WD                |
| C*04:88N                                                 | 04:88N             | HLA06422  |                                               | 0        | 0        | 0        | 1        | 0        | 0        | 1        | 2        |     |                                                      |      |      |     |     |     |       |                   |
| C*04:89                                                  | 04:89              | HLA06436  |                                               | 0        | 3        | 0        | 0        | 0        | 0        | 1        | 4        |     |                                                      |      |      |     |     |     |       |                   |
| C*04:90                                                  | 04:90              | HLA06665  |                                               | 0        | 0        | 1        | 0        | 0        | 0        | 0        | 1        |     |                                                      |      |      |     |     |     |       |                   |
| C*04:91                                                  | 04:91              | HLA06730  |                                               | 0        | 0        | 2        | 0        | 0        | 0        | 0        | 2        |     |                                                      |      |      |     |     |     |       |                   |
| C*04:93N                                                 | 04:93N             | HLA07009  |                                               | 0        | 0        | 7        | 0        | 0        | 0        | 1        | 8        |     |                                                      | WD   |      |     |     |     | WD    | WD                |
| <b>C*04:94 total</b>                                     | <b>04:94 total</b> |           |                                               | <b>0</b> | <b>1</b> | <b>1</b> | <b>0</b> | <b>0</b> | <b>0</b> | <b>1</b> | <b>3</b> |     |                                                      |      |      |     |     |     |       |                   |
| C*04:94:01                                               | 04:94:01           | HLA07010  |                                               | 0        | 1        | 1        | 0        | 0        | 0        | 1        | 3        |     |                                                      |      |      |     |     |     |       |                   |
| C*04:95N                                                 | 04:95N             | HLA07017  |                                               | 0        | 0        | 6        | 0        | 0        | 0        | 0        | 6        |     |                                                      | WD   |      |     |     |     | WD    | WD                |
| C*04:96                                                  | 04:96              | HLA07018  |                                               | 0        | 1        | 25       | 0        | 0        | 0        | 0        | 26       |     |                                                      | WD   |      |     |     |     | WD    | WD                |
| C*04:97                                                  | 04:97              | HLA07019  |                                               | 0        | 0        | 0        | 0        | 1        | 0        | 0        | 1        |     |                                                      |      |      |     |     |     |       |                   |
| <b>C*04:98 total</b>                                     | <b>04:98 total</b> |           |                                               | <b>0</b> | <b>0</b> | <b>0</b> | <b>0</b> | <b>0</b> | <b>0</b> | <b>1</b> | <b>1</b> |     |                                                      |      |      |     |     |     |       |                   |
| C*04:98:02                                               | 04:98:02           | HLA09045  |                                               | 0        | 0        | 0        | 0        | 0        | 0        | 1        | 1        |     |                                                      |      |      |     |     |     |       |                   |
| C*04:99                                                  | 04:99              | HLA07026  |                                               | 0        | 0        | 3        | 0        | 0        | 0        | 0        | 3        |     |                                                      |      |      |     |     |     |       |                   |
| C*04:102                                                 | 04:102             | HLA07120  |                                               | 0        | 0        | 1        | 0        | 0        | 0        | 0        | 1        |     |                                                      |      |      |     |     |     |       |                   |
| C*04:104                                                 | 04:104             | HLA07142  |                                               | 0        | 0        | 4        | 0        | 0        | 0        | 1        | 5        |     |                                                      |      |      |     |     |     | WD    | WD                |
| C*04:105N                                                | 04:105N            | HLA07243  |                                               | 0        | 0        | 2        | 0        | 0        | 0        | 0        | 2        |     |                                                      |      |      |     |     |     |       |                   |
| C*04:107                                                 | 04:107             | HLA07406  |                                               | 0        | 1        | 0        | 0        | 0        | 0        | 0        | 1        |     |                                                      |      |      |     |     |     |       |                   |
| C*04:108                                                 | 04:108             | HLA07499  |                                               | 0        | 0        | 4        | 2        | 0        | 0        | 0        | 6        |     |                                                      |      |      |     |     |     | WD    | WD                |
| C*04:109                                                 | 04:109             | HLA07500  |                                               | 0        | 0        | 0        | 0        | 1        | 0        | 0        | 1        |     |                                                      |      |      |     |     |     |       |                   |
| C*04:110                                                 | 04:110             | HLA07501  |                                               | 0        | 0        | 3        | 0        | 0        | 0        | 0        | 3        |     |                                                      |      |      |     |     |     |       |                   |
| C*04:112                                                 | 04:112             | HLA07755  |                                               | 0        | 0        | 2        | 0        | 0        | 0        | 0        | 2        |     |                                                      |      |      |     |     |     |       |                   |
| C*04:113                                                 | 04:113             | HLA07970  |                                               | 1        | 0        | 1        | 0        | 3        | 1        | 2        | 8        |     |                                                      |      |      |     |     |     | WD    | WD                |
| C*04:114                                                 | 04:114             | HLA07971  |                                               | 4        | 0        | 6        | 0        | 0        | 0        | 1        | 11       |     |                                                      | WD   |      |     |     |     | WD    | WD                |
| C*04:116                                                 | 04:116             | HLA07974  |                                               | 0        | 0        | 1        | 1        | 0        | 0        | 0        | 2        |     |                                                      |      |      |     |     |     |       |                   |
| C*04:117                                                 | 04:117             | HLA07975  |                                               | 0        | 4        | 0        | 0        | 0        | 0        | 0        | 4        |     |                                                      |      |      |     |     |     |       |                   |

| Supplemental Table 10: HLA-C Allele Summary <sup>a</sup> |                |           | Allele Count by Population Group <sup>b</sup> |     |     |      |      |     |     |     |       |     | 3.0.0 CIWD Category by Population Group <sup>c</sup> |      |      |     |     |     |       |                   |
|----------------------------------------------------------|----------------|-----------|-----------------------------------------------|-----|-----|------|------|-----|-----|-----|-------|-----|------------------------------------------------------|------|------|-----|-----|-----|-------|-------------------|
| Allele                                                   | Genomic typing | Allele ID | G group                                       | AFA | API | EURO | MENA | HIS | NAM | UNK | Total | AFA | API                                                  | EURO | MENA | HIS | NAM | UNK | Total | Highest Frequency |
| C*04:118                                                 | 04:118         | HLA08022  |                                               | 0   | 0   | 7    | 0    | 0   | 0   | 0   | 7     |     |                                                      | WD   |      |     |     |     | WD    | WD                |
| C*04:120                                                 | 04:120         | HLA08171  |                                               | 0   | 0   | 2    | 0    | 0   | 0   | 0   | 2     |     |                                                      |      |      |     |     |     |       |                   |
| C*04:121                                                 | 04:121         | HLA08172  |                                               | 4   | 0   | 0    | 0    | 0   | 0   | 1   | 5     |     |                                                      |      |      |     |     |     | WD    | WD                |
| C*04:122                                                 | 04:122         | HLA08173  |                                               | 0   | 0   | 1    | 0    | 2   | 0   | 0   | 3     |     |                                                      |      |      |     |     |     |       |                   |
| C*04:123N                                                | 04:123N        | HLA08174  |                                               | 0   | 1   | 0    | 0    | 0   | 0   | 0   | 1     |     |                                                      |      |      |     |     |     |       |                   |
| C*04:124                                                 | 04:124         | HLA08221  |                                               | 0   | 0   | 2    | 0    | 2   | 0   | 0   | 4     |     |                                                      |      |      |     |     |     |       |                   |
| C*04:125                                                 | 04:125         | HLA08222  |                                               | 0   | 0   | 7    | 0    | 0   | 0   | 0   | 7     |     |                                                      | WD   |      |     |     |     | WD    | WD                |
| C*04:126                                                 | 04:126         | HLA08224  |                                               | 0   | 0   | 1    | 0    | 0   | 0   | 0   | 1     |     |                                                      |      |      |     |     |     |       |                   |
| C*04:127                                                 | 04:127         | HLA08227  |                                               | 0   | 0   | 3    | 0    | 0   | 0   | 0   | 3     |     |                                                      |      |      |     |     |     |       |                   |
| C*04:128                                                 | 04:128         | HLA08413  |                                               | 0   | 0   | 0    | 0    | 2   | 0   | 0   | 2     |     |                                                      |      |      |     |     |     |       |                   |
| C*04:130                                                 | 04:130         | HLA08542  |                                               | 0   | 1   | 0    | 0    | 0   | 0   | 0   | 1     |     |                                                      |      |      |     |     |     |       |                   |
| C*04:131                                                 | 04:131         | HLA08543  |                                               | 0   | 1   | 3    | 0    | 6   | 0   | 0   | 10    |     |                                                      |      |      | WD  |     |     | WD    | WD                |
| C*04:132                                                 | 04:132         | HLA08544  |                                               | 0   | 0   | 5    | 7    | 0   | 0   | 0   | 12    |     |                                                      | WD   | WD   |     |     |     | WD    | WD                |
| C*04:133                                                 | 04:133         | HLA08822  |                                               | 0   | 1   | 1    | 0    | 0   | 0   | 0   | 2     |     |                                                      |      |      |     |     |     |       |                   |
| C*04:134                                                 | 04:134         | HLA08823  |                                               | 0   | 0   | 0    | 0    | 0   | 0   | 1   | 1     |     |                                                      |      |      |     |     |     |       |                   |
| C*04:137                                                 | 04:137         | HLA08829  |                                               | 0   | 0   | 0    | 3    | 0   | 0   | 0   | 3     |     |                                                      |      |      |     |     |     |       |                   |
| C*04:138                                                 | 04:138         | HLA08830  |                                               | 0   | 0   | 0    | 0    | 0   | 0   | 1   | 1     |     |                                                      |      |      |     |     |     |       |                   |
| C*04:139                                                 | 04:139         | HLA08832  |                                               | 0   | 0   | 8    | 0    | 0   | 0   | 0   | 8     |     |                                                      | WD   |      |     |     |     | WD    | WD                |
| C*04:141                                                 | 04:141         | HLA09046  |                                               | 0   | 0   | 0    | 5    | 1   | 0   | 2   | 8     |     |                                                      |      | WD   |     |     |     | WD    | WD                |
| C*04:142                                                 | 04:142         | HLA09047  |                                               | 0   | 0   | 4    | 0    | 0   | 0   | 0   | 4     |     |                                                      |      |      |     |     |     |       |                   |
| C*04:143                                                 | 04:143         | HLA09049  |                                               | 0   | 0   | 2    | 0    | 0   | 0   | 0   | 2     |     |                                                      |      |      |     |     |     |       |                   |
| C*04:145                                                 | 04:145         | HLA09176  |                                               | 0   | 0   | 1    | 0    | 0   | 0   | 0   | 1     |     |                                                      |      |      |     |     |     |       |                   |
| C*04:150                                                 | 04:150         | HLA09630  |                                               | 0   | 0   | 8    | 0    | 0   | 0   | 0   | 8     |     |                                                      | WD   |      |     |     |     | WD    | WD                |
| C*04:153                                                 | 04:153         | HLA09907  |                                               | 0   | 2   | 6    | 0    | 0   | 0   | 2   | 10    |     |                                                      | WD   |      |     |     |     | WD    | WD                |
| C*04:155                                                 | 04:155         | HLA10109  |                                               | 2   | 0   | 1    | 0    | 0   | 0   | 2   | 5     |     |                                                      |      |      |     |     |     | WD    | WD                |
| C*04:163                                                 | 04:163         | HLA10537  |                                               | 0   | 5   | 1    | 0    | 0   | 0   | 0   | 6     |     | WD                                                   |      |      |     |     |     | WD    | WD                |
| C*04:166                                                 | 04:166         | HLA11120  |                                               | 0   | 1   | 0    | 0    | 0   | 0   | 1   | 2     |     |                                                      |      |      |     |     |     |       |                   |
| C*04:169                                                 | 04:169         | HLA11345  |                                               | 0   | 4   | 0    | 0    | 0   | 0   | 0   | 4     |     |                                                      |      |      |     |     |     |       |                   |
| C*04:171                                                 | 04:171         | HLA11573  |                                               | 0   | 1   | 0    | 0    | 0   | 0   | 0   | 1     |     |                                                      |      |      |     |     |     |       |                   |
| C*04:172                                                 | 04:172         | HLA11583  |                                               | 0   | 2   | 0    | 0    | 0   | 0   | 0   | 2     |     |                                                      |      |      |     |     |     |       |                   |
| C*04:173N                                                | 04:173N        | HLA11670  |                                               | 0   | 0   | 1    | 0    | 0   | 0   | 0   | 1     |     |                                                      |      |      |     |     |     |       |                   |

| Supplemental Table 10: HLA-C Allele Summary <sup>a</sup> |                     |           | Allele Count by Population Group <sup>b</sup> |          |          |          |          |          |          |          |          | 3.0.0 CIWD Category by Population Group <sup>c</sup> |     |      |      |     |     |     |           |                   |
|----------------------------------------------------------|---------------------|-----------|-----------------------------------------------|----------|----------|----------|----------|----------|----------|----------|----------|------------------------------------------------------|-----|------|------|-----|-----|-----|-----------|-------------------|
| Allele                                                   | Genomic typing      | Allele ID | G group                                       | AFA      | API      | EURO     | MENA     | HIS      | NAM      | UNK      | Total    | AFA                                                  | API | EURO | MENA | HIS | NAM | UNK | Total     | Highest Frequency |
| C*04:177                                                 | 04:177              | HLA12149  |                                               | 1        | 0        | 1        | 1        | 0        | 0        | 0        | 3        |                                                      |     |      |      |     |     |     |           |                   |
| C*04:178                                                 | 04:178              | HLA12203  |                                               | 0        | 0        | 1        | 0        | 0        | 0        | 0        | 1        |                                                      |     |      |      |     |     |     |           |                   |
| <b>C*04:180 total</b>                                    | <b>04:180 total</b> |           |                                               | <b>3</b> | <b>0</b> | <b>3</b> | <b>0</b> | <b>0</b> | <b>0</b> | <b>3</b> | <b>9</b> |                                                      |     |      |      |     |     |     | <b>WD</b> | <b>WD</b>         |
| C*04:180                                                 | 04:180              |           |                                               | 2        | 0        | 1        | 0        | 0        | 0        | 2        | 5        |                                                      |     |      |      |     |     |     | WD        | WD                |
| C*04:180:01                                              | 04:180:01           | HLA12347  |                                               | 1        | 0        | 0        | 0        | 0        | 0        | 1        | 2        |                                                      |     |      |      |     |     |     |           |                   |
| C*04:180:02                                              | 04:180:02           | HLA13806  |                                               | 0        | 0        | 2        | 0        | 0        | 0        | 0        | 2        |                                                      |     |      |      |     |     |     |           |                   |
| C*04:181                                                 | 04:181              | HLA12349  |                                               | 0        | 0        | 1        | 0        | 0        | 0        | 0        | 1        |                                                      |     |      |      |     |     |     |           |                   |
| C*04:182                                                 | 04:182              | HLA12513  |                                               | 0        | 0        | 0        | 0        | 2        | 2        | 0        | 4        |                                                      |     |      |      |     |     |     |           |                   |
| C*04:185                                                 | 04:185              | HLA12516  |                                               | 0        | 0        | 1        | 0        | 1        | 0        | 0        | 2        |                                                      |     |      |      |     |     |     |           |                   |
| C*04:186                                                 | 04:186              | HLA12702  |                                               | 0        | 0        | 1        | 0        | 0        | 0        | 1        | 2        |                                                      |     |      |      |     |     |     |           |                   |
| C*04:188                                                 | 04:188              | HLA12714  |                                               | 0        | 1        | 1        | 1        | 0        | 0        | 0        | 3        |                                                      |     |      |      |     |     |     |           |                   |
| C*04:191N                                                | 04:191N             | HLA12728  |                                               | 0        | 0        | 1        | 0        | 0        | 0        | 0        | 1        |                                                      |     |      |      |     |     |     |           |                   |
| C*04:193                                                 | 04:193              | HLA12791  |                                               | 0        | 0        | 0        | 0        | 2        | 0        | 0        | 2        |                                                      |     |      |      |     |     |     |           |                   |
| C*04:194                                                 | 04:194              | HLA12792  |                                               | 1        | 1        | 0        | 0        | 0        | 1        | 0        | 3        |                                                      |     |      |      |     |     |     |           |                   |
| C*04:197                                                 | 04:197              | HLA13268  |                                               | 0        | 0        | 0        | 0        | 1        | 0        | 0        | 1        |                                                      |     |      |      |     |     |     |           |                   |
| C*04:200                                                 | 04:200              | HLA13426  |                                               | 0        | 0        | 0        | 0        | 1        | 0        | 0        | 1        |                                                      |     |      |      |     |     |     |           |                   |
| C*04:202                                                 | 04:202              | HLA13672  |                                               | 1        | 0        | 0        | 0        | 0        | 0        | 0        | 1        |                                                      |     |      |      |     |     |     |           |                   |
| C*04:204                                                 | 04:204              | HLA13674  |                                               | 0        | 6        | 0        | 0        | 0        | 0        | 0        | 6        |                                                      | WD  |      |      |     |     |     | WD        | WD                |
| C*04:205N                                                | 04:205N             | HLA13675  |                                               | 0        | 1        | 0        | 0        | 0        | 0        | 0        | 1        |                                                      |     |      |      |     |     |     |           |                   |
| C*04:206                                                 | 04:206              | HLA13676  |                                               | 0        | 0        | 3        | 0        | 0        | 0        | 0        | 3        |                                                      |     |      |      |     |     |     |           |                   |
| C*04:207                                                 | 04:207              | HLA13805  |                                               | 0        | 9        | 0        | 0        | 0        | 0        | 0        | 9        |                                                      | WD  |      |      |     |     |     | WD        | WD                |
| C*04:209                                                 | 04:209              | HLA13808  |                                               | 0        | 1        | 4        | 0        | 0        | 0        | 3        | 8        |                                                      |     |      |      |     |     |     | WD        | WD                |
| C*04:210                                                 | 04:210              | HLA13878  |                                               | 0        | 1        | 0        | 0        | 0        | 0        | 0        | 1        |                                                      |     |      |      |     |     |     |           |                   |
| C*04:213                                                 | 04:213              | HLA14031  |                                               | 0        | 2        | 0        | 0        | 0        | 0        | 0        | 2        |                                                      |     |      |      |     |     |     |           |                   |
| C*04:214                                                 | 04:214              | HLA14032  |                                               | 0        | 2        | 0        | 0        | 0        | 0        | 0        | 2        |                                                      |     |      |      |     |     |     |           |                   |
| C*04:215N                                                | 04:215N             | HLA14033  |                                               | 0        | 1        | 0        | 0        | 0        | 0        | 0        | 1        |                                                      |     |      |      |     |     |     |           |                   |
| C*04:217N                                                | 04:217N             | HLA14110  |                                               | 0        | 0        | 1        | 2        | 0        | 0        | 0        | 3        |                                                      |     |      |      |     |     |     |           |                   |
| C*04:218                                                 | 04:218              | HLA14263  |                                               | 0        | 0        | 3        | 0        | 0        | 0        | 2        | 5        |                                                      |     |      |      |     |     |     | WD        | WD                |
| C*04:221                                                 | 04:221              | HLA14340  |                                               | 0        | 0        | 1        | 0        | 0        | 0        | 0        | 1        |                                                      |     |      |      |     |     |     |           |                   |
| C*04:236N                                                | 04:236N             | HLA15144  |                                               | 0        | 0        | 3        | 0        | 0        | 0        | 0        | 3        |                                                      |     |      |      |     |     |     |           |                   |
| C*04:239                                                 | 04:239              | HLA14997  |                                               | 0        | 0        | 1        | 0        | 0        | 0        | 1        | 2        |                                                      |     |      |      |     |     |     |           |                   |

| Supplemental Table 10: HLA-C Allele Summary <sup>a</sup> |                        |           | Allele Count by Population Group <sup>b</sup> |             |             |               |             |              |             |              |               | 3.0.0 CIWD Category by Population Group <sup>c</sup> |          |          |          |          |          |          |          |                   |
|----------------------------------------------------------|------------------------|-----------|-----------------------------------------------|-------------|-------------|---------------|-------------|--------------|-------------|--------------|---------------|------------------------------------------------------|----------|----------|----------|----------|----------|----------|----------|-------------------|
| Allele                                                   | Genomic typing         | Allele ID | G group                                       | AFA         | API         | EURO          | MENA        | HIS          | NAM         | UNK          | Total         | AFA                                                  | API      | EURO     | MENA     | HIS      | NAM      | UNK      | Total    | Highest Frequency |
| C*04:261                                                 | 04:261                 | HLA16556  |                                               | 0           | 1           | 0             | 0           | 0            | 0           | 0            | 1             |                                                      |          |          |          |          |          |          |          |                   |
| C*04:CODE                                                | 04:CODE                |           |                                               | 8314        | 7020        | 143648        | 3862        | 13268        | 1500        | 22400        | 200012        | NA                                                   | NA       | NA       | NA       | NA       | NA       | NA       | NA       | NA                |
| <b>C*05:01 total</b>                                     | <b>05:01 total</b>     |           |                                               | <b>9321</b> | <b>9180</b> | <b>756088</b> | <b>9233</b> | <b>30844</b> | <b>2799</b> | <b>74466</b> | <b>891931</b> | <b>C</b>                                             | <b>C</b> | <b>C</b> | <b>C</b> | <b>C</b> | <b>C</b> | <b>C</b> | <b>C</b> | <b>C</b>          |
| C*05:01                                                  | 05:01                  |           |                                               | 1           | 2           | 2907          | 5           | 15           | 1           | 149          | 3080          |                                                      |          | C        | WD       | I        |          | C        | C        | C                 |
| C*05:01P                                                 | 05:01P                 |           |                                               | 0           | 4           | 743           | 4           | 2            | 0           | 4            | 757           |                                                      |          | I        |          |          |          |          | I        | I                 |
| <b>C*05:01:01G total</b>                                 | <b>05:01:01G total</b> |           |                                               | <b>9314</b> | <b>9174</b> | <b>752088</b> | <b>9223</b> | <b>30815</b> | <b>2795</b> | <b>74258</b> | <b>887667</b> | <b>C</b>                                             | <b>C</b> | <b>C</b> | <b>C</b> | <b>C</b> | <b>C</b> | <b>C</b> | <b>C</b> | <b>C</b>          |
| C*05:01:01G                                              | 05:01:01G              |           | 05:01:01G                                     | 7134        | 8330        | 703068        | 8970        | 21361        | 2058        | 66569        | 817490        | C                                                    | C        | C        | C        | C        | C        | C        | C        | C                 |
| C*05:01:01                                               | 05:01:01               |           | 05:01:01G                                     | 947         | 338         | 21018         | 124         | 3984         | 284         | 3743         | 30438         | C                                                    | C        | C        | C        | C        | C        | C        | C        | C                 |
| C*05:01:01:01                                            | 05:01:01:01            | HLA00427  | 05:01:01G                                     | 271         | 25          | 3657          | 22          | 1865         | 133         | 643          | 6616          | C                                                    | I        | C        | WD       | C        | C        | C        | C        | C                 |
| C*05:01:01:02                                            | 05:01:01:02            | HLA03586  | 05:01:01G                                     | 958         | 479         | 24158         | 100         | 3555         | 319         | 3265         | 32834         | C                                                    | C        | C        | C        | C        | C        | C        | C        | C                 |
| C*05:01:01:04                                            | 05:01:01:04            | HLA15770  | 05:01:01G                                     | 0           | 0           | 1             | 0           | 0            | 0           | 0            | 1             |                                                      |          |          |          |          |          |          |          |                   |
| C*05:01:01:05                                            | 05:01:01:05            | HLA15772  | 05:01:01G                                     | 0           | 0           | 1             | 0           | 1            | 0           | 1            | 3             |                                                      |          |          |          |          |          |          |          |                   |
| C*05:01:01:08                                            | 05:01:01:08            | HLA17049  | 05:01:01G                                     | 0           | 0           | 15            | 0           | 9            | 1           | 3            | 28            |                                                      |          | WD       |          | I        |          |          | WD       | I                 |
| C*05:01:01:09                                            | 05:01:01:09            | HLA17633  | 05:01:01G                                     | 0           | 0           | 0             | 0           | 0            | 0           | 1            | 1             |                                                      |          |          |          |          |          |          |          |                   |
| C*05:01:04                                               | 05:01:04               | HLA03191  | 05:01:01G                                     | 0           | 0           | 1             | 0           | 0            | 0           | 0            | 1             |                                                      |          |          |          |          |          |          |          |                   |
| C*05:01:05                                               | 05:01:05               | HLA03978  | 05:01:01G                                     | 0           | 0           | 85            | 2           | 5            | 0           | 9            | 101           |                                                      |          | WD       |          | WD       |          | WD       | WD       | WD                |
| C*05:01:15                                               | 05:01:15               | HLA05880  | 05:01:01G                                     | 0           | 2           | 4             | 2           | 1            | 0           | 1            | 10            |                                                      |          |          |          |          |          |          | WD       | WD                |
| C*05:03                                                  | 05:03                  | HLA01169  | 05:01:01G                                     | 0           | 0           | 4             | 0           | 0            | 0           | 0            | 4             |                                                      |          |          |          |          |          |          |          |                   |
| C*05:37                                                  | 05:37                  | HLA04856  | 05:01:01G                                     | 2           | 0           | 55            | 3           | 34           | 0           | 18           | 112           |                                                      |          | WD       |          | I        |          | I        | WD       | I                 |
| C*05:53                                                  | 05:53                  | HLA06125  | 05:01:01G                                     | 1           | 0           | 14            | 0           | 0            | 0           | 2            | 17            |                                                      |          | WD       |          |          |          |          | WD       | WD                |
| C*05:93                                                  | 05:93                  | HLA09646  | 05:01:01G                                     | 0           | 0           | 1             | 0           | 0            | 0           | 0            | 1             |                                                      |          |          |          |          |          |          |          |                   |
| C*05:108                                                 | 05:108                 | HLA12591  | 05:01:01G                                     | 1           | 0           | 6             | 0           | 0            | 0           | 3            | 10            |                                                      |          | WD       |          |          |          |          | WD       | WD                |
| C*05:01:02                                               | 05:01:02               | HLA01998  |                                               | 0           | 0           | 81            | 0           | 3            | 0           | 12           | 96            |                                                      |          | WD       |          |          |          | WD       | WD       | WD                |
| C*05:01:03                                               | 05:01:03               | HLA02292  |                                               | 4           | 0           | 29            | 0           | 3            | 0           | 7            | 43            |                                                      |          | WD       |          |          |          | WD       | WD       | WD                |
| C*05:01:07                                               | 05:01:07               | HLA04293  |                                               | 0           | 0           | 12            | 0           | 1            | 0           | 1            | 14            |                                                      |          | WD       |          |          |          |          | WD       | WD                |
| C*05:01:08                                               | 05:01:08               | HLA04296  |                                               | 0           | 0           | 105           | 1           | 0            | 1           | 16           | 123           |                                                      |          | WD       |          |          |          | I        | WD       | I                 |
| C*05:01:09                                               | 05:01:09               | HLA04305  |                                               | 0           | 0           | 1             | 0           | 0            | 0           | 0            | 1             |                                                      |          |          |          |          |          |          |          |                   |
| C*05:01:11                                               | 05:01:11               | HLA04391  |                                               | 2           | 0           | 62            | 0           | 2            | 1           | 7            | 74            |                                                      |          | WD       |          |          |          | WD       | WD       | WD                |
| C*05:01:12                                               | 05:01:12               | HLA04798  |                                               | 0           | 0           | 3             | 0           | 0            | 0           | 1            | 4             |                                                      |          |          |          |          |          |          |          |                   |
| C*05:01:16                                               | 05:01:16               | HLA06411  |                                               | 0           | 0           | 26            | 0           | 0            | 0           | 10           | 36            |                                                      |          | WD       |          |          |          | WD       | WD       | WD                |
| C*05:01:17                                               | 05:01:17               | HLA07011  |                                               | 0           | 0           | 1             | 0           | 3            | 1           | 0            | 5             |                                                      |          |          |          |          |          |          | WD       | WD                |



| Supplemental Table 10: HLA-C Allele Summary <sup>a</sup> |                    |           | Allele Count by Population Group <sup>b</sup> |          |          |            |           |            |           |            |            |           | 3.0.0 CIWD Category by Population Group <sup>c</sup> |           |           |           |          |           |           |                   |
|----------------------------------------------------------|--------------------|-----------|-----------------------------------------------|----------|----------|------------|-----------|------------|-----------|------------|------------|-----------|------------------------------------------------------|-----------|-----------|-----------|----------|-----------|-----------|-------------------|
| Allele                                                   | Genomic typing     | Allele ID | G group                                       | AFA      | API      | EURO       | MENA      | HIS        | NAM       | UNK        | Total      | AFA       | API                                                  | EURO      | MENA      | HIS       | NAM      | UNK       | Total     | Highest Frequency |
| C*05:01:19                                               | 05:01:19           | HLA07976  |                                               | 0        | 0        | 2          | 0         | 0          | 0         | 0          | 2          |           |                                                      |           |           |           |          |           |           |                   |
| C*05:01:20                                               | 05:01:20           | HLA07979  |                                               | 0        | 0        | 8          | 0         | 0          | 0         | 0          | 8          |           |                                                      | WD        |           |           |          |           | WD        | WD                |
| C*05:01:21                                               | 05:01:21           | HLA08156  |                                               | 0        | 0        | 1          | 0         | 0          | 0         | 1          | 2          |           |                                                      |           |           |           |          |           |           |                   |
| C*05:01:22                                               | 05:01:22           | HLA08475  |                                               | 0        | 0        | 1          | 0         | 0          | 0         | 0          | 1          |           |                                                      |           |           |           |          |           |           |                   |
| C*05:01:23                                               | 05:01:23           | HLA08532  |                                               | 0        | 0        | 1          | 0         | 0          | 0         | 0          | 1          |           |                                                      |           |           |           |          |           |           |                   |
| C*05:01:24                                               | 05:01:24           | HLA08730  |                                               | 0        | 0        | 9          | 0         | 0          | 0         | 0          | 9          |           |                                                      | WD        |           |           |          |           | WD        | WD                |
| C*05:01:27                                               | 05:01:27           | HLA09609  |                                               | 0        | 0        | 5          | 0         | 0          | 0         | 0          | 5          |           |                                                      | WD        |           |           |          |           | WD        | WD                |
| C*05:01:28                                               | 05:01:28           | HLA12187  |                                               | 0        | 0        | 2          | 0         | 0          | 0         | 0          | 2          |           |                                                      |           |           |           |          |           |           |                   |
| C*05:01:30                                               | 05:01:30           | HLA12332  |                                               | 0        | 0        | 1          | 0         | 0          | 0         | 0          | 1          |           |                                                      |           |           |           |          |           |           |                   |
| <b>C*05:04 total</b>                                     | <b>05:04 total</b> |           |                                               | <b>0</b> | <b>0</b> | <b>16</b>  | <b>0</b>  | <b>34</b>  | <b>0</b>  | <b>11</b>  | <b>61</b>  |           |                                                      | <b>WD</b> |           | <b>I</b>  |          | <b>WD</b> | <b>WD</b> | <b>I</b>          |
| C*05:04                                                  | 05:04              |           |                                               | 0        | 0        | 4          | 0         | 13         | 0         | 3          | 20         |           |                                                      |           |           | I         |          |           | WD        | I                 |
| C*05:04:01                                               | 05:04:01           | HLA01174  |                                               | 0        | 0        | 8          | 0         | 21         | 0         | 8          | 37         |           |                                                      | WD        |           | I         |          | WD        | WD        | I                 |
| C*05:04:02                                               | 05:04:02           | HLA08736  |                                               | 0        | 0        | 4          | 0         | 0          | 0         | 0          | 4          |           |                                                      |           |           |           |          |           |           |                   |
| <b>C*05:05 total</b>                                     | <b>05:05 total</b> |           |                                               | <b>4</b> | <b>1</b> | <b>376</b> | <b>1</b>  | <b>5</b>   | <b>0</b>  | <b>45</b>  | <b>432</b> |           |                                                      | <b>I</b>  |           | <b>WD</b> |          | <b>I</b>  | <b>I</b>  | <b>I</b>          |
| C*05:05                                                  | 05:05              |           |                                               | 4        | 1        | 336        | 1         | 5          | 0         | 44         | 391        |           |                                                      | I         |           | WD        |          | I         | I         | I                 |
| C*05:05:01                                               | 05:05:01           | HLA01602  |                                               | 0        | 0        | 40         | 0         | 0          | 0         | 1          | 41         |           |                                                      | WD        |           |           |          |           | WD        | WD                |
| C*05:06                                                  | 05:06              | HLA01661  |                                               | 0        | 0        | 24         | 0         | 1          | 0         | 1          | 26         |           |                                                      | WD        |           |           |          |           | WD        | WD                |
| C*05:07N                                                 | 05:07N             | HLA01832  |                                               | 3        | 3        | 331        | 2         | 8          | 1         | 34         | 382        |           |                                                      | I         |           | I         |          | I         | I         | I                 |
| C*05:08                                                  | 05:08              | HLA01843  |                                               | 0        | 0        | 455        | 0         | 7          | 2         | 22         | 486        |           |                                                      | I         |           | I         |          | I         | I         | I                 |
| <b>C*05:09 total</b>                                     | <b>05:09 total</b> |           |                                               | <b>8</b> | <b>2</b> | <b>251</b> | <b>2</b>  | <b>386</b> | <b>31</b> | <b>138</b> | <b>818</b> | <b>WD</b> |                                                      | <b>I</b>  |           | <b>C</b>  | <b>C</b> | <b>C</b>  | <b>I</b>  | <b>C</b>          |
| C*05:09                                                  | 05:09              |           |                                               | 0        | 1        | 45         | 0         | 60         | 5         | 5          | 116        |           |                                                      | WD        |           | I         | WD       | WD        | WD        | I                 |
| C*05:09:01                                               | 05:09:01           | HLA01856  |                                               | 8        | 1        | 205        | 2         | 326        | 26        | 132        | 700        | WD        |                                                      | I         |           | C         | C        | C         | I         | C                 |
| C*05:09:03                                               | 05:09:03           | HLA12042  |                                               | 0        | 0        | 1          | 0         | 0          | 0         | 1          | 2          |           |                                                      |           |           |           |          |           |           |                   |
| C*05:10                                                  | 05:10              | HLA01907  |                                               | 1        | 0        | 48         | 0         | 1          | 0         | 8          | 58         |           |                                                      | WD        |           |           |          | WD        | WD        | WD                |
| C*05:11                                                  | 05:11              | HLA02148  |                                               | 7        | 0        | 28         | 1         | 1          | 0         | 7          | 44         | WD        |                                                      | WD        |           |           |          | WD        | WD        | WD                |
| C*05:13                                                  | 05:13              | HLA02408  |                                               | 0        | 1        | 108        | 1         | 1          | 0         | 2          | 113        |           |                                                      | WD        |           |           |          |           | WD        | WD                |
| C*05:14                                                  | 05:14              | HLA02586  |                                               | 0        | 0        | 46         | 0         | 1          | 0         | 14         | 61         |           |                                                      | WD        |           |           |          | I         | WD        | I                 |
| C*05:15                                                  | 05:15              | HLA02753  |                                               | 0        | 0        | 20         | 0         | 0          | 0         | 1          | 21         |           |                                                      | WD        |           |           |          |           | WD        | WD                |
| C*05:16                                                  | 05:16              | HLA02785  |                                               | 0        | 0        | 71         | 0         | 0          | 0         | 2          | 73         |           |                                                      | WD        |           |           |          |           | WD        | WD                |
| C*05:17                                                  | 05:17              | HLA02979  |                                               | 0        | 0        | 1          | 0         | 0          | 0         | 0          | 1          |           |                                                      |           |           |           |          |           |           |                   |
| <b>C*05:18 total</b>                                     | <b>05:18 total</b> |           |                                               | <b>0</b> | <b>0</b> | <b>18</b>  | <b>20</b> | <b>0</b>   | <b>0</b>  | <b>3</b>   | <b>41</b>  |           |                                                      | <b>WD</b> | <b>WD</b> |           |          |           | <b>WD</b> | <b>WD</b>         |

| Supplemental Table 10: HLA-C Allele Summary <sup>a</sup> |                    |           | Allele Count by Population Group <sup>b</sup> |          |          |           |          |          |          |          |           | 3.0.0 CIWD Category by Population Group <sup>c</sup> |     |           |      |     |     |           |           |                   |
|----------------------------------------------------------|--------------------|-----------|-----------------------------------------------|----------|----------|-----------|----------|----------|----------|----------|-----------|------------------------------------------------------|-----|-----------|------|-----|-----|-----------|-----------|-------------------|
| Allele                                                   | Genomic typing     | Allele ID | G group                                       | AFA      | API      | EURO      | MENA     | HIS      | NAM      | UNK      | Total     | AFA                                                  | API | EURO      | MENA | HIS | NAM | UNK       | Total     | Highest Frequency |
| C*05:18                                                  | 05:18              |           |                                               | 0        | 0        | 4         | 4        | 0        | 0        | 0        | 8         |                                                      |     |           |      |     |     |           | WD        | WD                |
| C*05:18:01                                               | 05:18:01           | HLA03212  |                                               | 0        | 0        | 12        | 16       | 0        | 0        | 3        | 31        |                                                      |     | WD        | WD   |     |     |           | WD        | WD                |
| C*05:18:03                                               | 05:18:03           | HLA07031  |                                               | 0        | 0        | 2         | 0        | 0        | 0        | 0        | 2         |                                                      |     |           |      |     |     |           |           |                   |
| C*05:19                                                  | 05:19              | HLA03219  |                                               | 0        | 0        | 14        | 0        | 0        | 0        | 1        | 15        |                                                      |     | WD        |      |     |     |           | WD        | WD                |
| C*05:20                                                  | 05:20              | HLA03438  |                                               | 0        | 0        | 1         | 0        | 0        | 0        | 1        | 2         |                                                      |     |           |      |     |     |           |           |                   |
| C*05:21                                                  | 05:21              | HLA03517  |                                               | 0        | 0        | 1         | 0        | 0        | 0        | 0        | 1         |                                                      |     |           |      |     |     |           |           |                   |
| <b>C*05:22 total</b>                                     | <b>05:22 total</b> |           |                                               | <b>1</b> | <b>0</b> | <b>58</b> | <b>0</b> | <b>0</b> | <b>0</b> | <b>0</b> | <b>59</b> |                                                      |     | <b>WD</b> |      |     |     |           | <b>WD</b> | <b>WD</b>         |
| C*05:22                                                  | 05:22              |           |                                               | 1        | 0        | 6         | 0        | 0        | 0        | 0        | 7         |                                                      |     | WD        |      |     |     |           | WD        | WD                |
| C*05:22:01                                               | 05:22:01           | HLA03531  |                                               | 0        | 0        | 17        | 0        | 0        | 0        | 0        | 17        |                                                      |     | WD        |      |     |     |           | WD        | WD                |
| C*05:22:02                                               | 05:22:02           | HLA07225  |                                               | 0        | 0        | 35        | 0        | 0        | 0        | 0        | 35        |                                                      |     | WD        |      |     |     |           | WD        | WD                |
| C*05:24                                                  | 05:24              | HLA03634  |                                               | 0        | 0        | 5         | 0        | 0        | 0        | 0        | 5         |                                                      |     | WD        |      |     |     |           | WD        | WD                |
| C*05:25                                                  | 05:25              | HLA03681  |                                               | 0        | 0        | 1         | 0        | 0        | 0        | 1        | 2         |                                                      |     |           |      |     |     |           |           |                   |
| C*05:26                                                  | 05:26              | HLA04297  |                                               | 0        | 0        | 6         | 16       | 0        | 0        | 0        | 22        |                                                      |     | WD        | WD   |     |     |           | WD        | WD                |
| C*05:27                                                  | 05:27              | HLA04302  |                                               | 0        | 0        | 8         | 0        | 0        | 0        | 0        | 8         |                                                      |     | WD        |      |     |     |           | WD        | WD                |
| C*05:28                                                  | 05:28              | HLA04304  |                                               | 0        | 0        | 22        | 0        | 0        | 0        | 0        | 22        |                                                      |     | WD        |      |     |     |           | WD        | WD                |
| <b>C*05:29 total</b>                                     | <b>05:29 total</b> |           |                                               | <b>0</b> | <b>1</b> | <b>33</b> | <b>2</b> | <b>4</b> | <b>0</b> | <b>5</b> | <b>45</b> |                                                      |     | <b>WD</b> |      |     |     | <b>WD</b> | <b>WD</b> | <b>WD</b>         |
| C*05:29                                                  | 05:29              |           |                                               | 0        | 0        | 8         | 2        | 2        | 0        | 1        | 13        |                                                      |     | WD        |      |     |     |           | WD        | WD                |
| C*05:29:01                                               | 05:29:01           | HLA04308  |                                               | 0        | 1        | 25        | 0        | 2        | 0        | 4        | 32        |                                                      |     | WD        |      |     |     |           | WD        | WD                |
| C*05:30                                                  | 05:30              | HLA04310  |                                               | 0        | 0        | 1         | 0        | 0        | 0        | 0        | 1         |                                                      |     |           |      |     |     |           |           |                   |
| C*05:32                                                  | 05:32              | HLA04587  |                                               | 1        | 0        | 45        | 2        | 0        | 0        | 2        | 50        |                                                      |     | WD        |      |     |     |           | WD        | WD                |
| C*05:33                                                  | 05:33              | HLA04596  |                                               | 0        | 0        | 9         | 0        | 0        | 0        | 0        | 9         |                                                      |     | WD        |      |     |     |           | WD        | WD                |
| C*05:34                                                  | 05:34              | HLA04608  |                                               | 0        | 0        | 52        | 0        | 0        | 0        | 1        | 53        |                                                      |     | WD        |      |     |     |           | WD        | WD                |
| C*05:35                                                  | 05:35              | HLA04677  |                                               | 0        | 0        | 8         | 0        | 0        | 0        | 3        | 11        |                                                      |     | WD        |      |     |     |           | WD        | WD                |
| C*05:36                                                  | 05:36              | HLA04701  |                                               | 1        | 0        | 34        | 0        | 0        | 0        | 5        | 40        |                                                      |     | WD        |      |     |     | WD        | WD        | WD                |
| C*05:38                                                  | 05:38              | HLA04799  |                                               | 0        | 0        | 3         | 0        | 0        | 0        | 0        | 3         |                                                      |     |           |      |     |     |           |           |                   |
| C*05:39                                                  | 05:39              | HLA04801  |                                               | 0        | 0        | 35        | 0        | 0        | 0        | 2        | 37        |                                                      |     | WD        |      |     |     |           | WD        | WD                |
| C*05:41                                                  | 05:41              | HLA04803  |                                               | 0        | 0        | 1         | 0        | 0        | 0        | 0        | 1         |                                                      |     |           |      |     |     |           |           |                   |
| C*05:42                                                  | 05:42              | HLA04832  |                                               | 0        | 0        | 1         | 0        | 0        | 0        | 0        | 1         |                                                      |     |           |      |     |     |           |           |                   |
| C*05:43                                                  | 05:43              | HLA05213  |                                               | 0        | 0        | 6         | 0        | 1        | 0        | 0        | 7         |                                                      |     | WD        |      |     |     |           | WD        | WD                |
| <b>C*05:44 total</b>                                     | <b>05:44 total</b> |           |                                               | <b>0</b> | <b>0</b> | <b>7</b>  | <b>0</b> | <b>0</b> | <b>0</b> | <b>1</b> | <b>8</b>  |                                                      |     | <b>WD</b> |      |     |     |           | <b>WD</b> | <b>WD</b>         |
| C*05:44:01                                               | 05:44:01           | HLA05310  |                                               | 0        | 0        | 3         | 0        | 0        | 0        | 0        | 3         |                                                      |     |           |      |     |     |           |           |                   |

| Supplemental Table 10: HLA-C Allele Summary <sup>a</sup> |                    |           | Allele Count by Population Group <sup>b</sup> |          |          |          |          |          |          |          |          |     | 3.0.0 CIWD Category by Population Group <sup>c</sup> |      |      |     |     |     |       |                   |
|----------------------------------------------------------|--------------------|-----------|-----------------------------------------------|----------|----------|----------|----------|----------|----------|----------|----------|-----|------------------------------------------------------|------|------|-----|-----|-----|-------|-------------------|
| Allele                                                   | Genomic typing     | Allele ID | G group                                       | AFA      | API      | EURO     | MENA     | HIS      | NAM      | UNK      | Total    | AFA | API                                                  | EURO | MENA | HIS | NAM | UNK | Total | Highest Frequency |
| C*05:44:02                                               | 05:44:02           | HLA08199  |                                               | 0        | 0        | 4        | 0        | 0        | 0        | 1        | 5        |     |                                                      |      |      |     |     |     | WD    | WD                |
| C*05:46                                                  | 05:46              | HLA05571  |                                               | 0        | 0        | 17       | 0        | 0        | 0        | 0        | 17       |     |                                                      | WD   |      |     |     |     | WD    | WD                |
| C*05:47                                                  | 05:47              | HLA05585  |                                               | 0        | 0        | 16       | 0        | 0        | 0        | 0        | 16       |     |                                                      | WD   |      |     |     |     | WD    | WD                |
| C*05:49                                                  | 05:49              | HLA05593  |                                               | 0        | 0        | 1        | 0        | 0        | 0        | 0        | 1        |     |                                                      |      |      |     |     |     |       |                   |
| C*05:51Q                                                 | 05:51Q             | HLA05852  |                                               | 0        | 0        | 6        | 0        | 0        | 0        | 1        | 7        |     |                                                      | WD   |      |     |     |     | WD    | WD                |
| C*05:52                                                  | 05:52              | HLA06054  |                                               | 0        | 0        | 3        | 0        | 0        | 0        | 0        | 3        |     |                                                      |      |      |     |     |     |       |                   |
| C*05:55                                                  | 05:55              | HLA06383  |                                               | 0        | 0        | 13       | 0        | 0        | 0        | 3        | 16       |     |                                                      | WD   |      |     |     |     | WD    | WD                |
| <b>C*05:58 total</b>                                     | <b>05:58 total</b> |           |                                               | <b>0</b> | <b>0</b> | <b>1</b> | <b>0</b> | <b>0</b> | <b>0</b> | <b>0</b> | <b>1</b> |     |                                                      |      |      |     |     |     |       |                   |
| C*05:58:02                                               | 05:58:02           | HLA07222  |                                               | 0        | 0        | 1        | 0        | 0        | 0        | 0        | 1        |     |                                                      |      |      |     |     |     |       |                   |
| C*05:59                                                  | 05:59              | HLA06720  |                                               | 0        | 0        | 1        | 0        | 0        | 0        | 0        | 1        |     |                                                      |      |      |     |     |     |       |                   |
| C*05:60                                                  | 05:60              | HLA07052  |                                               | 0        | 0        | 4        | 0        | 0        | 0        | 0        | 4        |     |                                                      |      |      |     |     |     |       |                   |
| C*05:61                                                  | 05:61              | HLA07063  |                                               | 0        | 1        | 0        | 0        | 0        | 0        | 0        | 1        |     |                                                      |      |      |     |     |     |       |                   |
| C*05:63                                                  | 05:63              | HLA07082  |                                               | 0        | 0        | 2        | 0        | 0        | 0        | 0        | 2        |     |                                                      |      |      |     |     |     |       |                   |
| <b>C*05:64 total</b>                                     | <b>05:64 total</b> |           |                                               | <b>0</b> | <b>0</b> | <b>2</b> | <b>0</b> | <b>0</b> | <b>0</b> | <b>0</b> | <b>2</b> |     |                                                      |      |      |     |     |     |       |                   |
| C*05:64                                                  | 05:64              |           |                                               | 0        | 0        | 1        | 0        | 0        | 0        | 0        | 1        |     |                                                      |      |      |     |     |     |       |                   |
| C*05:64:02                                               | 05:64:02           | HLA09191  |                                               | 0        | 0        | 1        | 0        | 0        | 0        | 0        | 1        |     |                                                      |      |      |     |     |     |       |                   |
| C*05:65                                                  | 05:65              | HLA07109  |                                               | 0        | 0        | 12       | 0        | 0        | 1        | 1        | 14       |     |                                                      | WD   |      |     |     |     | WD    | WD                |
| C*05:67                                                  | 05:67              | HLA07134  |                                               | 0        | 0        | 9        | 0        | 0        | 0        | 0        | 9        |     |                                                      | WD   |      |     |     |     | WD    | WD                |
| C*05:68                                                  | 05:68              | HLA07135  |                                               | 0        | 0        | 1        | 0        | 0        | 0        | 0        | 1        |     |                                                      |      |      |     |     |     |       |                   |
| C*05:74                                                  | 05:74              | HLA07488  |                                               | 0        | 0        | 1        | 0        | 0        | 0        | 1        | 2        |     |                                                      |      |      |     |     |     |       |                   |
| C*05:75                                                  | 05:75              | HLA07977  |                                               | 0        | 0        | 1        | 0        | 0        | 0        | 0        | 1        |     |                                                      |      |      |     |     |     |       |                   |
| C*05:76                                                  | 05:76              | HLA07978  |                                               | 0        | 0        | 1        | 0        | 0        | 0        | 0        | 1        |     |                                                      |      |      |     |     |     |       |                   |
| C*05:77                                                  | 05:77              | HLA07980  |                                               | 0        | 0        | 6        | 0        | 0        | 0        | 1        | 7        |     |                                                      | WD   |      |     |     |     | WD    | WD                |
| C*05:80                                                  | 05:80              | HLA08198  |                                               | 0        | 0        | 24       | 0        | 0        | 0        | 0        | 24       |     |                                                      | WD   |      |     |     |     | WD    | WD                |
| C*05:81                                                  | 05:81              | HLA08200  |                                               | 0        | 0        | 2        | 0        | 0        | 0        | 0        | 2        |     |                                                      |      |      |     |     |     |       |                   |
| C*05:82                                                  | 05:82              | HLA08733  |                                               | 0        | 0        | 2        | 0        | 0        | 0        | 0        | 2        |     |                                                      |      |      |     |     |     |       |                   |
| C*05:84                                                  | 05:84              | HLA08735  |                                               | 0        | 0        | 0        | 0        | 0        | 0        | 1        | 1        |     |                                                      |      |      |     |     |     |       |                   |
| C*05:87                                                  | 05:87              | HLA09025  |                                               | 0        | 0        | 1        | 0        | 0        | 0        | 0        | 1        |     |                                                      |      |      |     |     |     |       |                   |
| C*05:89                                                  | 05:89              | HLA09189  |                                               | 0        | 0        | 3        | 0        | 0        | 0        | 0        | 3        |     |                                                      |      |      |     |     |     |       |                   |
| C*05:91N                                                 | 05:91N             | HLA09192  |                                               | 0        | 0        | 1        | 0        | 0        | 0        | 0        | 1        |     |                                                      |      |      |     |     |     |       |                   |
| C*05:97                                                  | 05:97              | HLA10079  |                                               | 0        | 0        | 5        | 0        | 0        | 0        | 0        | 5        |     |                                                      | WD   |      |     |     |     | WD    | WD                |

| Supplemental Table 10: HLA-C Allele Summary <sup>a</sup> |                        |           | Allele Count by Population Group <sup>b</sup> |              |               |                |              |              |             |               |                | 3.0.0 CIWD Category by Population Group <sup>c</sup> |          |          |          |          |          |          |          |                   |
|----------------------------------------------------------|------------------------|-----------|-----------------------------------------------|--------------|---------------|----------------|--------------|--------------|-------------|---------------|----------------|------------------------------------------------------|----------|----------|----------|----------|----------|----------|----------|-------------------|
| Allele                                                   | Genomic typing         | Allele ID | G group                                       | AFA          | API           | EURO           | MENA         | HIS          | NAM         | UNK           | Total          | AFA                                                  | API      | EURO     | MENA     | HIS      | NAM      | UNK      | Total    | Highest Frequency |
| C*05:98                                                  | 05:98                  | HLA10437  |                                               | 0            | 0             | 6              | 0            | 0            | 0           | 0             | 6              |                                                      |          | WD       |          |          |          |          | WD       | WD                |
| C*05:99N                                                 | 05:99N                 | HLA10664  |                                               | 0            | 0             | 6              | 0            | 0            | 0           | 1             | 7              |                                                      |          | WD       |          |          |          |          | WD       | WD                |
| C*05:100                                                 | 05:100                 | HLA11093  |                                               | 0            | 0             | 1              | 0            | 0            | 0           | 0             | 1              |                                                      |          |          |          |          |          |          |          |                   |
| <b>C*05:103 total</b>                                    | <b>05:103 total</b>    |           |                                               | <b>1</b>     | <b>0</b>      | <b>0</b>       | <b>0</b>     | <b>0</b>     | <b>0</b>    | <b>0</b>      | <b>1</b>       |                                                      |          |          |          |          |          |          |          |                   |
| C*05:103P                                                | 05:103P                |           |                                               | 1            | 0             | 0              | 0            | 0            | 0           | 0             | 1              |                                                      |          |          |          |          |          |          |          |                   |
| C*05:104                                                 | 05:104                 | HLA12188  |                                               | 0            | 0             | 21             | 0            | 0            | 0           | 0             | 21             |                                                      |          | WD       |          |          |          |          | WD       | WD                |
| C*05:105                                                 | 05:105                 | HLA12405  |                                               | 0            | 0             | 0              | 0            | 0            | 0           | 1             | 1              |                                                      |          |          |          |          |          |          |          |                   |
| C*05:109                                                 | 05:109                 | HLA12706  |                                               | 0            | 0             | 2              | 0            | 0            | 0           | 0             | 2              |                                                      |          |          |          |          |          |          |          |                   |
| C*05:111                                                 | 05:111                 | HLA12726  |                                               | 0            | 0             | 5              | 0            | 0            | 0           | 0             | 5              |                                                      |          | WD       |          |          |          |          | WD       | WD                |
| C*05:113N                                                | 05:113N                | HLA12687  |                                               | 0            | 0             | 0              | 1            | 0            | 0           | 0             | 1              |                                                      |          |          |          |          |          |          |          |                   |
| C*05:116                                                 | 05:116                 | HLA13100  |                                               | 0            | 0             | 1              | 0            | 0            | 0           | 0             | 1              |                                                      |          |          |          |          |          |          |          |                   |
| C*05:118                                                 | 05:118                 | HLA13529  |                                               | 0            | 0             | 1              | 0            | 0            | 0           | 0             | 1              |                                                      |          |          |          |          |          |          |          |                   |
| C*05:120                                                 | 05:120                 | HLA13564  |                                               | 1            | 0             | 0              | 0            | 0            | 0           | 0             | 1              |                                                      |          |          |          |          |          |          |          |                   |
| C*05:121                                                 | 05:121                 | HLA13752  |                                               | 0            | 0             | 0              | 0            | 2            | 0           | 1             | 3              |                                                      |          |          |          |          |          |          |          |                   |
| C*05:122                                                 | 05:122                 | HLA13753  |                                               | 0            | 0             | 0              | 0            | 0            | 0           | 1             | 1              |                                                      |          |          |          |          |          |          |          |                   |
| C*05:128N                                                | 05:128N                | HLA14606  |                                               | 1            | 0             | 0              | 0            | 0            | 0           | 0             | 1              |                                                      |          |          |          |          |          |          |          |                   |
| C*05:131                                                 | 05:131                 | HLA15047  |                                               | 0            | 0             | 1              | 0            | 0            | 0           | 0             | 1              |                                                      |          |          |          |          |          |          |          |                   |
| C*05:132                                                 | 05:132                 | HLA15048  |                                               | 0            | 0             | 2              | 0            | 0            | 0           | 0             | 2              |                                                      |          |          |          |          |          |          |          |                   |
| C*05:CODE                                                | 05:CODE                |           |                                               | 1180         | 382           | 61100          | 496          | 3436         | 364         | 6533          | 73491          | NA                                                   | NA       | NA       | NA       | NA       | NA       | NA       | NA       | NA                |
| <b>C*06:02 total</b>                                     | <b>06:02 total</b>     |           |                                               | <b>29557</b> | <b>122838</b> | <b>1057665</b> | <b>43692</b> | <b>37816</b> | <b>3750</b> | <b>102420</b> | <b>1397738</b> | <b>C</b>                                             | <b>C</b> | <b>C</b> | <b>C</b> | <b>C</b> | <b>C</b> | <b>C</b> | <b>C</b> | <b>C</b>          |
| C*06:02                                                  | 06:02                  |           |                                               | 150          | 121           | 17611          | 503          | 41           | 16          | 1291          | 19733          | C                                                    | I        | C        | C        | I        | C        | C        | C        | C                 |
| C*06:02P                                                 | 06:02P                 |           |                                               | 5            | 36            | 2308           | 321          | 8            | 1           | 1371          | 4050           | WD                                                   | I        | C        | C        | I        |          | C        | C        | C                 |
| <b>C*06:02:01G total</b>                                 | <b>06:02:01G total</b> |           |                                               | <b>29398</b> | <b>122664</b> | <b>1037518</b> | <b>42512</b> | <b>37739</b> | <b>3730</b> | <b>99733</b>  | <b>1373294</b> | <b>C</b>                                             | <b>C</b> | <b>C</b> | <b>C</b> | <b>C</b> | <b>C</b> | <b>C</b> | <b>C</b> | <b>C</b>          |
| C*06:02:01G                                              | 06:02:01G              |           | 06:02:01G                                     | 23890        | 115164        | 992544         | 41530        | 28265        | 2792        | 92646         | 1296831        | C                                                    | C        | C        | C        | C        | C        | C        | C        | C                 |
| C*06:02:01                                               | 06:02:01               |           | 06:02:01G                                     | 1311         | 1887          | 11992          | 241          | 2309         | 211         | 1742          | 19693          | C                                                    | C        | C        | C        | C        | C        | C        | C        | C                 |
| C*06:02:01:01                                            | 06:02:01:01            | HLA00430  | 06:02:01G                                     | 3454         | 5046          | 27453          | 435          | 4755         | 514         | 4267          | 45924          | C                                                    | C        | C        | C        | C        | C        | C        | C        | C                 |
| C*06:02:01:02                                            | 06:02:01:02            | HLA02561  | 06:02:01G                                     | 173          | 531           | 3703           | 282          | 1437         | 132         | 655           | 6913           | C                                                    | C        | C        | C        | C        | C        | C        | C        | C                 |
| C*06:02:01:03                                            | 06:02:01:03            | HLA10027  | 06:02:01G                                     | 556          | 36            | 1806           | 24           | 969          | 79          | 418           | 3888           | C                                                    | I        | C        | WD       | C        | C        | C        | C        | C                 |
| C*06:02:01:08                                            | 06:02:01:08            | HLA17054  | 06:02:01G                                     | 0            | 0             | 16             | 0            | 0            | 0           | 3             | 19             |                                                      |          | WD       |          |          |          |          | WD       | WD                |
| C*06:02:03                                               | 06:02:03               | HLA03018  | 06:02:01G                                     | 13           | 0             | 0              | 0            | 4            | 2           | 2             | 21             | WD                                                   |          |          |          |          |          |          | WD       | WD                |
| C*06:02:29                                               | 06:02:29               | HLA09984  | 06:02:01G                                     | 1            | 0             | 0              | 0            | 0            | 0           | 0             | 1              |                                                      |          |          |          |          |          |          |          |                   |

| Supplemental Table 10: HLA-C Allele Summary <sup>a</sup> |                |           |           | Allele Count by Population Group <sup>b</sup> |     |      |      |     |     |     |       |     | 3.0.0 CIWD Category by Population Group <sup>c</sup> |      |      |     |     |     |       |                   |
|----------------------------------------------------------|----------------|-----------|-----------|-----------------------------------------------|-----|------|------|-----|-----|-----|-------|-----|------------------------------------------------------|------|------|-----|-----|-----|-------|-------------------|
| Allele                                                   | Genomic typing | Allele ID | G group   | AFA                                           | API | EURO | MENA | HIS | NAM | UNK | Total | AFA | API                                                  | EURO | MENA | HIS | NAM | UNK | Total | Highest Frequency |
| C*06:73                                                  | 06:73          | HLA07557  | 06:02:01G | 0                                             | 0   | 1    | 0    | 0   | 0   | 0   | 1     |     |                                                      |      |      |     |     |     |       |                   |
| C*06:146                                                 | 06:146         | HLA12675  | 06:02:01G | 0                                             | 0   | 2    | 0    | 0   | 0   | 0   | 2     |     |                                                      |      |      |     |     |     |       |                   |
| C*06:176                                                 | 06:176         | HLA14894  | 06:02:01G | 0                                             | 0   | 1    | 0    | 0   | 0   | 0   | 1     |     |                                                      |      |      |     |     |     |       |                   |
| C*06:02:04                                               | 06:02:04       | HLA04291  |           | 0                                             | 0   | 4    | 0    | 0   | 0   | 0   | 4     |     |                                                      |      |      |     |     |     |       |                   |
| C*06:02:05                                               | 06:02:05       | HLA04292  |           | 0                                             | 0   | 11   | 0    | 0   | 0   | 0   | 11    |     |                                                      | WD   |      |     |     |     | WD    | WD                |
| C*06:02:06                                               | 06:02:06       | HLA05174  |           | 0                                             | 0   | 34   | 1    | 0   | 0   | 2   | 37    |     |                                                      | WD   |      |     |     |     | WD    | WD                |
| C*06:02:07                                               | 06:02:07       | HLA05176  |           | 0                                             | 0   | 5    | 0    | 25  | 2   | 5   | 37    |     |                                                      | WD   |      | I   |     | WD  | WD    | I                 |
| C*06:02:08                                               | 06:02:08       | HLA05195  |           | 0                                             | 0   | 20   | 0    | 0   | 0   | 5   | 25    |     |                                                      | WD   |      |     |     | WD  | WD    | WD                |
| C*06:02:09                                               | 06:02:09       | HLA05602  |           | 0                                             | 0   | 2    | 0    | 0   | 0   | 0   | 2     |     |                                                      |      |      |     |     |     |       |                   |
| C*06:02:11                                               | 06:02:11       | HLA05783  |           | 0                                             | 0   | 1    | 0    | 0   | 0   | 0   | 1     |     |                                                      |      |      |     |     |     |       |                   |
| C*06:02:12                                               | 06:02:12       | HLA06388  |           | 0                                             | 0   | 49   | 0    | 0   | 0   | 1   | 50    |     |                                                      | WD   |      |     |     |     | WD    | WD                |
| C*06:02:14                                               | 06:02:14       | HLA06442  |           | 0                                             | 0   | 1    | 0    | 0   | 0   | 0   | 1     |     |                                                      |      |      |     |     |     |       |                   |
| C*06:02:15                                               | 06:02:15       | HLA06707  |           | 0                                             | 0   | 2    | 0    | 0   | 0   | 1   | 3     |     |                                                      |      |      |     |     |     |       |                   |
| C*06:02:16                                               | 06:02:16       | HLA06715  |           | 0                                             | 0   | 1    | 0    | 0   | 0   | 1   | 2     |     |                                                      |      |      |     |     |     |       |                   |
| C*06:02:17                                               | 06:02:17       | HLA07066  |           | 0                                             | 0   | 0    | 1    | 0   | 0   | 1   | 2     |     |                                                      |      |      |     |     |     |       |                   |
| C*06:02:18                                               | 06:02:18       | HLA07216  |           | 0                                             | 0   | 8    | 0    | 0   | 0   | 0   | 8     |     |                                                      | WD   |      |     |     |     | WD    | WD                |
| C*06:02:20                                               | 06:02:20       | HLA07832  |           | 0                                             | 0   | 2    | 0    | 2   | 1   | 0   | 5     |     |                                                      |      |      |     |     |     | WD    | WD                |
| C*06:02:22                                               | 06:02:22       | HLA08698  |           | 0                                             | 0   | 6    | 0    | 0   | 0   | 1   | 7     |     |                                                      | WD   |      |     |     |     | WD    | WD                |
| C*06:02:25                                               | 06:02:25       | HLA09016  |           | 0                                             | 0   | 0    | 4    | 0   | 0   | 0   | 4     |     |                                                      |      |      |     |     |     |       |                   |
| C*06:02:26                                               | 06:02:26       | HLA09181  |           | 0                                             | 0   | 3    | 0    | 0   | 0   | 0   | 3     |     |                                                      |      |      |     |     |     |       |                   |
| C*06:02:27                                               | 06:02:27       | HLA09725  |           | 0                                             | 0   | 3    | 0    | 0   | 0   | 0   | 3     |     |                                                      |      |      |     |     |     |       |                   |
| C*06:02:31                                               | 06:02:31       | HLA10057  |           | 2                                             | 0   | 1    | 0    | 0   | 0   | 0   | 3     |     |                                                      |      |      |     |     |     |       |                   |
| C*06:02:33                                               | 06:02:33       | HLA10062  |           | 0                                             | 4   | 4    | 0    | 0   | 0   | 0   | 8     |     |                                                      |      |      |     |     |     | WD    | WD                |
| C*06:02:37                                               | 06:02:37       | HLA11251  |           | 0                                             | 7   | 4    | 0    | 1   | 0   | 0   | 12    |     | WD                                                   |      |      |     |     |     | WD    | WD                |
| C*06:02:38                                               | 06:02:38       | HLA11439  |           | 0                                             | 0   | 2    | 350  | 0   | 0   | 6   | 358   |     |                                                      |      | C    |     |     | WD  | I     | C                 |
| C*06:02:39                                               | 06:02:39       | HLA12136  |           | 1                                             | 0   | 1    | 0    | 0   | 0   | 0   | 2     |     |                                                      |      |      |     |     |     |       |                   |
| C*06:02:40                                               | 06:02:40       | HLA12138  |           | 0                                             | 0   | 4    | 0    | 0   | 0   | 0   | 4     |     |                                                      |      |      |     |     |     |       |                   |
| C*06:02:43                                               | 06:02:43       | HLA12766  |           | 0                                             | 3   | 1    | 0    | 0   | 0   | 0   | 4     |     |                                                      |      |      |     |     |     |       |                   |
| C*06:02:44                                               | 06:02:44       | HLA13408  |           | 0                                             | 0   | 1    | 0    | 0   | 0   | 0   | 1     |     |                                                      |      |      |     |     |     |       |                   |
| C*06:02:45                                               | 06:02:45       | HLA14611  |           | 1                                             | 0   | 0    | 0    | 0   | 0   | 0   | 1     |     |                                                      |      |      |     |     |     |       |                   |
| C*06:02:46                                               | 06:02:46       | HLA15881  |           | 0                                             | 1   | 0    | 0    | 0   | 0   | 0   | 1     |     |                                                      |      |      |     |     |     |       |                   |

| Supplemental Table 10: HLA-C Allele Summary <sup>a</sup> |                    |           | Allele Count by Population Group <sup>b</sup> |          |          |            |          |          |          |          |            |     | 3.0.0 CIWD Category by Population Group <sup>c</sup> |           |      |     |     |           |           |                   |
|----------------------------------------------------------|--------------------|-----------|-----------------------------------------------|----------|----------|------------|----------|----------|----------|----------|------------|-----|------------------------------------------------------|-----------|------|-----|-----|-----------|-----------|-------------------|
| Allele                                                   | Genomic typing     | Allele ID | G group                                       | AFA      | API      | EURO       | MENA     | HIS      | NAM      | UNK      | Total      | AFA | API                                                  | EURO      | MENA | HIS | NAM | UNK       | Total     | Highest Frequency |
| C*06:17                                                  | 06:17              | HLA02641  |                                               | 0        | 2        | 58         | 0        | 0        | 0        | 2        | 62         |     |                                                      | WD        |      |     |     |           | WD        | WD                |
| <b>C*06:03 total</b>                                     | <b>06:03 total</b> |           |                                               | <b>0</b> | <b>2</b> | <b>40</b>  | <b>2</b> | <b>0</b> | <b>0</b> | <b>2</b> | <b>46</b>  |     |                                                      | <b>WD</b> |      |     |     |           | <b>WD</b> | <b>WD</b>         |
| C*06:03                                                  | 06:03              |           |                                               | 0        | 0        | 24         | 0        | 0        | 0        | 0        | 24         |     |                                                      | WD        |      |     |     |           | WD        | WD                |
| C*06:03:01                                               | 06:03:01           | HLA00431  |                                               | 0        | 0        | 8          | 2        | 0        | 0        | 1        | 11         |     |                                                      | WD        |      |     |     |           | WD        | WD                |
| C*06:03:02                                               | 06:03:02           | HLA07492  |                                               | 0        | 2        | 8          | 0        | 0        | 0        | 1        | 11         |     |                                                      | WD        |      |     |     |           | WD        | WD                |
| <b>C*06:04 total</b>                                     | <b>06:04 total</b> |           |                                               | <b>0</b> | <b>1</b> | <b>333</b> | <b>2</b> | <b>2</b> | <b>1</b> | <b>7</b> | <b>346</b> |     |                                                      | <b>I</b>  |      |     |     | <b>WD</b> | <b>I</b>  | <b>I</b>          |
| C*06:04                                                  | 06:04              |           |                                               | 0        | 0        | 236        | 2        | 1        | 1        | 7        | 247        |     |                                                      | I         |      |     |     | WD        | I         | I                 |
| C*06:04:01                                               | 06:04:01           | HLA00432  |                                               | 0        | 0        | 97         | 0        | 1        | 0        | 0        | 98         |     |                                                      | WD        |      |     |     |           | WD        | WD                |
| C*06:04:02                                               | 06:04:02           | HLA13971  |                                               | 0        | 1        | 0          | 0        | 0        | 0        | 0        | 1          |     |                                                      |           |      |     |     |           |           |                   |
| C*06:06                                                  | 06:06              | HLA01258  |                                               | 8        | 9        | 309        | 79       | 7        | 0        | 42       | 454        | WD  | WD                                                   | I         | C    | I   |     | I         | I         | C                 |
| C*06:07                                                  | 06:07              | HLA01301  |                                               | 0        | 0        | 260        | 0        | 6        | 1        | 24       | 291        |     |                                                      | I         |      | WD  |     | I         | I         | I                 |
| C*06:08                                                  | 06:08              | HLA01628  |                                               | 71       | 0        | 14         | 0        | 20       | 3        | 22       | 130        | C   |                                                      | WD        |      | I   |     | I         | WD        | C                 |
| C*06:09                                                  | 06:09              | HLA01681  |                                               | 58       | 2        | 6          | 0        | 38       | 0        | 13       | 117        | C   |                                                      | WD        |      | I   |     | WD        | WD        | C                 |
| C*06:10                                                  | 06:10              | HLA01824  |                                               | 0        | 0        | 5          | 0        | 0        | 0        | 0        | 5          |     |                                                      | WD        |      |     |     |           | WD        | WD                |
| C*06:11                                                  | 06:11              | HLA01880  |                                               | 0        | 2        | 10         | 8        | 1        | 0        | 2        | 23         |     |                                                      | WD        | WD   |     |     |           | WD        | WD                |
| C*06:12                                                  | 06:12              | HLA02178  |                                               | 0        | 4        | 0          | 0        | 0        | 0        | 1        | 5          |     |                                                      |           |      |     |     |           | WD        | WD                |
| C*06:13                                                  | 06:13              | HLA02239  |                                               | 0        | 0        | 8          | 0        | 0        | 0        | 0        | 8          |     |                                                      | WD        |      |     |     |           | WD        | WD                |
| C*06:14                                                  | 06:14              | HLA02708  |                                               | 0        | 0        | 77         | 0        | 4        | 0        | 4        | 85         |     |                                                      | WD        |      |     |     |           | WD        | WD                |
| C*06:15                                                  | 06:15              | HLA02832  |                                               | 0        | 3        | 0          | 0        | 0        | 0        | 1        | 4          |     |                                                      |           |      |     |     |           |           |                   |
| C*06:16N                                                 | 06:16N             | HLA02833  |                                               | 0        | 0        | 11         | 0        | 1        | 0        | 1        | 13         |     |                                                      | WD        |      |     |     |           | WD        | WD                |
| C*06:18                                                  | 06:18              | HLA03429  |                                               | 0        | 0        | 133        | 0        | 0        | 0        | 3        | 136        |     |                                                      | I         |      |     |     |           | WD        | I                 |
| C*06:19                                                  | 06:19              | HLA03526  |                                               | 0        | 0        | 2          | 0        | 0        | 0        | 1        | 3          |     |                                                      |           |      |     |     |           |           |                   |
| C*06:20                                                  | 06:20              | HLA03624  |                                               | 0        | 1        | 0          | 0        | 0        | 0        | 0        | 1          |     |                                                      |           |      |     |     |           |           |                   |
| C*06:22                                                  | 06:22              | HLA03682  |                                               | 0        | 0        | 1          | 0        | 0        | 0        | 0        | 1          |     |                                                      |           |      |     |     |           |           |                   |
| C*06:23                                                  | 06:23              | HLA03697  |                                               | 0        | 1        | 101        | 0        | 0        | 0        | 2        | 104        |     |                                                      | WD        |      |     |     |           | WD        | WD                |
| C*06:25                                                  | 06:25              | HLA04294  |                                               | 0        | 0        | 2          | 0        | 0        | 0        | 0        | 2          |     |                                                      |           |      |     |     |           |           |                   |
| C*06:26                                                  | 06:26              | HLA04295  |                                               | 0        | 0        | 9          | 0        | 1        | 0        | 1        | 11         |     |                                                      | WD        |      |     |     |           | WD        | WD                |
| C*06:27                                                  | 06:27              | HLA04299  |                                               | 0        | 299      | 7          | 8        | 0        | 0        | 10       | 324        |     | C                                                    | WD        | WD   |     |     | WD        | I         | C                 |
| C*06:28                                                  | 06:28              | HLA04307  |                                               | 0        | 0        | 56         | 0        | 0        | 0        | 2        | 58         |     |                                                      | WD        |      |     |     |           | WD        | WD                |
| C*06:30                                                  | 06:30              | HLA04697  |                                               | 0        | 3        | 61         | 1        | 2        | 0        | 4        | 71         |     |                                                      | WD        |      |     |     |           | WD        | WD                |
| C*06:32                                                  | 06:32              | HLA04745  |                                               | 2        | 0        | 5          | 0        | 0        | 0        | 0        | 7          |     |                                                      | WD        |      |     |     |           | WD        | WD                |

| Supplemental Table 10: HLA-C Allele Summary <sup>a</sup> |                    |           | Allele Count by Population Group <sup>b</sup> |     |     |      |      |     |     |     |       | 3.0.0 CIWD Category by Population Group <sup>c</sup> |     |      |      |     |     |     |       |                   |
|----------------------------------------------------------|--------------------|-----------|-----------------------------------------------|-----|-----|------|------|-----|-----|-----|-------|------------------------------------------------------|-----|------|------|-----|-----|-----|-------|-------------------|
| Allele                                                   | Genomic typing     | Allele ID | G group                                       | AFA | API | EURO | MENA | HIS | NAM | UNK | Total | AFA                                                  | API | EURO | MENA | HIS | NAM | UNK | Total | Highest Frequency |
| <b>C*06:34 total</b>                                     | <b>06:34 total</b> |           |                                               | 0   | 2   | 12   | 14   | 0   | 0   | 4   | 32    |                                                      |     | WD   | WD   |     |     |     | WD    | WD                |
| C*06:34                                                  | 06:34              |           |                                               | 0   | 0   | 7    | 12   | 0   | 0   | 2   | 21    |                                                      |     | WD   | WD   |     |     |     | WD    | WD                |
| C*06:34:01                                               | 06:34:01           | HLA04828  |                                               | 0   | 0   | 5    | 2    | 0   | 0   | 2   | 9     |                                                      |     | WD   |      |     |     |     | WD    | WD                |
| C*06:34:02                                               | 06:34:02           | HLA14020  |                                               | 0   | 2   | 0    | 0    | 0   | 0   | 0   | 2     |                                                      |     |      |      |     |     |     |       |                   |
| C*06:35                                                  | 06:35              | HLA04835  |                                               | 0   | 36  | 0    | 1    | 0   | 0   | 0   | 37    |                                                      | I   |      |      |     |     |     | WD    | I                 |
| C*06:36                                                  | 06:36              | HLA04837  |                                               | 0   | 0   | 1    | 0    | 0   | 0   | 0   | 1     |                                                      |     |      |      |     |     |     |       |                   |
| C*06:37                                                  | 06:37              | HLA04844  |                                               | 0   | 4   | 3    | 1    | 1   | 0   | 0   | 9     |                                                      |     |      |      |     |     |     | WD    | WD                |
| C*06:38                                                  | 06:38              | HLA05164  |                                               | 0   | 0   | 32   | 0    | 0   | 3   | 3   | 38    |                                                      |     | WD   |      |     |     |     | WD    | WD                |
| C*06:39                                                  | 06:39              | HLA05168  |                                               | 0   | 0   | 4    | 0    | 0   | 0   | 1   | 5     |                                                      |     |      |      |     |     |     | WD    | WD                |
| C*06:41                                                  | 06:41              | HLA05192  |                                               | 0   | 0   | 3    | 0    | 0   | 0   | 0   | 3     |                                                      |     |      |      |     |     |     |       |                   |
| <b>C*06:42 total</b>                                     | <b>06:42 total</b> |           |                                               | 0   | 0   | 2    | 0    | 0   | 0   | 0   | 2     |                                                      |     |      |      |     |     |     |       |                   |
| C*06:42:01                                               | 06:42:01           | HLA05207  |                                               | 0   | 0   | 2    | 0    | 0   | 0   | 0   | 2     |                                                      |     |      |      |     |     |     |       |                   |
| <b>C*06:43 total</b>                                     | <b>06:43 total</b> |           |                                               | 0   | 0   | 4    | 0    | 0   | 0   | 0   | 4     |                                                      |     |      |      |     |     |     |       |                   |
| C*06:43                                                  | 06:43              |           |                                               | 0   | 0   | 1    | 0    | 0   | 0   | 0   | 1     |                                                      |     |      |      |     |     |     |       |                   |
| C*06:43:02                                               | 06:43:02           | HLA09180  |                                               | 0   | 0   | 3    | 0    | 0   | 0   | 0   | 3     |                                                      |     |      |      |     |     |     |       |                   |
| C*06:44                                                  | 06:44              | HLA05397  |                                               | 0   | 0   | 0    | 2    | 0   | 0   | 0   | 2     |                                                      |     |      |      |     |     |     |       |                   |
| C*06:47                                                  | 06:47              | HLA05559  |                                               | 0   | 0   | 23   | 0    | 0   | 0   | 0   | 23    |                                                      |     | WD   |      |     |     |     | WD    | WD                |
| C*06:49N                                                 | 06:49N             | HLA05576  |                                               | 2   | 0   | 1    | 1    | 0   | 0   | 0   | 4     |                                                      |     |      |      |     |     |     |       |                   |
| C*06:50                                                  | 06:50              | HLA05583  |                                               | 0   | 0   | 5    | 0    | 0   | 0   | 1   | 6     |                                                      |     | WD   |      |     |     |     | WD    | WD                |
| C*06:51                                                  | 06:51              | HLA05598  |                                               | 1   | 0   | 0    | 0    | 0   | 0   | 0   | 1     |                                                      |     |      |      |     |     |     |       |                   |
| C*06:52                                                  | 06:52              | HLA05619  |                                               | 0   | 0   | 2    | 0    | 0   | 0   | 0   | 2     |                                                      |     |      |      |     |     |     |       |                   |
| <b>C*06:53 total</b>                                     | <b>06:53 total</b> |           |                                               | 0   | 0   | 3    | 6    | 0   | 0   | 0   | 9     |                                                      |     |      | WD   |     |     |     | WD    | WD                |
| C*06:53                                                  | 06:53              |           |                                               | 0   | 0   | 0    | 1    | 0   | 0   | 0   | 1     |                                                      |     |      |      |     |     |     |       |                   |
| C*06:53:01                                               | 06:53:01           | HLA05734  |                                               | 0   | 0   | 2    | 5    | 0   | 0   | 0   | 7     |                                                      |     |      | WD   |     |     |     | WD    | WD                |
| C*06:53:02                                               | 06:53:02           | HLA08473  |                                               | 0   | 0   | 1    | 0    | 0   | 0   | 0   | 1     |                                                      |     |      |      |     |     |     |       |                   |
| C*06:54                                                  | 06:54              | HLA05737  |                                               | 0   | 4   | 37   | 0    | 0   | 0   | 1   | 42    |                                                      |     | WD   |      |     |     |     | WD    | WD                |
| C*06:58                                                  | 06:58              | HLA06275  |                                               | 0   | 0   | 9    | 0    | 0   | 0   | 2   | 11    |                                                      |     | WD   |      |     |     |     | WD    | WD                |
| C*06:59                                                  | 06:59              | HLA06407  |                                               | 0   | 0   | 11   | 0    | 0   | 0   | 8   | 19    |                                                      |     | WD   |      |     |     | WD  | WD    | WD                |
| C*06:60                                                  | 06:60              | HLA06440  |                                               | 0   | 2   | 0    | 0    | 0   | 0   | 0   | 2     |                                                      |     |      |      |     |     |     |       |                   |
| C*06:61                                                  | 06:61              | HLA06441  |                                               | 0   | 0   | 2    | 0    | 0   | 0   | 0   | 2     |                                                      |     |      |      |     |     |     |       |                   |
| C*06:62                                                  | 06:62              | HLA06714  |                                               | 0   | 0   | 1    | 0    | 0   | 0   | 0   | 1     |                                                      |     |      |      |     |     |     |       |                   |

| Supplemental Table 10: HLA-C Allele Summary <sup>a</sup> |                    |           | Allele Count by Population Group <sup>b</sup> |          |          |          |          |          |          |          |           |     | 3.0.0 CIWD Category by Population Group <sup>c</sup> |           |      |     |     |     |           |                   |
|----------------------------------------------------------|--------------------|-----------|-----------------------------------------------|----------|----------|----------|----------|----------|----------|----------|-----------|-----|------------------------------------------------------|-----------|------|-----|-----|-----|-----------|-------------------|
| Allele                                                   | Genomic typing     | Allele ID | G group                                       | AFA      | API      | EURO     | MENA     | HIS      | NAM      | UNK      | Total     | AFA | API                                                  | EURO      | MENA | HIS | NAM | UNK | Total     | Highest Frequency |
| C*06:63                                                  | 06:63              | HLA06732  |                                               | 0        | 0        | 1        | 0        | 0        | 0        | 0        | 1         |     |                                                      |           |      |     |     |     |           |                   |
| C*06:64                                                  | 06:64              | HLA06734  |                                               | 0        | 0        | 2        | 0        | 0        | 0        | 0        | 2         |     |                                                      |           |      |     |     |     |           |                   |
| C*06:65                                                  | 06:65              | HLA07046  |                                               | 0        | 0        | 10       | 0        | 0        | 0        | 0        | 10        |     |                                                      | WD        |      |     |     |     | WD        | WD                |
| C*06:66                                                  | 06:66              | HLA07065  |                                               | 0        | 0        | 8        | 0        | 0        | 0        | 1        | 9         |     |                                                      | WD        |      |     |     |     | WD        | WD                |
| C*06:67                                                  | 06:67              | HLA07069  |                                               | 0        | 0        | 0        | 0        | 2        | 0        | 0        | 2         |     |                                                      |           |      |     |     |     |           |                   |
| C*06:69                                                  | 06:69              | HLA07131  |                                               | 0        | 0        | 1        | 0        | 0        | 0        | 0        | 1         |     |                                                      |           |      |     |     |     |           |                   |
| <b>C*06:70 total</b>                                     | <b>06:70 total</b> |           |                                               | <b>0</b> | <b>0</b> | <b>9</b> | <b>1</b> | <b>0</b> | <b>0</b> | <b>0</b> | <b>10</b> |     |                                                      | <b>WD</b> |      |     |     |     | <b>WD</b> | <b>WD</b>         |
| C*06:70                                                  | 06:70              |           |                                               | 0        | 0        | 2        | 1        | 0        | 0        | 0        | 3         |     |                                                      |           |      |     |     |     |           |                   |
| C*06:70:01                                               | 06:70:01           | HLA07478  |                                               | 0        | 0        | 7        | 0        | 0        | 0        | 0        | 7         |     |                                                      | WD        |      |     |     |     | WD        | WD                |
| C*06:71                                                  | 06:71              | HLA07479  |                                               | 0        | 0        | 17       | 0        | 0        | 0        | 0        | 17        |     |                                                      | WD        |      |     |     |     | WD        | WD                |
| C*06:75                                                  | 06:75              | HLA07740  |                                               | 0        | 1        | 0        | 0        | 0        | 0        | 0        | 1         |     |                                                      |           |      |     |     |     |           |                   |
| <b>C*06:76 total</b>                                     | <b>06:76 total</b> |           |                                               | <b>0</b> | <b>0</b> | <b>2</b> | <b>0</b> | <b>1</b> | <b>0</b> | <b>0</b> | <b>3</b>  |     |                                                      |           |      |     |     |     |           |                   |
| C*06:76:01                                               | 06:76:01           | HLA07815  |                                               | 0        | 0        | 1        | 0        | 0        | 0        | 0        | 1         |     |                                                      |           |      |     |     |     |           |                   |
| C*06:76:02                                               | 06:76:02           | HLA08205  |                                               | 0        | 0        | 1        | 0        | 1        | 0        | 0        | 2         |     |                                                      |           |      |     |     |     |           |                   |
| C*06:77                                                  | 06:77              | HLA07826  |                                               | 0        | 0        | 3        | 1        | 0        | 0        | 0        | 4         |     |                                                      |           |      |     |     |     |           |                   |
| C*06:78                                                  | 06:78              | HLA07827  |                                               | 0        | 0        | 4        | 0        | 0        | 0        | 0        | 4         |     |                                                      |           |      |     |     |     |           |                   |
| C*06:79N                                                 | 06:79N             | HLA07830  |                                               | 0        | 27       | 0        | 0        | 0        | 0        | 0        | 27        |     | I                                                    |           |      |     |     |     | WD        | I                 |
| C*06:80                                                  | 06:80              | HLA07831  |                                               | 0        | 1        | 1        | 0        | 0        | 0        | 0        | 2         |     |                                                      |           |      |     |     |     |           |                   |
| C*06:81                                                  | 06:81              | HLA07833  |                                               | 0        | 0        | 1        | 0        | 0        | 0        | 0        | 1         |     |                                                      |           |      |     |     |     |           |                   |
| C*06:82                                                  | 06:82              | HLA07834  |                                               | 0        | 1        | 0        | 0        | 0        | 0        | 0        | 1         |     |                                                      |           |      |     |     |     |           |                   |
| C*06:84                                                  | 06:84              | HLA08148  |                                               | 0        | 3        | 0        | 0        | 0        | 0        | 0        | 3         |     |                                                      |           |      |     |     |     |           |                   |
| C*06:85                                                  | 06:85              | HLA08149  |                                               | 0        | 0        | 1        | 0        | 0        | 0        | 0        | 1         |     |                                                      |           |      |     |     |     |           |                   |
| C*06:86                                                  | 06:86              | HLA08181  |                                               | 0        | 0        | 16       | 0        | 0        | 0        | 0        | 16        |     |                                                      | WD        |      |     |     |     | WD        | WD                |
| C*06:87                                                  | 06:87              | HLA08182  |                                               | 0        | 0        | 17       | 0        | 0        | 0        | 2        | 19        |     |                                                      | WD        |      |     |     |     | WD        | WD                |
| C*06:89                                                  | 06:89              | HLA08695  |                                               | 0        | 2        | 2        | 0        | 0        | 0        | 0        | 4         |     |                                                      |           |      |     |     |     |           |                   |
| C*06:90                                                  | 06:90              | HLA08696  |                                               | 0        | 0        | 2        | 1        | 0        | 0        | 0        | 3         |     |                                                      |           |      |     |     |     |           |                   |
| C*06:91                                                  | 06:91              | HLA08697  |                                               | 0        | 0        | 14       | 0        | 0        | 0        | 0        | 14        |     |                                                      | WD        |      |     |     |     | WD        | WD                |
| C*06:92                                                  | 06:92              | HLA08700  |                                               | 2        | 0        | 0        | 0        | 0        | 0        | 1        | 3         |     |                                                      |           |      |     |     |     |           |                   |
| C*06:95                                                  | 06:95              | HLA09015  |                                               | 0        | 0        | 2        | 0        | 0        | 0        | 0        | 2         |     |                                                      |           |      |     |     |     |           |                   |
| C*06:96                                                  | 06:96              | HLA09017  |                                               | 0        | 7        | 4        | 1        | 0        | 0        | 3        | 15        |     | WD                                                   |           |      |     |     |     | WD        | WD                |
| C*06:97                                                  | 06:97              | HLA09179  |                                               | 0        | 0        | 0        | 0        | 0        | 0        | 1        | 1         |     |                                                      |           |      |     |     |     |           |                   |



| Supplemental Table 10: HLA-C Allele Summary <sup>a</sup> |                         |           | Allele Count by Population Group <sup>b</sup> |          |           |          |          |          |          |          |           |     | 3.0.0 CIWD Category by Population Group <sup>c</sup> |      |      |     |     |     |       |                   |    |    |
|----------------------------------------------------------|-------------------------|-----------|-----------------------------------------------|----------|-----------|----------|----------|----------|----------|----------|-----------|-----|------------------------------------------------------|------|------|-----|-----|-----|-------|-------------------|----|----|
| Allele                                                   | Genomic typing          | Allele ID | G group                                       | AFA      | API       | EURO     | MENA     | HIS      | NAM      | UNK      | Total     | AFA | API                                                  | EURO | MENA | HIS | NAM | UNK | Total | Highest Frequency |    |    |
| C*06:98                                                  | 06:98                   | HLA09182  |                                               | 1        | 0         | 0        | 0        | 0        | 0        | 0        | 1         |     |                                                      |      |      |     |     |     |       |                   |    |    |
| C*06:101                                                 | 06:101                  | HLA09599  |                                               | 0        | 0         | 3        | 0        | 0        | 0        | 0        | 3         |     |                                                      |      |      |     |     |     |       |                   |    |    |
| C*06:103                                                 | 06:103                  | HLA09938  |                                               | 0        | 3         | 0        | 0        | 0        | 0        | 0        | 3         |     |                                                      |      |      |     |     |     |       |                   |    |    |
| C*06:104                                                 | 06:104                  | HLA09967  |                                               | 0        | 1         | 0        | 0        | 0        | 0        | 0        | 1         |     |                                                      |      |      |     |     |     |       |                   |    |    |
| <b>C*06:106 total</b>                                    | <b>06:106 total</b>     |           |                                               | <b>0</b> | <b>1</b>  | <b>2</b> | <b>1</b> | <b>0</b> | <b>0</b> | <b>0</b> | <b>4</b>  |     |                                                      |      |      |     |     |     |       |                   |    |    |
| C*06:106:01                                              | 06:106:01               | HLA09971  |                                               | 0        | 0         | 2        | 0        | 0        | 0        | 0        | 2         |     |                                                      |      |      |     |     |     |       |                   |    |    |
| C*06:106:02                                              | 06:106:02               | HLA09973  |                                               | 0        | 1         | 0        | 1        | 0        | 0        | 0        | 2         |     |                                                      |      |      |     |     |     |       |                   |    |    |
| C*06:113                                                 | 06:113                  | HLA10061  |                                               | 0        | 0         | 0        | 1        | 0        | 0        | 1        | 2         |     |                                                      |      |      |     |     |     |       |                   |    |    |
| C*06:115                                                 | 06:115                  | HLA10075  |                                               | 0        | 9         | 0        | 0        | 0        | 0        | 0        | 9         |     | WD                                                   |      |      |     |     |     | WD    | WD                |    |    |
| C*06:122                                                 | 06:122                  | HLA10603  |                                               | 0        | 0         | 1        | 0        | 0        | 0        | 1        | 2         |     |                                                      |      |      |     |     |     |       |                   |    |    |
| C*06:124                                                 | 06:124                  | HLA10924  |                                               | 0        | 2         | 0        | 0        | 0        | 0        | 0        | 2         |     |                                                      |      |      |     |     |     |       |                   |    |    |
| C*06:125                                                 | 06:125                  | HLA11041  |                                               | 0        | 0         | 1        | 0        | 0        | 0        | 0        | 1         |     |                                                      |      |      |     |     |     |       |                   |    |    |
| C*06:126                                                 | 06:126                  | HLA11045  |                                               | 1        | 0         | 0        | 0        | 0        | 0        | 0        | 1         |     |                                                      |      |      |     |     |     |       |                   |    |    |
| <b>C*06:127 total</b>                                    | <b>06:127 total</b>     |           |                                               | <b>3</b> | <b>20</b> | <b>2</b> | <b>1</b> | <b>0</b> | <b>0</b> | <b>2</b> | <b>28</b> |     | I                                                    |      |      |     |     |     | WD    | I                 |    |    |
| C*06:127                                                 | 06:127                  |           |                                               | 0        | 4         | 0        | 0        | 0        | 0        | 1        | 5         |     |                                                      |      |      |     |     |     |       | WD                | WD |    |
| <b>C*06:127:01G total</b>                                | <b>06:127:01G total</b> |           |                                               | <b>3</b> | <b>16</b> | <b>2</b> | <b>1</b> | <b>0</b> | <b>0</b> | <b>0</b> | <b>22</b> |     | I                                                    |      |      |     |     |     |       | WD                | I  |    |
| C*06:127:01G                                             | 06:127:01G              |           | 06:127:01G                                    | 0        | 13        | 0        | 0        | 0        | 0        | 0        | 13        |     | I                                                    |      |      |     |     |     |       |                   | WD | I  |
| C*06:127:01                                              | 06:127:01               |           | 06:127:01G                                    | 3        | 2         | 2        | 1        | 0        | 0        | 0        | 8         |     |                                                      |      |      |     |     |     |       |                   | WD | WD |
| C*06:127:01:01                                           | 06:127:01:01            | HLA11046  | 06:127:01G                                    | 0        | 1         | 0        | 0        | 0        | 0        | 0        | 1         |     |                                                      |      |      |     |     |     |       |                   |    |    |
| C*06:127:02                                              | 06:127:02               | HLA12318  |                                               | 0        | 0         | 0        | 0        | 0        | 0        | 1        | 1         |     |                                                      |      |      |     |     |     |       |                   |    |    |
| C*06:128N                                                | 06:128N                 | HLA11050  |                                               | 1        | 0         | 0        | 0        | 1        | 2        | 0        | 4         |     |                                                      |      |      |     |     |     |       |                   |    |    |
| C*06:129                                                 | 06:129                  | HLA11438  |                                               | 0        | 0         | 1        | 0        | 0        | 0        | 0        | 1         |     |                                                      |      |      |     |     |     |       |                   |    |    |
| C*06:131                                                 | 06:131                  | HLA11457  |                                               | 0        | 1         | 0        | 0        | 0        | 0        | 0        | 1         |     |                                                      |      |      |     |     |     |       |                   |    |    |
| <b>C*06:132 total</b>                                    | <b>06:132 total</b>     |           |                                               | <b>0</b> | <b>0</b>  | <b>2</b> | <b>0</b> | <b>0</b> | <b>0</b> | <b>2</b> | <b>4</b>  |     |                                                      |      |      |     |     |     |       |                   |    |    |
| C*06:132:01                                              | 06:132:01               | HLA11577  |                                               | 0        | 0         | 2        | 0        | 0        | 0        | 2        | 4         |     |                                                      |      |      |     |     |     |       |                   |    |    |
| C*06:133                                                 | 06:133                  | HLA12020  |                                               | 0        | 0         | 0        | 0        | 0        | 0        | 1        | 1         |     |                                                      |      |      |     |     |     |       |                   |    |    |
| C*06:136                                                 | 06:136                  | HLA12096  |                                               | 0        | 0         | 1        | 0        | 0        | 0        | 0        | 1         |     |                                                      |      |      |     |     |     |       |                   |    |    |
| C*06:138                                                 | 06:138                  | HLA12317  |                                               | 2        | 0         | 4        | 0        | 0        | 0        | 0        | 6         |     |                                                      |      |      |     |     |     |       |                   | WD | WD |
| C*06:139                                                 | 06:139                  | HLA12320  |                                               | 0        | 0         | 0        | 0        | 1        | 0        | 0        | 1         |     |                                                      |      |      |     |     |     |       |                   |    |    |
| C*06:140                                                 | 06:140                  | HLA12321  |                                               | 0        | 0         | 3        | 0        | 0        | 0        | 0        | 3         |     |                                                      |      |      |     |     |     |       |                   |    |    |
| C*06:142                                                 | 06:142                  | HLA12498  |                                               | 0        | 1         | 0        | 0        | 0        | 0        | 0        | 1         |     |                                                      |      |      |     |     |     |       |                   |    |    |

| Supplemental Table 10: HLA-C Allele Summary <sup>a</sup> |                         |           | Allele Count by Population Group <sup>b</sup> |              |              |                |              |              |             |               |                |          | 3.0.0 CIWD Category by Population Group <sup>c</sup> |          |          |          |          |          |          |                   |
|----------------------------------------------------------|-------------------------|-----------|-----------------------------------------------|--------------|--------------|----------------|--------------|--------------|-------------|---------------|----------------|----------|------------------------------------------------------|----------|----------|----------|----------|----------|----------|-------------------|
| Allele                                                   | Genomic typing          | Allele ID | G group                                       | AFA          | API          | EURO           | MENA         | HIS          | NAM         | UNK           | Total          | AFA      | API                                                  | EURO     | MENA     | HIS      | NAM      | UNK      | Total    | Highest Frequency |
| C*06:144                                                 | 06:144                  | HLA12656  |                                               | 0            | 0            | 1              | 0            | 0            | 0           | 0             | 1              |          |                                                      |          |          |          |          |          |          |                   |
| C*06:148                                                 | 06:148                  | HLA12696  |                                               | 0            | 0            | 3              | 0            | 0            | 0           | 0             | 3              |          |                                                      |          |          |          |          |          |          |                   |
| C*06:150                                                 | 06:150                  | HLA13031  |                                               | 2            | 0            | 0              | 0            | 0            | 0           | 0             | 2              |          |                                                      |          |          |          |          |          |          |                   |
| C*06:151                                                 | 06:151                  | HLA13032  |                                               | 0            | 0            | 1              | 0            | 0            | 0           | 0             | 1              |          |                                                      |          |          |          |          |          |          |                   |
| C*06:152N                                                | 06:152N                 | HLA13033  |                                               | 0            | 4            | 0              | 0            | 0            | 0           | 0             | 4              |          |                                                      |          |          |          |          |          |          |                   |
| <b>C*06:155 total</b>                                    | <b>06:155 total</b>     |           |                                               | <b>0</b>     | <b>0</b>     | <b>0</b>       | <b>0</b>     | <b>1</b>     | <b>0</b>    | <b>3</b>      | <b>4</b>       |          |                                                      |          |          |          |          |          |          |                   |
| <b>C*06:155:01G total</b>                                | <b>06:155:01G total</b> |           |                                               | <b>0</b>     | <b>0</b>     | <b>0</b>       | <b>0</b>     | <b>1</b>     | <b>0</b>    | <b>3</b>      | <b>4</b>       |          |                                                      |          |          |          |          |          |          |                   |
| C*06:155:01                                              | 06:155:01               |           | 06:155:01G                                    | 0            | 0            | 0              | 0            | 1            | 0           | 3             | 4              |          |                                                      |          |          |          |          |          |          |                   |
| C*06:158                                                 | 06:158                  | HLA13551  |                                               | 0            | 0            | 1              | 0            | 0            | 0           | 0             | 1              |          |                                                      |          |          |          |          |          |          |                   |
| C*06:162                                                 | 06:162                  | HLA13666  |                                               | 0            | 1            | 0              | 0            | 0            | 0           | 0             | 1              |          |                                                      |          |          |          |          |          |          |                   |
| C*06:164                                                 | 06:164                  | HLA13746  |                                               | 0            | 2            | 0              | 0            | 0            | 0           | 0             | 2              |          |                                                      |          |          |          |          |          |          |                   |
| C*06:174                                                 | 06:174                  | HLA14738  |                                               | 0            | 0            | 1              | 0            | 0            | 0           | 0             | 1              |          |                                                      |          |          |          |          |          |          |                   |
| C*06:177                                                 | 06:177                  | HLA15036  |                                               | 0            | 1            | 0              | 0            | 0            | 0           | 0             | 1              |          |                                                      |          |          |          |          |          |          |                   |
| C*06:185                                                 | 06:185                  | HLA15207  |                                               | 0            | 0            | 1              | 0            | 0            | 0           | 0             | 1              |          |                                                      |          |          |          |          |          |          |                   |
| C*06:189                                                 | 06:189                  | HLA15423  |                                               | 0            | 1            | 0              | 0            | 0            | 0           | 0             | 1              |          |                                                      |          |          |          |          |          |          |                   |
| C*06:203                                                 | 06:203                  | HLA17504  |                                               | 0            | 1            | 0              | 0            | 0            | 0           | 0             | 1              |          |                                                      |          |          |          |          |          |          |                   |
| C*06:CODE                                                | 06:CODE                 |           |                                               | 4287         | 4955         | 122747         | 2299         | 6062         | 736         | 15249         | 156335         | NA       | NA                                                   | NA       | NA       | NA       | NA       | NA       | NA       | NA                |
| <b>C*07:01 total</b>                                     | <b>07:01 total</b>      |           |                                               | <b>41415</b> | <b>89717</b> | <b>1523480</b> | <b>39220</b> | <b>60391</b> | <b>6244</b> | <b>143555</b> | <b>1904022</b> | <b>C</b> | <b>C</b>                                             | <b>C</b> | <b>C</b> | <b>C</b> | <b>C</b> | <b>C</b> | <b>C</b> | <b>C</b>          |
| C*07:01                                                  | 07:01                   |           |                                               | 20           | 6            | 8003           | 31           | 24           | 0           | 353           | 8437           | WD       | WD                                                   | C        | WD       | I        |          | C        | C        | C                 |
| C*07:01P                                                 | 07:01P                  |           |                                               | 11           | 0            | 3153           | 16           | 5            | 0           | 14            | 3199           | WD       |                                                      | C        | WD       | WD       |          | I        | C        | C                 |
| <b>C*07:01:01G total</b>                                 | <b>07:01:01G total</b>  |           |                                               | <b>41326</b> | <b>89655</b> | <b>1511817</b> | <b>39158</b> | <b>60342</b> | <b>6242</b> | <b>143089</b> | <b>1891629</b> | <b>C</b> | <b>C</b>                                             | <b>C</b> | <b>C</b> | <b>C</b> | <b>C</b> | <b>C</b> | <b>C</b> | <b>C</b>          |
| C*07:01:01G                                              | 07:01:01G               |           | 07:01:01G                                     | 33952        | 84827        | 1434796        | 38057        | 45216        | 4655        | 132142        | 1773645        | C        | C                                                    | C        | C        | C        | C        | C        | C        | C                 |
| C*07:01:01                                               | 07:01:01                |           | 07:01:01G                                     | 1070         | 310          | 23957          | 245          | 3745         | 294         | 2853          | 32474          | C        | C                                                    | C        | C        | C        | C        | C        | C        | C                 |
| C*07:01:01:01                                            | 07:01:01:01             | HLA00433  | 07:01:01G                                     | 2444         | 540          | 47295          | 480          | 8058         | 724         | 6145          | 65686          | C        | C                                                    | C        | C        | C        | C        | C        | C        | C                 |
| C*07:01:01:02                                            | 07:01:01:02             | HLA07937  | 07:01:01G                                     | 1            | 0            | 26             | 0            | 0            | 0           | 4             | 31             |          |                                                      | WD       |          |          |          |          | WD       | WD                |
| C*07:01:01:04                                            | 07:01:01:04             | HLA14091  | 07:01:01G                                     | 5            | 185          | 18             | 1            | 5            | 1           | 25            | 240            | WD       | C                                                    | WD       |          | WD       |          | I        | I        | C                 |
| C*07:01:01:05                                            | 07:01:01:05             | HLA14810  | 07:01:01G                                     | 0            | 0            | 3              | 0            | 0            | 0           | 0             | 3              |          |                                                      |          |          |          |          |          |          |                   |
| C*07:01:01:06                                            | 07:01:01:06             | HLA15767  | 07:01:01G                                     | 1            | 0            | 123            | 0            | 5            | 2           | 12            | 143            |          |                                                      | I        |          | WD       |          | WD       | WD       | I                 |
| C*07:01:01:08                                            | 07:01:01:08             | HLA16181  | 07:01:01G                                     | 0            | 0            | 5              | 0            | 0            | 0           | 0             | 5              |          |                                                      | WD       |          |          |          |          | WD       | WD                |
| C*07:01:01:09                                            | 07:01:01:09             | HLA16650  | 07:01:01G                                     | 4            | 1            | 20             | 3            | 23           | 2           | 10            | 63             |          |                                                      | WD       |          | I        |          | WD       | WD       | I                 |
| C*07:01:01:15                                            | 07:01:01:15             | HLA16818  | 07:01:01G                                     | 0            | 0            | 2              | 0            | 0            | 0           | 0             | 2              |          |                                                      |          |          |          |          |          |          |                   |

| Supplemental Table 10: HLA-C Allele Summary <sup>a</sup> |                        |           |           | Allele Count by Population Group <sup>b</sup> |             |            |           |            |           |            |             | 3.0.0 CIWD Category by Population Group <sup>c</sup> |          |          |          |          |          |          |          |                   |
|----------------------------------------------------------|------------------------|-----------|-----------|-----------------------------------------------|-------------|------------|-----------|------------|-----------|------------|-------------|------------------------------------------------------|----------|----------|----------|----------|----------|----------|----------|-------------------|
| Allele                                                   | Genomic typing         | Allele ID | G group   | AFA                                           | API         | EURO       | MENA      | HIS        | NAM       | UNK        | Total       | AFA                                                  | API      | EURO     | MENA     | HIS      | NAM      | UNK      | Total    | Highest Frequency |
| C*07:01:01:17                                            | 07:01:01:17            | HLA16868  | 07:01:01G | 0                                             | 0           | 1          | 0         | 0          | 0         | 0          | 1           |                                                      |          |          |          |          |          |          |          |                   |
| C*07:01:01:18                                            | 07:01:01:18            | HLA17058  | 07:01:01G | 0                                             | 0           | 2          | 0         | 1          | 0         | 1          | 4           |                                                      |          |          |          |          |          |          |          |                   |
| C*07:01:01:19                                            | 07:01:01:19            | HLA17978  | 07:01:01G | 0                                             | 0           | 0          | 0         | 0          | 0         | 1          | 1           |                                                      |          |          |          |          |          |          |          |                   |
| C*07:01:02                                               | 07:01:02               | HLA00992  | 07:01:01G | 1164                                          | 519         | 2400       | 219       | 1583       | 271       | 671        | 6827        | C                                                    | C        | C        | C        | C        | C        | C        | C        | C                 |
| C*07:01:09                                               | 07:01:09               | HLA03015  | 07:01:01G | 0                                             | 0           | 113        | 0         | 40         | 0         | 14         | 167         |                                                      |          | WD       |          | I        |          | I        | I        | I                 |
| <b>C*07:06 total</b>                                     | <b>07:06 total</b>     |           |           | <b>298</b>                                    | <b>3226</b> | <b>269</b> | <b>50</b> | <b>295</b> | <b>81</b> | <b>328</b> | <b>4547</b> | <b>C</b>                                             | <b>C</b> | <b>I</b> | <b>C</b> | <b>C</b> | <b>C</b> | <b>C</b> | <b>C</b> | <b>C</b>          |
| C*07:06                                                  | 07:06                  |           | 07:01:01G | 298                                           | 3226        | 269        | 50        | 295        | 81        | 328        | 4547        | C                                                    | C        | I        | C        | C        | C        | C        | C        | C                 |
| C*07:18                                                  | 07:18                  | HLA01672  | 07:01:01G | 2387                                          | 47          | 2783       | 103       | 1371       | 212       | 881        | 7784        | C                                                    | I        | C        | C        | C        | C        | C        | C        | C                 |
| C*07:52                                                  | 07:52                  | HLA03135  | 07:01:01G | 0                                             | 0           | 1          | 0         | 0          | 0         | 2          | 3           |                                                      |          |          |          |          |          |          |          |                   |
| C*07:337                                                 | 07:337                 | HLA10114  | 07:01:01G | 0                                             | 0           | 1          | 0         | 0          | 0         | 0          | 1           |                                                      |          |          |          |          |          |          |          |                   |
| C*07:419                                                 | 07:419                 | HLA13202  | 07:01:01G | 0                                             | 0           | 2          | 0         | 0          | 0         | 0          | 2           |                                                      |          |          |          |          |          |          |          |                   |
| C*07:01:03                                               | 07:01:03               | HLA01865  |           | 42                                            | 0           | 3          | 0         | 13         | 1         | 14         | 73          | C                                                    |          |          |          | I        |          | I        | WD       | C                 |
| C*07:01:04                                               | 07:01:04               | HLA02293  |           | 0                                             | 0           | 14         | 0         | 1          | 0         | 1          | 16          |                                                      |          | WD       |          |          |          |          | WD       | WD                |
| C*07:01:05                                               | 07:01:05               | HLA02422  |           | 11                                            | 4           | 56         | 5         | 0          | 0         | 5          | 81          | WD                                                   |          | WD       | WD       |          |          | WD       | WD       | WD                |
| C*07:01:06                                               | 07:01:06               | HLA02523  |           | 0                                             | 0           | 1          | 0         | 0          | 0         | 0          | 1           |                                                      |          |          |          |          |          |          |          |                   |
| C*07:01:07                                               | 07:01:07               | HLA02611  |           | 1                                             | 0           | 92         | 0         | 0          | 0         | 3          | 96          |                                                      |          | WD       |          |          |          |          | WD       | WD                |
| C*07:01:08                                               | 07:01:08               | HLA03012  |           | 0                                             | 0           | 242        | 0         | 4          | 1         | 63         | 310         |                                                      |          | I        |          |          |          | I        | I        | I                 |
| C*07:01:10                                               | 07:01:10               | HLA04325  |           | 0                                             | 0           | 26         | 0         | 0          | 0         | 0          | 26          |                                                      |          | WD       |          |          |          |          | WD       | WD                |
| C*07:01:12                                               | 07:01:12               | HLA04833  |           | 0                                             | 2           | 4          | 6         | 0          | 0         | 0          | 12          |                                                      |          |          | WD       |          |          |          | WD       | WD                |
| C*07:01:14                                               | 07:01:14               | HLA05603  |           | 0                                             | 1           | 0          | 0         | 0          | 0         | 0          | 1           |                                                      |          |          |          |          |          |          |          |                   |
| C*07:01:15                                               | 07:01:15               | HLA05626  |           | 0                                             | 0           | 8          | 0         | 0          | 0         | 0          | 8           |                                                      |          | WD       |          |          |          |          | WD       | WD                |
| C*07:01:16                                               | 07:01:16               | HLA05740  |           | 0                                             | 0           | 1          | 0         | 0          | 0         | 0          | 1           |                                                      |          |          |          |          |          |          |          |                   |
| C*07:01:17                                               | 07:01:17               | HLA06390  |           | 0                                             | 0           | 1          | 0         | 0          | 0         | 0          | 1           |                                                      |          |          |          |          |          |          |          |                   |
| C*07:01:18                                               | 07:01:18               | HLA06424  |           | 0                                             | 31          | 0          | 0         | 0          | 0         | 0          | 31          |                                                      | I        |          |          |          |          |          | WD       | I                 |
| <b>C*07:01:20G total</b>                                 | <b>07:01:20G total</b> |           |           | <b>0</b>                                      | <b>0</b>    | <b>3</b>   | <b>0</b>  | <b>0</b>   | <b>0</b>  | <b>0</b>   | <b>3</b>    |                                                      |          |          |          |          |          |          |          |                   |
| C*07:01:20G                                              | 07:01:20G              |           | 07:01:20G | 0                                             | 0           | 3          | 0         | 0          | 0         | 0          | 3           |                                                      |          |          |          |          |          |          |          |                   |
| C*07:01:23                                               | 07:01:23               | HLA07074  |           | 0                                             | 13          | 8          | 0         | 0          | 0         | 1          | 22          |                                                      | I        | WD       |          |          |          |          | WD       | I                 |
| C*07:01:24                                               | 07:01:24               | HLA07080  |           | 0                                             | 0           | 3          | 0         | 0          | 0         | 2          | 5           |                                                      |          |          |          |          |          |          | WD       | WD                |
| C*07:01:25                                               | 07:01:25               | HLA07845  |           | 0                                             | 0           | 4          | 0         | 0          | 0         | 1          | 5           |                                                      |          |          |          |          |          |          | WD       | WD                |
| C*07:01:26                                               | 07:01:26               | HLA07846  |           | 0                                             | 0           | 4          | 0         | 0          | 0         | 0          | 4           |                                                      |          |          |          |          |          |          |          |                   |
| C*07:01:28                                               | 07:01:28               | HLA08442  |           | 0                                             | 0           | 5          | 0         | 0          | 0         | 0          | 5           |                                                      |          | WD       |          |          |          |          | WD       | WD                |

| Supplemental Table 10: HLA-C Allele Summary <sup>a</sup> |                        |           | Allele Count by Population Group <sup>b</sup> |              |               |                |              |              |             |               |                | 3.0.0 CIWD Category by Population Group <sup>c</sup> |          |          |          |          |          |          |          |                   |
|----------------------------------------------------------|------------------------|-----------|-----------------------------------------------|--------------|---------------|----------------|--------------|--------------|-------------|---------------|----------------|------------------------------------------------------|----------|----------|----------|----------|----------|----------|----------|-------------------|
| Allele                                                   | Genomic typing         | Allele ID | G group                                       | AFA          | API           | EURO           | MENA         | HIS          | NAM         | UNK           | Total          | AFA                                                  | API      | EURO     | MENA     | HIS      | NAM      | UNK      | Total    | Highest Frequency |
| C*07:01:29                                               | 07:01:29               | HLA08709  |                                               | 0            | 0             | 1              | 0            | 0            | 0           | 1             | 2              |                                                      |          |          |          |          |          |          |          |                   |
| C*07:01:30                                               | 07:01:30               | HLA08711  |                                               | 0            | 0             | 4              | 0            | 0            | 0           | 1             | 5              |                                                      |          |          |          |          |          |          | WD       | WD                |
| C*07:01:31                                               | 07:01:31               | HLA08713  |                                               | 4            | 0             | 1              | 2            | 0            | 0           | 0             | 7              |                                                      |          |          |          |          |          |          | WD       | WD                |
| C*07:01:32                                               | 07:01:32               | HLA09020  |                                               | 0            | 0             | 1              | 0            | 0            | 0           | 0             | 1              |                                                      |          |          |          |          |          |          |          |                   |
| C*07:01:34                                               | 07:01:34               | HLA09607  |                                               | 0            | 0             | 3              | 0            | 0            | 0           | 1             | 4              |                                                      |          |          |          |          |          |          |          |                   |
| C*07:01:35                                               | 07:01:35               | HLA10065  |                                               | 0            | 0             | 0              | 0            | 0            | 0           | 1             | 1              |                                                      |          |          |          |          |          |          |          |                   |
| C*07:01:36                                               | 07:01:36               | HLA10066  |                                               | 0            | 3             | 1              | 0            | 0            | 0           | 0             | 4              |                                                      |          |          |          |          |          |          |          |                   |
| C*07:01:38                                               | 07:01:38               | HLA10428  |                                               | 0            | 0             | 0              | 1            | 0            | 0           | 0             | 1              |                                                      |          |          |          |          |          |          |          |                   |
| C*07:01:40                                               | 07:01:40               | HLA11051  |                                               | 0            | 0             | 0              | 0            | 0            | 0           | 1             | 1              |                                                      |          |          |          |          |          |          |          |                   |
| C*07:01:42                                               | 07:01:42               | HLA11256  |                                               | 0            | 0             | 0              | 0            | 1            | 0           | 3             | 4              |                                                      |          |          |          |          |          |          |          |                   |
| C*07:01:43                                               | 07:01:43               | HLA11460  |                                               | 0            | 0             | 4              | 0            | 0            | 0           | 0             | 4              |                                                      |          |          |          |          |          |          |          |                   |
| C*07:01:44                                               | 07:01:44               | HLA11776  |                                               | 0            | 0             | 4              | 0            | 0            | 0           | 0             | 4              |                                                      |          |          |          |          |          |          |          |                   |
| C*07:01:45                                               | 07:01:45               | HLA12088  |                                               | 0            | 0             | 1              | 1            | 0            | 0           | 0             | 2              |                                                      |          |          |          |          |          |          |          |                   |
| C*07:01:46                                               | 07:01:46               | HLA12500  |                                               | 0            | 0             | 1              | 0            | 0            | 0           | 0             | 1              |                                                      |          |          |          |          |          |          |          |                   |
| C*07:01:47                                               | 07:01:47               | HLA12705  |                                               | 0            | 0             | 5              | 0            | 0            | 0           | 0             | 5              |                                                      |          | WD       |          |          |          |          | WD       | WD                |
| C*07:01:48                                               | 07:01:48               | HLA13038  |                                               | 0            | 1             | 0              | 0            | 1            | 0           | 0             | 2              |                                                      |          |          |          |          |          |          |          |                   |
| C*07:01:49                                               | 07:01:49               | HLA13612  |                                               | 0            | 0             | 2              | 0            | 0            | 0           | 0             | 2              |                                                      |          |          |          |          |          |          |          |                   |
| C*07:01:50                                               | 07:01:50               | HLA13699  |                                               | 0            | 0             | 0              | 0            | 0            | 0           | 1             | 1              |                                                      |          |          |          |          |          |          |          |                   |
| C*07:01:51                                               | 07:01:51               | HLA13706  |                                               | 0            | 0             | 1              | 0            | 0            | 0           | 0             | 1              |                                                      |          |          |          |          |          |          |          |                   |
| C*07:01:53                                               | 07:01:53               | HLA14644  |                                               | 0            | 0             | 2              | 0            | 0            | 0           | 0             | 2              |                                                      |          |          |          |          |          |          |          |                   |
| C*07:01:57                                               | 07:01:57               | HLA15885  |                                               | 0            | 1             | 0              | 0            | 0            | 0           | 0             | 1              |                                                      |          |          |          |          |          |          |          |                   |
| C*07:453                                                 | 07:453                 | HLA13758  |                                               | 0            | 0             | 1              | 0            | 0            | 0           | 0             | 1              |                                                      |          |          |          |          |          |          |          |                   |
| <b>C*07:02 total</b>                                     | <b>07:02 total</b>     |           |                                               | <b>22061</b> | <b>158872</b> | <b>1344851</b> | <b>27801</b> | <b>75361</b> | <b>6466</b> | <b>132296</b> | <b>1767708</b> | <b>C</b>                                             | <b>C</b> | <b>C</b> | <b>C</b> | <b>C</b> | <b>C</b> | <b>C</b> | <b>C</b> | <b>C</b>          |
| C*07:02                                                  | 07:02                  |           |                                               | 25           | 97            | 4971           | 11           | 282          | 21          | 255           | 5662           | WD                                                   | I        | C        | WD       | C        | C        | C        | C        | C                 |
| C*07:02P                                                 | 07:02P                 |           |                                               | 1            | 13            | 986            | 3            | 8            | 0           | 6             | 1017           |                                                      | I        | I        |          | I        |          | WD       | I        | I                 |
| <b>C*07:02:01G total</b>                                 | <b>07:02:01G total</b> |           |                                               | <b>22025</b> | <b>158704</b> | <b>1337829</b> | <b>27779</b> | <b>75017</b> | <b>6444</b> | <b>131990</b> | <b>1759788</b> | <b>C</b>                                             | <b>C</b> | <b>C</b> | <b>C</b> | <b>C</b> | <b>C</b> | <b>C</b> | <b>C</b> | <b>C</b>          |
| C*07:02:01G                                              | 07:02:01G              |           | 07:02:01G                                     | 16595        | 141312        | 1260604        | 26972        | 50482        | 4488        | 115812        | 1616265        | C                                                    | C        | C        | C        | C        | C        | C        | C        | C                 |
| C*07:02:01                                               | 07:02:01               |           | 07:02:01G                                     | 2285         | 7870          | 33314          | 407          | 11211        | 847         | 8412          | 64346          | C                                                    | C        | C        | C        | C        | C        | C        | C        | C                 |
| C*07:02:01:01                                            | 07:02:01:01            | HLA00434  | 07:02:01G                                     | 2048         | 7674          | 3558           | 197          | 7579         | 633         | 2505          | 24194          | C                                                    | C        | C        | C        | C        | C        | C        | C        | C                 |
| C*07:02:01:03                                            | 07:02:01:03            | HLA01902  | 07:02:01G                                     | 1097         | 1755          | 40334          | 203          | 5692         | 473         | 5244          | 54798          | C                                                    | C        | C        | C        | C        | C        | C        | C        | C                 |
| C*07:02:01:05                                            | 07:02:01:05            | HLA07778  | 07:02:01G                                     | 0            | 28            | 0              | 0            | 0            | 0           | 2             | 30             |                                                      | I        |          |          |          |          |          | WD       | I                 |

| Supplemental Table 10: HLA-C Allele Summary <sup>a</sup> |                |           |           | Allele Count by Population Group <sup>b</sup> |     |      |      |     |     |     |       | 3.0.0 CIWD Category by Population Group <sup>c</sup> |     |      |      |     |     |     |       |                   |
|----------------------------------------------------------|----------------|-----------|-----------|-----------------------------------------------|-----|------|------|-----|-----|-----|-------|------------------------------------------------------|-----|------|------|-----|-----|-----|-------|-------------------|
| Allele                                                   | Genomic typing | Allele ID | G group   | AFA                                           | API | EURO | MENA | HIS | NAM | UNK | Total | AFA                                                  | API | EURO | MENA | HIS | NAM | UNK | Total | Highest Frequency |
| C*07:02:01:07                                            | 07:02:01:07    | HLA15122  | 07:02:01G | 0                                             | 0   | 1    | 0    | 0   | 0   | 0   | 1     |                                                      |     |      |      |     |     |     |       |                   |
| C*07:02:01:10                                            | 07:02:01:10    | HLA16177  | 07:02:01G | 0                                             | 0   | 1    | 0    | 0   | 0   | 0   | 1     |                                                      |     |      |      |     |     |     |       |                   |
| C*07:02:01:12                                            | 07:02:01:12    | HLA16179  | 07:02:01G | 0                                             | 0   | 2    | 0    | 0   | 0   | 0   | 2     |                                                      |     |      |      |     |     |     |       |                   |
| C*07:02:01:13                                            | 07:02:01:13    | HLA16180  | 07:02:01G | 0                                             | 0   | 0    | 0    | 0   | 0   | 1   | 1     |                                                      |     |      |      |     |     |     |       |                   |
| C*07:02:01:16                                            | 07:02:01:16    | HLA17053  | 07:02:01G | 0                                             | 0   | 2    | 0    | 0   | 0   | 0   | 2     |                                                      |     |      |      |     |     |     |       |                   |
| C*07:02:23                                               | 07:02:23       | HLA06042  | 07:02:01G | 0                                             | 0   | 2    | 0    | 0   | 1   | 0   | 3     |                                                      |     |      |      |     |     |     |       |                   |
| C*07:02:53                                               | 07:02:53       | HLA10612  | 07:02:01G | 0                                             | 4   | 0    | 0    | 0   | 0   | 1   | 5     |                                                      |     |      |      |     |     |     | WD    | WD                |
| C*07:02:60                                               | 07:02:60       | HLA11570  | 07:02:01G | 0                                             | 1   | 0    | 0    | 0   | 0   | 0   | 1     |                                                      |     |      |      |     |     |     |       |                   |
| C*07:02:70                                               | 07:02:70       | HLA14377  | 07:02:01G | 0                                             | 1   | 0    | 0    | 0   | 0   | 0   | 1     |                                                      |     |      |      |     |     |     |       |                   |
| C*07:02:79                                               | 07:02:79       | HLA16731  | 07:02:01G | 0                                             | 0   | 1    | 0    | 0   | 0   | 0   | 1     |                                                      |     |      |      |     |     |     |       |                   |
| C*07:50                                                  | 07:50          | HLA03004  | 07:02:01G | 0                                             | 0   | 2    | 0    | 0   | 0   | 0   | 2     |                                                      |     |      |      |     |     |     |       |                   |
| C*07:66                                                  | 07:66          | HLA03631  | 07:02:01G | 0                                             | 41  | 0    | 0    | 0   | 0   | 3   | 44    |                                                      | I   |      |      |     |     |     | WD    | I                 |
| C*07:74                                                  | 07:74          | HLA03977  | 07:02:01G | 0                                             | 1   | 4    | 0    | 52  | 2   | 3   | 62    |                                                      |     |      |      | I   |     |     | WD    | I                 |
| C*07:160                                                 | 07:160         | HLA05889  | 07:02:01G | 0                                             | 0   | 0    | 0    | 0   | 0   | 1   | 1     |                                                      |     |      |      |     |     |     |       |                   |
| C*07:308                                                 | 07:308         | HLA09511  | 07:02:01G | 0                                             | 0   | 3    | 0    | 0   | 0   | 0   | 3     |                                                      |     |      |      |     |     |     |       |                   |
| C*07:359                                                 | 07:359         | HLA11071  | 07:02:01G | 0                                             | 17  | 1    | 0    | 1   | 0   | 5   | 24    |                                                      | I   |      |      |     |     | WD  | WD    | I                 |
| C*07:500                                                 | 07:500         | HLA14897  | 07:02:01G | 0                                             | 0   | 0    | 0    | 0   | 0   | 1   | 1     |                                                      |     |      |      |     |     |     |       |                   |
| C*07:02:02                                               | 07:02:02       | HLA03232  |           | 0                                             | 4   | 2    | 0    | 1   | 0   | 0   | 7     |                                                      |     |      |      |     |     |     | WD    | WD                |
| C*07:02:03                                               | 07:02:03       | HLA03459  |           | 0                                             | 0   | 3    | 0    | 0   | 0   | 0   | 3     |                                                      |     |      |      |     |     |     |       |                   |
| C*07:02:04                                               | 07:02:04       | HLA03638  |           | 0                                             | 4   | 12   | 2    | 0   | 0   | 1   | 19    |                                                      |     | WD   |      |     |     |     | WD    | WD                |
| C*07:02:06                                               | 07:02:06       | HLA03976  |           | 0                                             | 16  | 1    | 0    | 0   | 0   | 1   | 18    |                                                      | I   |      |      |     |     |     | WD    | I                 |
| C*07:02:07                                               | 07:02:07       | HLA04314  |           | 0                                             | 0   | 11   | 0    | 0   | 0   | 0   | 11    |                                                      |     | WD   |      |     |     |     | WD    | WD                |
| C*07:02:08                                               | 07:02:08       | HLA04315  |           | 1                                             | 0   | 148  | 0    | 3   | 0   | 10  | 162   |                                                      |     | I    |      |     |     | WD  | I     | I                 |
| C*07:02:09                                               | 07:02:09       | HLA04317  |           | 0                                             | 1   | 0    | 0    | 0   | 0   | 0   | 1     |                                                      |     |      |      |     |     |     |       |                   |
| C*07:02:10                                               | 07:02:10       | HLA04320  |           | 0                                             | 0   | 632  | 0    | 0   | 0   | 5   | 637   |                                                      |     | I    |      |     |     | WD  | I     | I                 |
| C*07:02:11                                               | 07:02:11       | HLA04344  |           | 4                                             | 1   | 37   | 1    | 1   | 0   | 4   | 48    |                                                      |     | WD   |      |     |     |     | WD    | WD                |
| C*07:02:12                                               | 07:02:12       | HLA04612  |           | 0                                             | 1   | 1    | 0    | 0   | 0   | 0   | 2     |                                                      |     |      |      |     |     |     |       |                   |
| C*07:02:13                                               | 07:02:13       | HLA04630  |           | 0                                             | 12  | 0    | 0    | 0   | 0   | 2   | 14    |                                                      | WD  |      |      |     |     |     | WD    | WD                |
| C*07:02:14                                               | 07:02:14       | HLA04824  |           | 0                                             | 0   | 11   | 0    | 0   | 0   | 0   | 11    |                                                      |     | WD   |      |     |     |     | WD    | WD                |
| C*07:02:16                                               | 07:02:16       | HLA05190  |           | 3                                             | 0   | 26   | 0    | 2   | 0   | 7   | 38    |                                                      |     | WD   |      |     |     | WD  | WD    | WD                |
| C*07:02:18                                               | 07:02:18       | HLA05580  |           | 0                                             | 0   | 76   | 0    | 0   | 0   | 0   | 76    |                                                      |     | WD   |      |     |     |     | WD    | WD                |

| Supplemental Table 10: HLA-C Allele Summary <sup>a</sup> |                    |           | Allele Count by Population Group <sup>b</sup> |             |              |               |             |             |            |              |               | 3.0.0 CIWD Category by Population Group <sup>c</sup> |          |          |          |          |          |          |          |                   |
|----------------------------------------------------------|--------------------|-----------|-----------------------------------------------|-------------|--------------|---------------|-------------|-------------|------------|--------------|---------------|------------------------------------------------------|----------|----------|----------|----------|----------|----------|----------|-------------------|
| Allele                                                   | Genomic typing     | Allele ID | G group                                       | AFA         | API          | EURO          | MENA        | HIS         | NAM        | UNK          | Total         | AFA                                                  | API      | EURO     | MENA     | HIS      | NAM      | UNK      | Total    | Highest Frequency |
| C*07:02:20                                               | 07:02:20           | HLA05732  |                                               | 1           | 0            | 5             | 0           | 47          | 0          | 8            | 61            |                                                      |          | WD       |          | I        |          | WD       | WD       | I                 |
| C*07:02:22                                               | 07:02:22           | HLA05937  |                                               | 0           | 0            | 2             | 0           | 0           | 0          | 0            | 2             |                                                      |          |          |          |          |          |          |          |                   |
| C*07:02:24                                               | 07:02:24           | HLA06381  |                                               | 0           | 0            | 25            | 0           | 0           | 0          | 0            | 25            |                                                      |          | WD       |          |          |          |          | WD       | WD                |
| C*07:02:27                                               | 07:02:27           | HLA07047  |                                               | 0           | 0            | 2             | 0           | 0           | 0          | 0            | 2             |                                                      |          |          |          |          |          |          |          |                   |
| C*07:02:28                                               | 07:02:28           | HLA07060  |                                               | 0           | 0            | 24            | 0           | 0           | 0          | 2            | 26            |                                                      |          | WD       |          |          |          |          | WD       | WD                |
| C*07:02:30                                               | 07:02:30           | HLA07731  |                                               | 0           | 0            | 1             | 0           | 0           | 0          | 0            | 1             |                                                      |          |          |          |          |          |          |          |                   |
| C*07:02:31                                               | 07:02:31           | HLA07828  |                                               | 0           | 0            | 2             | 0           | 0           | 0          | 0            | 2             |                                                      |          |          |          |          |          |          |          |                   |
| C*07:02:32                                               | 07:02:32           | HLA07841  |                                               | 0           | 0            | 11            | 0           | 0           | 0          | 0            | 11            |                                                      |          | WD       |          |          |          |          | WD       | WD                |
| C*07:02:35                                               | 07:02:35           | HLA08194  |                                               | 0           | 0            | 2             | 0           | 0           | 0          | 0            | 2             |                                                      |          |          |          |          |          |          |          |                   |
| C*07:02:36                                               | 07:02:36           | HLA08196  |                                               | 0           | 5            | 3             | 2           | 0           | 0          | 0            | 10            |                                                      | WD       |          |          |          |          |          | WD       | WD                |
| C*07:02:37                                               | 07:02:37           | HLA08721  |                                               | 0           | 2            | 0             | 0           | 0           | 0          | 0            | 2             |                                                      |          |          |          |          |          |          |          |                   |
| C*07:02:39                                               | 07:02:39           | HLA08727  |                                               | 0           | 0            | 5             | 0           | 0           | 0          | 0            | 5             |                                                      |          | WD       |          |          |          |          | WD       | WD                |
| C*07:02:40                                               | 07:02:40           | HLA09177  |                                               | 0           | 0            | 4             | 0           | 0           | 0          | 0            | 4             |                                                      |          |          |          |          |          |          |          |                   |
| C*07:02:41                                               | 07:02:41           | HLA09186  |                                               | 0           | 0            | 4             | 0           | 0           | 0          | 0            | 4             |                                                      |          |          |          |          |          |          |          |                   |
| C*07:02:42                                               | 07:02:42           | HLA09604  |                                               | 0           | 0            | 0             | 1           | 0           | 0          | 0            | 1             |                                                      |          |          |          |          |          |          |          |                   |
| C*07:02:44                                               | 07:02:44           | HLA09993  |                                               | 0           | 2            | 0             | 0           | 0           | 0          | 0            | 2             |                                                      |          |          |          |          |          |          |          |                   |
| C*07:02:46                                               | 07:02:46           | HLA10003  |                                               | 0           | 1            | 0             | 0           | 0           | 0          | 0            | 1             |                                                      |          |          |          |          |          |          |          |                   |
| C*07:02:49                                               | 07:02:49           | HLA10009  |                                               | 0           | 3            | 0             | 0           | 0           | 0          | 0            | 3             |                                                      |          |          |          |          |          |          |          |                   |
| C*07:02:52                                               | 07:02:52           | HLA10429  |                                               | 0           | 0            | 1             | 2           | 0           | 0          | 0            | 3             |                                                      |          |          |          |          |          |          |          |                   |
| C*07:02:54                                               | 07:02:54           | HLA11043  |                                               | 1           | 0            | 2             | 0           | 0           | 1          | 1            | 5             |                                                      |          |          |          |          |          |          | WD       | WD                |
| C*07:02:55                                               | 07:02:55           | HLA11089  |                                               | 0           | 6            | 2             | 0           | 0           | 0          | 1            | 9             |                                                      | WD       |          |          |          |          |          | WD       | WD                |
| C*07:02:58                                               | 07:02:58           | HLA11440  |                                               | 0           | 0            | 2             | 0           | 0           | 0          | 0            | 2             |                                                      |          |          |          |          |          |          |          |                   |
| C*07:02:62                                               | 07:02:62           | HLA11855  |                                               | 0           | 0            | 2             | 0           | 0           | 0          | 2            | 4             |                                                      |          |          |          |          |          |          |          |                   |
| C*07:02:65                                               | 07:02:65           | HLA12501  |                                               | 0           | 0            | 2             | 0           | 0           | 0          | 1            | 3             |                                                      |          |          |          |          |          |          |          |                   |
| C*07:02:67                                               | 07:02:67           | HLA12723  |                                               | 0           | 0            | 1             | 0           | 0           | 0          | 0            | 1             |                                                      |          |          |          |          |          |          |          |                   |
| C*07:02:69                                               | 07:02:69           | HLA13522  |                                               | 0           | 0            | 1             | 0           | 0           | 0          | 0            | 1             |                                                      |          |          |          |          |          |          |          |                   |
| C*07:02:74                                               | 07:02:74           | HLA15209  |                                               | 0           | 0            | 1             | 0           | 0           | 0          | 0            | 1             |                                                      |          |          |          |          |          |          |          |                   |
| C*07:02:76                                               | 07:02:76           | HLA15219  |                                               | 0           | 0            | 1             | 0           | 0           | 0          | 0            | 1             |                                                      |          |          |          |          |          |          |          |                   |
| <b>C*07:04 total</b>                                     | <b>07:04 total</b> |           |                                               | <b>2968</b> | <b>22295</b> | <b>220635</b> | <b>4046</b> | <b>4877</b> | <b>599</b> | <b>16842</b> | <b>272262</b> | <b>C</b>                                             | <b>C</b> | <b>C</b> | <b>C</b> | <b>C</b> | <b>C</b> | <b>C</b> | <b>C</b> | <b>C</b>          |
| C*07:04                                                  | 07:04              |           |                                               | 1           | 3            | 858           | 2           | 4           | 0          | 23           | 891           |                                                      |          | I        |          |          |          | I        | I        | I                 |
| C*07:04P                                                 | 07:04P             |           |                                               | 0           | 0            | 183           | 0           | 1           | 0          | 0            | 184           |                                                      |          | I        |          |          |          |          | I        | I                 |

| Supplemental Table 10: HLA-C Allele Summary <sup>a</sup> |                        |           | Allele Count by Population Group <sup>b</sup> |             |              |               |             |             |            |              |               | 3.0.0 CIWD Category by Population Group <sup>c</sup> |          |           |          |          |          |          |           |                   |
|----------------------------------------------------------|------------------------|-----------|-----------------------------------------------|-------------|--------------|---------------|-------------|-------------|------------|--------------|---------------|------------------------------------------------------|----------|-----------|----------|----------|----------|----------|-----------|-------------------|
| Allele                                                   | Genomic typing         | Allele ID | G group                                       | AFA         | API          | EURO          | MENA        | HIS         | NAM        | UNK          | Total         | AFA                                                  | API      | EURO      | MENA     | HIS      | NAM      | UNK      | Total     | Highest Frequency |
| <b>C*07:04:01G total</b>                                 | <b>07:04:01G total</b> |           |                                               | <b>2967</b> | <b>22276</b> | <b>219555</b> | <b>4044</b> | <b>4871</b> | <b>599</b> | <b>16818</b> | <b>271130</b> | <b>C</b>                                             | <b>C</b> | <b>C</b>  | <b>C</b> | <b>C</b> | <b>C</b> | <b>C</b> | <b>C</b>  | <b>C</b>          |
| C*07:04:01G                                              | 07:04:01G              |           | 07:04:01G                                     | 2360        | 20278        | 210218        | 3958        | 3429        | 462        | 15126        | 255831        | C                                                    | C        | C         | C        | C        | C        | C        | C         | C                 |
| C*07:04:01                                               | 07:04:01               |           | 07:04:01G                                     | 413         | 1476         | 6074          | 55          | 1020        | 95         | 1264         | 10397         | C                                                    | C        | C         | C        | C        | C        | C        | C         | C                 |
| C*07:04:01:01                                            | 07:04:01:01            | HLA00436  | 07:04:01G                                     | 194         | 522          | 3263          | 27          | 422         | 42         | 428          | 4898          | C                                                    | C        | C         | WD       | C        | C        | C        | C         | C                 |
| C*07:04:01:03                                            | 07:04:01:03            | HLA16823  | 07:04:01G                                     | 0           | 0            | 0             | 4           | 0           | 0          | 0            | 4             |                                                      |          |           |          |          |          |          |           |                   |
| <b>C*07:04:02G total</b>                                 | <b>07:04:02G total</b> |           |                                               | <b>0</b>    | <b>0</b>     | <b>6</b>      | <b>0</b>    | <b>0</b>    | <b>0</b>   | <b>0</b>     | <b>6</b>      |                                                      |          | <b>WD</b> |          |          |          |          | <b>WD</b> | <b>WD</b>         |
| C*07:04:02                                               | 07:04:02               |           | 07:04:02G                                     | 0           | 0            | 6             | 0           | 0           | 0          | 0            | 6             |                                                      |          | WD        |          |          |          |          | WD        | WD                |
| C*07:04:03                                               | 07:04:03               | HLA03538  |                                               | 0           | 0            | 0             | 0           | 1           | 0          | 0            | 1             |                                                      |          |           |          |          |          |          |           |                   |
| C*07:04:04                                               | 07:04:04               | HLA05352  |                                               | 0           | 15           | 0             | 0           | 0           | 0          | 0            | 15            |                                                      | I        |           |          |          |          |          | WD        | I                 |
| C*07:04:05                                               | 07:04:05               | HLA06444  |                                               | 0           | 0            | 2             | 0           | 0           | 0          | 0            | 2             |                                                      |          |           |          |          |          |          |           |                   |
| C*07:04:06                                               | 07:04:06               | HLA06824  |                                               | 0           | 0            | 26            | 0           | 0           | 0          | 1            | 27            |                                                      |          | WD        |          |          |          |          | WD        | WD                |
| C*07:04:08                                               | 07:04:08               | HLA08184  |                                               | 0           | 0            | 1             | 0           | 0           | 0          | 0            | 1             |                                                      |          |           |          |          |          |          |           |                   |
| C*07:04:09                                               | 07:04:09               | HLA10425  |                                               | 0           | 0            | 1             | 0           | 0           | 0          | 0            | 1             |                                                      |          |           |          |          |          |          |           |                   |
| C*07:04:10                                               | 07:04:10               | HLA12713  |                                               | 0           | 0            | 2             | 0           | 0           | 0          | 0            | 2             |                                                      |          |           |          |          |          |          |           |                   |
| C*07:04:11                                               | 07:04:11               | HLA15120  |                                               | 0           | 1            | 1             | 0           | 0           | 0          | 0            | 2             |                                                      |          |           |          |          |          |          |           |                   |
| C*07:05                                                  | 07:05                  | HLA00437  |                                               | 228         | 1            | 26            | 33          | 23          | 5          | 54           | 370           | C                                                    |          | WD        | WD       | I        | WD       | I        | I         | C                 |
| C*07:07                                                  | 07:07                  | HLA00439  |                                               | 1           | 2            | 374           | 20          | 61          | 1          | 73           | 532           |                                                      |          | I         | WD       | I        |          | I        | I         | I                 |
| C*07:08                                                  | 07:08                  | HLA00440  |                                               | 0           | 0            | 1             | 0           | 0           | 0          | 0            | 1             |                                                      |          |           |          |          |          |          |           |                   |
| C*07:09                                                  | 07:09                  | HLA00441  |                                               | 0           | 3            | 2             | 2           | 0           | 0          | 0            | 7             |                                                      |          |           |          |          |          |          | WD        | WD                |
| C*07:10                                                  | 07:10                  | HLA00442  |                                               | 0           | 1            | 391           | 0           | 4           | 0          | 25           | 421           |                                                      |          | I         |          |          |          | I        | I         | I                 |
| C*07:12                                                  | 07:12                  | HLA00444  |                                               | 1           | 1            | 438           | 0           | 3           | 0          | 28           | 471           |                                                      |          | I         |          |          |          | I        | I         | I                 |
| C*07:13                                                  | 07:13                  | HLA01079  |                                               | 0           | 88           | 33            | 6           | 0           | 0          | 6            | 133           |                                                      | I        | WD        | WD       |          |          | WD       | WD        | I                 |
| C*07:15                                                  | 07:15                  | HLA01408  |                                               | 1           | 4            | 146           | 0           | 0           | 0          | 4            | 155           |                                                      |          | I         |          |          |          |          | WD        | I                 |
| C*07:16                                                  | 07:16                  | HLA01588  |                                               | 4           | 0            | 48            | 2           | 0           | 0          | 15           | 69            |                                                      |          | WD        |          |          |          | I        | WD        | I                 |
| <b>C*07:17 total</b>                                     | <b>07:17 total</b>     |           |                                               | <b>6</b>    | <b>3</b>     | <b>174</b>    | <b>0</b>    | <b>192</b>  | <b>26</b>  | <b>35</b>    | <b>436</b>    | <b>WD</b>                                            |          | <b>I</b>  |          | <b>C</b> | <b>C</b> | <b>I</b> | <b>I</b>  | <b>C</b>          |
| C*07:17                                                  | 07:17                  |           |                                               | 0           | 1            | 37            | 0           | 58          | 7          | 13           | 116           |                                                      |          | WD        |          | I        | C        | WD       | WD        | C                 |
| C*07:17:01                                               | 07:17:01               | HLA01662  |                                               | 6           | 2            | 135           | 0           | 134         | 19         | 22           | 318           | WD                                                   |          | I         |          | C        | C        | I        | I         | C                 |
| C*07:17:02                                               | 07:17:02               | HLA08720  |                                               | 0           | 0            | 2             | 0           | 0           | 0          | 0            | 2             |                                                      |          |           |          |          |          |          |           |                   |
| C*07:19                                                  | 07:19                  | HLA01720  |                                               | 43          | 3            | 306           | 62          | 28          | 0          | 22           | 464           | C                                                    |          | I         | C        | I        |          | I        | I         | C                 |
| C*07:21                                                  | 07:21                  | HLA01833  |                                               | 2           | 0            | 109           | 0           | 2           | 1          | 25           | 139           |                                                      |          | WD        |          |          |          | I        | WD        | I                 |
| C*07:22                                                  | 07:22                  | HLA01844  |                                               | 1           | 0            | 445           | 3           | 4           | 0          | 15           | 468           |                                                      |          | I         |          |          |          | I        | I         | I                 |

| Supplemental Table 10: HLA-C Allele Summary <sup>a</sup> |                    |           | Allele Count by Population Group <sup>b</sup> |          |             |            |           |          |           |           |             | 3.0.0 CIWD Category by Population Group <sup>c</sup> |          |           |           |           |          |          |           |                   |
|----------------------------------------------------------|--------------------|-----------|-----------------------------------------------|----------|-------------|------------|-----------|----------|-----------|-----------|-------------|------------------------------------------------------|----------|-----------|-----------|-----------|----------|----------|-----------|-------------------|
| Allele                                                   | Genomic typing     | Allele ID | G group                                       | AFA      | API         | EURO       | MENA      | HIS      | NAM       | UNK       | Total       | AFA                                                  | API      | EURO      | MENA      | HIS       | NAM      | UNK      | Total     | Highest Frequency |
| C*07:24                                                  | 07:24              | HLA01864  |                                               | 2        | 2           | 62         | 0         | 0        | 0         | 13        | 79          |                                                      |          | WD        |           |           |          | WD       | WD        | WD                |
| C*07:25                                                  | 07:25              | HLA01877  |                                               | 0        | 4           | 186        | 0         | 2        | 1         | 17        | 210         |                                                      |          | I         |           |           |          | I        | I         | I                 |
| <b>C*07:26 total</b>                                     | <b>07:26 total</b> |           |                                               | <b>8</b> | <b>4280</b> | <b>28</b>  | <b>31</b> | <b>6</b> | <b>13</b> | <b>46</b> | <b>4412</b> | <b>WD</b>                                            | <b>C</b> | <b>WD</b> | <b>WD</b> | <b>WD</b> | <b>C</b> | <b>I</b> | <b>C</b>  | <b>C</b>          |
| C*07:26                                                  | 07:26              |           |                                               | 7        | 2061        | 14         | 27        | 5        | 10        | 30        | 2154        | WD                                                   | C        | WD        | WD        | WD        | C        | I        | C         | C                 |
| C*07:26:01                                               | 07:26:01           | HLA01889  |                                               | 1        | 2218        | 14         | 4         | 1        | 3         | 16        | 2257        |                                                      | C        | WD        |           |           |          | I        | C         | C                 |
| C*07:26:02                                               | 07:26:02           | HLA14534  |                                               | 0        | 1           | 0          | 0         | 0        | 0         | 0         | 1           |                                                      |          |           |           |           |          |          |           |                   |
| <b>C*07:27 total</b>                                     | <b>07:27 total</b> |           |                                               | <b>3</b> | <b>157</b>  | <b>203</b> | <b>60</b> | <b>8</b> | <b>1</b>  | <b>77</b> | <b>509</b>  |                                                      | <b>C</b> | <b>I</b>  | <b>C</b>  | <b>I</b>  |          | <b>I</b> | <b>I</b>  | <b>C</b>          |
| C*07:27                                                  | 07:27              |           |                                               | 0        | 5           | 54         | 0         | 1        | 0         | 7         | 67          |                                                      | WD       | WD        |           |           |          | WD       | WD        | WD                |
| C*07:27:01                                               | 07:27:01           | HLA01908  |                                               | 3        | 141         | 107        | 60        | 7        | 1         | 69        | 388         |                                                      | C        | WD        | C         | I         |          | I        | I         | C                 |
| C*07:27:02                                               | 07:27:02           | HLA03107  |                                               | 0        | 11          | 42         | 0         | 0        | 0         | 1         | 54          |                                                      | WD       | WD        |           |           |          |          | WD        | WD                |
| C*07:28                                                  | 07:28              | HLA01961  |                                               | 19       | 0           | 5          | 2         | 0        | 0         | 4         | 30          | WD                                                   |          | WD        |           |           |          |          | WD        | WD                |
| <b>C*07:29 total</b>                                     | <b>07:29 total</b> |           |                                               | <b>1</b> | <b>479</b>  | <b>45</b>  | <b>3</b>  | <b>0</b> | <b>1</b>  | <b>15</b> | <b>544</b>  |                                                      | <b>C</b> | <b>WD</b> |           |           |          | <b>I</b> | <b>I</b>  | <b>C</b>          |
| C*07:29                                                  | 07:29              |           |                                               | 0        | 280         | 27         | 2         | 0        | 1         | 11        | 321         |                                                      | C        | WD        |           |           |          | WD       | I         | C                 |
| C*07:29P                                                 | 07:29P             |           |                                               | 0        | 0           | 1          | 0         | 0        | 0         | 0         | 1           |                                                      |          |           |           |           |          |          |           |                   |
| C*07:29:01                                               | 07:29:01           | HLA02010  |                                               | 1        | 199         | 16         | 1         | 0        | 0         | 4         | 221         |                                                      | C        | WD        |           |           |          |          | I         | C                 |
| C*07:29:02                                               | 07:29:02           | HLA14023  |                                               | 0        | 0           | 1          | 0         | 0        | 0         | 0         | 1           |                                                      |          |           |           |           |          |          |           |                   |
| <b>C*07:31 total</b>                                     | <b>07:31 total</b> |           |                                               | <b>0</b> | <b>0</b>    | <b>20</b>  | <b>0</b>  | <b>0</b> | <b>0</b>  | <b>1</b>  | <b>21</b>   |                                                      |          | <b>WD</b> |           |           |          |          | <b>WD</b> | <b>WD</b>         |
| C*07:31                                                  | 07:31              |           |                                               | 0        | 0           | 2          | 0         | 0        | 0         | 0         | 2           |                                                      |          |           |           |           |          |          |           |                   |
| C*07:31:01                                               | 07:31:01           | HLA02205  |                                               | 0        | 0           | 14         | 0         | 0        | 0         | 1         | 15          |                                                      |          | WD        |           |           |          |          | WD        | WD                |
| C*07:31:02                                               | 07:31:02           | HLA08529  |                                               | 0        | 0           | 4          | 0         | 0        | 0         | 0         | 4           |                                                      |          |           |           |           |          |          |           |                   |
| C*07:32N                                                 | 07:32N             | HLA02354  |                                               | 0        | 0           | 87         | 0         | 1        | 0         | 9         | 97          |                                                      |          | WD        |           |           |          | WD       | WD        | WD                |
| C*07:33N                                                 | 07:33N             | HLA02380  |                                               | 0        | 0           | 14         | 0         | 0        | 0         | 3         | 17          |                                                      |          | WD        |           |           |          |          | WD        | WD                |
| C*07:35                                                  | 07:35              | HLA02425  |                                               | 71       | 0           | 1          | 0         | 12       | 3         | 15        | 102         | C                                                    |          |           |           | I         |          | I        | WD        | C                 |
| C*07:36                                                  | 07:36              | HLA02448  |                                               | 0        | 0           | 194        | 11        | 3        | 0         | 4         | 212         |                                                      |          | I         | WD        |           |          |          | I         | I                 |
| C*07:37                                                  | 07:37              | HLA02459  |                                               | 0        | 1           | 12         | 0         | 1        | 0         | 3         | 17          |                                                      |          | WD        |           |           |          |          | WD        | WD                |
| <b>C*07:38 total</b>                                     | <b>07:38 total</b> |           |                                               | <b>0</b> | <b>0</b>    | <b>37</b>  | <b>0</b>  | <b>0</b> | <b>0</b>  | <b>4</b>  | <b>41</b>   |                                                      |          | <b>WD</b> |           |           |          |          | <b>WD</b> | <b>WD</b>         |
| C*07:38                                                  | 07:38              |           |                                               | 0        | 0           | 6          | 0         | 0        | 0         | 1         | 7           |                                                      |          | WD        |           |           |          |          | WD        | WD                |
| C*07:38:01                                               | 07:38:01           | HLA02475  |                                               | 0        | 0           | 31         | 0         | 0        | 0         | 3         | 34          |                                                      |          | WD        |           |           |          |          | WD        | WD                |
| C*07:39                                                  | 07:39              | HLA02564  |                                               | 0        | 0           | 6          | 0         | 0        | 0         | 0         | 6           |                                                      |          | WD        |           |           |          |          | WD        | WD                |
| C*07:40                                                  | 07:40              | HLA02598  |                                               | 1        | 1           | 281        | 2         | 4        | 0         | 8         | 297         |                                                      |          | I         |           |           |          | WD       | I         | I                 |
| C*07:41                                                  | 07:41              | HLA02614  |                                               | 0        | 0           | 3          | 0         | 0        | 0         | 0         | 3           |                                                      |          |           |           |           |          |          |           |                   |



| Supplemental Table 10: HLA-C Allele Summary <sup>a</sup> |                    |           | Allele Count by Population Group <sup>b</sup> |     |     |      |      |     |     |     |       | 3.0.0 CIWD Category by Population Group <sup>c</sup> |     |      |      |     |     |     |       |                   |
|----------------------------------------------------------|--------------------|-----------|-----------------------------------------------|-----|-----|------|------|-----|-----|-----|-------|------------------------------------------------------|-----|------|------|-----|-----|-----|-------|-------------------|
| Allele                                                   | Genomic typing     | Allele ID | G group                                       | AFA | API | EURO | MENA | HIS | NAM | UNK | Total | AFA                                                  | API | EURO | MENA | HIS | NAM | UNK | Total | Highest Frequency |
| <b>C*07:43 total</b>                                     | <b>07:43 total</b> |           |                                               | 0   | 31  | 3    | 0    | 0   | 0   | 4   | 38    |                                                      | I   |      |      |     |     |     | WD    | I                 |
| C*07:43                                                  | 07:43              |           |                                               | 0   | 30  | 3    | 0    | 0   | 0   | 4   | 37    |                                                      | I   |      |      |     |     |     | WD    | I                 |
| C*07:43:01                                               | 07:43:01           | HLA02697  |                                               | 0   | 1   | 0    | 0    | 0   | 0   | 0   | 1     |                                                      |     |      |      |     |     |     |       |                   |
| C*07:44                                                  | 07:44              | HLA02709  |                                               | 0   | 0   | 5    | 0    | 0   | 0   | 2   | 7     |                                                      |     | WD   |      |     |     |     | WD    | WD                |
| C*07:45                                                  | 07:45              | HLA02730  |                                               | 0   | 0   | 2    | 0    | 0   | 0   | 0   | 2     |                                                      |     |      |      |     |     |     |       |                   |
| C*07:46                                                  | 07:46              | HLA02789  |                                               | 2   | 3   | 649  | 2    | 3   | 0   | 13  | 672   |                                                      |     | I    |      |     |     | WD  | I     | I                 |
| C*07:48                                                  | 07:48              | HLA02835  |                                               | 0   | 19  | 0    | 0    | 0   | 0   | 0   | 19    |                                                      | I   |      |      |     |     |     | WD    | I                 |
| C*07:49                                                  | 07:49              | HLA02943  |                                               | 0   | 1   | 48   | 1    | 0   | 1   | 1   | 52    |                                                      |     | WD   |      |     |     |     | WD    | WD                |
| C*07:51                                                  | 07:51              | HLA03013  |                                               | 1   | 6   | 76   | 3    | 3   | 0   | 12  | 101   |                                                      | WD  | WD   |      |     |     | WD  | WD    | WD                |
| C*07:53                                                  | 07:53              | HLA03139  |                                               | 0   | 0   | 3    | 0    | 0   | 0   | 0   | 3     |                                                      |     |      |      |     |     |     |       |                   |
| C*07:54                                                  | 07:54              | HLA03239  |                                               | 0   | 0   | 24   | 0    | 0   | 0   | 1   | 25    |                                                      |     | WD   |      |     |     |     | WD    | WD                |
| C*07:55N                                                 | 07:55N             | HLA03298  |                                               | 0   | 0   | 33   | 0    | 0   | 0   | 1   | 34    |                                                      |     | WD   |      |     |     |     | WD    | WD                |
| <b>C*07:56 total</b>                                     | <b>07:56 total</b> |           |                                               | 1   | 32  | 3    | 0    | 0   | 0   | 2   | 38    |                                                      | I   |      |      |     |     |     | WD    | I                 |
| C*07:56                                                  | 07:56              |           |                                               | 0   | 2   | 1    | 0    | 0   | 0   | 1   | 4     |                                                      |     |      |      |     |     |     |       |                   |
| C*07:56:01                                               | 07:56:01           | HLA03310  |                                               | 0   | 0   | 2    | 0    | 0   | 0   | 1   | 3     |                                                      |     |      |      |     |     |     |       |                   |
| C*07:56:02                                               | 07:56:02           | HLA03753  |                                               | 1   | 30  | 0    | 0    | 0   | 0   | 0   | 31    |                                                      | I   |      |      |     |     |     | WD    | I                 |
| C*07:57                                                  | 07:57              | HLA03365  |                                               | 0   | 0   | 16   | 2    | 1   | 0   | 0   | 19    |                                                      |     | WD   |      |     |     |     | WD    | WD                |
| C*07:60                                                  | 07:60              | HLA03436  |                                               | 0   | 0   | 215  | 2    | 1   | 0   | 4   | 222   |                                                      |     | I    |      |     |     |     | I     | I                 |
| C*07:61N                                                 | 07:61N             | HLA03439  |                                               | 6   | 0   | 1    | 0    | 3   | 4   | 4   | 18    | WD                                                   |     |      |      |     |     |     | WD    | WD                |
| C*07:63                                                  | 07:63              | HLA03477  |                                               | 0   | 16  | 0    | 0    | 0   | 0   | 2   | 18    |                                                      | I   |      |      |     |     |     | WD    | I                 |
| C*07:65                                                  | 07:65              | HLA03546  |                                               | 1   | 0   | 2    | 0    | 0   | 0   | 0   | 3     |                                                      |     |      |      |     |     |     |       |                   |
| C*07:67                                                  | 07:67              | HLA03623  |                                               | 0   | 3   | 0    | 0    | 0   | 0   | 0   | 3     |                                                      |     |      |      |     |     |     |       |                   |
| C*07:68                                                  | 07:68              | HLA03698  |                                               | 0   | 1   | 467  | 0    | 1   | 0   | 5   | 474   |                                                      |     | I    |      |     |     | WD  | I     | I                 |
| C*07:70                                                  | 07:70              | HLA03701  |                                               | 1   | 2   | 11   | 4    | 0   | 0   | 3   | 21    |                                                      |     | WD   |      |     |     |     | WD    | WD                |
| C*07:71                                                  | 07:71              | HLA03702  |                                               | 2   | 0   | 0    | 0    | 0   | 0   | 0   | 2     |                                                      |     |      |      |     |     |     |       |                   |
| C*07:72                                                  | 07:72              | HLA03703  |                                               | 0   | 0   | 28   | 0    | 0   | 0   | 7   | 35    |                                                      |     | WD   |      |     |     | WD  | WD    | WD                |
| C*07:73                                                  | 07:73              | HLA03819  |                                               | 0   | 0   | 7    | 0    | 0   | 0   | 1   | 8     |                                                      |     | WD   |      |     |     |     | WD    | WD                |
| C*07:75                                                  | 07:75              | HLA04021  |                                               | 0   | 1   | 8    | 0    | 0   | 0   | 0   | 9     |                                                      |     | WD   |      |     |     |     | WD    | WD                |
| <b>C*07:76 total</b>                                     | <b>07:76 total</b> |           |                                               | 0   | 1   | 13   | 4    | 1   | 0   | 0   | 19    |                                                      |     | WD   |      |     |     |     | WD    | WD                |
| C*07:76                                                  | 07:76              |           |                                               | 0   | 0   | 1    | 3    | 1   | 0   | 0   | 5     |                                                      |     |      |      |     |     |     | WD    | WD                |
| C*07:76:01                                               | 07:76:01           | HLA04130  |                                               | 0   | 1   | 5    | 1    | 0   | 0   | 0   | 7     |                                                      |     | WD   |      |     |     |     | WD    | WD                |

| Supplemental Table 10: HLA-C Allele Summary <sup>a</sup> |                    |           | Allele Count by Population Group <sup>b</sup> |          |          |           |          |          |          |          |           | 3.0.0 CIWD Category by Population Group <sup>c</sup> |     |           |      |     |     |     |           |                   |
|----------------------------------------------------------|--------------------|-----------|-----------------------------------------------|----------|----------|-----------|----------|----------|----------|----------|-----------|------------------------------------------------------|-----|-----------|------|-----|-----|-----|-----------|-------------------|
| Allele                                                   | Genomic typing     | Allele ID | G group                                       | AFA      | API      | EURO      | MENA     | HIS      | NAM      | UNK      | Total     | AFA                                                  | API | EURO      | MENA | HIS | NAM | UNK | Total     | Highest Frequency |
| C*07:76:02                                               | 07:76:02           | HLA11047  |                                               | 0        | 0        | 7         | 0        | 0        | 0        | 0        | 7         |                                                      |     | WD        |      |     |     |     | WD        | WD                |
| C*07:77                                                  | 07:77              | HLA04318  |                                               | 0        | 0        | 1         | 3        | 0        | 0        | 0        | 4         |                                                      |     |           |      |     |     |     |           |                   |
| <b>C*07:78 total</b>                                     | <b>07:78 total</b> |           |                                               | <b>0</b> | <b>0</b> | <b>2</b>  | <b>0</b> | <b>0</b> | <b>0</b> | <b>0</b> | <b>2</b>  |                                                      |     |           |      |     |     |     |           |                   |
| C*07:78:02                                               | 07:78:02           | HLA13517  |                                               | 0        | 0        | 2         | 0        | 0        | 0        | 0        | 2         |                                                      |     |           |      |     |     |     |           |                   |
| C*07:79                                                  | 07:79              | HLA04323  |                                               | 0        | 0        | 26        | 1        | 0        | 0        | 2        | 29        |                                                      |     | WD        |      |     |     |     | WD        | WD                |
| C*07:80                                                  | 07:80              | HLA04324  |                                               | 0        | 0        | 19        | 6        | 5        | 0        | 9        | 39        |                                                      |     | WD        | WD   | WD  |     | WD  | WD        | WD                |
| C*07:81                                                  | 07:81              | HLA04328  |                                               | 0        | 0        | 2         | 2        | 0        | 0        | 0        | 4         |                                                      |     |           |      |     |     |     |           |                   |
| C*07:82                                                  | 07:82              | HLA04329  |                                               | 0        | 0        | 3         | 1        | 0        | 0        | 0        | 4         |                                                      |     |           |      |     |     |     |           |                   |
| C*07:83                                                  | 07:83              | HLA04330  |                                               | 0        | 0        | 9         | 0        | 0        | 0        | 0        | 9         |                                                      |     | WD        |      |     |     |     | WD        | WD                |
| C*07:85                                                  | 07:85              | HLA04335  |                                               | 0        | 0        | 23        | 0        | 1        | 0        | 2        | 26        |                                                      |     | WD        |      |     |     |     | WD        | WD                |
| C*07:87                                                  | 07:87              | HLA04339  |                                               | 0        | 0        | 1         | 0        | 0        | 0        | 0        | 1         |                                                      |     |           |      |     |     |     |           |                   |
| C*07:88                                                  | 07:88              | HLA04342  |                                               | 0        | 0        | 5         | 0        | 0        | 0        | 0        | 5         |                                                      |     | WD        |      |     |     |     | WD        | WD                |
| C*07:89                                                  | 07:89              | HLA04343  |                                               | 0        | 2        | 4         | 0        | 0        | 0        | 0        | 6         |                                                      |     |           |      |     |     |     | WD        | WD                |
| C*07:90                                                  | 07:90              | HLA04347  |                                               | 0        | 0        | 9         | 0        | 0        | 1        | 2        | 12        |                                                      |     | WD        |      |     |     |     | WD        | WD                |
| C*07:91                                                  | 07:91              | HLA04348  |                                               | 0        | 0        | 41        | 0        | 0        | 0        | 0        | 41        |                                                      |     | WD        |      |     |     |     | WD        | WD                |
| C*07:92                                                  | 07:92              | HLA04396  |                                               | 0        | 0        | 17        | 0        | 0        | 0        | 3        | 20        |                                                      |     | WD        |      |     |     |     | WD        | WD                |
| C*07:93                                                  | 07:93              | HLA04399  |                                               | 0        | 0        | 58        | 31       | 1        | 0        | 10       | 100       |                                                      |     | WD        | WD   |     |     | WD  | WD        | WD                |
| C*07:95                                                  | 07:95              | HLA04594  |                                               | 0        | 0        | 34        | 0        | 1        | 0        | 2        | 37        |                                                      |     | WD        |      |     |     |     | WD        | WD                |
| <b>C*07:96 total</b>                                     | <b>07:96 total</b> |           |                                               | <b>0</b> | <b>0</b> | <b>23</b> | <b>0</b> | <b>0</b> | <b>0</b> | <b>1</b> | <b>24</b> |                                                      |     | <b>WD</b> |      |     |     |     | <b>WD</b> | <b>WD</b>         |
| C*07:96                                                  | 07:96              |           |                                               | 0        | 0        | 5         | 0        | 0        | 0        | 0        | 5         |                                                      |     | WD        |      |     |     |     | WD        | WD                |
| C*07:96:01                                               | 07:96:01           | HLA04597  |                                               | 0        | 0        | 18        | 0        | 0        | 0        | 1        | 19        |                                                      |     | WD        |      |     |     |     | WD        | WD                |
| C*07:97                                                  | 07:97              | HLA04601  |                                               | 0        | 0        | 7         | 0        | 0        | 0        | 0        | 7         |                                                      |     | WD        |      |     |     |     | WD        | WD                |
| C*07:98N                                                 | 07:98N             | HLA04607  |                                               | 0        | 0        | 1         | 0        | 0        | 0        | 0        | 1         |                                                      |     |           |      |     |     |     |           |                   |
| C*07:99                                                  | 07:99              | HLA04609  |                                               | 0        | 0        | 0         | 0        | 2        | 0        | 0        | 2         |                                                      |     |           |      |     |     |     |           |                   |
| C*07:100                                                 | 07:100             | HLA04974  |                                               | 0        | 0        | 9         | 0        | 0        | 0        | 0        | 9         |                                                      |     | WD        |      |     |     |     | WD        | WD                |
| C*07:101                                                 | 07:101             | HLA04982  |                                               | 0        | 0        | 42        | 0        | 0        | 0        | 1        | 43        |                                                      |     | WD        |      |     |     |     | WD        | WD                |
| C*07:102                                                 | 07:102             | HLA04983  |                                               | 0        | 0        | 5         | 0        | 0        | 0        | 0        | 5         |                                                      |     | WD        |      |     |     |     | WD        | WD                |
| C*07:103                                                 | 07:103             | HLA04995  |                                               | 0        | 0        | 1         | 0        | 0        | 0        | 0        | 1         |                                                      |     |           |      |     |     |     |           |                   |
| C*07:104N                                                | 07:104N            | HLA04996  |                                               | 0        | 0        | 25        | 0        | 1        | 0        | 3        | 29        |                                                      |     | WD        |      |     |     |     | WD        | WD                |
| C*07:105                                                 | 07:105             | HLA05012  |                                               | 0        | 0        | 6         | 0        | 0        | 0        | 0        | 6         |                                                      |     | WD        |      |     |     |     | WD        | WD                |
| C*07:106                                                 | 07:106             | HLA05013  |                                               | 0        | 0        | 34        | 0        | 0        | 0        | 1        | 35        |                                                      |     | WD        |      |     |     |     | WD        | WD                |

| Supplemental Table 10: HLA-C Allele Summary <sup>a</sup> |                     |           | Allele Count by Population Group <sup>b</sup> |     |     |      |      |     |     |     |       | 3.0.0 CIWD Category by Population Group <sup>c</sup> |     |      |      |     |     |     |       |                   |
|----------------------------------------------------------|---------------------|-----------|-----------------------------------------------|-----|-----|------|------|-----|-----|-----|-------|------------------------------------------------------|-----|------|------|-----|-----|-----|-------|-------------------|
| Allele                                                   | Genomic typing      | Allele ID | G group                                       | AFA | API | EURO | MENA | HIS | NAM | UNK | Total | AFA                                                  | API | EURO | MENA | HIS | NAM | UNK | Total | Highest Frequency |
| <b>C*07:108 total</b>                                    | <b>07:108 total</b> |           |                                               | 0   | 0   | 10   | 0    | 0   | 0   | 1   | 11    |                                                      |     | WD   |      |     |     |     | WD    | WD                |
| C*07:108:01                                              | 07:108:01           | HLA05015  |                                               | 0   | 0   | 6    | 0    | 0   | 0   | 0   | 6     |                                                      |     | WD   |      |     |     |     | WD    | WD                |
| C*07:108:02                                              | 07:108:02           | HLA10902  |                                               | 0   | 0   | 4    | 0    | 0   | 0   | 1   | 5     |                                                      |     |      |      |     |     |     | WD    | WD                |
| <b>C*07:109 total</b>                                    | <b>07:109 total</b> |           |                                               | 0   | 0   | 2    | 0    | 0   | 0   | 0   | 2     |                                                      |     |      |      |     |     |     |       |                   |
| C*07:109                                                 | 07:109              |           |                                               | 0   | 0   | 2    | 0    | 0   | 0   | 0   | 2     |                                                      |     |      |      |     |     |     |       |                   |
| C*07:110                                                 | 07:110              | HLA05017  |                                               | 0   | 0   | 1    | 1    | 0   | 0   | 0   | 2     |                                                      |     |      |      |     |     |     |       |                   |
| C*07:111                                                 | 07:111              | HLA05022  |                                               | 0   | 0   | 0    | 0    | 0   | 0   | 1   | 1     |                                                      |     |      |      |     |     |     |       |                   |
| C*07:112                                                 | 07:112              | HLA05023  |                                               | 5   | 0   | 0    | 0    | 1   | 0   | 3   | 9     | WD                                                   |     |      |      |     |     |     | WD    | WD                |
| C*07:113                                                 | 07:113              | HLA05024  |                                               | 0   | 0   | 1    | 0    | 0   | 0   | 0   | 1     |                                                      |     |      |      |     |     |     |       |                   |
| C*07:114                                                 | 07:114              | HLA05025  |                                               | 0   | 3   | 6    | 0    | 0   | 0   | 0   | 9     |                                                      |     | WD   |      |     |     |     | WD    | WD                |
| C*07:116                                                 | 07:116              | HLA05027  |                                               | 0   | 0   | 8    | 0    | 0   | 0   | 0   | 8     |                                                      |     | WD   |      |     |     |     | WD    | WD                |
| C*07:117                                                 | 07:117              | HLA05028  |                                               | 0   | 0   | 101  | 0    | 0   | 0   | 0   | 101   |                                                      |     | WD   |      |     |     |     | WD    | WD                |
| C*07:118                                                 | 07:118              | HLA05029  |                                               | 0   | 0   | 12   | 0    | 0   | 0   | 0   | 12    |                                                      |     | WD   |      |     |     |     | WD    | WD                |
| C*07:119                                                 | 07:119              | HLA05030  |                                               | 0   | 0   | 26   | 2    | 2   | 0   | 10  | 40    |                                                      |     | WD   |      |     |     | WD  | WD    | WD                |
| C*07:120                                                 | 07:120              | HLA05031  |                                               | 0   | 0   | 41   | 0    | 0   | 0   | 0   | 41    |                                                      |     | WD   |      |     |     |     | WD    | WD                |
| C*07:121Q                                                | 07:121Q             | HLA05032  |                                               | 0   | 0   | 7    | 0    | 0   | 0   | 0   | 7     |                                                      |     | WD   |      |     |     |     | WD    | WD                |
| C*07:122                                                 | 07:122              | HLA05033  |                                               | 0   | 0   | 6    | 0    | 0   | 0   | 0   | 6     |                                                      |     | WD   |      |     |     |     | WD    | WD                |
| C*07:123                                                 | 07:123              | HLA05034  |                                               | 0   | 0   | 3    | 0    | 1   | 0   | 1   | 5     |                                                      |     |      |      |     |     |     | WD    | WD                |
| C*07:124                                                 | 07:124              | HLA05035  |                                               | 0   | 0   | 19   | 0    | 0   | 0   | 13  | 32    |                                                      |     | WD   |      |     |     | WD  | WD    | WD                |
| C*07:125                                                 | 07:125              | HLA05036  |                                               | 0   | 0   | 1    | 0    | 0   | 0   | 0   | 1     |                                                      |     |      |      |     |     |     |       |                   |
| C*07:126                                                 | 07:126              | HLA05064  |                                               | 0   | 0   | 9    | 0    | 0   | 0   | 0   | 9     |                                                      |     | WD   |      |     |     |     | WD    | WD                |
| C*07:127                                                 | 07:127              | HLA05065  |                                               | 0   | 0   | 28   | 0    | 0   | 0   | 0   | 28    |                                                      |     | WD   |      |     |     |     | WD    | WD                |
| C*07:128                                                 | 07:128              | HLA05066  |                                               | 0   | 0   | 3    | 0    | 1   | 0   | 1   | 5     |                                                      |     |      |      |     |     |     | WD    | WD                |
| C*07:129                                                 | 07:129              | HLA05067  |                                               | 0   | 0   | 1    | 0    | 1   | 0   | 0   | 2     |                                                      |     |      |      |     |     |     |       |                   |
| C*07:130                                                 | 07:130              | HLA05068  |                                               | 0   | 5   | 6    | 0    | 0   | 0   | 0   | 11    |                                                      | WD  | WD   |      |     |     |     | WD    | WD                |
| <b>C*07:131 total</b>                                    | <b>07:131 total</b> |           |                                               | 0   | 0   | 2    | 0    | 0   | 0   | 0   | 2     |                                                      |     |      |      |     |     |     |       |                   |
| C*07:131                                                 | 07:131              |           |                                               | 0   | 0   | 2    | 0    | 0   | 0   | 0   | 2     |                                                      |     |      |      |     |     |     |       |                   |
| C*07:132                                                 | 07:132              | HLA05070  |                                               | 0   | 0   | 2    | 0    | 0   | 0   | 0   | 2     |                                                      |     |      |      |     |     |     |       |                   |
| C*07:133                                                 | 07:133              | HLA05071  |                                               | 0   | 0   | 4    | 0    | 0   | 0   | 0   | 4     |                                                      |     |      |      |     |     |     |       |                   |
| C*07:134                                                 | 07:134              | HLA05072  |                                               | 0   | 0   | 3    | 0    | 0   | 0   | 0   | 3     |                                                      |     |      |      |     |     |     |       |                   |
| C*07:135                                                 | 07:135              | HLA05073  |                                               | 0   | 0   | 1    | 0    | 0   | 0   | 0   | 1     |                                                      |     |      |      |     |     |     |       |                   |

| Supplemental Table 10: HLA-C Allele Summary <sup>a</sup> |                     |           | Allele Count by Population Group <sup>b</sup> |     |     |      |      |     |     |     |       | 3.0.0 CIWD Category by Population Group <sup>c</sup> |     |      |      |     |     |     |       |                   |
|----------------------------------------------------------|---------------------|-----------|-----------------------------------------------|-----|-----|------|------|-----|-----|-----|-------|------------------------------------------------------|-----|------|------|-----|-----|-----|-------|-------------------|
| Allele                                                   | Genomic typing      | Allele ID | G group                                       | AFA | API | EURO | MENA | HIS | NAM | UNK | Total | AFA                                                  | API | EURO | MENA | HIS | NAM | UNK | Total | Highest Frequency |
| <b>C*07:137 total</b>                                    | <b>07:137 total</b> |           |                                               | 0   | 0   | 36   | 0    | 3   | 0   | 0   | 39    |                                                      |     | WD   |      |     |     |     | WD    | WD                |
| C*07:137                                                 | 07:137              |           |                                               | 0   | 0   | 1    | 0    | 0   | 0   | 0   | 1     |                                                      |     |      |      |     |     |     |       |                   |
| C*07:137:01                                              | 07:137:01           | HLA05075  |                                               | 0   | 0   | 1    | 0    | 0   | 0   | 0   | 1     |                                                      |     |      |      |     |     |     |       |                   |
| C*07:137:02                                              | 07:137:02           | HLA05855  |                                               | 0   | 0   | 34   | 0    | 3   | 0   | 0   | 37    |                                                      |     | WD   |      |     |     |     | WD    | WD                |
| C*07:138                                                 | 07:138              | HLA05076  |                                               | 0   | 0   | 17   | 0    | 2   | 0   | 1   | 20    |                                                      |     | WD   |      |     |     |     | WD    | WD                |
| C*07:139                                                 | 07:139              | HLA05077  |                                               | 0   | 0   | 3    | 0    | 0   | 0   | 0   | 3     |                                                      |     |      |      |     |     |     |       |                   |
| C*07:140                                                 | 07:140              | HLA05089  |                                               | 0   | 0   | 2    | 0    | 0   | 0   | 0   | 2     |                                                      |     |      |      |     |     |     |       |                   |
| <b>C*07:141 total</b>                                    | <b>07:141 total</b> |           |                                               | 2   | 0   | 4    | 2    | 1   | 0   | 1   | 10    |                                                      |     |      |      |     |     |     | WD    | WD                |
| C*07:141:01                                              | 07:141:01           | HLA05090  |                                               | 1   | 0   | 0    | 0    | 0   | 0   | 0   | 1     |                                                      |     |      |      |     |     |     |       |                   |
| C*07:141:02                                              | 07:141:02           | HLA07835  |                                               | 1   | 0   | 4    | 2    | 1   | 0   | 1   | 9     |                                                      |     |      |      |     |     |     | WD    | WD                |
| C*07:142                                                 | 07:142              | HLA05079  |                                               | 0   | 0   | 2    | 0    | 0   | 0   | 0   | 2     |                                                      |     |      |      |     |     |     |       |                   |
| C*07:143                                                 | 07:143              | HLA05080  |                                               | 0   | 0   | 10   | 0    | 0   | 0   | 0   | 10    |                                                      |     | WD   |      |     |     |     | WD    | WD                |
| C*07:145                                                 | 07:145              | HLA05082  |                                               | 0   | 0   | 3    | 0    | 0   | 0   | 0   | 3     |                                                      |     |      |      |     |     |     |       |                   |
| C*07:146                                                 | 07:146              | HLA05083  |                                               | 0   | 0   | 1    | 0    | 0   | 0   | 0   | 1     |                                                      |     |      |      |     |     |     |       |                   |
| C*07:147                                                 | 07:147              | HLA05138  |                                               | 0   | 0   | 38   | 0    | 0   | 0   | 0   | 38    |                                                      |     | WD   |      |     |     |     | WD    | WD                |
| C*07:148                                                 | 07:148              | HLA05221  |                                               | 0   | 1   | 12   | 0    | 0   | 0   | 0   | 13    |                                                      |     | WD   |      |     |     |     | WD    | WD                |
| C*07:149                                                 | 07:149              | HLA05419  |                                               | 0   | 0   | 8    | 0    | 0   | 0   | 0   | 8     |                                                      |     | WD   |      |     |     |     | WD    | WD                |
| C*07:150Q                                                | 07:150Q             | HLA05544  |                                               | 0   | 0   | 0    | 0    | 0   | 0   | 1   | 1     |                                                      |     |      |      |     |     |     |       |                   |
| C*07:151                                                 | 07:151              | HLA05554  |                                               | 0   | 0   | 8    | 0    | 0   | 0   | 2   | 10    |                                                      |     | WD   |      |     |     |     | WD    | WD                |
| C*07:154                                                 | 07:154              | HLA05780  |                                               | 0   | 6   | 0    | 0    | 0   | 0   | 1   | 7     |                                                      | WD  |      |      |     |     |     | WD    | WD                |
| C*07:155                                                 | 07:155              | HLA05820  |                                               | 0   | 0   | 17   | 3    | 1   | 2   | 3   | 26    |                                                      |     | WD   |      |     |     |     | WD    | WD                |
| C*07:163                                                 | 07:163              | HLA06048  |                                               | 0   | 0   | 1    | 0    | 0   | 0   | 0   | 1     |                                                      |     |      |      |     |     |     |       |                   |
| C*07:165                                                 | 07:165              | HLA06070  |                                               | 0   | 4   | 6    | 0    | 0   | 0   | 0   | 10    |                                                      |     | WD   |      |     |     |     | WD    | WD                |
| C*07:168                                                 | 07:168              | HLA06170  |                                               | 0   | 0   | 1    | 0    | 0   | 0   | 0   | 1     |                                                      |     |      |      |     |     |     |       |                   |
| C*07:169                                                 | 07:169              | HLA06171  |                                               | 0   | 1   | 0    | 0    | 0   | 0   | 0   | 1     |                                                      |     |      |      |     |     |     |       |                   |
| C*07:170                                                 | 07:170              | HLA06277  |                                               | 0   | 0   | 1    | 0    | 1   | 0   | 0   | 2     |                                                      |     |      |      |     |     |     |       |                   |
| C*07:171                                                 | 07:171              | HLA06306  |                                               | 0   | 0   | 1    | 1    | 0   | 0   | 0   | 2     |                                                      |     |      |      |     |     |     |       |                   |
| <b>C*07:172 total</b>                                    | <b>07:172 total</b> |           |                                               | 0   | 1   | 16   | 0    | 3   | 0   | 0   | 20    |                                                      |     | WD   |      |     |     |     | WD    | WD                |
| C*07:172                                                 | 07:172              |           |                                               | 0   | 0   | 9    | 0    | 3   | 0   | 0   | 12    |                                                      |     | WD   |      |     |     |     | WD    | WD                |
| C*07:172:01                                              | 07:172:01           | HLA06387  |                                               | 0   | 1   | 7    | 0    | 0   | 0   | 0   | 8     |                                                      |     | WD   |      |     |     |     | WD    | WD                |
| C*07:173                                                 | 07:173              | HLA06389  |                                               | 6   | 0   | 27   | 0    | 1   | 0   | 1   | 35    | WD                                                   |     | WD   |      |     |     |     | WD    | WD                |

| Supplemental Table 10: HLA-C Allele Summary <sup>a</sup> |                     |           | Allele Count by Population Group <sup>b</sup> |          |          |          |          |          |          |          |           |     | 3.0.0 CIWD Category by Population Group <sup>c</sup> |           |      |     |     |     |           |                   |
|----------------------------------------------------------|---------------------|-----------|-----------------------------------------------|----------|----------|----------|----------|----------|----------|----------|-----------|-----|------------------------------------------------------|-----------|------|-----|-----|-----|-----------|-------------------|
| Allele                                                   | Genomic typing      | Allele ID | G group                                       | AFA      | API      | EURO     | MENA     | HIS      | NAM      | UNK      | Total     | AFA | API                                                  | EURO      | MENA | HIS | NAM | UNK | Total     | Highest Frequency |
| C*07:175                                                 | 07:175              | HLA06392  |                                               | 0        | 0        | 1        | 0        | 0        | 0        | 0        | 1         |     |                                                      |           |      |     |     |     |           |                   |
| C*07:176                                                 | 07:176              | HLA06408  |                                               | 0        | 0        | 1        | 0        | 0        | 0        | 0        | 1         |     |                                                      |           |      |     |     |     |           |                   |
| C*07:177                                                 | 07:177              | HLA06409  |                                               | 0        | 0        | 2        | 0        | 0        | 0        | 1        | 3         |     |                                                      |           |      |     |     |     |           |                   |
| C*07:178                                                 | 07:178              | HLA06410  |                                               | 0        | 0        | 2        | 0        | 0        | 0        | 0        | 2         |     |                                                      |           |      |     |     |     |           |                   |
| C*07:179                                                 | 07:179              | HLA06423  |                                               | 0        | 0        | 16       | 0        | 0        | 0        | 0        | 16        |     |                                                      | WD        |      |     |     |     | WD        | WD                |
| C*07:180                                                 | 07:180              | HLA06425  |                                               | 0        | 0        | 13       | 0        | 0        | 0        | 0        | 13        |     |                                                      | WD        |      |     |     |     | WD        | WD                |
| C*07:181                                                 | 07:181              | HLA06429  |                                               | 0        | 0        | 4        | 0        | 0        | 0        | 1        | 5         |     |                                                      |           |      |     |     |     | WD        | WD                |
| C*07:182                                                 | 07:182              | HLA06430  |                                               | 1        | 0        | 0        | 0        | 0        | 0        | 0        | 1         |     |                                                      |           |      |     |     |     |           |                   |
| C*07:184                                                 | 07:184              | HLA06449  |                                               | 6        | 0        | 0        | 0        | 0        | 0        | 2        | 8         | WD  |                                                      |           |      |     |     |     | WD        | WD                |
| C*07:185                                                 | 07:185              | HLA06525  |                                               | 0        | 0        | 4        | 0        | 0        | 0        | 0        | 4         |     |                                                      |           |      |     |     |     |           |                   |
| C*07:186                                                 | 07:186              | HLA06655  |                                               | 0        | 0        | 0        | 0        | 0        | 1        | 1        | 2         |     |                                                      |           |      |     |     |     |           |                   |
| C*07:189                                                 | 07:189              | HLA06706  |                                               | 0        | 0        | 1        | 0        | 0        | 0        | 0        | 1         |     |                                                      |           |      |     |     |     |           |                   |
| C*07:191N                                                | 07:191N             | HLA06717  |                                               | 0        | 0        | 2        | 0        | 0        | 0        | 0        | 2         |     |                                                      |           |      |     |     |     |           |                   |
| C*07:192                                                 | 07:192              | HLA06719  |                                               | 0        | 0        | 11       | 0        | 0        | 0        | 1        | 12        |     |                                                      | WD        |      |     |     |     | WD        | WD                |
| C*07:194                                                 | 07:194              | HLA06735  |                                               | 0        | 0        | 3        | 0        | 0        | 0        | 0        | 3         |     |                                                      |           |      |     |     |     |           |                   |
| C*07:196                                                 | 07:196              | HLA06896  |                                               | 0        | 0        | 4        | 0        | 1        | 0        | 1        | 6         |     |                                                      |           |      |     |     |     | WD        | WD                |
| C*07:198N                                                | 07:198N             | HLA07051  |                                               | 0        | 0        | 0        | 0        | 4        | 0        | 1        | 5         |     |                                                      |           |      |     |     |     | WD        | WD                |
| <b>C*07:199 total</b>                                    | <b>07:199 total</b> |           |                                               | <b>0</b> | <b>8</b> | <b>6</b> | <b>0</b> | <b>0</b> | <b>0</b> | <b>0</b> | <b>14</b> |     | <b>WD</b>                                            | <b>WD</b> |      |     |     |     | <b>WD</b> | <b>WD</b>         |
| C*07:199:01                                              | 07:199:01           | HLA07057  |                                               | 0        | 8        | 1        | 0        | 0        | 0        | 0        | 9         |     | WD                                                   |           |      |     |     |     | WD        | WD                |
| C*07:199:02                                              | 07:199:02           | HLA08183  |                                               | 0        | 0        | 5        | 0        | 0        | 0        | 0        | 5         |     |                                                      | WD        |      |     |     |     | WD        | WD                |
| C*07:200                                                 | 07:200              | HLA07058  |                                               | 0        | 0        | 0        | 0        | 0        | 0        | 2        | 2         |     |                                                      |           |      |     |     |     |           |                   |
| C*07:201                                                 | 07:201              | HLA07059  |                                               | 0        | 0        | 2        | 0        | 0        | 0        | 0        | 2         |     |                                                      |           |      |     |     |     |           |                   |
| C*07:202                                                 | 07:202              | HLA07070  |                                               | 0        | 0        | 0        | 1        | 0        | 0        | 0        | 1         |     |                                                      |           |      |     |     |     |           |                   |
| <b>C*07:204 total</b>                                    | <b>07:204 total</b> |           |                                               | <b>0</b> | <b>0</b> | <b>2</b> | <b>0</b> | <b>0</b> | <b>0</b> | <b>1</b> | <b>3</b>  |     |                                                      |           |      |     |     |     |           |                   |
| C*07:204P                                                | 07:204P             |           |                                               | 0        | 0        | 0        | 0        | 0        | 0        | 1        | 1         |     |                                                      |           |      |     |     |     |           |                   |
| C*07:204:01                                              | 07:204:01           | HLA07072  |                                               | 0        | 0        | 2        | 0        | 0        | 0        | 0        | 2         |     |                                                      |           |      |     |     |     |           |                   |
| C*07:205                                                 | 07:205              | HLA07078  |                                               | 0        | 0        | 19       | 0        | 0        | 0        | 0        | 19        |     |                                                      | WD        |      |     |     |     | WD        | WD                |
| C*07:206                                                 | 07:206              | HLA07079  |                                               | 0        | 0        | 8        | 0        | 3        | 0        | 1        | 12        |     |                                                      | WD        |      |     |     |     | WD        | WD                |
| C*07:207                                                 | 07:207              | HLA07081  |                                               | 0        | 0        | 4        | 0        | 0        | 0        | 0        | 4         |     |                                                      |           |      |     |     |     |           |                   |
| C*07:209                                                 | 07:209              | HLA07130  |                                               | 0        | 0        | 6        | 0        | 0        | 0        | 0        | 6         |     |                                                      | WD        |      |     |     |     | WD        | WD                |
| C*07:211                                                 | 07:211              | HLA07133  |                                               | 0        | 4        | 0        | 0        | 0        | 0        | 0        | 4         |     |                                                      |           |      |     |     |     |           |                   |

| Supplemental Table 10: HLA-C Allele Summary <sup>a</sup> |                     |           | Allele Count by Population Group <sup>b</sup> |          |          |          |          |          |          |          |          | 3.0.0 CIWD Category by Population Group <sup>c</sup> |     |      |      |     |     |     |       |                   |
|----------------------------------------------------------|---------------------|-----------|-----------------------------------------------|----------|----------|----------|----------|----------|----------|----------|----------|------------------------------------------------------|-----|------|------|-----|-----|-----|-------|-------------------|
| Allele                                                   | Genomic typing      | Allele ID | G group                                       | AFA      | API      | EURO     | MENA     | HIS      | NAM      | UNK      | Total    | AFA                                                  | API | EURO | MENA | HIS | NAM | UNK | Total | Highest Frequency |
| C*07:212                                                 | 07:212              | HLA07182  |                                               | 1        | 3        | 8        | 0        | 1        | 0        | 3        | 16       |                                                      |     | WD   |      |     |     |     | WD    | WD                |
| C*07:213                                                 | 07:213              | HLA07215  |                                               | 0        | 0        | 0        | 0        | 1        | 0        | 0        | 1        |                                                      |     |      |      |     |     |     |       |                   |
| C*07:214                                                 | 07:214              | HLA07217  |                                               | 0        | 0        | 5        | 0        | 0        | 0        | 0        | 5        |                                                      |     | WD   |      |     |     |     | WD    | WD                |
| C*07:215                                                 | 07:215              | HLA07218  |                                               | 0        | 0        | 1        | 0        | 0        | 0        | 0        | 1        |                                                      |     |      |      |     |     |     |       |                   |
| C*07:216                                                 | 07:216              | HLA07219  |                                               | 0        | 0        | 4        | 0        | 0        | 0        | 0        | 4        |                                                      |     |      |      |     |     |     |       |                   |
| C*07:218                                                 | 07:218              | HLA07221  |                                               | 1        | 2        | 10       | 0        | 0        | 0        | 1        | 14       |                                                      |     | WD   |      |     |     |     | WD    | WD                |
| C*07:222                                                 | 07:222              | HLA07477  |                                               | 0        | 0        | 5        | 0        | 0        | 0        | 0        | 5        |                                                      |     | WD   |      |     |     |     | WD    | WD                |
| C*07:223                                                 | 07:223              | HLA07481  |                                               | 0        | 1        | 4        | 0        | 0        | 0        | 1        | 6        |                                                      |     |      |      |     |     |     | WD    | WD                |
| C*07:224                                                 | 07:224              | HLA07482  |                                               | 0        | 3        | 2        | 0        | 0        | 0        | 0        | 5        |                                                      |     |      |      |     |     |     | WD    | WD                |
| C*07:226                                                 | 07:226              | HLA07484  |                                               | 0        | 0        | 1        | 0        | 0        | 0        | 0        | 1        |                                                      |     |      |      |     |     |     |       |                   |
| C*07:227N                                                | 07:227N             | HLA07486  |                                               | 0        | 0        | 4        | 0        | 1        | 0        | 0        | 5        |                                                      |     |      |      |     |     |     | WD    | WD                |
| C*07:229                                                 | 07:229              | HLA07734  |                                               | 0        | 1        | 2        | 0        | 1        | 0        | 0        | 4        |                                                      |     |      |      |     |     |     |       |                   |
| C*07:231                                                 | 07:231              | HLA07736  |                                               | 0        | 2        | 0        | 0        | 0        | 0        | 0        | 2        |                                                      |     |      |      |     |     |     |       |                   |
| C*07:232                                                 | 07:232              | HLA07737  |                                               | 0        | 14       | 0        | 0        | 0        | 0        | 0        | 14       |                                                      | I   |      |      |     |     |     | WD    | I                 |
| C*07:234                                                 | 07:234              | HLA07739  |                                               | 0        | 0        | 6        | 0        | 0        | 0        | 2        | 8        |                                                      |     | WD   |      |     |     |     | WD    | WD                |
| C*07:238                                                 | 07:238              | HLA07837  |                                               | 0        | 0        | 3        | 0        | 0        | 0        | 0        | 3        |                                                      |     |      |      |     |     |     |       |                   |
| C*07:240                                                 | 07:240              | HLA07839  |                                               | 0        | 0        | 1        | 0        | 0        | 0        | 0        | 1        |                                                      |     |      |      |     |     |     |       |                   |
| C*07:241                                                 | 07:241              | HLA07840  |                                               | 0        | 2        | 7        | 0        | 1        | 0        | 1        | 11       |                                                      |     | WD   |      |     |     |     | WD    | WD                |
| C*07:242                                                 | 07:242              | HLA07842  |                                               | 0        | 0        | 13       | 0        | 0        | 0        | 0        | 13       |                                                      |     | WD   |      |     |     |     | WD    | WD                |
| C*07:243                                                 | 07:243              | HLA07843  |                                               | 0        | 0        | 3        | 3        | 0        | 0        | 0        | 6        |                                                      |     |      |      |     |     |     | WD    | WD                |
| C*07:244                                                 | 07:244              | HLA07930  |                                               | 0        | 0        | 0        | 0        | 0        | 0        | 1        | 1        |                                                      |     |      |      |     |     |     |       |                   |
| <b>C*07:246 total</b>                                    | <b>07:246 total</b> |           |                                               | <b>0</b> | <b>1</b> | <b>0</b> | <b>0</b> | <b>0</b> | <b>0</b> | <b>0</b> | <b>1</b> |                                                      |     |      |      |     |     |     |       |                   |
| C*07:246                                                 | 07:246              |           |                                               | 0        | 1        | 0        | 0        | 0        | 0        | 0        | 1        |                                                      |     |      |      |     |     |     |       |                   |
| C*07:247                                                 | 07:247              | HLA08150  |                                               | 0        | 1        | 4        | 0        | 0        | 0        | 0        | 5        |                                                      |     |      |      |     |     |     | WD    | WD                |
| C*07:248                                                 | 07:248              | HLA08151  |                                               | 0        | 1        | 2        | 0        | 0        | 0        | 0        | 3        |                                                      |     |      |      |     |     |     |       |                   |
| C*07:249                                                 | 07:249              | HLA08152  |                                               | 0        | 0        | 3        | 0        | 0        | 0        | 0        | 3        |                                                      |     |      |      |     |     |     |       |                   |
| C*07:250                                                 | 07:250              | HLA08153  |                                               | 0        | 0        | 13       | 0        | 0        | 0        | 1        | 14       |                                                      |     | WD   |      |     |     |     | WD    | WD                |
| C*07:252                                                 | 07:252              | HLA08180  |                                               | 0        | 0        | 10       | 0        | 0        | 0        | 1        | 11       |                                                      |     | WD   |      |     |     |     | WD    | WD                |
| C*07:254                                                 | 07:254              | HLA08186  |                                               | 0        | 0        | 2        | 0        | 0        | 0        | 1        | 3        |                                                      |     |      |      |     |     |     |       |                   |
| C*07:255                                                 | 07:255              | HLA08187  |                                               | 1        | 0        | 2        | 0        | 0        | 0        | 0        | 3        |                                                      |     |      |      |     |     |     |       |                   |
| C*07:256                                                 | 07:256              | HLA08188  |                                               | 0        | 0        | 6        | 0        | 0        | 0        | 0        | 6        |                                                      |     | WD   |      |     |     |     | WD    | WD                |

| Supplemental Table 10: HLA-C Allele Summary <sup>a</sup> |                     |           | Allele Count by Population Group <sup>b</sup> |     |     |      |      |     |     |     |       | 3.0.0 CIWD Category by Population Group <sup>c</sup> |     |      |      |     |     |     |       |                   |
|----------------------------------------------------------|---------------------|-----------|-----------------------------------------------|-----|-----|------|------|-----|-----|-----|-------|------------------------------------------------------|-----|------|------|-----|-----|-----|-------|-------------------|
| Allele                                                   | Genomic typing      | Allele ID | G group                                       | AFA | API | EURO | MENA | HIS | NAM | UNK | Total | AFA                                                  | API | EURO | MENA | HIS | NAM | UNK | Total | Highest Frequency |
| <b>C*07:257 total</b>                                    | <b>07:257 total</b> |           |                                               | 1   | 0   | 6    | 0    | 0   | 0   | 0   | 7     |                                                      |     | WD   |      |     |     |     | WD    | WD                |
| C*07:257                                                 | 07:257              |           |                                               | 0   | 0   | 3    | 0    | 0   | 0   | 0   | 3     |                                                      |     |      |      |     |     |     |       |                   |
| C*07:257:01                                              | 07:257:01           | HLA08189  |                                               | 0   | 0   | 1    | 0    | 0   | 0   | 0   | 1     |                                                      |     |      |      |     |     |     |       |                   |
| C*07:257:02                                              | 07:257:02           | HLA12669  |                                               | 0   | 0   | 1    | 0    | 0   | 0   | 0   | 1     |                                                      |     |      |      |     |     |     |       |                   |
| C*07:257:03                                              | 07:257:03           | HLA13039  |                                               | 0   | 0   | 1    | 0    | 0   | 0   | 0   | 1     |                                                      |     |      |      |     |     |     |       |                   |
| C*07:257:04                                              | 07:257:04           | HLA14324  |                                               | 1   | 0   | 0    | 0    | 0   | 0   | 0   | 1     |                                                      |     |      |      |     |     |     |       |                   |
| C*07:258                                                 | 07:258              | HLA08190  |                                               | 0   | 0   | 1    | 0    | 0   | 0   | 0   | 1     |                                                      |     |      |      |     |     |     |       |                   |
| C*07:259                                                 | 07:259              | HLA08191  |                                               | 0   | 0   | 2    | 0    | 0   | 0   | 0   | 2     |                                                      |     |      |      |     |     |     |       |                   |
| <b>C*07:260 total</b>                                    | <b>07:260 total</b> |           |                                               | 0   | 0   | 0    | 0    | 1   | 0   | 0   | 1     |                                                      |     |      |      |     |     |     |       |                   |
| C*07:260                                                 | 07:260              |           |                                               | 0   | 0   | 0    | 0    | 1   | 0   | 0   | 1     |                                                      |     |      |      |     |     |     |       |                   |
| C*07:261                                                 | 07:261              | HLA08193  |                                               | 0   | 2   | 5    | 0    | 0   | 0   | 0   | 7     |                                                      |     | WD   |      |     |     |     | WD    | WD                |
| C*07:262                                                 | 07:262              | HLA08195  |                                               | 0   | 0   | 10   | 0    | 1   | 0   | 1   | 12    |                                                      |     | WD   |      |     |     |     | WD    | WD                |
| C*07:264N                                                | 07:264N             | HLA08402  |                                               | 0   | 0   | 0    | 0    | 3   | 0   | 0   | 3     |                                                      |     |      |      |     |     |     |       |                   |
| C*07:266                                                 | 07:266              | HLA08474  |                                               | 0   | 0   | 0    | 0    | 0   | 0   | 1   | 1     |                                                      |     |      |      |     |     |     |       |                   |
| C*07:269                                                 | 07:269              | HLA08527  |                                               | 0   | 0   | 1    | 0    | 0   | 0   | 0   | 1     |                                                      |     |      |      |     |     |     |       |                   |
| C*07:273                                                 | 07:273              | HLA08691  |                                               | 0   | 0   | 3    | 0    | 0   | 0   | 0   | 3     |                                                      |     |      |      |     |     |     |       |                   |
| C*07:276                                                 | 07:276              | HLA08704  |                                               | 0   | 0   | 3    | 0    | 0   | 0   | 0   | 3     |                                                      |     |      |      |     |     |     |       |                   |
| C*07:278                                                 | 07:278              | HLA08706  |                                               | 0   | 0   | 1    | 0    | 0   | 0   | 0   | 1     |                                                      |     |      |      |     |     |     |       |                   |
| C*07:279                                                 | 07:279              | HLA08707  |                                               | 0   | 0   | 5    | 0    | 0   | 0   | 0   | 5     |                                                      |     | WD   |      |     |     |     | WD    | WD                |
| C*07:280                                                 | 07:280              | HLA08708  |                                               | 0   | 0   | 2    | 0    | 0   | 0   | 0   | 2     |                                                      |     |      |      |     |     |     |       |                   |
| C*07:283                                                 | 07:283              | HLA08714  |                                               | 0   | 0   | 1    | 0    | 0   | 0   | 0   | 1     |                                                      |     |      |      |     |     |     |       |                   |
| C*07:285                                                 | 07:285              | HLA08716  |                                               | 0   | 0   | 12   | 0    | 0   | 0   | 0   | 12    |                                                      |     | WD   |      |     |     |     | WD    | WD                |
| C*07:286                                                 | 07:286              | HLA08717  |                                               | 0   | 0   | 1    | 0    | 0   | 0   | 0   | 1     |                                                      |     |      |      |     |     |     |       |                   |
| C*07:287                                                 | 07:287              | HLA08718  |                                               | 0   | 0   | 8    | 0    | 0   | 0   | 1   | 9     |                                                      |     | WD   |      |     |     |     | WD    | WD                |
| C*07:288                                                 | 07:288              | HLA08719  |                                               | 0   | 0   | 0    | 0    | 0   | 0   | 1   | 1     |                                                      |     |      |      |     |     |     |       |                   |
| C*07:289                                                 | 07:289              | HLA08723  |                                               | 0   | 1   | 0    | 0    | 0   | 0   | 0   | 1     |                                                      |     |      |      |     |     |     |       |                   |
| C*07:292                                                 | 07:292              | HLA08726  |                                               | 0   | 0   | 3    | 0    | 0   | 0   | 0   | 3     |                                                      |     |      |      |     |     |     |       |                   |
| C*07:293                                                 | 07:293              | HLA08833  |                                               | 0   | 0   | 2    | 0    | 3   | 0   | 2   | 7     |                                                      |     |      |      |     |     |     | WD    | WD                |
| C*07:294                                                 | 07:294              | HLA08897  |                                               | 0   | 0   | 1    | 0    | 0   | 0   | 0   | 1     |                                                      |     |      |      |     |     |     |       |                   |
| C*07:296                                                 | 07:296              | HLA09013  |                                               | 0   | 0   | 2    | 0    | 0   | 0   | 0   | 2     |                                                      |     |      |      |     |     |     |       |                   |
| C*07:298                                                 | 07:298              | HLA09019  |                                               | 0   | 0   | 5    | 0    | 0   | 0   | 1   | 6     |                                                      |     | WD   |      |     |     |     | WD    | WD                |

| Supplemental Table 10: HLA-C Allele Summary <sup>a</sup> |                     |           | Allele Count by Population Group <sup>b</sup> |          |          |          |          |          |          |          |          |     | 3.0.0 CIWD Category by Population Group <sup>c</sup> |      |      |     |     |     |           |                   |
|----------------------------------------------------------|---------------------|-----------|-----------------------------------------------|----------|----------|----------|----------|----------|----------|----------|----------|-----|------------------------------------------------------|------|------|-----|-----|-----|-----------|-------------------|
| Allele                                                   | Genomic typing      | Allele ID | G group                                       | AFA      | API      | EURO     | MENA     | HIS      | NAM      | UNK      | Total    | AFA | API                                                  | EURO | MENA | HIS | NAM | UNK | Total     | Highest Frequency |
| C*07:301                                                 | 07:301              | HLA09178  |                                               | 0        | 0        | 15       | 0        | 0        | 0        | 1        | 16       |     |                                                      | WD   |      |     |     |     | WD        | WD                |
| C*07:303                                                 | 07:303              | HLA09184  |                                               | 0        | 0        | 6        | 0        | 0        | 0        | 0        | 6        |     |                                                      | WD   |      |     |     |     | WD        | WD                |
| C*07:304                                                 | 07:304              | HLA09185  |                                               | 0        | 0        | 1        | 0        | 1        | 0        | 0        | 2        |     |                                                      |      |      |     |     |     |           |                   |
| C*07:306                                                 | 07:306              | HLA09188  |                                               | 0        | 0        | 2        | 0        | 0        | 0        | 0        | 2        |     |                                                      |      |      |     |     |     |           |                   |
| C*07:307                                                 | 07:307              | HLA09451  |                                               | 0        | 3        | 1        | 0        | 0        | 0        | 0        | 4        |     |                                                      |      |      |     |     |     |           |                   |
| C*07:309                                                 | 07:309              | HLA09598  |                                               | 0        | 1        | 3        | 0        | 0        | 0        | 0        | 4        |     |                                                      |      |      |     |     |     |           |                   |
| C*07:311                                                 | 07:311              | HLA09603  |                                               | 0        | 0        | 1        | 0        | 0        | 0        | 0        | 1        |     |                                                      |      |      |     |     |     |           |                   |
| C*07:312                                                 | 07:312              | HLA09605  |                                               | 0        | 0        | 4        | 0        | 0        | 0        | 1        | 5        |     |                                                      |      |      |     |     |     | WD        | WD                |
| <b>C*07:314 total</b>                                    | <b>07:314 total</b> |           |                                               | <b>0</b> | <b>2</b> | <b>4</b> | <b>0</b> | <b>0</b> | <b>0</b> | <b>1</b> | <b>7</b> |     |                                                      |      |      |     |     |     | <b>WD</b> | <b>WD</b>         |
| C*07:314                                                 | 07:314              |           |                                               | 0        | 0        | 3        | 0        | 0        | 0        | 1        | 4        |     |                                                      |      |      |     |     |     |           |                   |
| C*07:314:01                                              | 07:314:01           | HLA09689  |                                               | 0        | 1        | 0        | 0        | 0        | 0        | 0        | 1        |     |                                                      |      |      |     |     |     |           |                   |
| C*07:314:02                                              | 07:314:02           | HLA13259  |                                               | 0        | 1        | 1        | 0        | 0        | 0        | 0        | 2        |     |                                                      |      |      |     |     |     |           |                   |
| C*07:317                                                 | 07:317              | HLA09906  |                                               | 0        | 3        | 0        | 0        | 0        | 0        | 0        | 3        |     |                                                      |      |      |     |     |     |           |                   |
| C*07:319                                                 | 07:319              | HLA09997  |                                               | 0        | 0        | 1        | 0        | 0        | 0        | 0        | 1        |     |                                                      |      |      |     |     |     |           |                   |
| C*07:322                                                 | 07:322              | HLA10014  |                                               | 0        | 0        | 1        | 0        | 0        | 0        | 0        | 1        |     |                                                      |      |      |     |     |     |           |                   |
| C*07:325                                                 | 07:325              | HLA10053  |                                               | 0        | 0        | 0        | 0        | 1        | 0        | 0        | 1        |     |                                                      |      |      |     |     |     |           |                   |
| C*07:326                                                 | 07:326              | HLA10054  |                                               | 0        | 0        | 0        | 0        | 6        | 0        | 0        | 6        |     |                                                      |      |      | WD  |     |     | WD        | WD                |
| C*07:327                                                 | 07:327              | HLA10055  |                                               | 0        | 4        | 0        | 0        | 0        | 0        | 0        | 4        |     |                                                      |      |      |     |     |     |           |                   |
| C*07:328                                                 | 07:328              | HLA10058  |                                               | 0        | 0        | 0        | 0        | 0        | 0        | 1        | 1        |     |                                                      |      |      |     |     |     |           |                   |
| C*07:329N                                                | 07:329N             | HLA10064  |                                               | 0        | 0        | 2        | 0        | 0        | 0        | 0        | 2        |     |                                                      |      |      |     |     |     |           |                   |
| <b>C*07:330 total</b>                                    | <b>07:330 total</b> |           |                                               | <b>0</b> | <b>0</b> | <b>2</b> | <b>0</b> | <b>0</b> | <b>0</b> | <b>0</b> | <b>2</b> |     |                                                      |      |      |     |     |     |           |                   |
| C*07:330                                                 | 07:330              |           |                                               | 0        | 0        | 1        | 0        | 0        | 0        | 0        | 1        |     |                                                      |      |      |     |     |     |           |                   |
| C*07:330:01                                              | 07:330:01           | HLA10067  |                                               | 0        | 0        | 1        | 0        | 0        | 0        | 0        | 1        |     |                                                      |      |      |     |     |     |           |                   |
| C*07:331                                                 | 07:331              | HLA10068  |                                               | 0        | 0        | 1        | 0        | 0        | 0        | 0        | 1        |     |                                                      |      |      |     |     |     |           |                   |
| C*07:333                                                 | 07:333              | HLA10071  |                                               | 0        | 0        | 1        | 2        | 0        | 0        | 0        | 3        |     |                                                      |      |      |     |     |     |           |                   |
| C*07:335                                                 | 07:335              | HLA10073  |                                               | 0        | 0        | 11       | 0        | 0        | 0        | 0        | 11       |     |                                                      | WD   |      |     |     |     | WD        | WD                |
| C*07:336                                                 | 07:336              | HLA10074  |                                               | 0        | 0        | 1        | 0        | 0        | 0        | 0        | 1        |     |                                                      |      |      |     |     |     |           |                   |
| C*07:338                                                 | 07:338              | HLA10424  |                                               | 0        | 0        | 1        | 0        | 0        | 0        | 0        | 1        |     |                                                      |      |      |     |     |     |           |                   |
| C*07:339                                                 | 07:339              | HLA10427  |                                               | 0        | 13       | 0        | 0        | 0        | 0        | 0        | 13       |     | I                                                    |      |      |     |     |     | WD        | I                 |
| C*07:340                                                 | 07:340              | HLA10430  |                                               | 0        | 17       | 0        | 0        | 0        | 0        | 0        | 17       |     | I                                                    |      |      |     |     |     | WD        | I                 |
| C*07:342                                                 | 07:342              | HLA10565  |                                               | 0        | 3        | 1        | 0        | 0        | 0        | 0        | 4        |     |                                                      |      |      |     |     |     |           |                   |



| Supplemental Table 10: HLA-C Allele Summary <sup>a</sup> |                     |           | Allele Count by Population Group <sup>b</sup> |          |          |          |          |          |          |          |          |     | 3.0.0 CIWD Category by Population Group <sup>c</sup> |      |      |     |     |     |           |                   |
|----------------------------------------------------------|---------------------|-----------|-----------------------------------------------|----------|----------|----------|----------|----------|----------|----------|----------|-----|------------------------------------------------------|------|------|-----|-----|-----|-----------|-------------------|
| Allele                                                   | Genomic typing      | Allele ID | G group                                       | AFA      | API      | EURO     | MENA     | HIS      | NAM      | UNK      | Total    | AFA | API                                                  | EURO | MENA | HIS | NAM | UNK | Total     | Highest Frequency |
| C*07:351                                                 | 07:351              | HLA10922  |                                               | 0        | 2        | 0        | 0        | 0        | 0        | 1        | 3        |     |                                                      |      |      |     |     |     |           |                   |
| C*07:352                                                 | 07:352              | HLA10930  |                                               | 0        | 0        | 2        | 0        | 0        | 0        | 1        | 3        |     |                                                      |      |      |     |     |     |           |                   |
| C*07:353                                                 | 07:353              | HLA10931  |                                               | 0        | 0        | 0        | 0        | 1        | 0        | 0        | 1        |     |                                                      |      |      |     |     |     |           |                   |
| C*07:354                                                 | 07:354              | HLA10925  |                                               | 0        | 0        | 3        | 0        | 0        | 0        | 0        | 3        |     |                                                      |      |      |     |     |     |           |                   |
| C*07:356                                                 | 07:356              | HLA11044  |                                               | 0        | 0        | 0        | 0        | 0        | 0        | 1        | 1        |     |                                                      |      |      |     |     |     |           |                   |
| C*07:357                                                 | 07:357              | HLA11048  |                                               | 0        | 1        | 1        | 0        | 0        | 0        | 0        | 2        |     |                                                      |      |      |     |     |     |           |                   |
| C*07:358                                                 | 07:358              | HLA11049  |                                               | 0        | 0        | 3        | 0        | 0        | 0        | 0        | 3        |     |                                                      |      |      |     |     |     |           |                   |
| C*07:360                                                 | 07:360              | HLA11553  |                                               | 0        | 0        | 8        | 0        | 0        | 0        | 3        | 11       |     |                                                      | WD   |      |     |     |     | WD        | WD                |
| C*07:361                                                 | 07:361              | HLA11252  |                                               | 0        | 4        | 0        | 0        | 0        | 0        | 0        | 4        |     |                                                      |      |      |     |     |     |           |                   |
| C*07:363                                                 | 07:363              | HLA11254  |                                               | 0        | 0        | 1        | 0        | 0        | 0        | 0        | 1        |     |                                                      |      |      |     |     |     |           |                   |
| C*07:365                                                 | 07:365              | HLA11336  |                                               | 1        | 0        | 0        | 0        | 0        | 0        | 0        | 1        |     |                                                      |      |      |     |     |     |           |                   |
| C*07:366                                                 | 07:366              | HLA11337  |                                               | 0        | 0        | 2        | 0        | 0        | 0        | 0        | 2        |     |                                                      |      |      |     |     |     |           |                   |
| <b>C*07:368 total</b>                                    | <b>07:368 total</b> |           |                                               | <b>0</b> | <b>1</b> | <b>2</b> | <b>0</b> | <b>0</b> | <b>0</b> | <b>4</b> | <b>7</b> |     |                                                      |      |      |     |     |     | <b>WD</b> | <b>WD</b>         |
| C*07:368                                                 | 07:368              |           |                                               | 0        | 0        | 0        | 0        | 0        | 0        | 2        | 2        |     |                                                      |      |      |     |     |     |           |                   |
| C*07:368:01                                              | 07:368:01           | HLA11347  |                                               | 0        | 0        | 2        | 0        | 0        | 0        | 2        | 4        |     |                                                      |      |      |     |     |     |           |                   |
| C*07:368:02                                              | 07:368:02           | HLA15316  |                                               | 0        | 1        | 0        | 0        | 0        | 0        | 0        | 1        |     |                                                      |      |      |     |     |     |           |                   |
| C*07:369                                                 | 07:369              | HLA11556  |                                               | 0        | 0        | 4        | 0        | 0        | 0        | 2        | 6        |     |                                                      |      |      |     |     |     | WD        | WD                |
| C*07:370                                                 | 07:370              | HLA11458  |                                               | 0        | 0        | 1        | 0        | 0        | 0        | 0        | 1        |     |                                                      |      |      |     |     |     |           |                   |
| C*07:376                                                 | 07:376              | HLA11852  |                                               | 0        | 0        | 0        | 1        | 0        | 0        | 0        | 1        |     |                                                      |      |      |     |     |     |           |                   |
| C*07:378                                                 | 07:378              | HLA11856  |                                               | 0        | 0        | 0        | 1        | 0        | 0        | 0        | 1        |     |                                                      |      |      |     |     |     |           |                   |
| C*07:379                                                 | 07:379              | HLA12019  |                                               | 0        | 0        | 2        | 0        | 0        | 0        | 0        | 2        |     |                                                      |      |      |     |     |     |           |                   |
| C*07:381                                                 | 07:381              | HLA12040  |                                               | 0        | 1        | 3        | 0        | 0        | 0        | 0        | 4        |     |                                                      |      |      |     |     |     |           |                   |
| C*07:384                                                 | 07:384              | HLA12083  |                                               | 0        | 0        | 1        | 0        | 0        | 0        | 0        | 1        |     |                                                      |      |      |     |     |     |           |                   |
| C*07:386                                                 | 07:386              | HLA12097  |                                               | 0        | 0        | 1        | 0        | 0        | 0        | 0        | 1        |     |                                                      |      |      |     |     |     |           |                   |
| C*07:387                                                 | 07:387              | HLA12139  |                                               | 0        | 0        | 1        | 0        | 0        | 0        | 0        | 1        |     |                                                      |      |      |     |     |     |           |                   |
| C*07:390                                                 | 07:390              | HLA12142  |                                               | 0        | 0        | 1        | 0        | 0        | 0        | 0        | 1        |     |                                                      |      |      |     |     |     |           |                   |
| C*07:391                                                 | 07:391              | HLA12145  |                                               | 0        | 0        | 5        | 0        | 0        | 0        | 0        | 5        |     |                                                      | WD   |      |     |     |     | WD        | WD                |
| C*07:393N                                                | 07:393N             | HLA12185  |                                               | 0        | 1        | 0        | 0        | 0        | 0        | 0        | 1        |     |                                                      |      |      |     |     |     |           |                   |
| C*07:394                                                 | 07:394              | HLA12323  |                                               | 0        | 0        | 1        | 0        | 0        | 0        | 0        | 1        |     |                                                      |      |      |     |     |     |           |                   |
| C*07:396                                                 | 07:396              | HLA12325  |                                               | 0        | 1        | 0        | 0        | 0        | 0        | 0        | 1        |     |                                                      |      |      |     |     |     |           |                   |
| C*07:397                                                 | 07:397              | HLA12326  |                                               | 0        | 2        | 0        | 0        | 0        | 0        | 0        | 2        |     |                                                      |      |      |     |     |     |           |                   |

| Supplemental Table 10: HLA-C Allele Summary <sup>a</sup> |                     |           | Allele Count by Population Group <sup>b</sup> |          |          |          |          |          |          |          |          |     | 3.0.0 CIWD Category by Population Group <sup>c</sup> |      |      |     |     |     |       |                   |
|----------------------------------------------------------|---------------------|-----------|-----------------------------------------------|----------|----------|----------|----------|----------|----------|----------|----------|-----|------------------------------------------------------|------|------|-----|-----|-----|-------|-------------------|
| Allele                                                   | Genomic typing      | Allele ID | G group                                       | AFA      | API      | EURO     | MENA     | HIS      | NAM      | UNK      | Total    | AFA | API                                                  | EURO | MENA | HIS | NAM | UNK | Total | Highest Frequency |
| C*07:399                                                 | 07:399              | HLA12328  |                                               | 0        | 0        | 2        | 0        | 0        | 0        | 0        | 2        |     |                                                      |      |      |     |     |     |       |                   |
| C*07:400                                                 | 07:400              | HLA12329  |                                               | 0        | 0        | 2        | 0        | 0        | 0        | 0        | 2        |     |                                                      |      |      |     |     |     |       |                   |
| C*07:401                                                 | 07:401              | HLA12330  |                                               | 0        | 0        | 0        | 0        | 0        | 0        | 1        | 1        |     |                                                      |      |      |     |     |     |       |                   |
| C*07:406                                                 | 07:406              | HLA12767  |                                               | 0        | 0        | 0        | 1        | 0        | 0        | 0        | 1        |     |                                                      |      |      |     |     |     |       |                   |
| C*07:408                                                 | 07:408              | HLA12769  |                                               | 0        | 0        | 3        | 0        | 0        | 0        | 1        | 4        |     |                                                      |      |      |     |     |     |       |                   |
| C*07:409                                                 | 07:409              | HLA12770  |                                               | 0        | 0        | 4        | 0        | 0        | 0        | 4        | 8        |     |                                                      |      |      |     |     |     | WD    | WD                |
| C*07:411                                                 | 07:411              | HLA13036  |                                               | 0        | 0        | 2        | 0        | 0        | 0        | 0        | 2        |     |                                                      |      |      |     |     |     |       |                   |
| C*07:412                                                 | 07:412              | HLA13037  |                                               | 0        | 0        | 2        | 0        | 0        | 0        | 0        | 2        |     |                                                      |      |      |     |     |     |       |                   |
| C*07:413                                                 | 07:413              | HLA13029  |                                               | 0        | 0        | 0        | 0        | 0        | 1        | 0        | 1        |     |                                                      |      |      |     |     |     |       |                   |
| C*07:415                                                 | 07:415              | HLA13041  |                                               | 0        | 1        | 0        | 0        | 0        | 0        | 0        | 1        |     |                                                      |      |      |     |     |     |       |                   |
| C*07:417                                                 | 07:417              | HLA13094  |                                               | 0        | 0        | 2        | 0        | 0        | 0        | 0        | 2        |     |                                                      |      |      |     |     |     |       |                   |
| C*07:418                                                 | 07:418              | HLA13095  |                                               | 0        | 0        | 0        | 0        | 0        | 0        | 1        | 1        |     |                                                      |      |      |     |     |     |       |                   |
| C*07:420                                                 | 07:420              | HLA13406  |                                               | 0        | 0        | 1        | 0        | 0        | 0        | 0        | 1        |     |                                                      |      |      |     |     |     |       |                   |
| C*07:428                                                 | 07:428              | HLA13552  |                                               | 0        | 1        | 0        | 0        | 0        | 0        | 0        | 1        |     |                                                      |      |      |     |     |     |       |                   |
| C*07:429                                                 | 07:429              | HLA13553  |                                               | 0        | 0        | 0        | 3        | 0        | 0        | 0        | 3        |     |                                                      |      |      |     |     |     |       |                   |
| C*07:433                                                 | 07:433              | HLA13557  |                                               | 0        | 0        | 1        | 0        | 0        | 0        | 0        | 1        |     |                                                      |      |      |     |     |     |       |                   |
| C*07:434                                                 | 07:434              | HLA13558  |                                               | 0        | 0        | 1        | 0        | 0        | 0        | 0        | 1        |     |                                                      |      |      |     |     |     |       |                   |
| C*07:438                                                 | 07:438              | HLA13664  |                                               | 0        | 0        | 1        | 0        | 0        | 0        | 0        | 1        |     |                                                      |      |      |     |     |     |       |                   |
| C*07:439                                                 | 07:439              | HLA13667  |                                               | 0        | 0        | 1        | 0        | 0        | 0        | 0        | 1        |     |                                                      |      |      |     |     |     |       |                   |
| <b>C*07:441 total</b>                                    | <b>07:441 total</b> |           |                                               | <b>0</b> | <b>0</b> | <b>1</b> | <b>0</b> | <b>0</b> | <b>0</b> | <b>0</b> | <b>1</b> |     |                                                      |      |      |     |     |     |       |                   |
| C*07:441                                                 | 07:441              |           |                                               | 0        | 0        | 1        | 0        | 0        | 0        | 0        | 1        |     |                                                      |      |      |     |     |     |       |                   |
| C*07:442                                                 | 07:442              | HLA13747  |                                               | 0        | 0        | 1        | 0        | 0        | 0        | 0        | 1        |     |                                                      |      |      |     |     |     |       |                   |
| C*07:443                                                 | 07:443              | HLA13748  |                                               | 0        | 0        | 0        | 0        | 0        | 0        | 1        | 1        |     |                                                      |      |      |     |     |     |       |                   |
| C*07:444                                                 | 07:444              | HLA13749  |                                               | 0        | 2        | 0        | 0        | 0        | 0        | 0        | 2        |     |                                                      |      |      |     |     |     |       |                   |
| C*07:447                                                 | 07:447              | HLA13801  |                                               | 0        | 1        | 0        | 0        | 0        | 0        | 0        | 1        |     |                                                      |      |      |     |     |     |       |                   |
| C*07:448                                                 | 07:448              | HLA13863  |                                               | 0        | 0        | 2        | 0        | 0        | 0        | 1        | 3        |     |                                                      |      |      |     |     |     |       |                   |
| C*07:450                                                 | 07:450              | HLA13869  |                                               | 0        | 2        | 12       | 0        | 0        | 0        | 0        | 14       |     |                                                      | WD   |      |     |     |     | WD    | WD                |
| C*07:452N                                                | 07:452N             | HLA13871  |                                               | 0        | 0        | 6        | 1        | 0        | 0        | 0        | 7        |     |                                                      | WD   |      |     |     |     | WD    | WD                |
| C*07:455                                                 | 07:455              | HLA14022  |                                               | 0        | 2        | 0        | 0        | 0        | 0        | 0        | 2        |     |                                                      |      |      |     |     |     |       |                   |
| C*07:456                                                 | 07:456              | HLA14024  |                                               | 0        | 0        | 1        | 0        | 0        | 0        | 0        | 1        |     |                                                      |      |      |     |     |     |       |                   |
| C*07:457                                                 | 07:457              | HLA14025  |                                               | 0        | 2        | 0        | 0        | 0        | 0        | 0        | 2        |     |                                                      |      |      |     |     |     |       |                   |

| Supplemental Table 10: HLA-C Allele Summary <sup>a</sup> |                      |           | Allele Count by Population Group <sup>b</sup> |          |          |          |          |          |          |          |          |     | 3.0.0 CIWD Category by Population Group <sup>c</sup> |      |      |     |     |     |       |                   |
|----------------------------------------------------------|----------------------|-----------|-----------------------------------------------|----------|----------|----------|----------|----------|----------|----------|----------|-----|------------------------------------------------------|------|------|-----|-----|-----|-------|-------------------|
| Allele                                                   | Genomic typing       | Allele ID | G group                                       | AFA      | API      | EURO     | MENA     | HIS      | NAM      | UNK      | Total    | AFA | API                                                  | EURO | MENA | HIS | NAM | UNK | Total | Highest Frequency |
| C*07:463                                                 | 07:463               | HLA14248  |                                               | 0        | 0        | 2        | 0        | 0        | 0        | 0        | 2        |     |                                                      |      |      |     |     |     |       |                   |
| C*07:464                                                 | 07:464               | HLA14249  |                                               | 0        | 0        | 0        | 0        | 1        | 0        | 0        | 1        |     |                                                      |      |      |     |     |     |       |                   |
| C*07:465                                                 | 07:465               | HLA14251  |                                               | 0        | 1        | 0        | 0        | 0        | 0        | 0        | 1        |     |                                                      |      |      |     |     |     |       |                   |
| C*07:470                                                 | 07:470               | HLA14327  |                                               | 0        | 0        | 0        | 0        | 0        | 0        | 1        | 1        |     |                                                      |      |      |     |     |     |       |                   |
| C*07:473                                                 | 07:473               | HLA14330  |                                               | 0        | 1        | 0        | 0        | 0        | 0        | 0        | 1        |     |                                                      |      |      |     |     |     |       |                   |
| C*07:476N                                                | 07:476N              | HLA14250  |                                               | 0        | 1        | 0        | 0        | 0        | 0        | 0        | 1        |     |                                                      |      |      |     |     |     |       |                   |
| C*07:480                                                 | 07:480               | HLA14521  |                                               | 0        | 2        | 0        | 0        | 0        | 0        | 0        | 2        |     |                                                      |      |      |     |     |     |       |                   |
| C*07:483N                                                | 07:483N              | HLA14527  |                                               | 0        | 0        | 4        | 0        | 0        | 0        | 0        | 4        |     |                                                      |      |      |     |     |     |       |                   |
| C*07:484N                                                | 07:484N              | HLA14528  |                                               | 1        | 0        | 0        | 0        | 0        | 0        | 1        | 2        |     |                                                      |      |      |     |     |     |       |                   |
| C*07:485                                                 | 07:485               | HLA14529  |                                               | 0        | 0        | 1        | 0        | 0        | 0        | 0        | 1        |     |                                                      |      |      |     |     |     |       |                   |
| C*07:488                                                 | 07:488               | HLA14602  |                                               | 0        | 0        | 1        | 0        | 0        | 0        | 0        | 1        |     |                                                      |      |      |     |     |     |       |                   |
| C*07:490                                                 | 07:490               | HLA14740  |                                               | 0        | 0        | 0        | 0        | 0        | 0        | 1        | 1        |     |                                                      |      |      |     |     |     |       |                   |
| <b>C*07:491N total</b>                                   | <b>07:491N total</b> |           |                                               | <b>0</b> | <b>0</b> | <b>2</b> | <b>0</b> | <b>0</b> | <b>0</b> | <b>0</b> | <b>2</b> |     |                                                      |      |      |     |     |     |       |                   |
| C*07:491:02N                                             | 07:491:02N           | HLA15145  |                                               | 0        | 0        | 2        | 0        | 0        | 0        | 0        | 2        |     |                                                      |      |      |     |     |     |       |                   |
| C*07:493                                                 | 07:493               | HLA14743  |                                               | 0        | 0        | 1        | 0        | 0        | 0        | 0        | 1        |     |                                                      |      |      |     |     |     |       |                   |
| C*07:496                                                 | 07:496               | HLA14746  |                                               | 0        | 1        | 0        | 0        | 0        | 0        | 0        | 1        |     |                                                      |      |      |     |     |     |       |                   |
| C*07:498                                                 | 07:498               | HLA14748  |                                               | 0        | 1        | 0        | 0        | 0        | 0        | 0        | 1        |     |                                                      |      |      |     |     |     |       |                   |
| C*07:504                                                 | 07:504               | HLA15044  |                                               | 0        | 0        | 2        | 0        | 0        | 0        | 0        | 2        |     |                                                      |      |      |     |     |     |       |                   |
| C*07:506                                                 | 07:506               | HLA15046  |                                               | 0        | 0        | 1        | 0        | 0        | 0        | 0        | 1        |     |                                                      |      |      |     |     |     |       |                   |
| C*07:508                                                 | 07:508               | HLA15112  |                                               | 0        | 0        | 1        | 0        | 0        | 0        | 0        | 1        |     |                                                      |      |      |     |     |     |       |                   |
| C*07:514                                                 | 07:514               | HLA15136  |                                               | 0        | 0        | 1        | 0        | 0        | 0        | 0        | 1        |     |                                                      |      |      |     |     |     |       |                   |
| C*07:519                                                 | 07:519               | HLA15173  |                                               | 0        | 1        | 0        | 0        | 0        | 0        | 0        | 1        |     |                                                      |      |      |     |     |     |       |                   |
| C*07:525                                                 | 07:525               | HLA15202  |                                               | 0        | 0        | 1        | 0        | 0        | 0        | 0        | 1        |     |                                                      |      |      |     |     |     |       |                   |
| C*07:528                                                 | 07:528               | HLA15213  |                                               | 0        | 0        | 1        | 0        | 0        | 0        | 0        | 1        |     |                                                      |      |      |     |     |     |       |                   |
| C*07:529                                                 | 07:529               | HLA15218  |                                               | 0        | 0        | 1        | 0        | 0        | 0        | 0        | 1        |     |                                                      |      |      |     |     |     |       |                   |
| C*07:541                                                 | 07:541               | HLA15741  |                                               | 0        | 0        | 1        | 0        | 0        | 0        | 0        | 1        |     |                                                      |      |      |     |     |     |       |                   |
| C*07:543                                                 | 07:543               | HLA15591  |                                               | 0        | 0        | 0        | 0        | 1        | 0        | 0        | 1        |     |                                                      |      |      |     |     |     |       |                   |
| C*07:548                                                 | 07:548               | HLA15797  |                                               | 0        | 1        | 0        | 0        | 0        | 0        | 0        | 1        |     |                                                      |      |      |     |     |     |       |                   |
| C*07:550                                                 | 07:550               | HLA15811  |                                               | 0        | 0        | 1        | 0        | 0        | 0        | 0        | 1        |     |                                                      |      |      |     |     |     |       |                   |
| C*07:552                                                 | 07:552               | HLA15896  |                                               | 0        | 0        | 1        | 0        | 0        | 0        | 0        | 1        |     |                                                      |      |      |     |     |     |       |                   |
| C*07:555                                                 | 07:555               | HLA15912  |                                               | 0        | 0        | 1        | 0        | 0        | 0        | 0        | 1        |     |                                                      |      |      |     |     |     |       |                   |

| Supplemental Table 10: HLA-C Allele Summary <sup>a</sup> |                        |           | Allele Count by Population Group <sup>b</sup> |              |              |               |              |              |             |              |               | 3.0.0 CIWD Category by Population Group <sup>c</sup> |          |          |          |          |          |          |          |                   |
|----------------------------------------------------------|------------------------|-----------|-----------------------------------------------|--------------|--------------|---------------|--------------|--------------|-------------|--------------|---------------|------------------------------------------------------|----------|----------|----------|----------|----------|----------|----------|-------------------|
| Allele                                                   | Genomic typing         | Allele ID | G group                                       | AFA          | API          | EURO          | MENA         | HIS          | NAM         | UNK          | Total         | AFA                                                  | API      | EURO     | MENA     | HIS      | NAM      | UNK      | Total    | Highest Frequency |
| C*07:558                                                 | 07:558                 | HLA15939  |                                               | 0            | 0            | 1             | 0            | 0            | 0           | 0            | 1             |                                                      |          |          |          |          |          |          |          |                   |
| C*07:563                                                 | 07:563                 | HLA15976  |                                               | 0            | 0            | 2             | 0            | 0            | 0           | 0            | 2             |                                                      |          |          |          |          |          |          |          |                   |
| C*07:573                                                 | 07:573                 | HLA16517  |                                               | 0            | 2            | 0             | 0            | 0            | 0           | 0            | 2             |                                                      |          |          |          |          |          |          |          |                   |
| C*07:CODE                                                | 07:CODE                |           |                                               | 11975        | 16236        | 549698        | 6934         | 23077        | 2997        | 46318        | 657235        | NA                                                   | NA       | NA       | NA       | NA       | NA       | NA       | NA       | NA                |
| <b>C*08:01 total</b>                                     | <b>08:01 total</b>     |           |                                               | <b>424</b>   | <b>51532</b> | <b>4872</b>   | <b>1233</b>  | <b>14636</b> | <b>930</b>  | <b>8431</b>  | <b>82058</b>  | <b>C</b>                                             | <b>C</b> | <b>C</b> | <b>C</b> | <b>C</b> | <b>C</b> | <b>C</b> | <b>C</b> | <b>C</b>          |
| C*08:01                                                  | 08:01                  |           |                                               | 2            | 6            | 32            | 0            | 5            | 0           | 2            | 47            |                                                      | WD       | WD       |          | WD       |          |          | WD       | WD                |
| C*08:01P                                                 | 08:01P                 |           |                                               | 0            | 1            | 5             | 0            | 0            | 0           | 0            | 6             |                                                      |          | WD       |          |          |          |          | WD       | WD                |
| <b>C*08:01:01G total</b>                                 | <b>08:01:01G total</b> |           |                                               | <b>422</b>   | <b>51502</b> | <b>4834</b>   | <b>1233</b>  | <b>14628</b> | <b>930</b>  | <b>8426</b>  | <b>81975</b>  | <b>C</b>                                             | <b>C</b> | <b>C</b> | <b>C</b> | <b>C</b> | <b>C</b> | <b>C</b> | <b>C</b> | <b>C</b>          |
| C*08:01:01G                                              | 08:01:01G              |           | 08:01:01G                                     | 355          | 44862        | 4608          | 1193         | 10714        | 679         | 7118         | 69529         | C                                                    | C        | C        | C        | C        | C        | C        | C        | C                 |
| C*08:01:01                                               | 08:01:01               |           | 08:01:01G                                     | 67           | 6368         | 226           | 40           | 3908         | 251         | 1275         | 12135         | C                                                    | C        | I        | WD       | C        | C        | C        | C        | C                 |
| C*08:01:03                                               | 08:01:03               | HLA05786  | 08:01:01G                                     | 0            | 1            | 0             | 0            | 0            | 0           | 0            | 1             |                                                      |          |          |          |          |          |          |          |                   |
| C*08:01:13                                               | 08:01:13               | HLA10582  | 08:01:01G                                     | 0            | 1            | 0             | 0            | 0            | 0           | 0            | 1             |                                                      |          |          |          |          |          |          |          |                   |
| C*08:20                                                  | 08:20                  | HLA03632  | 08:01:01G                                     | 0            | 0            | 0             | 0            | 2            | 0           | 0            | 2             |                                                      |          |          |          |          |          |          |          |                   |
| C*08:22                                                  | 08:22                  | HLA03680  | 08:01:01G                                     | 0            | 256          | 0             | 0            | 4            | 0           | 33           | 293           |                                                      | C        |          |          |          |          | I        | I        | C                 |
| C*08:24                                                  | 08:24                  | HLA03763  | 08:01:01G                                     | 0            | 8            | 0             | 0            | 0            | 0           | 0            | 8             |                                                      | WD       |          |          |          |          |          | WD       | WD                |
| C*08:99                                                  | 08:99                  | HLA10619  | 08:01:01G                                     | 0            | 2            | 0             | 0            | 0            | 0           | 0            | 2             |                                                      |          |          |          |          |          |          |          |                   |
| C*08:148                                                 | 08:148                 | HLA16830  | 08:01:01G                                     | 0            | 4            | 0             | 0            | 0            | 0           | 0            | 4             |                                                      |          |          |          |          |          |          |          |                   |
| C*08:01:02                                               | 08:01:02               | HLA01586  |                                               | 0            | 11           | 1             | 0            | 0            | 0           | 2            | 14            |                                                      | WD       |          |          |          |          |          | WD       | WD                |
| C*08:01:06                                               | 08:01:06               | HLA08157  |                                               | 0            | 1            | 0             | 0            | 0            | 0           | 1            | 2             |                                                      |          |          |          |          |          |          |          |                   |
| C*08:01:07                                               | 08:01:07               | HLA08158  |                                               | 0            | 8            | 0             | 0            | 0            | 0           | 0            | 8             |                                                      | WD       |          |          |          |          |          | WD       | WD                |
| C*08:01:08                                               | 08:01:08               | HLA08159  |                                               | 0            | 0            | 0             | 0            | 2            | 0           | 0            | 2             |                                                      |          |          |          |          |          |          |          |                   |
| C*08:01:14                                               | 08:01:14               | HLA11095  |                                               | 0            | 2            | 0             | 0            | 0            | 0           | 0            | 2             |                                                      |          |          |          |          |          |          |          |                   |
| C*08:01:16                                               | 08:01:16               | HLA11571  |                                               | 0            | 1            | 0             | 0            | 0            | 0           | 0            | 1             |                                                      |          |          |          |          |          |          |          |                   |
| C*08:01:18                                               | 08:01:18               | HLA12333  |                                               | 0            | 0            | 0             | 0            | 1            | 0           | 0            | 1             |                                                      |          |          |          |          |          |          |          |                   |
| <b>C*08:02 total</b>                                     | <b>08:02 total</b>     |           |                                               | <b>13754</b> | <b>2901</b>  | <b>290119</b> | <b>10577</b> | <b>30263</b> | <b>2267</b> | <b>45740</b> | <b>395621</b> | <b>C</b>                                             | <b>C</b> | <b>C</b> | <b>C</b> | <b>C</b> | <b>C</b> | <b>C</b> | <b>C</b> | <b>C</b>          |
| C*08:02                                                  | 08:02                  |           |                                               | 89           | 49           | 7397          | 313          | 55           | 17          | 835          | 8755          | C                                                    | I        | C        | C        | I        | C        | C        | C        | C                 |
| C*08:02P                                                 | 08:02P                 |           |                                               | 4            | 0            | 434           | 2            | 1            | 0           | 2            | 443           |                                                      |          | I        |          |          |          |          | I        | I                 |
| <b>C*08:02:01G total</b>                                 | <b>08:02:01G total</b> |           |                                               | <b>13651</b> | <b>2851</b>  | <b>282270</b> | <b>10261</b> | <b>30201</b> | <b>2250</b> | <b>44896</b> | <b>386380</b> | <b>C</b>                                             | <b>C</b> | <b>C</b> | <b>C</b> | <b>C</b> | <b>C</b> | <b>C</b> | <b>C</b> | <b>C</b>          |
| C*08:02:01G                                              | 08:02:01G              |           | 08:02:01G                                     | 10121        | 2400         | 252509        | 9558         | 20375        | 1482        | 37894        | 334339        | C                                                    | C        | C        | C        | C        | C        | C        | C        | C                 |
| C*08:02:01                                               | 08:02:01               |           | 08:02:01G                                     | 1689         | 208          | 16731         | 411          | 4259         | 346         | 4819         | 28463         | C                                                    | C        | C        | C        | C        | C        | C        | C        | C                 |
| C*08:02:01:01                                            | 08:02:01:01            | HLA00446  | 08:02:01G                                     | 1432         | 126          | 9639          | 270          | 4642         | 373         | 1656         | 18138         | C                                                    | C        | C        | C        | C        | C        | C        | C        | C                 |

| Supplemental Table 10: HLA-C Allele Summary <sup>a</sup> |                        |           | Allele Count by Population Group <sup>b</sup> |             |             |             |            |             |            |             |              | 3.0.0 CIWD Category by Population Group <sup>c</sup> |          |           |          |          |          |           |           |                   |
|----------------------------------------------------------|------------------------|-----------|-----------------------------------------------|-------------|-------------|-------------|------------|-------------|------------|-------------|--------------|------------------------------------------------------|----------|-----------|----------|----------|----------|-----------|-----------|-------------------|
| Allele                                                   | Genomic typing         | Allele ID | G group                                       | AFA         | API         | EURO        | MENA       | HIS         | NAM        | UNK         | Total        | AFA                                                  | API      | EURO      | MENA     | HIS      | NAM      | UNK       | Total     | Highest Frequency |
| C*08:02:01:02                                            | 08:02:01:02            | HLA10680  | 08:02:01G                                     | 409         | 117         | 3390        | 22         | 925         | 49         | 527         | 5439         | C                                                    | I        | C         | WD       | C        | C        | C         | C         | C                 |
| C*08:110                                                 | 08:110                 | HLA11957  | 08:02:01G                                     | 0           | 0           | 1           | 0          | 0           | 0          | 0           | 1            |                                                      |          |           |          |          |          |           |           |                   |
| C*08:02:02                                               | 08:02:02               | HLA04345  |                                               | 0           | 0           | 7           | 0          | 0           | 0          | 1           | 8            |                                                      |          | WD        |          |          |          |           | WD        | WD                |
| C*08:02:04                                               | 08:02:04               | HLA05309  |                                               | 3           | 1           | 5           | 0          | 0           | 0          | 2           | 11           |                                                      |          | WD        |          |          |          |           | WD        | WD                |
| C*08:02:06                                               | 08:02:06               | HLA06413  |                                               | 3           | 0           | 1           | 1          | 1           | 0          | 2           | 8            |                                                      |          |           |          |          |          |           | WD        | WD                |
| C*08:02:07                                               | 08:02:07               | HLA07273  |                                               | 0           | 0           | 2           | 0          | 0           | 0          | 0           | 2            |                                                      |          |           |          |          |          |           |           |                   |
| C*08:02:08                                               | 08:02:08               | HLA08753  |                                               | 4           | 0           | 0           | 0          | 2           | 0          | 2           | 8            |                                                      |          |           |          |          |          |           | WD        | WD                |
| C*08:02:09                                               | 08:02:09               | HLA09026  |                                               | 0           | 0           | 2           | 0          | 0           | 0          | 0           | 2            |                                                      |          |           |          |          |          |           |           |                   |
| C*08:02:10                                               | 08:02:10               | HLA09194  |                                               | 0           | 0           | 1           | 0          | 0           | 0          | 0           | 1            |                                                      |          |           |          |          |          |           |           |                   |
| C*08:02:11                                               | 08:02:11               | HLA11258  |                                               | 0           | 0           | 0           | 0          | 3           | 0          | 0           | 3            |                                                      |          |           |          |          |          |           |           |                   |
| <b>C*08:03 total</b>                                     | <b>08:03 total</b>     |           |                                               | <b>48</b>   | <b>2692</b> | <b>4987</b> | <b>345</b> | <b>1881</b> | <b>199</b> | <b>1508</b> | <b>11660</b> | <b>C</b>                                             | <b>C</b> | <b>C</b>  | <b>C</b> | <b>C</b> | <b>C</b> | <b>C</b>  | <b>C</b>  | <b>C</b>          |
| C*08:03                                                  | 08:03                  |           |                                               | 0           | 10          | 32          | 0          | 5           | 0          | 7           | 54           |                                                      | WD       | WD        |          | WD       |          | WD        | WD        | WD                |
| C*08:03P                                                 | 08:03P                 |           |                                               | 0           | 0           | 3           | 0          | 0           | 0          | 0           | 3            |                                                      |          |           |          |          |          |           |           |                   |
| <b>C*08:03:01G total</b>                                 | <b>08:03:01G total</b> |           |                                               | <b>48</b>   | <b>2682</b> | <b>4952</b> | <b>345</b> | <b>1876</b> | <b>199</b> | <b>1501</b> | <b>11603</b> | <b>C</b>                                             | <b>C</b> | <b>C</b>  | <b>C</b> | <b>C</b> | <b>C</b> | <b>C</b>  | <b>C</b>  | <b>C</b>          |
| C*08:03:01G                                              | 08:03:01G              |           | 08:03:01G                                     | 28          | 2233        | 4635        | 327        | 1338        | 132        | 1317        | 10010        | WD                                                   | C        | C         | C        | C        | C        | C         | C         | C                 |
| C*08:03:01                                               | 08:03:01               | HLA00447  | 08:03:01G                                     | 20          | 449         | 317         | 18         | 538         | 67         | 184         | 1593         | WD                                                   | C        | I         | WD       | C        | C        | C         | I         | C                 |
| <b>C*08:04 total</b>                                     | <b>08:04 total</b>     |           |                                               | <b>3723</b> | <b>16</b>   | <b>253</b>  | <b>47</b>  | <b>637</b>  | <b>122</b> | <b>903</b>  | <b>5701</b>  | <b>C</b>                                             | <b>I</b> | <b>I</b>  | <b>C</b> | <b>C</b> | <b>C</b> | <b>C</b>  | <b>C</b>  | <b>C</b>          |
| C*08:04                                                  | 08:04                  |           |                                               | 503         | 1           | 23          | 2          | 96          | 19         | 111         | 755          | C                                                    |          | WD        |          | C        | C        | I         | I         | C                 |
| C*08:04:01                                               | 08:04:01               | HLA00448  |                                               | 3214        | 15          | 230         | 45         | 541         | 103        | 790         | 4938         | C                                                    | I        | I         | C        | C        | C        | C         | C         | C                 |
| C*08:04:02                                               | 08:04:02               | HLA07521  |                                               | 6           | 0           | 0           | 0          | 0           | 0          | 2           | 8            | WD                                                   |          |           |          |          |          |           | WD        | WD                |
| C*08:05                                                  | 08:05                  | HLA00449  |                                               | 8           | 0           | 75          | 0          | 1           | 0          | 14          | 98           | WD                                                   |          | WD        |          |          |          | I         | WD        | I                 |
| C*08:06                                                  | 08:06                  | HLA00450  |                                               | 0           | 16          | 6           | 0          | 0           | 46         | 52          | 120          |                                                      | I        | WD        |          |          | C        | I         | WD        | C                 |
| C*08:07                                                  | 08:07                  | HLA01136  |                                               | 0           | 0           | 4           | 0          | 1           | 0          | 1           | 6            |                                                      |          |           |          |          |          |           | WD        | WD                |
| <b>C*08:08 total</b>                                     | <b>08:08 total</b>     |           |                                               | <b>0</b>    | <b>1</b>    | <b>15</b>   | <b>0</b>   | <b>38</b>   | <b>1</b>   | <b>30</b>   | <b>85</b>    |                                                      |          | <b>WD</b> |          | <b>I</b> |          | <b>I</b>  | <b>WD</b> | <b>I</b>          |
| C*08:08                                                  | 08:08                  |           |                                               | 0           | 0           | 1           | 0          | 13          | 0          | 4           | 18           |                                                      |          |           |          | I        |          |           | WD        | I                 |
| C*08:08:01                                               | 08:08:01               | HLA01238  |                                               | 0           | 1           | 14          | 0          | 25          | 1          | 26          | 67           |                                                      |          | WD        |          | I        |          | I         | WD        | I                 |
| C*08:10                                                  | 08:10                  | HLA01835  |                                               | 0           | 1           | 12          | 0          | 144         | 9          | 14          | 180          |                                                      |          | WD        |          | C        | C        | I         | I         | C                 |
| C*08:11                                                  | 08:11                  | HLA01857  |                                               | 0           | 0           | 5           | 0          | 26          | 5          | 11          | 47           |                                                      |          | WD        |          | I        | WD       | WD        | WD        | I                 |
| C*08:12                                                  | 08:12                  | HLA01879  |                                               | 2           | 0           | 84          | 0          | 1           | 0          | 5           | 92           |                                                      |          | WD        |          |          |          | WD        | WD        | WD                |
| C*08:13                                                  | 08:13                  | HLA02302  |                                               | 14          | 0           | 3           | 0          | 24          | 0          | 2           | 43           | WD                                                   |          |           |          | I        |          |           | WD        | I                 |
| <b>C*08:15 total</b>                                     | <b>08:15 total</b>     |           |                                               | <b>1</b>    | <b>0</b>    | <b>31</b>   | <b>0</b>   | <b>3</b>    | <b>0</b>   | <b>8</b>    | <b>43</b>    |                                                      |          | <b>WD</b> |          |          |          | <b>WD</b> | <b>WD</b> | <b>WD</b>         |

| Supplemental Table 10: HLA-C Allele Summary <sup>a</sup> |                    |           | Allele Count by Population Group <sup>b</sup> |          |          |           |          |          |          |          |           |     | 3.0.0 CIWD Category by Population Group <sup>c</sup> |           |      |     |     |     |           |                   |
|----------------------------------------------------------|--------------------|-----------|-----------------------------------------------|----------|----------|-----------|----------|----------|----------|----------|-----------|-----|------------------------------------------------------|-----------|------|-----|-----|-----|-----------|-------------------|
| Allele                                                   | Genomic typing     | Allele ID | G group                                       | AFA      | API      | EURO      | MENA     | HIS      | NAM      | UNK      | Total     | AFA | API                                                  | EURO      | MENA | HIS | NAM | UNK | Total     | Highest Frequency |
| C*08:15                                                  | 08:15              |           |                                               | 0        | 0        | 4         | 0        | 1        | 0        | 1        | 6         |     |                                                      |           |      |     |     |     | WD        | WD                |
| C*08:15:01                                               | 08:15:01           | HLA03017  |                                               | 1        | 0        | 24        | 0        | 2        | 0        | 7        | 34        |     |                                                      | WD        |      |     |     | WD  | WD        | WD                |
| C*08:15:02                                               | 08:15:02           | HLA06138  |                                               | 0        | 0        | 3         | 0        | 0        | 0        | 0        | 3         |     |                                                      |           |      |     |     |     |           |                   |
| <b>C*08:16 total</b>                                     | <b>08:16 total</b> |           |                                               | <b>0</b> | <b>3</b> | <b>0</b>  | <b>0</b> | <b>0</b> | <b>0</b> | <b>0</b> | <b>3</b>  |     |                                                      |           |      |     |     |     |           |                   |
| C*08:16:01                                               | 08:16:01           | HLA03280  |                                               | 0        | 2        | 0         | 0        | 0        | 0        | 0        | 2         |     |                                                      |           |      |     |     |     |           |                   |
| C*08:16:02                                               | 08:16:02           | HLA07742  |                                               | 0        | 1        | 0         | 0        | 0        | 0        | 0        | 1         |     |                                                      |           |      |     |     |     |           |                   |
| <b>C*08:19 total</b>                                     | <b>08:19 total</b> |           |                                               | <b>0</b> | <b>0</b> | <b>1</b>  | <b>0</b> | <b>0</b> | <b>0</b> | <b>0</b> | <b>1</b>  |     |                                                      |           |      |     |     |     |           |                   |
| C*08:19                                                  | 08:19              |           |                                               | 0        | 0        | 1         | 0        | 0        | 0        | 0        | 1         |     |                                                      |           |      |     |     |     |           |                   |
| C*08:21                                                  | 08:21              | HLA03626  |                                               | 0        | 3        | 0         | 0        | 0        | 0        | 0        | 3         |     |                                                      |           |      |     |     |     |           |                   |
| C*08:23                                                  | 08:23              | HLA03696  |                                               | 0        | 0        | 12        | 0        | 0        | 0        | 3        | 15        |     |                                                      | WD        |      |     |     |     | WD        | WD                |
| C*08:25                                                  | 08:25              | HLA03767  |                                               | 0        | 0        | 3         | 0        | 4        | 0        | 1        | 8         |     |                                                      |           |      |     |     |     | WD        | WD                |
| C*08:26N                                                 | 08:26N             | HLA03818  |                                               | 0        | 1        | 0         | 0        | 0        | 0        | 0        | 1         |     |                                                      |           |      |     |     |     |           |                   |
| C*08:27                                                  | 08:27              | HLA03975  |                                               | 0        | 1        | 0         | 0        | 0        | 0        | 0        | 1         |     |                                                      |           |      |     |     |     |           |                   |
| C*08:28                                                  | 08:28              | HLA04319  |                                               | 0        | 0        | 85        | 4        | 0        | 0        | 2        | 91        |     |                                                      | WD        |      |     |     |     | WD        | WD                |
| C*08:29                                                  | 08:29              | HLA04332  |                                               | 0        | 0        | 4         | 0        | 0        | 0        | 0        | 4         |     |                                                      |           |      |     |     |     |           |                   |
| C*08:30                                                  | 08:30              | HLA04393  |                                               | 1        | 0        | 36        | 0        | 3        | 0        | 7        | 47        |     |                                                      | WD        |      |     |     | WD  | WD        | WD                |
| C*08:31                                                  | 08:31              | HLA04583  |                                               | 0        | 0        | 1         | 0        | 0        | 0        | 0        | 1         |     |                                                      |           |      |     |     |     |           |                   |
| C*08:32                                                  | 08:32              | HLA05180  |                                               | 12       | 0        | 2         | 0        | 0        | 0        | 4        | 18        | WD  |                                                      |           |      |     |     |     | WD        | WD                |
| <b>C*08:33 total</b>                                     | <b>08:33 total</b> |           |                                               | <b>0</b> | <b>0</b> | <b>13</b> | <b>0</b> | <b>0</b> | <b>0</b> | <b>1</b> | <b>14</b> |     |                                                      | <b>WD</b> |      |     |     |     | <b>WD</b> | <b>WD</b>         |
| C*08:33                                                  | 08:33              |           |                                               | 0        | 0        | 2         | 0        | 0        | 0        | 1        | 3         |     |                                                      |           |      |     |     |     |           |                   |
| C*08:33:01                                               | 08:33:01           | HLA05188  |                                               | 0        | 0        | 4         | 0        | 0        | 0        | 0        | 4         |     |                                                      |           |      |     |     |     |           |                   |
| C*08:33:02                                               | 08:33:02           | HLA07053  |                                               | 0        | 0        | 3         | 0        | 0        | 0        | 0        | 3         |     |                                                      |           |      |     |     |     |           |                   |
| C*08:33:03                                               | 08:33:03           | HLA08201  |                                               | 0        | 0        | 4         | 0        | 0        | 0        | 0        | 4         |     |                                                      |           |      |     |     |     |           |                   |
| C*08:34                                                  | 08:34              | HLA05196  |                                               | 0        | 0        | 2         | 0        | 0        | 0        | 0        | 2         |     |                                                      |           |      |     |     |     |           |                   |
| C*08:35                                                  | 08:35              | HLA05395  |                                               | 0        | 0        | 1         | 0        | 11       | 0        | 8        | 20        |     |                                                      |           |      | I   |     | WD  | WD        | I                 |
| C*08:37                                                  | 08:37              | HLA05579  |                                               | 0        | 0        | 1         | 0        | 0        | 0        | 0        | 1         |     |                                                      |           |      |     |     |     |           |                   |
| C*08:41                                                  | 08:41              | HLA05790  |                                               | 0        | 3        | 0         | 0        | 0        | 0        | 0        | 3         |     |                                                      |           |      |     |     |     |           |                   |
| C*08:43                                                  | 08:43              | HLA05874  |                                               | 10       | 0        | 0         | 0        | 0        | 1        | 3        | 14        | WD  |                                                      |           |      |     |     |     | WD        | WD                |
| C*08:50                                                  | 08:50              | HLA06428  |                                               | 0        | 10       | 0         | 0        | 0        | 1        | 0        | 11        |     | WD                                                   |           |      |     |     |     | WD        | WD                |
| C*08:51                                                  | 08:51              | HLA06721  |                                               | 0        | 0        | 5         | 0        | 0        | 0        | 0        | 5         |     |                                                      | WD        |      |     |     |     | WD        | WD                |
| C*08:53                                                  | 08:53              | HLA07050  |                                               | 0        | 0        | 33        | 0        | 1        | 0        | 2        | 36        |     |                                                      | WD        |      |     |     |     | WD        | WD                |

| Supplemental Table 10: HLA-C Allele Summary <sup>a</sup> |                    |           | Allele Count by Population Group <sup>b</sup> |          |          |          |          |          |          |          |          |     | 3.0.0 CIWD Category by Population Group <sup>c</sup> |      |      |     |     |     |       |                   |  |
|----------------------------------------------------------|--------------------|-----------|-----------------------------------------------|----------|----------|----------|----------|----------|----------|----------|----------|-----|------------------------------------------------------|------|------|-----|-----|-----|-------|-------------------|--|
| Allele                                                   | Genomic typing     | Allele ID | G group                                       | AFA      | API      | EURO     | MENA     | HIS      | NAM      | UNK      | Total    | AFA | API                                                  | EURO | MENA | HIS | NAM | UNK | Total | Highest Frequency |  |
| C*08:54                                                  | 08:54              | HLA07110  |                                               | 0        | 0        | 4        | 0        | 3        | 0        | 4        | 11       |     |                                                      |      |      |     |     |     | WD    | WD                |  |
| C*08:55N                                                 | 08:55N             | HLA07345  |                                               | 0        | 0        | 1        | 0        | 0        | 0        | 0        | 1        |     |                                                      |      |      |     |     |     |       |                   |  |
| C*08:56                                                  | 08:56              | HLA07363  |                                               | 0        | 1        | 0        | 0        | 0        | 0        | 0        | 1        |     |                                                      |      |      |     |     |     |       |                   |  |
| C*08:57                                                  | 08:57              | HLA07489  |                                               | 0        | 0        | 1        | 0        | 0        | 0        | 0        | 1        |     |                                                      |      |      |     |     |     |       |                   |  |
| C*08:62                                                  | 08:62              | HLA07938  |                                               | 0        | 0        | 1        | 0        | 2        | 0        | 0        | 3        |     |                                                      |      |      |     |     |     |       |                   |  |
| C*08:63                                                  | 08:63              | HLA08088  |                                               | 0        | 0        | 1        | 0        | 0        | 0        | 0        | 1        |     |                                                      |      |      |     |     |     |       |                   |  |
| C*08:66                                                  | 08:66              | HLA08427  |                                               | 0        | 1        | 0        | 0        | 0        | 0        | 0        | 1        |     |                                                      |      |      |     |     |     |       |                   |  |
| C*08:68                                                  | 08:68              | HLA08729  |                                               | 0        | 0        | 2        | 0        | 0        | 0        | 0        | 2        |     |                                                      |      |      |     |     |     |       |                   |  |
| C*08:69                                                  | 08:69              | HLA08731  |                                               | 0        | 0        | 1        | 2        | 0        | 0        | 0        | 3        |     |                                                      |      |      |     |     |     |       |                   |  |
| <b>C*08:72 total</b>                                     | <b>08:72 total</b> |           |                                               | <b>0</b> | <b>2</b> | <b>1</b> | <b>0</b> | <b>0</b> | <b>0</b> | <b>0</b> | <b>3</b> |     |                                                      |      |      |     |     |     |       |                   |  |
| C*08:72                                                  | 08:72              |           |                                               | 0        | 1        | 0        | 0        | 0        | 0        | 0        | 1        |     |                                                      |      |      |     |     |     |       |                   |  |
| C*08:72:01                                               | 08:72:01           | HLA08741  |                                               | 0        | 1        | 0        | 0        | 0        | 0        | 0        | 1        |     |                                                      |      |      |     |     |     |       |                   |  |
| C*08:72:02                                               | 08:72:02           | HLA09610  |                                               | 0        | 0        | 1        | 0        | 0        | 0        | 0        | 1        |     |                                                      |      |      |     |     |     |       |                   |  |
| C*08:73                                                  | 08:73              | HLA09023  |                                               | 0        | 0        | 1        | 0        | 0        | 0        | 0        | 1        |     |                                                      |      |      |     |     |     |       |                   |  |
| C*08:74                                                  | 08:74              | HLA09051  |                                               | 0        | 0        | 0        | 0        | 0        | 0        | 3        | 3        |     |                                                      |      |      |     |     |     |       |                   |  |
| C*08:76                                                  | 08:76              | HLA09166  |                                               | 0        | 0        | 1        | 0        | 2        | 0        | 2        | 5        |     |                                                      |      |      |     |     |     | WD    | WD                |  |
| C*08:90                                                  | 08:90              | HLA10077  |                                               | 0        | 0        | 1        | 0        | 0        | 0        | 0        | 1        |     |                                                      |      |      |     |     |     |       |                   |  |
| C*08:91                                                  | 08:91              | HLA10078  |                                               | 0        | 1        | 0        | 0        | 0        | 0        | 0        | 1        |     |                                                      |      |      |     |     |     |       |                   |  |
| C*08:92                                                  | 08:92              | HLA10080  |                                               | 0        | 0        | 9        | 0        | 0        | 0        | 0        | 9        |     |                                                      | WD   |      |     |     |     | WD    | WD                |  |
| C*08:93                                                  | 08:93              | HLA10081  |                                               | 0        | 0        | 1        | 0        | 0        | 0        | 0        | 1        |     |                                                      |      |      |     |     |     |       |                   |  |
| C*08:94                                                  | 08:94              | HLA10260  |                                               | 0        | 0        | 3        | 0        | 1        | 0        | 0        | 4        |     |                                                      |      |      |     |     |     |       |                   |  |
| C*08:95                                                  | 08:95              | HLA10615  |                                               | 0        | 2        | 0        | 0        | 0        | 0        | 0        | 2        |     |                                                      |      |      |     |     |     |       |                   |  |
| C*08:103                                                 | 08:103             | HLA10915  |                                               | 0        | 0        | 5        | 0        | 0        | 0        | 1        | 6        |     |                                                      | WD   |      |     |     |     | WD    | WD                |  |
| C*08:107                                                 | 08:107             | HLA11859  |                                               | 0        | 0        | 4        | 0        | 0        | 0        | 0        | 4        |     |                                                      |      |      |     |     |     |       |                   |  |
| C*08:109                                                 | 08:109             | HLA11866  |                                               | 0        | 1        | 0        | 0        | 0        | 0        | 0        | 1        |     |                                                      |      |      |     |     |     |       |                   |  |
| C*08:114                                                 | 08:114             | HLA12857  |                                               | 0        | 0        | 0        | 0        | 1        | 0        | 0        | 1        |     |                                                      |      |      |     |     |     |       |                   |  |
| C*08:115                                                 | 08:115             | HLA12859  |                                               | 0        | 0        | 2        | 0        | 0        | 0        | 0        | 2        |     |                                                      |      |      |     |     |     |       |                   |  |
| C*08:116                                                 | 08:116             | HLA13044  |                                               | 0        | 0        | 0        | 0        | 0        | 0        | 1        | 1        |     |                                                      |      |      |     |     |     |       |                   |  |
| C*08:117                                                 | 08:117             | HLA13098  |                                               | 0        | 0        | 0        | 0        | 0        | 0        | 1        | 1        |     |                                                      |      |      |     |     |     |       |                   |  |
| C*08:119                                                 | 08:119             | HLA13269  |                                               | 0        | 0        | 0        | 0        | 3        | 0        | 0        | 3        |     |                                                      |      |      |     |     |     |       |                   |  |
| C*08:122                                                 | 08:122             | HLA13750  |                                               | 0        | 1        | 0        | 0        | 0        | 0        | 0        | 1        |     |                                                      |      |      |     |     |     |       |                   |  |

| Supplemental Table 10: HLA-C Allele Summary <sup>a</sup> |                        |           | Allele Count by Population Group <sup>b</sup> |             |              |               |              |              |             |              |               | 3.0.0 CIWD Category by Population Group <sup>c</sup> |          |          |          |          |          |          |          |                   |
|----------------------------------------------------------|------------------------|-----------|-----------------------------------------------|-------------|--------------|---------------|--------------|--------------|-------------|--------------|---------------|------------------------------------------------------|----------|----------|----------|----------|----------|----------|----------|-------------------|
| Allele                                                   | Genomic typing         | Allele ID | G group                                       | AFA         | API          | EURO          | MENA         | HIS          | NAM         | UNK          | Total         | AFA                                                  | API      | EURO     | MENA     | HIS      | NAM      | UNK      | Total    | Highest Frequency |
| C*08:127N                                                | 08:127N                | HLA14203  |                                               | 0           | 5            | 0             | 0            | 0            | 0           | 0            | 5             |                                                      | WD       |          |          |          |          |          | WD       | WD                |
| C*08:CODE                                                | 08:CODE                |           |                                               | 1435        | 4278         | 29018         | 493          | 5340         | 451         | 5544         | 46559         | NA                                                   | NA       | NA       | NA       | NA       | NA       | NA       | NA       | NA                |
| <b>C*12:02 total</b>                                     | <b>12:02 total</b>     |           |                                               | <b>848</b>  | <b>87577</b> | <b>112273</b> | <b>14088</b> | <b>6491</b>  | <b>714</b>  | <b>21167</b> | <b>243158</b> | <b>C</b>                                             | <b>C</b> | <b>C</b> | <b>C</b> | <b>C</b> | <b>C</b> | <b>C</b> | <b>C</b> | <b>C</b>          |
| C*12:02                                                  | 12:02                  |           |                                               | 388         | 7482         | 29379         | 4377         | 2833         | 417         | 14364        | 59240         | C                                                    | C        | C        | C        | C        | C        | C        | C        | C                 |
| C*12:02P                                                 | 12:02P                 |           |                                               | 0           | 2            | 68            | 0            | 0            | 0           | 0            | 70            |                                                      |          | WD       |          |          |          |          | WD       | WD                |
| <b>C*12:02:01G total</b>                                 | <b>12:02:01G total</b> |           |                                               | <b>460</b>  | <b>80065</b> | <b>82811</b>  | <b>9711</b>  | <b>3658</b>  | <b>297</b>  | <b>6802</b>  | <b>183804</b> | <b>C</b>                                             | <b>C</b> | <b>C</b> | <b>C</b> | <b>C</b> | <b>C</b> | <b>C</b> | <b>C</b> | <b>C</b>          |
| C*12:02:01G                                              | 12:02:01G              |           | 12:02:01G                                     | 294         | 73514        | 77402         | 9121         | 1546         | 78          | 5000         | 166955        | C                                                    | C        | C        | C        | C        | C        | C        | C        | C                 |
| C*12:02:01                                               | 12:02:01               | HLA00453  | 12:02:01G                                     | 0           | 1            | 6             | 0            | 0            | 0           | 2            | 9             |                                                      |          | WD       |          |          |          |          | WD       | WD                |
| C*12:02:02                                               | 12:02:02               |           | 12:02:01G                                     | 166         | 6550         | 5355          | 590          | 2112         | 219         | 1799         | 16791         | C                                                    | C        | C        | C        | C        | C        | C        | C        | C                 |
| C*12:02:02:01                                            | 12:02:02:01            | HLA00454  | 12:02:01G                                     | 0           | 0            | 48            | 0            | 0            | 0           | 0            | 48            |                                                      |          | WD       |          |          |          |          | WD       | WD                |
| C*12:02:02:03                                            | 12:02:02:03            | HLA17159  | 12:02:01G                                     | 0           | 0            | 0             | 0            | 0            | 0           | 1            | 1             |                                                      |          |          |          |          |          |          |          |                   |
| C*12:02:03                                               | 12:02:03               | HLA01145  |                                               | 0           | 10           | 7             | 0            | 0            | 0           | 0            | 17            |                                                      | WD       | WD       |          |          |          |          | WD       | WD                |
| C*12:02:04                                               | 12:02:04               | HLA04620  |                                               | 0           | 8            | 0             | 0            | 0            | 0           | 0            | 8             |                                                      | WD       |          |          |          |          |          | WD       | WD                |
| C*12:02:06                                               | 12:02:06               | HLA05178  |                                               | 0           | 0            | 2             | 0            | 0            | 0           | 0            | 2             |                                                      |          |          |          |          |          |          |          |                   |
| C*12:02:07                                               | 12:02:07               | HLA07137  |                                               | 0           | 2            | 0             | 0            | 0            | 0           | 0            | 2             |                                                      |          |          |          |          |          |          |          |                   |
| C*12:02:08                                               | 12:02:08               | HLA07555  |                                               | 0           | 0            | 5             | 0            | 0            | 0           | 0            | 5             |                                                      |          | WD       |          |          |          |          | WD       | WD                |
| C*12:02:09                                               | 12:02:09               | HLA07785  |                                               | 0           | 2            | 0             | 0            | 0            | 0           | 0            | 2             |                                                      |          |          |          |          |          |          |          |                   |
| C*12:02:11                                               | 12:02:11               | HLA10435  |                                               | 0           | 1            | 0             | 0            | 0            | 0           | 0            | 1             |                                                      |          |          |          |          |          |          |          |                   |
| C*12:02:13                                               | 12:02:13               | HLA12336  |                                               | 0           | 3            | 0             | 0            | 0            | 0           | 0            | 3             |                                                      |          |          |          |          |          |          |          |                   |
| C*12:02:14                                               | 12:02:14               | HLA15132  |                                               | 0           | 2            | 1             | 0            | 0            | 0           | 1            | 4             |                                                      |          |          |          |          |          |          |          |                   |
| <b>C*12:03 total</b>                                     | <b>12:03 total</b>     |           |                                               | <b>6249</b> | <b>41920</b> | <b>689079</b> | <b>36904</b> | <b>26856</b> | <b>2107</b> | <b>71883</b> | <b>874998</b> | <b>C</b>                                             | <b>C</b> | <b>C</b> | <b>C</b> | <b>C</b> | <b>C</b> | <b>C</b> | <b>C</b> | <b>C</b>          |
| C*12:03                                                  | 12:03                  |           |                                               | 18          | 38           | 11512         | 362          | 30           | 9           | 942          | 12911         | WD                                                   | I        | C        | C        | I        | C        | C        | C        | C                 |
| C*12:03P                                                 | 12:03P                 |           |                                               | 5           | 30           | 2573          | 325          | 3            | 1           | 1374         | 4311          | WD                                                   | I        | C        | C        |          |          | C        | C        | C                 |
| <b>C*12:03:01G total</b>                                 | <b>12:03:01G total</b> |           |                                               | <b>6226</b> | <b>41830</b> | <b>674713</b> | <b>35856</b> | <b>26818</b> | <b>2097</b> | <b>69541</b> | <b>857081</b> | <b>C</b>                                             | <b>C</b> | <b>C</b> | <b>C</b> | <b>C</b> | <b>C</b> | <b>C</b> | <b>C</b> | <b>C</b>          |
| C*12:03:01G                                              | 12:03:01G              |           | 12:03:01G                                     | 5104        | 39262        | 649953        | 34917        | 20360        | 1561        | 66336        | 817493        | C                                                    | C        | C        | C        | C        | C        | C        | C        | C                 |
| C*12:03:01                                               | 12:03:01               |           | 12:03:01G                                     | 312         | 710          | 8078          | 297          | 1967         | 136         | 961          | 12461         | C                                                    | C        | C        | C        | C        | C        | C        | C        | C                 |
| C*12:03:01:01                                            | 12:03:01:01            | HLA00455  | 12:03:01G                                     | 758         | 1856         | 16547         | 640          | 4445         | 396         | 2221         | 26863         | C                                                    | C        | C        | C        | C        | C        | C        | C        | C                 |
| C*12:03:01:02                                            | 12:03:01:02            | HLA02766  | 12:03:01G                                     | 44          | 0            | 0             | 0            | 11           | 3           | 9            | 67            | C                                                    |          |          |          | I        |          | WD       | WD       | C                 |
| C*12:03:01:07                                            | 12:03:01:07            | HLA16176  | 12:03:01G                                     | 0           | 0            | 2             | 0            | 0            | 0           | 0            | 2             |                                                      |          |          |          |          |          |          |          |                   |
| C*12:03:01:08                                            | 12:03:01:08            | HLA17050  | 12:03:01G                                     | 0           | 0            | 1             | 0            | 0            | 0           | 0            | 1             |                                                      |          |          |          |          |          |          |          |                   |
| C*12:03:01:09                                            | 12:03:01:09            | HLA17073  | 12:03:01G                                     | 0           | 0            | 2             | 0            | 0            | 0           | 0            | 2             |                                                      |          |          |          |          |          |          |          |                   |



| Supplemental Table 10: HLA-C Allele Summary <sup>a</sup> |                        |           |           | Allele Count by Population Group <sup>b</sup> |          |          |          |          |          |          |          | 3.0.0 CIWD Category by Population Group <sup>c</sup> |     |      |      |     |     |     |       |                   |  |
|----------------------------------------------------------|------------------------|-----------|-----------|-----------------------------------------------|----------|----------|----------|----------|----------|----------|----------|------------------------------------------------------|-----|------|------|-----|-----|-----|-------|-------------------|--|
| Allele                                                   | Genomic typing         | Allele ID | G group   | AFA                                           | API      | EURO     | MENA     | HIS      | NAM      | UNK      | Total    | AFA                                                  | API | EURO | MENA | HIS | NAM | UNK | Total | Highest Frequency |  |
| C*12:03:06                                               | 12:03:06               | HLA03285  | 12:03:01G | 0                                             | 1        | 42       | 1        | 19       | 0        | 6        | 69       |                                                      |     | WD   |      | I   |     | WD  | WD    | I                 |  |
| C*12:23                                                  | 12:23                  | HLA03988  | 12:03:01G | 1                                             | 0        | 2        | 0        | 7        | 0        | 1        | 11       |                                                      |     |      |      | I   |     |     | WD    | I                 |  |
| C*12:109                                                 | 12:109                 | HLA10136  | 12:03:01G | 0                                             | 1        | 0        | 0        | 1        | 0        | 0        | 2        |                                                      |     |      |      |     |     |     |       |                   |  |
| C*12:125                                                 | 12:125                 | HLA11490  | 12:03:01G | 0                                             | 0        | 2        | 0        | 0        | 0        | 1        | 3        |                                                      |     |      |      |     |     |     |       |                   |  |
| C*12:143                                                 | 12:143                 | HLA12837  | 12:03:01G | 2                                             | 0        | 80       | 0        | 6        | 1        | 6        | 95       |                                                      |     | WD   |      | WD  |     | WD  | WD    | WD                |  |
| C*12:160                                                 | 12:160                 | HLA13502  | 12:03:01G | 0                                             | 0        | 0        | 0        | 1        | 0        | 0        | 1        |                                                      |     |      |      |     |     |     |       |                   |  |
| C*12:167                                                 | 12:167                 | HLA14117  | 12:03:01G | 5                                             | 0        | 4        | 1        | 1        | 0        | 0        | 11       | WD                                                   |     |      |      |     |     |     | WD    | WD                |  |
| C*12:03:03                                               | 12:03:03               | HLA01885  |           | 0                                             | 1        | 37       | 1        | 3        | 0        | 8        | 50       |                                                      |     | WD   |      |     |     | WD  | WD    | WD                |  |
| C*12:03:04                                               | 12:03:04               | HLA02428  |           | 0                                             | 1        | 4        | 0        | 0        | 0        | 0        | 5        |                                                      |     |      |      |     |     |     | WD    | WD                |  |
| C*12:03:05                                               | 12:03:05               | HLA03127  |           | 0                                             | 0        | 68       | 0        | 0        | 0        | 0        | 68       |                                                      |     | WD   |      |     |     |     | WD    | WD                |  |
| C*12:03:08                                               | 12:03:08               | HLA04337  |           | 0                                             | 8        | 33       | 353      | 1        | 0        | 10       | 405      |                                                      | WD  | WD   | C    |     |     | WD  | I     | C                 |  |
| C*12:03:09                                               | 12:03:09               | HLA04600  |           | 0                                             | 4        | 8        | 0        | 0        | 0        | 0        | 12       |                                                      |     | WD   |      |     |     |     | WD    | WD                |  |
| C*12:03:10                                               | 12:03:10               | HLA04836  |           | 0                                             | 0        | 46       | 1        | 0        | 0        | 0        | 47       |                                                      |     | WD   |      |     |     |     | WD    | WD                |  |
| C*12:03:11                                               | 12:03:11               | HLA04840  |           | 0                                             | 0        | 13       | 0        | 0        | 0        | 0        | 13       |                                                      |     | WD   |      |     |     |     | WD    | WD                |  |
| C*12:03:12                                               | 12:03:12               | HLA05172  |           | 0                                             | 0        | 0        | 2        | 0        | 0        | 1        | 3        |                                                      |     |      |      |     |     |     |       |                   |  |
| C*12:03:13                                               | 12:03:13               | HLA05565  |           | 0                                             | 0        | 1        | 0        | 0        | 0        | 0        | 1        |                                                      |     |      |      |     |     |     |       |                   |  |
| C*12:03:15                                               | 12:03:15               | HLA06001  |           | 0                                             | 0        | 5        | 0        | 0        | 0        | 0        | 5        |                                                      |     | WD   |      |     |     |     | WD    | WD                |  |
| C*12:03:17                                               | 12:03:17               | HLA07064  |           | 0                                             | 1        | 2        | 3        | 1        | 0        | 0        | 7        |                                                      |     |      |      |     |     |     | WD    | WD                |  |
| C*12:03:18                                               | 12:03:18               | HLA07123  |           | 0                                             | 0        | 37       | 0        | 0        | 0        | 0        | 37       |                                                      |     | WD   |      |     |     |     | WD    | WD                |  |
| C*12:03:19                                               | 12:03:19               | HLA07230  |           | 0                                             | 2        | 1        | 0        | 0        | 0        | 0        | 3        |                                                      |     |      |      |     |     |     |       |                   |  |
| C*12:03:20                                               | 12:03:20               | HLA07318  |           | 0                                             | 0        | 2        | 0        | 0        | 0        | 0        | 2        |                                                      |     |      |      |     |     |     |       |                   |  |
| C*12:03:21                                               | 12:03:21               | HLA07853  |           | 0                                             | 0        | 1        | 0        | 0        | 0        | 0        | 1        |                                                      |     |      |      |     |     |     |       |                   |  |
| C*12:03:22                                               | 12:03:22               | HLA07855  |           | 0                                             | 0        | 0        | 1        | 0        | 0        | 0        | 1        |                                                      |     |      |      |     |     |     |       |                   |  |
| C*12:03:23                                               | 12:03:23               | HLA08535  |           | 0                                             | 0        | 4        | 0        | 0        | 0        | 0        | 4        |                                                      |     |      |      |     |     |     |       |                   |  |
| C*12:03:25                                               | 12:03:25               | HLA08752  |           | 0                                             | 0        | 1        | 0        | 0        | 0        | 0        | 1        |                                                      |     |      |      |     |     |     |       |                   |  |
| C*12:03:26                                               | 12:03:26               | HLA10082  |           | 0                                             | 4        | 1        | 0        | 0        | 0        | 0        | 5        |                                                      |     |      |      |     |     |     | WD    | WD                |  |
| C*12:03:27                                               | 12:03:27               | HLA10088  |           | 0                                             | 0        | 2        | 0        | 0        | 0        | 0        | 2        |                                                      |     |      |      |     |     |     |       |                   |  |
| C*12:03:29                                               | 12:03:29               | HLA10434  |           | 0                                             | 0        | 9        | 0        | 0        | 0        | 1        | 10       |                                                      |     | WD   |      |     |     |     | WD    | WD                |  |
| C*12:03:32                                               | 12:03:32               | HLA12773  |           | 0                                             | 1        | 1        | 0        | 0        | 0        | 0        | 2        |                                                      |     |      |      |     |     |     |       |                   |  |
| <b>C*12:03:34G total</b>                                 | <b>12:03:34G total</b> |           |           | <b>0</b>                                      | <b>0</b> | <b>2</b> | <b>0</b> | <b>0</b> | <b>0</b> | <b>0</b> | <b>2</b> |                                                      |     |      |      |     |     |     |       |                   |  |
| C*12:03:34G                                              | 12:03:34G              |           | 12:03:34G | 0                                             | 0        | 1        | 0        | 0        | 0        | 0        | 1        |                                                      |     |      |      |     |     |     |       |                   |  |

| Supplemental Table 10: HLA-C Allele Summary <sup>a</sup> |                    |           | Allele Count by Population Group <sup>b</sup> |           |             |            |           |           |          |            |             | 3.0.0 CIWD Category by Population Group <sup>c</sup> |          |           |           |          |          |          |           |                   |
|----------------------------------------------------------|--------------------|-----------|-----------------------------------------------|-----------|-------------|------------|-----------|-----------|----------|------------|-------------|------------------------------------------------------|----------|-----------|-----------|----------|----------|----------|-----------|-------------------|
| Allele                                                   | Genomic typing     | Allele ID | G group                                       | AFA       | API         | EURO       | MENA      | HIS       | NAM      | UNK        | Total       | AFA                                                  | API      | EURO      | MENA      | HIS      | NAM      | UNK      | Total     | Highest Frequency |
| C*12:03:34                                               | 12:03:34           |           | 12:03:34G                                     | 0         | 0           | 1          | 0         | 0         | 0        | 0          | 1           |                                                      |          |           |           |          |          |          |           |                   |
| C*12:03:35                                               | 12:03:35           | HLA13101  |                                               | 0         | 0           | 1          | 0         | 0         | 0        | 6          | 7           |                                                      |          |           |           |          |          | WD       | WD        | WD                |
| C*12:03:37                                               | 12:03:37           | HLA13531  |                                               | 0         | 0           | 1          | 0         | 0         | 0        | 0          | 1           |                                                      |          |           |           |          |          |          |           |                   |
| C*12:03:41                                               | 12:03:41           | HLA16273  |                                               | 0         | 0           | 1          | 0         | 0         | 0        | 0          | 1           |                                                      |          |           |           |          |          |          |           |                   |
| <b>C*12:04 total</b>                                     | <b>12:04 total</b> |           |                                               | <b>10</b> | <b>4152</b> | <b>208</b> | <b>12</b> | <b>25</b> | <b>8</b> | <b>336</b> | <b>4751</b> | <b>WD</b>                                            | <b>C</b> | <b>I</b>  | <b>WD</b> | <b>I</b> | <b>C</b> | <b>C</b> | <b>C</b>  | <b>C</b>          |
| C*12:04                                                  | 12:04              |           |                                               | 1         | 75          | 34         | 1         | 2         | 0        | 14         | 127         |                                                      | I        | WD        |           |          |          | I        | WD        | I                 |
| C*12:04:01                                               | 12:04:01           | HLA00456  |                                               | 0         | 0           | 6          | 1         | 0         | 0        | 0          | 7           |                                                      |          | WD        |           |          |          |          | WD        | WD                |
| C*12:04:02                                               | 12:04:02           | HLA00457  |                                               | 9         | 4077        | 168        | 10        | 23        | 8        | 322        | 4617        | WD                                                   | C        | I         | WD        | I        | C        | C        | C         | C                 |
| C*12:05                                                  | 12:05              | HLA00458  |                                               | 7         | 198         | 1140       | 460       | 34        | 2        | 75         | 1916        | WD                                                   | C        | I         | C         | I        |          | I        | C         | C                 |
| C*12:06                                                  | 12:06              | HLA00459  |                                               | 0         | 0           | 14         | 0         | 0         | 0        | 1          | 15          |                                                      |          | WD        |           |          |          |          | WD        | WD                |
| C*12:07                                                  | 12:07              | HLA01138  |                                               | 9         | 0           | 1          | 0         | 0         | 0        | 2          | 12          | WD                                                   |          |           |           |          |          |          | WD        | WD                |
| C*12:08                                                  | 12:08              | HLA01413  |                                               | 0         | 4           | 1          | 0         | 0         | 0        | 0          | 5           |                                                      |          |           |           |          |          |          | WD        | WD                |
| C*12:09                                                  | 12:09              | HLA01705  |                                               | 2         | 478         | 13         | 12        | 0         | 0        | 22         | 527         |                                                      | C        | WD        | WD        |          |          | I        | I         | C                 |
| C*12:11                                                  | 12:11              | HLA01799  |                                               | 0         | 1           | 21         | 1         | 0         | 0        | 0          | 23          |                                                      |          | WD        |           |          |          |          | WD        | WD                |
| C*12:12                                                  | 12:12              | HLA01878  |                                               | 11        | 0           | 66         | 6         | 112       | 19       | 30         | 244         | WD                                                   |          | WD        | WD        | C        | C        | I        | I         | C                 |
| C*12:13                                                  | 12:13              | HLA01954  |                                               | 2         | 1           | 289        | 0         | 4         | 0        | 31         | 327         |                                                      |          | I         |           |          |          | I        | I         | I                 |
| <b>C*12:14 total</b>                                     | <b>12:14 total</b> |           |                                               | <b>0</b>  | <b>0</b>    | <b>6</b>   | <b>1</b>  | <b>0</b>  | <b>0</b> | <b>0</b>   | <b>7</b>    |                                                      |          | <b>WD</b> |           |          |          |          | <b>WD</b> | <b>WD</b>         |
| C*12:14:01                                               | 12:14:01           | HLA01935  |                                               | 0         | 0           | 6          | 0         | 0         | 0        | 0          | 6           |                                                      |          | WD        |           |          |          |          | WD        | WD                |
| C*12:181                                                 | 12:181             | HLA15168  |                                               | 0         | 0           | 0          | 1         | 0         | 0        | 0          | 1           |                                                      |          |           |           |          |          |          |           |                   |
| C*12:15                                                  | 12:15              | HLA01969  |                                               | 0         | 0           | 1          | 0         | 0         | 0        | 0          | 1           |                                                      |          |           |           |          |          |          |           |                   |
| C*12:16                                                  | 12:16              | HLA02304  |                                               | 0         | 3           | 1095       | 3         | 1         | 0        | 9          | 1111        |                                                      |          | I         |           |          |          | WD       | I         | I                 |
| <b>C*12:18 total</b>                                     | <b>12:18 total</b> |           |                                               | <b>0</b>  | <b>36</b>   | <b>4</b>   | <b>2</b>  | <b>0</b>  | <b>0</b> | <b>2</b>   | <b>44</b>   |                                                      | <b>I</b> |           |           |          |          |          | <b>WD</b> | <b>I</b>          |
| C*12:18                                                  | 12:18              |           |                                               | 0         | 5           | 1          | 0         | 0         | 0        | 0          | 6           |                                                      | WD       |           |           |          |          |          | WD        | WD                |
| C*12:18:01                                               | 12:18:01           | HLA02527  |                                               | 0         | 30          | 3          | 2         | 0         | 0        | 2          | 37          |                                                      | I        |           |           |          |          |          | WD        | I                 |
| C*12:18:02                                               | 12:18:02           | HLA07783  |                                               | 0         | 1           | 0          | 0         | 0         | 0        | 0          | 1           |                                                      |          |           |           |          |          |          |           |                   |
| C*12:19                                                  | 12:19              | HLA02605  |                                               | 19        | 0           | 0          | 0         | 0         | 1        | 3          | 23          | WD                                                   |          |           |           |          |          |          | WD        | WD                |
| C*12:20                                                  | 12:20              | HLA02791  |                                               | 0         | 2           | 3          | 0         | 0         | 0        | 1          | 6           |                                                      |          |           |           |          |          |          | WD        | WD                |
| C*12:21                                                  | 12:21              | HLA02842  |                                               | 0         | 1           | 37         | 0         | 0         | 0        | 0          | 38          |                                                      |          | WD        |           |          |          |          | WD        | WD                |
| C*12:24                                                  | 12:24              | HLA04129  |                                               | 0         | 3           | 42         | 3         | 0         | 0        | 5          | 53          |                                                      |          | WD        |           |          |          | WD       | WD        | WD                |
| C*12:25                                                  | 12:25              | HLA04313  |                                               | 0         | 0           | 1          | 0         | 0         | 0        | 0          | 1           |                                                      |          |           |           |          |          |          |           |                   |
| C*12:27                                                  | 12:27              | HLA04334  |                                               | 0         | 0           | 1          | 23        | 0         | 0        | 0          | 24          |                                                      |          |           | WD        |          |          |          | WD        | WD                |

| Supplemental Table 10: HLA-C Allele Summary <sup>a</sup> |                    |           | Allele Count by Population Group <sup>b</sup> |          |          |          |          |          |          |          |          |     | 3.0.0 CIWD Category by Population Group <sup>c</sup> |      |      |     |     |     |       |                   |
|----------------------------------------------------------|--------------------|-----------|-----------------------------------------------|----------|----------|----------|----------|----------|----------|----------|----------|-----|------------------------------------------------------|------|------|-----|-----|-----|-------|-------------------|
| Allele                                                   | Genomic typing     | Allele ID | G group                                       | AFA      | API      | EURO     | MENA     | HIS      | NAM      | UNK      | Total    | AFA | API                                                  | EURO | MENA | HIS | NAM | UNK | Total | Highest Frequency |
| C*12:28                                                  | 12:28              | HLA04336  |                                               | 0        | 0        | 31       | 0        | 0        | 0        | 1        | 32       |     |                                                      | WD   |      |     |     |     | WD    | WD                |
| C*12:29                                                  | 12:29              | HLA04591  |                                               | 0        | 0        | 2        | 0        | 0        | 0        | 0        | 2        |     |                                                      |      |      |     |     |     |       |                   |
| C*12:30                                                  | 12:30              | HLA04592  |                                               | 0        | 0        | 178      | 0        | 0        | 0        | 0        | 178      |     |                                                      | I    |      |     |     |     | I     | I                 |
| C*12:33                                                  | 12:33              | HLA04766  |                                               | 0        | 0        | 8        | 0        | 1        | 0        | 0        | 9        |     |                                                      | WD   |      |     |     |     | WD    | WD                |
| C*12:34                                                  | 12:34              | HLA04825  |                                               | 0        | 0        | 328      | 0        | 0        | 0        | 5        | 333      |     |                                                      | I    |      |     |     | WD  | I     | I                 |
| C*12:35                                                  | 12:35              | HLA04834  |                                               | 0        | 0        | 2        | 0        | 0        | 0        | 0        | 2        |     |                                                      |      |      |     |     |     |       |                   |
| C*12:36                                                  | 12:36              | HLA05185  |                                               | 0        | 0        | 0        | 1        | 0        | 0        | 0        | 1        |     |                                                      |      |      |     |     |     |       |                   |
| C*12:38                                                  | 12:38              | HLA05199  |                                               | 0        | 15       | 1        | 0        | 0        | 0        | 1        | 17       |     | I                                                    |      |      |     |     |     | WD    | I                 |
| C*12:40                                                  | 12:40              | HLA05204  |                                               | 0        | 5        | 0        | 0        | 0        | 0        | 0        | 5        |     | WD                                                   |      |      |     |     |     | WD    | WD                |
| C*12:41                                                  | 12:41              | HLA05205  |                                               | 0        | 19       | 0        | 0        | 0        | 0        | 0        | 19       |     | I                                                    |      |      |     |     |     | WD    | I                 |
| C*12:42Q                                                 | 12:42Q             | HLA05212  |                                               | 0        | 0        | 26       | 0        | 0        | 0        | 1        | 27       |     |                                                      | WD   |      |     |     |     | WD    | WD                |
| C*12:43                                                  | 12:43              | HLA05214  |                                               | 0        | 0        | 26       | 1        | 0        | 0        | 0        | 27       |     |                                                      | WD   |      |     |     |     | WD    | WD                |
| C*12:45                                                  | 12:45              | HLA05570  |                                               | 0        | 0        | 51       | 1        | 0        | 0        | 1        | 53       |     |                                                      | WD   |      |     |     |     | WD    | WD                |
| C*12:46N                                                 | 12:46N             | HLA05575  |                                               | 0        | 0        | 1        | 0        | 0        | 0        | 0        | 1        |     |                                                      |      |      |     |     |     |       |                   |
| C*12:47                                                  | 12:47              | HLA05595  |                                               | 0        | 0        | 5        | 0        | 2        | 1        | 6        | 14       |     |                                                      | WD   |      |     |     | WD  | WD    | WD                |
| C*12:48                                                  | 12:48              | HLA05608  |                                               | 0        | 0        | 7        | 0        | 0        | 0        | 0        | 7        |     |                                                      | WD   |      |     |     |     | WD    | WD                |
| C*12:49                                                  | 12:49              | HLA05751  |                                               | 0        | 2        | 1        | 0        | 0        | 0        | 0        | 3        |     |                                                      |      |      |     |     |     |       |                   |
| C*12:50                                                  | 12:50              | HLA05837  |                                               | 0        | 0        | 3        | 0        | 0        | 0        | 0        | 3        |     |                                                      |      |      |     |     |     |       |                   |
| C*12:51                                                  | 12:51              | HLA06136  |                                               | 0        | 0        | 1        | 0        | 0        | 0        | 0        | 1        |     |                                                      |      |      |     |     |     |       |                   |
| C*12:54                                                  | 12:54              | HLA06414  |                                               | 0        | 6        | 29       | 0        | 0        | 0        | 0        | 35       |     | WD                                                   | WD   |      |     |     |     | WD    | WD                |
| <b>C*12:57 total</b>                                     | <b>12:57 total</b> |           |                                               | <b>0</b> | <b>0</b> | <b>0</b> | <b>1</b> | <b>0</b> | <b>0</b> | <b>0</b> | <b>1</b> |     |                                                      |      |      |     |     |     |       |                   |
| C*12:57                                                  | 12:57              |           |                                               | 0        | 0        | 0        | 1        | 0        | 0        | 0        | 1        |     |                                                      |      |      |     |     |     |       |                   |
| C*12:58                                                  | 12:58              | HLA06582  |                                               | 0        | 0        | 2        | 0        | 0        | 0        | 0        | 2        |     |                                                      |      |      |     |     |     |       |                   |
| C*12:59                                                  | 12:59              | HLA06722  |                                               | 9        | 0        | 0        | 0        | 4        | 0        | 2        | 15       | WD  |                                                      |      |      |     |     |     | WD    | WD                |
| C*12:60                                                  | 12:60              | HLA06897  |                                               | 0        | 20       | 0        | 0        | 0        | 0        | 0        | 20       |     | I                                                    |      |      |     |     |     | WD    | I                 |
| C*12:61                                                  | 12:61              | HLA07055  |                                               | 0        | 0        | 3        | 3        | 0        | 0        | 0        | 6        |     |                                                      |      |      |     |     |     | WD    | WD                |
| C*12:62                                                  | 12:62              | HLA07062  |                                               | 0        | 0        | 12       | 0        | 0        | 0        | 0        | 12       |     |                                                      | WD   |      |     |     |     | WD    | WD                |
| C*12:64                                                  | 12:64              | HLA07083  |                                               | 0        | 4        | 1        | 0        | 0        | 0        | 0        | 5        |     |                                                      |      |      |     |     |     | WD    | WD                |
| C*12:67                                                  | 12:67              | HLA07223  |                                               | 0        | 0        | 6        | 0        | 0        | 0        | 0        | 6        |     |                                                      | WD   |      |     |     |     | WD    | WD                |
| C*12:68                                                  | 12:68              | HLA07232  |                                               | 0        | 0        | 4        | 0        | 0        | 0        | 0        | 4        |     |                                                      |      |      |     |     |     |       |                   |
| C*12:71                                                  | 12:71              | HLA07741  |                                               | 0        | 2        | 0        | 0        | 0        | 0        | 0        | 2        |     |                                                      |      |      |     |     |     |       |                   |

| Supplemental Table 10: HLA-C Allele Summary <sup>a</sup> |                    |           | Allele Count by Population Group <sup>b</sup> |          |          |           |          |          |          |          |           | 3.0.0 CIWD Category by Population Group <sup>c</sup> |     |           |      |     |     |           |           |                   |
|----------------------------------------------------------|--------------------|-----------|-----------------------------------------------|----------|----------|-----------|----------|----------|----------|----------|-----------|------------------------------------------------------|-----|-----------|------|-----|-----|-----------|-----------|-------------------|
| Allele                                                   | Genomic typing     | Allele ID | G group                                       | AFA      | API      | EURO      | MENA     | HIS      | NAM      | UNK      | Total     | AFA                                                  | API | EURO      | MENA | HIS | NAM | UNK       | Total     | Highest Frequency |
| C*12:72                                                  | 12:72              | HLA07745  |                                               | 1        | 13       | 0         | 0        | 0        | 0        | 0        | 14        |                                                      | I   |           |      |     |     |           | WD        | I                 |
| C*12:73                                                  | 12:73              | HLA07782  |                                               | 0        | 0        | 0         | 0        | 2        | 0        | 0        | 2         |                                                      |     |           |      |     |     |           |           |                   |
| C*12:77                                                  | 12:77              | HLA07852  |                                               | 0        | 0        | 1         | 0        | 0        | 0        | 0        | 1         |                                                      |     |           |      |     |     |           |           |                   |
| C*12:78                                                  | 12:78              | HLA07854  |                                               | 0        | 0        | 4         | 0        | 0        | 0        | 1        | 5         |                                                      |     |           |      |     |     |           | WD        | WD                |
| C*12:82                                                  | 12:82              | HLA08218  |                                               | 0        | 0        | 2         | 0        | 0        | 0        | 0        | 2         |                                                      |     |           |      |     |     |           |           |                   |
| C*12:85                                                  | 12:85              | HLA08426  |                                               | 0        | 1        | 2         | 0        | 0        | 0        | 1        | 4         |                                                      |     |           |      |     |     |           |           |                   |
| C*12:86                                                  | 12:86              | HLA08744  |                                               | 0        | 0        | 6         | 0        | 0        | 0        | 0        | 6         |                                                      |     | WD        |      |     |     |           | WD        | WD                |
| C*12:87                                                  | 12:87              | HLA08745  |                                               | 0        | 0        | 3         | 0        | 0        | 0        | 0        | 3         |                                                      |     |           |      |     |     |           |           |                   |
| C*12:90                                                  | 12:90              | HLA08748  |                                               | 0        | 0        | 9         | 0        | 0        | 0        | 0        | 9         |                                                      |     | WD        |      |     |     |           | WD        | WD                |
| C*12:92                                                  | 12:92              | HLA08893  |                                               | 0        | 0        | 2         | 0        | 0        | 0        | 1        | 3         |                                                      |     |           |      |     |     |           |           |                   |
| C*12:94                                                  | 12:94              | HLA09086  |                                               | 0        | 0        | 4         | 0        | 0        | 0        | 0        | 4         |                                                      |     |           |      |     |     |           |           |                   |
| C*12:98                                                  | 12:98              | HLA09613  |                                               | 0        | 0        | 1         | 36       | 0        | 0        | 6        | 43        |                                                      |     |           | WD   |     |     | WD        | WD        | WD                |
| <b>C*12:99 total</b>                                     | <b>12:99 total</b> |           |                                               | <b>0</b> | <b>0</b> | <b>22</b> | <b>0</b> | <b>0</b> | <b>0</b> | <b>0</b> | <b>22</b> |                                                      |     | <b>WD</b> |      |     |     | <b>WD</b> | <b>WD</b> | <b>WD</b>         |
| C*12:99                                                  | 12:99              |           |                                               | 0        | 0        | 16        | 0        | 0        | 0        | 0        | 16        |                                                      |     | WD        |      |     |     |           | WD        | WD                |
| C*12:99:01                                               | 12:99:01           | HLA09614  |                                               | 0        | 0        | 6         | 0        | 0        | 0        | 0        | 6         |                                                      |     | WD        |      |     |     |           | WD        | WD                |
| C*12:100                                                 | 12:100             | HLA10089  |                                               | 0        | 0        | 4         | 0        | 0        | 0        | 0        | 4         |                                                      |     |           |      |     |     |           |           |                   |
| C*12:101                                                 | 12:101             | HLA10090  |                                               | 0        | 33       | 1         | 1        | 0        | 0        | 0        | 35        |                                                      | I   |           |      |     |     |           | WD        | I                 |
| C*12:103                                                 | 12:103             | HLA10092  |                                               | 0        | 1        | 0         | 0        | 0        | 0        | 0        | 1         |                                                      |     |           |      |     |     |           |           |                   |
| C*12:119                                                 | 12:119             | HLA11102  |                                               | 0        | 0        | 1         | 0        | 0        | 0        | 0        | 1         |                                                      |     |           |      |     |     |           |           |                   |
| C*12:128                                                 | 12:128             | HLA11863  |                                               | 0        | 1        | 0         | 0        | 0        | 0        | 0        | 1         |                                                      |     |           |      |     |     |           |           |                   |
| C*12:129                                                 | 12:129             | HLA12043  |                                               | 0        | 0        | 1         | 0        | 0        | 0        | 0        | 1         |                                                      |     |           |      |     |     |           |           |                   |
| C*12:130                                                 | 12:130             | HLA12189  |                                               | 0        | 2        | 0         | 0        | 0        | 0        | 0        | 2         |                                                      |     |           |      |     |     |           |           |                   |
| C*12:132                                                 | 12:132             | HLA12192  |                                               | 0        | 3        | 1         | 0        | 0        | 0        | 0        | 4         |                                                      |     |           |      |     |     |           |           |                   |
| C*12:134                                                 | 12:134             | HLA12335  |                                               | 0        | 1        | 0         | 0        | 0        | 0        | 0        | 1         |                                                      |     |           |      |     |     |           |           |                   |
| C*12:135                                                 | 12:135             | HLA12429  |                                               | 0        | 0        | 3         | 0        | 0        | 0        | 0        | 3         |                                                      |     |           |      |     |     |           |           |                   |
| C*12:136                                                 | 12:136             | HLA12503  |                                               | 0        | 5        | 0         | 0        | 0        | 0        | 0        | 5         |                                                      | WD  |           |      |     |     |           | WD        | WD                |
| C*12:137                                                 | 12:137             | HLA12507  |                                               | 0        | 0        | 0         | 0        | 1        | 0        | 0        | 1         |                                                      |     |           |      |     |     |           |           |                   |
| C*12:139                                                 | 12:139             | HLA12709  |                                               | 0        | 0        | 0         | 5        | 0        | 0        | 0        | 5         |                                                      |     |           | WD   |     |     |           | WD        | WD                |
| C*12:144                                                 | 12:144             | HLA12774  |                                               | 0        | 0        | 1         | 0        | 0        | 0        | 0        | 1         |                                                      |     |           |      |     |     |           |           |                   |
| C*12:146                                                 | 12:146             | HLA12856  |                                               | 0        | 1        | 0         | 0        | 0        | 0        | 0        | 1         |                                                      |     |           |      |     |     |           |           |                   |
| C*12:147                                                 | 12:147             | HLA12866  |                                               | 0        | 0        | 4         | 0        | 0        | 0        | 0        | 4         |                                                      |     |           |      |     |     |           |           |                   |

| Supplemental Table 10: HLA-C Allele Summary <sup>a</sup> |                        |           | Allele Count by Population Group <sup>b</sup> |             |              |               |              |             |            |              |               |          | 3.0.0 CIWD Category by Population Group <sup>c</sup> |          |          |          |          |          |          |                   |
|----------------------------------------------------------|------------------------|-----------|-----------------------------------------------|-------------|--------------|---------------|--------------|-------------|------------|--------------|---------------|----------|------------------------------------------------------|----------|----------|----------|----------|----------|----------|-------------------|
| Allele                                                   | Genomic typing         | Allele ID | G group                                       | AFA         | API          | EURO          | MENA         | HIS         | NAM        | UNK          | Total         | AFA      | API                                                  | EURO     | MENA     | HIS      | NAM      | UNK      | Total    | Highest Frequency |
| C*12:149                                                 | 12:149                 | HLA13043  |                                               | 0           | 0            | 1             | 3            | 0           | 0          | 1            | 5             |          |                                                      |          |          |          |          |          | WD       | WD                |
| C*12:153                                                 | 12:153                 | HLA13409  |                                               | 0           | 0            | 4             | 0            | 0           | 0          | 0            | 4             |          |                                                      |          |          |          |          |          |          |                   |
| C*12:155Q                                                | 12:155Q                | HLA13416  |                                               | 0           | 0            | 1             | 0            | 0           | 0          | 0            | 1             |          |                                                      |          |          |          |          |          |          |                   |
| C*12:156                                                 | 12:156                 | HLA13419  |                                               | 0           | 1            | 2             | 0            | 0           | 0          | 0            | 3             |          |                                                      |          |          |          |          |          |          |                   |
| C*12:157                                                 | 12:157                 | HLA13565  |                                               | 0           | 0            | 1             | 0            | 0           | 0          | 0            | 1             |          |                                                      |          |          |          |          |          |          |                   |
| C*12:158                                                 | 12:158                 | HLA13566  |                                               | 0           | 0            | 1             | 0            | 0           | 0          | 0            | 1             |          |                                                      |          |          |          |          |          |          |                   |
| C*12:159                                                 | 12:159                 | HLA13567  |                                               | 0           | 2            | 0             | 0            | 0           | 0          | 0            | 2             |          |                                                      |          |          |          |          |          |          |                   |
| C*12:162                                                 | 12:162                 | HLA13754  |                                               | 0           | 5            | 0             | 0            | 0           | 0          | 0            | 5             |          | WD                                                   |          |          |          |          |          | WD       | WD                |
| C*12:164                                                 | 12:164                 | HLA13874  |                                               | 0           | 2            | 0             | 0            | 0           | 0          | 0            | 2             |          |                                                      |          |          |          |          |          |          |                   |
| C*12:165                                                 | 12:165                 | HLA14028  |                                               | 0           | 1            | 1             | 0            | 0           | 0          | 0            | 2             |          |                                                      |          |          |          |          |          |          |                   |
| C*12:168                                                 | 12:168                 | HLA14255  |                                               | 1           | 0            | 0             | 0            | 0           | 0          | 0            | 1             |          |                                                      |          |          |          |          |          |          |                   |
| C*12:175                                                 | 12:175                 | HLA15051  |                                               | 0           | 1            | 0             | 0            | 0           | 0          | 0            | 1             |          |                                                      |          |          |          |          |          |          |                   |
| C*12:176                                                 | 12:176                 | HLA15052  |                                               | 0           | 1            | 0             | 0            | 0           | 0          | 0            | 1             |          |                                                      |          |          |          |          |          |          |                   |
| C*12:178                                                 | 12:178                 | HLA15140  |                                               | 0           | 0            | 1             | 0            | 0           | 0          | 0            | 1             |          |                                                      |          |          |          |          |          |          |                   |
| C*12:185                                                 | 12:185                 | HLA15191  |                                               | 0           | 0            | 1             | 0            | 0           | 0          | 0            | 1             |          |                                                      |          |          |          |          |          |          |                   |
| C*12:188                                                 | 12:188                 | HLA15427  |                                               | 0           | 0            | 1             | 0            | 0           | 0          | 0            | 1             |          |                                                      |          |          |          |          |          |          |                   |
| <b>C*12:195 total</b>                                    | <b>12:195 total</b>    |           |                                               | <b>0</b>    | <b>0</b>     | <b>0</b>      | <b>0</b>     | <b>1</b>    | <b>0</b>   | <b>0</b>     | <b>1</b>      |          |                                                      |          |          |          |          |          |          |                   |
| C*12:195:02                                              | 12:195:02              | HLA16939  |                                               | 0           | 0            | 0             | 0            | 1           | 0          | 0            | 1             |          |                                                      |          |          |          |          |          |          |                   |
| C*12:198                                                 | 12:198                 | HLA15920  |                                               | 0           | 1            | 0             | 0            | 0           | 0          | 0            | 1             |          |                                                      |          |          |          |          |          |          |                   |
| C*12:CODE                                                | 12:CODE                |           |                                               | 1076        | 4600         | 96871         | 3491         | 4699        | 497        | 14752        | 125986        | NA       | NA                                                   | NA       | NA       | NA       | NA       | NA       | NA       | NA                |
| <b>C*14:02 total</b>                                     | <b>14:02 total</b>     |           |                                               | <b>5688</b> | <b>45419</b> | <b>132525</b> | <b>12194</b> | <b>7737</b> | <b>963</b> | <b>16146</b> | <b>220672</b> | <b>C</b> | <b>C</b>                                             | <b>C</b> | <b>C</b> | <b>C</b> | <b>C</b> | <b>C</b> | <b>C</b> | <b>C</b>          |
| C*14:02                                                  | 14:02                  |           |                                               | 8           | 21           | 1366          | 16           | 11          | 0          | 71           | 1493          | WD       | I                                                    | C        | WD       | I        |          | I        | I        | C                 |
| C*14:02P                                                 | 14:02P                 |           |                                               | 0           | 3            | 280           | 1            | 2           | 0          | 0            | 286           |          |                                                      | I        |          |          |          |          | I        | I                 |
| <b>C*14:02:01G total</b>                                 | <b>14:02:01G total</b> |           |                                               | <b>5581</b> | <b>45392</b> | <b>130341</b> | <b>12150</b> | <b>7665</b> | <b>957</b> | <b>16014</b> | <b>218100</b> | <b>C</b> | <b>C</b>                                             | <b>C</b> | <b>C</b> | <b>C</b> | <b>C</b> | <b>C</b> | <b>C</b> | <b>C</b>          |
| C*14:02:01G                                              | 14:02:01G              |           | 14:02:01G                                     | 4167        | 39696        | 122356        | 11847        | 5213        | 660        | 13829        | 197768        | C        | C                                                    | C        | C        | C        | C        | C        | C        | C                 |
| C*14:02:01                                               | 14:02:01               |           | 14:02:01G                                     | 692         | 4394         | 5577          | 232          | 1644        | 165        | 1593         | 14297         | C        | C                                                    | C        | C        | C        | C        | C        | C        | C                 |
| C*14:02:01:01                                            | 14:02:01:01            | HLA00462  | 14:02:01G                                     | 86          | 1299         | 2235          | 64           | 503         | 59         | 394          | 4640          | C        | C                                                    | C        | C        | C        | C        | C        | C        | C                 |
| C*14:02:01:02                                            | 14:02:01:02            | HLA14811  | 14:02:01G                                     | 636         | 1            | 172           | 7            | 305         | 73         | 198          | 1392          | C        |                                                      | I        | WD       | C        | C        | C        | I        | C                 |
| C*14:02:07                                               | 14:02:07               | HLA06174  | 14:02:01G                                     | 0           | 1            | 0             | 0            | 0           | 0          | 0            | 1             |          |                                                      |          |          |          |          |          |          |                   |
| C*14:02:15                                               | 14:02:15               | HLA10145  | 14:02:01G                                     | 0           | 1            | 0             | 0            | 0           | 0          | 0            | 1             |          |                                                      |          |          |          |          |          |          |                   |
| C*14:31                                                  | 14:31                  | HLA06529  | 14:02:01G                                     | 0           | 0            | 1             | 0            | 0           | 0          | 0            | 1             |          |                                                      |          |          |          |          |          |          |                   |

| Supplemental Table 10: HLA-C Allele Summary <sup>a</sup> |                        |           | Allele Count by Population Group <sup>b</sup> |            |             |             |             |            |           |             |              | 3.0.0 CIWD Category by Population Group <sup>c</sup> |          |          |          |          |          |          |           |                   |    |
|----------------------------------------------------------|------------------------|-----------|-----------------------------------------------|------------|-------------|-------------|-------------|------------|-----------|-------------|--------------|------------------------------------------------------|----------|----------|----------|----------|----------|----------|-----------|-------------------|----|
| Allele                                                   | Genomic typing         | Allele ID | G group                                       | AFA        | API         | EURO        | MENA        | HIS        | NAM       | UNK         | Total        | AFA                                                  | API      | EURO     | MENA     | HIS      | NAM      | UNK      | Total     | Highest Frequency |    |
| C*14:02:02                                               | 14:02:02               | HLA00463  |                                               | 2          | 1           | 156         | 6           | 6          | 0         | 12          | 183          |                                                      |          | I        | WD       | WD       |          | WD       | I         | I                 |    |
| C*14:02:03                                               | 14:02:03               | HLA01721  |                                               | 97         | 1           | 17          | 21          | 50         | 6         | 40          | 232          | C                                                    |          | WD       | WD       | I        | WD       | I        | I         | C                 |    |
| C*14:02:04                                               | 14:02:04               | HLA02207  |                                               | 0          | 0           | 7           | 0           | 0          | 0         | 1           | 8            |                                                      |          | WD       |          |          |          |          | WD        | WD                |    |
| C*14:02:05                                               | 14:02:05               | HLA05194  |                                               | 0          | 0           | 12          | 0           | 0          | 0         | 1           | 13           |                                                      |          | WD       |          |          |          |          | WD        | WD                |    |
| C*14:02:06                                               | 14:02:06               | HLA05748  |                                               | 0          | 1           | 0           | 0           | 0          | 0         | 0           | 1            |                                                      |          |          |          |          |          |          |           |                   |    |
| C*14:02:08                                               | 14:02:08               | HLA07141  |                                               | 0          | 0           | 2           | 0           | 0          | 0         | 0           | 2            |                                                      |          |          |          |          |          |          |           |                   |    |
| C*14:02:09                                               | 14:02:09               | HLA07274  |                                               | 0          | 0           | 0           | 0           | 1          | 0         | 0           | 1            |                                                      |          |          |          |          |          |          |           |                   |    |
| C*14:02:17                                               | 14:02:17               | HLA11582  |                                               | 0          | 0           | 21          | 0           | 0          | 0         | 0           | 21           |                                                      |          | WD       |          |          |          |          | WD        | WD                |    |
| C*14:02:19                                               | 14:02:19               | HLA13528  |                                               | 0          | 0           | 2           | 0           | 0          | 0         | 0           | 2            |                                                      |          |          |          |          |          |          |           |                   |    |
| C*14:11                                                  | 14:11                  | HLA03455  |                                               | 0          | 0           | 321         | 0           | 2          | 0         | 7           | 330          |                                                      |          | I        |          |          |          | WD       | I         | I                 |    |
| <b>C*14:03 total</b>                                     | <b>14:03 total</b>     |           |                                               | <b>916</b> | <b>3628</b> | <b>2678</b> | <b>1158</b> | <b>396</b> | <b>34</b> | <b>1885</b> | <b>10695</b> | <b>C</b>                                             | <b>C</b> | <b>C</b> | <b>C</b> | <b>C</b> | <b>C</b> | <b>C</b> | <b>C</b>  | <b>C</b>          |    |
| <b>C*14:03:01G total</b>                                 | <b>14:03:01G total</b> |           |                                               | <b>916</b> | <b>3628</b> | <b>2678</b> | <b>1158</b> | <b>396</b> | <b>34</b> | <b>1885</b> | <b>10695</b> | <b>C</b>                                             | <b>C</b> | <b>C</b> | <b>C</b> | <b>C</b> | <b>C</b> | <b>C</b> | <b>C</b>  | <b>C</b>          |    |
| C*14:03                                                  | 14:03                  | HLA00464  | 14:03:01G                                     | 908        | 3530        | 2541        | 1106        | 393        | 34        | 1832        | 10344        | C                                                    | C        | C        | C        | C        | C        | C        | C         | C                 |    |
| C*14:03P                                                 | 14:03P                 |           | 14:03:01G                                     | 0          | 0           | 4           | 0           | 0          | 0         | 0           | 4            |                                                      |          |          |          |          |          |          |           |                   |    |
| C*14:03:01G                                              | 14:03:01G              |           | 14:03:01G                                     | 8          | 98          | 133         | 52          | 3          | 0         | 53          | 347          | WD                                                   | I        | I        | C        |          |          |          | I         | I                 | C  |
| C*14:04                                                  | 14:04                  | HLA00465  |                                               | 9          | 1           | 646         | 2           | 3          | 0         | 40          | 701          | WD                                                   |          | I        |          |          |          |          | I         | I                 | I  |
| C*14:05                                                  | 14:05                  | HLA01469  |                                               | 1          | 1           | 265         | 0           | 1          | 0         | 8           | 276          |                                                      |          | I        |          |          |          |          | WD        | I                 | I  |
| C*14:06                                                  | 14:06                  | HLA02087  |                                               | 5          | 1           | 6           | 0           | 37         | 0         | 8           | 57           | WD                                                   |          | WD       |          | I        |          |          | WD        | WD                | I  |
| C*14:07N                                                 | 14:07N                 | HLA02253  |                                               | 0          | 0           | 0           | 0           | 1          | 0         | 0           | 1            |                                                      |          |          |          |          |          |          |           |                   |    |
| C*14:10                                                  | 14:10                  | HLA03415  |                                               | 8          | 0           | 0           | 0           | 0          | 0         | 3           | 11           | WD                                                   |          |          |          |          |          |          |           | WD                | WD |
| C*14:12                                                  | 14:12                  | HLA03820  |                                               | 0          | 91          | 2           | 1           | 0          | 0         | 2           | 96           |                                                      | I        |          |          |          |          |          |           | WD                | I  |
| C*14:13                                                  | 14:13                  | HLA04327  |                                               | 0          | 0           | 1           | 0           | 0          | 0         | 0           | 1            |                                                      |          |          |          |          |          |          |           |                   |    |
| C*14:14                                                  | 14:14                  | HLA04341  |                                               | 0          | 0           | 1           | 0           | 0          | 0         | 0           | 1            |                                                      |          |          |          |          |          |          |           |                   |    |
| C*14:15                                                  | 14:15                  | HLA04619  |                                               | 0          | 0           | 1           | 0           | 0          | 0         | 0           | 1            |                                                      |          |          |          |          |          |          |           |                   |    |
| C*14:17                                                  | 14:17                  | HLA04778  |                                               | 0          | 0           | 3           | 0           | 0          | 0         | 0           | 3            |                                                      |          |          |          |          |          |          |           |                   |    |
| C*14:18                                                  | 14:18                  | HLA04784  |                                               | 0          | 4           | 13          | 0           | 0          | 0         | 0           | 17           |                                                      |          | WD       |          |          |          |          |           | WD                | WD |
| <b>C*14:24 total</b>                                     | <b>14:24 total</b>     |           |                                               | <b>0</b>   | <b>21</b>   | <b>0</b>    | <b>0</b>    | <b>0</b>   | <b>0</b>  | <b>0</b>    | <b>21</b>    |                                                      | <b>I</b> |          |          |          |          |          | <b>WD</b> | <b>I</b>          |    |
| C*14:24                                                  | 14:24                  |           |                                               | 0          | 1           | 0           | 0           | 0          | 0         | 0           | 1            |                                                      |          |          |          |          |          |          |           |                   |    |
| C*14:24:01                                               | 14:24:01               | HLA05891  |                                               | 0          | 2           | 0           | 0           | 0          | 0         | 0           | 2            |                                                      |          |          |          |          |          |          |           |                   |    |
| C*14:24:02                                               | 14:24:02               | HLA07858  |                                               | 0          | 18          | 0           | 0           | 0          | 0         | 0           | 18           |                                                      | I        |          |          |          |          |          |           | WD                | I  |
| C*14:25                                                  | 14:25                  | HLA05892  |                                               | 0          | 1           | 15          | 0           | 0          | 0         | 0           | 16           |                                                      |          | WD       |          |          |          |          |           | WD                | WD |

| Supplemental Table 10: HLA-C Allele Summary <sup>a</sup> |                    |           | Allele Count by Population Group <sup>b</sup> |             |               |               |              |              |             |              |               |          | 3.0.0 CIWD Category by Population Group <sup>c</sup> |          |          |          |          |          |          |                   |
|----------------------------------------------------------|--------------------|-----------|-----------------------------------------------|-------------|---------------|---------------|--------------|--------------|-------------|--------------|---------------|----------|------------------------------------------------------|----------|----------|----------|----------|----------|----------|-------------------|
| Allele                                                   | Genomic typing     | Allele ID | G group                                       | AFA         | API           | EURO          | MENA         | HIS          | NAM         | UNK          | Total         | AFA      | API                                                  | EURO     | MENA     | HIS      | NAM      | UNK      | Total    | Highest Frequency |
| C*14:26                                                  | 14:26              | HLA05921  |                                               | 0           | 1             | 0             | 0            | 0            | 0           | 0            | 1             |          |                                                      |          |          |          |          |          |          |                   |
| C*14:27                                                  | 14:27              | HLA06128  |                                               | 0           | 0             | 0             | 0            | 0            | 0           | 1            | 1             |          |                                                      |          |          |          |          |          |          |                   |
| <b>C*14:28 total</b>                                     | <b>14:28 total</b> |           |                                               | <b>0</b>    | <b>0</b>      | <b>0</b>      | <b>0</b>     | <b>1</b>     | <b>0</b>    | <b>0</b>     | <b>1</b>      |          |                                                      |          |          |          |          |          |          |                   |
| C*14:28:02                                               | 14:28:02           | HLA12024  |                                               | 0           | 0             | 0             | 0            | 1            | 0           | 0            | 1             |          |                                                      |          |          |          |          |          |          |                   |
| C*14:29                                                  | 14:29              | HLA06175  |                                               | 0           | 8             | 0             | 0            | 0            | 0           | 1            | 9             |          | WD                                                   |          |          |          |          |          | WD       | WD                |
| C*14:32                                                  | 14:32              | HLA07125  |                                               | 0           | 0             | 6             | 0            | 0            | 0           | 0            | 6             |          |                                                      | WD       |          |          |          |          | WD       | WD                |
| C*14:37                                                  | 14:37              | HLA07804  |                                               | 0           | 0             | 4             | 0            | 0            | 0           | 0            | 4             |          |                                                      |          |          |          |          |          |          |                   |
| C*14:39                                                  | 14:39              | HLA07825  |                                               | 0           | 2             | 0             | 0            | 0            | 0           | 0            | 2             |          |                                                      |          |          |          |          |          |          |                   |
| C*14:40                                                  | 14:40              | HLA07860  |                                               | 0           | 0             | 0             | 0            | 0            | 0           | 1            | 1             |          |                                                      |          |          |          |          |          |          |                   |
| C*14:41                                                  | 14:41              | HLA07861  |                                               | 0           | 0             | 5             | 0            | 0            | 0           | 0            | 5             |          |                                                      | WD       |          |          |          |          | WD       | WD                |
| C*14:43                                                  | 14:43              | HLA08220  |                                               | 0           | 0             | 1             | 0            | 0            | 0           | 0            | 1             |          |                                                      |          |          |          |          |          |          |                   |
| C*14:44                                                  | 14:44              | HLA08304  |                                               | 0           | 0             | 0             | 0            | 1            | 0           | 1            | 2             |          |                                                      |          |          |          |          |          |          |                   |
| <b>C*14:46 total</b>                                     | <b>14:46 total</b> |           |                                               | <b>0</b>    | <b>1</b>      | <b>1</b>      | <b>0</b>     | <b>0</b>     | <b>0</b>    | <b>0</b>     | <b>2</b>      |          |                                                      |          |          |          |          |          |          |                   |
| C*14:46                                                  | 14:46              |           |                                               | 0           | 1             | 1             | 0            | 0            | 0           | 0            | 2             |          |                                                      |          |          |          |          |          |          |                   |
| C*14:47N                                                 | 14:47N             | HLA08819  |                                               | 0           | 0             | 1             | 0            | 0            | 0           | 0            | 1             |          |                                                      |          |          |          |          |          |          |                   |
| C*14:49                                                  | 14:49              | HLA08821  |                                               | 0           | 1             | 0             | 0            | 0            | 0           | 0            | 1             |          |                                                      |          |          |          |          |          |          |                   |
| C*14:50                                                  | 14:50              | HLA09203  |                                               | 0           | 0             | 5             | 0            | 0            | 0           | 0            | 5             |          |                                                      | WD       |          |          |          |          | WD       | WD                |
| C*14:51                                                  | 14:51              | HLA09204  |                                               | 0           | 1             | 0             | 0            | 0            | 0           | 0            | 1             |          |                                                      |          |          |          |          |          |          |                   |
| C*14:55                                                  | 14:55              | HLA10108  |                                               | 0           | 0             | 1             | 0            | 0            | 0           | 0            | 1             |          |                                                      |          |          |          |          |          |          |                   |
| C*14:63                                                  | 14:63              | HLA11267  |                                               | 0           | 3             | 0             | 0            | 0            | 0           | 0            | 3             |          |                                                      |          |          |          |          |          |          |                   |
| C*14:64                                                  | 14:64              | HLA11268  |                                               | 0           | 0             | 4             | 0            | 0            | 0           | 0            | 4             |          |                                                      |          |          |          |          |          |          |                   |
| C*14:66                                                  | 14:66              | HLA11581  |                                               | 0           | 0             | 2             | 0            | 17           | 0           | 1            | 20            |          |                                                      |          |          | I        |          |          | WD       | I                 |
| C*14:67                                                  | 14:67              | HLA11669  |                                               | 1           | 4             | 0             | 0            | 0            | 0           | 0            | 5             |          |                                                      |          |          |          |          |          | WD       | WD                |
| C*14:69                                                  | 14:69              | HLA12729  |                                               | 0           | 0             | 2             | 0            | 0            | 0           | 0            | 2             |          |                                                      |          |          |          |          |          |          |                   |
| C*14:74                                                  | 14:74              | HLA15184  |                                               | 0           | 0             | 1             | 0            | 0            | 0           | 0            | 1             |          |                                                      |          |          |          |          |          |          |                   |
| C*14:76                                                  | 14:76              | HLA15892  |                                               | 0           | 0             | 0             | 1            | 0            | 0           | 0            | 1             |          |                                                      |          |          |          |          |          |          |                   |
| C*14:81                                                  | 14:81              | HLA15988  |                                               | 0           | 1             | 0             | 0            | 0            | 0           | 0            | 1             |          |                                                      |          |          |          |          |          |          |                   |
| C*14:CODE                                                | 14:CODE            |           |                                               | 849         | 2156          | 13517         | 642          | 1186         | 169         | 2382         | 20901         | NA       | NA                                                   | NA       | NA       | NA       | NA       | NA       | NA       | NA                |
| <b>C*15:02 total</b>                                     | <b>15:02 total</b> |           |                                               | <b>2271</b> | <b>102664</b> | <b>232095</b> | <b>21990</b> | <b>18659</b> | <b>1954</b> | <b>30364</b> | <b>409997</b> | <b>C</b> | <b>C</b>                                             | <b>C</b> | <b>C</b> | <b>C</b> | <b>C</b> | <b>C</b> | <b>C</b> | <b>C</b>          |
| C*15:02                                                  | 15:02              |           |                                               | 1           | 8             | 1748          | 12           | 13           | 0           | 80           | 1862          |          | WD                                                   | C        | WD       | I        |          | I        | C        | C                 |
| C*15:02P                                                 | 15:02P             |           |                                               | 0           | 8             | 463           | 3            | 2            | 0           | 3            | 479           |          | WD                                                   | I        |          |          |          |          | I        | I                 |

| Supplemental Table 10: HLA-C Allele Summary <sup>a</sup> |                        |           | Allele Count by Population Group <sup>b</sup> |             |               |               |              |              |             |              |               | 3.0.0 CIWD Category by Population Group <sup>c</sup> |          |          |          |          |          |          |          |                   |
|----------------------------------------------------------|------------------------|-----------|-----------------------------------------------|-------------|---------------|---------------|--------------|--------------|-------------|--------------|---------------|------------------------------------------------------|----------|----------|----------|----------|----------|----------|----------|-------------------|
| Allele                                                   | Genomic typing         | Allele ID | G group                                       | AFA         | API           | EURO          | MENA         | HIS          | NAM         | UNK          | Total         | AFA                                                  | API      | EURO     | MENA     | HIS      | NAM      | UNK      | Total    | Highest Frequency |
| <b>C*15:02:01G total</b>                                 | <b>15:02:01G total</b> |           |                                               | <b>2269</b> | <b>102628</b> | <b>229687</b> | <b>21959</b> | <b>18631</b> | <b>1951</b> | <b>30249</b> | <b>407374</b> | <b>C</b>                                             | <b>C</b> | <b>C</b> | <b>C</b> | <b>C</b> | <b>C</b> | <b>C</b> | <b>C</b> | <b>C</b>          |
| C*15:02:01G                                              | 15:02:01G              |           | 15:02:01G                                     | 1797        | 97152         | 218954        | 21530        | 14131        | 1435        | 28131        | 383130        | C                                                    | C        | C        | C        | C        | C        | C        | C        | C                 |
| C*15:02:01                                               | 15:02:01               |           | 15:02:01G                                     | 112         | 1354          | 2758          | 113          | 1017         | 119         | 490          | 5963          | C                                                    | C        | C        | C        | C        | C        | C        | C        | C                 |
| C*15:02:01:01                                            | 15:02:01:01            | HLA00467  | 15:02:01G                                     | 334         | 4062          | 7254          | 274          | 3249         | 370         | 1515         | 17058         | C                                                    | C        | C        | C        | C        | C        | C        | C        | C                 |
| C*15:02:01:02                                            | 15:02:01:02            | HLA12697  | 15:02:01G                                     | 10          | 2             | 384           | 0            | 83           | 6           | 55           | 540           | WD                                                   |          | I        |          | C        | WD       | I        | I        | C                 |
| C*15:02:01:03                                            | 15:02:01:03            | HLA12909  | 15:02:01G                                     | 0           | 21            | 6             | 0            | 0            | 5           | 5            | 37            |                                                      | I        | WD       |          |          | WD       | WD       | WD       | I                 |
| C*15:02:01:04                                            | 15:02:01:04            | HLA16028  | 15:02:01G                                     | 0           | 0             | 1             | 0            | 0            | 0           | 0            | 1             |                                                      |          |          |          |          |          |          |          |                   |
| C*15:02:01:06                                            | 15:02:01:06            | HLA16725  | 15:02:01G                                     | 0           | 7             | 1             | 0            | 0            | 0           | 2            | 10            |                                                      | WD       |          |          |          |          |          | WD       | WD                |
| C*15:02:01:07                                            | 15:02:01:07            | HLA16726  | 15:02:01G                                     | 0           | 0             | 2             | 0            | 1            | 0           | 0            | 3             |                                                      |          |          |          |          |          |          |          |                   |
| C*15:02:07                                               | 15:02:07               | HLA05893  | 15:02:01G                                     | 0           | 6             | 0             | 0            | 0            | 0           | 0            | 6             |                                                      | WD       |          |          |          |          |          | WD       | WD                |
| C*15:02:19                                               | 15:02:19               | HLA10156  | 15:02:01G                                     | 0           | 1             | 0             | 0            | 0            | 0           | 0            | 1             |                                                      |          |          |          |          |          |          |          |                   |
| <b>C*15:13 total</b>                                     | <b>15:13 total</b>     |           |                                               | <b>16</b>   | <b>23</b>     | <b>323</b>    | <b>42</b>    | <b>150</b>   | <b>16</b>   | <b>50</b>    | <b>620</b>    | <b>WD</b>                                            | <b>I</b> | <b>I</b> | <b>C</b> | <b>C</b> | <b>C</b> | <b>I</b> | <b>I</b> | <b>C</b>          |
| C*15:13                                                  | 15:13                  |           | 15:02:01G                                     | 16          | 21            | 310           | 39           | 146          | 16          | 50           | 598           | WD                                                   | I        | I        | WD       | C        | C        | I        | I        | C                 |
| C*15:13:01:01                                            | 15:13:01:01            | HLA02022  | 15:02:01G                                     | 0           | 2             | 11            | 3            | 4            | 0           | 0            | 20            |                                                      |          | WD       |          |          |          |          | WD       | WD                |
| C*15:13:01:02                                            | 15:13:01:02            | HLA16841  | 15:02:01G                                     | 0           | 0             | 2             | 0            | 0            | 0           | 0            | 2             |                                                      |          |          |          |          |          |          |          |                   |
| C*15:87                                                  | 15:87                  | HLA11486  | 15:02:01G                                     | 0           | 0             | 3             | 0            | 0            | 0           | 1            | 4             |                                                      |          |          |          |          |          |          |          |                   |
| C*15:97                                                  | 15:97                  | HLA12183  | 15:02:01G                                     | 0           | 0             | 1             | 0            | 0            | 0           | 0            | 1             |                                                      |          |          |          |          |          |          |          |                   |
| C*15:02:02                                               | 15:02:02               | HLA01081  |                                               | 1           | 1             | 136           | 12           | 8            | 3           | 27           | 188           |                                                      |          | I        | WD       | I        |          | I        | I        | I                 |
| C*15:02:03                                               | 15:02:03               | HLA02424  |                                               | 0           | 0             | 45            | 2            | 3            | 0           | 4            | 54            |                                                      |          | WD       |          |          |          |          | WD       | WD                |
| C*15:02:04                                               | 15:02:04               | HLA03146  |                                               | 0           | 2             | 0             | 0            | 0            | 0           | 0            | 2             |                                                      |          |          |          |          |          |          |          |                   |
| C*15:02:05                                               | 15:02:05               | HLA04624  |                                               | 0           | 0             | 8             | 1            | 0            | 0           | 0            | 9             |                                                      |          | WD       |          |          |          |          | WD       | WD                |
| C*15:02:08                                               | 15:02:08               | HLA07760  |                                               | 0           | 0             | 1             | 0            | 0            | 0           | 0            | 1             |                                                      |          |          |          |          |          |          |          |                   |
| C*15:02:10                                               | 15:02:10               | HLA07791  |                                               | 0           | 9             | 0             | 1            | 0            | 0           | 0            | 10            |                                                      | WD       |          |          |          |          |          | WD       | WD                |
| C*15:02:11                                               | 15:02:11               | HLA08757  |                                               | 0           | 0             | 0             | 0            | 1            | 0           | 1            | 2             |                                                      |          |          |          |          |          |          |          |                   |
| C*15:02:13                                               | 15:02:13               | HLA08759  |                                               | 0           | 0             | 3             | 0            | 0            | 0           | 0            | 3             |                                                      |          |          |          |          |          |          |          |                   |
| C*15:02:14                                               | 15:02:14               | HLA08760  |                                               | 0           | 0             | 1             | 0            | 1            | 0           | 0            | 2             |                                                      |          |          |          |          |          |          |          |                   |
| C*15:02:20                                               | 15:02:20               | HLA12197  |                                               | 0           | 0             | 2             | 0            | 0            | 0           | 0            | 2             |                                                      |          |          |          |          |          |          |          |                   |
| C*15:02:22                                               | 15:02:22               | HLA13254  |                                               | 0           | 1             | 0             | 0            | 0            | 0           | 0            | 1             |                                                      |          |          |          |          |          |          |          |                   |
| C*15:02:23                                               | 15:02:23               | HLA13255  |                                               | 0           | 6             | 0             | 0            | 0            | 0           | 0            | 6             |                                                      | WD       |          |          |          |          |          | WD       | WD                |
| C*15:02:24                                               | 15:02:24               | HLA13257  |                                               | 0           | 1             | 0             | 0            | 0            | 0           | 0            | 1             |                                                      |          |          |          |          |          |          |          |                   |
| C*15:02:25                                               | 15:02:25               | HLA14598  |                                               | 0           | 0             | 1             | 0            | 0            | 0           | 0            | 1             |                                                      |          |          |          |          |          |          |          |                   |



| Supplemental Table 10: HLA-C Allele Summary <sup>a</sup> |                        |           | Allele Count by Population Group <sup>b</sup> |             |              |              |             |             |            |              |              | 3.0.0 CIWD Category by Population Group <sup>c</sup> |          |           |          |          |          |          |           |                   |
|----------------------------------------------------------|------------------------|-----------|-----------------------------------------------|-------------|--------------|--------------|-------------|-------------|------------|--------------|--------------|------------------------------------------------------|----------|-----------|----------|----------|----------|----------|-----------|-------------------|
| Allele                                                   | Genomic typing         | Allele ID | G group                                       | AFA         | API          | EURO         | MENA        | HIS         | NAM        | UNK          | Total        | AFA                                                  | API      | EURO      | MENA     | HIS      | NAM      | UNK      | Total     | Highest Frequency |
| C*15:03                                                  | 15:03                  | HLA00468  |                                               | 2           | 0            | 10           | 1           | 19          | 0          | 20           | 52           |                                                      |          | WD        |          | I        |          | I        | WD        | I                 |
| <b>C*15:04 total</b>                                     | <b>15:04 total</b>     |           |                                               | <b>34</b>   | <b>1270</b>  | <b>5664</b>  | <b>2865</b> | <b>332</b>  | <b>19</b>  | <b>1011</b>  | <b>11195</b> | <b>WD</b>                                            | <b>C</b> | <b>C</b>  | <b>C</b> | <b>C</b> | <b>C</b> | <b>C</b> | <b>C</b>  | <b>C</b>          |
| C*15:04                                                  | 15:04                  |           |                                               | 15          | 233          | 2728         | 1137        | 150         | 8          | 506          | 4777         | WD                                                   | C        | C         | C        | C        | C        | C        | C         | C                 |
| C*15:04P                                                 | 15:04P                 |           |                                               | 0           | 0            | 4            | 0           | 0           | 0          | 0            | 4            |                                                      |          |           |          |          |          |          |           |                   |
| <b>C*15:04:01G total</b>                                 | <b>15:04:01G total</b> |           |                                               | <b>19</b>   | <b>1037</b>  | <b>2932</b>  | <b>1728</b> | <b>182</b>  | <b>11</b>  | <b>505</b>   | <b>6414</b>  | <b>WD</b>                                            | <b>C</b> | <b>C</b>  | <b>C</b> | <b>C</b> | <b>C</b> | <b>C</b> | <b>C</b>  | <b>C</b>          |
| C*15:04:01G                                              | 15:04:01G              |           | 15:04:01G                                     | 6           | 435          | 645          | 171         | 24          | 0          | 60           | 1341         | WD                                                   | C        | I         | C        | I        |          | I        | I         | C                 |
| C*15:04:01                                               | 15:04:01               | HLA00469  | 15:04:01G                                     | 13          | 602          | 2287         | 1557        | 158         | 11         | 445          | 5073         | WD                                                   | C        | C         | C        | C        | C        | C        | C         | C                 |
| <b>C*15:05 total</b>                                     | <b>15:05 total</b>     |           |                                               | <b>5943</b> | <b>15274</b> | <b>42327</b> | <b>6796</b> | <b>4355</b> | <b>429</b> | <b>10378</b> | <b>85502</b> | <b>C</b>                                             | <b>C</b> | <b>C</b>  | <b>C</b> | <b>C</b> | <b>C</b> | <b>C</b> | <b>C</b>  | <b>C</b>          |
| C*15:05                                                  | 15:05                  |           |                                               | 28          | 25           | 1024         | 68          | 7           | 3          | 173          | 1328         | WD                                                   | I        | I         | C        | I        |          | C        | I         | C                 |
| C*15:05P                                                 | 15:05P                 |           |                                               | 2           | 2            | 128          | 0           | 1           | 0          | 0            | 133          |                                                      |          | I         |          |          |          |          | WD        | I                 |
| <b>C*15:05:01G total</b>                                 | <b>15:05:01G total</b> |           |                                               | <b>5893</b> | <b>15247</b> | <b>41143</b> | <b>6728</b> | <b>4346</b> | <b>426</b> | <b>10196</b> | <b>83979</b> | <b>C</b>                                             | <b>C</b> | <b>C</b>  | <b>C</b> | <b>C</b> | <b>C</b> | <b>C</b> | <b>C</b>  | <b>C</b>          |
| C*15:05:01G                                              | 15:05:01G              |           | 15:05:01G                                     | 4836        | 14057        | 39317        | 6536        | 3305        | 307        | 9667         | 78025        | C                                                    | C        | C         | C        | C        | C        | C        | C         | C                 |
| C*15:05:01                                               | 15:05:01               | HLA00470  | 15:05:01G                                     | 42          | 18           | 222          | 41          | 119         | 13         | 37           | 492          | C                                                    | I        | I         | C        | C        | C        | I        | I         | C                 |
| C*15:05:02                                               | 15:05:02               | HLA00471  | 15:05:01G                                     | 945         | 1169         | 1604         | 148         | 918         | 104        | 476          | 5364         | C                                                    | C        | C         | C        | C        | C        | C        | C         | C                 |
| C*15:05:03                                               | 15:05:03               | HLA01803  | 15:05:01G                                     | 70          | 0            | 0            | 3           | 4           | 2          | 16           | 95           | C                                                    |          |           |          |          |          | I        | WD        | C                 |
| C*15:29                                                  | 15:29                  | HLA05113  | 15:05:01G                                     | 0           | 3            | 0            | 0           | 0           | 0          | 0            | 3            |                                                      |          |           |          |          |          |          |           |                   |
| C*15:05:04                                               | 15:05:04               | HLA01909  |                                               | 3           | 0            | 0            | 0           | 0           | 0          | 0            | 3            |                                                      |          |           |          |          |          |          |           |                   |
| C*15:05:06                                               | 15:05:06               | HLA06416  |                                               | 12          | 0            | 0            | 0           | 1           | 0          | 7            | 20           | WD                                                   |          |           |          |          |          |          | WD        | WD                |
| C*15:05:07                                               | 15:05:07               | HLA08476  |                                               | 0           | 0            | 32           | 0           | 0           | 0          | 0            | 32           |                                                      |          | WD        |          |          |          |          |           | WD                |
| C*15:05:08                                               | 15:05:08               | HLA09036  |                                               | 3           | 0            | 0            | 0           | 0           | 0          | 2            | 5            |                                                      |          |           |          |          |          |          |           | WD                |
| C*15:05:09                                               | 15:05:09               | HLA09627  |                                               | 2           | 0            | 0            | 0           | 0           | 0          | 0            | 2            |                                                      |          |           |          |          |          |          |           |                   |
| <b>C*15:06 total</b>                                     | <b>15:06 total</b>     |           |                                               | <b>7</b>    | <b>28</b>    | <b>3256</b>  | <b>1023</b> | <b>129</b>  | <b>13</b>  | <b>374</b>   | <b>4830</b>  | <b>WD</b>                                            | <b>I</b> | <b>C</b>  | <b>C</b> | <b>C</b> | <b>C</b> | <b>C</b> | <b>C</b>  | <b>C</b>          |
| C*15:06                                                  | 15:06                  |           |                                               | 1           | 1            | 243          | 107         | 15          | 1          | 25           | 393          |                                                      |          | I         | C        | I        |          | I        | I         | C                 |
| C*15:06P                                                 | 15:06P                 |           |                                               | 0           | 0            | 5            | 0           | 0           | 0          | 0            | 5            |                                                      |          | WD        |          |          |          |          | WD        | WD                |
| C*15:06:01                                               | 15:06:01               | HLA00472  |                                               | 6           | 27           | 2983         | 916         | 114         | 12         | 349          | 4407         | WD                                                   | I        | C         | C        | C        | C        | C        | C         | C                 |
| C*15:06:02                                               | 15:06:02               | HLA04779  |                                               | 0           | 0            | 19           | 0           | 0           | 0          | 0            | 19           |                                                      |          | WD        |          |          |          |          |           | WD                |
| C*15:06:03                                               | 15:06:03               | HLA05865  |                                               | 0           | 0            | 6            | 0           | 0           | 0          | 0            | 6            |                                                      |          | WD        |          |          |          |          |           | WD                |
| C*15:07                                                  | 15:07                  | HLA00473  |                                               | 2           | 2003         | 20           | 8           | 4           | 1          | 17           | 2055         |                                                      | C        | WD        | WD       |          |          |          | I         | C                 |
| C*15:08                                                  | 15:08                  | HLA00474  |                                               | 0           | 33           | 10           | 1           | 30          | 2          | 16           | 92           |                                                      | I        | WD        |          | I        |          | I        | WD        | I                 |
| C*15:09                                                  | 15:09                  | HLA01124  |                                               | 36          | 46           | 678          | 174         | 2658        | 156        | 488          | 4236         | WD                                                   | I        | I         | C        | C        | C        | C        | C         | C                 |
| <b>C*15:10 total</b>                                     | <b>15:10 total</b>     |           |                                               | <b>0</b>    | <b>79</b>    | <b>7</b>     | <b>0</b>    | <b>1</b>    | <b>0</b>   | <b>2</b>     | <b>89</b>    |                                                      | <b>I</b> | <b>WD</b> |          |          |          |          | <b>WD</b> | <b>I</b>          |

| Supplemental Table 10: HLA-C Allele Summary <sup>a</sup> |                    |           | Allele Count by Population Group <sup>b</sup> |          |          |          |          |          |          |          |          | 3.0.0 CIWD Category by Population Group <sup>c</sup> |     |           |      |     |     |     |           |                   |
|----------------------------------------------------------|--------------------|-----------|-----------------------------------------------|----------|----------|----------|----------|----------|----------|----------|----------|------------------------------------------------------|-----|-----------|------|-----|-----|-----|-----------|-------------------|
| Allele                                                   | Genomic typing     | Allele ID | G group                                       | AFA      | API      | EURO     | MENA     | HIS      | NAM      | UNK      | Total    | AFA                                                  | API | EURO      | MENA | HIS | NAM | UNK | Total     | Highest Frequency |
| C*15:10:02                                               | 15:10:02           | HLA03108  |                                               | 0        | 78       | 7        | 0        | 1        | 0        | 2        | 88       |                                                      | I   | WD        |      |     |     |     | WD        | I                 |
| C*15:10:03                                               | 15:10:03           | HLA10105  |                                               | 0        | 1        | 0        | 0        | 0        | 0        | 0        | 1        |                                                      |     |           |      |     |     |     |           |                   |
| C*15:11                                                  | 15:11              | HLA01424  |                                               | 7        | 36       | 925      | 22       | 14       | 2        | 85       | 1091     | WD                                                   | I   | I         | WD   | I   |     | I   | I         | I                 |
| C*15:12                                                  | 15:12              | HLA01884  |                                               | 0        | 3        | 1        | 0        | 0        | 0        | 0        | 4        |                                                      |     |           |      |     |     |     |           |                   |
| C*15:15                                                  | 15:15              | HLA02396  |                                               | 3        | 2        | 5        | 1        | 0        | 0        | 3        | 14       |                                                      |     | WD        |      |     |     |     | WD        | WD                |
| C*15:16                                                  | 15:16              | HLA02404  |                                               | 0        | 0        | 52       | 2        | 18       | 0        | 40       | 112      |                                                      |     | WD        |      | I   |     | I   | WD        | I                 |
| C*15:17                                                  | 15:17              | HLA02438  |                                               | 0        | 1        | 5        | 0        | 10       | 1        | 2        | 19       |                                                      |     | WD        |      | I   |     |     | WD        | I                 |
| C*15:22                                                  | 15:22              | HLA03813  |                                               | 44       | 0        | 1        | 0        | 0        | 1        | 7        | 53       | C                                                    |     |           |      |     |     | WD  | WD        | C                 |
| C*15:23                                                  | 15:23              | HLA04312  |                                               | 0        | 0        | 25       | 1        | 0        | 0        | 1        | 27       |                                                      |     | WD        |      |     |     |     | WD        | WD                |
| C*15:24                                                  | 15:24              | HLA04598  |                                               | 0        | 1        | 67       | 0        | 1        | 0        | 2        | 71       |                                                      |     | WD        |      |     |     |     | WD        | WD                |
| C*15:25                                                  | 15:25              | HLA04579  |                                               | 5        | 0        | 1        | 7        | 1        | 0        | 3        | 17       | WD                                                   |     |           | WD   |     |     |     | WD        | WD                |
| C*15:26                                                  | 15:26              | HLA04639  |                                               | 0        | 6        | 0        | 0        | 0        | 0        | 0        | 6        |                                                      | WD  |           |      |     |     |     | WD        | WD                |
| C*15:27                                                  | 15:27              | HLA04693  |                                               | 0        | 0        | 2        | 0        | 11       | 0        | 1        | 14       |                                                      |     |           |      | I   |     |     | WD        | I                 |
| C*15:28                                                  | 15:28              | HLA04831  |                                               | 0        | 0        | 2        | 0        | 0        | 0        | 0        | 2        |                                                      |     |           |      |     |     |     |           |                   |
| C*15:30                                                  | 15:30              | HLA05115  |                                               | 0        | 0        | 32       | 8        | 0        | 0        | 1        | 41       |                                                      |     | WD        | WD   |     |     |     | WD        | WD                |
| C*15:32Q                                                 | 15:32Q             | HLA05160  |                                               | 0        | 14       | 0        | 0        | 0        | 0        | 0        | 14       |                                                      | I   |           |      |     |     |     | WD        | I                 |
| C*15:33                                                  | 15:33              | HLA05181  |                                               | 0        | 3        | 0        | 0        | 0        | 0        | 0        | 3        |                                                      |     |           |      |     |     |     |           |                   |
| C*15:34                                                  | 15:34              | HLA05198  |                                               | 1        | 0        | 3        | 0        | 0        | 0        | 0        | 4        |                                                      |     |           |      |     |     |     |           |                   |
| C*15:35                                                  | 15:35              | HLA05216  |                                               | 0        | 0        | 1        | 0        | 0        | 0        | 0        | 1        |                                                      |     |           |      |     |     |     |           |                   |
| C*15:36                                                  | 15:36              | HLA05558  |                                               | 0        | 0        | 3        | 1        | 0        | 0        | 0        | 4        |                                                      |     |           |      |     |     |     |           |                   |
| C*15:37                                                  | 15:37              | HLA05581  |                                               | 0        | 0        | 3        | 0        | 0        | 0        | 0        | 3        |                                                      |     |           |      |     |     |     |           |                   |
| C*15:38                                                  | 15:38              | HLA05600  |                                               | 0        | 0        | 6        | 0        | 0        | 0        | 1        | 7        |                                                      |     | WD        |      |     |     |     | WD        | WD                |
| C*15:39                                                  | 15:39              | HLA05614  |                                               | 0        | 0        | 3        | 0        | 0        | 0        | 0        | 3        |                                                      |     |           |      |     |     |     |           |                   |
| C*15:40                                                  | 15:40              | HLA05615  |                                               | 0        | 5        | 1        | 1        | 0        | 0        | 1        | 8        |                                                      | WD  |           |      |     |     |     | WD        | WD                |
| C*15:41                                                  | 15:41              | HLA05625  |                                               | 0        | 0        | 1        | 0        | 0        | 0        | 0        | 1        |                                                      |     |           |      |     |     |     |           |                   |
| C*15:42                                                  | 15:42              | HLA05750  |                                               | 0        | 24       | 0        | 0        | 0        | 1        | 2        | 27       |                                                      | I   |           |      |     |     |     | WD        | I                 |
| C*15:43                                                  | 15:43              | HLA05755  |                                               | 0        | 0        | 2        | 0        | 0        | 0        | 0        | 2        |                                                      |     |           |      |     |     |     |           |                   |
| <b>C*15:44 total</b>                                     | <b>15:44 total</b> |           |                                               | <b>0</b> | <b>0</b> | <b>9</b> | <b>0</b> | <b>0</b> | <b>0</b> | <b>0</b> | <b>9</b> |                                                      |     | <b>WD</b> |      |     |     |     | <b>WD</b> | <b>WD</b>         |
| C*15:44                                                  | 15:44              |           |                                               | 0        | 0        | 6        | 0        | 0        | 0        | 0        | 6        |                                                      |     | WD        |      |     |     |     | WD        | WD                |
| C*15:44:01                                               | 15:44:01           | HLA05854  |                                               | 0        | 0        | 3        | 0        | 0        | 0        | 0        | 3        |                                                      |     |           |      |     |     |     |           |                   |
| C*15:45                                                  | 15:45              | HLA05879  |                                               | 0        | 0        | 1        | 0        | 0        | 0        | 0        | 1        |                                                      |     |           |      |     |     |     |           |                   |

| Supplemental Table 10: HLA-C Allele Summary <sup>a</sup> |                    |           | Allele Count by Population Group <sup>b</sup> |          |          |          |          |          |          |          |          |     | 3.0.0 CIWD Category by Population Group <sup>c</sup> |      |      |     |     |     |       |                   |
|----------------------------------------------------------|--------------------|-----------|-----------------------------------------------|----------|----------|----------|----------|----------|----------|----------|----------|-----|------------------------------------------------------|------|------|-----|-----|-----|-------|-------------------|
| Allele                                                   | Genomic typing     | Allele ID | G group                                       | AFA      | API      | EURO     | MENA     | HIS      | NAM      | UNK      | Total    | AFA | API                                                  | EURO | MENA | HIS | NAM | UNK | Total | Highest Frequency |
| C*15:46                                                  | 15:46              | HLA06002  |                                               | 0        | 0        | 1        | 0        | 0        | 0        | 0        | 1        |     |                                                      |      |      |     |     |     |       |                   |
| C*15:48                                                  | 15:48              | HLA06123  |                                               | 0        | 0        | 2        | 0        | 0        | 0        | 0        | 2        |     |                                                      |      |      |     |     |     |       |                   |
| C*15:51                                                  | 15:51              | HLA06725  |                                               | 0        | 0        | 0        | 0        | 1        | 0        | 0        | 1        |     |                                                      |      |      |     |     |     |       |                   |
| C*15:52                                                  | 15:52              | HLA07049  |                                               | 0        | 0        | 3        | 0        | 1        | 0        | 8        | 12       |     |                                                      |      |      |     |     | WD  | WD    | WD                |
| C*15:54                                                  | 15:54              | HLA07067  |                                               | 0        | 0        | 2        | 0        | 0        | 0        | 0        | 2        |     |                                                      |      |      |     |     |     |       |                   |
| C*15:56                                                  | 15:56              | HLA07139  |                                               | 0        | 0        | 3        | 0        | 0        | 0        | 0        | 3        |     |                                                      |      |      |     |     |     |       |                   |
| C*15:57                                                  | 15:57              | HLA07494  |                                               | 0        | 6        | 0        | 0        | 0        | 0        | 0        | 6        |     | WD                                                   |      |      |     |     |     | WD    | WD                |
| C*15:58                                                  | 15:58              | HLA07787  |                                               | 0        | 36       | 1        | 0        | 0        | 0        | 0        | 37       |     | I                                                    |      |      |     |     |     | WD    | I                 |
| C*15:59                                                  | 15:59              | HLA07788  |                                               | 0        | 0        | 1        | 0        | 0        | 0        | 0        | 1        |     |                                                      |      |      |     |     |     |       |                   |
| C*15:60                                                  | 15:60              | HLA07790  |                                               | 0        | 0        | 0        | 0        | 2        | 1        | 0        | 3        |     |                                                      |      |      |     |     |     |       |                   |
| C*15:61                                                  | 15:61              | HLA08170  |                                               | 0        | 0        | 0        | 0        | 1        | 0        | 0        | 1        |     |                                                      |      |      |     |     |     |       |                   |
| C*15:62                                                  | 15:62              | HLA08534  |                                               | 0        | 2        | 0        | 0        | 0        | 0        | 0        | 2        |     |                                                      |      |      |     |     |     |       |                   |
| C*15:63                                                  | 15:63              | HLA08694  |                                               | 0        | 0        | 1        | 0        | 0        | 0        | 0        | 1        |     |                                                      |      |      |     |     |     |       |                   |
| C*15:66                                                  | 15:66              | HLA09037  |                                               | 0        | 0        | 2        | 0        | 0        | 0        | 0        | 2        |     |                                                      |      |      |     |     |     |       |                   |
| C*15:68                                                  | 15:68              | HLA09619  |                                               | 0        | 12       | 0        | 0        | 0        | 0        | 0        | 12       |     | WD                                                   |      |      |     |     |     | WD    | WD                |
| C*15:69                                                  | 15:69              | HLA09621  |                                               | 0        | 0        | 4        | 0        | 0        | 0        | 0        | 4        |     |                                                      |      |      |     |     |     |       |                   |
| C*15:72                                                  | 15:72              | HLA10095  |                                               | 0        | 2        | 3        | 0        | 0        | 0        | 0        | 5        |     |                                                      |      |      |     |     |     | WD    | WD                |
| C*15:73                                                  | 15:73              | HLA10096  |                                               | 0        | 3        | 0        | 0        | 0        | 0        | 0        | 3        |     |                                                      |      |      |     |     |     |       |                   |
| C*15:74                                                  | 15:74              | HLA10097  |                                               | 0        | 0        | 0        | 1        | 0        | 0        | 0        | 1        |     |                                                      |      |      |     |     |     |       |                   |
| C*15:76                                                  | 15:76              | HLA10099  |                                               | 0        | 0        | 0        | 0        | 1        | 0        | 0        | 1        |     |                                                      |      |      |     |     |     |       |                   |
| C*15:77                                                  | 15:77              | HLA10100  |                                               | 0        | 0        | 0        | 0        | 0        | 0        | 1        | 1        |     |                                                      |      |      |     |     |     |       |                   |
| <b>C*15:78 total</b>                                     | <b>15:78 total</b> |           |                                               | <b>0</b> | <b>1</b> | <b>0</b> | <b>0</b> | <b>0</b> | <b>0</b> | <b>0</b> | <b>1</b> |     |                                                      |      |      |     |     |     |       |                   |
| C*15:78                                                  | 15:78              |           |                                               | 0        | 1        | 0        | 0        | 0        | 0        | 0        | 1        |     |                                                      |      |      |     |     |     |       |                   |
| C*15:79                                                  | 15:79              | HLA10152  |                                               | 0        | 1        | 0        | 0        | 0        | 0        | 0        | 1        |     |                                                      |      |      |     |     |     |       |                   |
| C*15:80                                                  | 15:80              | HLA10154  |                                               | 0        | 0        | 1        | 0        | 0        | 0        | 0        | 1        |     |                                                      |      |      |     |     |     |       |                   |
| C*15:85                                                  | 15:85              | HLA10920  |                                               | 0        | 2        | 0        | 0        | 1        | 0        | 2        | 5        |     |                                                      |      |      |     |     |     | WD    | WD                |
| C*15:88                                                  | 15:88              | HLA11574  |                                               | 0        | 0        | 2        | 0        | 1        | 0        | 1        | 4        |     |                                                      |      |      |     |     |     |       |                   |
| C*15:89                                                  | 15:89              | HLA11575  |                                               | 0        | 0        | 1        | 0        | 0        | 0        | 0        | 1        |     |                                                      |      |      |     |     |     |       |                   |
| C*15:90                                                  | 15:90              | HLA11576  |                                               | 0        | 0        | 1        | 0        | 0        | 0        | 0        | 1        |     |                                                      |      |      |     |     |     |       |                   |
| C*15:91                                                  | 15:91              | HLA11666  |                                               | 0        | 0        | 1        | 0        | 0        | 0        | 2        | 3        |     |                                                      |      |      |     |     |     |       |                   |
| C*15:92N                                                 | 15:92N             | HLA11667  |                                               | 0        | 1        | 0        | 0        | 0        | 0        | 0        | 1        |     |                                                      |      |      |     |     |     |       |                   |

| Supplemental Table 10: HLA-C Allele Summary <sup>a</sup> |                         |           | Allele Count by Population Group <sup>b</sup> |              |             |               |             |              |             |              |               |          | 3.0.0 CIWD Category by Population Group <sup>c</sup> |          |          |          |          |          |          |                   |
|----------------------------------------------------------|-------------------------|-----------|-----------------------------------------------|--------------|-------------|---------------|-------------|--------------|-------------|--------------|---------------|----------|------------------------------------------------------|----------|----------|----------|----------|----------|----------|-------------------|
| Allele                                                   | Genomic typing          | Allele ID | G group                                       | AFA          | API         | EURO          | MENA        | HIS          | NAM         | UNK          | Total         | AFA      | API                                                  | EURO     | MENA     | HIS      | NAM      | UNK      | Total    | Highest Frequency |
| C*15:93                                                  | 15:93                   | HLA11869  |                                               | 0            | 0           | 0             | 0           | 2            | 0           | 0            | 2             |          |                                                      |          |          |          |          |          |          |                   |
| C*15:94                                                  | 15:94                   | HLA12021  |                                               | 0            | 0           | 2             | 0           | 0            | 0           | 0            | 2             |          |                                                      |          |          |          |          |          |          |                   |
| C*15:101                                                 | 15:101                  | HLA12342  |                                               | 0            | 4           | 0             | 0           | 0            | 0           | 0            | 4             |          |                                                      |          |          |          |          |          |          |                   |
| C*15:102                                                 | 15:102                  | HLA12422  |                                               | 0            | 0           | 1             | 1           | 0            | 1           | 5            | 8             |          |                                                      |          |          |          |          | WD       | WD       | WD                |
| <b>C*15:103 total</b>                                    | <b>15:103 total</b>     |           |                                               | <b>0</b>     | <b>0</b>    | <b>0</b>      | <b>0</b>    | <b>1</b>     | <b>0</b>    | <b>0</b>     | <b>1</b>      |          |                                                      |          |          |          |          |          |          |                   |
| <b>C*15:103:01G total</b>                                | <b>15:103:01G total</b> |           |                                               | <b>0</b>     | <b>0</b>    | <b>0</b>      | <b>0</b>    | <b>1</b>     | <b>0</b>    | <b>0</b>     | <b>1</b>      |          |                                                      |          |          |          |          |          |          |                   |
| C*15:103                                                 | 15:103                  | HLA12572  | 15:103:01G                                    | 0            | 0           | 0             | 0           | 1            | 0           | 0            | 1             |          |                                                      |          |          |          |          |          |          |                   |
| C*15:105Q                                                | 15:105Q                 | HLA12609  |                                               | 0            | 1           | 0             | 0           | 0            | 0           | 0            | 1             |          |                                                      |          |          |          |          |          |          |                   |
| C*15:107                                                 | 15:107                  | HLA13096  |                                               | 0            | 0           | 0             | 0           | 1            | 0           | 0            | 1             |          |                                                      |          |          |          |          |          |          |                   |
| C*15:109                                                 | 15:109                  | HLA13116  |                                               | 0            | 1           | 0             | 0           | 0            | 0           | 0            | 1             |          |                                                      |          |          |          |          |          |          |                   |
| C*15:111                                                 | 15:111                  | HLA13253  |                                               | 0            | 0           | 1             | 0           | 0            | 0           | 0            | 1             |          |                                                      |          |          |          |          |          |          |                   |
| C*15:112                                                 | 15:112                  | HLA13256  |                                               | 0            | 1           | 0             | 0           | 0            | 0           | 0            | 1             |          |                                                      |          |          |          |          |          |          |                   |
| C*15:113                                                 | 15:113                  | HLA13258  |                                               | 0            | 1           | 0             | 0           | 0            | 0           | 0            | 1             |          |                                                      |          |          |          |          |          |          |                   |
| C*15:115N                                                | 15:115N                 | HLA13570  |                                               | 0            | 2           | 0             | 0           | 0            | 0           | 0            | 2             |          |                                                      |          |          |          |          |          |          |                   |
| C*15:119                                                 | 15:119                  | HLA14336  |                                               | 0            | 4           | 0             | 0           | 0            | 0           | 0            | 4             |          |                                                      |          |          |          |          |          |          |                   |
| C*15:122N                                                | 15:122N                 | HLA14610  |                                               | 0            | 1           | 1             | 0           | 2            | 0           | 2            | 6             |          |                                                      |          |          |          |          |          | WD       | WD                |
| C*15:124                                                 | 15:124                  | HLA15058  |                                               | 0            | 7           | 0             | 0           | 0            | 0           | 0            | 7             |          | WD                                                   |          |          |          |          |          | WD       | WD                |
| C*15:126                                                 | 15:126                  | HLA15117  |                                               | 0            | 0           | 1             | 0           | 0            | 0           | 0            | 1             |          |                                                      |          |          |          |          |          |          |                   |
| C*15:129                                                 | 15:129                  | HLA15200  |                                               | 0            | 4           | 0             | 0           | 0            | 0           | 0            | 4             |          |                                                      |          |          |          |          |          |          |                   |
| C*15:CODE                                                | 15:CODE                 |           |                                               | 745          | 4268        | 30763         | 1444        | 3207         | 396         | 5545         | 46368         | NA       | NA                                                   | NA       | NA       | NA       | NA       | NA       | NA       | NA                |
| <b>C*16:01 total</b>                                     | <b>16:01 total</b>      |           |                                               | <b>31231</b> | <b>1317</b> | <b>251361</b> | <b>2883</b> | <b>30863</b> | <b>3114</b> | <b>36426</b> | <b>357195</b> | <b>C</b> | <b>C</b>                                             | <b>C</b> | <b>C</b> | <b>C</b> | <b>C</b> | <b>C</b> | <b>C</b> | <b>C</b>          |
| C*16:01                                                  | 16:01                   |           |                                               | 677          | 32          | 8395          | 106         | 377          | 40          | 366          | 9993          | C        | I                                                    | C        | C        | C        | C        | C        | C        | C                 |
| C*16:01P                                                 | 16:01P                  |           |                                               | 3            | 1           | 397           | 4           | 6            | 0           | 1            | 412           |          |                                                      | I        |          | WD       |          |          | I        | I                 |
| <b>C*16:01:01G total</b>                                 | <b>16:01:01G total</b>  |           |                                               | <b>30548</b> | <b>1282</b> | <b>242542</b> | <b>2771</b> | <b>30463</b> | <b>3074</b> | <b>36040</b> | <b>346720</b> | <b>C</b> | <b>C</b>                                             | <b>C</b> | <b>C</b> | <b>C</b> | <b>C</b> | <b>C</b> | <b>C</b> | <b>C</b>          |
| C*16:01:01G                                              | 16:01:01G               |           | 16:01:01G                                     | 18138        | 889         | 192186        | 2395        | 17409        | 1668        | 27003        | 259688        | C        | C                                                    | C        | C        | C        | C        | C        | C        | C                 |
| C*16:01:01                                               | 16:01:01                |           | 16:01:01G                                     | 12409        | 393         | 50295         | 376         | 13052        | 1405        | 9036         | 86966         | C        | C                                                    | C        | C        | C        | C        | C        | C        | C                 |
| C*16:01:01:01                                            | 16:01:01:01             | HLA00475  | 16:01:01G                                     | 0            | 0           | 59            | 0           | 1            | 0           | 1            | 61            |          |                                                      | WD       |          |          |          |          | WD       | WD                |
| C*16:01:01:02                                            | 16:01:01:02             | HLA13972  | 16:01:01G                                     | 0            | 0           | 0             | 0           | 1            | 0           | 0            | 1             |          |                                                      |          |          |          |          |          |          |                   |
| C*16:01:01:03                                            | 16:01:01:03             | HLA16727  | 16:01:01G                                     | 0            | 0           | 1             | 0           | 0            | 0           | 0            | 1             |          |                                                      |          |          |          |          |          |          |                   |
| C*16:58                                                  | 16:58                   | HLA09503  | 16:01:01G                                     | 1            | 0           | 0             | 0           | 0            | 1           | 0            | 2             |          |                                                      |          |          |          |          |          |          |                   |
| C*16:97                                                  | 16:97                   | HLA14959  | 16:01:01G                                     | 0            | 0           | 1             | 0           | 0            | 0           | 0            | 1             |          |                                                      |          |          |          |          |          |          |                   |

| Supplemental Table 10: HLA-C Allele Summary <sup>a</sup> |                        |           | Allele Count by Population Group <sup>b</sup> |            |              |              |             |             |            |             |              | 3.0.0 CIWD Category by Population Group <sup>c</sup> |          |          |          |          |          |          |          |                   |
|----------------------------------------------------------|------------------------|-----------|-----------------------------------------------|------------|--------------|--------------|-------------|-------------|------------|-------------|--------------|------------------------------------------------------|----------|----------|----------|----------|----------|----------|----------|-------------------|
| Allele                                                   | Genomic typing         | Allele ID | G group                                       | AFA        | API          | EURO         | MENA        | HIS         | NAM        | UNK         | Total        | AFA                                                  | API      | EURO     | MENA     | HIS      | NAM      | UNK      | Total    | Highest Frequency |
| C*16:01:02                                               | 16:01:02               | HLA02041  |                                               | 0          | 0            | 2            | 0           | 0           | 0          | 0           | 2            |                                                      |          |          |          |          |          |          |          |                   |
| C*16:01:04                                               | 16:01:04               | HLA04627  |                                               | 0          | 2            | 11           | 2           | 17          | 0          | 9           | 41           |                                                      |          | WD       |          | I        |          | WD       | WD       | I                 |
| C*16:01:05                                               | 16:01:05               | HLA05596  |                                               | 0          | 0            | 1            | 0           | 0           | 0          | 0           | 1            |                                                      |          |          |          |          |          |          |          |                   |
| C*16:01:07                                               | 16:01:07               | HLA07136  |                                               | 0          | 0            | 1            | 0           | 0           | 0          | 1           | 2            |                                                      |          |          |          |          |          |          |          |                   |
| C*16:01:08                                               | 16:01:08               | HLA08117  |                                               | 0          | 0            | 0            | 0           | 0           | 0          | 1           | 1            |                                                      |          |          |          |          |          |          |          |                   |
| C*16:01:09                                               | 16:01:09               | HLA08161  |                                               | 0          | 0            | 3            | 0           | 0           | 0          | 1           | 4            |                                                      |          |          |          |          |          |          |          |                   |
| C*16:01:10                                               | 16:01:10               | HLA08204  |                                               | 0          | 0            | 1            | 0           | 0           | 0          | 0           | 1            |                                                      |          |          |          |          |          |          |          |                   |
| C*16:01:12                                               | 16:01:12               | HLA09027  |                                               | 1          | 0            | 0            | 0           | 0           | 0          | 0           | 1            |                                                      |          |          |          |          |          |          |          |                   |
| C*16:01:13                                               | 16:01:13               | HLA09028  |                                               | 0          | 0            | 0            | 0           | 0           | 0          | 1           | 1            |                                                      |          |          |          |          |          |          |          |                   |
| C*16:01:14                                               | 16:01:14               | HLA10086  |                                               | 0          | 0            | 1            | 0           | 0           | 0          | 0           | 1            |                                                      |          |          |          |          |          |          |          |                   |
| C*16:01:15                                               | 16:01:15               | HLA10087  |                                               | 2          | 0            | 5            | 0           | 0           | 0          | 4           | 11           |                                                      |          | WD       |          |          |          | WD       | WD       | WD                |
| C*16:01:18                                               | 16:01:18               | HLA11467  |                                               | 0          | 0            | 0            | 0           | 0           | 0          | 1           | 1            |                                                      |          |          |          |          |          |          |          |                   |
| C*16:01:19                                               | 16:01:19               | HLA12193  |                                               | 0          | 0            | 0            | 0           | 0           | 0          | 1           | 1            |                                                      |          |          |          |          |          |          |          |                   |
| C*16:01:20                                               | 16:01:20               | HLA14607  |                                               | 0          | 0            | 1            | 0           | 0           | 0          | 0           | 1            |                                                      |          |          |          |          |          |          |          |                   |
| C*16:01:22                                               | 16:01:22               | HLA15187  |                                               | 0          | 0            | 1            | 0           | 0           | 0          | 0           | 1            |                                                      |          |          |          |          |          |          |          |                   |
| <b>C*16:02 total</b>                                     | <b>16:02 total</b>     |           |                                               | <b>735</b> | <b>24077</b> | <b>48624</b> | <b>8939</b> | <b>4516</b> | <b>571</b> | <b>6923</b> | <b>94385</b> | <b>C</b>                                             | <b>C</b> | <b>C</b> | <b>C</b> | <b>C</b> | <b>C</b> | <b>C</b> | <b>C</b> | <b>C</b>          |
| C*16:02                                                  | 16:02                  |           |                                               | 164        | 847          | 8078         | 1215        | 992         | 203        | 1957        | 13456        | C                                                    | C        | C        | C        | C        | C        | C        | C        | C                 |
| C*16:02P                                                 | 16:02P                 |           |                                               | 0          | 1            | 132          | 1           | 1           | 0          | 0           | 135          |                                                      |          | I        |          |          |          |          | WD       | I                 |
| <b>C*16:02:01G total</b>                                 | <b>16:02:01G total</b> |           |                                               | <b>571</b> | <b>23228</b> | <b>40405</b> | <b>7703</b> | <b>3523</b> | <b>368</b> | <b>4966</b> | <b>80764</b> | <b>C</b>                                             | <b>C</b> | <b>C</b> | <b>C</b> | <b>C</b> | <b>C</b> | <b>C</b> | <b>C</b> | <b>C</b>          |
| C*16:02:01G                                              | 16:02:01G              |           | 16:02:01G                                     | 470        | 22201        | 38341        | 7490        | 2454        | 227        | 4585        | 75768        | C                                                    | C        | C        | C        | C        | C        | C        | C        | C                 |
| C*16:02:01                                               | 16:02:01               | HLA00476  | 16:02:01G                                     | 101        | 1027         | 2064         | 213         | 1069        | 141        | 381         | 4996         | C                                                    | C        | C        | C        | C        | C        | C        | C        | C                 |
| C*16:02:02                                               | 16:02:02               | HLA04604  |                                               | 0          | 0            | 1            | 0           | 0           | 0          | 0           | 1            |                                                      |          |          |          |          |          |          |          |                   |
| C*16:02:03                                               | 16:02:03               | HLA04829  |                                               | 0          | 0            | 0            | 3           | 0           | 0          | 0           | 3            |                                                      |          |          |          |          |          |          |          |                   |
| C*16:02:04                                               | 16:02:04               | HLA04839  |                                               | 0          | 0            | 2            | 11          | 0           | 0          | 0           | 13           |                                                      |          |          | WD       |          |          |          | WD       | WD                |
| C*16:02:05                                               | 16:02:05               | HLA05624  |                                               | 0          | 0            | 0            | 6           | 0           | 0          | 0           | 6            |                                                      |          |          | WD       |          |          |          | WD       | WD                |
| C*16:02:07                                               | 16:02:07               | HLA06438  |                                               | 0          | 0            | 2            | 0           | 0           | 0          | 0           | 2            |                                                      |          |          |          |          |          |          |          |                   |
| C*16:02:08                                               | 16:02:08               | HLA07048  |                                               | 0          | 0            | 2            | 0           | 0           | 0          | 0           | 2            |                                                      |          |          |          |          |          |          |          |                   |
| C*16:02:11                                               | 16:02:11               | HLA10085  |                                               | 0          | 0            | 2            | 0           | 0           | 0          | 0           | 2            |                                                      |          |          |          |          |          |          |          |                   |
| C*16:02:12                                               | 16:02:12               | HLA11257  |                                               | 0          | 1            | 0            | 0           | 0           | 0          | 0           | 1            |                                                      |          |          |          |          |          |          |          |                   |
| <b>C*16:04 total</b>                                     | <b>16:04 total</b>     |           |                                               | <b>381</b> | <b>698</b>   | <b>17725</b> | <b>7850</b> | <b>811</b>  | <b>37</b>  | <b>5607</b> | <b>33109</b> | <b>C</b>                                             | <b>C</b> | <b>C</b> | <b>C</b> | <b>C</b> | <b>C</b> | <b>C</b> | <b>C</b> | <b>C</b>          |
| C*16:04                                                  | 16:04                  |           |                                               | 12         | 12           | 1288         | 554         | 99          | 2          | 203         | 2170         | WD                                                   | WD       | C        | C        | C        |          | C        | C        | C                 |

| Supplemental Table 10: HLA-C Allele Summary <sup>a</sup> |                        |           | Allele Count by Population Group <sup>b</sup> |            |            |              |             |            |           |             |              | 3.0.0 CIWD Category by Population Group <sup>c</sup> |          |           |          |          |          |           |           |                   |
|----------------------------------------------------------|------------------------|-----------|-----------------------------------------------|------------|------------|--------------|-------------|------------|-----------|-------------|--------------|------------------------------------------------------|----------|-----------|----------|----------|----------|-----------|-----------|-------------------|
| Allele                                                   | Genomic typing         | Allele ID | G group                                       | AFA        | API        | EURO         | MENA        | HIS        | NAM       | UNK         | Total        | AFA                                                  | API      | EURO      | MENA     | HIS      | NAM      | UNK       | Total     | Highest Frequency |
| C*16:04P                                                 | 16:04P                 |           |                                               | 0          | 0          | 14           | 0           | 0          | 0         | 0           | 14           |                                                      |          | WD        |          |          |          |           | WD        | WD                |
| <b>C*16:04:01G total</b>                                 | <b>16:04:01G total</b> |           |                                               | <b>369</b> | <b>686</b> | <b>16422</b> | <b>7296</b> | <b>712</b> | <b>35</b> | <b>5404</b> | <b>30924</b> | <b>C</b>                                             | <b>C</b> | <b>C</b>  | <b>C</b> | <b>C</b> | <b>C</b> | <b>C</b>  | <b>C</b>  | <b>C</b>          |
| C*16:04:01G                                              | 16:04:01G              |           | 16:04:01G                                     | 8          | 342        | 944          | 335         | 12         | 0         | 62          | 1703         | WD                                                   | C        | I         | C        | I        |          | I         | C         | C                 |
| C*16:04:01                                               | 16:04:01               |           | 16:04:01G                                     | 360        | 344        | 15438        | 6948        | 690        | 35        | 5337        | 29152        | C                                                    | C        | C         | C        | C        | C        | C         | C         | C                 |
| C*16:04:01:01                                            | 16:04:01:01            | HLA00478  | 16:04:01G                                     | 1          | 0          | 39           | 13          | 10         | 0         | 4           | 67           |                                                      |          | WD        | WD       | I        |          |           | WD        | I                 |
| C*16:04:01:02                                            | 16:04:01:02            | HLA16842  | 16:04:01G                                     | 0          | 0          | 1            | 0           | 0          | 0         | 1           | 2            |                                                      |          |           |          |          |          |           |           |                   |
| C*16:04:03                                               | 16:04:03               | HLA12719  |                                               | 0          | 0          | 1            | 0           | 0          | 0         | 0           | 1            |                                                      |          |           |          |          |          |           |           |                   |
| C*16:06                                                  | 16:06                  | HLA01708  |                                               | 0          | 0          | 1            | 0           | 0          | 0         | 0           | 1            |                                                      |          |           |          |          |          |           |           |                   |
| <b>C*16:07 total</b>                                     | <b>16:07 total</b>     |           |                                               | <b>6</b>   | <b>0</b>   | <b>14</b>    | <b>0</b>    | <b>1</b>   | <b>0</b>  | <b>2</b>    | <b>23</b>    | <b>WD</b>                                            |          | <b>WD</b> |          |          |          |           | <b>WD</b> | <b>WD</b>         |
| C*16:07                                                  | 16:07                  |           |                                               | 1          | 0          | 4            | 0           | 0          | 0         | 0           | 5            |                                                      |          |           |          |          |          |           | WD        | WD                |
| C*16:07:01                                               | 16:07:01               | HLA02242  |                                               | 0          | 0          | 9            | 0           | 1          | 0         | 1           | 11           |                                                      |          | WD        |          |          |          |           | WD        | WD                |
| C*16:07:02                                               | 16:07:02               | HLA06276  |                                               | 5          | 0          | 1            | 0           | 0          | 0         | 1           | 7            | WD                                                   |          |           |          |          |          |           | WD        | WD                |
| C*16:08                                                  | 16:08                  | HLA02303  |                                               | 7          | 0          | 0            | 0           | 0          | 0         | 0           | 7            | WD                                                   |          |           |          |          |          |           | WD        | WD                |
| C*16:09                                                  | 16:09                  | HLA02686  |                                               | 0          | 0          | 1            | 1           | 10         | 0         | 1           | 13           |                                                      |          |           |          | I        |          |           | WD        | I                 |
| C*16:10                                                  | 16:10                  | HLA03115  |                                               | 0          | 0          | 1            | 0           | 0          | 0         | 0           | 1            |                                                      |          |           |          |          |          |           |           |                   |
| C*16:12                                                  | 16:12                  | HLA03425  |                                               | 0          | 18         | 1            | 4           | 3          | 0         | 0           | 26           |                                                      | I        |           |          |          |          |           | WD        | I                 |
| C*16:13                                                  | 16:13                  | HLA03726  |                                               | 0          | 0          | 12           | 0           | 0          | 0         | 0           | 12           |                                                      |          | WD        |          |          |          |           | WD        | WD                |
| C*16:14                                                  | 16:14                  | HLA03738  |                                               | 0          | 0          | 49           | 0           | 0          | 0         | 4           | 53           |                                                      |          | WD        |          |          |          |           | WD        | WD                |
| <b>C*16:15 total</b>                                     | <b>16:15 total</b>     |           |                                               | <b>1</b>   | <b>2</b>   | <b>22</b>    | <b>95</b>   | <b>0</b>   | <b>0</b>  | <b>7</b>    | <b>127</b>   |                                                      |          | <b>WD</b> | <b>C</b> |          |          | <b>WD</b> | <b>WD</b> | <b>C</b>          |
| C*16:15                                                  | 16:15                  |           |                                               | 0          | 1          | 1            | 0           | 0          | 0         | 0           | 2            |                                                      |          |           |          |          |          |           |           |                   |
| C*16:15:01                                               | 16:15:01               | HLA04321  |                                               | 1          | 1          | 21           | 95          | 0          | 0         | 7           | 125          |                                                      |          | WD        | C        |          |          | WD        | WD        | C                 |
| C*16:16Q                                                 | 16:16Q                 | HLA04333  |                                               | 1          | 1          | 18           | 0           | 0          | 0         | 0           | 20           |                                                      |          | WD        |          |          |          |           | WD        | WD                |
| C*16:18                                                  | 16:18                  | HLA04599  |                                               | 0          | 0          | 19           | 0           | 0          | 0         | 2           | 21           |                                                      |          | WD        |          |          |          |           | WD        | WD                |
| C*16:19                                                  | 16:19                  | HLA04632  |                                               | 0          | 37         | 0            | 0           | 0          | 0         | 1           | 38           |                                                      | I        |           |          |          |          |           | WD        | I                 |
| C*16:20                                                  | 16:20                  | HLA04698  |                                               | 3          | 0          | 0            | 0           | 0          | 0         | 0           | 3            |                                                      |          |           |          |          |          |           |           |                   |
| C*16:21                                                  | 16:21                  | HLA04767  |                                               | 0          | 0          | 10           | 0           | 0          | 0         | 0           | 10           |                                                      |          | WD        |          |          |          |           | WD        | WD                |
| C*16:22                                                  | 16:22                  | HLA05163  |                                               | 7          | 0          | 1            | 0           | 0          | 0         | 1           | 9            | WD                                                   |          |           |          |          |          |           | WD        | WD                |
| C*16:24                                                  | 16:24                  | HLA05182  |                                               | 1          | 0          | 4            | 0           | 3          | 0         | 2           | 10           |                                                      |          |           |          |          |          |           | WD        | WD                |
| C*16:25                                                  | 16:25                  | HLA05208  |                                               | 5          | 0          | 5            | 1           | 0          | 0         | 2           | 13           | WD                                                   |          | WD        |          |          |          |           | WD        | WD                |
| C*16:26                                                  | 16:26                  | HLA05217  |                                               | 0          | 0          | 6            | 1           | 2          | 1         | 1           | 11           |                                                      |          | WD        |          |          |          |           | WD        | WD                |
| C*16:27                                                  | 16:27                  | HLA05521  |                                               | 0          | 0          | 3            | 0           | 0          | 0         | 0           | 3            |                                                      |          |           |          |          |          |           |           |                   |

| Supplemental Table 10: HLA-C Allele Summary <sup>a</sup> |                    |           | Allele Count by Population Group <sup>b</sup> |          |          |          |          |          |          |          |          | 3.0.0 CIWD Category by Population Group <sup>c</sup> |     |      |      |     |     |     |       |                   |
|----------------------------------------------------------|--------------------|-----------|-----------------------------------------------|----------|----------|----------|----------|----------|----------|----------|----------|------------------------------------------------------|-----|------|------|-----|-----|-----|-------|-------------------|
| Allele                                                   | Genomic typing     | Allele ID | G group                                       | AFA      | API      | EURO     | MENA     | HIS      | NAM      | UNK      | Total    | AFA                                                  | API | EURO | MENA | HIS | NAM | UNK | Total | Highest Frequency |
| C*16:30N                                                 | 16:30N             | HLA05589  |                                               | 0        | 31       | 1        | 0        | 0        | 0        | 0        | 32       |                                                      | I   |      |      |     |     |     | WD    | I                 |
| C*16:33                                                  | 16:33              | HLA06395  |                                               | 0        | 0        | 0        | 2        | 0        | 0        | 12       | 14       |                                                      |     |      |      |     |     | WD  | WD    | WD                |
| C*16:35                                                  | 16:35              | HLA06448  |                                               | 0        | 0        | 1        | 0        | 0        | 0        | 0        | 1        |                                                      |     |      |      |     |     |     |       |                   |
| C*16:37                                                  | 16:37              | HLA06708  |                                               | 0        | 0        | 4        | 0        | 0        | 0        | 11       | 15       |                                                      |     |      |      |     |     | WD  | WD    | WD                |
| C*16:38                                                  | 16:38              | HLA06778  |                                               | 0        | 0        | 55       | 0        | 1        | 0        | 6        | 62       |                                                      |     | WD   |      |     |     | WD  | WD    | WD                |
| <b>C*16:39 total</b>                                     | <b>16:39 total</b> |           |                                               | <b>0</b> | <b>0</b> | <b>0</b> | <b>0</b> | <b>0</b> | <b>0</b> | <b>1</b> | <b>1</b> |                                                      |     |      |      |     |     |     |       |                   |
| C*16:39:01                                               | 16:39:01           | HLA06890  |                                               | 0        | 0        | 0        | 0        | 0        | 0        | 1        | 1        |                                                      |     |      |      |     |     |     |       |                   |
| C*16:40                                                  | 16:40              | HLA07054  |                                               | 1        | 0        | 0        | 0        | 0        | 0        | 1        | 2        |                                                      |     |      |      |     |     |     |       |                   |
| C*16:42                                                  | 16:42              | HLA07112  |                                               | 0        | 0        | 0        | 0        | 0        | 0        | 2        | 2        |                                                      |     |      |      |     |     |     |       |                   |
| C*16:43                                                  | 16:43              | HLA07229  |                                               | 2        | 0        | 0        | 0        | 0        | 0        | 0        | 2        |                                                      |     |      |      |     |     |     |       |                   |
| C*16:45                                                  | 16:45              | HLA07744  |                                               | 4        | 0        | 0        | 0        | 0        | 0        | 0        | 4        |                                                      |     |      |      |     |     |     |       |                   |
| C*16:46                                                  | 16:46              | HLA07848  |                                               | 17       | 0        | 4        | 23       | 0        | 0        | 3        | 47       | WD                                                   |     |      | WD   |     |     |     | WD    | WD                |
| C*16:49                                                  | 16:49              | HLA07851  |                                               | 0        | 0        | 2        | 0        | 0        | 0        | 0        | 2        |                                                      |     |      |      |     |     |     |       |                   |
| C*16:50                                                  | 16:50              | HLA08162  |                                               | 11       | 0        | 1        | 0        | 0        | 0        | 6        | 18       | WD                                                   |     |      |      |     |     | WD  | WD    | WD                |
| C*16:51                                                  | 16:51              | HLA08163  |                                               | 0        | 0        | 0        | 0        | 1        | 0        | 0        | 1        |                                                      |     |      |      |     |     |     |       |                   |
| C*16:52                                                  | 16:52              | HLA08203  |                                               | 0        | 0        | 5        | 0        | 0        | 0        | 0        | 5        |                                                      |     | WD   |      |     |     |     | WD    | WD                |
| C*16:53                                                  | 16:53              | HLA08811  |                                               | 0        | 0        | 1        | 0        | 0        | 0        | 0        | 1        |                                                      |     |      |      |     |     |     |       |                   |
| C*16:54                                                  | 16:54              | HLA08892  |                                               | 0        | 0        | 1        | 0        | 0        | 0        | 0        | 1        |                                                      |     |      |      |     |     |     |       |                   |
| C*16:56                                                  | 16:56              | HLA09115  |                                               | 0        | 0        | 1        | 0        | 0        | 0        | 0        | 1        |                                                      |     |      |      |     |     |     |       |                   |
| C*16:59                                                  | 16:59              | HLA09612  |                                               | 0        | 0        | 0        | 0        | 1        | 0        | 0        | 1        |                                                      |     |      |      |     |     |     |       |                   |
| C*16:60                                                  | 16:60              | HLA10083  |                                               | 0        | 0        | 2        | 0        | 0        | 0        | 0        | 2        |                                                      |     |      |      |     |     |     |       |                   |
| C*16:61                                                  | 16:61              | HLA10433  |                                               | 0        | 0        | 0        | 0        | 1        | 0        | 0        | 1        |                                                      |     |      |      |     |     |     |       |                   |
| C*16:64                                                  | 16:64              | HLA10927  |                                               | 0        | 0        | 2        | 0        | 0        | 0        | 0        | 2        |                                                      |     |      |      |     |     |     |       |                   |
| C*16:65                                                  | 16:65              | HLA11090  |                                               | 1        | 0        | 0        | 0        | 0        | 0        | 1        | 2        |                                                      |     |      |      |     |     |     |       |                   |
| C*16:69                                                  | 16:69              | HLA11098  |                                               | 0        | 1        | 0        | 0        | 0        | 0        | 0        | 1        |                                                      |     |      |      |     |     |     |       |                   |
| C*16:71                                                  | 16:71              | HLA11862  |                                               | 0        | 0        | 0        | 0        | 0        | 0        | 3        | 3        |                                                      |     |      |      |     |     |     |       |                   |
| C*16:73                                                  | 16:73              | HLA11973  |                                               | 0        | 0        | 3        | 0        | 0        | 0        | 0        | 3        |                                                      |     |      |      |     |     |     |       |                   |
| C*16:74                                                  | 16:74              | HLA12044  |                                               | 0        | 0        | 7        | 0        | 0        | 0        | 0        | 7        |                                                      |     | WD   |      |     |     |     | WD    | WD                |
| C*16:76                                                  | 16:76              | HLA12191  |                                               | 0        | 0        | 1        | 0        | 0        | 0        | 0        | 1        |                                                      |     |      |      |     |     |     |       |                   |
| C*16:77N                                                 | 16:77N             | HLA12608  |                                               | 0        | 0        | 1        | 1        | 0        | 0        | 0        | 2        |                                                      |     |      |      |     |     |     |       |                   |
| C*16:78                                                  | 16:78              | HLA12673  |                                               | 0        | 0        | 2        | 0        | 0        | 0        | 0        | 2        |                                                      |     |      |      |     |     |     |       |                   |

| Supplemental Table 10: HLA-C Allele Summary <sup>a</sup> |                        |           | Allele Count by Population Group <sup>b</sup> |              |             |               |              |              |             |              |               | 3.0.0 CIWD Category by Population Group <sup>c</sup> |          |          |          |          |          |          |          |                   |
|----------------------------------------------------------|------------------------|-----------|-----------------------------------------------|--------------|-------------|---------------|--------------|--------------|-------------|--------------|---------------|------------------------------------------------------|----------|----------|----------|----------|----------|----------|----------|-------------------|
| Allele                                                   | Genomic typing         | Allele ID | G group                                       | AFA          | API         | EURO          | MENA         | HIS          | NAM         | UNK          | Total         | AFA                                                  | API      | EURO     | MENA     | HIS      | NAM      | UNK      | Total    | Highest Frequency |
| C*16:82                                                  | 16:82                  | HLA13103  |                                               | 0            | 0           | 0             | 0            | 0            | 0           | 1            | 1             |                                                      |          |          |          |          |          |          |          |                   |
| C*16:84                                                  | 16:84                  | HLA13417  |                                               | 0            | 0           | 2             | 0            | 0            | 0           | 0            | 2             |                                                      |          |          |          |          |          |          |          |                   |
| C*16:85                                                  | 16:85                  | HLA13486  |                                               | 0            | 0           | 1             | 0            | 0            | 0           | 0            | 1             |                                                      |          |          |          |          |          |          |          |                   |
| C*16:86                                                  | 16:86                  | HLA13743  |                                               | 2            | 0           | 0             | 0            | 0            | 0           | 0            | 2             |                                                      |          |          |          |          |          |          |          |                   |
| C*16:88                                                  | 16:88                  | HLA14254  |                                               | 0            | 6           | 0             | 0            | 0            | 0           | 0            | 6             |                                                      | WD       |          |          |          |          |          | WD       | WD                |
| C*16:89N                                                 | 16:89N                 | HLA14257  |                                               | 0            | 1           | 0             | 0            | 0            | 0           | 0            | 1             |                                                      |          |          |          |          |          |          |          |                   |
| C*16:91                                                  | 16:91                  | HLA14531  |                                               | 0            | 1           | 0             | 0            | 0            | 0           | 0            | 1             |                                                      |          |          |          |          |          |          |          |                   |
| C*16:93                                                  | 16:93                  | HLA14609  |                                               | 0            | 0           | 1             | 0            | 0            | 0           | 0            | 1             |                                                      |          |          |          |          |          |          |          |                   |
| C*16:CODE                                                | 16:CODE                |           |                                               | 4339         | 719         | 38715         | 1042         | 5059         | 558         | 6359         | 56791         | NA                                                   | NA       | NA       | NA       | NA       | NA       | NA       | NA       | NA                |
| <b>C*17:01 total</b>                                     | <b>17:01 total</b>     |           |                                               | <b>25323</b> | <b>3183</b> | <b>126706</b> | <b>12964</b> | <b>11099</b> | <b>1210</b> | <b>26099</b> | <b>206584</b> | <b>C</b>                                             | <b>C</b> | <b>C</b> | <b>C</b> | <b>C</b> | <b>C</b> | <b>C</b> | <b>C</b> | <b>C</b>          |
| C*17:01                                                  | 17:01                  |           |                                               | 92           | 0           | 518           | 10           | 28           | 0           | 105          | 753           | C                                                    |          | I        | WD       | I        |          | I        | I        | C                 |
| C*17:01P                                                 | 17:01P                 |           |                                               | 0            | 0           | 224           | 3            | 1            | 0           | 0            | 228           |                                                      |          | I        |          |          |          | I        | I        |                   |
| <b>C*17:01:01G total</b>                                 | <b>17:01:01G total</b> |           |                                               | <b>25047</b> | <b>3148</b> | <b>123451</b> | <b>12866</b> | <b>10475</b> | <b>1157</b> | <b>25630</b> | <b>201774</b> | <b>C</b>                                             | <b>C</b> | <b>C</b> | <b>C</b> | <b>C</b> | <b>C</b> | <b>C</b> | <b>C</b> | <b>C</b>          |
| C*17:01:01G                                              | 17:01:01G              |           | 17:01:01G                                     | 20941        | 2979        | 121004        | 12512        | 8516         | 944         | 24344        | 191240        | C                                                    | C        | C        | C        | C        | C        | C        | C        | C                 |
| C*17:01:01                                               | 17:01:01               |           | 17:01:01G                                     | 2514         | 55          | 634           | 136          | 867          | 108         | 674          | 4988          | C                                                    | I        | I        | C        | C        | C        | C        | C        | C                 |
| C*17:01:01:02                                            | 17:01:01:02            | HLA04311  | 17:01:01G                                     | 1457         | 12          | 77            | 14           | 404          | 71          | 337          | 2372          | C                                                    | WD       | WD       | WD       | C        | C        | C        | C        | C                 |
| C*17:01:01:05                                            | 17:01:01:05            | HLA14101  | 17:01:01G                                     | 105          | 95          | 1320          | 190          | 572          | 28          | 220          | 2530          | C                                                    | I        | C        | C        | C        | C        | C        | C        | C                 |
| C*17:02                                                  | 17:02                  | HLA00482  | 17:01:01G                                     | 0            | 0           | 1             | 0            | 0            | 0           | 0            | 1             |                                                      |          |          |          |          |          |          |          |                   |
| <b>C*17:03 total</b>                                     | <b>17:03 total</b>     |           |                                               | <b>210</b>   | <b>41</b>   | <b>2883</b>   | <b>89</b>    | <b>711</b>   | <b>59</b>   | <b>414</b>   | <b>4407</b>   | <b>C</b>                                             | <b>I</b> | <b>C</b> | <b>C</b> | <b>C</b> | <b>C</b> | <b>C</b> | <b>C</b> | <b>C</b>          |
| C*17:03                                                  | 17:03                  |           |                                               | 180          | 34          | 2469          | 75           | 595          | 53          | 359          | 3765          | C                                                    | I        | C        | C        | C        | C        | C        | C        | C                 |
| C*17:03:01                                               | 17:03:01               |           | 17:01:01G                                     | 30           | 7           | 413           | 14           | 116          | 6           | 55           | 641           | WD                                                   | WD       | I        | WD       | C        | WD       | I        | I        | C                 |
| C*17:03:01:01                                            | 17:03:01:01            | HLA00993  | 17:01:01G                                     | 0            | 0           | 1             | 0            | 0            | 0           | 0            | 1             |                                                      |          |          |          |          |          |          |          |                   |
| C*17:38                                                  | 17:38                  | HLA17282  | 17:01:01G                                     | 0            | 0           | 1             | 0            | 0            | 0           | 0            | 1             |                                                      |          |          |          |          |          |          |          |                   |
| C*17:01:02                                               | 17:01:02               | HLA04628  |                                               | 2            | 0           | 0             | 0            | 0            | 0           | 0            | 2             |                                                      |          |          |          |          |          |          |          |                   |
| C*17:01:03                                               | 17:01:03               | HLA04631  |                                               | 0            | 0           | 34            | 0            | 0            | 0           | 2            | 36            |                                                      |          | WD       |          |          |          |          | WD       | WD                |
| C*17:01:04                                               | 17:01:04               | HLA05177  |                                               | 1            | 1           | 7             | 8            | 0            | 0           | 2            | 19            |                                                      |          | WD       | WD       |          |          |          | WD       | WD                |
| C*17:01:05                                               | 17:01:05               | HLA05568  |                                               | 1            | 0           | 0             | 0            | 0            | 0           | 0            | 1             |                                                      |          |          |          |          |          |          |          |                   |
| C*17:01:07                                               | 17:01:07               | HLA07115  |                                               | 0            | 0           | 0             | 2            | 0            | 0           | 0            | 2             |                                                      |          |          |          |          |          |          |          |                   |
| C*17:01:09                                               | 17:01:09               | HLA08208  |                                               | 0            | 0           | 3             | 0            | 0            | 0           | 0            | 3             |                                                      |          |          |          |          |          |          |          |                   |
| C*17:01:11                                               | 17:01:11               | HLA11662  |                                               | 0            | 0           | 0             | 0            | 0            | 0           | 1            | 1             |                                                      |          |          |          |          |          |          |          |                   |
| C*17:04                                                  | 17:04                  | HLA02319  |                                               | 28           | 0           | 0             | 1            | 1            | 2           | 15           | 47            | WD                                                   |          |          |          |          |          | I        | WD       | I                 |



| Supplemental Table 10: HLA-C Allele Summary <sup>a</sup> |                        |           | Allele Count by Population Group <sup>b</sup> |              |            |             |            |             |            |             |              | 3.0.0 CIWD Category by Population Group <sup>c</sup> |          |          |          |          |          |          |          |                   |
|----------------------------------------------------------|------------------------|-----------|-----------------------------------------------|--------------|------------|-------------|------------|-------------|------------|-------------|--------------|------------------------------------------------------|----------|----------|----------|----------|----------|----------|----------|-------------------|
| Allele                                                   | Genomic typing         | Allele ID | G group                                       | AFA          | API        | EURO        | MENA       | HIS         | NAM        | UNK         | Total        | AFA                                                  | API      | EURO     | MENA     | HIS      | NAM      | UNK      | Total    | Highest Frequency |
| C*17:05                                                  | 17:05                  | HLA03545  |                                               | 0            | 0          | 0           | 0          | 1           | 0          | 0           | 1            |                                                      |          |          |          |          |          |          |          |                   |
| C*17:07                                                  | 17:07                  | HLA05211  |                                               | 0            | 0          | 14          | 0          | 0           | 0          | 1           | 15           |                                                      |          | WD       |          |          |          |          | WD       | WD                |
| C*17:09                                                  | 17:09                  | HLA06427  |                                               | 4            | 0          | 0           | 0          | 0           | 0          | 0           | 4            |                                                      |          |          |          |          |          |          |          |                   |
| C*17:10                                                  | 17:10                  | HLA07068  |                                               | 0            | 0          | 3           | 0          | 0           | 0          | 0           | 3            |                                                      |          |          |          |          |          |          |          |                   |
| C*17:11                                                  | 17:11                  | HLA07233  |                                               | 0            | 1          | 1           | 1          | 0           | 0          | 0           | 3            |                                                      |          |          |          |          |          |          |          |                   |
| C*17:14                                                  | 17:14                  | HLA08531  |                                               | 1            | 0          | 0           | 0          | 0           | 0          | 0           | 1            |                                                      |          |          |          |          |          |          |          |                   |
| C*17:15                                                  | 17:15                  | HLA08750  |                                               | 0            | 0          | 1           | 0          | 0           | 0          | 1           | 2            |                                                      |          |          |          |          |          |          |          |                   |
| C*17:17                                                  | 17:17                  | HLA09031  |                                               | 0            | 0          | 1           | 0          | 0           | 0          | 0           | 1            |                                                      |          |          |          |          |          |          |          |                   |
| C*17:18                                                  | 17:18                  | HLA09032  |                                               | 0            | 0          | 1           | 1          | 0           | 0          | 0           | 2            |                                                      |          |          |          |          |          |          |          |                   |
| C*17:19                                                  | 17:19                  | HLA09033  |                                               | 0            | 0          | 1           | 0          | 0           | 0          | 0           | 1            |                                                      |          |          |          |          |          |          |          |                   |
| C*17:20                                                  | 17:20                  | HLA10056  |                                               | 0            | 0          | 2           | 0          | 0           | 0          | 0           | 2            |                                                      |          |          |          |          |          |          |          |                   |
| C*17:21                                                  | 17:21                  | HLA10093  |                                               | 2            | 0          | 0           | 0          | 0           | 0          | 0           | 2            |                                                      |          |          |          |          |          |          |          |                   |
| C*17:22                                                  | 17:22                  | HLA10262  |                                               | 0            | 0          | 0           | 2          | 0           | 0          | 1           | 3            |                                                      |          |          |          |          |          |          |          |                   |
| C*17:23                                                  | 17:23                  | HLA10510  |                                               | 4            | 0          | 0           | 0          | 0           | 0          | 1           | 5            |                                                      |          |          |          |          |          |          | WD       | WD                |
| C*17:26                                                  | 17:26                  | HLA12337  |                                               | 1            | 0          | 0           | 0          | 0           | 0          | 0           | 1            |                                                      |          |          |          |          |          |          |          |                   |
| C*17:28                                                  | 17:28                  | HLA12508  |                                               | 0            | 0          | 0           | 2          | 0           | 0          | 0           | 2            |                                                      |          |          |          |          |          |          |          |                   |
| C*17:32                                                  | 17:32                  | HLA14867  |                                               | 0            | 0          | 1           | 0          | 0           | 0          | 0           | 1            |                                                      |          |          |          |          |          |          |          |                   |
| C*17:CODE                                                | 17:CODE                |           |                                               | 1545         | 63         | 4255        | 138        | 881         | 93         | 778         | 7753         | NA                                                   | NA       | NA       | NA       | NA       | NA       | NA       | NA       | NA                |
| <b>C*18:01 total</b>                                     | <b>18:01 total</b>     |           |                                               | <b>12643</b> | <b>110</b> | <b>2976</b> | <b>714</b> | <b>1841</b> | <b>259</b> | <b>3104</b> | <b>21647</b> | <b>C</b>                                             | <b>I</b> | <b>C</b> | <b>C</b> | <b>C</b> | <b>C</b> | <b>C</b> | <b>C</b> | <b>C</b>          |
| <b>C*18:01:01G total</b>                                 | <b>18:01:01G total</b> |           |                                               | <b>12643</b> | <b>110</b> | <b>2976</b> | <b>714</b> | <b>1841</b> | <b>259</b> | <b>3104</b> | <b>21647</b> | <b>C</b>                                             | <b>I</b> | <b>C</b> | <b>C</b> | <b>C</b> | <b>C</b> | <b>C</b> | <b>C</b> | <b>C</b>          |
| C*18:01                                                  | 18:01                  | HLA00483  | 18:01:01G                                     | 734          | 3          | 42          | 3          | 129         | 16         | 182         | 1109         | C                                                    |          | WD       |          | C        | C        | C        | I        | C                 |
| C*18:01P                                                 | 18:01P                 |           | 18:01:01G                                     | 2            | 0          | 9           | 0          | 0           | 0          | 0           | 11           |                                                      |          | WD       |          |          |          |          | WD       | WD                |
| C*18:01:01G                                              | 18:01:01G              |           | 18:01:01G                                     | 10682        | 100        | 2782        | 694        | 1460        | 198        | 2672        | 18588        | C                                                    | I        | C        | C        | C        | C        | C        | C        | C                 |
| C*18:02                                                  | 18:02                  | HLA00484  | 18:01:01G                                     | 1225         | 7          | 143         | 17         | 252         | 45         | 250         | 1939         | C                                                    | WD       | I        | WD       | C        | C        | C        | C        | C                 |
| C*18:03                                                  | 18:03                  | HLA02839  |                                               | 8            | 0          | 0           | 0          | 1           | 0          | 6           | 15           | WD                                                   |          |          |          |          |          | WD       | WD       | WD                |
| C*18:04                                                  | 18:04                  | HLA05601  |                                               | 17           | 0          | 3           | 0          | 2           | 0          | 3           | 25           | WD                                                   |          |          |          |          |          |          | WD       | WD                |
| C*18:05                                                  | 18:05                  | HLA06443  |                                               | 2            | 0          | 0           | 0          | 0           | 0          | 1           | 3            |                                                      |          |          |          |          |          |          |          |                   |
| C*18:06                                                  | 18:06                  | HLA08690  |                                               | 27           | 0          | 0           | 0          | 0           | 0          | 3           | 30           | WD                                                   |          |          |          |          |          |          | WD       | WD                |
| C*18:07N                                                 | 18:07N                 | HLA09600  |                                               | 1            | 0          | 0           | 0          | 0           | 0          | 0           | 1            |                                                      |          |          |          |          |          |          |          |                   |
| C*18:09                                                  | 18:09                  | HLA12339  |                                               | 1            | 0          | 0           | 0          | 0           | 0          | 0           | 1            |                                                      |          |          |          |          |          |          |          |                   |
| C*18:10                                                  | 18:10                  | HLA14214  |                                               | 0            | 0          | 0           | 0          | 0           | 0          | 1           | 1            |                                                      |          |          |          |          |          |          |          |                   |

| Supplemental Table 10: HLA-C Allele Summary <sup>a</sup> |                |           | Allele Count by Population Group <sup>b</sup> |               |                |                 |               |               |              |                |                 | 3.0.0 CIWD Category by Population Group <sup>c</sup> |     |      |      |     |     |     |       |                   |
|----------------------------------------------------------|----------------|-----------|-----------------------------------------------|---------------|----------------|-----------------|---------------|---------------|--------------|----------------|-----------------|------------------------------------------------------|-----|------|------|-----|-----|-----|-------|-------------------|
| Allele                                                   | Genomic typing | Allele ID | G group                                       | AFA           | API            | EURO            | MENA          | HIS           | NAM          | UNK            | Total           | AFA                                                  | API | EURO | MENA | HIS | NAM | UNK | Total | Highest Frequency |
| C*18:CODE                                                | 18:CODE        |           |                                               | 42            | 0              | 11              | 3             | 17            | 3            | 15             | 91              | NA                                                   | NA  | NA   | NA   | NA  | NA  | NA  | NA    | NA                |
| C*NEW <sup>d</sup>                                       | NEW            |           |                                               | 0             | 0              | 1               | 0             | 2             | 0            | 0              | 3               | NA                                                   | NA  | NA   | NA   | NA  | NA  | NA  | NA    | NA                |
| <b>C*Total <sup>e</sup></b>                              | <b>Total</b>   |           |                                               | <b>389619</b> | <b>1255403</b> | <b>11827887</b> | <b>403229</b> | <b>690043</b> | <b>67072</b> | <b>1302662</b> | <b>15935915</b> |                                                      |     |      |      |     |     |     |       |                   |

C, common; I, intermediate; WD, well-documented; NA, not applicable

<sup>a</sup> All alleles observed in the current dataset are included in this table. Note that alleles are not in numerical order; alleles within a G group are clustered together. P group "two-field" total (e.g., written as "C\*01:02 total") and G group total summary rows are provided. The table does not list all alleles from IPD-IMGT version 3.31.0, if not present in the study dataset.

<sup>b</sup> Population groups include: AFA (African/African American), API (Asian/Pacific Islands), EURO (European/European descent), MENA (Middle East/North Coast of Africa), HIS (South or Central America/Hispanic/Latino), NAM (Native American populations) and UNK (unknown/not asked/multiple ancestries/other). Total is the overall population i.e., all groups combined.

<sup>c</sup> Allele frequency is calculated by dividing the number of times the "allele" of interest is observed in a population by the total number of copies of all the alleles at that particular genetic locus in the population (reported as the last row in this table and also in Table 2b). The total number of copies is calculated by multiplying the number of individuals times two for all loci except DRB3/4/5. For DRB3/4/5, the number of assignments was used as the total. The CIWD status is determined based on the allele frequency. Allele frequency data will be provided on the website of the next International HLA and Immunogenetics Workshop (<https://www.ihw18.org/>). Highest frequency is the highest CIWD designation among all the individual groups.

<sup>d</sup> "CODE" is generically defined as a summary category of submitted HLA typing, including NMDP multiple allele codes, with ambiguities that are not within a single P or G group. "NEW" is a summary category for assignments of novel alleles that did not yet receive a nomenclature assignment. The CODE and NEW categories add to the total number of alleles but should not be assigned CIWD designations (labeled as NA, not applicable) as they do not represent a consistent allele designation (i.e., the NEW category may contain alleles with different DNA sequences that are unrelated to one another).

<sup>e</sup> C\*Total is the total number of allele assignments for the population group and is based on two times the number of individuals in the group. This number is also listed in Table 2b. It is not the sum of the column as alleles are not counted more than once. For example, when evaluating frequencies at the level of G resolution, individual alleles that make up the G group (e.g., A\*80:01:01, A\*80:01:01:01, A\*80:01:01:02, A\*80:01:01G) are not included in the count because these alleles are summed up in the total G designation (e.g., "A\*80:01:01G total").
