# Supplementary material for: Common, intermediate and well‐documented HLA alleles in world populations: CIWD version 3.0.0
Source: PubMed Central journal article supplement (PMC7317522; doi:10.1111/tan.13811), 2020-01-31
Supplement: TAN-95-516-s011.pdf [file TAN-95-516-s011.pdf]

| Supplemental Table 11: HLA-DRB1 Allele Summary <sup>a</sup> |                        |           | Allele Count by Population Group <sup>b</sup> |             |              |                |              |              |             |              |                | 3.0.0 CIWD Category by Population Group <sup>c</sup> |          |          |          |          |          |          |          |                   |
|-------------------------------------------------------------|------------------------|-----------|-----------------------------------------------|-------------|--------------|----------------|--------------|--------------|-------------|--------------|----------------|------------------------------------------------------|----------|----------|----------|----------|----------|----------|----------|-------------------|
| Allele                                                      | Genomic Typing         | Allele ID | G group                                       | AFA         | API          | EURO           | MENA         | HIS          | NAM         | UNK          | Total          | AFA                                                  | API      | EURO     | MENA     | HIS      | NAM      | UNK      | Total    | Highest Frequency |
| <b>DRB1*01:01 total</b>                                     | <b>01:01 total</b>     |           |                                               | <b>9405</b> | <b>38257</b> | <b>1083192</b> | <b>13159</b> | <b>30699</b> | <b>3157</b> | <b>80072</b> | <b>1257941</b> | <b>C</b>                                             | <b>C</b> | <b>C</b> | <b>C</b> | <b>C</b> | <b>C</b> | <b>C</b> | <b>C</b> | <b>C</b>          |
| DRB1*01:01                                                  | 01:01                  |           |                                               | 447         | 240          | 24980          | 416          | 745          | 49          | 1696         | 28573          | C                                                    | C        | C        | C        | C        | C        | C        | C        | C                 |
| DRB1*01:01P                                                 | 01:01P                 |           |                                               | 0           | 2            | 796            | 1            | 3            | 0           | 1            | 803            |                                                      |          | I        |          |          |          |          | I        | I                 |
| <b>DRB1*01:01:01G total</b>                                 | <b>01:01:01G total</b> |           |                                               | <b>8667</b> | <b>38001</b> | <b>1057137</b> | <b>12741</b> | <b>29902</b> | <b>3102</b> | <b>78304</b> | <b>1227854</b> | <b>C</b>                                             | <b>C</b> | <b>C</b> | <b>C</b> | <b>C</b> | <b>C</b> | <b>C</b> | <b>C</b> | <b>C</b>          |
| DRB1*01:01:01G                                              | 01:01:01G              |           | 01:01:01G                                     | 3105        | 23773        | 176152         | 2295         | 13645        | 1228        | 48045        | 268243         | C                                                    | C        | C        | C        | C        | C        | C        | C        | C                 |
| DRB1*01:01:01                                               | 01:01:01               | HLA00664  | 01:01:01G                                     | 5561        | 14228        | 880928         | 10444        | 16253        | 1872        | 30259        | 959545         | C                                                    | C        | C        | C        | C        | C        | C        | C        | C                 |
| DRB1*01:50                                                  | 01:50                  | HLA08604  | 01:01:01G                                     | 0           | 0            | 0              | 2            | 0            | 0           | 0            | 2              |                                                      |          |          |          |          |          |          |          |                   |
| DRB1*01:67                                                  | 01:67                  | HLA12674  | 01:01:01G                                     | 0           | 0            | 6              | 0            | 0            | 0           | 0            | 6              |                                                      |          | WD       |          |          |          |          | WD       | WD                |
| DRB1*01:77                                                  | 01:77                  | HLA15625  | 01:01:01G                                     | 1           | 0            | 44             | 0            | 4            | 2           | 0            | 51             |                                                      |          | WD       |          |          |          |          | WD       | WD                |
| DRB1*01:82                                                  | 01:82                  | HLA17346  | 01:01:01G                                     | 0           | 0            | 7              | 0            | 0            | 0           | 0            | 7              |                                                      |          | WD       |          |          |          |          | WD       | WD                |
| DRB1*01:01:02                                               | 01:01:02               | HLA01598  |                                               | 291         | 0            | 13             | 0            | 8            | 2           | 49           | 363            | C                                                    |          | WD       |          | I        |          | I        | I        | C                 |
| DRB1*01:01:03                                               | 01:01:03               | HLA01869  |                                               | 0           | 0            | 1              | 0            | 0            | 0           | 1            | 2              |                                                      |          |          |          |          |          |          |          |                   |
| DRB1*01:01:04                                               | 01:01:04               | HLA03225  |                                               | 0           | 0            | 10             | 0            | 0            | 0           | 1            | 11             |                                                      |          | WD       |          |          |          |          | WD       | WD                |
| DRB1*01:01:05                                               | 01:01:05               | HLA03373  |                                               | 0           | 0            | 10             | 0            | 41           | 3           | 3            | 57             |                                                      |          | WD       |          | I        |          |          | WD       | I                 |
| DRB1*01:01:06                                               | 01:01:06               | HLA03389  |                                               | 0           | 0            | 35             | 0            | 0            | 0           | 0            | 35             |                                                      |          | WD       |          |          |          |          | WD       | WD                |
| DRB1*01:01:07                                               | 01:01:07               | HLA03390  |                                               | 0           | 0            | 110            | 0            | 0            | 0           | 2            | 112            |                                                      |          | WD       |          |          |          |          | WD       | WD                |
| DRB1*01:01:08                                               | 01:01:08               | HLA03428  |                                               | 0           | 0            | 44             | 0            | 0            | 0           | 12           | 56             |                                                      |          | WD       |          |          |          | WD       | WD       | WD                |
| DRB1*01:01:09                                               | 01:01:09               | HLA03448  |                                               | 0           | 0            | 2              | 1            | 0            | 0           | 0            | 3              |                                                      |          |          |          |          |          |          |          |                   |
| DRB1*01:01:10                                               | 01:01:10               | HLA03912  |                                               | 0           | 0            | 16             | 0            | 0            | 0           | 0            | 16             |                                                      |          | WD       |          |          |          |          | WD       | WD                |
| DRB1*01:01:11                                               | 01:01:11               | HLA04370  |                                               | 0           | 0            | 1              | 0            | 0            | 0           | 0            | 1              |                                                      |          |          |          |          |          |          |          |                   |
| DRB1*01:01:12                                               | 01:01:12               | HLA04374  |                                               | 0           | 0            | 13             | 0            | 0            | 0           | 1            | 14             |                                                      |          | WD       |          |          |          |          | WD       | WD                |
| DRB1*01:01:13                                               | 01:01:13               | HLA04375  |                                               | 0           | 0            | 1              | 0            | 0            | 0           | 0            | 1              |                                                      |          |          |          |          |          |          |          |                   |
| DRB1*01:01:14                                               | 01:01:14               | HLA04376  |                                               | 0           | 0            | 1              | 0            | 0            | 0           | 1            | 2              |                                                      |          |          |          |          |          |          |          |                   |
| DRB1*01:01:15                                               | 01:01:15               | HLA04385  |                                               | 0           | 4            | 0              | 0            | 0            | 0           | 0            | 4              |                                                      |          |          |          |          |          |          |          |                   |
| DRB1*01:01:16                                               | 01:01:16               | HLA04405  |                                               | 0           | 0            | 5              | 0            | 0            | 0           | 0            | 5              |                                                      |          | WD       |          |          |          |          | WD       | WD                |
| DRB1*01:01:17                                               | 01:01:17               | HLA04613  |                                               | 0           | 10           | 1              | 0            | 0            | 0           | 0            | 11             |                                                      | WD       |          |          |          |          |          | WD       | WD                |
| DRB1*01:01:18                                               | 01:01:18               | HLA04680  |                                               | 0           | 0            | 2              | 0            | 0            | 0           | 0            | 2              |                                                      |          |          |          |          |          |          |          |                   |
| DRB1*01:01:19                                               | 01:01:19               | HLA06502  |                                               | 0           | 0            | 5              | 0            | 0            | 0           | 0            | 5              |                                                      |          | WD       |          |          |          |          | WD       | WD                |
| DRB1*01:01:21                                               | 01:01:21               | HLA07538  |                                               | 0           | 0            | 1              | 0            | 0            | 0           | 0            | 1              |                                                      |          |          |          |          |          |          |          |                   |
| DRB1*01:01:24                                               | 01:01:24               | HLA09217  |                                               | 0           | 0            | 1              | 0            | 0            | 0           | 0            | 1              |                                                      |          |          |          |          |          |          |          |                   |
| DRB1*01:01:25                                               | 01:01:25               | HLA09218  |                                               | 0           | 0            | 3              | 0            | 0            | 1           | 1            | 5              |                                                      |          |          |          |          |          |          | WD       | WD                |

| Supplemental Table 11: HLA-DRB1 Allele Summary <sup>a</sup> |                        |           | Allele Count by Population Group <sup>b</sup> |              |             |               |             |              |             |              |               | 3.0.0 CIWD Category by Population Group <sup>c</sup> |          |           |          |          |          |          |           |                   |
|-------------------------------------------------------------|------------------------|-----------|-----------------------------------------------|--------------|-------------|---------------|-------------|--------------|-------------|--------------|---------------|------------------------------------------------------|----------|-----------|----------|----------|----------|----------|-----------|-------------------|
| Allele                                                      | Genomic Typing         | Allele ID | G group                                       | AFA          | API         | EURO          | MENA        | HIS          | NAM         | UNK          | Total         | AFA                                                  | API      | EURO      | MENA     | HIS      | NAM      | UNK      | Total     | Highest Frequency |
| DRB1*01:01:27                                               | 01:01:27               | HLA11690  |                                               | 0            | 0           | 1             | 0           | 0            | 0           | 0            | 1             |                                                      |          |           |          |          |          |          |           |                   |
| DRB1*01:01:28                                               | 01:01:28               | HLA11904  |                                               | 0            | 0           | 1             | 0           | 0            | 0           | 0            | 1             |                                                      |          |           |          |          |          |          |           |                   |
| DRB1*01:01:29                                               | 01:01:29               | HLA13291  |                                               | 0            | 0           | 2             | 0           | 0            | 0           | 0            | 2             |                                                      |          |           |          |          |          |          |           |                   |
| <b>DRB1*01:02 total</b>                                     | <b>01:02 total</b>     |           |                                               | <b>15957</b> | <b>2013</b> | <b>136773</b> | <b>9500</b> | <b>21967</b> | <b>1672</b> | <b>30244</b> | <b>218126</b> | <b>C</b>                                             | <b>C</b> | <b>C</b>  | <b>C</b> | <b>C</b> | <b>C</b> | <b>C</b> | <b>C</b>  | <b>C</b>          |
| DRB1*01:02                                                  | 01:02                  |           |                                               | 1232         | 59          | 8027          | 465         | 2756         | 122         | 1649         | 14310         | C                                                    | I        | C         | C        | C        | C        | C        | C         | C                 |
| DRB1*01:02P                                                 | 01:02P                 |           |                                               | 0            | 0           | 135           | 0           | 2            | 0           | 0            | 137           |                                                      |          | I         |          |          |          |          | WD        | I                 |
| <b>DRB1*01:02:01G total</b>                                 | <b>01:02:01G total</b> |           |                                               | <b>14724</b> | <b>1899</b> | <b>128567</b> | <b>9035</b> | <b>19205</b> | <b>1550</b> | <b>28589</b> | <b>203569</b> | <b>C</b>                                             | <b>C</b> | <b>C</b>  | <b>C</b> | <b>C</b> | <b>C</b> | <b>C</b> | <b>C</b>  | <b>C</b>          |
| DRB1*01:02:01G                                              | 01:02:01G              |           | 01:02:01G                                     | 181          | 80          | 5688          | 231         | 195          | 2           | 204          | 6581          | C                                                    | I        | C         | C        | C        |          | C        | C         | C                 |
| DRB1*01:02:01                                               | 01:02:01               | HLA00665  | 01:02:01G                                     | 14543        | 1819        | 122879        | 8804        | 19010        | 1548        | 28385        | 196988        | C                                                    | C        | C         | C        | C        | C        | C        | C         | C                 |
| DRB1*01:02:02                                               | 01:02:02               | HLA00666  |                                               | 0            | 0           | 2             | 0           | 0            | 0           | 0            | 2             |                                                      |          |           |          |          |          |          |           |                   |
| DRB1*01:02:03                                               | 01:02:03               | HLA01875  |                                               | 0            | 0           | 33            | 0           | 1            | 0           | 5            | 39            |                                                      |          | WD        |          |          |          |          | WD        | WD                |
| DRB1*01:02:04                                               | 01:02:04               | HLA02001  |                                               | 0            | 0           | 1             | 0           | 2            | 0           | 0            | 3             |                                                      |          |           |          |          |          |          |           |                   |
| DRB1*01:02:06                                               | 01:02:06               | HLA07152  |                                               | 0            | 55          | 8             | 0           | 1            | 0           | 1            | 65            |                                                      | I        | WD        |          |          |          |          | WD        | I                 |
| DRB1*01:02:11                                               | 01:02:11               | HLA13599  |                                               | 1            | 0           | 0             | 0           | 0            | 0           | 0            | 1             |                                                      |          |           |          |          |          |          |           |                   |
| <b>DRB1*01:03 total</b>                                     | <b>01:03 total</b>     |           |                                               | <b>908</b>   | <b>185</b>  | <b>66397</b>  | <b>227</b>  | <b>5344</b>  | <b>427</b>  | <b>9638</b>  | <b>83126</b>  | <b>C</b>                                             | <b>C</b> | <b>C</b>  | <b>C</b> | <b>C</b> | <b>C</b> | <b>C</b> | <b>C</b>  | <b>C</b>          |
| DRB1*01:03                                                  | 01:03                  |           |                                               | 895          | 177         | 63464         | 219         | 5227         | 418         | 9301         | 79701         | C                                                    | C        | C         | C        | C        | C        | C        | C         | C                 |
| DRB1*01:03P                                                 | 01:03P                 |           |                                               | 0            | 0           | 8             | 0           | 2            | 0           | 0            | 10            |                                                      |          | WD        |          |          |          |          | WD        | WD                |
| DRB1*01:03:01                                               | 01:03:01               | HLA00667  |                                               | 13           | 8           | 2925          | 8           | 115          | 9           | 337          | 3415          | WD                                                   | WD       | C         | WD       | C        | C        | C        | C         | C                 |
| DRB1*01:04                                                  | 01:04                  | HLA00668  |                                               | 1            | 0           | 3             | 0           | 1            | 0           | 3            | 8             |                                                      |          |           |          |          |          |          | WD        | WD                |
| DRB1*01:07                                                  | 01:07                  | HLA01307  |                                               | 0            | 0           | 462           | 0           | 0            | 1           | 7            | 470           |                                                      |          | I         |          |          |          |          | WD        | I                 |
| DRB1*01:09                                                  | 01:09                  | HLA01633  |                                               | 0            | 0           | 3             | 0           | 0            | 0           | 0            | 3             |                                                      |          |           |          |          |          |          |           |                   |
| DRB1*01:10                                                  | 01:10                  | HLA01671  |                                               | 0            | 0           | 11            | 0           | 0            | 0           | 0            | 11            |                                                      |          | WD        |          |          |          |          | WD        | WD                |
| <b>DRB1*01:11 total</b>                                     | <b>01:11 total</b>     |           |                                               | <b>3</b>     | <b>0</b>    | <b>18</b>     | <b>0</b>    | <b>1</b>     | <b>0</b>    | <b>2</b>     | <b>24</b>     |                                                      |          | <b>WD</b> |          |          |          |          | <b>WD</b> | <b>WD</b>         |
| DRB1*01:11                                                  | 01:11                  |           |                                               | 1            | 0           | 7             | 0           | 0            | 0           | 0            | 8             |                                                      |          | WD        |          |          |          |          | WD        | WD                |
| DRB1*01:11:01                                               | 01:11:01               | HLA01811  |                                               | 2            | 0           | 9             | 0           | 1            | 0           | 2            | 14            |                                                      |          | WD        |          |          |          |          | WD        | WD                |
| DRB1*01:11:02                                               | 01:11:02               | HLA10322  |                                               | 0            | 0           | 2             | 0           | 0            | 0           | 0            | 2             |                                                      |          |           |          |          |          |          |           |                   |
| DRB1*01:14                                                  | 01:14                  | HLA02494  |                                               | 0            | 2           | 0             | 1           | 0            | 0           | 0            | 3             |                                                      |          |           |          |          |          |          |           |                   |
| DRB1*01:15                                                  | 01:15                  | HLA02500  |                                               | 0            | 0           | 1             | 0           | 1            | 0           | 1            | 3             |                                                      |          |           |          |          |          |          |           |                   |
| DRB1*01:16                                                  | 01:16                  | HLA02666  |                                               | 0            | 0           | 6             | 0           | 0            | 0           | 0            | 6             |                                                      |          | WD        |          |          |          |          | WD        | WD                |
| DRB1*01:17                                                  | 01:17                  | HLA03037  |                                               | 0            | 0           | 1             | 0           | 0            | 0           | 0            | 1             |                                                      |          |           |          |          |          |          |           |                   |
| <b>DRB1*01:18 total</b>                                     | <b>01:18 total</b>     |           |                                               | <b>0</b>     | <b>0</b>    | <b>17</b>     | <b>0</b>    | <b>0</b>     | <b>0</b>    | <b>0</b>     | <b>17</b>     |                                                      |          | <b>WD</b> |          |          |          |          | <b>WD</b> | <b>WD</b>         |

| Supplemental Table 11: HLA-DRB1 Allele Summary <sup>a</sup> |                    |           | Allele Count by Population Group <sup>b</sup> |          |          |           |          |          |          |          |           | 3.0.0 CIWD Category by Population Group <sup>c</sup> |     |           |      |     |     |     |           |                   |
|-------------------------------------------------------------|--------------------|-----------|-----------------------------------------------|----------|----------|-----------|----------|----------|----------|----------|-----------|------------------------------------------------------|-----|-----------|------|-----|-----|-----|-----------|-------------------|
| Allele                                                      | Genomic Typing     | Allele ID | G group                                       | AFA      | API      | EURO      | MENA     | HIS      | NAM      | UNK      | Total     | AFA                                                  | API | EURO      | MENA | HIS | NAM | UNK | Total     | Highest Frequency |
| DRB1*01:18                                                  | 01:18              |           |                                               | 0        | 0        | 15        | 0        | 0        | 0        | 0        | 15        |                                                      |     | WD        |      |     |     |     | WD        | WD                |
| DRB1*01:18:01                                               | 01:18:01           | HLA03038  |                                               | 0        | 0        | 1         | 0        | 0        | 0        | 0        | 1         |                                                      |     |           |      |     |     |     |           |                   |
| DRB1*01:18:02                                               | 01:18:02           | HLA16585  |                                               | 0        | 0        | 1         | 0        | 0        | 0        | 0        | 1         |                                                      |     |           |      |     |     |     |           |                   |
| DRB1*01:19                                                  | 01:19              | HLA03040  |                                               | 0        | 1        | 0         | 0        | 0        | 0        | 0        | 1         |                                                      |     |           |      |     |     |     |           |                   |
| <b>DRB1*01:20 total</b>                                     | <b>01:20 total</b> |           |                                               | <b>0</b> | <b>2</b> | <b>20</b> | <b>0</b> | <b>0</b> | <b>0</b> | <b>2</b> | <b>24</b> |                                                      |     | <b>WD</b> |      |     |     |     | <b>WD</b> | <b>WD</b>         |
| DRB1*01:20                                                  | 01:20              |           |                                               | 0        | 0        | 9         | 0        | 0        | 0        | 1        | 10        |                                                      |     | WD        |      |     |     |     | WD        | WD                |
| DRB1*01:20:01                                               | 01:20:01           | HLA03377  |                                               | 0        | 2        | 11        | 0        | 0        | 0        | 1        | 14        |                                                      |     | WD        |      |     |     |     | WD        | WD                |
| DRB1*01:22                                                  | 01:22              | HLA03837  |                                               | 0        | 0        | 15        | 0        | 0        | 0        | 0        | 15        |                                                      |     | WD        |      |     |     |     | WD        | WD                |
| DRB1*01:23                                                  | 01:23              | HLA04037  |                                               | 3        | 0        | 0         | 0        | 0        | 0        | 0        | 3         |                                                      |     |           |      |     |     |     |           |                   |
| <b>DRB1*01:24 total</b>                                     | <b>01:24 total</b> |           |                                               | <b>0</b> | <b>0</b> | <b>14</b> | <b>0</b> | <b>0</b> | <b>0</b> | <b>0</b> | <b>14</b> |                                                      |     | <b>WD</b> |      |     |     |     | <b>WD</b> | <b>WD</b>         |
| DRB1*01:24                                                  | 01:24              |           |                                               | 0        | 0        | 4         | 0        | 0        | 0        | 0        | 4         |                                                      |     |           |      |     |     |     |           |                   |
| DRB1*01:24:01                                               | 01:24:01           | HLA04371  |                                               | 0        | 0        | 4         | 0        | 0        | 0        | 0        | 4         |                                                      |     |           |      |     |     |     |           |                   |
| DRB1*01:24:02                                               | 01:24:02           | HLA08318  |                                               | 0        | 0        | 6         | 0        | 0        | 0        | 0        | 6         |                                                      |     | WD        |      |     |     |     | WD        | WD                |
| DRB1*01:26                                                  | 01:26              | HLA04373  |                                               | 11       | 0        | 1         | 0        | 0        | 0        | 0        | 12        | WD                                                   |     |           |      |     |     |     | WD        | WD                |
| DRB1*01:27                                                  | 01:27              | HLA04377  |                                               | 0        | 0        | 6         | 0        | 0        | 0        | 0        | 6         |                                                      |     | WD        |      |     |     |     | WD        | WD                |
| DRB1*01:28                                                  | 01:28              | HLA04378  |                                               | 0        | 0        | 1         | 0        | 0        | 0        | 0        | 1         |                                                      |     |           |      |     |     |     |           |                   |
| <b>DRB1*01:29 total</b>                                     | <b>01:29 total</b> |           |                                               | <b>0</b> | <b>0</b> | <b>5</b>  | <b>0</b> | <b>0</b> | <b>0</b> | <b>0</b> | <b>5</b>  |                                                      |     | <b>WD</b> |      |     |     |     | <b>WD</b> | <b>WD</b>         |
| DRB1*01:29:01                                               | 01:29:01           | HLA04379  |                                               | 0        | 0        | 3         | 0        | 0        | 0        | 0        | 3         |                                                      |     |           |      |     |     |     |           |                   |
| DRB1*01:29:02                                               | 01:29:02           | HLA09657  |                                               | 0        | 0        | 2         | 0        | 0        | 0        | 0        | 2         |                                                      |     |           |      |     |     |     |           |                   |
| DRB1*01:30                                                  | 01:30              | HLA04380  |                                               | 0        | 0        | 1         | 0        | 0        | 0        | 0        | 1         |                                                      |     |           |      |     |     |     |           |                   |
| DRB1*01:32                                                  | 01:32              | HLA04783  |                                               | 0        | 0        | 2         | 0        | 0        | 0        | 0        | 2         |                                                      |     |           |      |     |     |     |           |                   |
| DRB1*01:40N                                                 | 01:40N             | HLA07266  |                                               | 0        | 0        | 1         | 0        | 0        | 0        | 0        | 1         |                                                      |     |           |      |     |     |     |           |                   |
| DRB1*01:43                                                  | 01:43              | HLA07270  |                                               | 0        | 0        | 1         | 0        | 0        | 0        | 0        | 1         |                                                      |     |           |      |     |     |     |           |                   |
| <b>DRB1*01:44 total</b>                                     | <b>01:44 total</b> |           |                                               | <b>0</b> | <b>0</b> | <b>3</b>  | <b>0</b> | <b>0</b> | <b>0</b> | <b>0</b> | <b>3</b>  |                                                      |     |           |      |     |     |     |           |                   |
| DRB1*01:44                                                  | 01:44              |           |                                               | 0        | 0        | 3         | 0        | 0        | 0        | 0        | 3         |                                                      |     |           |      |     |     |     |           |                   |
| DRB1*01:46                                                  | 01:46              | HLA08313  |                                               | 0        | 0        | 0         | 0        | 0        | 0        | 3        | 3         |                                                      |     |           |      |     |     |     |           |                   |
| DRB1*01:54                                                  | 01:54              | HLA08886  |                                               | 0        | 0        | 0         | 0        | 1        | 0        | 0        | 1         |                                                      |     |           |      |     |     |     |           |                   |
| DRB1*01:57                                                  | 01:57              | HLA09168  |                                               | 0        | 0        | 1         | 0        | 0        | 0        | 0        | 1         |                                                      |     |           |      |     |     |     |           |                   |
| DRB1*01:58                                                  | 01:58              | HLA09219  |                                               | 0        | 0        | 1         | 0        | 0        | 0        | 0        | 1         |                                                      |     |           |      |     |     |     |           |                   |
| DRB1*01:59                                                  | 01:59              | HLA09766  |                                               | 0        | 0        | 2         | 0        | 0        | 0        | 0        | 2         |                                                      |     |           |      |     |     |     |           |                   |
| DRB1*01:68N                                                 | 01:68N             | HLA13293  |                                               | 0        | 0        | 1         | 0        | 0        | 0        | 0        | 1         |                                                      |     |           |      |     |     |     |           |                   |

| Supplemental Table 11: HLA-DRB1 Allele Summary <sup>a</sup> |                        |           | Allele Count by Population Group <sup>b</sup> |              |              |                |              |              |             |               |                | 3.0.0 CIWD Category by Population Group <sup>c</sup> |          |          |          |          |          |          |          |                   |
|-------------------------------------------------------------|------------------------|-----------|-----------------------------------------------|--------------|--------------|----------------|--------------|--------------|-------------|---------------|----------------|------------------------------------------------------|----------|----------|----------|----------|----------|----------|----------|-------------------|
| Allele                                                      | Genomic Typing         | Allele ID | G group                                       | AFA          | API          | EURO           | MENA         | HIS          | NAM         | UNK           | Total          | AFA                                                  | API      | EURO     | MENA     | HIS      | NAM      | UNK      | Total    | Highest Frequency |
| DRB1*01:72                                                  | 01:72                  | HLA14189  |                                               | 0            | 0            | 1              | 0            | 0            | 0           | 0             | 1              |                                                      |          |          |          |          |          |          |          |                   |
| DRB1*01:78                                                  | 01:78                  | HLA16002  |                                               | 0            | 0            | 1              | 0            | 0            | 0           | 0             | 1              |                                                      |          |          |          |          |          |          |          |                   |
| DRB1*01:79                                                  | 01:79                  | HLA16966  |                                               | 0            | 0            | 1              | 0            | 0            | 0           | 0             | 1              |                                                      |          |          |          |          |          |          |          |                   |
| DRB1*01:80                                                  | 01:80                  | HLA16967  |                                               | 0            | 1            | 0              | 0            | 0            | 0           | 0             | 1              |                                                      |          |          |          |          |          |          |          |                   |
| DRB1*01:CODE <sup>d</sup>                                   | 01:CODE                |           |                                               | 977          | 226          | 25407          | 332          | 2846         | 131         | 2119          | 32038          | NA                                                   | NA       | NA       | NA       | NA       | NA       | NA       | NA       | NA                |
| <b>DRB1*03:01 total</b>                                     | <b>03:01 total</b>     |           |                                               | <b>25025</b> | <b>78186</b> | <b>1259298</b> | <b>36467</b> | <b>45511</b> | <b>4489</b> | <b>117681</b> | <b>1566657</b> | <b>C</b>                                             | <b>C</b> | <b>C</b> | <b>C</b> | <b>C</b> | <b>C</b> | <b>C</b> | <b>C</b> | <b>C</b>          |
| DRB1*03:01                                                  | 03:01                  |           |                                               | 12531        | 10697        | 321883         | 5866         | 20234        | 2609        | 48112         | 421932         | C                                                    | C        | C        | C        | C        | C        | C        | C        | C                 |
| DRB1*03:01P                                                 | 03:01P                 |           |                                               | 2            | 9            | 1187           | 12           | 2            | 0           | 2             | 1214           |                                                      | WD       | I        | WD       |          |          |          | I        | I                 |
| <b>DRB1*03:01:01G total</b>                                 | <b>03:01:01G total</b> |           |                                               | <b>12462</b> | <b>67438</b> | <b>935810</b>  | <b>30498</b> | <b>25258</b> | <b>1880</b> | <b>69521</b>  | <b>1142867</b> | <b>C</b>                                             | <b>C</b> | <b>C</b> | <b>C</b> | <b>C</b> | <b>C</b> | <b>C</b> | <b>C</b> | <b>C</b>          |
| DRB1*03:01:01G                                              | 03:01:01G              |           | 03:01:01G                                     | 1412         | 42766        | 47727          | 10886        | 6818         | 193         | 40174         | 149976         | C                                                    | C        | C        | C        | C        | C        | C        | C        | C                 |
| DRB1*03:01:01                                               | 03:01:01               |           | 03:01:01G                                     | 10871        | 24639        | 880752         | 19521        | 17551        | 1610        | 28600         | 983544         | C                                                    | C        | C        | C        | C        | C        | C        | C        | C                 |
| DRB1*03:01:01:01                                            | 03:01:01:01            | HLA00671  | 03:01:01G                                     | 127          | 20           | 6427           | 68           | 644          | 62          | 678           | 8026           | C                                                    | I        | C        | C        | C        | C        | C        | C        | C                 |
| DRB1*03:01:01:02                                            | 03:01:01:02            | HLA03483  | 03:01:01G                                     | 35           | 3            | 373            | 6            | 189          | 13          | 47            | 666            | WD                                                   |          | I        | WD       | C        | C        | I        | I        | C                 |
| DRB1*03:01:08                                               | 03:01:08               | HLA04577  | 03:01:01G                                     | 17           | 8            | 362            | 12           | 4            | 1           | 7             | 411            | WD                                                   | WD       | I        | WD       |          |          | WD       | I        | I                 |
| DRB1*03:01:26                                               | 03:01:26               | HLA16848  | 03:01:01G                                     | 0            | 0            | 6              | 2            | 0            | 0           | 0             | 8              |                                                      |          | WD       |          |          |          |          | WD       | WD                |
| DRB1*03:124                                                 | 03:124                 | HLA13762  | 03:01:01G                                     | 0            | 2            | 57             | 1            | 52           | 1           | 15            | 128            |                                                      |          | WD       |          | I        |          | I        | WD       | I                 |
| DRB1*03:132                                                 | 03:132                 | HLA15154  | 03:01:01G                                     | 0            | 0            | 99             | 2            | 0            | 0           | 0             | 101            |                                                      |          | WD       |          |          |          |          | WD       | WD                |
| DRB1*03:137                                                 | 03:137                 | HLA15597  | 03:01:01G                                     | 0            | 0            | 7              | 0            | 0            | 0           | 0             | 7              |                                                      |          | WD       |          |          |          |          | WD       | WD                |
| DRB1*03:01:02                                               | 03:01:02               | HLA00672  |                                               | 30           | 36           | 348            | 80           | 11           | 0           | 33            | 538            | WD                                                   | I        | I        | C        | I        |          | I        | I        | C                 |
| DRB1*03:01:03                                               | 03:01:03               | HLA02769  |                                               | 0            | 0            | 1              | 0            | 0            | 0           | 0             | 1              |                                                      |          |          |          |          |          |          |          |                   |
| DRB1*03:01:04                                               | 03:01:04               | HLA02830  |                                               | 0            | 1            | 3              | 1            | 1            | 0           | 2             | 8              |                                                      |          |          |          |          |          |          | WD       | WD                |
| DRB1*03:01:05                                               | 03:01:05               | HLA02955  |                                               | 0            | 0            | 0              | 0            | 5            | 0           | 0             | 5              |                                                      |          |          |          | WD       |          |          | WD       | WD                |
| DRB1*03:01:07                                               | 03:01:07               | HLA03855  |                                               | 0            | 0            | 13             | 3            | 0            | 0           | 0             | 16             |                                                      |          | WD       |          |          |          |          | WD       | WD                |
| DRB1*03:01:10                                               | 03:01:10               | HLA05969  |                                               | 0            | 0            | 1              | 0            | 0            | 0           | 0             | 1              |                                                      |          |          |          |          |          |          |          |                   |
| DRB1*03:01:11                                               | 03:01:11               | HLA05992  |                                               | 0            | 0            | 3              | 0            | 0            | 0           | 0             | 3              |                                                      |          |          |          |          |          |          |          |                   |
| DRB1*03:01:12                                               | 03:01:12               | HLA06477  |                                               | 0            | 1            | 18             | 0            | 0            | 0           | 0             | 19             |                                                      |          | WD       |          |          |          |          | WD       | WD                |
| DRB1*03:01:13                                               | 03:01:13               | HLA06508  |                                               | 0            | 1            | 0              | 0            | 0            | 0           | 0             | 1              |                                                      |          |          |          |          |          |          |          |                   |
| DRB1*03:01:14                                               | 03:01:14               | HLA06770  |                                               | 0            | 0            | 12             | 0            | 0            | 0           | 0             | 12             |                                                      |          | WD       |          |          |          |          | WD       | WD                |
| DRB1*03:01:15                                               | 03:01:15               | HLA07149  |                                               | 0            | 0            | 11             | 0            | 0            | 0           | 10            | 21             |                                                      |          | WD       |          |          |          | WD       | WD       | WD                |
| DRB1*03:01:16                                               | 03:01:16               | HLA07155  |                                               | 0            | 0            | 0              | 3            | 0            | 0           | 0             | 3              |                                                      |          |          |          |          |          |          |          |                   |
| DRB1*03:01:17                                               | 03:01:17               | HLA07158  |                                               | 0            | 0            | 5              | 0            | 0            | 0           | 0             | 5              |                                                      |          | WD       |          |          |          |          | WD       | WD                |

| Supplemental Table 11: HLA-DRB1 Allele Summary <sup>a</sup> |                    |           | Allele Count by Population Group <sup>b</sup> |              |            |             |             |             |             |             |              | 3.0.0 CIWD Category by Population Group <sup>c</sup> |           |           |          |          |          |           |           |                   |
|-------------------------------------------------------------|--------------------|-----------|-----------------------------------------------|--------------|------------|-------------|-------------|-------------|-------------|-------------|--------------|------------------------------------------------------|-----------|-----------|----------|----------|----------|-----------|-----------|-------------------|
| Allele                                                      | Genomic Typing     | Allele ID | G group                                       | AFA          | API        | EURO        | MENA        | HIS         | NAM         | UNK         | Total        | AFA                                                  | API       | EURO      | MENA     | HIS      | NAM      | UNK       | Total     | Highest Frequency |
| DRB1*03:01:18                                               | 03:01:18           | HLA07159  |                                               | 0            | 0          | 1           | 0           | 0           | 0           | 0           | 1            |                                                      |           |           |          |          |          |           |           |                   |
| DRB1*03:01:20                                               | 03:01:20           | HLA07872  |                                               | 0            | 1          | 1           | 4           | 0           | 0           | 0           | 6            |                                                      |           |           |          |          |          |           | WD        | WD                |
| DRB1*03:01:21                                               | 03:01:21           | HLA09062  |                                               | 0            | 0          | 0           | 0           | 0           | 0           | 1           | 1            |                                                      |           |           |          |          |          |           |           |                   |
| DRB1*03:01:25                                               | 03:01:25           | HLA13281  |                                               | 0            | 2          | 1           | 0           | 0           | 0           | 0           | 3            |                                                      |           |           |          |          |          |           |           |                   |
| <b>DRB1*03:02 total</b>                                     | <b>03:02 total</b> |           |                                               | <b>22752</b> | <b>167</b> | <b>2909</b> | <b>1331</b> | <b>6128</b> | <b>1236</b> | <b>6224</b> | <b>40747</b> | <b>C</b>                                             | <b>C</b>  | <b>C</b>  | <b>C</b> | <b>C</b> | <b>C</b> | <b>C</b>  | <b>C</b>  | <b>C</b>          |
| DRB1*03:02                                                  | 03:02              |           |                                               | 2515         | 8          | 269         | 37          | 864         | 101         | 613         | 4407         | C                                                    | WD        | I         | WD       | C        | C        | C         | C         | C                 |
| DRB1*03:02P                                                 | 03:02P             |           |                                               | 0            | 0          | 7           | 0           | 0           | 0           | 0           | 7            |                                                      |           | WD        |          |          |          |           | WD        | WD                |
| DRB1*03:02:01                                               | 03:02:01           | HLA00673  |                                               | 20226        | 159        | 2617        | 1294        | 5112        | 1130        | 5569        | 36107        | C                                                    | C         | C         | C        | C        | C        | C         | C         | C                 |
| DRB1*03:02:02                                               | 03:02:02           | HLA00674  |                                               | 11           | 0          | 16          | 0           | 152         | 5           | 42          | 226          | WD                                                   |           | WD        |          | C        | WD       | I         | I         | C                 |
| DRB1*03:03                                                  | 03:03              | HLA00675  |                                               | 24           | 0          | 1           | 0           | 0           | 2           | 8           | 35           | WD                                                   |           |           |          |          |          | WD        | WD        | WD                |
| <b>DRB1*03:04 total</b>                                     | <b>03:04 total</b> |           |                                               | <b>4</b>     | <b>11</b>  | <b>2038</b> | <b>4</b>    | <b>34</b>   | <b>1</b>    | <b>73</b>   | <b>2165</b>  |                                                      | <b>WD</b> | <b>C</b>  |          | <b>I</b> |          | <b>I</b>  | <b>C</b>  | <b>C</b>          |
| DRB1*03:04                                                  | 03:04              |           |                                               | 0            | 0          | 141         | 0           | 4           | 0           | 6           | 151          |                                                      |           | I         |          |          |          | WD        | WD        | I                 |
| DRB1*03:04:01                                               | 03:04:01           | HLA00676  |                                               | 4            | 11         | 1897        | 4           | 30          | 1           | 66          | 2013         |                                                      | WD        | C         |          | I        |          | I         | C         | C                 |
| DRB1*03:04:02                                               | 03:04:02           | HLA06509  |                                               | 0            | 0          | 0           | 0           | 0           | 0           | 1           | 1            |                                                      |           |           |          |          |          |           |           |                   |
| <b>DRB1*03:05 total</b>                                     | <b>03:05 total</b> |           |                                               | <b>7</b>     | <b>19</b>  | <b>257</b>  | <b>3</b>    | <b>4</b>    | <b>2</b>    | <b>27</b>   | <b>319</b>   | <b>WD</b>                                            | <b>I</b>  | <b>I</b>  |          |          |          | <b>I</b>  | <b>I</b>  | <b>I</b>          |
| DRB1*03:05                                                  | 03:05              |           |                                               | 1            | 0          | 26          | 0           | 2           | 1           | 1           | 31           |                                                      |           | WD        |          |          |          |           | WD        | WD                |
| DRB1*03:05:01                                               | 03:05:01           | HLA00677  |                                               | 5            | 18         | 194         | 3           | 1           | 1           | 24          | 246          | WD                                                   | I         | I         |          |          |          | I         | I         | I                 |
| DRB1*03:05:02                                               | 03:05:02           | HLA01428  |                                               | 1            | 0          | 29          | 0           | 1           | 0           | 2           | 33           |                                                      |           | WD        |          |          |          |           | WD        | WD                |
| DRB1*03:05:03                                               | 03:05:03           | HLA03765  |                                               | 0            | 1          | 8           | 0           | 0           | 0           | 0           | 9            |                                                      |           | WD        |          |          |          |           | WD        | WD                |
| DRB1*03:06                                                  | 03:06              | HLA00678  |                                               | 5            | 20         | 153         | 3           | 0           | 0           | 13          | 194          | WD                                                   | I         | I         |          |          |          | WD        | I         | I                 |
| DRB1*03:07                                                  | 03:07              | HLA00679  |                                               | 3            | 2          | 60          | 15          | 29          | 2           | 11          | 122          |                                                      |           | WD        | WD       | I        |          | WD        | WD        | I                 |
| DRB1*03:08                                                  | 03:08              | HLA00680  |                                               | 0            | 0          | 7           | 1           | 0           | 0           | 2           | 10           |                                                      |           | WD        |          |          |          |           | WD        | WD                |
| DRB1*03:10                                                  | 03:10              | HLA00682  |                                               | 0            | 2          | 2           | 0           | 0           | 0           | 0           | 4            |                                                      |           |           |          |          |          |           |           |                   |
| <b>DRB1*03:11 total</b>                                     | <b>03:11 total</b> |           |                                               | <b>0</b>     | <b>0</b>   | <b>8</b>    | <b>2</b>    | <b>3</b>    | <b>0</b>    | <b>2</b>    | <b>15</b>    |                                                      |           | <b>WD</b> |          |          |          |           | <b>WD</b> | <b>WD</b>         |
| DRB1*03:11                                                  | 03:11              |           |                                               | 0            | 0          | 1           | 1           | 1           | 0           | 0           | 3            |                                                      |           |           |          |          |          |           |           |                   |
| DRB1*03:11:01                                               | 03:11:01           | HLA00683  |                                               | 0            | 0          | 7           | 1           | 2           | 0           | 2           | 12           |                                                      |           | WD        |          |          |          |           | WD        | WD                |
| DRB1*03:12                                                  | 03:12              | HLA00684  |                                               | 0            | 0          | 1           | 0           | 0           | 0           | 0           | 1            |                                                      |           |           |          |          |          |           |           |                   |
| <b>DRB1*03:13 total</b>                                     | <b>03:13 total</b> |           |                                               | <b>1</b>     | <b>0</b>   | <b>146</b>  | <b>0</b>    | <b>4</b>    | <b>2</b>    | <b>8</b>    | <b>161</b>   |                                                      |           | <b>I</b>  |          |          |          | <b>WD</b> | <b>WD</b> | <b>I</b>          |
| DRB1*03:13                                                  | 03:13              |           |                                               | 0            | 0          | 10          | 0           | 1           | 0           | 1           | 12           |                                                      |           | WD        |          |          |          |           | WD        | WD                |
| DRB1*03:13:01                                               | 03:13:01           | HLA01007  |                                               | 1            | 0          | 125         | 0           | 3           | 2           | 6           | 137          |                                                      |           | I         |          |          |          | WD        | WD        | I                 |
| DRB1*03:13:02                                               | 03:13:02           | HLA03684  |                                               | 0            | 0          | 11          | 0           | 0           | 0           | 1           | 12           |                                                      |           | WD        |          |          |          |           | WD        | WD                |

| Supplemental Table 11: HLA-DRB1 Allele Summary <sup>a</sup> |                    |           | Allele Count by Population Group <sup>b</sup> |          |          |            |          |            |          |           |            | 3.0.0 CIWD Category by Population Group <sup>c</sup> |           |          |      |          |          |          |          |                   |
|-------------------------------------------------------------|--------------------|-----------|-----------------------------------------------|----------|----------|------------|----------|------------|----------|-----------|------------|------------------------------------------------------|-----------|----------|------|----------|----------|----------|----------|-------------------|
| Allele                                                      | Genomic Typing     | Allele ID | G group                                       | AFA      | API      | EURO       | MENA     | HIS        | NAM      | UNK       | Total      | AFA                                                  | API       | EURO     | MENA | HIS      | NAM      | UNK      | Total    | Highest Frequency |
| DRB1*03:14                                                  | 03:14              | HLA01008  |                                               | 0        | 1        | 0          | 0        | 0          | 0        | 1         | 2          |                                                      |           |          |      |          |          |          |          |                   |
| <b>DRB1*03:15 total</b>                                     | <b>03:15 total</b> |           |                                               | <b>8</b> | <b>5</b> | <b>138</b> | <b>4</b> | <b>139</b> | <b>9</b> | <b>26</b> | <b>329</b> | <b>WD</b>                                            | <b>WD</b> | <b>I</b> |      | <b>C</b> | <b>C</b> | <b>I</b> | <b>I</b> | <b>C</b>          |
| DRB1*03:15                                                  | 03:15              |           |                                               | 7        | 3        | 99         | 4        | 107        | 8        | 20        | 248        | WD                                                   |           | WD       |      | C        | C        | I        | I        | C                 |
| DRB1*03:15:01                                               | 03:15:01           | HLA01087  |                                               | 1        | 2        | 39         | 0        | 32         | 1        | 6         | 81         |                                                      |           | WD       |      | I        |          | WD       | WD       | I                 |
| DRB1*03:16                                                  | 03:16              | HLA01152  |                                               | 1        | 0        | 7          | 0        | 14         | 2        | 3         | 27         |                                                      |           | WD       |      | I        |          |          | WD       | I                 |
| DRB1*03:17                                                  | 03:17              | HLA01153  |                                               | 0        | 0        | 6          | 0        | 0          | 0        | 1         | 7          |                                                      |           | WD       |      |          |          |          | WD       | WD                |
| DRB1*03:18                                                  | 03:18              | HLA01349  |                                               | 0        | 0        | 2          | 0        | 0          | 0        | 0         | 2          |                                                      |           |          |      |          |          |          |          |                   |
| DRB1*03:19                                                  | 03:19              | HLA01432  |                                               | 1        | 2        | 17         | 1        | 0          | 0        | 1         | 22         |                                                      |           | WD       |      |          |          |          | WD       | WD                |
| DRB1*03:20                                                  | 03:20              | HLA01455  |                                               | 0        | 0        | 1          | 0        | 0          | 0        | 0         | 1          |                                                      |           |          |      |          |          |          |          |                   |
| DRB1*03:22                                                  | 03:22              | HLA01557  |                                               | 0        | 0        | 9          | 0        | 0          | 0        | 0         | 9          |                                                      |           | WD       |      |          |          |          | WD       | WD                |
| DRB1*03:23                                                  | 03:23              | HLA01614  |                                               | 0        | 1        | 155        | 0        | 0          | 0        | 6         | 162        |                                                      |           | I        |      |          |          | WD       | I        | I                 |
| DRB1*03:24                                                  | 03:24              | HLA01687  |                                               | 0        | 0        | 18         | 0        | 0          | 0        | 0         | 18         |                                                      |           | WD       |      |          |          |          | WD       | WD                |
| DRB1*03:25                                                  | 03:25              | HLA01692  |                                               | 0        | 1        | 5          | 0        | 0          | 0        | 0         | 6          |                                                      |           | WD       |      |          |          |          | WD       | WD                |
| DRB1*03:27                                                  | 03:27              | HLA01930  |                                               | 0        | 4        | 0          | 0        | 0          | 0        | 1         | 5          |                                                      |           |          |      |          |          |          | WD       | WD                |
| DRB1*03:28                                                  | 03:28              | HLA01933  |                                               | 0        | 0        | 1          | 0        | 0          | 0        | 0         | 1          |                                                      |           |          |      |          |          |          |          |                   |
| DRB1*03:29                                                  | 03:29              | HLA02420  |                                               | 6        | 0        | 0          | 0        | 0          | 0        | 0         | 6          | WD                                                   |           |          |      |          |          |          | WD       | WD                |
| DRB1*03:30                                                  | 03:30              | HLA02603  |                                               | 0        | 0        | 6          | 0        | 0          | 0        | 0         | 6          |                                                      |           | WD       |      |          |          |          | WD       | WD                |
| DRB1*03:33                                                  | 03:33              | HLA02870  |                                               | 0        | 1        | 0          | 0        | 0          | 0        | 0         | 1          |                                                      |           |          |      |          |          |          |          |                   |
| DRB1*03:34                                                  | 03:34              | HLA02886  |                                               | 0        | 0        | 3          | 0        | 0          | 0        | 0         | 3          |                                                      |           |          |      |          |          |          |          |                   |
| DRB1*03:36                                                  | 03:36              | HLA02996  |                                               | 0        | 0        | 13         | 0        | 0          | 0        | 0         | 13         |                                                      |           | WD       |      |          |          |          | WD       | WD                |
| DRB1*03:37                                                  | 03:37              | HLA03059  |                                               | 2        | 5        | 47         | 3        | 2          | 0        | 16        | 75         |                                                      | WD        | WD       |      |          |          |          | I        | WD                |
| DRB1*03:39                                                  | 03:39              | HLA03075  |                                               | 1        | 0        | 6          | 0        | 0          | 0        | 1         | 8          |                                                      |           | WD       |      |          |          |          | WD       | WD                |
| <b>DRB1*03:41 total</b>                                     | <b>03:41 total</b> |           |                                               | <b>1</b> | <b>0</b> | <b>0</b>   | <b>0</b> | <b>0</b>   | <b>0</b> | <b>0</b>  | <b>1</b>   |                                                      |           |          |      |          |          |          |          |                   |
| DRB1*03:41                                                  | 03:41              |           |                                               | 1        | 0        | 0          | 0        | 0          | 0        | 0         | 1          |                                                      |           |          |      |          |          |          |          |                   |
| DRB1*03:42                                                  | 03:42              | HLA03749  |                                               | 0        | 0        | 5          | 0        | 0          | 0        | 1         | 6          |                                                      |           | WD       |      |          |          |          | WD       | WD                |
| DRB1*03:43                                                  | 03:43              | HLA03836  |                                               | 0        | 0        | 10         | 0        | 0          | 0        | 0         | 10         |                                                      |           | WD       |      |          |          |          | WD       | WD                |
| DRB1*03:44                                                  | 03:44              | HLA03842  |                                               | 0        | 0        | 14         | 1        | 0          | 0        | 0         | 15         |                                                      |           | WD       |      |          |          |          | WD       | WD                |
| DRB1*03:45                                                  | 03:45              | HLA03843  |                                               | 0        | 0        | 1          | 0        | 0          | 0        | 0         | 1          |                                                      |           |          |      |          |          |          |          |                   |
| DRB1*03:46                                                  | 03:46              | HLA03844  |                                               | 0        | 0        | 1          | 0        | 3          | 0        | 0         | 4          |                                                      |           |          |      |          |          |          |          |                   |
| DRB1*03:47                                                  | 03:47              | HLA03859  |                                               | 0        | 0        | 16         | 0        | 0          | 0        | 0         | 16         |                                                      |           | WD       |      |          |          |          | WD       | WD                |
| DRB1*03:48                                                  | 03:48              | HLA03869  |                                               | 0        | 0        | 3          | 0        | 0          | 0        | 0         | 3          |                                                      |           |          |      |          |          |          |          |                   |

| Supplemental Table 11: HLA-DRB1 Allele Summary <sup>a</sup> |                    |           | Allele Count by Population Group <sup>b</sup> |          |          |          |          |          |          |          |          | 3.0.0 CIWD Category by Population Group <sup>c</sup> |     |      |      |     |     |     |       |                   |
|-------------------------------------------------------------|--------------------|-----------|-----------------------------------------------|----------|----------|----------|----------|----------|----------|----------|----------|------------------------------------------------------|-----|------|------|-----|-----|-----|-------|-------------------|
| Allele                                                      | Genomic Typing     | Allele ID | G group                                       | AFA      | API      | EURO     | MENA     | HIS      | NAM      | UNK      | Total    | AFA                                                  | API | EURO | MENA | HIS | NAM | UNK | Total | Highest Frequency |
| DRB1*03:49                                                  | 03:49              | HLA04355  |                                               | 0        | 0        | 1        | 0        | 0        | 0        | 0        | 1        |                                                      |     |      |      |     |     |     |       |                   |
| DRB1*03:50                                                  | 03:50              | HLA04386  |                                               | 0        | 0        | 1        | 0        | 0        | 0        | 0        | 1        |                                                      |     |      |      |     |     |     |       |                   |
| DRB1*03:51                                                  | 03:51              | HLA04411  |                                               | 0        | 3        | 0        | 0        | 0        | 0        | 0        | 3        |                                                      |     |      |      |     |     |     |       |                   |
| DRB1*03:54                                                  | 03:54              | HLA05132  |                                               | 0        | 0        | 2        | 0        | 0        | 0        | 0        | 2        |                                                      |     |      |      |     |     |     |       |                   |
| DRB1*03:55                                                  | 03:55              | HLA05361  |                                               | 0        | 0        | 1        | 0        | 0        | 0        | 0        | 1        |                                                      |     |      |      |     |     |     |       |                   |
| DRB1*03:58                                                  | 03:58              | HLA05875  |                                               | 0        | 0        | 5        | 0        | 0        | 0        | 3        | 8        |                                                      |     | WD   |      |     |     |     | WD    | WD                |
| DRB1*03:59                                                  | 03:59              | HLA05949  |                                               | 0        | 1        | 0        | 0        | 0        | 0        | 0        | 1        |                                                      |     |      |      |     |     |     |       |                   |
| DRB1*03:60                                                  | 03:60              | HLA06307  |                                               | 0        | 0        | 1        | 0        | 0        | 0        | 0        | 1        |                                                      |     |      |      |     |     |     |       |                   |
| DRB1*03:62                                                  | 03:62              | HLA06494  |                                               | 2        | 0        | 0        | 0        | 0        | 0        | 1        | 3        |                                                      |     |      |      |     |     |     |       |                   |
| DRB1*03:63                                                  | 03:63              | HLA06495  |                                               | 0        | 0        | 1        | 0        | 0        | 0        | 0        | 1        |                                                      |     |      |      |     |     |     |       |                   |
| DRB1*03:65                                                  | 03:65              | HLA06908  |                                               | 0        | 0        | 2        | 1        | 0        | 0        | 0        | 3        |                                                      |     |      |      |     |     |     |       |                   |
| DRB1*03:67N                                                 | 03:67N             | HLA07156  |                                               | 0        | 0        | 2        | 0        | 0        | 0        | 0        | 2        |                                                      |     |      |      |     |     |     |       |                   |
| DRB1*03:68N                                                 | 03:68N             | HLA07157  |                                               | 0        | 0        | 1        | 0        | 0        | 0        | 0        | 1        |                                                      |     |      |      |     |     |     |       |                   |
| DRB1*03:69                                                  | 03:69              | HLA07167  |                                               | 0        | 0        | 5        | 0        | 0        | 0        | 0        | 5        |                                                      |     | WD   |      |     |     |     | WD    | WD                |
| DRB1*03:70                                                  | 03:70              | HLA07169  |                                               | 0        | 0        | 2        | 0        | 0        | 0        | 0        | 2        |                                                      |     |      |      |     |     |     |       |                   |
| <b>DRB1*03:71 total</b>                                     | <b>03:71 total</b> |           |                                               | <b>0</b> | <b>1</b> | <b>0</b> | <b>0</b> | <b>0</b> | <b>0</b> | <b>1</b> | <b>2</b> |                                                      |     |      |      |     |     |     |       |                   |
| DRB1*03:71                                                  | 03:71              |           |                                               | 0        | 1        | 0        | 0        | 0        | 0        | 1        | 2        |                                                      |     |      |      |     |     |     |       |                   |
| DRB1*03:72                                                  | 03:72              | HLA07253  |                                               | 0        | 0        | 3        | 0        | 0        | 0        | 0        | 3        |                                                      |     |      |      |     |     |     |       |                   |
| DRB1*03:73                                                  | 03:73              | HLA07255  |                                               | 0        | 0        | 11       | 0        | 0        | 0        | 1        | 12       |                                                      |     | WD   |      |     |     |     | WD    | WD                |
| DRB1*03:74                                                  | 03:74              | HLA07264  |                                               | 3        | 0        | 0        | 0        | 0        | 0        | 0        | 3        |                                                      |     |      |      |     |     |     |       |                   |
| DRB1*03:75                                                  | 03:75              | HLA07311  |                                               | 0        | 0        | 1        | 0        | 0        | 0        | 0        | 1        |                                                      |     |      |      |     |     |     |       |                   |
| DRB1*03:76                                                  | 03:76              | HLA07322  |                                               | 0        | 0        | 9        | 0        | 0        | 0        | 0        | 9        |                                                      |     | WD   |      |     |     |     | WD    | WD                |
| DRB1*03:79                                                  | 03:79              | HLA07508  |                                               | 1        | 2        | 1        | 0        | 0        | 0        | 0        | 4        |                                                      |     |      |      |     |     |     |       |                   |
| DRB1*03:81                                                  | 03:81              | HLA04406  |                                               | 0        | 0        | 1        | 0        | 0        | 0        | 0        | 1        |                                                      |     |      |      |     |     |     |       |                   |
| DRB1*03:84                                                  | 03:84              | HLA08244  |                                               | 0        | 0        | 8        | 0        | 0        | 0        | 0        | 8        |                                                      |     | WD   |      |     |     |     | WD    | WD                |
| DRB1*03:87                                                  | 03:87              | HLA08854  |                                               | 0        | 0        | 3        | 0        | 0        | 0        | 0        | 3        |                                                      |     |      |      |     |     |     |       |                   |
| DRB1*03:88                                                  | 03:88              | HLA08875  |                                               | 1        | 0        | 0        | 0        | 0        | 0        | 1        | 2        |                                                      |     |      |      |     |     |     |       |                   |
| DRB1*03:89                                                  | 03:89              | HLA09063  |                                               | 0        | 0        | 2        | 0        | 0        | 0        | 0        | 2        |                                                      |     |      |      |     |     |     |       |                   |
| DRB1*03:90                                                  | 03:90              | HLA09214  |                                               | 1        | 0        | 2        | 0        | 0        | 1        | 0        | 4        |                                                      |     |      |      |     |     |     |       |                   |
| DRB1*03:92                                                  | 03:92              | HLA09759  |                                               | 0        | 0        | 2        | 0        | 0        | 0        | 0        | 2        |                                                      |     |      |      |     |     |     |       |                   |
| DRB1*03:93                                                  | 03:93              | HLA09761  |                                               | 0        | 0        | 7        | 0        | 0        | 0        | 0        | 7        |                                                      |     | WD   |      |     |     |     | WD    | WD                |

| Supplemental Table 11: HLA-DRB1 Allele Summary <sup>a</sup> |                        |           | Allele Count by Population Group <sup>b</sup> |             |              |               |             |              |             |              |               | 3.0.0 CIWD Category by Population Group <sup>c</sup> |          |           |          |          |          |          |           |                   |
|-------------------------------------------------------------|------------------------|-----------|-----------------------------------------------|-------------|--------------|---------------|-------------|--------------|-------------|--------------|---------------|------------------------------------------------------|----------|-----------|----------|----------|----------|----------|-----------|-------------------|
| Allele                                                      | Genomic Typing         | Allele ID | G group                                       | AFA         | API          | EURO          | MENA        | HIS          | NAM         | UNK          | Total         | AFA                                                  | API      | EURO      | MENA     | HIS      | NAM      | UNK      | Total     | Highest Frequency |
| DRB1*03:95                                                  | 03:95                  | HLA10911  |                                               | 0           | 0            | 1             | 0           | 0            | 0           | 0            | 1             |                                                      |          |           |          |          |          |          |           |                   |
| DRB1*03:96                                                  | 03:96                  | HLA11061  |                                               | 0           | 0            | 2             | 0           | 0            | 0           | 0            | 2             |                                                      |          |           |          |          |          |          |           |                   |
| DRB1*03:99                                                  | 03:99                  | HLA11166  |                                               | 0           | 1            | 0             | 0           | 0            | 0           | 0            | 1             |                                                      |          |           |          |          |          |          |           |                   |
| <b>DRB1*03:100 total</b>                                    | <b>03:100 total</b>    |           |                                               | <b>0</b>    | <b>0</b>     | <b>5</b>      | <b>0</b>    | <b>0</b>     | <b>0</b>    | <b>0</b>     | <b>5</b>      |                                                      |          | <b>WD</b> |          |          |          |          | <b>WD</b> | <b>WD</b>         |
| DRB1*03:100:01                                              | 03:100:01              | HLA11167  |                                               | 0           | 0            | 1             | 0           | 0            | 0           | 0            | 1             |                                                      |          |           |          |          |          |          |           |                   |
| DRB1*03:100:02                                              | 03:100:02              | HLA11376  |                                               | 0           | 0            | 4             | 0           | 0            | 0           | 0            | 4             |                                                      |          |           |          |          |          |          |           |                   |
| DRB1*03:101                                                 | 03:101                 | HLA11175  |                                               | 0           | 1            | 0             | 0           | 0            | 0           | 0            | 1             |                                                      |          |           |          |          |          |          |           |                   |
| DRB1*03:103                                                 | 03:103                 | HLA11178  |                                               | 1           | 0            | 0             | 0           | 0            | 0           | 0            | 1             |                                                      |          |           |          |          |          |          |           |                   |
| DRB1*03:105                                                 | 03:105                 | HLA11608  |                                               | 0           | 0            | 2             | 0           | 0            | 0           | 0            | 2             |                                                      |          |           |          |          |          |          |           |                   |
| DRB1*03:108                                                 | 03:108                 | HLA11897  |                                               | 0           | 0            | 2             | 0           | 0            | 0           | 0            | 2             |                                                      |          |           |          |          |          |          |           |                   |
| DRB1*03:110                                                 | 03:110                 | HLA11959  |                                               | 0           | 0            | 1             | 0           | 0            | 0           | 0            | 1             |                                                      |          |           |          |          |          |          |           |                   |
| DRB1*03:115                                                 | 03:115                 | HLA12416  |                                               | 1           | 0            | 0             | 0           | 0            | 0           | 0            | 1             |                                                      |          |           |          |          |          |          |           |                   |
| DRB1*03:118                                                 | 03:118                 | HLA12829  |                                               | 0           | 0            | 1             | 0           | 0            | 0           | 0            | 1             |                                                      |          |           |          |          |          |          |           |                   |
| DRB1*03:121                                                 | 03:121                 | HLA13690  |                                               | 0           | 0            | 1             | 0           | 0            | 0           | 0            | 1             |                                                      |          |           |          |          |          |          |           |                   |
| DRB1*03:138                                                 | 03:138                 | HLA16791  |                                               | 0           | 1            | 0             | 0           | 0            | 0           | 0            | 1             |                                                      |          |           |          |          |          |          |           |                   |
| DRB1*03:CODE                                                | 03:CODE                |           |                                               | 2986        | 1592         | 59527         | 1572        | 4316         | 297         | 6347         | 76637         | NA                                                   | NA       | NA        | NA       | NA       | NA       | NA       | NA        | NA                |
| <b>DRB1*04:01 total</b>                                     | <b>04:01 total</b>     |           |                                               | <b>6707</b> | <b>14697</b> | <b>881988</b> | <b>5693</b> | <b>14010</b> | <b>2258</b> | <b>71870</b> | <b>997223</b> | <b>C</b>                                             | <b>C</b> | <b>C</b>  | <b>C</b> | <b>C</b> | <b>C</b> | <b>C</b> | <b>C</b>  | <b>C</b>          |
| DRB1*04:01                                                  | 04:01                  |           |                                               | 591         | 260          | 43897         | 309         | 1968         | 177         | 3819         | 51021         | C                                                    | C        | C         | C        | C        | C        | C        | C         | C                 |
| DRB1*04:01P                                                 | 04:01P                 |           |                                               | 0           | 0            | 56            | 0           | 0            | 0           | 0            | 56            |                                                      |          | WD        |          |          |          |          | WD        | WD                |
| <b>DRB1*04:01:01G total</b>                                 | <b>04:01:01G total</b> |           |                                               | <b>6116</b> | <b>14402</b> | <b>837921</b> | <b>5382</b> | <b>12040</b> | <b>2081</b> | <b>68043</b> | <b>945985</b> | <b>C</b>                                             | <b>C</b> | <b>C</b>  | <b>C</b> | <b>C</b> | <b>C</b> | <b>C</b> | <b>C</b>  | <b>C</b>          |
| DRB1*04:01:01G                                              | 04:01:01G              |           | 04:01:01G                                     | 519         | 9838         | 183982        | 834         | 1431         | 121         | 14730        | 211455        | C                                                    | C        | C         | C        | C        | C        | C        | C         | C                 |
| DRB1*04:01:01                                               | 04:01:01               |           | 04:01:01G                                     | 5597        | 4564         | 653894        | 4548        | 10608        | 1960        | 53310        | 734481        | C                                                    | C        | C         | C        | C        | C        | C        | C         | C                 |
| DRB1*04:01:01:01                                            | 04:01:01:01            | HLA00685  | 04:01:01G                                     | 0           | 0            | 34            | 0           | 1            | 0           | 0            | 35            |                                                      |          | WD        |          |          |          |          | WD        | WD                |
| DRB1*04:01:01:02                                            | 04:01:01:02            | HLA15166  | 04:01:01G                                     | 0           | 0            | 11            | 0           | 0            | 0           | 3            | 14            |                                                      |          | WD        |          |          |          |          | WD        | WD                |
| DRB1*04:01:02                                               | 04:01:02               | HLA00686  |                                               | 0           | 35           | 50            | 2           | 2            | 0           | 0            | 89            |                                                      | I        | WD        |          |          |          |          | WD        | I                 |
| DRB1*04:01:03                                               | 04:01:03               | HLA03066  |                                               | 0           | 0            | 23            | 0           | 0            | 0           | 5            | 28            |                                                      |          | WD        |          |          |          | WD       | WD        | WD                |
| DRB1*04:01:04                                               | 04:01:04               | HLA04661  |                                               | 0           | 0            | 3             | 0           | 0            | 0           | 0            | 3             |                                                      |          |           |          |          |          |          |           |                   |
| DRB1*04:01:05                                               | 04:01:05               | HLA04663  |                                               | 0           | 0            | 21            | 0           | 0            | 0           | 0            | 21            |                                                      |          | WD        |          |          |          |          | WD        | WD                |
| DRB1*04:01:06                                               | 04:01:06               | HLA04664  |                                               | 0           | 0            | 5             | 0           | 0            | 0           | 0            | 5             |                                                      |          | WD        |          |          |          |          | WD        | WD                |
| DRB1*04:01:07                                               | 04:01:07               | HLA06490  |                                               | 0           | 0            | 2             | 0           | 0            | 0           | 0            | 2             |                                                      |          |           |          |          |          |          |           |                   |
| DRB1*04:01:08                                               | 04:01:08               | HLA07154  |                                               | 0           | 0            | 4             | 0           | 0            | 0           | 0            | 4             |                                                      |          |           |          |          |          |          |           |                   |



| Supplemental Table 11: HLA-DRB1 Allele Summary <sup>a</sup> |                        |           | Allele Count by Population Group <sup>b</sup> |             |              |               |              |              |             |              |               | 3.0.0 CIWD Category by Population Group <sup>c</sup> |          |          |          |          |          |          |          |                   |
|-------------------------------------------------------------|------------------------|-----------|-----------------------------------------------|-------------|--------------|---------------|--------------|--------------|-------------|--------------|---------------|------------------------------------------------------|----------|----------|----------|----------|----------|----------|----------|-------------------|
| Allele                                                      | Genomic Typing         | Allele ID | G group                                       | AFA         | API          | EURO          | MENA         | HIS          | NAM         | UNK          | Total         | AFA                                                  | API      | EURO     | MENA     | HIS      | NAM      | UNK      | Total    | Highest Frequency |
| DRB1*04:01:09                                               | 04:01:09               | HLA08236  |                                               | 0           | 0            | 1             | 0            | 0            | 0           | 0            | 1             |                                                      |          |          |          |          |          |          |          |                   |
| DRB1*04:01:10                                               | 04:01:10               | HLA08797  |                                               | 0           | 0            | 3             | 0            | 0            | 0           | 0            | 3             |                                                      |          |          |          |          |          |          |          |                   |
| DRB1*04:01:12                                               | 04:01:12               | HLA09057  |                                               | 0           | 0            | 1             | 0            | 0            | 0           | 0            | 1             |                                                      |          |          |          |          |          |          |          |                   |
| DRB1*04:01:13                                               | 04:01:13               | HLA09757  |                                               | 0           | 0            | 1             | 0            | 0            | 0           | 0            | 1             |                                                      |          |          |          |          |          |          |          |                   |
| DRB1*04:01:14                                               | 04:01:14               | HLA10662  |                                               | 0           | 0            | 0             | 0            | 0            | 0           | 1            | 1             |                                                      |          |          |          |          |          |          |          |                   |
| DRB1*04:01:15                                               | 04:01:15               | HLA11371  |                                               | 0           | 0            | 0             | 0            | 0            | 0           | 1            | 1             |                                                      |          |          |          |          |          |          |          |                   |
| DRB1*04:01:17                                               | 04:01:17               | HLA14784  |                                               | 0           | 0            | 0             | 0            | 0            | 0           | 1            | 1             |                                                      |          |          |          |          |          |          |          |                   |
| <b>DRB1*04:02 total</b>                                     | <b>04:02 total</b>     |           |                                               | <b>644</b>  | <b>3951</b>  | <b>110655</b> | <b>16010</b> | <b>8726</b>  | <b>558</b>  | <b>27469</b> | <b>168013</b> | <b>C</b>                                             | <b>C</b> | <b>C</b> | <b>C</b> | <b>C</b> | <b>C</b> | <b>C</b> | <b>C</b> | <b>C</b>          |
| DRB1*04:02                                                  | 04:02                  |           |                                               | 64          | 163          | 11362         | 1113         | 1291         | 57          | 1674         | 15724         | C                                                    | C        | C        | C        | C        | C        | C        | C        | C                 |
| DRB1*04:02P                                                 | 04:02P                 |           |                                               | 0           | 0            | 35            | 2            | 0            | 0           | 0            | 37            |                                                      |          | WD       |          |          |          |          | WD       | WD                |
| DRB1*04:02:01                                               | 04:02:01               | HLA00687  |                                               | 580         | 3788         | 99258         | 14895        | 7435         | 501         | 25795        | 152252        | C                                                    | C        | C        | C        | C        | C        | C        | C        | C                 |
| <b>DRB1*04:03 total</b>                                     | <b>04:03 total</b>     |           |                                               | <b>1263</b> | <b>63675</b> | <b>89315</b>  | <b>18935</b> | <b>11758</b> | <b>952</b>  | <b>22483</b> | <b>208381</b> | <b>C</b>                                             | <b>C</b> | <b>C</b> | <b>C</b> | <b>C</b> | <b>C</b> | <b>C</b> | <b>C</b> | <b>C</b>          |
| DRB1*04:03                                                  | 04:03                  |           |                                               | 59          | 720          | 4526          | 868          | 1243         | 65          | 754          | 8235          | C                                                    | C        | C        | C        | C        | C        | C        | C        | C                 |
| DRB1*04:03P                                                 | 04:03P                 |           |                                               | 0           | 0            | 62            | 0            | 1            | 0           | 0            | 63            |                                                      |          | WD       |          |          |          |          | WD       | WD                |
| <b>DRB1*04:03:01G total</b>                                 | <b>04:03:01G total</b> |           |                                               | <b>1204</b> | <b>62916</b> | <b>84646</b>  | <b>18060</b> | <b>10514</b> | <b>887</b>  | <b>21725</b> | <b>199952</b> | <b>C</b>                                             | <b>C</b> | <b>C</b> | <b>C</b> | <b>C</b> | <b>C</b> | <b>C</b> | <b>C</b> | <b>C</b>          |
| DRB1*04:03:01G                                              | 04:03:01G              |           | 04:03:01G                                     | 15          | 8215         | 1672          | 166          | 392          | 8           | 1771         | 12239         | WD                                                   | C        | C        | C        | C        | C        | C        | C        | C                 |
| DRB1*04:03:01                                               | 04:03:01               |           | 04:03:01G                                     | 1189        | 54700        | 82972         | 17891        | 10122        | 879         | 19953        | 187706        | C                                                    | C        | C        | C        | C        | C        | C        | C        | C                 |
| DRB1*04:218                                                 | 04:218                 | HLA16045  | 04:03:01G                                     | 0           | 1            | 2             | 3            | 0            | 0           | 1            | 7             |                                                      |          |          |          |          |          |          | WD       | WD                |
| DRB1*04:03:02                                               | 04:03:02               | HLA01009  |                                               | 0           | 4            | 15            | 1            | 0            | 0           | 2            | 22            |                                                      |          | WD       |          |          |          |          | WD       | WD                |
| DRB1*04:03:03                                               | 04:03:03               | HLA02717  |                                               | 0           | 0            | 54            | 3            | 0            | 0           | 1            | 58            |                                                      |          | WD       |          |          |          |          | WD       | WD                |
| DRB1*04:03:04                                               | 04:03:04               | HLA03172  |                                               | 0           | 28           | 0             | 2            | 0            | 0           | 0            | 30            |                                                      | I        |          |          |          |          |          | WD       | I                 |
| DRB1*04:03:05                                               | 04:03:05               | HLA04660  |                                               | 0           | 0            | 4             | 0            | 0            | 0           | 0            | 4             |                                                      |          |          |          |          |          |          |          |                   |
| DRB1*04:03:08                                               | 04:03:08               | HLA07506  |                                               | 0           | 5            | 6             | 0            | 0            | 0           | 0            | 11            |                                                      | WD       | WD       |          |          |          |          | WD       | WD                |
| DRB1*04:03:09                                               | 04:03:09               | HLA10907  |                                               | 0           | 1            | 2             | 1            | 0            | 0           | 0            | 4             |                                                      |          |          |          |          |          |          |          |                   |
| DRB1*04:03:10                                               | 04:03:10               | HLA11162  |                                               | 0           | 0            | 0             | 0            | 0            | 0           | 1            | 1             |                                                      |          |          |          |          |          |          |          |                   |
| DRB1*04:03:11                                               | 04:03:11               | HLA14179  |                                               | 0           | 1            | 0             | 0            | 0            | 0           | 0            | 1             |                                                      |          |          |          |          |          |          |          |                   |
| <b>DRB1*04:04 total</b>                                     | <b>04:04 total</b>     |           |                                               | <b>3221</b> | <b>15656</b> | <b>322583</b> | <b>6681</b>  | <b>30979</b> | <b>2385</b> | <b>39410</b> | <b>420915</b> | <b>C</b>                                             | <b>C</b> | <b>C</b> | <b>C</b> | <b>C</b> | <b>C</b> | <b>C</b> | <b>C</b> | <b>C</b>          |
| DRB1*04:04                                                  | 04:04                  |           |                                               | 184         | 624          | 20485         | 525          | 3519         | 164         | 2455         | 27956         | C                                                    | C        | C        | C        | C        | C        | C        | C        | C                 |
| DRB1*04:04P                                                 | 04:04P                 |           |                                               | 0           | 0            | 33            | 1            | 0            | 0           | 1            | 35            |                                                      |          | WD       |          |          |          |          | WD       | WD                |
| DRB1*04:04:01                                               | 04:04:01               | HLA00689  |                                               | 3026        | 15027        | 302057        | 6155         | 27459        | 2221        | 36953        | 392898        | C                                                    | C        | C        | C        | C        | C        | C        | C        | C                 |
| DRB1*04:04:02                                               | 04:04:02               | HLA04039  |                                               | 0           | 2            | 1             | 0            | 1            | 0           | 0            | 4             |                                                      |          |          |          |          |          |          |          |                   |

| Supplemental Table 11: HLA-DRB1 Allele Summary <sup>a</sup> |                        |           | Allele Count by Population Group <sup>b</sup> |             |              |              |             |              |             |              |               | 3.0.0 CIWD Category by Population Group <sup>c</sup> |          |          |          |          |          |          |          |                   |
|-------------------------------------------------------------|------------------------|-----------|-----------------------------------------------|-------------|--------------|--------------|-------------|--------------|-------------|--------------|---------------|------------------------------------------------------|----------|----------|----------|----------|----------|----------|----------|-------------------|
| Allele                                                      | Genomic Typing         | Allele ID | G group                                       | AFA         | API          | EURO         | MENA        | HIS          | NAM         | UNK          | Total         | AFA                                                  | API      | EURO     | MENA     | HIS      | NAM      | UNK      | Total    | Highest Frequency |
| DRB1*04:04:03                                               | 04:04:03               | HLA04659  |                                               | 1           | 0            | 3            | 0           | 0            | 0           | 0            | 4             |                                                      |          |          |          |          |          |          |          |                   |
| DRB1*04:04:04                                               | 04:04:04               | HLA04662  |                                               | 9           | 0            | 0            | 0           | 0            | 0           | 0            | 9             | WD                                                   |          |          |          |          |          |          | WD       | WD                |
| DRB1*04:04:05                                               | 04:04:05               | HLA04710  |                                               | 0           | 0            | 1            | 0           | 0            | 0           | 0            | 1             |                                                      |          |          |          |          |          |          |          |                   |
| DRB1*04:04:06                                               | 04:04:06               | HLA06489  |                                               | 0           | 3            | 0            | 0           | 0            | 0           | 0            | 3             |                                                      |          |          |          |          |          |          |          |                   |
| DRB1*04:04:07                                               | 04:04:07               | HLA07551  |                                               | 1           | 0            | 1            | 0           | 0            | 0           | 1            | 3             |                                                      |          |          |          |          |          |          |          |                   |
| DRB1*04:04:08                                               | 04:04:08               | HLA08851  |                                               | 0           | 0            | 1            | 0           | 0            | 0           | 0            | 1             |                                                      |          |          |          |          |          |          |          |                   |
| DRB1*04:04:09                                               | 04:04:09               | HLA11160  |                                               | 0           | 0            | 1            | 0           | 0            | 0           | 0            | 1             |                                                      |          |          |          |          |          |          |          |                   |
| <b>DRB1*04:05 total</b>                                     | <b>04:05 total</b>     |           |                                               | <b>5878</b> | <b>27766</b> | <b>56671</b> | <b>8555</b> | <b>13264</b> | <b>1471</b> | <b>17122</b> | <b>130727</b> | <b>C</b>                                             | <b>C</b> | <b>C</b> | <b>C</b> | <b>C</b> | <b>C</b> | <b>C</b> | <b>C</b> | <b>C</b>          |
| DRB1*04:05                                                  | 04:05                  |           |                                               | 617         | 1744         | 4429         | 382         | 2006         | 111         | 1358         | 10647         | C                                                    | C        | C        | C        | C        | C        | C        | C        | C                 |
| DRB1*04:05P                                                 | 04:05P                 |           |                                               | 1           | 0            | 45           | 1           | 1            | 0           | 0            | 48            |                                                      |          | WD       |          |          |          |          | WD       | WD                |
| <b>DRB1*04:05:01G total</b>                                 | <b>04:05:01G total</b> |           |                                               | <b>5248</b> | <b>26005</b> | <b>52115</b> | <b>8170</b> | <b>11003</b> | <b>1338</b> | <b>15687</b> | <b>119566</b> | <b>C</b>                                             | <b>C</b> | <b>C</b> | <b>C</b> | <b>C</b> | <b>C</b> | <b>C</b> | <b>C</b> | <b>C</b>          |
| DRB1*04:05:01G                                              | 04:05:01G              |           | 04:05:01G                                     | 0           | 286          | 47           | 2           | 47           | 0           | 33           | 415           |                                                      | C        | WD       |          | I        |          | I        | I        | C                 |
| DRB1*04:05:01                                               | 04:05:01               |           | 04:05:01G                                     | 5248        | 25719        | 52068        | 8168        | 10956        | 1338        | 15654        | 119151        | C                                                    | C        | C        | C        | C        | C        | C        | C        | C                 |
| DRB1*04:05:03                                               | 04:05:03               | HLA01551  |                                               | 0           | 0            | 30           | 1           | 0            | 0           | 5            | 36            |                                                      |          | WD       |          |          |          | WD       | WD       | WD                |
| DRB1*04:05:04                                               | 04:05:04               | HLA01605  |                                               | 12          | 0            | 47           | 1           | 246          | 20          | 68           | 394           | WD                                                   |          | WD       |          | C        | C        | I        | I        | C                 |
| DRB1*04:05:05                                               | 04:05:05               | HLA03055  |                                               | 0           | 15           | 3            | 0           | 0            | 0           | 1            | 19            |                                                      | I        |          |          |          |          |          | WD       | I                 |
| DRB1*04:05:09                                               | 04:05:09               | HLA04654  |                                               | 0           | 0            | 2            | 0           | 8            | 2           | 3            | 15            |                                                      |          |          |          | I        |          |          | WD       | I                 |
| DRB1*04:05:13                                               | 04:05:13               | HLA07300  |                                               | 0           | 2            | 0            | 0           | 0            | 0           | 0            | 2             |                                                      |          |          |          |          |          |          |          |                   |
| <b>DRB1*04:06 total</b>                                     | <b>04:06 total</b>     |           |                                               | <b>195</b>  | <b>9368</b>  | <b>5811</b>  | <b>1335</b> | <b>1116</b>  | <b>49</b>   | <b>2951</b>  | <b>20825</b>  | <b>C</b>                                             | <b>C</b> | <b>C</b> | <b>C</b> | <b>C</b> | <b>C</b> | <b>C</b> | <b>C</b> | <b>C</b>          |
| DRB1*04:06                                                  | 04:06                  |           |                                               | 105         | 3134         | 1939         | 424         | 526          | 23          | 1949         | 8100          | C                                                    | C        | C        | C        | C        | C        | C        | C        | C                 |
| DRB1*04:06P                                                 | 04:06P                 |           |                                               | 0           | 0            | 2            | 0           | 0            | 0           | 0            | 2             |                                                      |          |          |          |          |          |          |          |                   |
| <b>DRB1*04:06:01G total</b>                                 | <b>04:06:01G total</b> |           |                                               | <b>90</b>   | <b>6234</b>  | <b>3870</b>  | <b>911</b>  | <b>590</b>   | <b>26</b>   | <b>1002</b>  | <b>12723</b>  | <b>C</b>                                             | <b>C</b> | <b>C</b> | <b>C</b> | <b>C</b> | <b>C</b> | <b>C</b> | <b>C</b> | <b>C</b>          |
| DRB1*04:06:01G                                              | 04:06:01G              |           | 04:06:01G                                     | 5           | 3169         | 308          | 374         | 162          | 4           | 415          | 4437          | WD                                                   | C        | I        | C        | C        |          |          | C        | C                 |
| DRB1*04:06:01                                               | 04:06:01               | HLA00692  | 04:06:01G                                     | 6           | 2986         | 166          | 81          | 10           | 4           | 425          | 3678          | WD                                                   | C        | I        | C        | I        |          |          | C        | C                 |
| DRB1*04:06:02                                               | 04:06:02               | HLA02172  | 04:06:01G                                     | 79          | 79           | 3396         | 456         | 418          | 18          | 162          | 4608          | C                                                    | I        | C        | C        | C        | C        | C        | C        | C                 |
| <b>DRB1*04:07 total</b>                                     | <b>04:07 total</b>     |           |                                               | <b>1835</b> | <b>2542</b>  | <b>93549</b> | <b>2146</b> | <b>44487</b> | <b>3642</b> | <b>17462</b> | <b>165663</b> | <b>C</b>                                             | <b>C</b> | <b>C</b> | <b>C</b> | <b>C</b> | <b>C</b> | <b>C</b> | <b>C</b> | <b>C</b>          |
| DRB1*04:07                                                  | 04:07                  |           |                                               | 2           | 2            | 343          | 0           | 34           | 6           | 36           | 423           |                                                      |          | I        |          | I        | WD       | I        | I        | I                 |
| DRB1*04:07P                                                 | 04:07P                 |           |                                               | 0           | 0            | 74           | 0           | 2            | 0           | 0            | 76            |                                                      |          | WD       |          |          |          |          | WD       | WD                |
| <b>DRB1*04:07:01G total</b>                                 | <b>04:07:01G total</b> |           |                                               | <b>1798</b> | <b>2538</b>  | <b>93048</b> | <b>2145</b> | <b>44205</b> | <b>3602</b> | <b>17253</b> | <b>164589</b> | <b>C</b>                                             | <b>C</b> | <b>C</b> | <b>C</b> | <b>C</b> | <b>C</b> | <b>C</b> | <b>C</b> | <b>C</b>          |
| DRB1*04:07:01G                                              | 04:07:01G              |           | 04:07:01G                                     | 1748        | 2465         | 90525        | 2078        | 42674        | 3431        | 16761        | 159682        | C                                                    | C        | C        | C        | C        | C        | C        | C        | C                 |
| DRB1*04:07:01                                               | 04:07:01               |           | 04:07:01G                                     | 49          | 72           | 2519         | 67          | 1453         | 163         | 481          | 4804          | C                                                    | I        | C        | C        | C        | C        | C        | C        | C                 |

| Supplemental Table 11: HLA-DRB1 Allele Summary <sup>a</sup> |                        |           | Allele Count by Population Group <sup>b</sup> |            |             |              |             |              |             |             |              | 3.0.0 CIWD Category by Population Group <sup>c</sup> |          |           |           |          |          |          |          |                   |
|-------------------------------------------------------------|------------------------|-----------|-----------------------------------------------|------------|-------------|--------------|-------------|--------------|-------------|-------------|--------------|------------------------------------------------------|----------|-----------|-----------|----------|----------|----------|----------|-------------------|
| Allele                                                      | Genomic Typing         | Allele ID | G group                                       | AFA        | API         | EURO         | MENA        | HIS          | NAM         | UNK         | Total        | AFA                                                  | API      | EURO      | MENA      | HIS      | NAM      | UNK      | Total    | Highest Frequency |
| DRB1*04:92                                                  | 04:92                  | HLA05868  | 04:07:01G                                     | 1          | 1           | 4            | 0           | 78           | 8           | 11          | 103          |                                                      |          |           |           | C        | C        | WD       | WD       | C                 |
| DRB1*04:07:02                                               | 04:07:02               | HLA01453  |                                               | 4          | 0           | 2            | 0           | 6            | 3           | 2           | 17           |                                                      |          |           |           | WD       |          |          | WD       | WD                |
| DRB1*04:07:03                                               | 04:07:03               | HLA01706  |                                               | 30         | 2           | 82           | 1           | 231          | 27          | 167         | 540          | WD                                                   |          | WD        |           | C        | C        | C        | I        | C                 |
| DRB1*04:07:04                                               | 04:07:04               | HLA04658  |                                               | 1          | 0           | 0            | 0           | 9            | 4           | 4           | 18           |                                                      |          |           |           | I        |          |          | WD       | I                 |
| <b>DRB1*04:08 total</b>                                     | <b>04:08 total</b>     |           |                                               | <b>357</b> | <b>3461</b> | <b>55250</b> | <b>1158</b> | <b>1618</b>  | <b>119</b>  | <b>4373</b> | <b>66336</b> | <b>C</b>                                             | <b>C</b> | <b>C</b>  | <b>C</b>  | <b>C</b> | <b>C</b> | <b>C</b> | <b>C</b> | <b>C</b>          |
| DRB1*04:08                                                  | 04:08                  |           |                                               | 29         | 115         | 3994         | 88          | 242          | 14          | 318         | 4800         | WD                                                   | I        | C         | C         | C        | C        | C        | C        | C                 |
| DRB1*04:08P                                                 | 04:08P                 |           |                                               | 0          | 0           | 3            | 0           | 0            | 0           | 0           | 3            |                                                      |          |           |           |          |          |          |          |                   |
| DRB1*04:08:01                                               | 04:08:01               | HLA00694  |                                               | 328        | 3345        | 51250        | 1069        | 1376         | 105         | 4055        | 61528        | C                                                    | C        | C         | C         | C        | C        | C        | C        | C                 |
| DRB1*04:08:02                                               | 04:08:02               | HLA04008  |                                               | 0          | 1           | 3            | 1           | 0            | 0           | 0           | 5            |                                                      |          |           |           |          |          |          | WD       | WD                |
| DRB1*04:09                                                  | 04:09                  | HLA00695  |                                               | 11         | 59          | 381          | 3           | 31           | 2           | 64          | 551          | WD                                                   | I        | I         |           | I        |          | I        | I        | I                 |
| <b>DRB1*04:10 total</b>                                     | <b>04:10 total</b>     |           |                                               | <b>103</b> | <b>3993</b> | <b>991</b>   | <b>318</b>  | <b>1736</b>  | <b>172</b>  | <b>899</b>  | <b>8212</b>  | <b>C</b>                                             | <b>C</b> | <b>I</b>  | <b>C</b>  | <b>C</b> | <b>C</b> | <b>C</b> | <b>C</b> | <b>C</b>          |
| DRB1*04:10                                                  | 04:10                  |           |                                               | 54         | 1007        | 514          | 139         | 1023         | 93          | 466         | 3296         | C                                                    | C        | I         | C         | C        | C        | C        | C        | C                 |
| DRB1*04:10P                                                 | 04:10P                 |           |                                               | 0          | 0           | 1            | 0           | 0            | 0           | 0           | 1            |                                                      |          |           |           |          |          |          |          |                   |
| <b>DRB1*04:10:01G total</b>                                 | <b>04:10:01G total</b> |           |                                               | <b>48</b>  | <b>2985</b> | <b>476</b>   | <b>179</b>  | <b>713</b>   | <b>79</b>   | <b>433</b>  | <b>4913</b>  | <b>C</b>                                             | <b>C</b> | <b>I</b>  | <b>C</b>  | <b>C</b> | <b>C</b> | <b>C</b> | <b>C</b> | <b>C</b>          |
| DRB1*04:10:01G                                              | 04:10:01G              |           | 04:10:01G                                     | 7          | 2421        | 248          | 87          | 231          | 17          | 216         | 3227         | WD                                                   | C        | I         | C         | C        | C        | C        | C        | C                 |
| DRB1*04:10:01                                               | 04:10:01               | HLA00696  | 04:10:01G                                     | 32         | 555         | 227          | 90          | 482          | 62          | 206         | 1654         | WD                                                   | C        | I         | C         | C        | C        | C        | C        | C                 |
| DRB1*04:10:03                                               | 04:10:03               | HLA11952  | 04:10:01G                                     | 0          | 9           | 0            | 0           | 0            | 0           | 9           | 18           |                                                      | WD       |           |           |          |          | WD       | WD       | WD                |
| DRB1*04:201                                                 | 04:201                 | HLA14002  | 04:10:01G                                     | 9          | 0           | 1            | 2           | 0            | 0           | 2           | 14           | WD                                                   |          |           |           |          |          |          | WD       | WD                |
| DRB1*04:10:02                                               | 04:10:02               | HLA07145  |                                               | 1          | 1           | 0            | 0           | 0            | 0           | 0           | 2            |                                                      |          |           |           |          |          |          |          |                   |
| <b>DRB1*04:11 total</b>                                     | <b>04:11 total</b>     |           |                                               | <b>469</b> | <b>143</b>  | <b>1848</b>  | <b>37</b>   | <b>13866</b> | <b>1600</b> | <b>3299</b> | <b>21262</b> | <b>C</b>                                             | <b>C</b> | <b>C</b>  | <b>WD</b> | <b>C</b> | <b>C</b> | <b>C</b> | <b>C</b> | <b>C</b>          |
| DRB1*04:11                                                  | 04:11                  |           |                                               | 77         | 17          | 662          | 4           | 2646         | 250         | 679         | 4335         | C                                                    | I        | I         |           | C        | C        | C        | C        | C                 |
| DRB1*04:11:01                                               | 04:11:01               | HLA00697  |                                               | 391        | 126         | 1186         | 33          | 11215        | 1350        | 2614        | 16915        | C                                                    | I        | I         | WD        | C        | C        | C        | C        | C                 |
| DRB1*04:11:02                                               | 04:11:02               | HLA08241  |                                               | 0          | 0           | 0            | 0           | 3            | 0           | 0           | 3            |                                                      |          |           |           |          |          |          |          |                   |
| DRB1*04:11:03                                               | 04:11:03               | HLA09311  |                                               | 1          | 0           | 0            | 0           | 2            | 0           | 6           | 9            |                                                      |          |           |           |          |          |          | WD       | WD                |
| DRB1*04:13                                                  | 04:13                  | HLA00699  |                                               | 0          | 93          | 169          | 144         | 2            | 3           | 22          | 433          |                                                      | I        | I         | C         |          |          |          | I        | I                 |
| DRB1*04:14                                                  | 04:14                  | HLA00700  |                                               | 0          | 1           | 389          | 1           | 2            | 0           | 25          | 418          |                                                      |          | I         |           |          |          |          | I        | I                 |
| DRB1*04:15                                                  | 04:15                  | HLA00701  |                                               | 0          | 0           | 108          | 2           | 3            | 0           | 10          | 123          |                                                      |          | WD        |           |          |          |          | WD       | WD                |
| DRB1*04:16                                                  | 04:16                  | HLA00702  |                                               | 1          | 0           | 41           | 0           | 3            | 0           | 1           | 46           |                                                      |          | WD        |           |          |          |          | WD       | WD                |
| <b>DRB1*04:17 total</b>                                     | <b>04:17 total</b>     |           |                                               | <b>12</b>  | <b>4</b>    | <b>31</b>    | <b>0</b>    | <b>186</b>   | <b>11</b>   | <b>79</b>   | <b>323</b>   | <b>WD</b>                                            |          | <b>WD</b> |           | <b>C</b> | <b>C</b> | <b>I</b> | <b>I</b> | <b>C</b>          |
| DRB1*04:17                                                  | 04:17                  |           |                                               | 1          | 0           | 9            | 0           | 29           | 0           | 23          | 62           |                                                      |          | WD        |           | I        |          | I        | WD       | I                 |
| DRB1*04:17:01                                               | 04:17:01               | HLA00703  |                                               | 0          | 0           | 15           | 0           | 42           | 0           | 28          | 85           |                                                      |          | WD        |           | I        |          | I        | WD       | I                 |

| Supplemental Table 11: HLA-DRB1 Allele Summary <sup>a</sup> |                    |           | Allele Count by Population Group <sup>b</sup> |          |          |          |          |          |          |          |           | 3.0.0 CIWD Category by Population Group <sup>c</sup> |     |           |      |     |     |     |           |                   |
|-------------------------------------------------------------|--------------------|-----------|-----------------------------------------------|----------|----------|----------|----------|----------|----------|----------|-----------|------------------------------------------------------|-----|-----------|------|-----|-----|-----|-----------|-------------------|
| Allele                                                      | Genomic Typing     | Allele ID | G group                                       | AFA      | API      | EURO     | MENA     | HIS      | NAM      | UNK      | Total     | AFA                                                  | API | EURO      | MENA | HIS | NAM | UNK | Total     | Highest Frequency |
| DRB1*04:17:02                                               | 04:17:02           | HLA04408  |                                               | 11       | 4        | 7        | 0        | 115      | 11       | 28       | 176       | WD                                                   |     | WD        |      | C   | C   | I   | I         | C                 |
| DRB1*04:18                                                  | 04:18              | HLA00704  |                                               | 0        | 439      | 1        | 2        | 0        | 2        | 7        | 451       |                                                      | C   |           |      |     |     | WD  | I         | C                 |
| DRB1*04:19                                                  | 04:19              | HLA00705  |                                               | 0        | 0        | 13       | 0        | 13       | 1        | 3        | 30        |                                                      |     | WD        |      | I   |     |     | WD        | I                 |
| DRB1*04:20                                                  | 04:20              | HLA00706  |                                               | 0        | 0        | 2        | 0        | 0        | 0        | 1        | 3         |                                                      |     |           |      |     |     |     |           |                   |
| DRB1*04:21                                                  | 04:21              | HLA00707  |                                               | 0        | 1        | 15       | 0        | 0        | 0        | 0        | 16        |                                                      |     | WD        |      |     |     |     | WD        | WD                |
| DRB1*04:22                                                  | 04:22              | HLA00708  |                                               | 0        | 0        | 1        | 1        | 0        | 0        | 1        | 3         |                                                      |     |           |      |     |     |     |           |                   |
| DRB1*04:23                                                  | 04:23              | HLA00709  |                                               | 2        | 0        | 24       | 0        | 27       | 0        | 4        | 57        |                                                      |     | WD        |      | I   |     |     | WD        | I                 |
| DRB1*04:24                                                  | 04:24              | HLA00710  |                                               | 0        | 1        | 0        | 0        | 0        | 0        | 0        | 1         |                                                      |     |           |      |     |     |     |           |                   |
| DRB1*04:25                                                  | 04:25              | HLA00711  |                                               | 1        | 0        | 2        | 0        | 9        | 0        | 3        | 15        |                                                      |     |           |      | I   |     |     | WD        | I                 |
| DRB1*04:26                                                  | 04:26              | HLA00712  |                                               | 0        | 0        | 73       | 0        | 0        | 0        | 24       | 97        |                                                      |     | WD        |      |     |     | I   | WD        | I                 |
| DRB1*04:27                                                  | 04:27              | HLA00713  |                                               | 0        | 1        | 4        | 0        | 0        | 0        | 2        | 7         |                                                      |     |           |      |     |     |     | WD        | WD                |
| DRB1*04:31                                                  | 04:31              | HLA00717  |                                               | 0        | 0        | 7        | 0        | 0        | 0        | 0        | 7         |                                                      |     | WD        |      |     |     |     | WD        | WD                |
| DRB1*04:33                                                  | 04:33              | HLA01088  |                                               | 0        | 0        | 26       | 0        | 0        | 1        | 2        | 29        |                                                      |     | WD        |      |     |     |     | WD        | WD                |
| DRB1*04:34                                                  | 04:34              | HLA01167  |                                               | 0        | 0        | 19       | 0        | 0        | 0        | 2        | 21        |                                                      |     | WD        |      |     |     |     | WD        | WD                |
| DRB1*04:35                                                  | 04:35              | HLA01235  |                                               | 4        | 3        | 44       | 0        | 1        | 0        | 6        | 58        |                                                      |     | WD        |      |     |     | WD  | WD        | WD                |
| DRB1*04:36                                                  | 04:36              | HLA01242  |                                               | 0        | 5        | 1        | 0        | 0        | 0        | 0        | 6         |                                                      | WD  |           |      |     |     |     | WD        | WD                |
| DRB1*04:37                                                  | 04:37              | HLA01338  |                                               | 0        | 1        | 18       | 0        | 11       | 0        | 12       | 42        |                                                      |     | WD        |      | I   |     | WD  | WD        | I                 |
| DRB1*04:38                                                  | 04:38              | HLA01345  |                                               | 3        | 3        | 192      | 0        | 6        | 0        | 39       | 243       |                                                      |     | I         |      | WD  |     | I   | I         | I                 |
| DRB1*04:39                                                  | 04:39              | HLA01458  |                                               | 0        | 0        | 22       | 0        | 0        | 0        | 2        | 24        |                                                      |     | WD        |      |     |     |     | WD        | WD                |
| DRB1*04:40                                                  | 04:40              | HLA01454  |                                               | 1        | 0        | 75       | 0        | 0        | 0        | 9        | 85        |                                                      |     | WD        |      |     |     | WD  | WD        | WD                |
| DRB1*04:41                                                  | 04:41              | HLA01459  |                                               | 0        | 39       | 2        | 0        | 1        | 0        | 14       | 56        |                                                      | I   |           |      |     |     | I   | WD        | I                 |
| DRB1*04:42                                                  | 04:42              | HLA01457  |                                               | 0        | 6        | 13       | 0        | 0        | 0        | 0        | 19        |                                                      | WD  | WD        |      |     |     |     | WD        | WD                |
| DRB1*04:43                                                  | 04:43              | HLA01499  |                                               | 0        | 0        | 16       | 0        | 0        | 0        | 4        | 20        |                                                      |     | WD        |      |     |     |     | WD        | WD                |
| <b>DRB1*04:44 total</b>                                     | <b>04:44 total</b> |           |                                               | <b>0</b> | <b>1</b> | <b>9</b> | <b>0</b> | <b>0</b> | <b>0</b> | <b>0</b> | <b>10</b> |                                                      |     | <b>WD</b> |      |     |     |     | <b>WD</b> | <b>WD</b>         |
| DRB1*04:44                                                  | 04:44              |           |                                               | 0        | 0        | 7        | 0        | 0        | 0        | 0        | 7         |                                                      |     | WD        |      |     |     |     | WD        | WD                |
| DRB1*04:44:01                                               | 04:44:01           | HLA01601  |                                               | 0        | 1        | 2        | 0        | 0        | 0        | 0        | 3         |                                                      |     |           |      |     |     |     |           |                   |
| DRB1*04:50                                                  | 04:50              | HLA01817  |                                               | 0        | 2        | 124      | 1        | 1        | 0        | 5        | 133       |                                                      |     | I         |      |     |     | WD  | WD        | I                 |
| DRB1*04:51                                                  | 04:51              | HLA02039  |                                               | 0        | 8        | 0        | 0        | 0        | 0        | 0        | 8         |                                                      | WD  |           |      |     |     |     | WD        | WD                |
| DRB1*04:52                                                  | 04:52              | HLA02054  |                                               | 0        | 0        | 4        | 0        | 0        | 0        | 0        | 4         |                                                      |     |           |      |     |     |     |           |                   |
| <b>DRB1*04:53 total</b>                                     | <b>04:53 total</b> |           |                                               | <b>0</b> | <b>0</b> | <b>1</b> | <b>0</b> | <b>0</b> | <b>0</b> | <b>0</b> | <b>1</b>  |                                                      |     |           |      |     |     |     |           |                   |
| DRB1*04:53                                                  | 04:53              |           |                                               | 0        | 0        | 1        | 0        | 0        | 0        | 0        | 1         |                                                      |     |           |      |     |     |     |           |                   |

| Supplemental Table 11: HLA-DRB1 Allele Summary <sup>a</sup> |                     |           | Allele Count by Population Group <sup>b</sup> |          |          |           |          |          |          |           |           | 3.0.0 CIWD Category by Population Group <sup>c</sup> |           |           |      |     |     |           |           |                   |
|-------------------------------------------------------------|---------------------|-----------|-----------------------------------------------|----------|----------|-----------|----------|----------|----------|-----------|-----------|------------------------------------------------------|-----------|-----------|------|-----|-----|-----------|-----------|-------------------|
| Allele                                                      | Genomic Typing      | Allele ID | G group                                       | AFA      | API      | EURO      | MENA     | HIS      | NAM      | UNK       | Total     | AFA                                                  | API       | EURO      | MENA | HIS | NAM | UNK       | Total     | Highest Frequency |
| DRB1*04:54                                                  | 04:54               | HLA02305  |                                               | 0        | 0        | 0         | 0        | 19       | 0        | 4         | 23        |                                                      |           |           |      | I   |     |           | WD        | I                 |
| DRB1*04:55                                                  | 04:55               | HLA02306  |                                               | 0        | 0        | 0         | 0        | 1        | 0        | 0         | 1         |                                                      |           |           |      |     |     |           |           |                   |
| <b>DRB1*04:56 total</b>                                     | <b>04:56 total</b>  |           |                                               | <b>0</b> | <b>6</b> | <b>39</b> | <b>0</b> | <b>1</b> | <b>1</b> | <b>2</b>  | <b>49</b> |                                                      | <b>WD</b> | <b>WD</b> |      |     |     |           | <b>WD</b> | <b>WD</b>         |
| DRB1*04:56                                                  | 04:56               |           |                                               | 0        | 3        | 14        | 0        | 1        | 0        | 0         | 18        |                                                      |           | WD        |      |     |     |           | WD        | WD                |
| DRB1*04:56:01                                               | 04:56:01            | HLA02314  |                                               | 0        | 3        | 25        | 0        | 0        | 1        | 0         | 29        |                                                      |           | WD        |      |     |     |           | WD        | WD                |
| DRB1*04:56:02                                               | 04:56:02            | HLA11068  |                                               | 0        | 0        | 0         | 0        | 0        | 0        | 2         | 2         |                                                      |           |           |      |     |     |           |           |                   |
| DRB1*04:59                                                  | 04:59               | HLA02580  |                                               | 0        | 1        | 17        | 3        | 0        | 0        | 0         | 21        |                                                      |           | WD        |      |     |     |           | WD        | WD                |
| DRB1*04:60                                                  | 04:60               | HLA02604  |                                               | 0        | 1        | 13        | 0        | 3        | 0        | 2         | 19        |                                                      |           | WD        |      |     |     |           | WD        | WD                |
| DRB1*04:62                                                  | 04:62               | HLA02726  |                                               | 0        | 24       | 1         | 0        | 0        | 0        | 0         | 25        |                                                      | I         |           |      |     |     |           | WD        | I                 |
| DRB1*04:64                                                  | 04:64               | HLA02804  |                                               | 0        | 0        | 7         | 0        | 0        | 0        | 1         | 8         |                                                      |           | WD        |      |     |     |           | WD        | WD                |
| DRB1*04:68                                                  | 04:68               | HLA03070  |                                               | 0        | 0        | 0         | 0        | 7        | 0        | 1         | 8         |                                                      |           |           |      | WD  |     |           | WD        | WD                |
| DRB1*04:70                                                  | 04:70               | HLA03073  |                                               | 0        | 0        | 24        | 0        | 0        | 0        | 0         | 24        |                                                      |           | WD        |      |     |     |           | WD        | WD                |
| DRB1*04:71                                                  | 04:71               | HLA03074  |                                               | 0        | 0        | 79        | 0        | 0        | 0        | 0         | 79        |                                                      |           | WD        |      |     |     |           | WD        | WD                |
| <b>DRB1*04:72 total</b>                                     | <b>04:72 total</b>  |           |                                               | <b>0</b> | <b>0</b> | <b>58</b> | <b>0</b> | <b>1</b> | <b>0</b> | <b>10</b> | <b>69</b> |                                                      |           | <b>WD</b> |      |     |     | <b>WD</b> | <b>WD</b> | <b>WD</b>         |
| DRB1*04:72                                                  | 04:72               |           |                                               | 0        | 0        | 6         | 0        | 0        | 0        | 3         | 9         |                                                      |           | WD        |      |     |     |           | WD        | WD                |
| DRB1*04:72:01                                               | 04:72:01            | HLA03158  |                                               | 0        | 0        | 51        | 0        | 1        | 0        | 7         | 59        |                                                      |           | WD        |      |     |     | WD        | WD        | WD                |
| DRB1*04:72:02                                               | 04:72:02            | HLA04673  |                                               | 0        | 0        | 1         | 0        | 0        | 0        | 0         | 1         |                                                      |           |           |      |     |     |           |           |                   |
| DRB1*04:74                                                  | 04:74               | HLA03296  |                                               | 0        | 0        | 0         | 0        | 0        | 1        | 1         | 2         |                                                      |           |           |      |     |     |           |           |                   |
| DRB1*04:75                                                  | 04:75               | HLA03371  |                                               | 0        | 0        | 1         | 0        | 0        | 0        | 2         | 3         |                                                      |           |           |      |     |     |           |           |                   |
| DRB1*04:76                                                  | 04:76               | HLA03372  |                                               | 0        | 0        | 7         | 0        | 0        | 0        | 0         | 7         |                                                      |           | WD        |      |     |     |           | WD        | WD                |
| DRB1*04:79                                                  | 04:79               | HLA03993  |                                               | 0        | 0        | 0         | 0        | 6        | 0        | 2         | 8         |                                                      |           |           |      | WD  |     |           | WD        | WD                |
| DRB1*04:80                                                  | 04:80               | HLA03998  |                                               | 0        | 2        | 0         | 0        | 0        | 0        | 0         | 2         |                                                      |           |           |      |     |     |           |           |                   |
| DRB1*04:83                                                  | 04:83               | HLA04036  |                                               | 0        | 0        | 7         | 0        | 1        | 0        | 0         | 8         |                                                      |           | WD        |      |     |     |           | WD        | WD                |
| DRB1*04:84                                                  | 04:84               | HLA04040  |                                               | 0        | 0        | 0         | 0        | 0        | 0        | 1         | 1         |                                                      |           |           |      |     |     |           |           |                   |
| DRB1*04:87                                                  | 04:87               | HLA04383  |                                               | 0        | 2        | 0         | 0        | 0        | 0        | 2         | 4         |                                                      |           |           |      |     |     |           |           |                   |
| DRB1*04:88                                                  | 04:88               | HLA04384  |                                               | 0        | 15       | 25        | 0        | 0        | 0        | 1         | 41        |                                                      | I         | WD        |      |     |     |           | WD        | I                 |
| DRB1*04:89                                                  | 04:89               | HLA04672  |                                               | 0        | 4        | 0         | 0        | 0        | 0        | 0         | 4         |                                                      |           |           |      |     |     |           |           |                   |
| <b>DRB1*04:94N total</b>                                    | <b>04:94N total</b> |           |                                               | <b>0</b> | <b>0</b> | <b>0</b>  | <b>0</b> | <b>0</b> | <b>0</b> | <b>1</b>  | <b>1</b>  |                                                      |           |           |      |     |     |           |           |                   |
| DRB1*04:94:01N                                              | 04:94:01N           | HLA06051  |                                               | 0        | 0        | 0         | 0        | 0        | 0        | 1         | 1         |                                                      |           |           |      |     |     |           |           |                   |
| <b>DRB1*04:95 total</b>                                     | <b>04:95 total</b>  |           |                                               | <b>0</b> | <b>6</b> | <b>1</b>  | <b>1</b> | <b>0</b> | <b>0</b> | <b>3</b>  | <b>11</b> |                                                      | <b>WD</b> |           |      |     |     |           | <b>WD</b> | <b>WD</b>         |
| DRB1*04:95                                                  | 04:95               |           |                                               | 0        | 1        | 0         | 0        | 0        | 0        | 1         | 2         |                                                      |           |           |      |     |     |           |           |                   |

| Supplemental Table 11: HLA-DRB1 Allele Summary <sup>a</sup> |                     |           | Allele Count by Population Group <sup>b</sup> |          |           |          |          |          |          |          |           | 3.0.0 CIWD Category by Population Group <sup>c</sup> |          |           |      |     |     |     |           |                   |    |
|-------------------------------------------------------------|---------------------|-----------|-----------------------------------------------|----------|-----------|----------|----------|----------|----------|----------|-----------|------------------------------------------------------|----------|-----------|------|-----|-----|-----|-----------|-------------------|----|
| Allele                                                      | Genomic Typing      | Allele ID | G group                                       | AFA      | API       | EURO     | MENA     | HIS      | NAM      | UNK      | Total     | AFA                                                  | API      | EURO      | MENA | HIS | NAM | UNK | Total     | Highest Frequency |    |
| DRB1*04:95:01                                               | 04:95:01            | HLA06296  |                                               | 0        | 3         | 0        | 1        | 0        | 0        | 1        | 5         |                                                      |          |           |      |     |     |     | WD        | WD                |    |
| DRB1*04:95:02                                               | 04:95:02            | HLA10160  |                                               | 0        | 2         | 1        | 0        | 0        | 0        | 1        | 4         |                                                      |          |           |      |     |     |     |           |                   |    |
| DRB1*04:96                                                  | 04:96               | HLA06488  |                                               | 0        | 1         | 39       | 5        | 0        | 0        | 0        | 45        |                                                      |          | WD        | WD   |     |     |     | WD        | WD                |    |
| <b>DRB1*04:98 total</b>                                     | <b>04:98 total</b>  |           |                                               | <b>0</b> | <b>0</b>  | <b>2</b> | <b>0</b> | <b>0</b> | <b>0</b> | <b>0</b> | <b>2</b>  |                                                      |          |           |      |     |     |     |           |                   |    |
| DRB1*04:98:02                                               | 04:98:02            | HLA07312  |                                               | 0        | 0         | 2        | 0        | 0        | 0        | 0        | 2         |                                                      |          |           |      |     |     |     |           |                   |    |
| DRB1*04:99                                                  | 04:99               | HLA06845  |                                               | 0        | 1         | 0        | 0        | 0        | 0        | 0        | 1         |                                                      |          |           |      |     |     |     |           |                   |    |
| DRB1*04:101                                                 | 04:101              | HLA06875  |                                               | 0        | 0         | 1        | 3        | 2        | 0        | 2        | 8         |                                                      |          |           |      |     |     |     | WD        | WD                |    |
| DRB1*04:102                                                 | 04:102              | HLA07088  |                                               | 0        | 0         | 0        | 0        | 2        | 0        | 0        | 2         |                                                      |          |           |      |     |     |     |           |                   |    |
| <b>DRB1*04:105 total</b>                                    | <b>04:105 total</b> |           |                                               | <b>0</b> | <b>17</b> | <b>6</b> | <b>0</b> | <b>0</b> | <b>0</b> | <b>1</b> | <b>24</b> |                                                      | <b>I</b> | <b>WD</b> |      |     |     |     | <b>WD</b> | <b>I</b>          |    |
| DRB1*04:105                                                 | 04:105              |           |                                               | 0        | 0         | 1        | 0        | 0        | 0        | 0        | 1         |                                                      |          |           |      |     |     |     |           |                   |    |
| DRB1*04:105:01                                              | 04:105:01           | HLA07166  |                                               | 0        | 0         | 4        | 0        | 0        | 0        | 1        | 5         |                                                      |          |           |      |     |     |     | WD        | WD                |    |
| DRB1*04:105:02                                              | 04:105:02           | HLA07870  |                                               | 0        | 17        | 1        | 0        | 0        | 0        | 0        | 18        |                                                      | <b>I</b> |           |      |     |     |     | WD        | <b>I</b>          |    |
| DRB1*04:106                                                 | 04:106              | HLA07250  |                                               | 1        | 0         | 0        | 0        | 0        | 0        | 0        | 1         |                                                      |          |           |      |     |     |     |           |                   |    |
| DRB1*04:107                                                 | 04:107              | HLA07352  |                                               | 0        | 1         | 2        | 0        | 0        | 0        | 0        | 3         |                                                      |          |           |      |     |     |     |           |                   |    |
| DRB1*04:112                                                 | 04:112              | HLA07935  |                                               | 0        | 0         | 2        | 0        | 0        | 0        | 0        | 2         |                                                      |          |           |      |     |     |     |           |                   |    |
| DRB1*04:113                                                 | 04:113              | HLA07936  |                                               | 0        | 0         | 1        | 2        | 0        | 0        | 0        | 3         |                                                      |          |           |      |     |     |     |           |                   |    |
| DRB1*04:114                                                 | 04:114              | HLA08121  |                                               | 0        | 0         | 1        | 0        | 0        | 0        | 0        | 1         |                                                      |          |           |      |     |     |     |           |                   |    |
| DRB1*04:116                                                 | 04:116              | HLA08233  |                                               | 0        | 0         | 3        | 0        | 1        | 0        | 0        | 4         |                                                      |          |           |      |     |     |     |           |                   |    |
| DRB1*04:117                                                 | 04:117              | HLA08234  |                                               | 0        | 0         | 1        | 0        | 0        | 0        | 0        | 1         |                                                      |          |           |      |     |     |     |           |                   |    |
| DRB1*04:119N                                                | 04:119N             | HLA08237  |                                               | 0        | 0         | 1        | 0        | 0        | 0        | 0        | 1         |                                                      |          |           |      |     |     |     |           |                   |    |
| DRB1*04:122                                                 | 04:122              | HLA08240  |                                               | 0        | 1         | 0        | 0        | 0        | 0        | 0        | 1         |                                                      |          |           |      |     |     |     |           |                   |    |
| DRB1*04:123                                                 | 04:123              | HLA08242  |                                               | 0        | 0         | 2        | 0        | 0        | 0        | 0        | 2         |                                                      |          |           |      |     |     |     |           |                   |    |
| DRB1*04:127                                                 | 04:127              | HLA08548  |                                               | 0        | 0         | 3        | 0        | 0        | 0        | 7        | 10        |                                                      |          |           |      |     |     |     | WD        | WD                | WD |
| DRB1*04:128                                                 | 04:128              | HLA08794  |                                               | 0        | 0         | 1        | 0        | 0        | 0        | 0        | 1         |                                                      |          |           |      |     |     |     |           |                   |    |
| DRB1*04:129                                                 | 04:129              | HLA08795  |                                               | 0        | 0         | 1        | 0        | 1        | 0        | 0        | 2         |                                                      |          |           |      |     |     |     |           |                   |    |
| DRB1*04:130                                                 | 04:130              | HLA08796  |                                               | 0        | 0         | 1        | 0        | 0        | 0        | 0        | 1         |                                                      |          |           |      |     |     |     |           |                   |    |
| DRB1*04:132                                                 | 04:132              | HLA08799  |                                               | 0        | 0         | 2        | 0        | 0        | 0        | 0        | 2         |                                                      |          |           |      |     |     |     |           |                   |    |
| DRB1*04:136                                                 | 04:136              | HLA08843  |                                               | 0        | 4         | 0        | 0        | 0        | 0        | 0        | 4         |                                                      |          |           |      |     |     |     |           |                   |    |
| DRB1*04:138                                                 | 04:138              | HLA08846  |                                               | 0        | 0         | 1        | 0        | 0        | 0        | 0        | 1         |                                                      |          |           |      |     |     |     |           |                   |    |
| DRB1*04:139                                                 | 04:139              | HLA08847  |                                               | 0        | 0         | 4        | 0        | 0        | 0        | 0        | 4         |                                                      |          |           |      |     |     |     |           |                   |    |
| DRB1*04:140                                                 | 04:140              | HLA08848  |                                               | 0        | 0         | 1        | 0        | 0        | 0        | 1        | 2         |                                                      |          |           |      |     |     |     |           |                   |    |

| Supplemental Table 11: HLA-DRB1 Allele Summary <sup>a</sup> |                    |           | Allele Count by Population Group <sup>b</sup> |              |               |                |              |              |             |               |                | 3.0.0 CIWD Category by Population Group <sup>c</sup> |          |          |          |          |          |          |          |                   |          |
|-------------------------------------------------------------|--------------------|-----------|-----------------------------------------------|--------------|---------------|----------------|--------------|--------------|-------------|---------------|----------------|------------------------------------------------------|----------|----------|----------|----------|----------|----------|----------|-------------------|----------|
| Allele                                                      | Genomic Typing     | Allele ID | G group                                       | AFA          | API           | EURO           | MENA         | HIS          | NAM         | UNK           | Total          | AFA                                                  | API      | EURO     | MENA     | HIS      | NAM      | UNK      | Total    | Highest Frequency |          |
| DRB1*04:142N                                                | 04:142N            | HLA08850  |                                               | 0            | 0             | 1              | 0            | 0            | 0           | 0             | 1              |                                                      |          |          |          |          |          |          |          |                   |          |
| DRB1*04:143                                                 | 04:143             | HLA08852  |                                               | 0            | 0             | 1              | 0            | 0            | 0           | 0             | 1              |                                                      |          |          |          |          |          |          |          |                   |          |
| DRB1*04:144                                                 | 04:144             | HLA08853  |                                               | 0            | 0             | 0              | 0            | 0            | 0           | 1             | 1              |                                                      |          |          |          |          |          |          |          |                   |          |
| DRB1*04:145                                                 | 04:145             | HLA08881  |                                               | 0            | 0             | 2              | 0            | 0            | 0           | 0             | 2              |                                                      |          |          |          |          |          |          |          |                   |          |
| DRB1*04:148                                                 | 04:148             | HLA09055  |                                               | 0            | 2             | 0              | 0            | 0            | 0           | 0             | 2              |                                                      |          |          |          |          |          |          |          |                   |          |
| DRB1*04:149                                                 | 04:149             | HLA09056  |                                               | 0            | 1             | 0              | 0            | 0            | 0           | 0             | 1              |                                                      |          |          |          |          |          |          |          |                   |          |
| DRB1*04:150                                                 | 04:150             | HLA09058  |                                               | 0            | 0             | 1              | 0            | 0            | 0           | 0             | 1              |                                                      |          |          |          |          |          |          |          |                   |          |
| DRB1*04:152                                                 | 04:152             | HLA09105  |                                               | 0            | 1             | 0              | 0            | 0            | 0           | 0             | 1              |                                                      |          |          |          |          |          |          |          |                   |          |
| DRB1*04:155                                                 | 04:155             | HLA09210  |                                               | 0            | 0             | 1              | 0            | 0            | 0           | 0             | 1              |                                                      |          |          |          |          |          |          |          |                   |          |
| DRB1*04:156                                                 | 04:156             | HLA09211  |                                               | 0            | 1             | 0              | 0            | 0            | 0           | 0             | 1              |                                                      |          |          |          |          |          |          |          |                   |          |
| DRB1*04:157N                                                | 04:157N            | HLA09306  |                                               | 0            | 0             | 0              | 0            | 0            | 0           | 1             | 1              |                                                      |          |          |          |          |          |          |          |                   |          |
| DRB1*04:158N                                                | 04:158N            | HLA09334  |                                               | 0            | 0             | 1              | 0            | 1            | 0           | 0             | 2              |                                                      |          |          |          |          |          |          |          |                   |          |
| DRB1*04:162                                                 | 04:162             | HLA09756  |                                               | 0            | 1             | 0              | 0            | 0            | 0           | 0             | 1              |                                                      |          |          |          |          |          |          |          |                   |          |
| DRB1*04:163                                                 | 04:163             | HLA09758  |                                               | 0            | 1             | 0              | 0            | 0            | 0           | 0             | 1              |                                                      |          |          |          |          |          |          |          |                   |          |
| DRB1*04:164                                                 | 04:164             | HLA09915  |                                               | 0            | 0             | 1              | 0            | 0            | 0           | 0             | 1              |                                                      |          |          |          |          |          |          |          |                   |          |
| DRB1*04:168                                                 | 04:168             | HLA10308  |                                               | 0            | 0             | 1              | 0            | 0            | 0           | 0             | 1              |                                                      |          |          |          |          |          |          |          |                   |          |
| DRB1*04:170                                                 | 04:170             | HLA10554  |                                               | 0            | 0             | 0              | 0            | 2            | 0           | 0             | 2              |                                                      |          |          |          |          |          |          |          |                   |          |
| DRB1*04:177                                                 | 04:177             | HLA11740  |                                               | 0            | 0             | 2              | 0            | 0            | 0           | 0             | 2              |                                                      |          |          |          |          |          |          |          |                   |          |
| DRB1*04:179                                                 | 04:179             | HLA11978  |                                               | 0            | 0             | 0              | 2            | 0            | 0           | 0             | 2              |                                                      |          |          |          |          |          |          |          |                   |          |
| DRB1*04:182                                                 | 04:182             | HLA12215  |                                               | 0            | 0             | 1              | 0            | 0            | 0           | 0             | 1              |                                                      |          |          |          |          |          |          |          |                   |          |
| DRB1*04:183                                                 | 04:183             | HLA12216  |                                               | 0            | 1             | 0              | 0            | 0            | 0           | 0             | 1              |                                                      |          |          |          |          |          |          |          |                   |          |
| DRB1*04:190                                                 | 04:190             | HLA13271  |                                               | 0            | 0             | 2              | 0            | 0            | 0           | 0             | 2              |                                                      |          |          |          |          |          |          |          |                   |          |
| DRB1*04:192                                                 | 04:192             | HLA13685  |                                               | 0            | 0             | 1              | 0            | 0            | 0           | 0             | 1              |                                                      |          |          |          |          |          |          |          |                   |          |
| DRB1*04:195                                                 | 04:195             | HLA13817  |                                               | 0            | 2             | 0              | 0            | 0            | 0           | 0             | 2              |                                                      |          |          |          |          |          |          |          |                   |          |
| DRB1*04:198                                                 | 04:198             | HLA13891  |                                               | 0            | 1             | 0              | 0            | 0            | 0           | 0             | 1              |                                                      |          |          |          |          |          |          |          |                   |          |
| DRB1*04:203                                                 | 04:203             | HLA14563  |                                               | 0            | 0             | 0              | 0            | 1            | 0           | 0             | 1              |                                                      |          |          |          |          |          |          |          |                   |          |
| DRB1*04:206                                                 | 04:206             | HLA14566  |                                               | 0            | 3             | 0              | 0            | 0            | 0           | 0             | 3              |                                                      |          |          |          |          |          |          |          |                   |          |
| DRB1*04:209                                                 | 04:209             | HLA15074  |                                               | 0            | 0             | 1              | 0            | 0            | 0           | 0             | 1              |                                                      |          |          |          |          |          |          |          |                   |          |
| DRB1*04:CODE                                                | 04:CODE            |           |                                               | 719          | 1441          | 32772          | 326          | 5857         | 373         | 4788          | 46276          | NA                                                   | NA       | NA       | NA       | NA       | NA       | NA       | NA       | NA                | NA       |
| <b>DRB1*07:01 total</b>                                     | <b>07:01 total</b> |           |                                               | <b>38798</b> | <b>177782</b> | <b>1525694</b> | <b>44979</b> | <b>71563</b> | <b>7000</b> | <b>159540</b> | <b>2025356</b> | <b>C</b>                                             | <b>C</b> | <b>C</b> | <b>C</b> | <b>C</b> | <b>C</b> | <b>C</b> | <b>C</b> | <b>C</b>          | <b>C</b> |
| DRB1*07:01                                                  | 07:01              |           |                                               | 4169         | 2820          | 87428          | 2649         | 9609         | 574         | 8145          | 115394         | C                                                    | C        | C        | C        | C        | C        | C        | C        | C                 | C        |

| Supplemental Table 11: HLA-DRB1 Allele Summary <sup>a</sup> |                        |           | Allele Count by Population Group <sup>b</sup> |              |               |                |              |              |             |               |                | 3.0.0 CIWD Category by Population Group <sup>c</sup> |          |          |          |          |          |          |          |                   |
|-------------------------------------------------------------|------------------------|-----------|-----------------------------------------------|--------------|---------------|----------------|--------------|--------------|-------------|---------------|----------------|------------------------------------------------------|----------|----------|----------|----------|----------|----------|----------|-------------------|
| Allele                                                      | Genomic Typing         | Allele ID | G group                                       | AFA          | API           | EURO           | MENA         | HIS          | NAM         | UNK           | Total          | AFA                                                  | API      | EURO     | MENA     | HIS      | NAM      | UNK      | Total    | Highest Frequency |
| DRB1*07:01P                                                 | 07:01P                 |           |                                               | 2            | 7             | 1904           | 10           | 8            | 0           | 4             | 1935           |                                                      | WD       | C        | WD       | I        |          |          | C        | C                 |
| <b>DRB1*07:01:01G total</b>                                 | <b>07:01:01G total</b> |           |                                               | <b>34624</b> | <b>174948</b> | <b>1436318</b> | <b>42317</b> | <b>61946</b> | <b>6426</b> | <b>151385</b> | <b>1907964</b> | <b>C</b>                                             | <b>C</b> | <b>C</b> | <b>C</b> | <b>C</b> | <b>C</b> | <b>C</b> | <b>C</b> | <b>C</b>          |
| DRB1*07:01:01G                                              | 07:01:01G              |           | 07:01:01G                                     | 7208         | 131947        | 439690         | 24672        | 17591        | 1065        | 71829         | 694002         | C                                                    | C        | C        | C        | C        | C        | C        | C        | C                 |
| DRB1*07:01:01                                               | 07:01:01               |           | 07:01:01G                                     | 27412        | 42993         | 996131         | 17645        | 44347        | 5361        | 79550         | 1213439        | C                                                    | C        | C        | C        | C        | C        | C        | C        | C                 |
| DRB1*07:01:01:01                                            | 07:01:01:01            | HLA00719  | 07:01:01G                                     | 0            | 3             | 179            | 0            | 0            | 0           | 0             | 182            |                                                      |          | I        |          |          |          |          | I        | I                 |
| DRB1*07:01:01:02                                            | 07:01:01:02            | HLA03486  | 07:01:01G                                     | 0            | 0             | 115            | 0            | 0            | 0           | 0             | 115            |                                                      |          | WD       |          |          |          |          | WD       | WD                |
| DRB1*07:01:01:03                                            | 07:01:01:03            | HLA14836  | 07:01:01G                                     | 4            | 5             | 31             | 0            | 7            | 0           | 4             | 51             |                                                      | WD       | WD       |          | WD       |          |          | WD       | WD                |
| DRB1*07:01:18                                               | 07:01:18               | HLA13507  | 07:01:01G                                     | 0            | 0             | 4              | 0            | 1            | 0           | 0             | 5              |                                                      |          |          |          |          |          |          | WD       | WD                |
| DRB1*07:01:21                                               | 07:01:21               | HLA15596  | 07:01:01G                                     | 0            | 0             | 4              | 0            | 0            | 0           | 0             | 4              |                                                      |          |          |          |          |          |          |          |                   |
| DRB1*07:34                                                  | 07:34                  | HLA11772  | 07:01:01G                                     | 0            | 0             | 155            | 0            | 0            | 0           | 2             | 157            |                                                      |          | I        |          |          |          |          | WD       | I                 |
| DRB1*07:72                                                  | 07:72                  | HLA15418  | 07:01:01G                                     | 0            | 0             | 9              | 0            | 0            | 0           | 0             | 9              |                                                      |          | WD       |          |          |          |          | WD       | WD                |
| DRB1*07:01:02                                               | 07:01:02               | HLA01089  |                                               | 0            | 0             | 19             | 0            | 0            | 0           | 1             | 20             |                                                      |          | WD       |          |          |          |          | WD       | WD                |
| DRB1*07:01:04                                               | 07:01:04               | HLA06847  |                                               | 0            | 0             | 1              | 0            | 0            | 0           | 0             | 1              |                                                      |          |          |          |          |          |          |          |                   |
| DRB1*07:01:05                                               | 07:01:05               | HLA09665  |                                               | 0            | 0             | 11             | 0            | 0            | 0           | 1             | 12             |                                                      |          | WD       |          |          |          |          | WD       | WD                |
| DRB1*07:01:06                                               | 07:01:06               | HLA09668  |                                               | 0            | 0             | 2              | 3            | 0            | 0           | 1             | 6              |                                                      |          |          |          |          |          |          | WD       | WD                |
| DRB1*07:01:07                                               | 07:01:07               | HLA09690  |                                               | 0            | 3             | 1              | 0            | 0            | 0           | 0             | 4              |                                                      |          |          |          |          |          |          |          |                   |
| DRB1*07:01:08                                               | 07:01:08               | HLA11942  |                                               | 0            | 0             | 5              | 0            | 0            | 0           | 0             | 5              |                                                      |          | WD       |          |          |          |          | WD       | WD                |
| DRB1*07:01:09                                               | 07:01:09               | HLA13056  |                                               | 3            | 0             | 1              | 0            | 0            | 0           | 1             | 5              |                                                      |          |          |          |          |          |          | WD       | WD                |
| DRB1*07:01:15                                               | 07:01:15               | HLA13069  |                                               | 0            | 0             | 3              | 0            | 0            | 0           | 2             | 5              |                                                      |          |          |          |          |          |          | WD       | WD                |
| DRB1*07:01:16                                               | 07:01:16               | HLA13167  |                                               | 0            | 4             | 0              | 0            | 0            | 0           | 0             | 4              |                                                      |          |          |          |          |          |          |          |                   |
| DRB1*07:01:17                                               | 07:01:17               | HLA13251  |                                               | 0            | 0             | 1              | 0            | 0            | 0           | 0             | 1              |                                                      |          |          |          |          |          |          |          |                   |
| DRB1*07:03                                                  | 07:03                  | HLA00721  |                                               | 1            | 1255          | 13             | 7            | 0            | 1           | 19            | 1296           |                                                      | C        | WD       | WD       |          |          |          | I        | I                 |
| DRB1*07:05                                                  | 07:05                  | HLA01415  |                                               | 0            | 0             | 137            | 0            | 5            | 1           | 19            | 162            |                                                      |          | I        |          | WD       |          |          | I        | I                 |
| DRB1*07:06                                                  | 07:06                  | HLA01514  |                                               | 0            | 0             | 1              | 0            | 0            | 0           | 0             | 1              |                                                      |          |          |          |          |          |          |          |                   |
| DRB1*07:07                                                  | 07:07                  | HLA01620  |                                               | 0            | 0             | 186            | 0            | 3            | 0           | 9             | 198            |                                                      |          | I        |          |          |          | WD       | I        | I                 |
| DRB1*07:10N                                                 | 07:10N                 | HLA02203  |                                               | 1            | 0             | 119            | 0            | 0            | 0           | 3             | 123            |                                                      |          | WD       |          |          |          |          | WD       | WD                |
| DRB1*07:11                                                  | 07:11                  | HLA02495  |                                               | 0            | 0             | 22             | 0            | 57           | 2           | 12            | 93             |                                                      |          | WD       |          | I        |          | WD       | WD       | I                 |
| DRB1*07:12                                                  | 07:12                  | HLA02735  |                                               | 0            | 2             | 0              | 0            | 0            | 0           | 0             | 2              |                                                      |          |          |          |          |          |          |          |                   |
| DRB1*07:13                                                  | 07:13                  | HLA02912  |                                               | 0            | 28            | 2              | 1            | 0            | 0           | 2             | 33             |                                                      | I        |          |          |          |          |          | WD       | I                 |
| DRB1*07:14                                                  | 07:14                  | HLA02932  |                                               | 0            | 0             | 2              | 0            | 0            | 0           | 1             | 3              |                                                      |          |          |          |          |          |          |          |                   |
| DRB1*07:15                                                  | 07:15                  | HLA03136  |                                               | 0            | 0             | 1              | 0            | 5            | 0           | 2             | 8              |                                                      |          |          |          | WD       |          |          | WD       | WD                |



| Supplemental Table 11: HLA-DRB1 Allele Summary <sup>a</sup> |                    |           | Allele Count by Population Group <sup>b</sup> |             |             |               |             |             |            |              |               | 3.0.0 CIWD Category by Population Group <sup>c</sup> |          |          |          |          |          |          |          |                   |
|-------------------------------------------------------------|--------------------|-----------|-----------------------------------------------|-------------|-------------|---------------|-------------|-------------|------------|--------------|---------------|------------------------------------------------------|----------|----------|----------|----------|----------|----------|----------|-------------------|
| Allele                                                      | Genomic Typing     | Allele ID | G group                                       | AFA         | API         | EURO          | MENA        | HIS         | NAM        | UNK          | Total         | AFA                                                  | API      | EURO     | MENA     | HIS      | NAM      | UNK      | Total    | Highest Frequency |
| DRB1*07:16                                                  | 07:16              | HLA03550  |                                               | 0           | 1           | 6             | 0           | 31          | 0          | 4            | 42            |                                                      |          | WD       |          | I        |          |          | WD       | I                 |
| DRB1*07:20                                                  | 07:20              | HLA06294  |                                               | 1           | 0           | 3             | 0           | 0           | 0          | 0            | 4             |                                                      |          |          |          |          |          |          |          |                   |
| DRB1*07:21                                                  | 07:21              | HLA06298  |                                               | 0           | 0           | 4             | 0           | 0           | 0          | 0            | 4             |                                                      |          |          |          |          |          |          |          |                   |
| DRB1*07:22                                                  | 07:22              | HLA07299  |                                               | 0           | 0           | 0             | 0           | 0           | 0          | 1            | 1             |                                                      |          |          |          |          |          |          |          |                   |
| DRB1*07:23                                                  | 07:23              | HLA09140  |                                               | 0           | 0           | 13            | 0           | 0           | 0          | 0            | 13            |                                                      |          | WD       |          |          |          |          | WD       | WD                |
| DRB1*07:24                                                  | 07:24              | HLA09335  |                                               | 0           | 1           | 0             | 0           | 0           | 0          | 0            | 1             |                                                      |          |          |          |          |          |          |          |                   |
| DRB1*07:26N                                                 | 07:26N             | HLA09680  |                                               | 0           | 0           | 6             | 0           | 0           | 0          | 0            | 6             |                                                      |          | WD       |          |          |          |          | WD       | WD                |
| DRB1*07:29                                                  | 07:29              | HLA10530  |                                               | 0           | 0           | 11            | 0           | 0           | 0          | 0            | 11            |                                                      |          | WD       |          |          |          |          | WD       | WD                |
| DRB1*07:30                                                  | 07:30              | HLA11753  |                                               | 0           | 0           | 26            | 0           | 0           | 0          | 0            | 26            |                                                      |          | WD       |          |          |          |          | WD       | WD                |
| DRB1*07:31                                                  | 07:31              | HLA11754  |                                               | 0           | 0           | 1             | 0           | 0           | 0          | 0            | 1             |                                                      |          |          |          |          |          |          |          |                   |
| DRB1*07:32                                                  | 07:32              | HLA11760  |                                               | 0           | 0           | 5             | 0           | 0           | 0          | 0            | 5             |                                                      |          | WD       |          |          |          |          | WD       | WD                |
| DRB1*07:33                                                  | 07:33              | HLA11763  |                                               | 0           | 0           | 2             | 0           | 0           | 0          | 0            | 2             |                                                      |          |          |          |          |          |          |          |                   |
| DRB1*07:37                                                  | 07:37              | HLA13054  |                                               | 0           | 0           | 3             | 0           | 0           | 0          | 0            | 3             |                                                      |          |          |          |          |          |          |          |                   |
| DRB1*07:39                                                  | 07:39              | HLA13057  |                                               | 0           | 0           | 7             | 0           | 0           | 0          | 0            | 7             |                                                      |          | WD       |          |          |          |          | WD       | WD                |
| DRB1*07:41                                                  | 07:41              | HLA13062  |                                               | 0           | 1           | 1             | 0           | 0           | 0          | 1            | 3             |                                                      |          |          |          |          |          |          |          |                   |
| DRB1*07:44                                                  | 07:44              | HLA13067  |                                               | 0           | 0           | 3             | 0           | 0           | 0          | 0            | 3             |                                                      |          |          |          |          |          |          |          |                   |
| DRB1*07:46                                                  | 07:46              | HLA13070  |                                               | 0           | 0           | 2             | 0           | 0           | 0          | 0            | 2             |                                                      |          |          |          |          |          |          |          |                   |
| DRB1*07:47                                                  | 07:47              | HLA13071  |                                               | 0           | 0           | 2             | 0           | 0           | 0          | 0            | 2             |                                                      |          |          |          |          |          |          |          |                   |
| DRB1*07:48                                                  | 07:48              | HLA13072  |                                               | 0           | 0           | 4             | 0           | 0           | 0          | 0            | 4             |                                                      |          |          |          |          |          |          |          |                   |
| DRB1*07:49                                                  | 07:49              | HLA13073  |                                               | 0           | 0           | 3             | 0           | 0           | 0          | 0            | 3             |                                                      |          |          |          |          |          |          |          |                   |
| DRB1*07:51                                                  | 07:51              | HLA13075  |                                               | 0           | 0           | 2             | 0           | 0           | 0          | 0            | 2             |                                                      |          |          |          |          |          |          |          |                   |
| DRB1*07:56                                                  | 07:56              | HLA13164  |                                               | 0           | 0           | 2             | 1           | 0           | 0          | 0            | 3             |                                                      |          |          |          |          |          |          |          |                   |
| DRB1*07:58N                                                 | 07:58N             | HLA13166  |                                               | 0           | 0           | 1             | 0           | 0           | 0          | 0            | 1             |                                                      |          |          |          |          |          |          |          |                   |
| DRB1*07:61                                                  | 07:61              | HLA13687  |                                               | 0           | 0           | 1             | 8           | 0           | 0          | 9            | 18            |                                                      |          |          | WD       |          |          | WD       | WD       | WD                |
| DRB1*07:64                                                  | 07:64              | HLA13886  |                                               | 0           | 0           | 3             | 0           | 0           | 0          | 0            | 3             |                                                      |          |          |          |          |          |          |          |                   |
| DRB1*07:65                                                  | 07:65              | HLA14047  |                                               | 0           | 2           | 1             | 0           | 0           | 0          | 0            | 3             |                                                      |          |          |          |          |          |          |          |                   |
| DRB1*07:67                                                  | 07:67              | HLA14355  |                                               | 0           | 0           | 1             | 0           | 0           | 0          | 0            | 1             |                                                      |          |          |          |          |          |          |          |                   |
| DRB1*07:77                                                  | 07:77              | HLA16786  |                                               | 0           | 1           | 0             | 0           | 0           | 0          | 0            | 1             |                                                      |          |          |          |          |          |          |          |                   |
| DRB1*07:CODE                                                | 07:CODE            |           |                                               | 712         | 555         | 19456         | 174         | 2904        | 134        | 1819         | 25754         | NA                                                   | NA       | NA       | NA       | NA       | NA       | NA       | NA       | NA                |
| <b>DRB1*08:01 total</b>                                     | <b>08:01 total</b> |           |                                               | <b>1357</b> | <b>3264</b> | <b>312103</b> | <b>2467</b> | <b>7747</b> | <b>762</b> | <b>24715</b> | <b>352415</b> | <b>C</b>                                             | <b>C</b> | <b>C</b> | <b>C</b> | <b>C</b> | <b>C</b> | <b>C</b> | <b>C</b> | <b>C</b>          |
| DRB1*08:01                                                  | 08:01              |           |                                               | 868         | 579         | 96712         | 679         | 4952        | 599        | 10817        | 115206        | C                                                    | C        | C        | C        | C        | C        | C        | C        | C                 |

| Supplemental Table 11: HLA-DRB1 Allele Summary <sup>a</sup> |                        |           | Allele Count by Population Group <sup>b</sup> |              |              |               |             |              |             |              |               | 3.0.0 CIWD Category by Population Group <sup>c</sup> |          |          |          |          |          |          |          |                   |
|-------------------------------------------------------------|------------------------|-----------|-----------------------------------------------|--------------|--------------|---------------|-------------|--------------|-------------|--------------|---------------|------------------------------------------------------|----------|----------|----------|----------|----------|----------|----------|-------------------|
| Allele                                                      | Genomic Typing         | Allele ID | G group                                       | AFA          | API          | EURO          | MENA        | HIS          | NAM         | UNK          | Total         | AFA                                                  | API      | EURO     | MENA     | HIS      | NAM      | UNK      | Total    | Highest Frequency |
| DRB1*08:01P                                                 | 08:01P                 |           |                                               | 0            | 1            | 214           | 0           | 2            | 0           | 0            | 217           |                                                      |          | I        |          |          |          |          | I        | I                 |
| <b>DRB1*08:01:01G total</b>                                 | <b>08:01:01G total</b> |           |                                               | <b>489</b>   | <b>2683</b>  | <b>215141</b> | <b>1788</b> | <b>2790</b>  | <b>162</b>  | <b>13888</b> | <b>236941</b> | <b>C</b>                                             | <b>C</b> | <b>C</b> | <b>C</b> | <b>C</b> | <b>C</b> | <b>C</b> | <b>C</b> | <b>C</b>          |
| DRB1*08:01:01G                                              | 08:01:01G              |           | 08:01:01G                                     | 435          | 2659         | 212680        | 1778        | 2444         | 140         | 13587        | 233723        | C                                                    | C        | C        | C        | C        | C        | C        | C        | C                 |
| DRB1*08:01:01                                               | 08:01:01               | HLA00723  | 08:01:01G                                     | 54           | 24           | 2459          | 10          | 345          | 22          | 300          | 3214          | C                                                    | I        | C        | WD       | C        | C        | C        | C        | C                 |
| DRB1*08:77                                                  | 08:77                  | HLA13774  | 08:01:01G                                     | 0            | 0            | 2             | 0           | 1            | 0           | 1            | 4             |                                                      |          |          |          |          |          |          |          |                   |
| DRB1*08:01:02                                               | 08:01:02               | HLA01585  |                                               | 0            | 0            | 13            | 0           | 1            | 1           | 2            | 17            |                                                      |          | WD       |          |          |          |          | WD       | WD                |
| DRB1*08:01:04                                               | 08:01:04               | HLA03821  |                                               | 0            | 0            | 3             | 0           | 0            | 0           | 8            | 11            |                                                      |          |          |          |          |          | WD       | WD       | WD                |
| DRB1*08:01:05                                               | 08:01:05               | HLA04011  |                                               | 0            | 1            | 20            | 0           | 2            | 0           | 0            | 23            |                                                      |          | WD       |          |          |          |          | WD       | WD                |
| <b>DRB1*08:02 total</b>                                     | <b>08:02 total</b>     |           |                                               | <b>740</b>   | <b>8048</b>  | <b>13290</b>  | <b>440</b>  | <b>48445</b> | <b>2960</b> | <b>13481</b> | <b>87404</b>  | <b>C</b>                                             | <b>C</b> | <b>C</b> | <b>C</b> | <b>C</b> | <b>C</b> | <b>C</b> | <b>C</b> | <b>C</b>          |
| DRB1*08:02                                                  | 08:02                  |           |                                               | 92           | 412          | 2757          | 54          | 6508         | 372         | 2253         | 12448         | C                                                    | C        | C        | C        | C        | C        | C        | C        | C                 |
| DRB1*08:02P                                                 | 08:02P                 |           |                                               | 0            | 0            | 4             | 0           | 0            | 0           | 0            | 4             |                                                      |          |          |          |          |          |          |          |                   |
| <b>DRB1*08:02:01G total</b>                                 | <b>08:02:01G total</b> |           |                                               | <b>644</b>   | <b>7633</b>  | <b>10508</b>  | <b>383</b>  | <b>41711</b> | <b>2581</b> | <b>11193</b> | <b>74653</b>  | <b>C</b>                                             | <b>C</b> | <b>C</b> | <b>C</b> | <b>C</b> | <b>C</b> | <b>C</b> | <b>C</b> | <b>C</b>          |
| DRB1*08:02:01G                                              | 08:02:01G              |           | 08:02:01G                                     | 3            | 3955         | 419           | 13          | 363          | 5           | 238          | 4996          |                                                      | C        | I        | WD       | C        | WD       | C        | C        | C                 |
| DRB1*08:02:01                                               | 08:02:01               |           | 08:02:01G                                     | 641          | 3678         | 10089         | 370         | 41348        | 2576        | 10955        | 69657         | C                                                    | C        | C        | C        | C        | C        | C        | C        | C                 |
| DRB1*08:02:02                                               | 08:02:02               | HLA00725  |                                               | 0            | 0            | 3             | 2           | 5            | 0           | 3            | 13            |                                                      |          |          |          | WD       |          |          | WD       | WD                |
| DRB1*08:02:03                                               | 08:02:03               | HLA01416  |                                               | 4            | 3            | 18            | 1           | 221          | 7           | 32           | 286           |                                                      |          | WD       |          | C        | C        | I        | I        | C                 |
| <b>DRB1*08:03 total</b>                                     | <b>08:03 total</b>     |           |                                               | <b>194</b>   | <b>30377</b> | <b>27278</b>  | <b>2687</b> | <b>1418</b>  | <b>93</b>   | <b>5395</b>  | <b>67442</b>  | <b>C</b>                                             | <b>C</b> | <b>C</b> | <b>C</b> | <b>C</b> | <b>C</b> | <b>C</b> | <b>C</b> | <b>C</b>          |
| DRB1*08:03                                                  | 08:03                  |           |                                               | 15           | 1371         | 1418          | 169         | 194          | 6           | 377          | 3550          | WD                                                   | C        | C        | C        | C        | WD       | C        | C        | C                 |
| DRB1*08:03P                                                 | 08:03P                 |           |                                               | 0            | 0            | 1             | 0           | 0            | 0           | 0            | 1             |                                                      |          |          |          |          |          |          |          |                   |
| <b>DRB1*08:03:02G total</b>                                 | <b>08:03:02G total</b> |           |                                               | <b>179</b>   | <b>29006</b> | <b>25826</b>  | <b>2518</b> | <b>1224</b>  | <b>87</b>   | <b>5018</b>  | <b>63858</b>  | <b>C</b>                                             | <b>C</b> | <b>C</b> | <b>C</b> | <b>C</b> | <b>C</b> | <b>C</b> | <b>C</b> | <b>C</b>          |
| DRB1*08:03:02G                                              | 08:03:02G              |           | 08:03:02G                                     | 1            | 9238         | 1294          | 108         | 15           | 1           | 36           | 10693         |                                                      | C        | C        | C        | I        |          | I        | C        | C                 |
| DRB1*08:03:02                                               | 08:03:02               |           | 08:03:02G                                     | 178          | 19768        | 24532         | 2410        | 1209         | 86          | 4982         | 53165         | C                                                    | C        | C        | C        | C        | C        | C        | C        | C                 |
| DRB1*08:03:03                                               | 08:03:03               | HLA07331  |                                               | 0            | 0            | 33            | 0           | 0            | 0           | 0            | 33            |                                                      |          | WD       |          |          |          |          | WD       | WD                |
| <b>DRB1*08:04 total</b>                                     | <b>08:04 total</b>     |           |                                               | <b>20845</b> | <b>1008</b>  | <b>26381</b>  | <b>2782</b> | <b>5577</b>  | <b>746</b>  | <b>7501</b>  | <b>64840</b>  | <b>C</b>                                             | <b>C</b> | <b>C</b> | <b>C</b> | <b>C</b> | <b>C</b> | <b>C</b> | <b>C</b> | <b>C</b>          |
| DRB1*08:04                                                  | 08:04                  |           |                                               | 3034         | 58           | 3104          | 170         | 1075         | 89          | 1095         | 8625          | C                                                    | I        | C        | C        | C        | C        | C        | C        | C                 |
| DRB1*08:04P                                                 | 08:04P                 |           |                                               | 0            | 0            | 23            | 0           | 0            | 0           | 0            | 23            |                                                      |          | WD       |          |          |          |          | WD       | WD                |
| DRB1*08:04:01                                               | 08:04:01               | HLA00728  |                                               | 17800        | 941          | 23191         | 2611        | 4084         | 634         | 6303         | 55564         | C                                                    | C        | C        | C        | C        | C        | C        | C        | C                 |
| DRB1*08:04:02                                               | 08:04:02               | HLA00729  |                                               | 0            | 0            | 1             | 0           | 0            | 0           | 0            | 1             |                                                      |          |          |          |          |          |          |          |                   |
| DRB1*08:04:03                                               | 08:04:03               | HLA00730  |                                               | 0            | 1            | 0             | 0           | 19           | 4           | 5            | 29            |                                                      |          |          |          | I        |          | WD       | WD       | I                 |
| DRB1*08:04:04                                               | 08:04:04               | HLA01414  |                                               | 9            | 8            | 37            | 1           | 399          | 19          | 97           | 570           | WD                                                   | WD       | WD       |          | C        | C        | I        | I        | C                 |
| DRB1*08:04:05                                               | 08:04:05               | HLA04685  |                                               | 1            | 0            | 25            | 0           | 0            | 0           | 1            | 27            |                                                      |          | WD       |          |          |          |          | WD       | WD                |

| Supplemental Table 11: HLA-DRB1 Allele Summary <sup>a</sup> |                    |           | Allele Count by Population Group <sup>b</sup> |          |          |          |          |          |          |          |          | 3.0.0 CIWD Category by Population Group <sup>c</sup> |     |      |      |     |     |     |       |                   |  |
|-------------------------------------------------------------|--------------------|-----------|-----------------------------------------------|----------|----------|----------|----------|----------|----------|----------|----------|------------------------------------------------------|-----|------|------|-----|-----|-----|-------|-------------------|--|
| Allele                                                      | Genomic Typing     | Allele ID | G group                                       | AFA      | API      | EURO     | MENA     | HIS      | NAM      | UNK      | Total    | AFA                                                  | API | EURO | MENA | HIS | NAM | UNK | Total | Highest Frequency |  |
| DRB1*08:04:06                                               | 08:04:06           | HLA06311  |                                               | 1        | 0        | 0        | 0        | 0        | 0        | 0        | 1        |                                                      |     |      |      |     |     |     |       |                   |  |
| DRB1*08:05                                                  | 08:05              | HLA00731  |                                               | 0        | 0        | 72       | 0        | 1        | 0        | 15       | 88       |                                                      |     | WD   |      |     |     | I   | WD    | I                 |  |
| DRB1*08:06                                                  | 08:06              | HLA00732  |                                               | 1952     | 16       | 1916     | 130      | 626      | 73       | 681      | 5394     | C                                                    | I   | C    | C    | C   | C   | C   | C     | C                 |  |
| DRB1*08:07                                                  | 08:07              | HLA00733  |                                               | 29       | 1        | 489      | 1        | 827      | 73       | 671      | 2091     | WD                                                   |     | I    |      | C   | C   | C   | C     | C                 |  |
| DRB1*08:08                                                  | 08:08              | HLA00734  |                                               | 86       | 0        | 3        | 7        | 0        | 0        | 16       | 112      | C                                                    |     |      | WD   |     |     | I   | WD    | C                 |  |
| DRB1*08:09                                                  | 08:09              | HLA00735  |                                               | 0        | 841      | 34       | 3        | 6        | 0        | 56       | 940      |                                                      | C   | WD   |      | WD  |     | I   | I     | C                 |  |
| DRB1*08:10                                                  | 08:10              | HLA00736  |                                               | 15       | 59       | 1031     | 68       | 107      | 9        | 133      | 1422     | WD                                                   | I   | I    | C    | C   | C   | C   | I     | C                 |  |
| DRB1*08:11                                                  | 08:11              | HLA00737  |                                               | 246      | 3        | 415      | 0        | 91       | 269      | 358      | 1382     | C                                                    |     | I    |      | C   | C   | C   | I     | C                 |  |
| DRB1*08:12                                                  | 08:12              | HLA00738  |                                               | 0        | 16       | 0        | 0        | 0        | 0        | 2        | 18       |                                                      | I   |      |      |     |     |     | WD    | I                 |  |
| DRB1*08:13                                                  | 08:13              | HLA00739  |                                               | 0        | 1        | 14       | 0        | 44       | 1        | 24       | 84       |                                                      |     | WD   |      | I   |     | I   | WD    | I                 |  |
| DRB1*08:14                                                  | 08:14              | HLA00740  |                                               | 0        | 22       | 0        | 0        | 0        | 0        | 0        | 22       |                                                      | I   |      |      |     |     |     | WD    | I                 |  |
| DRB1*08:16                                                  | 08:16              | HLA00742  |                                               | 0        | 0        | 7        | 0        | 0        | 0        | 1        | 8        |                                                      |     | WD   |      |     |     |     | WD    | WD                |  |
| DRB1*08:17                                                  | 08:17              | HLA00743  |                                               | 0        | 1        | 280      | 1        | 0        | 0        | 10       | 292      |                                                      |     | I    |      |     |     | WD  | I     | I                 |  |
| DRB1*08:18                                                  | 08:18              | HLA00744  |                                               | 0        | 84       | 45       | 3        | 29       | 0        | 33       | 194      |                                                      | I   | WD   |      | I   |     | I   | I     | I                 |  |
| DRB1*08:19                                                  | 08:19              | HLA00745  |                                               | 0        | 86       | 1        | 1        | 0        | 0        | 1        | 89       |                                                      | I   |      |      |     |     |     | WD    | I                 |  |
| DRB1*08:20                                                  | 08:20              | HLA00746  |                                               | 6        | 0        | 1        | 0        | 0        | 0        | 3        | 10       | WD                                                   |     |      |      |     |     |     | WD    | WD                |  |
| DRB1*08:21                                                  | 08:21              | HLA00747  |                                               | 0        | 1        | 0        | 0        | 0        | 0        | 0        | 1        |                                                      |     |      |      |     |     |     |       |                   |  |
| DRB1*08:22                                                  | 08:22              | HLA01282  |                                               | 0        | 0        | 4        | 0        | 0        | 0        | 2        | 6        |                                                      |     |      |      |     |     |     | WD    | WD                |  |
| <b>DRB1*08:24 total</b>                                     | <b>08:24 total</b> |           |                                               | <b>0</b> | <b>0</b> | <b>2</b> | <b>1</b> | <b>1</b> | <b>0</b> | <b>0</b> | <b>4</b> |                                                      |     |      |      |     |     |     |       |                   |  |
| DRB1*08:24                                                  | 08:24              |           |                                               | 0        | 0        | 2        | 1        | 1        | 0        | 0        | 4        |                                                      |     |      |      |     |     |     |       |                   |  |
| DRB1*08:26                                                  | 08:26              | HLA01814  |                                               | 0        | 0        | 59       | 1        | 1        | 0        | 0        | 61       |                                                      |     | WD   |      |     |     |     | WD    | WD                |  |
| DRB1*08:28                                                  | 08:28              | HLA01860  |                                               | 0        | 0        | 7        | 1        | 0        | 0        | 4        | 12       |                                                      |     | WD   |      |     |     |     | WD    | WD                |  |
| <b>DRB1*08:30 total</b>                                     | <b>08:30 total</b> |           |                                               | <b>0</b> | <b>1</b> | <b>0</b> | <b>0</b> | <b>0</b> | <b>0</b> | <b>1</b> | <b>2</b> |                                                      |     |      |      |     |     |     |       |                   |  |
| DRB1*08:30:03                                               | 08:30:03           | HLA06848  |                                               | 0        | 1        | 0        | 0        | 0        | 0        | 1        | 2        |                                                      |     |      |      |     |     |     |       |                   |  |
| DRB1*08:32                                                  | 08:32              | HLA02381  |                                               | 0        | 1        | 0        | 0        | 0        | 0        | 0        | 1        |                                                      |     |      |      |     |     |     |       |                   |  |
| DRB1*08:34                                                  | 08:34              | HLA03065  |                                               | 0        | 0        | 9        | 3        | 0        | 0        | 0        | 12       |                                                      |     | WD   |      |     |     |     | WD    | WD                |  |
| DRB1*08:35                                                  | 08:35              | HLA03384  |                                               | 0        | 3        | 0        | 0        | 0        | 0        | 1        | 4        |                                                      |     |      |      |     |     |     |       |                   |  |
| <b>DRB1*08:36 total</b>                                     | <b>08:36 total</b> |           |                                               | <b>0</b> | <b>3</b> | <b>0</b> | <b>0</b> | <b>0</b> | <b>0</b> | <b>0</b> | <b>3</b> |                                                      |     |      |      |     |     |     |       |                   |  |
| DRB1*08:36                                                  | 08:36              |           |                                               | 0        | 1        | 0        | 0        | 0        | 0        | 0        | 1        |                                                      |     |      |      |     |     |     |       |                   |  |
| DRB1*08:36:01                                               | 08:36:01           | HLA03489  |                                               | 0        | 2        | 0        | 0        | 0        | 0        | 0        | 2        |                                                      |     |      |      |     |     |     |       |                   |  |
| DRB1*08:38                                                  | 08:38              | HLA04009  |                                               | 0        | 1        | 0        | 0        | 0        | 0        | 0        | 1        |                                                      |     |      |      |     |     |     |       |                   |  |

| Supplemental Table 11: HLA-DRB1 Allele Summary <sup>a</sup> |                        |           | Allele Count by Population Group <sup>b</sup> |              |              |               |             |             |             |              |               | 3.0.0 CIWD Category by Population Group <sup>c</sup> |          |          |          |          |          |          |           |                   |
|-------------------------------------------------------------|------------------------|-----------|-----------------------------------------------|--------------|--------------|---------------|-------------|-------------|-------------|--------------|---------------|------------------------------------------------------|----------|----------|----------|----------|----------|----------|-----------|-------------------|
| Allele                                                      | Genomic Typing         | Allele ID | G group                                       | AFA          | API          | EURO          | MENA        | HIS         | NAM         | UNK          | Total         | AFA                                                  | API      | EURO     | MENA     | HIS      | NAM      | UNK      | Total     | Highest Frequency |
| DRB1*08:39                                                  | 08:39                  | HLA04124  |                                               | 0            | 0            | 1             | 0           | 0           | 0           | 0            | 1             |                                                      |          |          |          |          |          |          |           |                   |
| DRB1*08:40                                                  | 08:40                  | HLA04797  |                                               | 0            | 0            | 4             | 0           | 0           | 0           | 0            | 4             |                                                      |          |          |          |          |          |          |           |                   |
| DRB1*08:41                                                  | 08:41                  | HLA05851  |                                               | 0            | 0            | 1             | 0           | 0           | 0           | 0            | 1             |                                                      |          |          |          |          |          |          |           |                   |
| DRB1*08:43                                                  | 08:43                  | HLA06491  |                                               | 0            | 0            | 2             | 0           | 0           | 0           | 0            | 2             |                                                      |          |          |          |          |          |          |           |                   |
| DRB1*08:44                                                  | 08:44                  | HLA06492  |                                               | 0            | 0            | 12            | 0           | 0           | 0           | 0            | 12            |                                                      |          | WD       |          |          |          |          | WD        | WD                |
| <b>DRB1*08:45 total</b>                                     | <b>08:45 total</b>     |           |                                               | <b>0</b>     | <b>0</b>     | <b>1</b>      | <b>0</b>    | <b>0</b>    | <b>0</b>    | <b>0</b>     | <b>1</b>      |                                                      |          |          |          |          |          |          |           |                   |
| DRB1*08:45:01                                               | 08:45:01               | HLA06493  |                                               | 0            | 0            | 1             | 0           | 0           | 0           | 0            | 1             |                                                      |          |          |          |          |          |          |           |                   |
| DRB1*08:53                                                  | 08:53                  | HLA09097  |                                               | 0            | 1            | 0             | 0           | 0           | 0           | 0            | 1             |                                                      |          |          |          |          |          |          |           |                   |
| DRB1*08:58                                                  | 08:58                  | HLA11766  |                                               | 0            | 0            | 1             | 0           | 0           | 0           | 0            | 1             |                                                      |          |          |          |          |          |          |           |                   |
| DRB1*08:75                                                  | 08:75                  | HLA13279  |                                               | 0            | 0            | 1             | 0           | 0           | 0           | 0            | 1             |                                                      |          |          |          |          |          |          |           |                   |
| DRB1*08:82                                                  | 08:82                  | HLA15004  |                                               | 0            | 0            | 14            | 0           | 8           | 0           | 17           | 39            |                                                      |          | WD       |          | I        |          | I        | WD        | I                 |
| DRB1*08:CODE                                                | 08:CODE                |           |                                               | 206          | 438          | 3426          | 15          | 2425        | 102         | 872          | 7484          | NA                                                   | NA       | NA       | NA       | NA       | NA       | NA       | NA        | NA                |
| <b>DRB1*09:01 total</b>                                     | <b>09:01 total</b>     |           |                                               | <b>10391</b> | <b>47140</b> | <b>109415</b> | <b>2818</b> | <b>8827</b> | <b>1125</b> | <b>19684</b> | <b>199400</b> | <b>C</b>                                             | <b>C</b> | <b>C</b> | <b>C</b> | <b>C</b> | <b>C</b> | <b>C</b> | <b>C</b>  | <b>C</b>          |
| DRB1*09:01                                                  | 09:01                  |           |                                               | 256          | 461          | 1792          | 52          | 102         | 10          | 265          | 2938          | C                                                    | C        | C        | C        | C        | C        | C        | C         | C                 |
| DRB1*09:01P                                                 | 09:01P                 |           |                                               | 0            | 0            | 32            | 0           | 1           | 0           | 0            | 33            |                                                      |          | WD       |          |          |          |          | WD        | WD                |
| <b>DRB1*09:01:02G total</b>                                 | <b>09:01:02G total</b> |           |                                               | <b>10135</b> | <b>46679</b> | <b>107580</b> | <b>2766</b> | <b>8724</b> | <b>1115</b> | <b>19418</b> | <b>196417</b> | <b>C</b>                                             | <b>C</b> | <b>C</b> | <b>C</b> | <b>C</b> | <b>C</b> | <b>C</b> | <b>C</b>  | <b>C</b>          |
| DRB1*09:01:02G                                              | 09:01:02G              |           | 09:01:02G                                     | 5864         | 32966        | 71588         | 1841        | 6449        | 621         | 13432        | 132761        | C                                                    | C        | C        | C        | C        | C        | C        | C         | C                 |
| DRB1*09:01:02                                               | 09:01:02               |           | 09:01:02G                                     | 4271         | 13712        | 35992         | 925         | 2275        | 494         | 5986         | 63655         | C                                                    | C        | C        | C        | C        | C        | C        | C         | C                 |
| DRB1*09:21                                                  | 09:21                  | HLA09928  | 09:01:02G                                     | 0            | 1            | 0             | 0           | 0           | 0           | 0            | 1             |                                                      |          |          |          |          |          |          |           |                   |
| DRB1*09:01:06                                               | 09:01:06               | HLA03994  |                                               | 0            | 0            | 11            | 0           | 0           | 0           | 0            | 11            |                                                      |          | WD       |          |          |          |          | WD        | WD                |
| DRB1*09:01:11                                               | 09:01:11               | HLA13168  |                                               | 0            | 0            | 0             | 0           | 0           | 0           | 1            | 1             |                                                      |          |          |          |          |          |          |           |                   |
| <b>DRB1*09:02 total</b>                                     | <b>09:02 total</b>     |           |                                               | <b>0</b>     | <b>2</b>     | <b>4</b>      | <b>1</b>    | <b>0</b>    | <b>0</b>    | <b>0</b>     | <b>7</b>      |                                                      |          |          |          |          |          |          | <b>WD</b> | <b>WD</b>         |
| DRB1*09:02                                                  | 09:02                  |           |                                               | 0            | 0            | 1             | 0           | 0           | 0           | 0            | 1             |                                                      |          |          |          |          |          |          |           |                   |
| DRB1*09:02:01                                               | 09:02:01               | HLA01513  |                                               | 0            | 1            | 0             | 0           | 0           | 0           | 0            | 1             |                                                      |          |          |          |          |          |          |           |                   |
| DRB1*09:02:02                                               | 09:02:02               | HLA03547  |                                               | 0            | 1            | 3             | 1           | 0           | 0           | 0            | 5             |                                                      |          |          |          |          |          |          | WD        | WD                |
| DRB1*09:04                                                  | 09:04                  | HLA02018  |                                               | 0            | 18           | 1             | 1           | 0           | 0           | 0            | 20            |                                                      | I        |          |          |          |          |          | WD        | I                 |
| DRB1*09:06                                                  | 09:06                  | HLA02682  |                                               | 1            | 2            | 12            | 0           | 52          | 3           | 13           | 83            |                                                      |          | WD       |          | I        |          | WD       | WD        | I                 |
| DRB1*09:07                                                  | 09:07                  | HLA03301  |                                               | 0            | 1            | 0             | 0           | 0           | 0           | 0            | 1             |                                                      |          |          |          |          |          |          |           |                   |
| DRB1*09:10                                                  | 09:10                  | HLA06036  |                                               | 0            | 1            | 0             | 0           | 0           | 0           | 0            | 1             |                                                      |          |          |          |          |          |          |           |                   |
| DRB1*09:20                                                  | 09:20                  | HLA08429  |                                               | 0            | 1            | 104           | 0           | 0           | 0           | 0            | 105           |                                                      |          | WD       |          |          |          |          | WD        | WD                |
| DRB1*09:23                                                  | 09:23                  | HLA11770  |                                               | 0            | 0            | 0             | 0           | 0           | 0           | 1            | 1             |                                                      |          |          |          |          |          |          |           |                   |

| Supplemental Table 11: HLA-DRB1 Allele Summary <sup>a</sup> |                        |           | Allele Count by Population Group <sup>b</sup> |              |              |               |              |              |             |              |                | 3.0.0 CIWD Category by Population Group <sup>c</sup> |          |          |          |          |          |          |          |                   |
|-------------------------------------------------------------|------------------------|-----------|-----------------------------------------------|--------------|--------------|---------------|--------------|--------------|-------------|--------------|----------------|------------------------------------------------------|----------|----------|----------|----------|----------|----------|----------|-------------------|
| Allele                                                      | Genomic Typing         | Allele ID | G group                                       | AFA          | API          | EURO          | MENA         | HIS          | NAM         | UNK          | Total          | AFA                                                  | API      | EURO     | MENA     | HIS      | NAM      | UNK      | Total    | Highest Frequency |
| DRB1*09:27                                                  | 09:27                  | HLA14176  |                                               | 0            | 8            | 1             | 0            | 0            | 0           | 0            | 9              |                                                      | WD       |          |          |          |          |          | WD       | WD                |
| DRB1*09:CODE                                                | 09:CODE                |           |                                               | 562          | 1296         | 3362          | 139          | 507          | 49          | 695          | 6610           | NA                                                   | NA       | NA       | NA       | NA       | NA       | NA       | NA       | NA                |
| <b>DRB1*10:01 total</b>                                     | <b>10:01 total</b>     |           |                                               | <b>7762</b>  | <b>69978</b> | <b>103884</b> | <b>12255</b> | <b>10041</b> | <b>1231</b> | <b>20021</b> | <b>225172</b>  | <b>C</b>                                             | <b>C</b> | <b>C</b> | <b>C</b> | <b>C</b> | <b>C</b> | <b>C</b> | <b>C</b> | <b>C</b>          |
| DRB1*10:01                                                  | 10:01                  |           |                                               | 691          | 1091         | 5733          | 517          | 1391         | 90          | 1045         | 10558          | C                                                    | C        | C        | C        | C        | C        | C        | C        | C                 |
| DRB1*10:01P                                                 | 10:01P                 |           |                                               | 0            | 0            | 100           | 7            | 1            | 0           | 0            | 108            |                                                      |          | WD       | WD       |          |          |          | WD       | WD                |
| <b>DRB1*10:01:01G total</b>                                 | <b>10:01:01G total</b> |           |                                               | <b>7070</b>  | <b>68803</b> | <b>97865</b>  | <b>11725</b> | <b>8648</b>  | <b>1141</b> | <b>18965</b> | <b>214217</b>  | <b>C</b>                                             | <b>C</b> | <b>C</b> | <b>C</b> | <b>C</b> | <b>C</b> | <b>C</b> | <b>C</b> | <b>C</b>          |
| DRB1*10:01:01G                                              | 10:01:01G              |           | 10:01:01G                                     | 242          | 47522        | 12322         | 608          | 752          | 4           | 2824         | 64274          | C                                                    | C        | C        | C        | C        |          | C        | C        | C                 |
| DRB1*10:01:01                                               | 10:01:01               |           | 10:01:01G                                     | 6824         | 21254        | 85316         | 11080        | 7869         | 1133        | 16122        | 149598         | C                                                    | C        | C        | C        | C        | C        | C        | C        | C                 |
| DRB1*10:01:01:01                                            | 10:01:01:01            | HLA00750  | 10:01:01G                                     | 4            | 27           | 194           | 37           | 27           | 4           | 19           | 312            |                                                      | I        | I        | WD       | I        |          | I        | I        | I                 |
| DRB1*10:19                                                  | 10:19                  | HLA15606  | 10:01:01G                                     | 0            | 0            | 33            | 0            | 0            | 0           | 0            | 33             |                                                      |          | WD       |          |          |          |          | WD       | WD                |
| DRB1*10:01:02                                               | 10:01:02               | HLA01214  |                                               | 0            | 2            | 158           | 0            | 1            | 0           | 9            | 170            |                                                      |          | I        |          |          |          | WD       | I        | I                 |
| DRB1*10:01:03                                               | 10:01:03               | HLA03427  |                                               | 0            | 1            | 21            | 0            | 0            | 0           | 0            | 22             |                                                      |          | WD       |          |          |          |          | WD       | WD                |
| DRB1*10:01:04                                               | 10:01:04               | HLA09670  |                                               | 0            | 0            | 5             | 0            | 0            | 0           | 1            | 6              |                                                      |          | WD       |          |          |          |          | WD       | WD                |
| DRB1*10:01:07                                               | 10:01:07               | HLA13272  |                                               | 0            | 0            | 1             | 0            | 0            | 0           | 0            | 1              |                                                      |          |          |          |          |          |          |          |                   |
| DRB1*10:01:08                                               | 10:01:08               | HLA13273  |                                               | 1            | 81           | 0             | 5            | 0            | 0           | 1            | 88             |                                                      | I        |          | WD       |          |          |          | WD       | I                 |
| DRB1*10:01:09                                               | 10:01:09               | HLA14464  |                                               | 0            | 0            | 1             | 1            | 0            | 0           | 0            | 2              |                                                      |          |          |          |          |          |          |          |                   |
| DRB1*10:02                                                  | 10:02                  | HLA03054  |                                               | 2            | 36           | 7             | 0            | 0            | 0           | 0            | 45             |                                                      | I        | WD       |          |          |          |          | WD       | I                 |
| DRB1*10:03                                                  | 10:03                  | HLA03391  |                                               | 0            | 2            | 0             | 1            | 0            | 0           | 0            | 3              |                                                      |          |          |          |          |          |          |          |                   |
| DRB1*10:06                                                  | 10:06                  | HLA09672  |                                               | 0            | 7            | 1             | 0            | 0            | 0           | 0            | 8              |                                                      | WD       |          |          |          |          |          | WD       | WD                |
| DRB1*10:11                                                  | 10:11                  | HLA12814  |                                               | 0            | 0            | 3             | 0            | 0            | 0           | 0            | 3              |                                                      |          |          |          |          |          |          |          |                   |
| DRB1*10:12                                                  | 10:12                  | HLA12815  |                                               | 0            | 0            | 2             | 0            | 0            | 0           | 0            | 2              |                                                      |          |          |          |          |          |          |          |                   |
| DRB1*10:13                                                  | 10:13                  | HLA12817  |                                               | 0            | 0            | 3             | 1            | 0            | 0           | 0            | 4              |                                                      |          |          |          |          |          |          |          |                   |
| DRB1*10:15                                                  | 10:15                  | HLA13591  |                                               | 0            | 1            | 0             | 0            | 0            | 0           | 0            | 1              |                                                      |          |          |          |          |          |          |          |                   |
| DRB1*10:16                                                  | 10:16                  | HLA14049  |                                               | 0            | 2            | 0             | 0            | 0            | 0           | 0            | 2              |                                                      |          |          |          |          |          |          |          |                   |
| DRB1*10:CODE                                                | 10:CODE                |           |                                               | 300          | 421          | 2792          | 35           | 478          | 23          | 481          | 4530           | NA                                                   | NA       | NA       | NA       | NA       | NA       | NA       | NA       | NA                |
| <b>DRB1*11:01 total</b>                                     | <b>11:01 total</b>     |           |                                               | <b>29102</b> | <b>64904</b> | <b>826728</b> | <b>29875</b> | <b>26609</b> | <b>2705</b> | <b>76847</b> | <b>1056770</b> | <b>C</b>                                             | <b>C</b> | <b>C</b> | <b>C</b> | <b>C</b> | <b>C</b> | <b>C</b> | <b>C</b> | <b>C</b>          |
| DRB1*11:01                                                  | 11:01                  |           |                                               | 1122         | 167          | 22098         | 692          | 535          | 57          | 1720         | 26391          | C                                                    | C        | C        | C        | C        | C        | C        | C        | C                 |
| DRB1*11:01P                                                 | 11:01P                 |           |                                               | 2            | 2            | 1914          | 4            | 6            | 0           | 6            | 1934           |                                                      |          | C        |          | WD       |          | WD       | C        | C                 |
| <b>DRB1*11:01:01G total</b>                                 | <b>11:01:01G total</b> |           |                                               | <b>3976</b>  | <b>64476</b> | <b>797472</b> | <b>27472</b> | <b>21397</b> | <b>1936</b> | <b>68587</b> | <b>985316</b>  | <b>C</b>                                             | <b>C</b> | <b>C</b> | <b>C</b> | <b>C</b> | <b>C</b> | <b>C</b> | <b>C</b> | <b>C</b>          |
| DRB1*11:01:01G                                              | 11:01:01G              |           | 11:01:01G                                     | 2163         | 46810        | 235211        | 9113         | 12899        | 1208        | 55560        | 362964         | C                                                    | C        | C        | C        | C        | C        | C        | C        | C                 |
| DRB1*11:01:01                                               | 11:01:01               |           | 11:01:01G                                     | 1809         | 17635        | 560481        | 18349        | 8420         | 726         | 12974        | 620394         | C                                                    | C        | C        | C        | C        | C        | C        | C        | C                 |

| Supplemental Table 11: HLA-DRB1 Allele Summary <sup>a</sup> |                        |           |           | Allele Count by Population Group <sup>b</sup> |              |               |              |              |             |              |               | 3.0.0 CIWD Category by Population Group <sup>c</sup> |          |          |          |          |          |          |          |                   |
|-------------------------------------------------------------|------------------------|-----------|-----------|-----------------------------------------------|--------------|---------------|--------------|--------------|-------------|--------------|---------------|------------------------------------------------------|----------|----------|----------|----------|----------|----------|----------|-------------------|
| Allele                                                      | Genomic Typing         | Allele ID | G group   | AFA                                           | API          | EURO          | MENA         | HIS          | NAM         | UNK          | Total         | AFA                                                  | API      | EURO     | MENA     | HIS      | NAM      | UNK      | Total    | Highest Frequency |
| DRB1*11:01:01:01                                            | 11:01:01:01            | HLA00751  | 11:01:01G | 3                                             | 27           | 526           | 5            | 68           | 2           | 37           | 668           |                                                      | I        | I        | WD       | I        |          | I        | I        | I                 |
| DRB1*11:01:08                                               | 11:01:08               | HLA03812  | 11:01:01G | 1                                             | 4            | 1252          | 5            | 10           | 0           | 16           | 1288          |                                                      |          | C        | WD       | I        |          | I        | I        | C                 |
| DRB1*11:01:29                                               | 11:01:29               | HLA17342  | 11:01:01G | 0                                             | 0            | 2             | 0            | 0            | 0           | 0            | 2             |                                                      |          |          |          |          |          |          |          |                   |
| DRB1*11:01:02                                               | 11:01:02               | HLA00752  |           | 23990                                         | 234          | 5037          | 1684         | 4670         | 711         | 6513         | 42839         | C                                                    | C        | C        | C        | C        | C        | C        | C        | C                 |
| DRB1*11:01:03                                               | 11:01:03               | HLA00753  |           | 2                                             | 13           | 66            | 1            | 0            | 0           | 2            | 84            |                                                      | WD       | WD       |          |          |          |          | WD       | WD                |
| DRB1*11:01:04                                               | 11:01:04               | HLA01433  |           | 0                                             | 0            | 5             | 0            | 1            | 1           | 0            | 7             |                                                      |          | WD       |          |          |          |          | WD       | WD                |
| DRB1*11:01:05                                               | 11:01:05               | HLA01747  |           | 0                                             | 8            | 0             | 0            | 0            | 0           | 4            | 12            |                                                      | WD       |          |          |          |          |          | WD       | WD                |
| DRB1*11:01:06                                               | 11:01:06               | HLA02090  |           | 0                                             | 2            | 49            | 1            | 0            | 0           | 2            | 54            |                                                      |          | WD       |          |          |          |          | WD       | WD                |
| DRB1*11:01:07                                               | 11:01:07               | HLA02916  |           | 0                                             | 1            | 29            | 11           | 0            | 0           | 7            | 48            |                                                      |          | WD       | WD       |          |          | WD       | WD       | WD                |
| DRB1*11:01:09                                               | 11:01:09               | HLA03851  |           | 0                                             | 0            | 1             | 8            | 0            | 0           | 0            | 9             |                                                      |          |          | WD       |          |          |          | WD       | WD                |
| DRB1*11:01:10                                               | 11:01:10               | HLA03858  |           | 0                                             | 0            | 25            | 0            | 0            | 0           | 0            | 25            |                                                      |          | WD       |          |          |          |          | WD       | WD                |
| DRB1*11:01:11                                               | 11:01:11               | HLA04030  |           | 10                                            | 0            | 2             | 2            | 0            | 0           | 6            | 20            | WD                                                   |          |          |          |          |          | WD       | WD       | WD                |
| DRB1*11:01:12                                               | 11:01:12               | HLA05141  |           | 0                                             | 1            | 3             | 0            | 0            | 0           | 0            | 4             |                                                      |          |          |          |          |          |          |          |                   |
| DRB1*11:01:13                                               | 11:01:13               | HLA06483  |           | 0                                             | 0            | 15            | 0            | 0            | 0           | 0            | 15            |                                                      |          | WD       |          |          |          |          | WD       | WD                |
| DRB1*11:01:16                                               | 11:01:16               | HLA07263  |           | 0                                             | 0            | 11            | 0            | 0            | 0           | 0            | 11            |                                                      |          | WD       |          |          |          |          | WD       | WD                |
| DRB1*11:01:18                                               | 11:01:18               | HLA09069  |           | 0                                             | 0            | 1             | 0            | 0            | 0           | 0            | 1             |                                                      |          |          |          |          |          |          |          |                   |
| <b>DRB1*11:02 total</b>                                     | <b>11:02 total</b>     |           |           | <b>14257</b>                                  | <b>216</b>   | <b>30046</b>  | <b>1296</b>  | <b>7863</b>  | <b>1007</b> | <b>7261</b>  | <b>61946</b>  | <b>C</b>                                             | <b>C</b> | <b>C</b> | <b>C</b> | <b>C</b> | <b>C</b> | <b>C</b> | <b>C</b> | <b>C</b>          |
| DRB1*11:02                                                  | 11:02                  |           |           | 1845                                          | 18           | 2288          | 28           | 1414         | 108         | 736          | 6437          | C                                                    | I        | C        | WD       | C        | C        | C        | C        | C                 |
| DRB1*11:02P                                                 | 11:02P                 |           |           | 0                                             | 0            | 6             | 0            | 0            | 0           | 0            | 6             |                                                      |          | WD       |          |          |          |          | WD       | WD                |
| DRB1*11:02:01                                               | 11:02:01               | HLA00754  |           | 12401                                         | 198          | 27751         | 1268         | 6449         | 899         | 6525         | 55491         | C                                                    | C        | C        | C        | C        | C        | C        | C        | C                 |
| DRB1*11:02:02                                               | 11:02:02               | HLA02213  |           | 11                                            | 0            | 1             | 0            | 0            | 0           | 0            | 12            | WD                                                   |          |          |          |          |          |          | WD       | WD                |
| <b>DRB1*11:03 total</b>                                     | <b>11:03 total</b>     |           |           | <b>298</b>                                    | <b>541</b>   | <b>106499</b> | <b>2810</b>  | <b>3109</b>  | <b>187</b>  | <b>7018</b>  | <b>120462</b> | <b>C</b>                                             | <b>C</b> | <b>C</b> | <b>C</b> | <b>C</b> | <b>C</b> | <b>C</b> | <b>C</b> | <b>C</b>          |
| DRB1*11:03                                                  | 11:03                  |           |           | 226                                           | 384          | 69512         | 1932         | 2107         | 149         | 4756         | 79066         | C                                                    | C        | C        | C        | C        | C        | C        | C        | C                 |
| DRB1*11:03P                                                 | 11:03P                 |           |           | 0                                             | 0            | 50            | 0            | 0            | 0           | 0            | 50            |                                                      |          | WD       |          |          |          |          | WD       | WD                |
| DRB1*11:03:01                                               | 11:03:01               | HLA00755  |           | 72                                            | 157          | 36937         | 878          | 1002         | 38          | 2262         | 41346         | C                                                    | C        | C        | C        | C        | C        | C        | C        | C                 |
| <b>DRB1*11:04 total</b>                                     | <b>11:04 total</b>     |           |           | <b>3326</b>                                   | <b>12195</b> | <b>421999</b> | <b>40304</b> | <b>20519</b> | <b>1468</b> | <b>63240</b> | <b>563051</b> | <b>C</b>                                             | <b>C</b> | <b>C</b> | <b>C</b> | <b>C</b> | <b>C</b> | <b>C</b> | <b>C</b> | <b>C</b>          |
| DRB1*11:04                                                  | 11:04                  |           |           | 294                                           | 222          | 24288         | 2764         | 2885         | 103         | 2873         | 33429         | C                                                    | C        | C        | C        | C        | C        | C        | C        | C                 |
| DRB1*11:04P                                                 | 11:04P                 |           |           | 0                                             | 0            | 551           | 3            | 0            | 0           | 3            | 557           |                                                      |          | I        |          |          |          |          | I        | I                 |
| <b>DRB1*11:04:01G total</b>                                 | <b>11:04:01G total</b> |           |           | <b>1721</b>                                   | <b>11960</b> | <b>397019</b> | <b>37516</b> | <b>17532</b> | <b>1344</b> | <b>60080</b> | <b>527172</b> | <b>C</b>                                             | <b>C</b> | <b>C</b> | <b>C</b> | <b>C</b> | <b>C</b> | <b>C</b> | <b>C</b> | <b>C</b>          |
| DRB1*11:04:01G                                              | 11:04:01G              |           | 11:04:01G | 16                                            | 2190         | 21117         | 1843         | 1879         | 19          | 16727        | 43791         | WD                                                   | C        | C        | C        | C        | C        | C        | C        | C                 |
| DRB1*11:04:01                                               | 11:04:01               | HLA00756  | 11:04:01G | 1705                                          | 9770         | 375822        | 35673        | 15653        | 1324        | 43353        | 483300        | C                                                    | C        | C        | C        | C        | C        | C        | C        | C                 |

| Supplemental Table 11: HLA-DRB1 Allele Summary <sup>a</sup> |                        |           | Allele Count by Population Group <sup>b</sup> |            |             |            |           |           |           |            |             | 3.0.0 CIWD Category by Population Group <sup>c</sup> |          |           |           |          |           |           |           |                   |
|-------------------------------------------------------------|------------------------|-----------|-----------------------------------------------|------------|-------------|------------|-----------|-----------|-----------|------------|-------------|------------------------------------------------------|----------|-----------|-----------|----------|-----------|-----------|-----------|-------------------|
| Allele                                                      | Genomic Typing         | Allele ID | G group                                       | AFA        | API         | EURO       | MENA      | HIS       | NAM       | UNK        | Total       | AFA                                                  | API      | EURO      | MENA      | HIS      | NAM       | UNK       | Total     | Highest Frequency |
| DRB1*11:04:15                                               | 11:04:15               | HLA17430  | 11:04:01G                                     | 0          | 0           | 9          | 0         | 0         | 0         | 0          | 9           |                                                      |          | WD        |           |          |           |           | WD        | WD                |
| DRB1*11:198                                                 | 11:198                 | HLA14631  | 11:04:01G                                     | 0          | 0           | 71         | 0         | 0         | 1         | 0          | 72          |                                                      |          | WD        |           |          |           |           | WD        | WD                |
| DRB1*11:04:02                                               | 11:04:02               | HLA00757  |                                               | 1311       | 11          | 99         | 15        | 99        | 21        | 280        | 1836        | C                                                    | WD       | WD        | WD        | C        | C         | C         | C         | C                 |
| DRB1*11:04:03                                               | 11:04:03               | HLA02245  |                                               | 0          | 1           | 34         | 1         | 3         | 0         | 3          | 42          |                                                      |          | WD        |           |          |           |           | WD        | WD                |
| DRB1*11:04:04                                               | 11:04:04               | HLA02848  |                                               | 0          | 0           | 4          | 0         | 0         | 0         | 0          | 4           |                                                      |          |           |           |          |           |           |           |                   |
| DRB1*11:04:05                                               | 11:04:05               | HLA03867  |                                               | 0          | 1           | 1          | 5         | 0         | 0         | 1          | 8           |                                                      |          | WD        |           |          |           |           | WD        | WD                |
| DRB1*11:04:06                                               | 11:04:06               | HLA05846  |                                               | 0          | 0           | 3          | 0         | 0         | 0         | 0          | 3           |                                                      |          |           |           |          |           |           |           |                   |
| DRB1*11:05                                                  | 11:05                  | HLA00758  |                                               | 0          | 74          | 4          | 0         | 0         | 0         | 15         | 93          |                                                      | I        |           |           |          |           | I         | WD        | I                 |
| <b>DRB1*11:06 total</b>                                     | <b>11:06 total</b>     |           |                                               | <b>22</b>  | <b>3459</b> | <b>242</b> | <b>48</b> | <b>12</b> | <b>35</b> | <b>171</b> | <b>3989</b> | <b>WD</b>                                            | <b>C</b> | <b>I</b>  | <b>C</b>  | <b>I</b> | <b>C</b>  | <b>C</b>  | <b>C</b>  | <b>C</b>          |
| DRB1*11:06                                                  | 11:06                  |           |                                               | 0          | 16          | 12         | 0         | 0         | 0         | 4          | 32          |                                                      | I        | WD        |           |          |           |           | WD        | I                 |
| <b>DRB1*11:06:01G total</b>                                 | <b>11:06:01G total</b> |           |                                               | <b>17</b>  | <b>3442</b> | <b>188</b> | <b>48</b> | <b>12</b> | <b>35</b> | <b>158</b> | <b>3900</b> | <b>WD</b>                                            | <b>C</b> | <b>I</b>  | <b>C</b>  | <b>I</b> | <b>C</b>  | <b>C</b>  | <b>C</b>  | <b>C</b>          |
| DRB1*11:06:01G                                              | 11:06:01G              |           | 11:06:01G                                     | 9          | 2449        | 72         | 24        | 6         | 18        | 83         | 2661        | WD                                                   | C        | WD        | WD        | WD       | C         | I         | C         | C                 |
| DRB1*11:06:01                                               | 11:06:01               | HLA00759  | 11:06:01G                                     | 8          | 799         | 109        | 23        | 6         | 17        | 62         | 1024        | WD                                                   | C        | WD        | WD        | WD       | C         | I         | I         | C                 |
| DRB1*11:129                                                 | 11:129                 | HLA08091  | 11:06:01G                                     | 0          | 194         | 7          | 1         | 0         | 0         | 13         | 215         |                                                      | C        | WD        |           |          |           | WD        | I         | C                 |
| DRB1*11:06:02                                               | 11:06:02               | HLA01683  |                                               | 5          | 0           | 42         | 0         | 0         | 0         | 7          | 54          | WD                                                   |          | WD        |           |          |           | WD        | WD        | WD                |
| DRB1*11:06:03                                               | 11:06:03               | HLA07873  |                                               | 0          | 1           | 0          | 0         | 0         | 0         | 2          | 3           |                                                      |          |           |           |          |           |           |           |                   |
| <b>DRB1*11:07 total</b>                                     | <b>11:07 total</b>     |           |                                               | <b>6</b>   | <b>0</b>    | <b>73</b>  | <b>0</b>  | <b>8</b>  | <b>1</b>  | <b>13</b>  | <b>101</b>  | <b>WD</b>                                            |          | <b>WD</b> |           | <b>I</b> |           | <b>WD</b> | <b>WD</b> | <b>I</b>          |
| DRB1*11:07                                                  | 11:07                  |           |                                               | 5          | 0           | 53         | 0         | 7         | 1         | 11         | 77          | WD                                                   |          | WD        |           | WD       |           | WD        | WD        | WD                |
| DRB1*11:07:01                                               | 11:07:01               | HLA00760  |                                               | 1          | 0           | 19         | 0         | 1         | 0         | 2          | 23          |                                                      |          | WD        |           |          |           |           | WD        | WD                |
| DRB1*11:07:02                                               | 11:07:02               | HLA15005  |                                               | 0          | 0           | 1          | 0         | 0         | 0         | 0          | 1           |                                                      |          |           |           |          |           |           |           |                   |
| <b>DRB1*11:08 total</b>                                     | <b>11:08 total</b>     |           |                                               | <b>8</b>   | <b>981</b>  | <b>306</b> | <b>22</b> | <b>1</b>  | <b>5</b>  | <b>33</b>  | <b>1356</b> | <b>WD</b>                                            | <b>C</b> | <b>I</b>  | <b>WD</b> |          | <b>WD</b> | <b>I</b>  | <b>I</b>  | <b>C</b>          |
| DRB1*11:08                                                  | 11:08                  |           |                                               | 2          | 6           | 19         | 0         | 1         | 1         | 2          | 31          |                                                      | WD       | WD        |           |          |           |           | WD        | WD                |
| DRB1*11:08:01                                               | 11:08:01               | HLA00761  |                                               | 3          | 970         | 287        | 22        | 0         | 4         | 31         | 1317        |                                                      | C        | I         | WD        |          |           | I         | I         | C                 |
| DRB1*11:08:02                                               | 11:08:02               | HLA00762  |                                               | 3          | 0           | 0          | 0         | 0         | 0         | 0          | 3           |                                                      |          |           |           |          |           |           |           |                   |
| DRB1*11:08:03                                               | 11:08:03               | HLA11069  |                                               | 0          | 5           | 0          | 0         | 0         | 0         | 0          | 5           |                                                      | WD       |           |           |          |           |           | WD        | WD                |
| DRB1*11:09                                                  | 11:09                  | HLA00763  |                                               | 0          | 2           | 302        | 9         | 3         | 0         | 53         | 369         |                                                      |          | I         | WD        |          |           | I         | I         | I                 |
| <b>DRB1*11:10 total</b>                                     | <b>11:10 total</b>     |           |                                               | <b>502</b> | <b>1</b>    | <b>30</b>  | <b>1</b>  | <b>38</b> | <b>4</b>  | <b>106</b> | <b>682</b>  | <b>C</b>                                             |          | <b>WD</b> |           | <b>I</b> |           | <b>I</b>  | <b>I</b>  | <b>C</b>          |
| DRB1*11:10                                                  | 11:10                  |           |                                               | 37         | 0           | 5          | 0         | 5         | 0         | 9          | 56          | WD                                                   |          | WD        |           | WD       |           | WD        | WD        | WD                |
| DRB1*11:10:01                                               | 11:10:01               | HLA00764  |                                               | 465        | 1           | 22         | 0         | 33        | 4         | 97         | 622         | C                                                    |          | WD        |           | I        |           | I         | I         | C                 |
| DRB1*11:10:02                                               | 11:10:02               | HLA03443  |                                               | 0          | 0           | 3          | 1         | 0         | 0         | 0          | 4           |                                                      |          |           |           |          |           |           |           |                   |
| <b>DRB1*11:11 total</b>                                     | <b>11:11 total</b>     |           |                                               | <b>13</b>  | <b>1076</b> | <b>751</b> | <b>40</b> | <b>18</b> | <b>4</b>  | <b>242</b> | <b>2144</b> | <b>WD</b>                                            | <b>C</b> | <b>I</b>  | <b>WD</b> | <b>I</b> |           | <b>C</b>  | <b>C</b>  | <b>C</b>          |

| Supplemental Table 11: HLA-DRB1 Allele Summary <sup>a</sup> |                        |           | Allele Count by Population Group <sup>b</sup> |           |            |             |            |           |          |            |             | 3.0.0 CIWD Category by Population Group <sup>c</sup> |           |           |           |           |           |          |           |                   |
|-------------------------------------------------------------|------------------------|-----------|-----------------------------------------------|-----------|------------|-------------|------------|-----------|----------|------------|-------------|------------------------------------------------------|-----------|-----------|-----------|-----------|-----------|----------|-----------|-------------------|
| Allele                                                      | Genomic Typing         | Allele ID | G group                                       | AFA       | API        | EURO        | MENA       | HIS       | NAM      | UNK        | Total       | AFA                                                  | API       | EURO      | MENA      | HIS       | NAM       | UNK      | Total     | Highest Frequency |
| DRB1*11:11                                                  | 11:11                  |           |                                               | 7         | 102        | 357         | 10         | 12        | 2        | 132        | 622         | WD                                                   | I         | I         | WD        | I         |           | I        | I         | I                 |
| <b>DRB1*11:11:01G total</b>                                 | <b>11:11:01G total</b> |           |                                               | <b>5</b>  | <b>974</b> | <b>394</b>  | <b>30</b>  | <b>6</b>  | <b>2</b> | <b>109</b> | <b>1520</b> | <b>WD</b>                                            | <b>C</b>  | <b>I</b>  | <b>WD</b> | <b>WD</b> |           | <b>I</b> | <b>I</b>  | <b>C</b>          |
| DRB1*11:11:01G                                              | 11:11:01G              |           | 11:11:01G                                     | 1         | 486        | 144         | 17         | 1         | 0        | 21         | 670         |                                                      | C         | I         | WD        |           |           | I        | I         | C                 |
| DRB1*11:11:01                                               | 11:11:01               | HLA00765  | 11:11:01G                                     | 4         | 488        | 250         | 13         | 5         | 2        | 88         | 850         |                                                      | C         | I         | WD        | WD        |           | I        | I         | C                 |
| DRB1*11:11:03                                               | 11:11:03               | HLA11174  |                                               | 1         | 0          | 0           | 0          | 0         | 0        | 1          | 2           |                                                      |           |           |           |           |           |          |           |                   |
| <b>DRB1*11:12 total</b>                                     | <b>11:12 total</b>     |           |                                               | <b>6</b>  | <b>83</b>  | <b>1753</b> | <b>256</b> | <b>30</b> | <b>1</b> | <b>89</b>  | <b>2218</b> | <b>WD</b>                                            | <b>I</b>  | <b>C</b>  | <b>C</b>  | <b>I</b>  |           | <b>I</b> | <b>C</b>  | <b>C</b>          |
| DRB1*11:12                                                  | 11:12                  |           |                                               | 1         | 0          | 71          | 10         | 8         | 0        | 5          | 95          |                                                      |           | WD        | WD        | I         |           | WD       | WD        | I                 |
| DRB1*11:12P                                                 | 11:12P                 |           |                                               | 0         | 0          | 1           | 0          | 0         | 0        | 0          | 1           |                                                      |           |           |           |           |           |          |           |                   |
| DRB1*11:12:01                                               | 11:12:01               | HLA00766  |                                               | 5         | 83         | 1681        | 246        | 22        | 1        | 84         | 2122        | WD                                                   | I         | C         | C         | I         |           | I        | C         | C                 |
| <b>DRB1*11:13 total</b>                                     | <b>11:13 total</b>     |           |                                               | <b>5</b>  | <b>3</b>   | <b>858</b>  | <b>34</b>  | <b>25</b> | <b>0</b> | <b>37</b>  | <b>962</b>  | <b>WD</b>                                            |           | <b>I</b>  | <b>WD</b> | <b>I</b>  |           | <b>I</b> | <b>I</b>  | <b>I</b>          |
| <b>DRB1*11:13:01G total</b>                                 | <b>11:13:01G total</b> |           |                                               | <b>5</b>  | <b>3</b>   | <b>858</b>  | <b>34</b>  | <b>25</b> | <b>0</b> | <b>37</b>  | <b>962</b>  | <b>WD</b>                                            |           | <b>I</b>  | <b>WD</b> | <b>I</b>  |           | <b>I</b> | <b>I</b>  | <b>I</b>          |
| DRB1*11:13                                                  | 11:13                  |           |                                               | 2         | 2          | 256         | 10         | 11        | 0        | 15         | 296         |                                                      |           | I         | WD        | I         |           | I        | I         | I                 |
| DRB1*11:13:01G                                              | 11:13:01G              |           | 11:13:01G                                     | 1         | 0          | 30          | 0          | 2         | 0        | 10         | 43          |                                                      |           | WD        |           |           |           | WD       | WD        | WD                |
| DRB1*11:13:02                                               | 11:13:02               | HLA03562  | 11:13:01G                                     | 2         | 1          | 572         | 24         | 12        | 0        | 12         | 623         |                                                      |           | I         | WD        | I         |           | WD       | I         | I                 |
| <b>DRB1*11:14 total</b>                                     | <b>11:14 total</b>     |           |                                               | <b>41</b> | <b>6</b>   | <b>976</b>  | <b>3</b>   | <b>62</b> | <b>6</b> | <b>99</b>  | <b>1193</b> | <b>C</b>                                             | <b>WD</b> | <b>I</b>  |           | <b>I</b>  | <b>WD</b> | <b>I</b> | <b>I</b>  | <b>C</b>          |
| DRB1*11:14                                                  | 11:14                  |           |                                               | 6         | 0          | 75          | 0          | 11        | 1        | 17         | 110         | WD                                                   |           | WD        |           | I         |           | I        | WD        | I                 |
| DRB1*11:14:01                                               | 11:14:01               | HLA00768  |                                               | 2         | 6          | 896         | 2          | 46        | 5        | 79         | 1036        |                                                      | WD        | I         |           | I         | WD        | I        | I         | I                 |
| DRB1*11:14:02                                               | 11:14:02               | HLA02106  |                                               | 33        | 0          | 5           | 1          | 5         | 0        | 3          | 47          | WD                                                   |           | WD        |           | WD        |           |          | WD        | WD                |
| DRB1*11:15                                                  | 11:15                  | HLA00769  |                                               | 7         | 8          | 1584        | 147        | 87        | 8        | 133        | 1974        | WD                                                   | WD        | C         | C         | C         | C         | C        | C         | C                 |
| DRB1*11:16                                                  | 11:16                  | HLA00770  |                                               | 0         | 2          | 81          | 15         | 1         | 0        | 4          | 103         |                                                      |           | WD        | WD        |           |           |          | WD        | WD                |
| DRB1*11:17                                                  | 11:17                  | HLA00771  |                                               | 176       | 1          | 14          | 0          | 14        | 9        | 40         | 254         | C                                                    |           | WD        |           | I         | C         | I        | I         | C                 |
| DRB1*11:18                                                  | 11:18                  | HLA00772  |                                               | 4         | 52         | 106         | 4          | 6         | 0        | 16         | 188         |                                                      | I         | WD        |           | WD        |           | I        | I         | I                 |
| <b>DRB1*11:19 total</b>                                     | <b>11:19 total</b>     |           |                                               | <b>2</b>  | <b>7</b>   | <b>653</b>  | <b>2</b>   | <b>46</b> | <b>1</b> | <b>39</b>  | <b>750</b>  |                                                      | <b>WD</b> | <b>I</b>  |           | <b>I</b>  |           | <b>I</b> | <b>I</b>  | <b>I</b>          |
| DRB1*11:19                                                  | 11:19                  |           |                                               | 0         | 0          | 37          | 0          | 7         | 0        | 6          | 50          |                                                      |           | WD        |           | WD        |           | WD       | WD        | WD                |
| DRB1*11:19:01                                               | 11:19:01               | HLA00773  |                                               | 0         | 7          | 616         | 2          | 39        | 1        | 33         | 698         |                                                      | WD        | I         |           | I         |           | I        | I         | I                 |
| DRB1*11:19:03                                               | 11:19:03               | HLA06500  |                                               | 2         | 0          | 0           | 0          | 0         | 0        | 0          | 2           |                                                      |           |           |           |           |           |          |           |                   |
| DRB1*11:20                                                  | 11:20                  | HLA00774  |                                               | 1         | 0          | 29          | 1          | 0         | 0        | 4          | 35          |                                                      |           | WD        |           |           |           |          | WD        | WD                |
| DRB1*11:21                                                  | 11:21                  | HLA00775  |                                               | 0         | 0          | 28          | 0          | 0         | 0        | 0          | 28          |                                                      |           | WD        |           |           |           |          | WD        | WD                |
| <b>DRB1*11:23 total</b>                                     | <b>11:23 total</b>     |           |                                               | <b>0</b>  | <b>2</b>   | <b>10</b>   | <b>1</b>   | <b>1</b>  | <b>0</b> | <b>16</b>  | <b>30</b>   |                                                      |           | <b>WD</b> |           |           |           | <b>I</b> | <b>WD</b> | <b>I</b>          |
| DRB1*11:23                                                  | 11:23                  |           |                                               | 0         | 0          | 1           | 0          | 1         | 0        | 2          | 4           |                                                      |           |           |           |           |           |          |           |                   |
| DRB1*11:23:01                                               | 11:23:01               | HLA00777  |                                               | 0         | 0          | 3           | 1          | 0         | 0        | 0          | 4           |                                                      |           |           |           |           |           |          |           |                   |



| Supplemental Table 11: HLA-DRB1 Allele Summary <sup>a</sup> |                    |           | Allele Count by Population Group <sup>b</sup> |          |           |            |           |           |          |           |            | 3.0.0 CIWD Category by Population Group <sup>c</sup> |           |           |           |          |     |           |           |                   |
|-------------------------------------------------------------|--------------------|-----------|-----------------------------------------------|----------|-----------|------------|-----------|-----------|----------|-----------|------------|------------------------------------------------------|-----------|-----------|-----------|----------|-----|-----------|-----------|-------------------|
| Allele                                                      | Genomic Typing     | Allele ID | G group                                       | AFA      | API       | EURO       | MENA      | HIS       | NAM      | UNK       | Total      | AFA                                                  | API       | EURO      | MENA      | HIS      | NAM | UNK       | Total     | Highest Frequency |
| DRB1*11:23:02                                               | 11:23:02           | HLA09687  |                                               | 0        | 2         | 6          | 0         | 0         | 0        | 14        | 22         |                                                      |           | WD        |           |          |     | I         | WD        | I                 |
| DRB1*11:24                                                  | 11:24              | HLA00778  |                                               | 5        | 0         | 222        | 15        | 7         | 1        | 18        | 268        | WD                                                   |           | I         | WD        | WD       |     | I         | I         | I                 |
| DRB1*11:25                                                  | 11:25              | HLA00779  |                                               | 0        | 0         | 100        | 0         | 0         | 0        | 1         | 101        |                                                      |           | WD        |           |          |     |           | WD        | WD                |
| DRB1*11:26                                                  | 11:26              | HLA00780  |                                               | 0        | 0         | 6          | 1         | 0         | 0        | 6         | 13         |                                                      |           | WD        |           |          |     | WD        | WD        | WD                |
| <b>DRB1*11:27 total</b>                                     | <b>11:27 total</b> |           |                                               | <b>1</b> | <b>6</b>  | <b>464</b> | <b>1</b>  | <b>12</b> | <b>0</b> | <b>12</b> | <b>496</b> |                                                      | <b>WD</b> | <b>I</b>  |           | <b>I</b> |     | <b>WD</b> | <b>I</b>  | <b>I</b>          |
| DRB1*11:27                                                  | 11:27              |           |                                               | 0        | 0         | 32         | 0         | 0         | 0        | 0         | 32         |                                                      |           | WD        |           |          |     |           | WD        | WD                |
| DRB1*11:27:01                                               | 11:27:01           | HLA00781  |                                               | 0        | 6         | 406        | 0         | 3         | 0        | 7         | 422        |                                                      | WD        | I         |           |          |     | WD        | I         | I                 |
| DRB1*11:27:02                                               | 11:27:02           | HLA01213  |                                               | 0        | 0         | 26         | 1         | 1         | 0        | 3         | 31         |                                                      |           | WD        |           |          |     |           | WD        | WD                |
| DRB1*11:27:03                                               | 11:27:03           | HLA06513  |                                               | 1        | 0         | 0          | 0         | 8         | 0        | 2         | 11         |                                                      |           |           |           | I        |     |           | WD        | I                 |
| <b>DRB1*11:28 total</b>                                     | <b>11:28 total</b> |           |                                               | <b>6</b> | <b>24</b> | <b>584</b> | <b>5</b>  | <b>10</b> | <b>0</b> | <b>26</b> | <b>655</b> | <b>WD</b>                                            | <b>I</b>  | <b>I</b>  | <b>WD</b> | <b>I</b> |     | <b>I</b>  | <b>I</b>  | <b>I</b>          |
| DRB1*11:28                                                  | 11:28              |           |                                               | 1        | 1         | 22         | 1         | 2         | 0        | 2         | 29         |                                                      |           | WD        |           |          |     |           | WD        | WD                |
| DRB1*11:28:01                                               | 11:28:01           | HLA00782  |                                               | 5        | 17        | 561        | 4         | 8         | 0        | 24        | 619        | WD                                                   | I         | I         |           | I        |     | I         | I         | I                 |
| DRB1*11:28:02                                               | 11:28:02           | HLA03768  |                                               | 0        | 6         | 1          | 0         | 0         | 0        | 0         | 7          |                                                      | WD        |           |           |          |     |           | WD        | WD                |
| <b>DRB1*11:29 total</b>                                     | <b>11:29 total</b> |           |                                               | <b>5</b> | <b>35</b> | <b>332</b> | <b>10</b> | <b>4</b>  | <b>0</b> | <b>15</b> | <b>401</b> | <b>WD</b>                                            | <b>I</b>  | <b>I</b>  | <b>WD</b> |          |     | <b>I</b>  | <b>I</b>  | <b>I</b>          |
| DRB1*11:29                                                  | 11:29              |           |                                               | 2        | 8         | 170        | 5         | 3         | 0        | 5         | 193        |                                                      | WD        | I         | WD        |          |     |           | WD        | I                 |
| DRB1*11:29:01                                               | 11:29:01           | HLA00783  |                                               | 3        | 27        | 161        | 5         | 1         | 0        | 10        | 207        |                                                      | I         | I         | WD        |          |     |           | WD        | I                 |
| DRB1*11:29:02                                               | 11:29:02           | HLA13215  |                                               | 0        | 0         | 1          | 0         | 0         | 0        | 0         | 1          |                                                      |           |           |           |          |     |           |           |                   |
| DRB1*11:30                                                  | 11:30              | HLA00784  |                                               | 0        | 0         | 2          | 0         | 0         | 0        | 0         | 2          |                                                      |           |           |           |          |     |           |           |                   |
| DRB1*11:32                                                  | 11:32              | HLA00786  |                                               | 2        | 1         | 34         | 0         | 4         | 0        | 10        | 51         |                                                      |           | WD        |           |          |     |           | WD        | WD                |
| DRB1*11:33                                                  | 11:33              | HLA00787  |                                               | 0        | 0         | 11         | 4         | 0         | 0        | 2         | 17         |                                                      |           | WD        |           |          |     |           | WD        | WD                |
| DRB1*11:34                                                  | 11:34              | HLA00788  |                                               | 0        | 0         | 247        | 3         | 1         | 0        | 5         | 256        |                                                      |           | I         |           |          |     |           | WD        | I                 |
| DRB1*11:35                                                  | 11:35              | HLA01010  |                                               | 0        | 0         | 16         | 20        | 1         | 0        | 1         | 38         |                                                      |           | WD        | WD        |          |     |           | WD        | WD                |
| DRB1*11:36                                                  | 11:36              | HLA01090  |                                               | 2        | 8         | 262        | 9         | 3         | 1        | 19        | 304        |                                                      | WD        | I         | WD        |          |     |           | I         | I                 |
| <b>DRB1*11:37 total</b>                                     | <b>11:37 total</b> |           |                                               | <b>1</b> | <b>7</b>  | <b>80</b>  | <b>2</b>  | <b>1</b>  | <b>0</b> | <b>4</b>  | <b>95</b>  |                                                      | <b>WD</b> | <b>WD</b> |           |          |     |           | <b>WD</b> | <b>WD</b>         |
| DRB1*11:37                                                  | 11:37              |           |                                               | 0        | 1         | 11         | 0         | 0         | 0        | 3         | 15         |                                                      |           | WD        |           |          |     |           | WD        | WD                |
| DRB1*11:37:01                                               | 11:37:01           | HLA01156  |                                               | 0        | 6         | 69         | 0         | 1         | 0        | 1         | 77         |                                                      | WD        | WD        |           |          |     |           | WD        | WD                |
| DRB1*11:37:02                                               | 11:37:02           | HLA07163  |                                               | 1        | 0         | 0          | 2         | 0         | 0        | 0         | 3          |                                                      |           |           |           |          |     |           |           |                   |
| DRB1*11:38                                                  | 11:38              | HLA01239  |                                               | 0        | 0         | 1          | 0         | 0         | 0        | 0         | 1          |                                                      |           |           |           |          |     |           |           |                   |
| DRB1*11:39                                                  | 11:39              | HLA01273  |                                               | 3        | 2         | 230        | 2         | 4         | 0        | 21        | 262        |                                                      |           | I         |           |          |     |           | I         | I                 |
| DRB1*11:40                                                  | 11:40              | HLA01279  |                                               | 0        | 0         | 1          | 0         | 0         | 0        | 0         | 1          |                                                      |           |           |           |          |     |           |           |                   |
| DRB1*11:41                                                  | 11:41              | HLA01300  |                                               | 0        | 0         | 10         | 0         | 0         | 0        | 2         | 12         |                                                      |           | WD        |           |          |     |           | WD        | WD                |

| Supplemental Table 11: HLA-DRB1 Allele Summary <sup>a</sup> |                    |           | Allele Count by Population Group <sup>b</sup> |          |           |           |           |          |          |           |           | 3.0.0 CIWD Category by Population Group <sup>c</sup> |           |           |           |          |     |          |           |                   |
|-------------------------------------------------------------|--------------------|-----------|-----------------------------------------------|----------|-----------|-----------|-----------|----------|----------|-----------|-----------|------------------------------------------------------|-----------|-----------|-----------|----------|-----|----------|-----------|-------------------|
| Allele                                                      | Genomic Typing     | Allele ID | G group                                       | AFA      | API       | EURO      | MENA      | HIS      | NAM      | UNK       | Total     | AFA                                                  | API       | EURO      | MENA      | HIS      | NAM | UNK      | Total     | Highest Frequency |
| <b>DRB1*11:42 total</b>                                     | <b>11:42 total</b> |           |                                               | <b>0</b> | <b>0</b>  | <b>56</b> | <b>13</b> | <b>9</b> | <b>0</b> | <b>14</b> | <b>92</b> |                                                      |           | <b>WD</b> | <b>WD</b> | <b>I</b> |     | <b>I</b> | <b>WD</b> | <b>I</b>          |
| DRB1*11:42                                                  | 11:42              |           |                                               | 0        | 0         | 55        | 13        | 9        | 0        | 13        | 90        |                                                      |           | WD        | WD        | I        |     | WD       | WD        | I                 |
| DRB1*11:42:01                                               | 11:42:01           | HLA01447  |                                               | 0        | 0         | 1         | 0         | 0        | 0        | 1         | 2         |                                                      |           |           |           |          |     |          |           |                   |
| DRB1*11:43                                                  | 11:43              | HLA01552  |                                               | 1        | 0         | 600       | 0         | 8        | 0        | 21        | 630       |                                                      |           | I         |           | I        |     | I        | I         | I                 |
| DRB1*11:44                                                  | 11:44              | HLA01775  |                                               | 0        | 0         | 6         | 1         | 0        | 0        | 0         | 7         |                                                      |           | WD        |           |          |     |          | WD        | WD                |
| DRB1*11:45                                                  | 11:45              | HLA01779  |                                               | 1        | 1         | 2         | 0         | 7        | 0        | 0         | 11        |                                                      |           |           |           | WD       |     |          | WD        | WD                |
| <b>DRB1*11:46 total</b>                                     | <b>11:46 total</b> |           |                                               | <b>0</b> | <b>0</b>  | <b>1</b>  | <b>0</b>  | <b>1</b> | <b>0</b> | <b>0</b>  | <b>2</b>  |                                                      |           |           |           |          |     |          |           |                   |
| DRB1*11:46:01                                               | 11:46:01           | HLA01794  |                                               | 0        | 0         | 1         | 0         | 0        | 0        | 0         | 1         |                                                      |           |           |           |          |     |          |           |                   |
| DRB1*11:46:02                                               | 11:46:02           | HLA06137  |                                               | 0        | 0         | 0         | 0         | 1        | 0        | 0         | 1         |                                                      |           |           |           |          |     |          |           |                   |
| DRB1*11:47                                                  | 11:47              | HLA01812  |                                               | 4        | 2         | 4         | 1         | 25       | 11       | 10        | 57        |                                                      |           |           |           | I        | C   | WD       | WD        | C                 |
| DRB1*11:48                                                  | 11:48              | HLA01841  |                                               | 7        | 0         | 2         | 0         | 1        | 0        | 1         | 11        | WD                                                   |           |           |           |          |     |          | WD        | WD                |
| <b>DRB1*11:49 total</b>                                     | <b>11:49 total</b> |           |                                               | <b>2</b> | <b>1</b>  | <b>18</b> | <b>0</b>  | <b>0</b> | <b>0</b> | <b>2</b>  | <b>23</b> |                                                      |           | <b>WD</b> |           |          |     |          | <b>WD</b> | <b>WD</b>         |
| DRB1*11:49                                                  | 11:49              |           |                                               | 0        | 0         | 4         | 0         | 0        | 0        | 0         | 4         |                                                      |           |           |           |          |     |          |           |                   |
| DRB1*11:49:01                                               | 11:49:01           | HLA01848  |                                               | 0        | 1         | 14        | 0         | 0        | 0        | 2         | 17        |                                                      |           | WD        |           |          |     |          | WD        | WD                |
| DRB1*11:49:02                                               | 11:49:02           | HLA06510  |                                               | 2        | 0         | 0         | 0         | 0        | 0        | 0         | 2         |                                                      |           |           |           |          |     |          |           |                   |
| DRB1*11:51                                                  | 11:51              | HLA01901  |                                               | 0        | 0         | 2         | 0         | 2        | 0        | 2         | 6         |                                                      |           |           |           |          |     |          | WD        | WD                |
| DRB1*11:53                                                  | 11:53              | HLA01948  |                                               | 0        | 0         | 4         | 0         | 0        | 0        | 0         | 4         |                                                      |           |           |           |          |     |          |           |                   |
| <b>DRB1*11:54 total</b>                                     | <b>11:54 total</b> |           |                                               | <b>0</b> | <b>1</b>  | <b>1</b>  | <b>0</b>  | <b>0</b> | <b>0</b> | <b>1</b>  | <b>3</b>  |                                                      |           |           |           |          |     |          |           |                   |
| DRB1*11:54                                                  | 11:54              |           |                                               | 0        | 0         | 1         | 0         | 0        | 0        | 0         | 1         |                                                      |           |           |           |          |     |          |           |                   |
| DRB1*11:54:01                                               | 11:54:01           | HLA01968  |                                               | 0        | 1         | 0         | 0         | 0        | 0        | 1         | 2         |                                                      |           |           |           |          |     |          |           |                   |
| DRB1*11:56                                                  | 11:56              | HLA02577  |                                               | 0        | 0         | 29        | 1         | 1        | 0        | 1         | 32        |                                                      |           | WD        |           |          |     |          | WD        | WD                |
| DRB1*11:57                                                  | 11:57              | HLA02587  |                                               | 0        | 2         | 0         | 0         | 0        | 0        | 0         | 2         |                                                      |           |           |           |          |     |          |           |                   |
| <b>DRB1*11:58 total</b>                                     | <b>11:58 total</b> |           |                                               | <b>0</b> | <b>0</b>  | <b>49</b> | <b>3</b>  | <b>0</b> | <b>0</b> | <b>3</b>  | <b>55</b> |                                                      |           | <b>WD</b> |           |          |     |          | <b>WD</b> | <b>WD</b>         |
| DRB1*11:58                                                  | 11:58              |           |                                               | 0        | 0         | 5         | 0         | 0        | 0        | 0         | 5         |                                                      |           | WD        |           |          |     |          | WD        | WD                |
| DRB1*11:58:01                                               | 11:58:01           | HLA02718  |                                               | 0        | 0         | 38        | 2         | 0        | 0        | 2         | 42        |                                                      |           | WD        |           |          |     |          | WD        | WD                |
| DRB1*11:58:02                                               | 11:58:02           | HLA04666  |                                               | 0        | 0         | 6         | 1         | 0        | 0        | 1         | 8         |                                                      |           | WD        |           |          |     |          | WD        | WD                |
| DRB1*11:60                                                  | 11:60              | HLA02720  |                                               | 0        | 0         | 4         | 0         | 0        | 0        | 1         | 5         |                                                      |           |           |           |          |     |          | WD        | WD                |
| DRB1*11:61                                                  | 11:61              | HLA02841  |                                               | 0        | 0         | 7         | 0         | 0        | 0        | 0         | 7         |                                                      |           | WD        |           |          |     |          | WD        | WD                |
| <b>DRB1*11:62 total</b>                                     | <b>11:62 total</b> |           |                                               | <b>0</b> | <b>10</b> | <b>4</b>  | <b>0</b>  | <b>0</b> | <b>0</b> | <b>0</b>  | <b>14</b> |                                                      | <b>WD</b> |           |           |          |     |          | <b>WD</b> | <b>WD</b>         |
| DRB1*11:62                                                  | 11:62              |           |                                               | 0        | 1         | 2         | 0         | 0        | 0        | 0         | 3         |                                                      |           |           |           |          |     |          |           |                   |
| DRB1*11:62:01                                               | 11:62:01           | HLA02856  |                                               | 0        | 9         | 2         | 0         | 0        | 0        | 0         | 11        |                                                      | WD        |           |           |          |     |          | WD        | WD                |

| Supplemental Table 11: HLA-DRB1 Allele Summary <sup>a</sup> |                     |           | Allele Count by Population Group <sup>b</sup> |     |     |      |      |     |     |     |       | 3.0.0 CIWD Category by Population Group <sup>c</sup> |     |      |      |     |     |     |       |                   |
|-------------------------------------------------------------|---------------------|-----------|-----------------------------------------------|-----|-----|------|------|-----|-----|-----|-------|------------------------------------------------------|-----|------|------|-----|-----|-----|-------|-------------------|
| Allele                                                      | Genomic Typing      | Allele ID | G group                                       | AFA | API | EURO | MENA | HIS | NAM | UNK | Total | AFA                                                  | API | EURO | MENA | HIS | NAM | UNK | Total | Highest Frequency |
| <b>DRB1*11:65 total</b>                                     | <b>11:65 total</b>  |           |                                               | 9   | 0   | 0    | 0    | 0   | 0   | 3   | 12    | WD                                                   |     |      |      |     |     |     | WD    | WD                |
| DRB1*11:65:01                                               | 11:65:01            | HLA03068  |                                               | 9   | 0   | 0    | 0    | 0   | 0   | 3   | 12    | WD                                                   |     |      |      |     |     |     | WD    | WD                |
| DRB1*11:66                                                  | 11:66               | HLA03072  |                                               | 0   | 202 | 4    | 0    | 0   | 0   | 2   | 208   |                                                      | C   |      |      |     |     |     | I     | C                 |
| DRB1*11:68                                                  | 11:68               | HLA03207  |                                               | 0   | 0   | 0    | 0    | 0   | 0   | 1   | 1     |                                                      |     |      |      |     |     |     |       |                   |
| DRB1*11:69                                                  | 11:69               | HLA03385  |                                               | 1   | 0   | 45   | 1    | 0   | 0   | 1   | 48    |                                                      |     | WD   |      |     |     |     | WD    | WD                |
| DRB1*11:73                                                  | 11:73               | HLA03779  |                                               | 0   | 0   | 1    | 0    | 0   | 0   | 0   | 1     |                                                      |     |      |      |     |     |     |       |                   |
| <b>DRB1*11:74 total</b>                                     | <b>11:74 total</b>  |           |                                               | 0   | 0   | 1    | 0    | 0   | 0   | 0   | 1     |                                                      |     |      |      |     |     |     |       |                   |
| DRB1*11:74:01                                               | 11:74:01            | HLA03846  |                                               | 0   | 0   | 1    | 0    | 0   | 0   | 0   | 1     |                                                      |     |      |      |     |     |     |       |                   |
| DRB1*11:76                                                  | 11:76               | HLA03853  |                                               | 0   | 0   | 66   | 0    | 1   | 0   | 0   | 67    |                                                      |     | WD   |      |     |     |     | WD    | WD                |
| DRB1*11:78                                                  | 11:78               | HLA03856  |                                               | 0   | 0   | 21   | 0    | 0   | 0   | 0   | 21    |                                                      |     | WD   |      |     |     |     | WD    | WD                |
| DRB1*11:79                                                  | 11:79               | HLA03866  |                                               | 0   | 0   | 1    | 0    | 0   | 0   | 0   | 1     |                                                      |     |      |      |     |     |     |       |                   |
| DRB1*11:81                                                  | 11:81               | HLA03913  |                                               | 0   | 0   | 2    | 13   | 0   | 0   | 0   | 15    |                                                      |     |      | WD   |     |     |     | WD    | WD                |
| DRB1*11:83                                                  | 11:83               | HLA04032  |                                               | 0   | 0   | 0    | 0    | 1   | 0   | 0   | 1     |                                                      |     |      |      |     |     |     |       |                   |
| <b>DRB1*11:84 total</b>                                     | <b>11:84 total</b>  |           |                                               | 0   | 0   | 21   | 0    | 9   | 0   | 4   | 34    |                                                      |     | WD   |      | I   |     |     | WD    | I                 |
| DRB1*11:84                                                  | 11:84               |           |                                               | 0   | 0   | 5    | 0    | 2   | 0   | 1   | 8     |                                                      |     | WD   |      |     |     |     | WD    | WD                |
| DRB1*11:84:01                                               | 11:84:01            | HLA04034  |                                               | 0   | 0   | 8    | 0    | 7   | 0   | 2   | 17    |                                                      |     | WD   |      | WD  |     |     | WD    | WD                |
| DRB1*11:84:02                                               | 11:84:02            | HLA07516  |                                               | 0   | 0   | 8    | 0    | 0   | 0   | 1   | 9     |                                                      |     | WD   |      |     |     |     | WD    | WD                |
| DRB1*11:85                                                  | 11:85               | HLA04400  |                                               | 0   | 0   | 1    | 0    | 1   | 0   | 1   | 3     |                                                      |     |      |      |     |     |     |       |                   |
| DRB1*11:86                                                  | 11:86               | HLA04404  |                                               | 2   | 0   | 0    | 0    | 0   | 0   | 0   | 2     |                                                      |     |      |      |     |     |     |       |                   |
| DRB1*11:88                                                  | 11:88               | HLA04615  |                                               | 0   | 0   | 10   | 0    | 0   | 0   | 0   | 10    |                                                      |     | WD   |      |     |     |     | WD    | WD                |
| DRB1*11:90                                                  | 11:90               | HLA04678  |                                               | 0   | 0   | 1    | 0    | 0   | 0   | 0   | 1     |                                                      |     |      |      |     |     |     |       |                   |
| DRB1*11:92                                                  | 11:92               | HLA04688  |                                               | 0   | 3   | 0    | 0    | 0   | 0   | 0   | 3     |                                                      |     |      |      |     |     |     |       |                   |
| DRB1*11:93                                                  | 11:93               | HLA04721  |                                               | 0   | 0   | 2    | 0    | 1   | 1   | 2   | 6     |                                                      |     |      |      |     |     |     | WD    | WD                |
| DRB1*11:94                                                  | 11:94               | HLA04776  |                                               | 0   | 0   | 6    | 0    | 0   | 0   | 0   | 6     |                                                      |     | WD   |      |     |     |     | WD    | WD                |
| DRB1*11:96                                                  | 11:96               | HLA05379  |                                               | 0   | 1   | 3    | 2    | 0   | 0   | 0   | 6     |                                                      |     |      |      |     |     |     | WD    | WD                |
| DRB1*11:98                                                  | 11:98               | HLA05759  |                                               | 2   | 0   | 0    | 0    | 0   | 0   | 0   | 2     |                                                      |     |      |      |     |     |     |       |                   |
| DRB1*11:99                                                  | 11:99               | HLA05973  |                                               | 0   | 0   | 6    | 0    | 0   | 0   | 0   | 6     |                                                      |     | WD   |      |     |     |     | WD    | WD                |
| <b>DRB1*11:101 total</b>                                    | <b>11:101 total</b> |           |                                               | 0   | 5   | 1    | 0    | 0   | 0   | 0   | 6     |                                                      | WD  |      |      |     |     |     | WD    | WD                |
| DRB1*11:101                                                 | 11:101              |           |                                               | 0   | 0   | 1    | 0    | 0   | 0   | 0   | 1     |                                                      |     |      |      |     |     |     |       |                   |
| DRB1*11:101:01                                              | 11:101:01           | HLA06039  |                                               | 0   | 2   | 0    | 0    | 0   | 0   | 0   | 2     |                                                      |     |      |      |     |     |     |       |                   |
| DRB1*11:101:02                                              | 11:101:02           | HLA14571  |                                               | 0   | 3   | 0    | 0    | 0   | 0   | 0   | 3     |                                                      |     |      |      |     |     |     |       |                   |

| Supplemental Table 11: HLA-DRB1 Allele Summary <sup>a</sup> |                     |           | Allele Count by Population Group <sup>b</sup> |     |     |      |      |     |     |     |       | 3.0.0 CIWD Category by Population Group <sup>c</sup> |     |      |      |     |     |     |       |                   |
|-------------------------------------------------------------|---------------------|-----------|-----------------------------------------------|-----|-----|------|------|-----|-----|-----|-------|------------------------------------------------------|-----|------|------|-----|-----|-----|-------|-------------------|
| Allele                                                      | Genomic Typing      | Allele ID | G group                                       | AFA | API | EURO | MENA | HIS | NAM | UNK | Total | AFA                                                  | API | EURO | MENA | HIS | NAM | UNK | Total | Highest Frequency |
| <b>DRB1*11:102 total</b>                                    | <b>11:102 total</b> |           |                                               | 0   | 0   | 3    | 0    | 0   | 0   | 1   | 4     |                                                      |     |      |      |     |     |     |       |                   |
| DRB1*11:102:02                                              | 11:102:02           | HLA07346  |                                               | 0   | 0   | 3    | 0    | 0   | 0   | 1   | 4     |                                                      |     |      |      |     |     |     |       |                   |
| <b>DRB1*11:103 total</b>                                    | <b>11:103 total</b> |           |                                               | 1   | 1   | 11   | 0    | 0   | 0   | 0   | 13    |                                                      |     | WD   |      |     |     |     | WD    | WD                |
| DRB1*11:103                                                 | 11:103              |           |                                               | 1   | 0   | 10   | 0    | 0   | 0   | 0   | 11    |                                                      |     | WD   |      |     |     |     | WD    | WD                |
| DRB1*11:103:01                                              | 11:103:01           | HLA06482  |                                               | 0   | 1   | 1    | 0    | 0   | 0   | 0   | 2     |                                                      |     |      |      |     |     |     |       |                   |
| DRB1*11:104                                                 | 11:104              | HLA06501  |                                               | 0   | 0   | 16   | 0    | 0   | 0   | 0   | 16    |                                                      |     | WD   |      |     |     |     | WD    | WD                |
| DRB1*11:105                                                 | 11:105              | HLA06511  |                                               | 0   | 0   | 1    | 0    | 0   | 0   | 1   | 2     |                                                      |     |      |      |     |     |     |       |                   |
| DRB1*11:106                                                 | 11:106              | HLA06521  |                                               | 0   | 2   | 0    | 0    | 0   | 0   | 0   | 2     |                                                      |     |      |      |     |     |     |       |                   |
| DRB1*11:108                                                 | 11:108              | HLA06667  |                                               | 0   | 0   | 3    | 0    | 0   | 0   | 1   | 4     |                                                      |     |      |      |     |     |     |       |                   |
| DRB1*11:111                                                 | 11:111              | HLA06860  |                                               | 0   | 1   | 0    | 0    | 0   | 0   | 0   | 1     |                                                      |     |      |      |     |     |     |       |                   |
| DRB1*11:113                                                 | 11:113              | HLA06773  |                                               | 0   | 0   | 8    | 2    | 0   | 0   | 6   | 16    |                                                      |     | WD   |      |     |     | WD  | WD    | WD                |
| DRB1*11:117                                                 | 11:117              | HLA07247  |                                               | 0   | 2   | 0    | 0    | 0   | 0   | 0   | 2     |                                                      |     |      |      |     |     |     |       |                   |
| DRB1*11:118                                                 | 11:118              | HLA07260  |                                               | 0   | 3   | 0    | 0    | 0   | 0   | 0   | 3     |                                                      |     |      |      |     |     |     |       |                   |
| DRB1*11:120                                                 | 11:120              | HLA07328  |                                               | 0   | 0   | 1    | 0    | 0   | 0   | 0   | 1     |                                                      |     |      |      |     |     |     |       |                   |
| DRB1*11:122                                                 | 11:122              | HLA07511  |                                               | 0   | 0   | 2    | 0    | 0   | 0   | 0   | 2     |                                                      |     |      |      |     |     |     |       |                   |
| DRB1*11:124                                                 | 11:124              | HLA07515  |                                               | 0   | 0   | 2    | 0    | 0   | 0   | 0   | 2     |                                                      |     |      |      |     |     |     |       |                   |
| DRB1*11:125                                                 | 11:125              | HLA07517  |                                               | 0   | 0   | 23   | 0    | 0   | 0   | 0   | 23    |                                                      |     | WD   |      |     |     |     | WD    | WD                |
| DRB1*11:128                                                 | 11:128              | HLA07882  |                                               | 0   | 0   | 7    | 0    | 0   | 0   | 1   | 8     |                                                      |     | WD   |      |     |     |     | WD    | WD                |
| DRB1*11:132                                                 | 11:132              | HLA08551  |                                               | 1   | 0   | 0    | 0    | 0   | 0   | 0   | 1     |                                                      |     |      |      |     |     |     |       |                   |
| DRB1*11:136                                                 | 11:136              | HLA08868  |                                               | 0   | 0   | 1    | 0    | 0   | 0   | 0   | 1     |                                                      |     |      |      |     |     |     |       |                   |
| DRB1*11:137                                                 | 11:137              | HLA08869  |                                               | 0   | 0   | 15   | 0    | 0   | 0   | 0   | 15    |                                                      |     | WD   |      |     |     |     | WD    | WD                |
| DRB1*11:138                                                 | 11:138              | HLA08870  |                                               | 0   | 0   | 1    | 0    | 0   | 0   | 0   | 1     |                                                      |     |      |      |     |     |     |       |                   |
| DRB1*11:142                                                 | 11:142              | HLA09080  |                                               | 0   | 0   | 0    | 0    | 0   | 0   | 1   | 1     |                                                      |     |      |      |     |     |     |       |                   |
| DRB1*11:143                                                 | 11:143              | HLA09122  |                                               | 0   | 1   | 0    | 0    | 0   | 0   | 0   | 1     |                                                      |     |      |      |     |     |     |       |                   |
| DRB1*11:144                                                 | 11:144              | HLA09216  |                                               | 1   | 0   | 0    | 0    | 0   | 0   | 0   | 1     |                                                      |     |      |      |     |     |     |       |                   |
| DRB1*11:145                                                 | 11:145              | HLA09304  |                                               | 0   | 0   | 0    | 7    | 0   | 0   | 0   | 7     |                                                      |     |      | WD   |     |     |     | WD    | WD                |
| <b>DRB1*11:147 total</b>                                    | <b>11:147 total</b> |           |                                               | 0   | 0   | 0    | 1    | 0   | 0   | 0   | 1     |                                                      |     |      |      |     |     |     |       |                   |
| DRB1*11:147                                                 | 11:147              |           |                                               | 0   | 0   | 0    | 1    | 0   | 0   | 0   | 1     |                                                      |     |      |      |     |     |     |       |                   |
| DRB1*11:148                                                 | 11:148              | HLA09916  |                                               | 0   | 0   | 0    | 0    | 0   | 0   | 1   | 1     |                                                      |     |      |      |     |     |     |       |                   |
| DRB1*11:150                                                 | 11:150              | HLA10318  |                                               | 0   | 0   | 1    | 0    | 0   | 0   | 0   | 1     |                                                      |     |      |      |     |     |     |       |                   |
| DRB1*11:152                                                 | 11:152              | HLA10320  |                                               | 0   | 0   | 2    | 0    | 0   | 0   | 0   | 2     |                                                      |     |      |      |     |     |     |       |                   |

| Supplemental Table 11: HLA-DRB1 Allele Summary <sup>a</sup> |                        |           | Allele Count by Population Group <sup>b</sup> |              |              |               |             |             |            |              |               | 3.0.0 CIWD Category by Population Group <sup>c</sup> |          |          |          |          |          |          |          |                   |
|-------------------------------------------------------------|------------------------|-----------|-----------------------------------------------|--------------|--------------|---------------|-------------|-------------|------------|--------------|---------------|------------------------------------------------------|----------|----------|----------|----------|----------|----------|----------|-------------------|
| Allele                                                      | Genomic Typing         | Allele ID | G group                                       | AFA          | API          | EURO          | MENA        | HIS         | NAM        | UNK          | Total         | AFA                                                  | API      | EURO     | MENA     | HIS      | NAM      | UNK      | Total    | Highest Frequency |
| DRB1*11:154                                                 | 11:154                 | HLA11060  |                                               | 0            | 1            | 0             | 0           | 0           | 0          | 0            | 1             |                                                      |          |          |          |          |          |          |          |                   |
| DRB1*11:155                                                 | 11:155                 | HLA11171  |                                               | 0            | 0            | 0             | 0           | 0           | 0          | 1            | 1             |                                                      |          |          |          |          |          |          |          |                   |
| DRB1*11:161                                                 | 11:161                 | HLA11744  |                                               | 0            | 0            | 2             | 0           | 0           | 0          | 0            | 2             |                                                      |          |          |          |          |          |          |          |                   |
| DRB1*11:162                                                 | 11:162                 | HLA11746  |                                               | 0            | 0            | 1             | 0           | 0           | 0          | 0            | 1             |                                                      |          |          |          |          |          |          |          |                   |
| DRB1*11:173                                                 | 11:173                 | HLA12838  |                                               | 0            | 0            | 1             | 0           | 0           | 0          | 0            | 1             |                                                      |          |          |          |          |          |          |          |                   |
| DRB1*11:175                                                 | 11:175                 | HLA12840  |                                               | 0            | 0            | 2             | 0           | 1           | 0          | 1            | 4             |                                                      |          |          |          |          |          |          |          |                   |
| DRB1*11:179                                                 | 11:179                 | HLA13288  |                                               | 0            | 0            | 0             | 5           | 0           | 0          | 0            | 5             |                                                      |          |          | WD       |          |          |          | WD       | WD                |
| DRB1*11:185                                                 | 11:185                 | HLA13821  |                                               | 0            | 0            | 1             | 0           | 0           | 0          | 0            | 1             |                                                      |          |          |          |          |          |          |          |                   |
| DRB1*11:189                                                 | 11:189                 | HLA14053  |                                               | 0            | 0            | 0             | 1           | 0           | 0          | 0            | 1             |                                                      |          |          |          |          |          |          |          |                   |
| <b>DRB1*11:193 total</b>                                    | <b>11:193 total</b>    |           |                                               | <b>0</b>     | <b>0</b>     | <b>1</b>      | <b>0</b>    | <b>0</b>    | <b>0</b>   | <b>0</b>     | <b>1</b>      |                                                      |          |          |          |          |          |          |          |                   |
| DRB1*11:193:01                                              | 11:193:01              | HLA14182  |                                               | 0            | 0            | 1             | 0           | 0           | 0          | 0            | 1             |                                                      |          |          |          |          |          |          |          |                   |
| DRB1*11:194                                                 | 11:194                 | HLA14186  |                                               | 0            | 0            | 0             | 0           | 1           | 0          | 0            | 1             |                                                      |          |          |          |          |          |          |          |                   |
| DRB1*11:196                                                 | 11:196                 | HLA14421  |                                               | 0            | 0            | 1             | 0           | 0           | 0          | 0            | 1             |                                                      |          |          |          |          |          |          |          |                   |
| DRB1*11:197                                                 | 11:197                 | HLA14572  |                                               | 0            | 0            | 1             | 0           | 0           | 0          | 0            | 1             |                                                      |          |          |          |          |          |          |          |                   |
| DRB1*11:200                                                 | 11:200                 | HLA15006  |                                               | 0            | 0            | 0             | 0           | 0           | 0          | 1            | 1             |                                                      |          |          |          |          |          |          |          |                   |
| DRB1*11:205                                                 | 11:205                 | HLA15707  |                                               | 0            | 1            | 0             | 0           | 0           | 0          | 0            | 1             |                                                      |          |          |          |          |          |          |          |                   |
| DRB1*11:217N                                                | 11:217N                | HLA17534  |                                               | 0            | 0            | 1             | 0           | 0           | 0          | 0            | 1             |                                                      |          |          |          |          |          |          |          |                   |
| DRB1*11:CODE                                                | 11:CODE                |           |                                               | 2782         | 1335         | 44556         | 1483        | 3143        | 173        | 4997         | 58469         | NA                                                   | NA       | NA       | NA       | NA       | NA       | NA       | NA       | NA                |
| <b>DRB1*12:01 total</b>                                     | <b>12:01 total</b>     |           |                                               | <b>13148</b> | <b>14410</b> | <b>223297</b> | <b>5173</b> | <b>7451</b> | <b>982</b> | <b>24372</b> | <b>288833</b> | <b>C</b>                                             | <b>C</b> | <b>C</b> | <b>C</b> | <b>C</b> | <b>C</b> | <b>C</b> | <b>C</b> | <b>C</b>          |
| DRB1*12:01                                                  | 12:01                  |           |                                               | 1            | 0            | 888           | 3           | 6           | 0          | 34           | 932           |                                                      |          | I        |          | WD       |          | I        | I        | I                 |
| DRB1*12:01P                                                 | 12:01P                 |           |                                               | 8            | 1            | 208           | 0           | 2           | 0          | 1            | 220           | WD                                                   |          | I        |          |          |          |          | I        | I                 |
| <b>DRB1*12:01:01G total</b>                                 | <b>12:01:01G total</b> |           |                                               | <b>13139</b> | <b>14406</b> | <b>222183</b> | <b>5167</b> | <b>7442</b> | <b>982</b> | <b>24335</b> | <b>287654</b> | <b>C</b>                                             | <b>C</b> | <b>C</b> | <b>C</b> | <b>C</b> | <b>C</b> | <b>C</b> | <b>C</b> | <b>C</b>          |
| DRB1*12:01:01G                                              | 12:01:01G              |           | 12:01:01G                                     | 13082        | 14374        | 222036        | 5166        | 7402        | 979        | 24286        | 287325        | C                                                    | C        | C        | C        | C        | C        | C        | C        | C                 |
| DRB1*12:01:01                                               | 12:01:01               |           | 12:01:01G                                     | 6            | 19           | 23            | 0           | 7           | 1          | 23           | 79            | WD                                                   | I        | WD       |          | WD       |          | I        | WD       | I                 |
| DRB1*12:01:01:01                                            | 12:01:01:01            | HLA00789  | 12:01:01G                                     | 50           | 8            | 1             | 0           | 17          | 2          | 20           | 98            | C                                                    | WD       |          |          | I        |          | I        | WD       | C                 |
| DRB1*12:01:01:03                                            | 12:01:01:03            | HLA14832  | 12:01:01G                                     | 1            | 4            | 117           | 1           | 16          | 0          | 6            | 145           |                                                      |          | WD       |          | I        |          | WD       | WD       | I                 |
| DRB1*12:17                                                  | 12:17                  | HLA03485  | 12:01:01G                                     | 0            | 1            | 6             | 0           | 0           | 0          | 0            | 7             |                                                      |          | WD       |          |          |          |          | WD       | WD                |
| DRB1*12:01:02                                               | 12:01:02               | HLA01407  |                                               | 0            | 1            | 12            | 3           | 0           | 0          | 1            | 17            |                                                      |          | WD       |          |          |          |          | WD       | WD                |
| DRB1*12:01:03                                               | 12:01:03               | HLA04352  |                                               | 0            | 1            | 5             | 0           | 1           | 0          | 0            | 7             |                                                      |          | WD       |          |          |          |          | WD       | WD                |
| DRB1*12:01:05                                               | 12:01:05               | HLA09462  |                                               | 0            | 1            | 0             | 0           | 0           | 0          | 1            | 2             |                                                      |          |          |          |          |          |          |          |                   |
| DRB1*12:01:09                                               | 12:01:09               | HLA13274  |                                               | 0            | 0            | 1             | 0           | 0           | 0          | 0            | 1             |                                                      |          |          |          |          |          |          |          |                   |

| Supplemental Table 11: HLA-DRB1 Allele Summary <sup>a</sup> |                        |           | Allele Count by Population Group <sup>b</sup> |              |              |               |              |              |             |              |               | 3.0.0 CIWD Category by Population Group <sup>c</sup> |          |          |          |          |          |          |          |                   |
|-------------------------------------------------------------|------------------------|-----------|-----------------------------------------------|--------------|--------------|---------------|--------------|--------------|-------------|--------------|---------------|------------------------------------------------------|----------|----------|----------|----------|----------|----------|----------|-------------------|
| Allele                                                      | Genomic Typing         | Allele ID | G group                                       | AFA          | API          | EURO          | MENA         | HIS          | NAM         | UNK          | Total         | AFA                                                  | API      | EURO     | MENA     | HIS      | NAM      | UNK      | Total    | Highest Frequency |
| <b>DRB1*12:02 total</b>                                     | <b>12:02 total</b>     |           |                                               | <b>1000</b>  | <b>70680</b> | <b>3135</b>   | <b>658</b>   | <b>709</b>   | <b>136</b>  | <b>6242</b>  | <b>82560</b>  | <b>C</b>                                             | <b>C</b> | <b>C</b> | <b>C</b> | <b>C</b> | <b>C</b> | <b>C</b> | <b>C</b> | <b>C</b>          |
| DRB1*12:02                                                  | 12:02                  |           |                                               | 103          | 3314         | 97            | 23           | 78           | 10          | 513          | 4138          | C                                                    | C        | WD       | WD       | C        | C        | C        | C        | C                 |
| <b>DRB1*12:02:01G total</b>                                 | <b>12:02:01G total</b> |           |                                               | <b>620</b>   | <b>67359</b> | <b>3017</b>   | <b>628</b>   | <b>553</b>   | <b>95</b>   | <b>5646</b>  | <b>77918</b>  | <b>C</b>                                             | <b>C</b> | <b>C</b> | <b>C</b> | <b>C</b> | <b>C</b> | <b>C</b> | <b>C</b> | <b>C</b>          |
| DRB1*12:02:01G                                              | 12:02:01G              |           | 12:02:01G                                     | 9            | 21272        | 167           | 11           | 4            | 0           | 47           | 21510         | WD                                                   | C        | I        | WD       |          |          | I        | C        | C                 |
| DRB1*12:02:01                                               | 12:02:01               |           | 12:02:01G                                     | 611          | 46087        | 2850          | 617          | 549          | 95          | 5599         | 56408         | C                                                    | C        | C        | C        | C        | C        | C        | C        | C                 |
| DRB1*12:02:02                                               | 12:02:02               | HLA00791  |                                               | 277          | 7            | 21            | 7            | 78           | 31          | 83           | 504           | C                                                    | WD       | WD       | WD       | C        | C        | I        | I        | C                 |
| <b>DRB1*12:03 total</b>                                     | <b>12:03 total</b>     |           |                                               | <b>0</b>     | <b>1</b>     | <b>125</b>    | <b>0</b>     | <b>0</b>     | <b>1</b>    | <b>36</b>    | <b>163</b>    |                                                      |          | <b>I</b> |          |          |          | <b>I</b> | <b>I</b> | <b>I</b>          |
| DRB1*12:03                                                  | 12:03                  |           |                                               | 0            | 0            | 7             | 0            | 0            | 0           | 2            | 9             |                                                      |          | WD       |          |          |          |          | WD       | WD                |
| DRB1*12:03:02                                               | 12:03:02               | HLA00793  |                                               | 0            | 1            | 115           | 0            | 0            | 1           | 34           | 151           |                                                      |          | WD       |          |          |          | I        | WD       | I                 |
| DRB1*12:03:03                                               | 12:03:03               | HLA08114  |                                               | 0            | 0            | 3             | 0            | 0            | 0           | 0            | 3             |                                                      |          |          |          |          |          |          |          |                   |
| DRB1*12:04                                                  | 12:04                  | HLA00794  |                                               | 20           | 0            | 3             | 0            | 2            | 1           | 8            | 34            | WD                                                   |          |          |          |          |          | WD       | WD       | WD                |
| DRB1*12:05                                                  | 12:05                  | HLA00795  |                                               | 0            | 13           | 5             | 0            | 0            | 0           | 3            | 21            |                                                      | WD       | WD       |          |          |          |          | WD       | WD                |
| DRB1*12:07                                                  | 12:07                  | HLA01361  |                                               | 0            | 0            | 2             | 0            | 0            | 0           | 0            | 2             |                                                      |          |          |          |          |          |          |          |                   |
| DRB1*12:08                                                  | 12:08                  | HLA01480  |                                               | 0            | 10           | 1             | 0            | 0            | 0           | 1            | 12            |                                                      | WD       |          |          |          |          |          | WD       | WD                |
| DRB1*12:09                                                  | 12:09                  | HLA01806  |                                               | 1            | 2            | 0             | 0            | 0            | 0           | 0            | 3             |                                                      |          |          |          |          |          |          |          |                   |
| DRB1*12:11                                                  | 12:11                  | HLA02055  |                                               | 0            | 0            | 40            | 0            | 1            | 0           | 0            | 41            |                                                      |          | WD       |          |          |          |          | WD       | WD                |
| DRB1*12:15                                                  | 12:15                  | HLA02583  |                                               | 0            | 1            | 0             | 0            | 0            | 0           | 0            | 1             |                                                      |          |          |          |          |          |          |          |                   |
| <b>DRB1*12:16 total</b>                                     | <b>12:16 total</b>     |           |                                               | <b>0</b>     | <b>1</b>     | <b>0</b>      | <b>0</b>     | <b>0</b>     | <b>0</b>    | <b>0</b>     | <b>1</b>      |                                                      |          |          |          |          |          |          |          |                   |
| DRB1*12:16:01                                               | 12:16:01               | HLA02988  |                                               | 0            | 1            | 0             | 0            | 0            | 0           | 0            | 1             |                                                      |          |          |          |          |          |          |          |                   |
| DRB1*12:19                                                  | 12:19                  | HLA03604  |                                               | 0            | 1            | 0             | 0            | 0            | 0           | 0            | 1             |                                                      |          |          |          |          |          |          |          |                   |
| DRB1*12:20                                                  | 12:20                  | HLA03997  |                                               | 0            | 6            | 0             | 0            | 0            | 0           | 1            | 7             |                                                      | WD       |          |          |          |          |          | WD       | WD                |
| DRB1*12:24N                                                 | 12:24N                 | HLA05372  |                                               | 0            | 0            | 27            | 0            | 0            | 0           | 10           | 37            |                                                      |          | WD       |          |          |          | WD       | WD       | WD                |
| DRB1*12:25                                                  | 12:25                  | HLA05561  |                                               | 26           | 0            | 2             | 0            | 0            | 0           | 6            | 34            | WD                                                   |          |          |          |          |          | WD       | WD       | WD                |
| DRB1*12:27                                                  | 12:27                  | HLA06591  |                                               | 0            | 3            | 0             | 0            | 0            | 0           | 0            | 3             |                                                      |          |          |          |          |          |          |          |                   |
| DRB1*12:34                                                  | 12:34                  | HLA06878  |                                               | 0            | 0            | 3             | 0            | 1            | 0           | 0            | 4             |                                                      |          |          |          |          |          |          |          |                   |
| DRB1*12:48                                                  | 12:48                  | HLA11751  |                                               | 0            | 0            | 8             | 0            | 0            | 0           | 1            | 9             |                                                      |          | WD       |          |          |          |          | WD       | WD                |
| DRB1*12:52                                                  | 12:52                  | HLA12594  |                                               | 0            | 1            | 0             | 0            | 0            | 0           | 0            | 1             |                                                      |          |          |          |          |          |          |          |                   |
| DRB1*12:53                                                  | 12:53                  | HLA12820  |                                               | 0            | 0            | 1             | 0            | 0            | 0           | 0            | 1             |                                                      |          |          |          |          |          |          |          |                   |
| DRB1*12:58                                                  | 12:58                  | HLA13491  |                                               | 0            | 0            | 1             | 0            | 0            | 0           | 0            | 1             |                                                      |          |          |          |          |          |          |          |                   |
| DRB1*12:CODE                                                | 12:CODE                |           |                                               | 403          | 981          | 3712          | 18           | 376          | 30          | 485          | 6005          | NA                                                   | NA       | NA       | NA       | NA       | NA       | NA       | NA       | NA                |
| <b>DRB1*13:01 total</b>                                     | <b>13:01 total</b>     |           |                                               | <b>20540</b> | <b>67942</b> | <b>779925</b> | <b>20293</b> | <b>30448</b> | <b>3288</b> | <b>71206</b> | <b>993642</b> | <b>C</b>                                             | <b>C</b> | <b>C</b> | <b>C</b> | <b>C</b> | <b>C</b> | <b>C</b> | <b>C</b> | <b>C</b>          |

| Supplemental Table 11: HLA-DRB1 Allele Summary <sup>a</sup> |                        |           | Allele Count by Population Group <sup>b</sup> |              |              |               |              |              |             |              |               | 3.0.0 CIWD Category by Population Group <sup>c</sup> |          |          |          |          |          |          |          |                   |
|-------------------------------------------------------------|------------------------|-----------|-----------------------------------------------|--------------|--------------|---------------|--------------|--------------|-------------|--------------|---------------|------------------------------------------------------|----------|----------|----------|----------|----------|----------|----------|-------------------|
| Allele                                                      | Genomic Typing         | Allele ID | G group                                       | AFA          | API          | EURO          | MENA         | HIS          | NAM         | UNK          | Total         | AFA                                                  | API      | EURO     | MENA     | HIS      | NAM      | UNK      | Total    | Highest Frequency |
| DRB1*13:01                                                  | 13:01                  |           |                                               | 53           | 9            | 4267          | 20           | 33           | 4           | 238          | 4624          | C                                                    | WD       | C        | WD       | I        |          | C        | C        | C                 |
| DRB1*13:01P                                                 | 13:01P                 |           |                                               | 3            | 8            | 700           | 3            | 1            | 0           | 1            | 716           |                                                      | WD       | I        |          |          |          |          | I        | I                 |
| <b>DRB1*13:01:01G total</b>                                 | <b>13:01:01G total</b> |           |                                               | <b>20435</b> | <b>67631</b> | <b>774941</b> | <b>20270</b> | <b>30412</b> | <b>3284</b> | <b>70953</b> | <b>987926</b> | <b>C</b>                                             | <b>C</b> | <b>C</b> | <b>C</b> | <b>C</b> | <b>C</b> | <b>C</b> | <b>C</b> | <b>C</b>          |
| DRB1*13:01:01G                                              | 13:01:01G              |           | 13:01:01G                                     | 10300        | 47355        | 171322        | 7744         | 17423        | 1820        | 49972        | 305936        | C                                                    | C        | C        | C        | C        | C        | C        | C        | C                 |
| DRB1*13:01:01                                               | 13:01:01               |           | 13:01:01G                                     | 10106        | 20149        | 602128        | 12492        | 12752        | 1437        | 20818        | 679882        | C                                                    | C        | C        | C        | C        | C        | C        | C        | C                 |
| DRB1*13:01:01:01                                            | 13:01:01:01            | HLA00797  | 13:01:01G                                     | 18           | 118          | 837           | 31           | 134          | 14          | 92           | 1244          | WD                                                   | I        | I        | WD       | C        | C        | I        | I        | C                 |
| DRB1*13:01:01:02                                            | 13:01:01:02            | HLA14833  | 13:01:01G                                     | 10           | 9            | 613           | 3            | 94           | 9           | 62           | 800           | WD                                                   | WD       | I        |          | C        | C        | I        | I        | C                 |
| DRB1*13:01:18                                               | 13:01:18               | HLA17459  | 13:01:01G                                     | 0            | 0            | 4             | 0            | 0            | 0           | 0            | 4             |                                                      |          |          |          |          |          |          |          |                   |
| DRB1*13:117                                                 | 13:117                 | HLA06820  | 13:01:01G                                     | 1            | 0            | 28            | 0            | 9            | 4           | 8            | 50            |                                                      |          | WD       |          | I        |          | WD       | WD       | I                 |
| DRB1*13:190                                                 | 13:190                 | HLA12415  | 13:01:01G                                     | 0            | 0            | 8             | 0            | 0            | 0           | 1            | 9             |                                                      |          | WD       |          |          |          |          | WD       | WD                |
| DRB1*13:215                                                 | 13:215                 | HLA14887  | 13:01:01G                                     | 0            | 0            | 1             | 0            | 0            | 0           | 0            | 1             |                                                      |          |          |          |          |          |          |          |                   |
| DRB1*13:01:03                                               | 13:01:03               | HLA01689  |                                               | 47           | 280          | 7             | 0            | 1            | 0           | 11           | 346           | C                                                    | C        | WD       |          |          |          | WD       | I        | C                 |
| DRB1*13:01:04                                               | 13:01:04               | HLA03852  |                                               | 0            | 1            | 0             | 0            | 0            | 0           | 0            | 1             |                                                      |          |          |          |          |          |          |          |                   |
| DRB1*13:01:05                                               | 13:01:05               | HLA03864  |                                               | 0            | 1            | 1             | 0            | 0            | 0           | 0            | 2             |                                                      |          |          |          |          |          |          |          |                   |
| DRB1*13:01:06                                               | 13:01:06               | HLA04407  |                                               | 0            | 0            | 2             | 0            | 0            | 0           | 0            | 2             |                                                      |          |          |          |          |          |          |          |                   |
| DRB1*13:01:07                                               | 13:01:07               | HLA04676  |                                               | 0            | 1            | 0             | 0            | 0            | 0           | 0            | 1             |                                                      |          |          |          |          |          |          |          |                   |
| DRB1*13:01:08                                               | 13:01:08               | HLA05822  |                                               | 2            | 0            | 2             | 0            | 1            | 0           | 2            | 7             |                                                      |          |          |          |          |          |          | WD       | WD                |
| DRB1*13:01:10                                               | 13:01:10               | HLA07259  |                                               | 0            | 0            | 4             | 0            | 0            | 0           | 1            | 5             |                                                      |          |          |          |          |          |          | WD       | WD                |
| DRB1*13:01:11                                               | 13:01:11               | HLA07510  |                                               | 0            | 0            | 1             | 0            | 0            | 0           | 0            | 1             |                                                      |          |          |          |          |          |          |          |                   |
| DRB1*13:01:13                                               | 13:01:13               | HLA07923  |                                               | 0            | 4            | 0             | 0            | 0            | 0           | 0            | 4             |                                                      |          |          |          |          |          |          |          |                   |
| DRB1*13:01:14                                               | 13:01:14               | HLA10313  |                                               | 0            | 7            | 0             | 0            | 0            | 0           | 0            | 7             |                                                      | WD       |          |          |          |          |          | WD       | WD                |
| <b>DRB1*13:02 total</b>                                     | <b>13:02 total</b>     |           |                                               | <b>25339</b> | <b>43830</b> | <b>457678</b> | <b>17049</b> | <b>24472</b> | <b>2660</b> | <b>61130</b> | <b>632158</b> | <b>C</b>                                             | <b>C</b> | <b>C</b> | <b>C</b> | <b>C</b> | <b>C</b> | <b>C</b> | <b>C</b> | <b>C</b>          |
| DRB1*13:02                                                  | 13:02                  |           |                                               | 1275         | 661          | 19949         | 621          | 2932         | 185         | 2354         | 27977         | C                                                    | C        | C        | C        | C        | C        | C        | C        | C                 |
| DRB1*13:02P                                                 | 13:02P                 |           |                                               | 2            | 0            | 736           | 7            | 1            | 0           | 1            | 747           |                                                      |          | I        | WD       |          |          |          | I        | I                 |
| <b>DRB1*13:02:01G total</b>                                 | <b>13:02:01G total</b> |           |                                               | <b>24053</b> | <b>43166</b> | <b>436923</b> | <b>16400</b> | <b>21536</b> | <b>2475</b> | <b>58759</b> | <b>603312</b> | <b>C</b>                                             | <b>C</b> | <b>C</b> | <b>C</b> | <b>C</b> | <b>C</b> | <b>C</b> | <b>C</b> | <b>C</b>          |
| DRB1*13:02:01G                                              | 13:02:01G              |           | 13:02:01G                                     | 565          | 12616        | 9172          | 648          | 1831         | 26          | 12153        | 37011         | C                                                    | C        | C        | C        | C        | C        | C        | C        | C                 |
| DRB1*13:02:01                                               | 13:02:01               |           | 13:02:01G                                     | 23488        | 30550        | 427714        | 15752        | 19705        | 2449        | 46603        | 566261        | C                                                    | C        | C        | C        | C        | C        | C        | C        | C                 |
| DRB1*13:02:01:02                                            | 13:02:01:02            | HLA17354  | 13:02:01G                                     | 0            | 0            | 8             | 0            | 0            | 0           | 0            | 8             |                                                      |          | WD       |          |          |          |          | WD       | WD                |
| DRB1*13:208                                                 | 13:208                 | HLA13995  | 13:02:01G                                     | 0            | 0            | 27            | 0            | 0            | 0           | 3            | 30            |                                                      |          | WD       |          |          |          |          | WD       | WD                |
| DRB1*13:236                                                 | 13:236                 | HLA16831  | 13:02:01G                                     | 0            | 0            | 2             | 0            | 0            | 0           | 0            | 2             |                                                      |          |          |          |          |          |          |          |                   |
| DRB1*13:02:02                                               | 13:02:02               | HLA01155  |                                               | 0            | 1            | 67            | 3            | 3            | 0           | 10           | 84            |                                                      |          | WD       |          |          |          | WD       | WD       | WD                |

| Supplemental Table 11: HLA-DRB1 Allele Summary <sup>a</sup> |                        |           | Allele Count by Population Group <sup>b</sup> |              |             |               |             |             |            |              |               | 3.0.0 CIWD Category by Population Group <sup>c</sup> |          |           |           |          |          |           |           |                   |
|-------------------------------------------------------------|------------------------|-----------|-----------------------------------------------|--------------|-------------|---------------|-------------|-------------|------------|--------------|---------------|------------------------------------------------------|----------|-----------|-----------|----------|----------|-----------|-----------|-------------------|
| Allele                                                      | Genomic Typing         | Allele ID | G group                                       | AFA          | API         | EURO          | MENA        | HIS         | NAM        | UNK          | Total         | AFA                                                  | API      | EURO      | MENA      | HIS      | NAM      | UNK       | Total     | Highest Frequency |
| DRB1*13:02:03                                               | 13:02:03               | HLA02768  |                                               | 0            | 0           | 1             | 3           | 0           | 0          | 0            | 4             |                                                      |          |           |           |          |          |           |           |                   |
| DRB1*13:02:05                                               | 13:02:05               | HLA06496  |                                               | 5            | 2           | 0             | 13          | 0           | 0          | 5            | 25            | WD                                                   |          |           | WD        |          |          | WD        | WD        | WD                |
| DRB1*13:02:06                                               | 13:02:06               | HLA07878  |                                               | 0            | 0           | 0             | 2           | 0           | 0          | 0            | 2             |                                                      |          |           |           |          |          |           |           |                   |
| DRB1*13:02:07                                               | 13:02:07               | HLA07885  |                                               | 3            | 0           | 0             | 0           | 0           | 0          | 0            | 3             |                                                      |          |           |           |          |          |           |           |                   |
| DRB1*13:02:08                                               | 13:02:08               | HLA09067  |                                               | 1            | 0           | 2             | 0           | 0           | 0          | 1            | 4             |                                                      |          |           |           |          |          |           |           |                   |
| <b>DRB1*13:03 total</b>                                     | <b>13:03 total</b>     |           |                                               | <b>12883</b> | <b>1353</b> | <b>166671</b> | <b>6908</b> | <b>8675</b> | <b>931</b> | <b>18048</b> | <b>215469</b> | <b>C</b>                                             | <b>C</b> | <b>C</b>  | <b>C</b>  | <b>C</b> | <b>C</b> | <b>C</b>  | <b>C</b>  | <b>C</b>          |
| DRB1*13:03                                                  | 13:03                  |           |                                               | 1500         | 55          | 10935         | 441         | 1631        | 104        | 1628         | 16294         | C                                                    | I        | C         | C         | C        | C        | C         | C         | C                 |
| DRB1*13:03P                                                 | 13:03P                 |           |                                               | 0            | 0           | 71            | 0           | 0           | 0          | 0            | 71            |                                                      |          | WD        |           |          |          |           | WD        | WD                |
| <b>DRB1*13:03:01G total</b>                                 | <b>13:03:01G total</b> |           |                                               | <b>11336</b> | <b>1298</b> | <b>155648</b> | <b>6463</b> | <b>7040</b> | <b>827</b> | <b>16409</b> | <b>199021</b> | <b>C</b>                                             | <b>C</b> | <b>C</b>  | <b>C</b>  | <b>C</b> | <b>C</b> | <b>C</b>  | <b>C</b>  | <b>C</b>          |
| DRB1*13:03:01G                                              | 13:03:01G              |           | 13:03:01G                                     | 56           | 105         | 1171          | 68          | 259         | 0          | 1169         | 2828          | C                                                    | I        | I         | C         | C        |          | C         | C         | C                 |
| DRB1*13:03:01                                               | 13:03:01               | HLA00799  | 13:03:01G                                     | 11280        | 1193        | 154470        | 6395        | 6781        | 827        | 15240        | 196186        | C                                                    | C        | C         | C         | C        | C        | C         | C         | C                 |
| DRB1*13:227                                                 | 13:227                 | HLA16047  | 13:03:01G                                     | 0            | 0           | 7             | 0           | 0           | 0          | 0            | 7             |                                                      |          | WD        |           |          |          |           | WD        | WD                |
| DRB1*13:03:02                                               | 13:03:02               | HLA00800  |                                               | 47           | 0           | 16            | 4           | 4           | 0          | 10           | 81            | C                                                    |          | WD        |           |          |          | WD        | WD        | C                 |
| DRB1*13:03:03                                               | 13:03:03               | HLA04117  |                                               | 0            | 0           | 1             | 0           | 0           | 0          | 1            | 2             |                                                      |          |           |           |          |          |           |           |                   |
| DRB1*13:04                                                  | 13:04                  | HLA00801  |                                               | 4349         | 41          | 585           | 24          | 2483        | 361        | 1470         | 9313          | C                                                    | I        | I         | WD        | C        | C        | C         | C         | C                 |
| <b>DRB1*13:05 total</b>                                     | <b>13:05 total</b>     |           |                                               | <b>167</b>   | <b>152</b>  | <b>23754</b>  | <b>1961</b> | <b>2427</b> | <b>123</b> | <b>6497</b>  | <b>35081</b>  | <b>C</b>                                             | <b>C</b> | <b>C</b>  | <b>C</b>  | <b>C</b> | <b>C</b> | <b>C</b>  | <b>C</b>  | <b>C</b>          |
| DRB1*13:05                                                  | 13:05                  |           |                                               | 18           | 11          | 2478          | 77          | 382         | 13         | 327          | 3306          | WD                                                   | WD       | C         | C         | C        | C        | C         | C         | C                 |
| DRB1*13:05P                                                 | 13:05P                 |           |                                               | 0            | 0           | 10            | 0           | 0           | 0          | 0            | 10            |                                                      |          | WD        |           |          |          |           | WD        | WD                |
| DRB1*13:05:01                                               | 13:05:01               | HLA00802  |                                               | 120          | 141         | 21265         | 1884        | 2043        | 110        | 6161         | 31724         | C                                                    | C        | C         | C         | C        | C        | C         | C         | C                 |
| DRB1*13:05:02                                               | 13:05:02               | HLA02318  |                                               | 29           | 0           | 1             | 0           | 2           | 0          | 9            | 41            | WD                                                   |          |           |           |          |          |           | WD        | WD                |
| DRB1*13:06                                                  | 13:06                  | HLA00803  |                                               | 2            | 1           | 343           | 1           | 5           | 1          | 36           | 389           |                                                      |          | I         |           | WD       |          | I         | I         | I                 |
| <b>DRB1*13:07 total</b>                                     | <b>13:07 total</b>     |           |                                               | <b>1</b>     | <b>80</b>   | <b>16</b>     | <b>28</b>   | <b>0</b>    | <b>0</b>   | <b>9</b>     | <b>134</b>    |                                                      | <b>I</b> | <b>WD</b> | <b>WD</b> |          |          | <b>WD</b> | <b>WD</b> | <b>I</b>          |
| DRB1*13:07                                                  | 13:07                  |           |                                               | 0            | 2           | 1             | 1           | 0           | 0          | 0            | 4             |                                                      |          |           |           |          |          |           |           |                   |
| DRB1*13:07:01                                               | 13:07:01               | HLA00804  |                                               | 0            | 78          | 10            | 27          | 0           | 0          | 7            | 122           |                                                      | I        | WD        | WD        |          |          |           | WD        | WD                |
| DRB1*13:07:02                                               | 13:07:02               | HLA00805  |                                               | 1            | 0           | 5             | 0           | 0           | 0          | 2            | 8             |                                                      |          | WD        |           |          |          |           | WD        | WD                |
| DRB1*13:08                                                  | 13:08                  | HLA00806  |                                               | 0            | 53          | 40            | 1           | 0           | 0          | 2            | 96            |                                                      | I        | WD        |           |          |          |           | WD        | I                 |
| DRB1*13:09                                                  | 13:09                  | HLA00807  |                                               | 0            | 0           | 7             | 0           | 18          | 0          | 3            | 28            |                                                      |          | WD        |           | I        |          |           | WD        | I                 |
| DRB1*13:10                                                  | 13:10                  | HLA00808  |                                               | 15           | 1           | 912           | 14          | 15          | 3          | 78           | 1038          | WD                                                   |          | I         | WD        | I        |          | I         | I         | I                 |
| <b>DRB1*13:11 total</b>                                     | <b>13:11 total</b>     |           |                                               | <b>2</b>     | <b>30</b>   | <b>207</b>    | <b>25</b>   | <b>58</b>   | <b>4</b>   | <b>40</b>    | <b>366</b>    |                                                      | <b>I</b> | <b>I</b>  | <b>WD</b> | <b>I</b> |          | <b>I</b>  | <b>I</b>  | <b>I</b>          |
| DRB1*13:11                                                  | 13:11                  |           |                                               | 1            | 2           | 8             | 1           | 15          | 1          | 2            | 30            |                                                      |          | WD        |           | I        |          |           | WD        | I                 |
| DRB1*13:11:01                                               | 13:11:01               | HLA00809  |                                               | 1            | 28          | 187           | 18          | 43          | 3          | 32           | 312           |                                                      | I        | I         | WD        | I        |          | I         | I         | I                 |



| Supplemental Table 11: HLA-DRB1 Allele Summary <sup>a</sup> |                    |           | Allele Count by Population Group <sup>b</sup> |           |             |            |           |           |          |            |             | 3.0.0 CIWD Category by Population Group <sup>c</sup> |          |           |           |           |     |          |           |                   |
|-------------------------------------------------------------|--------------------|-----------|-----------------------------------------------|-----------|-------------|------------|-----------|-----------|----------|------------|-------------|------------------------------------------------------|----------|-----------|-----------|-----------|-----|----------|-----------|-------------------|
| Allele                                                      | Genomic Typing     | Allele ID | G group                                       | AFA       | API         | EURO       | MENA      | HIS       | NAM      | UNK        | Total       | AFA                                                  | API      | EURO      | MENA      | HIS       | NAM | UNK      | Total     | Highest Frequency |
| DRB1*13:11:02                                               | 13:11:02           | HLA03407  |                                               | 0         | 0           | 12         | 6         | 0         | 0        | 6          | 24          |                                                      |          | WD        | WD        |           |     | WD       | WD        | WD                |
| <b>DRB1*13:12 total</b>                                     | <b>13:12 total</b> |           |                                               | <b>8</b>  | <b>1942</b> | <b>49</b>  | <b>2</b>  | <b>14</b> | <b>1</b> | <b>166</b> | <b>2182</b> | <b>WD</b>                                            | <b>C</b> | <b>WD</b> |           | <b>I</b>  |     | <b>C</b> | <b>C</b>  | <b>C</b>          |
| DRB1*13:12                                                  | 13:12              |           |                                               | 0         | 137         | 3          | 0         | 2         | 0        | 9          | 151         |                                                      | C        |           |           |           |     | WD       | WD        | C                 |
| DRB1*13:12:01                                               | 13:12:01           | HLA00810  |                                               | 5         | 1805        | 46         | 2         | 10        | 1        | 156        | 2025        | WD                                                   | C        | WD        |           | I         |     | C        | C         | C                 |
| DRB1*13:12:02                                               | 13:12:02           | HLA05950  |                                               | 3         | 0           | 0          | 0         | 2         | 0        | 1          | 6           |                                                      |          |           |           |           |     |          | WD        | WD                |
| DRB1*13:13                                                  | 13:13              | HLA00811  |                                               | 0         | 7           | 3          | 0         | 0         | 0        | 2          | 12          |                                                      | WD       |           |           |           |     |          | WD        | WD                |
| <b>DRB1*13:14 total</b>                                     | <b>13:14 total</b> |           |                                               | <b>21</b> | <b>17</b>   | <b>237</b> | <b>24</b> | <b>12</b> | <b>0</b> | <b>18</b>  | <b>329</b>  | <b>WD</b>                                            | <b>I</b> | <b>I</b>  | <b>WD</b> | <b>I</b>  |     | <b>I</b> | <b>I</b>  | <b>I</b>          |
| DRB1*13:14                                                  | 13:14              |           |                                               | 0         | 1           | 14         | 3         | 4         | 0        | 4          | 26          |                                                      |          | WD        |           |           |     |          | WD        | WD                |
| DRB1*13:14:01                                               | 13:14:01           | HLA00812  |                                               | 4         | 14          | 200        | 21        | 4         | 0        | 11         | 254         |                                                      | I        | I         | WD        |           |     | WD       | I         | I                 |
| DRB1*13:14:02                                               | 13:14:02           | HLA01154  |                                               | 0         | 2           | 23         | 0         | 1         | 0        | 2          | 28          |                                                      |          | WD        |           |           |     |          | WD        | WD                |
| DRB1*13:14:03                                               | 13:14:03           | HLA03208  |                                               | 17        | 0           | 0          | 0         | 3         | 0        | 1          | 21          | WD                                                   |          |           |           |           |     |          | WD        | WD                |
| DRB1*13:15                                                  | 13:15              | HLA00813  |                                               | 2         | 3           | 1515       | 35        | 5         | 0        | 27         | 1587        |                                                      |          | C         | WD        | WD        |     | I        | I         | C                 |
| DRB1*13:16                                                  | 13:16              | HLA00814  |                                               | 172       | 0           | 14         | 8         | 15        | 6        | 45         | 260         | C                                                    |          | WD        | WD        | I         | WD  | I        | I         | C                 |
| DRB1*13:17                                                  | 13:17              | HLA00815  |                                               | 0         | 0           | 43         | 0         | 0         | 0        | 1          | 44          |                                                      |          | WD        |           |           |     |          | WD        | WD                |
| DRB1*13:18                                                  | 13:18              | HLA00816  |                                               | 1         | 1           | 195        | 11        | 3         | 0        | 14         | 225         |                                                      |          | I         | WD        |           |     | I        | I         | I                 |
| DRB1*13:19                                                  | 13:19              | HLA00817  |                                               | 0         | 27          | 334        | 18        | 3         | 1        | 11         | 394         |                                                      | I        | I         | WD        |           |     | WD       | I         | I                 |
| DRB1*13:20                                                  | 13:20              | HLA00818  |                                               | 5         | 2           | 96         | 3         | 1         | 0        | 13         | 120         | WD                                                   |          | WD        |           |           |     | WD       | WD        | WD                |
| <b>DRB1*13:21 total</b>                                     | <b>13:21 total</b> |           |                                               | <b>0</b>  | <b>0</b>    | <b>377</b> | <b>18</b> | <b>6</b>  | <b>0</b> | <b>14</b>  | <b>415</b>  |                                                      |          | <b>I</b>  | <b>WD</b> | <b>WD</b> |     | <b>I</b> | <b>I</b>  | <b>I</b>          |
| DRB1*13:21                                                  | 13:21              |           |                                               | 0         | 0           | 22         | 2         | 0         | 0        | 1          | 25          |                                                      |          | WD        |           |           |     |          | WD        | WD                |
| DRB1*13:21:01                                               | 13:21:01           | HLA00819  |                                               | 0         | 0           | 238        | 16        | 6         | 0        | 11         | 271         |                                                      |          | I         | WD        | WD        |     | WD       | I         | I                 |
| DRB1*13:21:02                                               | 13:21:02           | HLA04669  |                                               | 0         | 0           | 117        | 0         | 0         | 0        | 2          | 119         |                                                      |          | WD        |           |           |     |          | WD        | WD                |
| DRB1*13:22                                                  | 13:22              | HLA00820  |                                               | 2         | 2           | 216        | 2         | 0         | 0        | 11         | 233         |                                                      |          | I         |           |           |     | WD       | I         | I                 |
| <b>DRB1*13:23 total</b>                                     | <b>13:23 total</b> |           |                                               | <b>1</b>  | <b>0</b>    | <b>1</b>   | <b>0</b>  | <b>1</b>  | <b>0</b> | <b>3</b>   | <b>6</b>    |                                                      |          |           |           |           |     |          | <b>WD</b> | <b>WD</b>         |
| DRB1*13:23:01                                               | 13:23:01           | HLA00821  |                                               | 1         | 0           | 0          | 0         | 1         | 0        | 3          | 5           |                                                      |          |           |           |           |     |          | WD        | WD                |
| DRB1*13:23:02                                               | 13:23:02           | HLA05976  |                                               | 0         | 0           | 1          | 0         | 0         | 0        | 0          | 1           |                                                      |          |           |           |           |     |          |           |                   |
| DRB1*13:24                                                  | 13:24              | HLA00822  |                                               | 0         | 0           | 75         | 4         | 3         | 0        | 6          | 88          |                                                      |          | WD        |           |           |     | WD       | WD        | WD                |
| DRB1*13:25                                                  | 13:25              | HLA00823  |                                               | 0         | 0           | 4          | 0         | 2         | 0        | 0          | 6           |                                                      |          |           |           |           |     |          | WD        | WD                |
| <b>DRB1*13:26 total</b>                                     | <b>13:26 total</b> |           |                                               | <b>0</b>  | <b>1</b>    | <b>32</b>  | <b>0</b>  | <b>4</b>  | <b>0</b> | <b>2</b>   | <b>39</b>   |                                                      |          | <b>WD</b> |           |           |     |          | <b>WD</b> | <b>WD</b>         |
| DRB1*13:26                                                  | 13:26              |           |                                               | 0         | 0           | 5          | 0         | 1         | 0        | 1          | 7           |                                                      |          | WD        |           |           |     |          | WD        | WD                |
| DRB1*13:26:01                                               | 13:26:01           | HLA00824  |                                               | 0         | 1           | 27         | 0         | 3         | 0        | 0          | 31          |                                                      |          | WD        |           |           |     |          | WD        | WD                |
| DRB1*13:26:02                                               | 13:26:02           | HLA08094  |                                               | 0         | 0           | 0          | 0         | 0         | 0        | 1          | 1           |                                                      |          |           |           |           |     |          |           |                   |

| Supplemental Table 11: HLA-DRB1 Allele Summary <sup>a</sup> |                    |           | Allele Count by Population Group <sup>b</sup> |          |          |           |          |          |          |          |           | 3.0.0 CIWD Category by Population Group <sup>c</sup> |           |           |      |     |     |     |           |                   |
|-------------------------------------------------------------|--------------------|-----------|-----------------------------------------------|----------|----------|-----------|----------|----------|----------|----------|-----------|------------------------------------------------------|-----------|-----------|------|-----|-----|-----|-----------|-------------------|
| Allele                                                      | Genomic Typing     | Allele ID | G group                                       | AFA      | API      | EURO      | MENA     | HIS      | NAM      | UNK      | Total     | AFA                                                  | API       | EURO      | MENA | HIS | NAM | UNK | Total     | Highest Frequency |
| DRB1*13:27                                                  | 13:27              | HLA00825  |                                               | 5        | 3        | 7         | 0        | 0        | 0        | 3        | 18        | WD                                                   |           | WD        |      |     |     |     | WD        | WD                |
| DRB1*13:28                                                  | 13:28              | HLA00826  |                                               | 0        | 0        | 46        | 0        | 0        | 0        | 0        | 46        |                                                      |           | WD        |      |     |     |     | WD        | WD                |
| DRB1*13:29                                                  | 13:29              | HLA00827  |                                               | 2        | 1        | 76        | 0        | 2        | 0        | 8        | 89        |                                                      |           | WD        |      |     |     | WD  | WD        | WD                |
| DRB1*13:30                                                  | 13:30              | HLA00828  |                                               | 0        | 1        | 0         | 0        | 0        | 0        | 1        | 2         |                                                      |           |           |      |     |     |     |           |                   |
| DRB1*13:31                                                  | 13:31              | HLA00829  |                                               | 142      | 0        | 7         | 0        | 10       | 5        | 28       | 192       | C                                                    |           | WD        |      | I   | WD  | I   | I         | C                 |
| DRB1*13:32                                                  | 13:32              | HLA00830  |                                               | 0        | 1        | 4         | 0        | 0        | 0        | 0        | 5         |                                                      |           |           |      |     |     |     | WD        | WD                |
| <b>DRB1*13:33 total</b>                                     | <b>13:33 total</b> |           |                                               | <b>0</b> | <b>0</b> | <b>30</b> | <b>0</b> | <b>0</b> | <b>0</b> | <b>1</b> | <b>31</b> |                                                      |           | <b>WD</b> |      |     |     |     | <b>WD</b> | <b>WD</b>         |
| DRB1*13:33                                                  | 13:33              |           |                                               | 0        | 0        | 3         | 0        | 0        | 0        | 0        | 3         |                                                      |           |           |      |     |     |     |           |                   |
| DRB1*13:33:03                                               | 13:33:03           | HLA03861  |                                               | 0        | 0        | 24        | 0        | 0        | 0        | 1        | 25        |                                                      |           | WD        |      |     |     |     | WD        | WD                |
| DRB1*13:33:01                                               | 13:33:01           | HLA00831  |                                               | 0        | 0        | 3         | 0        | 0        | 0        | 0        | 3         |                                                      |           |           |      |     |     |     |           |                   |
| DRB1*13:34                                                  | 13:34              | HLA00832  |                                               | 0        | 0        | 3         | 0        | 0        | 0        | 3        | 6         |                                                      |           |           |      |     |     |     | WD        | WD                |
| DRB1*13:35                                                  | 13:35              | HLA01091  |                                               | 0        | 0        | 2         | 0        | 0        | 0        | 0        | 2         |                                                      |           |           |      |     |     |     |           |                   |
| DRB1*13:36                                                  | 13:36              | HLA01101  |                                               | 3        | 4        | 108       | 0        | 1        | 0        | 8        | 124       |                                                      |           | WD        |      |     |     | WD  | WD        | WD                |
| DRB1*13:37                                                  | 13:37              | HLA01150  |                                               | 14       | 0        | 3         | 0        | 0        | 0        | 3        | 20        | WD                                                   |           |           |      |     |     |     | WD        | WD                |
| DRB1*13:38                                                  | 13:38              | HLA01151  |                                               | 7        | 0        | 127       | 0        | 1        | 0        | 1        | 136       | WD                                                   |           | I         |      |     |     |     | WD        | I                 |
| DRB1*13:39                                                  | 13:39              | HLA01166  |                                               | 0        | 6        | 11        | 2        | 0        | 0        | 1        | 20        |                                                      | WD        | WD        |      |     |     |     | WD        | WD                |
| DRB1*13:40                                                  | 13:40              | HLA01209  |                                               | 2        | 2        | 23        | 0        | 33       | 6        | 12       | 78        |                                                      |           | WD        |      | I   | WD  | WD  | WD        | I                 |
| DRB1*13:41                                                  | 13:41              | HLA01212  |                                               | 1        | 0        | 3         | 0        | 0        | 0        | 2        | 6         |                                                      |           |           |      |     |     |     | WD        | WD                |
| DRB1*13:42                                                  | 13:42              | HLA01236  |                                               | 1        | 5        | 38        | 0        | 9        | 0        | 3        | 56        |                                                      | WD        | WD        |      | I   |     |     | WD        | I                 |
| DRB1*13:44                                                  | 13:44              | HLA01240  |                                               | 0        | 0        | 1         | 0        | 0        | 0        | 0        | 1         |                                                      |           |           |      |     |     |     |           |                   |
| DRB1*13:45                                                  | 13:45              | HLA01241  |                                               | 0        | 0        | 1         | 0        | 0        | 0        | 0        | 1         |                                                      |           |           |      |     |     |     |           |                   |
| DRB1*13:46                                                  | 13:46              | HLA01350  |                                               | 0        | 0        | 1         | 0        | 0        | 0        | 0        | 1         |                                                      |           |           |      |     |     |     |           |                   |
| DRB1*13:48                                                  | 13:48              | HLA01442  |                                               | 1        | 0        | 6         | 0        | 1        | 0        | 0        | 8         |                                                      |           | WD        |      |     |     |     | WD        | WD                |
| DRB1*13:49                                                  | 13:49              | HLA01456  |                                               | 0        | 389      | 26        | 2        | 2        | 0        | 2        | 421       |                                                      | C         | WD        |      |     |     |     | I         | C                 |
| <b>DRB1*13:50 total</b>                                     | <b>13:50 total</b> |           |                                               | <b>4</b> | <b>5</b> | <b>6</b>  | <b>2</b> | <b>0</b> | <b>0</b> | <b>5</b> | <b>22</b> |                                                      | <b>WD</b> | <b>WD</b> |      |     |     |     | <b>WD</b> | <b>WD</b>         |
| DRB1*13:50                                                  | 13:50              |           |                                               | 2        | 0        | 1         | 0        | 0        | 0        | 0        | 3         |                                                      |           |           |      |     |     |     |           |                   |
| DRB1*13:50:01                                               | 13:50:01           | HLA01539  |                                               | 0        | 5        | 0         | 2        | 0        | 0        | 0        | 7         |                                                      | WD        |           |      |     |     |     | WD        | WD                |
| DRB1*13:50:02                                               | 13:50:02           | HLA03182  |                                               | 1        | 0        | 5         | 0        | 0        | 0        | 3        | 9         |                                                      |           | WD        |      |     |     |     | WD        | WD                |
| DRB1*13:50:03                                               | 13:50:03           | HLA11901  |                                               | 1        | 0        | 0         | 0        | 0        | 0        | 2        | 3         |                                                      |           |           |      |     |     |     |           |                   |
| DRB1*13:52                                                  | 13:52              | HLA01643  |                                               | 0        | 0        | 54        | 0        | 0        | 0        | 0        | 54        |                                                      |           | WD        |      |     |     |     | WD        | WD                |
| DRB1*13:53                                                  | 13:53              | HLA01622  |                                               | 1        | 0        | 6         | 0        | 0        | 0        | 1        | 8         |                                                      |           | WD        |      |     |     |     | WD        | WD                |

| Supplemental Table 11: HLA-DRB1 Allele Summary <sup>a</sup> |                    |           | Allele Count by Population Group <sup>b</sup> |          |          |           |          |          |          |          |           | 3.0.0 CIWD Category by Population Group <sup>c</sup> |           |           |      |     |     |     |           |                   |
|-------------------------------------------------------------|--------------------|-----------|-----------------------------------------------|----------|----------|-----------|----------|----------|----------|----------|-----------|------------------------------------------------------|-----------|-----------|------|-----|-----|-----|-----------|-------------------|
| Allele                                                      | Genomic Typing     | Allele ID | G group                                       | AFA      | API      | EURO      | MENA     | HIS      | NAM      | UNK      | Total     | AFA                                                  | API       | EURO      | MENA | HIS | NAM | UNK | Total     | Highest Frequency |
| DRB1*13:54                                                  | 13:54              | HLA01623  |                                               | 0        | 0        | 5         | 8        | 0        | 0        | 2        | 15        |                                                      |           | WD        | WD   |     |     |     | WD        | WD                |
| DRB1*13:56                                                  | 13:56              | HLA01724  |                                               | 0        | 0        | 15        | 0        | 18       | 0        | 5        | 38        |                                                      |           | WD        |      | I   |     | WD  | WD        | I                 |
| DRB1*13:57                                                  | 13:57              | HLA01730  |                                               | 0        | 0        | 1         | 0        | 0        | 0        | 0        | 1         |                                                      |           |           |      |     |     |     |           |                   |
| DRB1*13:59                                                  | 13:59              | HLA01737  |                                               | 4        | 1        | 8         | 0        | 87       | 26       | 16       | 142       |                                                      |           | WD        |      | C   | C   | I   | WD        | C                 |
| <b>DRB1*13:61 total</b>                                     | <b>13:61 total</b> |           |                                               | <b>0</b> | <b>5</b> | <b>65</b> | <b>0</b> | <b>1</b> | <b>0</b> | <b>1</b> | <b>72</b> |                                                      | <b>WD</b> | <b>WD</b> |      |     |     |     | <b>WD</b> | <b>WD</b>         |
| DRB1*13:61                                                  | 13:61              |           |                                               | 0        | 0        | 5         | 0        | 0        | 0        | 0        | 5         |                                                      |           | WD        |      |     |     |     | WD        | WD                |
| DRB1*13:61:01                                               | 13:61:01           | HLA01791  |                                               | 0        | 5        | 54        | 0        | 1        | 0        | 0        | 60        |                                                      | WD        | WD        |      |     |     |     | WD        | WD                |
| DRB1*13:61:02                                               | 13:61:02           | HLA06497  |                                               | 0        | 0        | 6         | 0        | 0        | 0        | 1        | 7         |                                                      |           | WD        |      |     |     |     | WD        | WD                |
| DRB1*13:62                                                  | 13:62              | HLA01813  |                                               | 0        | 0        | 17        | 0        | 0        | 0        | 0        | 17        |                                                      |           | WD        |      |     |     |     | WD        | WD                |
| DRB1*13:63                                                  | 13:63              | HLA01854  |                                               | 0        | 0        | 21        | 2        | 0        | 0        | 0        | 23        |                                                      |           | WD        |      |     |     |     | WD        | WD                |
| DRB1*13:64                                                  | 13:64              | HLA01932  |                                               | 0        | 0        | 1         | 0        | 0        | 0        | 2        | 3         |                                                      |           |           |      |     |     |     |           |                   |
| DRB1*13:65                                                  | 13:65              | HLA01991  |                                               | 0        | 0        | 5         | 0        | 0        | 0        | 0        | 5         |                                                      |           | WD        |      |     |     |     | WD        | WD                |
| <b>DRB1*13:66 total</b>                                     | <b>13:66 total</b> |           |                                               | <b>1</b> | <b>0</b> | <b>2</b>  | <b>2</b> | <b>0</b> | <b>0</b> | <b>0</b> | <b>5</b>  |                                                      |           |           |      |     |     |     | <b>WD</b> | <b>WD</b>         |
| DRB1*13:66                                                  | 13:66              |           |                                               | 0        | 0        | 1         | 0        | 0        | 0        | 0        | 1         |                                                      |           |           |      |     |     |     |           |                   |
| DRB1*13:66:02                                               | 13:66:02           | HLA04689  |                                               | 1        | 0        | 1         | 2        | 0        | 0        | 0        | 4         |                                                      |           |           |      |     |     |     |           |                   |
| DRB1*13:67                                                  | 13:67              | HLA02030  |                                               | 0        | 0        | 25        | 0        | 1        | 0        | 1        | 27        |                                                      |           | WD        |      |     |     |     | WD        | WD                |
| DRB1*13:68                                                  | 13:68              | HLA02158  |                                               | 0        | 0        | 1         | 0        | 0        | 0        | 1        | 2         |                                                      |           |           |      |     |     |     |           |                   |
| DRB1*13:69                                                  | 13:69              | HLA02289  |                                               | 5        | 0        | 1         | 0        | 0        | 1        | 1        | 8         | WD                                                   |           |           |      |     |     |     | WD        | WD                |
| DRB1*13:70                                                  | 13:70              | HLA02359  |                                               | 0        | 0        | 13        | 0        | 0        | 0        | 0        | 13        |                                                      |           | WD        |      |     |     |     | WD        | WD                |
| DRB1*13:75                                                  | 13:75              | HLA02702  |                                               | 0        | 0        | 4         | 0        | 1        | 0        | 0        | 5         |                                                      |           |           |      |     |     |     | WD        | WD                |
| DRB1*13:77                                                  | 13:77              | HLA02893  |                                               | 0        | 0        | 4         | 0        | 1        | 0        | 1        | 6         |                                                      |           |           |      |     |     |     | WD        | WD                |
| DRB1*13:78                                                  | 13:78              | HLA02903  |                                               | 0        | 0        | 4         | 0        | 0        | 0        | 0        | 4         |                                                      |           |           |      |     |     |     |           |                   |
| DRB1*13:79                                                  | 13:79              | HLA02904  |                                               | 1        | 1        | 42        | 0        | 0        | 0        | 8        | 52        |                                                      |           | WD        |      |     |     | WD  | WD        | WD                |
| DRB1*13:80                                                  | 13:80              | HLA03034  |                                               | 1        | 0        | 5         | 0        | 3        | 0        | 4        | 13        |                                                      |           | WD        |      |     |     |     | WD        | WD                |
| DRB1*13:81                                                  | 13:81              | HLA03058  |                                               | 1        | 0        | 0         | 0        | 1        | 0        | 3        | 5         |                                                      |           |           |      |     |     |     | WD        | WD                |
| DRB1*13:82                                                  | 13:82              | HLA03168  |                                               | 1        | 71       | 1         | 0        | 0        | 0        | 0        | 73        |                                                      | I         |           |      |     |     |     | WD        | I                 |
| DRB1*13:86                                                  | 13:86              | HLA03411  |                                               | 0        | 0        | 1         | 0        | 0        | 0        | 0        | 1         |                                                      |           |           |      |     |     |     |           |                   |
| DRB1*13:87                                                  | 13:87              | HLA03447  |                                               | 0        | 0        | 0         | 4        | 0        | 0        | 1        | 5         |                                                      |           |           |      |     |     |     | WD        | WD                |
| DRB1*13:88                                                  | 13:88              | HLA03640  |                                               | 1        | 0        | 15        | 0        | 0        | 0        | 0        | 16        |                                                      |           | WD        |      |     |     |     | WD        | WD                |
| DRB1*13:89                                                  | 13:89              | HLA03848  |                                               | 0        | 0        | 2         | 0        | 0        | 0        | 1        | 3         |                                                      |           |           |      |     |     |     |           |                   |
| DRB1*13:90                                                  | 13:90              | HLA03850  |                                               | 0        | 0        | 7         | 0        | 0        | 0        | 0        | 7         |                                                      |           | WD        |      |     |     |     | WD        | WD                |

| Supplemental Table 11: HLA-DRB1 Allele Summary <sup>a</sup> |                    |           | Allele Count by Population Group <sup>b</sup> |          |          |          |          |          |          |          |           | 3.0.0 CIWD Category by Population Group <sup>c</sup> |     |           |      |     |     |     |           |                   |
|-------------------------------------------------------------|--------------------|-----------|-----------------------------------------------|----------|----------|----------|----------|----------|----------|----------|-----------|------------------------------------------------------|-----|-----------|------|-----|-----|-----|-----------|-------------------|
| Allele                                                      | Genomic Typing     | Allele ID | G group                                       | AFA      | API      | EURO     | MENA     | HIS      | NAM      | UNK      | Total     | AFA                                                  | API | EURO      | MENA | HIS | NAM | UNK | Total     | Highest Frequency |
| DRB1*13:91                                                  | 13:91              | HLA03857  |                                               | 0        | 0        | 11       | 0        | 0        | 0        | 0        | 11        |                                                      |     | WD        |      |     |     |     | WD        | WD                |
| DRB1*13:92                                                  | 13:92              | HLA03865  |                                               | 0        | 0        | 0        | 0        | 1        | 0        | 0        | 1         |                                                      |     |           |      |     |     |     |           |                   |
| DRB1*13:93                                                  | 13:93              | HLA04029  |                                               | 0        | 0        | 8        | 0        | 0        | 0        | 14       | 22        |                                                      |     | WD        |      |     |     | I   | WD        | I                 |
| DRB1*13:95                                                  | 13:95              | HLA04653  |                                               | 0        | 0        | 7        | 0        | 0        | 0        | 1        | 8         |                                                      |     | WD        |      |     |     |     | WD        | WD                |
| <b>DRB1*13:96 total</b>                                     | <b>13:96 total</b> |           |                                               | <b>1</b> | <b>3</b> | <b>9</b> | <b>0</b> | <b>0</b> | <b>0</b> | <b>0</b> | <b>13</b> |                                                      |     | <b>WD</b> |      |     |     |     | <b>WD</b> | <b>WD</b>         |
| DRB1*13:96                                                  | 13:96              |           |                                               | 0        | 0        | 3        | 0        | 0        | 0        | 0        | 3         |                                                      |     |           |      |     |     |     |           |                   |
| DRB1*13:96:01                                               | 13:96:01           | HLA04665  |                                               | 1        | 0        | 1        | 0        | 0        | 0        | 0        | 2         |                                                      |     |           |      |     |     |     |           |                   |
| DRB1*13:96:02                                               | 13:96:02           | HLA06774  |                                               | 0        | 3        | 5        | 0        | 0        | 0        | 0        | 8         |                                                      |     | WD        |      |     |     |     | WD        | WD                |
| <b>DRB1*13:97 total</b>                                     | <b>13:97 total</b> |           |                                               | <b>1</b> | <b>1</b> | <b>2</b> | <b>1</b> | <b>0</b> | <b>0</b> | <b>0</b> | <b>5</b>  |                                                      |     |           |      |     |     |     | <b>WD</b> | <b>WD</b>         |
| DRB1*13:97                                                  | 13:97              |           |                                               | 0        | 1        | 2        | 0        | 0        | 0        | 0        | 3         |                                                      |     |           |      |     |     |     |           |                   |
| DRB1*13:97:02                                               | 13:97:02           | HLA07875  |                                               | 1        | 0        | 0        | 1        | 0        | 0        | 0        | 2         |                                                      |     |           |      |     |     |     |           |                   |
| DRB1*13:98                                                  | 13:98              | HLA04686  |                                               | 0        | 2        | 0        | 0        | 0        | 0        | 0        | 2         |                                                      |     |           |      |     |     |     |           |                   |
| DRB1*13:100                                                 | 13:100             | HLA05300  |                                               | 0        | 0        | 1        | 0        | 0        | 0        | 0        | 1         |                                                      |     |           |      |     |     |     |           |                   |
| DRB1*13:103                                                 | 13:103             | HLA05848  |                                               | 1        | 0        | 0        | 0        | 0        | 0        | 0        | 1         |                                                      |     |           |      |     |     |     |           |                   |
| DRB1*13:104                                                 | 13:104             | HLA05952  |                                               | 0        | 0        | 11       | 0        | 0        | 0        | 0        | 11        |                                                      |     | WD        |      |     |     |     | WD        | WD                |
| DRB1*13:105                                                 | 13:105             | HLA05970  |                                               | 0        | 0        | 3        | 0        | 0        | 0        | 0        | 3         |                                                      |     |           |      |     |     |     |           |                   |
| DRB1*13:106                                                 | 13:106             | HLA05971  |                                               | 0        | 0        | 21       | 0        | 0        | 0        | 1        | 22        |                                                      |     | WD        |      |     |     |     | WD        | WD                |
| DRB1*13:107                                                 | 13:107             | HLA05972  |                                               | 0        | 0        | 1        | 0        | 0        | 0        | 0        | 1         |                                                      |     |           |      |     |     |     |           |                   |
| DRB1*13:108                                                 | 13:108             | HLA05974  |                                               | 0        | 0        | 10       | 0        | 0        | 0        | 1        | 11        |                                                      |     | WD        |      |     |     |     | WD        | WD                |
| DRB1*13:109                                                 | 13:109             | HLA05981  |                                               | 0        | 0        | 2        | 0        | 0        | 0        | 0        | 2         |                                                      |     |           |      |     |     |     |           |                   |
| DRB1*13:110                                                 | 13:110             | HLA05982  |                                               | 0        | 0        | 2        | 0        | 0        | 0        | 0        | 2         |                                                      |     |           |      |     |     |     |           |                   |
| DRB1*13:111                                                 | 13:111             | HLA05993  |                                               | 0        | 0        | 12       | 2        | 1        | 0        | 0        | 15        |                                                      |     | WD        |      |     |     |     | WD        | WD                |
| DRB1*13:112                                                 | 13:112             | HLA05995  |                                               | 0        | 0        | 3        | 0        | 0        | 0        | 0        | 3         |                                                      |     |           |      |     |     |     |           |                   |
| DRB1*13:118                                                 | 13:118             | HLA06868  |                                               | 0        | 2        | 0        | 0        | 0        | 0        | 0        | 2         |                                                      |     |           |      |     |     |     |           |                   |
| DRB1*13:124                                                 | 13:124             | HLA07161  |                                               | 0        | 0        | 5        | 0        | 0        | 0        | 0        | 5         |                                                      |     | WD        |      |     |     |     | WD        | WD                |
| DRB1*13:127                                                 | 13:127             | HLA07170  |                                               | 0        | 0        | 3        | 0        | 0        | 0        | 0        | 3         |                                                      |     |           |      |     |     |     |           |                   |
| DRB1*13:128                                                 | 13:128             | HLA07184  |                                               | 0        | 0        | 5        | 0        | 27       | 2        | 4        | 38        |                                                      |     | WD        |      | I   |     |     | WD        | I                 |
| DRB1*13:131                                                 | 13:131             | HLA07258  |                                               | 0        | 0        | 1        | 0        | 0        | 0        | 0        | 1         |                                                      |     |           |      |     |     |     |           |                   |
| DRB1*13:134                                                 | 13:134             | HLA07301  |                                               | 0        | 2        | 0        | 0        | 0        | 0        | 0        | 2         |                                                      |     |           |      |     |     |     |           |                   |
| DRB1*13:137N                                                | 13:137N            | HLA07512  |                                               | 0        | 0        | 2        | 0        | 0        | 0        | 0        | 2         |                                                      |     |           |      |     |     |     |           |                   |
| DRB1*13:138                                                 | 13:138             | HLA07519  |                                               | 0        | 0        | 3        | 0        | 0        | 0        | 0        | 3         |                                                      |     |           |      |     |     |     |           |                   |

| Supplemental Table 11: HLA-DRB1 Allele Summary <sup>a</sup> |                |           | Allele Count by Population Group <sup>b</sup> |     |     |      |      |     |     |     |       | 3.0.0 CIWD Category by Population Group <sup>c</sup> |     |      |      |     |     |     |       |                   |  |
|-------------------------------------------------------------|----------------|-----------|-----------------------------------------------|-----|-----|------|------|-----|-----|-----|-------|------------------------------------------------------|-----|------|------|-----|-----|-----|-------|-------------------|--|
| Allele                                                      | Genomic Typing | Allele ID | G group                                       | AFA | API | EURO | MENA | HIS | NAM | UNK | Total | AFA                                                  | API | EURO | MENA | HIS | NAM | UNK | Total | Highest Frequency |  |
| DRB1*13:139                                                 | 13:139         | HLA07802  |                                               | 0   | 0   | 0    | 0    | 0   | 1   | 0   | 1     |                                                      |     |      |      |     |     |     |       |                   |  |
| DRB1*13:141                                                 | 13:141         | HLA07879  |                                               | 0   | 0   | 1    | 3    | 0   | 0   | 0   | 4     |                                                      |     |      |      |     |     |     |       |                   |  |
| DRB1*13:142N                                                | 13:142N        | HLA07880  |                                               | 0   | 0   | 3    | 0    | 0   | 0   | 0   | 3     |                                                      |     |      |      |     |     |     |       |                   |  |
| DRB1*13:144                                                 | 13:144         | HLA08856  |                                               | 0   | 0   | 0    | 1    | 0   | 0   | 1   | 2     |                                                      |     |      |      |     |     |     |       |                   |  |
| DRB1*13:146                                                 | 13:146         | HLA08861  |                                               | 0   | 0   | 2    | 0    | 0   | 0   | 0   | 2     |                                                      |     |      |      |     |     |     |       |                   |  |
| DRB1*13:148                                                 | 13:148         | HLA08864  |                                               | 0   | 0   | 1    | 0    | 0   | 0   | 0   | 1     |                                                      |     |      |      |     |     |     |       |                   |  |
| DRB1*13:150                                                 | 13:150         | HLA08871  |                                               | 0   | 0   | 5    | 0    | 0   | 0   | 0   | 5     |                                                      |     | WD   |      |     |     |     | WD    | WD                |  |
| DRB1*13:152                                                 | 13:152         | HLA08873  |                                               | 0   | 0   | 1    | 0    | 0   | 0   | 0   | 1     |                                                      |     |      |      |     |     |     |       |                   |  |
| DRB1*13:154                                                 | 13:154         | HLA08887  |                                               | 0   | 0   | 1    | 0    | 0   | 0   | 0   | 1     |                                                      |     |      |      |     |     |     |       |                   |  |
| DRB1*13:155                                                 | 13:155         | HLA09064  |                                               | 2   | 0   | 1    | 0    | 0   | 0   | 2   | 5     |                                                      |     |      |      |     |     |     | WD    | WD                |  |
| DRB1*13:157                                                 | 13:157         | HLA09066  |                                               | 0   | 0   | 1    | 0    | 0   | 0   | 1   | 2     |                                                      |     |      |      |     |     |     |       |                   |  |
| DRB1*13:158                                                 | 13:158         | HLA09068  |                                               | 0   | 0   | 10   | 0    | 0   | 0   | 0   | 10    |                                                      |     | WD   |      |     |     |     | WD    | WD                |  |
| DRB1*13:159                                                 | 13:159         | HLA09213  |                                               | 0   | 0   | 1    | 0    | 0   | 0   | 0   | 1     |                                                      |     |      |      |     |     |     |       |                   |  |
| DRB1*13:162                                                 | 13:162         | HLA09658  |                                               | 0   | 0   | 1    | 0    | 0   | 0   | 0   | 1     |                                                      |     |      |      |     |     |     |       |                   |  |
| DRB1*13:165                                                 | 13:165         | HLA10314  |                                               | 0   | 0   | 1    | 0    | 0   | 0   | 0   | 1     |                                                      |     |      |      |     |     |     |       |                   |  |
| DRB1*13:166                                                 | 13:166         | HLA10315  |                                               | 0   | 0   | 1    | 0    | 0   | 0   | 0   | 1     |                                                      |     |      |      |     |     |     |       |                   |  |
| DRB1*13:167                                                 | 13:167         | HLA10317  |                                               | 0   | 0   | 1    | 0    | 0   | 0   | 0   | 1     |                                                      |     |      |      |     |     |     |       |                   |  |
| DRB1*13:169                                                 | 13:169         | HLA10658  |                                               | 0   | 0   | 1    | 1    | 0   | 0   | 0   | 2     |                                                      |     |      |      |     |     |     |       |                   |  |
| DRB1*13:170                                                 | 13:170         | HLA11168  |                                               | 0   | 1   | 0    | 0    | 0   | 0   | 0   | 1     |                                                      |     |      |      |     |     |     |       |                   |  |
| DRB1*13:172                                                 | 13:172         | HLA11170  |                                               | 0   | 0   | 0    | 0    | 0   | 0   | 1   | 1     |                                                      |     |      |      |     |     |     |       |                   |  |
| DRB1*13:175                                                 | 13:175         | HLA11373  |                                               | 0   | 4   | 0    | 0    | 0   | 0   | 0   | 4     |                                                      |     |      |      |     |     |     |       |                   |  |
| DRB1*13:177                                                 | 13:177         | HLA11377  |                                               | 2   | 0   | 0    | 0    | 0   | 0   | 0   | 2     |                                                      |     |      |      |     |     |     |       |                   |  |
| DRB1*13:178                                                 | 13:178         | HLA11378  |                                               | 0   | 2   | 0    | 0    | 0   | 0   | 0   | 2     |                                                      |     |      |      |     |     |     |       |                   |  |
| DRB1*13:179                                                 | 13:179         | HLA11379  |                                               | 0   | 0   | 0    | 1    | 0   | 0   | 0   | 1     |                                                      |     |      |      |     |     |     |       |                   |  |
| DRB1*13:187                                                 | 13:187         | HLA12059  |                                               | 0   | 0   | 5    | 0    | 0   | 0   | 0   | 5     |                                                      |     | WD   |      |     |     |     | WD    | WD                |  |
| DRB1*13:195                                                 | 13:195         | HLA12811  |                                               | 2   | 0   | 0    | 0    | 0   | 0   | 0   | 2     |                                                      |     |      |      |     |     |     |       |                   |  |
| DRB1*13:197                                                 | 13:197         | HLA12890  |                                               | 0   | 0   | 1    | 0    | 0   | 0   | 0   | 1     |                                                      |     |      |      |     |     |     |       |                   |  |
| DRB1*13:200N                                                | 13:200N        | HLA13052  |                                               | 0   | 0   | 2    | 0    | 0   | 0   | 0   | 2     |                                                      |     |      |      |     |     |     |       |                   |  |
| DRB1*13:205                                                 | 13:205         | HLA13893  |                                               | 0   | 0   | 2    | 0    | 0   | 0   | 0   | 2     |                                                      |     |      |      |     |     |     |       |                   |  |
| DRB1*13:211                                                 | 13:211         | HLA14358  |                                               | 0   | 0   | 0    | 0    | 0   | 1   | 0   | 1     |                                                      |     |      |      |     |     |     |       |                   |  |
| DRB1*13:222                                                 | 13:222         | HLA15702  |                                               | 0   | 2   | 0    | 0    | 0   | 0   | 0   | 2     |                                                      |     |      |      |     |     |     |       |                   |  |

| Supplemental Table 11: HLA-DRB1 Allele Summary <sup>a</sup> |                        |           | Allele Count by Population Group <sup>b</sup> |             |              |               |              |              |             |              |               | 3.0.0 CIWD Category by Population Group <sup>c</sup> |          |          |          |           |          |          |          |                   |
|-------------------------------------------------------------|------------------------|-----------|-----------------------------------------------|-------------|--------------|---------------|--------------|--------------|-------------|--------------|---------------|------------------------------------------------------|----------|----------|----------|-----------|----------|----------|----------|-------------------|
| Allele                                                      | Genomic Typing         | Allele ID | G group                                       | AFA         | API          | EURO          | MENA         | HIS          | NAM         | UNK          | Total         | AFA                                                  | API      | EURO     | MENA     | HIS       | NAM      | UNK      | Total    | Highest Frequency |
| DRB1*13:224                                                 | 13:224                 | HLA15704  |                                               | 0           | 0            | 2             | 0            | 1            | 0           | 1            | 4             |                                                      |          |          |          |           |          |          |          |                   |
| DRB1*13:234                                                 | 13:234                 | HLA17038  |                                               | 0           | 0            | 1             | 0            | 0            | 0           | 0            | 1             |                                                      |          |          |          |           |          |          |          |                   |
| DRB1*13:237                                                 | 13:237                 | HLA17169  |                                               | 0           | 0            | 1             | 0            | 0            | 0           | 1            | 2             |                                                      |          |          |          |           |          |          |          |                   |
| DRB1*13:CODE                                                | 13:CODE                |           |                                               | 4368        | 1200         | 55181         | 1419         | 4891         | 301         | 6460         | 73820         | NA                                                   | NA       | NA       | NA       | NA        | NA       | NA       | NA       | NA                |
| <b>DRB1*14:01 total</b>                                     | <b>14:01 total</b>     |           |                                               | <b>6649</b> | <b>20054</b> | <b>294608</b> | <b>16557</b> | <b>12321</b> | <b>1128</b> | <b>35212</b> | <b>386529</b> | <b>C</b>                                             | <b>C</b> | <b>C</b> | <b>C</b> | <b>C</b>  | <b>C</b> | <b>C</b> | <b>C</b> | <b>C</b>          |
| DRB1*14:01                                                  | 14:01                  |           |                                               | 0           | 0            | 455           | 3            | 1            | 0           | 44           | 503           |                                                      |          | I        |          |           |          | I        | I        | I                 |
| DRB1*14:01P                                                 | 14:01P                 |           |                                               | 0           | 2            | 2053          | 4            | 4            | 0           | 7            | 2070          |                                                      |          | C        |          |           |          | WD       | C        | C                 |
| <b>DRB1*14:01:01G total</b>                                 | <b>14:01:01G total</b> |           |                                               | <b>6643</b> | <b>20043</b> | <b>291535</b> | <b>16545</b> | <b>12314</b> | <b>1128</b> | <b>35108</b> | <b>383316</b> | <b>C</b>                                             | <b>C</b> | <b>C</b> | <b>C</b> | <b>C</b>  | <b>C</b> | <b>C</b> | <b>C</b> | <b>C</b>          |
| DRB1*14:01:01G                                              | 14:01:01G              |           | 14:01:01G                                     | 3630        | 13560        | 93537         | 5152         | 7336         | 746         | 28260        | 152221        | C                                                    | C        | C        | C        | C         | C        | C        | C        | C                 |
| DRB1*14:01:01                                               | 14:01:01               | HLA00833  | 14:01:01G                                     | 72          | 185          | 21072         | 3626         | 549          | 32          | 577          | 26113         | C                                                    | C        | C        | C        | C         | C        | C        | C        | C                 |
| DRB1*14:54:01                                               | 14:54:01               |           | 14:01:01G                                     | 2941        | 6297         | 176926        | 7767         | 4429         | 350         | 6271         | 204981        | C                                                    | C        | C        | C        | C         | C        | C        | C        | C                 |
| DRB1*14:54:06                                               | 14:54:06               | HLA16357  | 14:01:01G                                     | 0           | 1            | 0             | 0            | 0            | 0           | 0            | 1             |                                                      |          |          |          |           |          |          |          |                   |
| DRB1*14:01:02                                               | 14:01:02               | HLA01278  |                                               | 6           | 2            | 29            | 3            | 1            | 0           | 2            | 43            | WD                                                   |          | WD       |          |           |          |          | WD       | WD                |
| DRB1*14:01:04                                               | 14:01:04               | HLA09343  |                                               | 0           | 0            | 1             | 0            | 0            | 0           | 0            | 1             |                                                      |          |          |          |           |          |          |          |                   |
| <b>DRB1*14:54 total</b>                                     | <b>14:54 total</b>     |           |                                               | <b>2941</b> | <b>6305</b>  | <b>177461</b> | <b>7769</b>  | <b>4430</b>  | <b>350</b>  | <b>6322</b>  | <b>205578</b> | <b>C</b>                                             | <b>C</b> | <b>C</b> | <b>C</b> | <b>C</b>  | <b>C</b> | <b>C</b> | <b>C</b> | <b>C</b>          |
| DRB1*14:54                                                  | 14:54                  |           |                                               | 0           | 6            | 532           | 2            | 1            | 0           | 48           | 589           |                                                      | WD       | I        |          |           |          | I        | I        | I                 |
| DRB1*14:54:02                                               | 14:54:02               | HLA07561  |                                               | 0           | 0            | 3             | 0            | 0            | 0           | 3            | 6             |                                                      |          |          |          |           |          |          | WD       | WD                |
| DRB1*14:54:04                                               | 14:54:04               | HLA11933  |                                               | 0           | 1            | 0             | 0            | 0            | 0           | 0            | 1             |                                                      |          |          |          |           |          |          |          |                   |
| <b>DRB1*14:02 total</b>                                     | <b>14:02 total</b>     |           |                                               | <b>428</b>  | <b>775</b>   | <b>4300</b>   | <b>65</b>    | <b>14390</b> | <b>1921</b> | <b>5361</b>  | <b>27240</b>  | <b>C</b>                                             | <b>C</b> | <b>C</b> | <b>C</b> | <b>C</b>  | <b>C</b> | <b>C</b> | <b>C</b> | <b>C</b>          |
| DRB1*14:02                                                  | 14:02                  |           |                                               | 202         | 201          | 1986          | 24           | 5710         | 899         | 2099         | 11121         | C                                                    | C        | C        | WD       | C         | C        | C        | C        | C                 |
| DRB1*14:02P                                                 | 14:02P                 |           |                                               | 0           | 0            | 1             | 0            | 0            | 0           | 0            | 1             |                                                      |          |          |          |           |          |          |          |                   |
| <b>DRB1*14:02:01G total</b>                                 | <b>14:02:01G total</b> |           |                                               | <b>226</b>  | <b>574</b>   | <b>2305</b>   | <b>41</b>    | <b>8664</b>  | <b>1022</b> | <b>3254</b>  | <b>16086</b>  | <b>C</b>                                             | <b>C</b> | <b>C</b> | <b>C</b> | <b>C</b>  | <b>C</b> | <b>C</b> | <b>C</b> | <b>C</b>          |
| DRB1*14:02:01G                                              | 14:02:01G              |           | 14:02:01G                                     | 0           | 331          | 0             | 0            | 0            | 0           | 0            | 331           |                                                      | C        |          |          |           |          |          | I        | C                 |
| DRB1*14:02:01                                               | 14:02:01               |           | 14:02:01G                                     | 226         | 243          | 2305          | 41           | 8664         | 1022        | 3254         | 15755         | C                                                    | C        | C        | C        | C         | C        | C        | C        | C                 |
| DRB1*14:02:02                                               | 14:02:02               | HLA11176  |                                               | 0           | 0            | 8             | 0            | 16           | 0           | 8            | 32            |                                                      |          | WD       |          | I         |          | WD       | WD       | I                 |
| <b>DRB1*14:03 total</b>                                     | <b>14:03 total</b>     |           |                                               | <b>2</b>    | <b>1252</b>  | <b>573</b>    | <b>291</b>   | <b>6</b>     | <b>1</b>    | <b>282</b>   | <b>2407</b>   |                                                      | <b>C</b> | <b>I</b> | <b>C</b> | <b>WD</b> |          | <b>C</b> | <b>C</b> | <b>C</b>          |
| DRB1*14:03                                                  | 14:03                  |           |                                               | 0           | 75           | 21            | 11           | 0            | 0           | 20           | 127           |                                                      | I        | WD       | WD       |           |          | I        | WD       | I                 |
| DRB1*14:03:01                                               | 14:03:01               | HLA00835  |                                               | 2           | 1177         | 552           | 280          | 6            | 1           | 262          | 2280          |                                                      | C        | I        | C        | WD        |          | C        | C        | C                 |
| <b>DRB1*14:04 total</b>                                     | <b>14:04 total</b>     |           |                                               | <b>297</b>  | <b>82950</b> | <b>11308</b>  | <b>2121</b>  | <b>517</b>   | <b>242</b>  | <b>3019</b>  | <b>100454</b> | <b>C</b>                                             | <b>C</b> | <b>C</b> | <b>C</b> | <b>C</b>  | <b>C</b> | <b>C</b> | <b>C</b> | <b>C</b>          |
| DRB1*14:04                                                  | 14:04                  |           |                                               | 169         | 24319        | 5300          | 1052         | 271          | 139         | 1324         | 32574         | C                                                    | C        | C        | C        | C         | C        | C        | C        | C                 |
| DRB1*14:04P                                                 | 14:04P                 |           |                                               | 0           | 0            | 8             | 0            | 0            | 0           | 0            | 8             |                                                      |          | WD       |          |           |          |          | WD       | WD                |

| Supplemental Table 11: HLA-DRB1 Allele Summary <sup>a</sup> |                        |           | Allele Count by Population Group <sup>b</sup> |            |             |             |            |              |            |             |              | 3.0.0 CIWD Category by Population Group <sup>c</sup> |          |           |          |          |          |           |          |                   |
|-------------------------------------------------------------|------------------------|-----------|-----------------------------------------------|------------|-------------|-------------|------------|--------------|------------|-------------|--------------|------------------------------------------------------|----------|-----------|----------|----------|----------|-----------|----------|-------------------|
| Allele                                                      | Genomic Typing         | Allele ID | G group                                       | AFA        | API         | EURO        | MENA       | HIS          | NAM        | UNK         | Total        | AFA                                                  | API      | EURO      | MENA     | HIS      | NAM      | UNK       | Total    | Highest Frequency |
| DRB1*14:04:01                                               | 14:04:01               | HLA00836  |                                               | 128        | 58628       | 6000        | 1069       | 246          | 103        | 1695        | 67869        | C                                                    | C        | C         | C        | C        | C        | C         | C        | C                 |
| DRB1*14:04:03                                               | 14:04:03               | HLA14050  |                                               | 0          | 3           | 0           | 0          | 0            | 0          | 0           | 3            |                                                      |          |           |          |          |          |           |          |                   |
| <b>DRB1*14:05 total</b>                                     | <b>14:05 total</b>     |           |                                               | <b>9</b>   | <b>6028</b> | <b>616</b>  | <b>224</b> | <b>21</b>    | <b>2</b>   | <b>780</b>  | <b>7680</b>  | <b>WD</b>                                            | <b>C</b> | <b>I</b>  | <b>C</b> | <b>I</b> |          | <b>C</b>  | <b>C</b> | <b>C</b>          |
| DRB1*14:05                                                  | 14:05                  |           |                                               | 0          | 418         | 35          | 14         | 6            | 0          | 59          | 532          |                                                      | C        | WD        | WD       | WD       |          | I         | I        | C                 |
| <b>DRB1*14:05:01G total</b>                                 | <b>14:05:01G total</b> |           |                                               | <b>9</b>   | <b>5608</b> | <b>581</b>  | <b>210</b> | <b>15</b>    | <b>2</b>   | <b>721</b>  | <b>7146</b>  | <b>WD</b>                                            | <b>C</b> | <b>I</b>  | <b>C</b> | <b>I</b> |          | <b>C</b>  | <b>C</b> | <b>C</b>          |
| DRB1*14:05:01G                                              | 14:05:01G              |           | 14:05:01G                                     | 1          | 558         | 39          | 10         | 0            | 0          | 2           | 610          |                                                      | C        | WD        | WD       |          |          |           | I        | C                 |
| DRB1*14:05:01                                               | 14:05:01               |           | 14:05:01G                                     | 8          | 5050        | 542         | 200        | 15           | 2          | 719         | 6536         | WD                                                   | C        | I         | C        | I        |          | C         | C        | C                 |
| DRB1*14:05:02                                               | 14:05:02               | HLA01663  |                                               | 0          | 2           | 0           | 0          | 0            | 0          | 0           | 2            |                                                      |          |           |          |          |          |           |          |                   |
| <b>DRB1*14:06 total</b>                                     | <b>14:06 total</b>     |           |                                               | <b>216</b> | <b>951</b>  | <b>2097</b> | <b>379</b> | <b>18560</b> | <b>964</b> | <b>3474</b> | <b>26641</b> | <b>C</b>                                             | <b>C</b> | <b>C</b>  | <b>C</b> | <b>C</b> | <b>C</b> | <b>C</b>  | <b>C</b> | <b>C</b>          |
| DRB1*14:06                                                  | 14:06                  |           |                                               | 20         | 81          | 277         | 26         | 2592         | 108        | 308         | 3412         | WD                                                   | I        | I         | WD       | C        | C        | C         | C        | C                 |
| DRB1*14:06P                                                 | 14:06P                 |           |                                               | 0          | 0           | 2           | 0          | 0            | 0          | 0           | 2            |                                                      |          |           |          |          |          |           |          |                   |
| DRB1*14:06:01                                               | 14:06:01               | HLA00838  |                                               | 196        | 870         | 1783        | 353        | 15938        | 856        | 3123        | 23119        | C                                                    | C        | C         | C        | C        | C        | C         | C        | C                 |
| DRB1*14:06:02                                               | 14:06:02               | HLA04354  |                                               | 0          | 0           | 35          | 0          | 30           | 0          | 43          | 108          |                                                      |          | WD        |          | I        |          | I         | WD       | I                 |
| <b>DRB1*14:07 total</b>                                     | <b>14:07 total</b>     |           |                                               | <b>31</b>  | <b>1648</b> | <b>2849</b> | <b>481</b> | <b>706</b>   | <b>27</b>  | <b>475</b>  | <b>6217</b>  | <b>WD</b>                                            | <b>C</b> | <b>C</b>  | <b>C</b> | <b>C</b> | <b>C</b> | <b>C</b>  | <b>C</b> | <b>C</b>          |
| DRB1*14:07                                                  | 14:07                  |           |                                               | 2          | 41          | 249         | 28         | 98           | 2          | 28          | 448          |                                                      | I        | I         | WD       | C        |          | I         | I        | C                 |
| DRB1*14:07P                                                 | 14:07P                 |           |                                               | 0          | 0           | 1           | 0          | 0            | 0          | 0           | 1            |                                                      |          |           |          |          |          |           |          |                   |
| DRB1*14:07:01                                               | 14:07:01               | HLA00839  |                                               | 28         | 1607        | 1901        | 453        | 605          | 22         | 422         | 5038         | WD                                                   | C        | C         | C        | C        | C        | C         | C        | C                 |
| DRB1*14:07:02                                               | 14:07:02               | HLA01531  |                                               | 1          | 0           | 698         | 0          | 3            | 3          | 25          | 730          |                                                      |          | I         |          |          |          | I         | I        | I                 |
| DRB1*14:08                                                  | 14:08                  | HLA00840  |                                               | 1          | 211         | 16          | 0          | 1            | 0          | 265         | 494          |                                                      | C        | WD        |          |          |          | C         | I        | C                 |
| DRB1*14:09                                                  | 14:09                  | HLA00841  |                                               | 0          | 46          | 3           | 0          | 0            | 0          | 1           | 50           |                                                      | I        |           |          |          |          |           | WD       | I                 |
| DRB1*14:10                                                  | 14:10                  | HLA00842  |                                               | 4          | 903         | 13          | 3          | 0            | 9          | 27          | 959          |                                                      | C        | WD        |          |          | C        | I         | I        | C                 |
| DRB1*14:11                                                  | 14:11                  | HLA00843  |                                               | 1          | 273         | 94          | 5          | 7            | 0          | 11          | 391          |                                                      | C        | WD        | WD       | WD       |          | WD        | I        | C                 |
| <b>DRB1*14:12 total</b>                                     | <b>14:12 total</b>     |           |                                               | <b>0</b>   | <b>79</b>   | <b>83</b>   | <b>118</b> | <b>3</b>     | <b>0</b>   | <b>13</b>   | <b>296</b>   |                                                      | <b>I</b> | <b>WD</b> | <b>C</b> |          |          | <b>WD</b> | <b>I</b> | <b>C</b>          |
| DRB1*14:12                                                  | 14:12                  |           |                                               | 0          | 6           | 6           | 16         | 0            | 0          | 3           | 31           |                                                      | WD       | WD        | WD       |          |          |           | WD       | WD                |
| DRB1*14:12:01                                               | 14:12:01               | HLA00844  |                                               | 0          | 73          | 77          | 102        | 3            | 0          | 10          | 265          |                                                      | I        | WD        | C        |          |          | WD        | I        | C                 |
| DRB1*14:13                                                  | 14:13                  | HLA00845  |                                               | 1          | 0           | 6           | 0          | 17           | 0          | 13          | 37           |                                                      |          | WD        |          | I        |          | WD        | WD       | I                 |
| DRB1*14:15                                                  | 14:15                  | HLA00847  |                                               | 5          | 2495        | 21          | 12         | 1            | 7          | 40          | 2581         | WD                                                   | C        | WD        | WD       |          | C        | I         | C        | C                 |
| DRB1*14:16                                                  | 14:16                  | HLA00848  |                                               | 0          | 0           | 236         | 7          | 2            | 0          | 25          | 270          |                                                      |          | I         | WD       |          |          | I         | I        | I                 |
| DRB1*14:17                                                  | 14:17                  | HLA00849  |                                               | 2          | 12          | 413         | 58         | 24           | 0          | 53          | 562          |                                                      | WD       | I         | C        | I        |          | I         | I        | C                 |
| DRB1*14:18                                                  | 14:18                  | HLA00850  |                                               | 0          | 290         | 9           | 0          | 0            | 0          | 14          | 313          |                                                      | C        | WD        |          |          |          | I         | I        | C                 |
| DRB1*14:19                                                  | 14:19                  | HLA00851  |                                               | 5          | 212         | 40          | 3          | 1            | 2          | 9           | 272          | WD                                                   | C        | WD        |          |          |          | WD        | I        | C                 |

| Supplemental Table 11: HLA-DRB1 Allele Summary <sup>a</sup> |                    |           | Allele Count by Population Group <sup>b</sup> |          |           |           |          |          |          |          |           | 3.0.0 CIWD Category by Population Group <sup>c</sup> |     |           |      |     |     |           |           |                   |
|-------------------------------------------------------------|--------------------|-----------|-----------------------------------------------|----------|-----------|-----------|----------|----------|----------|----------|-----------|------------------------------------------------------|-----|-----------|------|-----|-----|-----------|-----------|-------------------|
| Allele                                                      | Genomic Typing     | Allele ID | G group                                       | AFA      | API       | EURO      | MENA     | HIS      | NAM      | UNK      | Total     | AFA                                                  | API | EURO      | MENA | HIS | NAM | UNK       | Total     | Highest Frequency |
| DRB1*14:20                                                  | 14:20              | HLA00852  |                                               | 0        | 3         | 105       | 2        | 1        | 0        | 7        | 118       |                                                      |     | WD        |      |     |     | WD        | WD        | WD                |
| DRB1*14:21                                                  | 14:21              | HLA00853  |                                               | 0        | 0         | 86        | 0        | 4        | 1        | 6        | 97        |                                                      |     | WD        |      |     |     | WD        | WD        | WD                |
| DRB1*14:22                                                  | 14:22              | HLA00854  |                                               | 0        | 70        | 3         | 0        | 0        | 0        | 6        | 79        |                                                      | I   |           |      |     |     | WD        | WD        | I                 |
| <b>DRB1*14:23 total</b>                                     | <b>14:23 total</b> |           |                                               | <b>1</b> | <b>4</b>  | <b>77</b> | <b>4</b> | <b>3</b> | <b>1</b> | <b>6</b> | <b>96</b> |                                                      |     | <b>WD</b> |      |     |     | <b>WD</b> | <b>WD</b> | <b>WD</b>         |
| DRB1*14:23                                                  | 14:23              |           |                                               | 0        | 0         | 8         | 2        | 0        | 0        | 0        | 10        |                                                      |     | WD        |      |     |     |           | WD        | WD                |
| DRB1*14:23:01                                               | 14:23:01           | HLA00855  |                                               | 1        | 1         | 68        | 2        | 3        | 1        | 5        | 81        |                                                      |     | WD        |      |     |     | WD        | WD        | WD                |
| DRB1*14:23:03                                               | 14:23:03           | HLA04007  |                                               | 0        | 3         | 0         | 0        | 0        | 0        | 0        | 3         |                                                      |     |           |      |     |     |           |           |                   |
| DRB1*14:23:04                                               | 14:23:04           | HLA08865  |                                               | 0        | 0         | 1         | 0        | 0        | 0        | 1        | 2         |                                                      |     |           |      |     |     |           |           |                   |
| DRB1*14:24                                                  | 14:24              | HLA00856  |                                               | 3        | 4         | 16        | 0        | 244      | 13       | 26       | 306       |                                                      |     | WD        |      | C   | C   | I         | I         | C                 |
| DRB1*14:25                                                  | 14:25              | HLA00857  |                                               | 0        | 44        | 8         | 0        | 0        | 0        | 0        | 52        |                                                      | I   | WD        |      |     |     |           | WD        | I                 |
| DRB1*14:26                                                  | 14:26              | HLA00858  |                                               | 0        | 1         | 0         | 0        | 0        | 0        | 0        | 1         |                                                      |     |           |      |     |     |           |           |                   |
| <b>DRB1*14:27 total</b>                                     | <b>14:27 total</b> |           |                                               | <b>0</b> | <b>1</b>  | <b>1</b>  | <b>0</b> | <b>3</b> | <b>0</b> | <b>2</b> | <b>7</b>  |                                                      |     |           |      |     |     |           | <b>WD</b> | <b>WD</b>         |
| DRB1*14:27                                                  | 14:27              |           |                                               | 0        | 1         | 1         | 0        | 3        | 0        | 2        | 7         |                                                      |     |           |      |     |     |           | WD        | WD                |
| DRB1*14:28                                                  | 14:28              | HLA00860  |                                               | 0        | 72        | 2         | 0        | 0        | 0        | 4        | 78        |                                                      | I   |           |      |     |     |           | WD        | I                 |
| DRB1*14:29                                                  | 14:29              | HLA00861  |                                               | 0        | 1         | 0         | 0        | 0        | 0        | 1        | 2         |                                                      |     |           |      |     |     |           |           |                   |
| DRB1*14:31                                                  | 14:31              | HLA00863  |                                               | 0        | 4         | 0         | 0        | 0        | 0        | 0        | 4         |                                                      |     |           |      |     |     |           |           |                   |
| <b>DRB1*14:32 total</b>                                     | <b>14:32 total</b> |           |                                               | <b>0</b> | <b>0</b>  | <b>8</b>  | <b>1</b> | <b>0</b> | <b>0</b> | <b>3</b> | <b>12</b> |                                                      |     | <b>WD</b> |      |     |     |           | <b>WD</b> | <b>WD</b>         |
| DRB1*14:32                                                  | 14:32              |           |                                               | 0        | 0         | 1         | 1        | 0        | 0        | 0        | 2         |                                                      |     |           |      |     |     |           |           |                   |
| DRB1*14:32:01                                               | 14:32:01           | HLA00864  |                                               | 0        | 0         | 1         | 0        | 0        | 0        | 0        | 1         |                                                      |     |           |      |     |     |           |           |                   |
| DRB1*14:32:02                                               | 14:32:02           | HLA03109  |                                               | 0        | 0         | 6         | 0        | 0        | 0        | 3        | 9         |                                                      |     | WD        |      |     |     |           | WD        | WD                |
| DRB1*14:33                                                  | 14:33              | HLA01011  |                                               | 0        | 52        | 19        | 31       | 1        | 0        | 5        | 108       |                                                      | I   | WD        | WD   |     |     | WD        | WD        | I                 |
| DRB1*14:35                                                  | 14:35              | HLA01161  |                                               | 0        | 5         | 10        | 0        | 0        | 0        | 0        | 15        |                                                      | WD  | WD        |      |     |     |           | WD        | WD                |
| <b>DRB1*14:38 total</b>                                     | <b>14:38 total</b> |           |                                               | <b>0</b> | <b>0</b>  | <b>1</b>  | <b>3</b> | <b>0</b> | <b>0</b> | <b>0</b> | <b>4</b>  |                                                      |     |           |      |     |     |           |           |                   |
| DRB1*14:38                                                  | 14:38              |           |                                               | 0        | 0         | 1         | 1        | 0        | 0        | 0        | 2         |                                                      |     |           |      |     |     |           |           |                   |
| DRB1*14:38:01                                               | 14:38:01           | HLA01378  |                                               | 0        | 0         | 0         | 2        | 0        | 0        | 0        | 2         |                                                      |     |           |      |     |     |           |           |                   |
| DRB1*14:41                                                  | 14:41              | HLA01500  |                                               | 1        | 0         | 2         | 0        | 5        | 3        | 5        | 16        |                                                      |     |           |      | WD  |     | WD        | WD        | WD                |
| <b>DRB1*14:44 total</b>                                     | <b>14:44 total</b> |           |                                               | <b>0</b> | <b>13</b> | <b>0</b>  | <b>0</b> | <b>0</b> | <b>0</b> | <b>0</b> | <b>13</b> |                                                      |     | <b>WD</b> |      |     |     |           | <b>WD</b> | <b>WD</b>         |
| DRB1*14:44:01                                               | 14:44:01           | HLA01629  |                                               | 0        | 10        | 0         | 0        | 0        | 0        | 0        | 10        |                                                      | WD  |           |      |     |     |           | WD        | WD                |
| DRB1*14:44:02                                               | 14:44:02           | HLA03036  |                                               | 0        | 3         | 0         | 0        | 0        | 0        | 0        | 3         |                                                      |     |           |      |     |     |           |           |                   |
| DRB1*14:45                                                  | 14:45              | HLA01630  |                                               | 0        | 2         | 0         | 0        | 0        | 0        | 0        | 2         |                                                      |     |           |      |     |     |           |           |                   |
| DRB1*14:46                                                  | 14:46              | HLA01693  |                                               | 0        | 0         | 0         | 0        | 5        | 0        | 0        | 5         |                                                      |     |           |      | WD  |     |           | WD        | WD                |



| Supplemental Table 11: HLA-DRB1 Allele Summary <sup>a</sup> |                    |           | Allele Count by Population Group <sup>b</sup> |          |           |          |          |          |          |          |           | 3.0.0 CIWD Category by Population Group <sup>c</sup> |          |      |      |     |     |     |           |                   |
|-------------------------------------------------------------|--------------------|-----------|-----------------------------------------------|----------|-----------|----------|----------|----------|----------|----------|-----------|------------------------------------------------------|----------|------|------|-----|-----|-----|-----------|-------------------|
| Allele                                                      | Genomic Typing     | Allele ID | G group                                       | AFA      | API       | EURO     | MENA     | HIS      | NAM      | UNK      | Total     | AFA                                                  | API      | EURO | MENA | HIS | NAM | UNK | Total     | Highest Frequency |
| DRB1*14:47                                                  | 14:47              | HLA01733  |                                               | 0        | 0         | 50       | 0        | 0        | 3        | 3        | 56        |                                                      |          | WD   |      |     |     |     | WD        | WD                |
| DRB1*14:48                                                  | 14:48              | HLA01734  |                                               | 0        | 2         | 11       | 2        | 72       | 5        | 20       | 112       |                                                      |          | WD   |      | C   | WD  | I   | WD        | C                 |
| DRB1*14:49                                                  | 14:49              | HLA02131  |                                               | 0        | 1         | 0        | 0        | 0        | 0        | 0        | 1         |                                                      |          |      |      |     |     |     |           |                   |
| DRB1*14:50                                                  | 14:50              | HLA02210  |                                               | 1        | 11        | 1        | 0        | 0        | 6        | 1        | 20        |                                                      | WD       |      |      |     | WD  |     | WD        | WD                |
| DRB1*14:52                                                  | 14:52              | HLA02215  |                                               | 0        | 0         | 1        | 0        | 5        | 0        | 3        | 9         |                                                      |          |      |      | WD  |     |     | WD        | WD                |
| DRB1*14:53                                                  | 14:53              | HLA02348  |                                               | 0        | 0         | 1        | 0        | 0        | 0        | 0        | 1         |                                                      |          |      |      |     |     |     |           |                   |
| DRB1*14:55                                                  | 14:55              | HLA02409  |                                               | 0        | 0         | 4        | 0        | 0        | 0        | 0        | 4         |                                                      |          |      |      |     |     |     |           |                   |
| DRB1*14:58                                                  | 14:58              | HLA02487  |                                               | 0        | 0         | 6        | 0        | 0        | 0        | 0        | 6         |                                                      |          | WD   |      |     |     |     | WD        | WD                |
| DRB1*14:59                                                  | 14:59              | HLA02520  |                                               | 0        | 0         | 2        | 0        | 0        | 0        | 0        | 2         |                                                      |          |      |      |     |     |     |           |                   |
| DRB1*14:60                                                  | 14:60              | HLA02563  |                                               | 0        | 0         | 10       | 0        | 0        | 0        | 1        | 11        |                                                      |          | WD   |      |     |     |     | WD        | WD                |
| DRB1*14:61                                                  | 14:61              | HLA02572  |                                               | 0        | 18        | 2        | 0        | 0        | 0        | 3        | 23        |                                                      | I        |      |      |     |     |     | WD        | I                 |
| DRB1*14:64                                                  | 14:64              | HLA02728  |                                               | 0        | 0         | 1        | 0        | 0        | 0        | 0        | 1         |                                                      |          |      |      |     |     |     |           |                   |
| <b>DRB1*14:68 total</b>                                     | <b>14:68 total</b> |           |                                               | <b>0</b> | <b>14</b> | <b>0</b> | <b>0</b> | <b>0</b> | <b>0</b> | <b>0</b> | <b>14</b> |                                                      | <b>I</b> |      |      |     |     |     | <b>WD</b> | <b>I</b>          |
| DRB1*14:68                                                  | 14:68              |           |                                               | 0        | 3         | 0        | 0        | 0        | 0        | 0        | 3         |                                                      |          |      |      |     |     |     |           |                   |
| DRB1*14:68:01                                               | 14:68:01           | HLA02923  |                                               | 0        | 11        | 0        | 0        | 0        | 0        | 0        | 11        |                                                      | WD       |      |      |     |     |     | WD        | WD                |
| DRB1*14:69                                                  | 14:69              | HLA03039  |                                               | 0        | 25        | 0        | 0        | 0        | 0        | 0        | 25        |                                                      | I        |      |      |     |     |     | WD        | I                 |
| DRB1*14:70                                                  | 14:70              | HLA03041  |                                               | 1        | 1         | 70       | 0        | 0        | 0        | 11       | 83        |                                                      |          | WD   |      |     |     | WD  | WD        | WD                |
| DRB1*14:73                                                  | 14:73              | HLA03044  |                                               | 0        | 4         | 0        | 0        | 0        | 0        | 0        | 4         |                                                      |          |      |      |     |     |     |           |                   |
| DRB1*14:74                                                  | 14:74              | HLA03052  |                                               | 0        | 0         | 1        | 0        | 0        | 0        | 0        | 1         |                                                      |          |      |      |     |     |     |           |                   |
| DRB1*14:75                                                  | 14:75              | HLA03194  |                                               | 0        | 0         | 8        | 0        | 0        | 0        | 1        | 9         |                                                      |          | WD   |      |     |     |     | WD        | WD                |
| DRB1*14:76                                                  | 14:76              | HLA03227  |                                               | 0        | 2         | 0        | 0        | 0        | 0        | 0        | 2         |                                                      |          |      |      |     |     |     |           |                   |
| DRB1*14:79                                                  | 14:79              | HLA03325  |                                               | 0        | 3         | 3        | 0        | 0        | 0        | 0        | 6         |                                                      |          |      |      |     |     |     | WD        | WD                |
| DRB1*14:82                                                  | 14:82              | HLA03446  |                                               | 0        | 0         | 4        | 0        | 0        | 0        | 0        | 4         |                                                      |          |      |      |     |     |     |           |                   |
| DRB1*14:83                                                  | 14:83              | HLA03461  |                                               | 1        | 0         | 1        | 0        | 1        | 0        | 1        | 4         |                                                      |          |      |      |     |     |     |           |                   |
| DRB1*14:86                                                  | 14:86              | HLA03764  |                                               | 0        | 0         | 5        | 0        | 1        | 0        | 0        | 6         |                                                      |          | WD   |      |     |     |     | WD        | WD                |
| DRB1*14:87                                                  | 14:87              | HLA03845  |                                               | 0        | 0         | 27       | 0        | 0        | 0        | 0        | 27        |                                                      |          | WD   |      |     |     |     | WD        | WD                |
| DRB1*14:88                                                  | 14:88              | HLA03849  |                                               | 0        | 0         | 0        | 2        | 0        | 0        | 0        | 2         |                                                      |          |      |      |     |     |     |           |                   |
| DRB1*14:89                                                  | 14:89              | HLA03862  |                                               | 0        | 0         | 4        | 0        | 0        | 0        | 0        | 4         |                                                      |          |      |      |     |     |     |           |                   |
| DRB1*14:90                                                  | 14:90              | HLA03863  |                                               | 0        | 0         | 1        | 4        | 0        | 0        | 1        | 6         |                                                      |          |      |      |     |     |     | WD        | WD                |
| DRB1*14:94                                                  | 14:94              | HLA04409  |                                               | 0        | 0         | 0        | 0        | 2        | 0        | 0        | 2         |                                                      |          |      |      |     |     |     |           |                   |
| DRB1*14:95                                                  | 14:95              | HLA04614  |                                               | 0        | 0         | 6        | 0        | 0        | 0        | 0        | 6         |                                                      |          | WD   |      |     |     |     | WD        | WD                |

| Supplemental Table 11: HLA-DRB1 Allele Summary <sup>a</sup> |                     |           | Allele Count by Population Group <sup>b</sup> |          |           |          |          |          |          |          |           | 3.0.0 CIWD Category by Population Group <sup>c</sup> |          |      |      |     |     |     |           |                   |
|-------------------------------------------------------------|---------------------|-----------|-----------------------------------------------|----------|-----------|----------|----------|----------|----------|----------|-----------|------------------------------------------------------|----------|------|------|-----|-----|-----|-----------|-------------------|
| Allele                                                      | Genomic Typing      | Allele ID | G group                                       | AFA      | API       | EURO     | MENA     | HIS      | NAM      | UNK      | Total     | AFA                                                  | API      | EURO | MENA | HIS | NAM | UNK | Total     | Highest Frequency |
| DRB1*14:96                                                  | 14:96               | HLA04581  |                                               | 0        | 1         | 0        | 0        | 0        | 0        | 0        | 1         |                                                      |          |      |      |     |     |     |           |                   |
| DRB1*14:97                                                  | 14:97               | HLA04687  |                                               | 0        | 0         | 15       | 0        | 0        | 0        | 1        | 16        |                                                      |          | WD   |      |     |     |     | WD        | WD                |
| DRB1*14:99                                                  | 14:99               | HLA04782  |                                               | 0        | 0         | 8        | 0        | 0        | 0        | 0        | 8         |                                                      |          | WD   |      |     |     |     | WD        | WD                |
| DRB1*14:101                                                 | 14:101              | HLA06010  |                                               | 0        | 1         | 5        | 1        | 0        | 0        | 0        | 7         |                                                      |          | WD   |      |     |     |     | WD        | WD                |
| DRB1*14:106                                                 | 14:106              | HLA06299  |                                               | 0        | 0         | 1        | 0        | 5        | 0        | 1        | 7         |                                                      |          |      |      | WD  |     |     | WD        | WD                |
| DRB1*14:108                                                 | 14:108              | HLA06308  |                                               | 0        | 0         | 0        | 0        | 2        | 0        | 0        | 2         |                                                      |          |      |      |     |     |     |           |                   |
| DRB1*14:109                                                 | 14:109              | HLA06309  |                                               | 0        | 0         | 1        | 0        | 3        | 0        | 6        | 10        |                                                      |          |      |      |     |     | WD  | WD        | WD                |
| DRB1*14:110                                                 | 14:110              | HLA06480  |                                               | 0        | 0         | 0        | 6        | 0        | 0        | 0        | 6         |                                                      |          |      | WD   |     |     |     | WD        | WD                |
| DRB1*14:111                                                 | 14:111              | HLA06481  |                                               | 0        | 0         | 6        | 0        | 0        | 0        | 1        | 7         |                                                      |          | WD   |      |     |     |     | WD        | WD                |
| DRB1*14:114                                                 | 14:114              | HLA06775  |                                               | 5        | 0         | 0        | 0        | 0        | 0        | 0        | 5         | WD                                                   |          |      |      |     |     |     | WD        | WD                |
| DRB1*14:117                                                 | 14:117              | HLA06907  |                                               | 0        | 0         | 1        | 0        | 0        | 0        | 0        | 1         |                                                      |          |      |      |     |     |     |           |                   |
| DRB1*14:119                                                 | 14:119              | HLA07172  |                                               | 0        | 1         | 0        | 0        | 0        | 0        | 0        | 1         |                                                      |          |      |      |     |     |     |           |                   |
| DRB1*14:122                                                 | 14:122              | HLA07381  |                                               | 0        | 1         | 3        | 0        | 0        | 0        | 1        | 5         |                                                      |          |      |      |     |     |     | WD        | WD                |
| DRB1*14:123                                                 | 14:123              | HLA07513  |                                               | 0        | 0         | 2        | 0        | 0        | 0        | 0        | 2         |                                                      |          |      |      |     |     |     |           |                   |
| <b>DRB1*14:126 total</b>                                    | <b>14:126 total</b> |           |                                               | <b>0</b> | <b>17</b> | <b>0</b> | <b>0</b> | <b>0</b> | <b>0</b> | <b>0</b> | <b>17</b> |                                                      | <b>I</b> |      |      |     |     |     | <b>WD</b> | <b>I</b>          |
| DRB1*14:126                                                 | 14:126              |           |                                               | 0        | 1         | 0        | 0        | 0        | 0        | 0        | 1         |                                                      |          |      |      |     |     |     |           |                   |
| DRB1*14:126:01                                              | 14:126:01           | HLA08086  |                                               | 0        | 16        | 0        | 0        | 0        | 0        | 0        | 16        |                                                      | <b>I</b> |      |      |     |     |     | WD        | <b>I</b>          |
| DRB1*14:128                                                 | 14:128              | HLA08553  |                                               | 0        | 0         | 3        | 0        | 0        | 0        | 0        | 3         |                                                      |          |      |      |     |     |     |           |                   |
| DRB1*14:129                                                 | 14:129              | HLA08565  |                                               | 0        | 0         | 3        | 0        | 0        | 0        | 0        | 3         |                                                      |          |      |      |     |     |     |           |                   |
| DRB1*14:133                                                 | 14:133              | HLA08860  |                                               | 1        | 3         | 2        | 0        | 0        | 0        | 0        | 6         |                                                      |          |      |      |     |     |     | WD        | WD                |
| DRB1*14:138                                                 | 14:138              | HLA09103  |                                               | 0        | 4         | 0        | 0        | 0        | 0        | 0        | 4         |                                                      |          |      |      |     |     |     |           |                   |
| DRB1*14:139                                                 | 14:139              | HLA09104  |                                               | 0        | 0         | 0        | 0        | 0        | 0        | 1        | 1         |                                                      |          |      |      |     |     |     |           |                   |
| DRB1*14:141                                                 | 14:141              | HLA09720  |                                               | 0        | 7         | 1        | 0        | 0        | 0        | 0        | 8         |                                                      | WD       |      |      |     |     |     | WD        | WD                |
| DRB1*14:142                                                 | 14:142              | HLA09762  |                                               | 0        | 1         | 0        | 0        | 0        | 0        | 0        | 1         |                                                      |          |      |      |     |     |     |           |                   |
| DRB1*14:145                                                 | 14:145              | HLA10310  |                                               | 0        | 1         | 0        | 0        | 0        | 0        | 0        | 1         |                                                      |          |      |      |     |     |     |           |                   |
| DRB1*14:151                                                 | 14:151              | HLA11689  |                                               | 0        | 0         | 1        | 0        | 0        | 0        | 0        | 1         |                                                      |          |      |      |     |     |     |           |                   |
| DRB1*14:152N                                                | 14:152N             | HLA11710  |                                               | 0        | 1         | 3        | 0        | 0        | 0        | 0        | 4         |                                                      |          |      |      |     |     |     |           |                   |
| DRB1*14:153                                                 | 14:153              | HLA11752  |                                               | 0        | 0         | 0        | 1        | 0        | 0        | 0        | 1         |                                                      |          |      |      |     |     |     |           |                   |
| DRB1*14:157                                                 | 14:157              | HLA11906  |                                               | 0        | 1         | 1        | 0        | 0        | 0        | 0        | 2         |                                                      |          |      |      |     |     |     |           |                   |
| DRB1*14:158                                                 | 14:158              | HLA12218  |                                               | 0        | 2         | 0        | 1        | 0        | 0        | 0        | 3         |                                                      |          |      |      |     |     |     |           |                   |
| DRB1*14:162                                                 | 14:162              | HLA13593  |                                               | 0        | 1         | 0        | 0        | 0        | 0        | 0        | 1         |                                                      |          |      |      |     |     |     |           |                   |

| Supplemental Table 11: HLA-DRB1 Allele Summary <sup>a</sup> |                        |           | Allele Count by Population Group <sup>b</sup> |             |               |                |              |              |             |               |                | 3.0.0 CIWD Category by Population Group <sup>c</sup> |          |          |          |          |          |          |          |                   |
|-------------------------------------------------------------|------------------------|-----------|-----------------------------------------------|-------------|---------------|----------------|--------------|--------------|-------------|---------------|----------------|------------------------------------------------------|----------|----------|----------|----------|----------|----------|----------|-------------------|
| Allele                                                      | Genomic Typing         | Allele ID | G group                                       | AFA         | API           | EURO           | MENA         | HIS          | NAM         | UNK           | Total          | AFA                                                  | API      | EURO     | MENA     | HIS      | NAM      | UNK      | Total    | Highest Frequency |
| DRB1*14:166N                                                | 14:166N                | HLA13973  |                                               | 0           | 0             | 1              | 0            | 0            | 0           | 2             | 3              |                                                      |          |          |          |          |          |          |          |                   |
| DRB1*14:169                                                 | 14:169                 | HLA14266  |                                               | 0           | 0             | 1              | 0            | 0            | 0           | 1             | 2              |                                                      |          |          |          |          |          |          |          |                   |
| DRB1*14:170                                                 | 14:170                 | HLA14361  |                                               | 0           | 0             | 0              | 0            | 1            | 0           | 0             | 1              |                                                      |          |          |          |          |          |          |          |                   |
| DRB1*14:171                                                 | 14:171                 | HLA14410  |                                               | 0           | 0             | 1              | 0            | 0            | 0           | 0             | 1              |                                                      |          |          |          |          |          |          |          |                   |
| DRB1*14:175                                                 | 14:175                 | HLA15077  |                                               | 0           | 3             | 0              | 0            | 0            | 0           | 0             | 3              |                                                      |          |          |          |          |          |          |          |                   |
| DRB1*14:178                                                 | 14:178                 | HLA15336  |                                               | 0           | 0             | 1              | 0            | 0            | 0           | 0             | 1              |                                                      |          |          |          |          |          |          |          |                   |
| DRB1*14:CODE                                                | 14:CODE                |           |                                               | 732         | 1003          | 18493          | 1030         | 1550         | 134         | 2392          | 25334          | NA                                                   | NA       | NA       | NA       | NA       | NA       | NA       | NA       | NA                |
| <b>DRB1*15:01 total</b>                                     | <b>15:01 total</b>     |           |                                               | <b>9821</b> | <b>129365</b> | <b>1507494</b> | <b>23939</b> | <b>41500</b> | <b>4043</b> | <b>123710</b> | <b>1839872</b> | <b>C</b>                                             | <b>C</b> | <b>C</b> | <b>C</b> | <b>C</b> | <b>C</b> | <b>C</b> | <b>C</b> | <b>C</b>          |
| DRB1*15:01                                                  | 15:01                  |           |                                               | 5095        | 15239         | 411297         | 5106         | 19404        | 2363        | 52072         | 510576         | C                                                    | C        | C        | C        | C        | C        | C        | C        | C                 |
| DRB1*15:01P                                                 | 15:01P                 |           |                                               | 0           | 0             | 172            | 0            | 0            | 0           | 0             | 172            |                                                      |          | I        |          |          |          |          | I        | I                 |
| <b>DRB1*15:01:01G total</b>                                 | <b>15:01:01G total</b> |           |                                               | <b>4725</b> | <b>114098</b> | <b>1095584</b> | <b>18823</b> | <b>22095</b> | <b>1680</b> | <b>71591</b>  | <b>1328596</b> | <b>C</b>                                             | <b>C</b> | <b>C</b> | <b>C</b> | <b>C</b> | <b>C</b> | <b>C</b> | <b>C</b> | <b>C</b>          |
| DRB1*15:01:01G                                              | 15:01:01G              |           | 15:01:01G                                     | 392         | 83418         | 42300          | 4218         | 5407         | 140         | 40393         | 176268         | C                                                    | C        | C        | C        | C        | C        | C        | C        | C                 |
| DRB1*15:01:01                                               | 15:01:01               |           | 15:01:01G                                     | 4207        | 30597         | 1046407        | 14586        | 15973        | 1469        | 30441         | 1143680        | C                                                    | C        | C        | C        | C        | C        | C        | C        | C                 |
| DRB1*15:01:01:01                                            | 15:01:01:01            | HLA00865  | 15:01:01G                                     | 49          | 26            | 3199           | 14           | 340          | 31          | 375           | 4034           | C                                                    | I        | C        | WD       | C        | C        | C        | C        | C                 |
| DRB1*15:01:01:02                                            | 15:01:01:02            | HLA03453  | 15:01:01G                                     | 76          | 48            | 3504           | 5            | 375          | 40          | 382           | 4430           | C                                                    | I        | C        | WD       | C        | C        | C        | C        | C                 |
| DRB1*15:01:01:03                                            | 15:01:01:03            | HLA07374  | 15:01:01G                                     | 0           | 0             | 131            | 0            | 0            | 0           | 0             | 131            |                                                      |          | I        |          |          |          |          | WD       | I                 |
| DRB1*15:01:17                                               | 15:01:17               | HLA06669  | 15:01:01G                                     | 1           | 9             | 4              | 0            | 0            | 0           | 0             | 14             |                                                      | WD       |          |          |          |          |          | WD       | WD                |
| DRB1*15:01:32                                               | 15:01:32               | HLA15611  | 15:01:01G                                     | 0           | 0             | 37             | 0            | 0            | 0           | 0             | 37             |                                                      |          | WD       |          |          |          |          | WD       | WD                |
| DRB1*15:145                                                 | 15:145                 | HLA16750  | 15:01:01G                                     | 0           | 0             | 2              | 0            | 0            | 0           | 0             | 2              |                                                      |          |          |          |          |          |          |          |                   |
| DRB1*15:01:02                                               | 15:01:02               | HLA00866  |                                               | 0           | 1             | 205            | 0            | 0            | 0           | 24            | 230            |                                                      |          | I        |          |          |          | I        | I        | I                 |
| DRB1*15:01:03                                               | 15:01:03               | HLA01468  |                                               | 0           | 0             | 25             | 0            | 1            | 0           | 3             | 29             |                                                      |          | WD       |          |          |          |          | WD       | WD                |
| DRB1*15:01:04                                               | 15:01:04               | HLA01582  |                                               | 0           | 4             | 41             | 0            | 0            | 0           | 5             | 50             |                                                      |          | WD       |          |          |          | WD       | WD       | WD                |
| DRB1*15:01:06                                               | 15:01:06               | HLA02569  |                                               | 0           | 3             | 2              | 0            | 0            | 0           | 0             | 5              |                                                      |          |          |          |          |          |          | WD       | WD                |
| DRB1*15:01:07                                               | 15:01:07               | HLA04033  |                                               | 0           | 14            | 0              | 0            | 0            | 0           | 1             | 15             |                                                      | I        |          |          |          |          |          | WD       | I                 |
| DRB1*15:01:08                                               | 15:01:08               | HLA04361  |                                               | 0           | 0             | 97             | 0            | 0            | 0           | 8             | 105            |                                                      |          | WD       |          |          |          | WD       | WD       | WD                |
| DRB1*15:01:10                                               | 15:01:10               | HLA04655  |                                               | 0           | 0             | 3              | 0            | 0            | 0           | 0             | 3              |                                                      |          |          |          |          |          |          |          |                   |
| DRB1*15:01:11                                               | 15:01:11               | HLA04656  |                                               | 0           | 0             | 6              | 0            | 0            | 0           | 1             | 7              |                                                      |          | WD       |          |          |          |          | WD       | WD                |
| DRB1*15:01:12                                               | 15:01:12               | HLA04657  |                                               | 1           | 0             | 17             | 0            | 0            | 0           | 4             | 22             |                                                      |          | WD       |          |          |          |          | WD       | WD                |
| DRB1*15:01:13                                               | 15:01:13               | HLA06473  |                                               | 0           | 1             | 9              | 0            | 0            | 0           | 0             | 10             |                                                      |          | WD       |          |          |          |          | WD       | WD                |
| DRB1*15:01:14                                               | 15:01:14               | HLA06476  |                                               | 0           | 0             | 2              | 0            | 0            | 0           | 0             | 2              |                                                      |          |          |          |          |          |          |          |                   |
| DRB1*15:01:15                                               | 15:01:15               | HLA06487  |                                               | 0           | 0             | 2              | 0            | 0            | 0           | 0             | 2              |                                                      |          |          |          |          |          |          |          |                   |

| Supplemental Table 11: HLA-DRB1 Allele Summary <sup>a</sup> |                        |           | Allele Count by Population Group <sup>b</sup> |              |               |              |              |             |             |              |               | 3.0.0 CIWD Category by Population Group <sup>c</sup> |          |          |          |          |          |          |          |                   |
|-------------------------------------------------------------|------------------------|-----------|-----------------------------------------------|--------------|---------------|--------------|--------------|-------------|-------------|--------------|---------------|------------------------------------------------------|----------|----------|----------|----------|----------|----------|----------|-------------------|
| Allele                                                      | Genomic Typing         | Allele ID | G group                                       | AFA          | API           | EURO         | MENA         | HIS         | NAM         | UNK          | Total         | AFA                                                  | API      | EURO     | MENA     | HIS      | NAM      | UNK      | Total    | Highest Frequency |
| DRB1*15:01:16                                               | 15:01:16               | HLA06668  |                                               | 0            | 0             | 0            | 10           | 0           | 0           | 1            | 11            |                                                      |          |          | WD       |          |          |          | WD       | WD                |
| DRB1*15:01:18                                               | 15:01:18               | HLA07505  |                                               | 0            | 0             | 1            | 0            | 0           | 0           | 0            | 1             |                                                      |          |          |          |          |          |          |          |                   |
| DRB1*15:01:20                                               | 15:01:20               | HLA08229  |                                               | 0            | 0             | 8            | 0            | 0           | 0           | 0            | 8             |                                                      |          | WD       |          |          |          |          | WD       | WD                |
| DRB1*15:01:22                                               | 15:01:22               | HLA10301  |                                               | 0            | 2             | 0            | 0            | 0           | 0           | 0            | 2             |                                                      |          |          |          |          |          |          |          |                   |
| DRB1*15:01:25                                               | 15:01:25               | HLA12364  |                                               | 0            | 0             | 23           | 0            | 0           | 0           | 0            | 23            |                                                      |          | WD       |          |          |          |          | WD       | WD                |
| DRB1*15:01:27                                               | 15:01:27               | HLA13814  |                                               | 0            | 2             | 0            | 0            | 0           | 0           | 0            | 2             |                                                      |          |          |          |          |          |          |          |                   |
| DRB1*15:01:31                                               | 15:01:31               | HLA15693  |                                               | 0            | 1             | 0            | 0            | 0           | 0           | 0            | 1             |                                                      |          |          |          |          |          |          |          |                   |
| <b>DRB1*15:02 total</b>                                     | <b>15:02 total</b>     |           |                                               | <b>1142</b>  | <b>135036</b> | <b>99345</b> | <b>13856</b> | <b>7830</b> | <b>810</b>  | <b>26660</b> | <b>284679</b> | <b>C</b>                                             | <b>C</b> | <b>C</b> | <b>C</b> | <b>C</b> | <b>C</b> | <b>C</b> | <b>C</b> | <b>C</b>          |
| DRB1*15:02                                                  | 15:02                  |           |                                               | 102          | 3704          | 5688         | 518          | 1172        | 56          | 1911         | 13151         | C                                                    | C        | C        | C        | C        | C        | C        | C        | C                 |
| DRB1*15:02P                                                 | 15:02P                 |           |                                               | 0            | 0             | 78           | 1            | 0           | 0           | 1            | 80            |                                                      |          | WD       |          |          |          |          | WD       | WD                |
| <b>DRB1*15:02:01G total</b>                                 | <b>15:02:01G total</b> |           |                                               | <b>1007</b>  | <b>111474</b> | <b>92906</b> | <b>12930</b> | <b>6631</b> | <b>717</b>  | <b>24312</b> | <b>249977</b> | <b>C</b>                                             | <b>C</b> | <b>C</b> | <b>C</b> | <b>C</b> | <b>C</b> | <b>C</b> | <b>C</b> | <b>C</b>          |
| DRB1*15:02:01G                                              | 15:02:01G              |           | 15:02:01G                                     | 117          | 67890         | 21326        | 1807         | 952         | 27          | 3583         | 95702         | C                                                    | C        | C        | C        | C        | C        | C        | C        | C                 |
| DRB1*15:02:01                                               | 15:02:01               |           | 15:02:01G                                     | 888          | 43456         | 71451        | 11114        | 5642        | 688         | 20691        | 153930        | C                                                    | C        | C        | C        | C        | C        | C        | C        | C                 |
| DRB1*15:02:01:01                                            | 15:02:01:01            | HLA00867  | 15:02:01G                                     | 2            | 109           | 115          | 8            | 36          | 2           | 35           | 307           |                                                      | I        | WD       | WD       | I        |          | I        | I        | I                 |
| DRB1*15:02:01:02                                            | 15:02:01:02            | HLA14828  | 15:02:01G                                     | 0            | 0             | 7            | 0            | 0           | 0           | 0            | 7             |                                                      |          | WD       |          |          |          |          | WD       | WD                |
| DRB1*15:140                                                 | 15:140                 | HLA16027  | 15:02:01G                                     | 0            | 19            | 7            | 1            | 1           | 0           | 3            | 31            |                                                      | I        | WD       |          |          |          |          | WD       | I                 |
| DRB1*15:02:02                                               | 15:02:02               | HLA00868  |                                               | 32           | 19269         | 666          | 399          | 27          | 36          | 422          | 20851         | WD                                                   | C        | I        | C        | I        | C        | C        | C        | C                 |
| DRB1*15:02:04                                               | 15:02:04               | HLA02721  |                                               | 0            | 32            | 0            | 0            | 0           | 0           | 2            | 34            |                                                      | I        |          |          |          |          |          | WD       | I                 |
| DRB1*15:02:05                                               | 15:02:05               | HLA03254  |                                               | 1            | 551           | 7            | 8            | 0           | 1           | 12           | 580           |                                                      | C        | WD       | WD       |          |          | WD       | I        | C                 |
| DRB1*15:02:08                                               | 15:02:08               | HLA05129  |                                               | 0            | 3             | 0            | 0            | 0           | 0           | 0            | 3             |                                                      |          |          |          |          |          |          |          |                   |
| DRB1*15:02:10                                               | 15:02:10               | HLA09107  |                                               | 0            | 1             | 0            | 0            | 0           | 0           | 0            | 1             |                                                      |          |          |          |          |          |          |          |                   |
| DRB1*15:02:14                                               | 15:02:14               | HLA13815  |                                               | 0            | 1             | 0            | 0            | 0           | 0           | 0            | 1             |                                                      |          |          |          |          |          |          |          |                   |
| DRB1*15:02:15                                               | 15:02:15               | HLA13889  |                                               | 0            | 1             | 0            | 0            | 0           | 0           | 0            | 1             |                                                      |          |          |          |          |          |          |          |                   |
| <b>DRB1*15:03 total</b>                                     | <b>15:03 total</b>     |           |                                               | <b>44994</b> | <b>321</b>    | <b>4318</b>  | <b>1893</b>  | <b>6705</b> | <b>1272</b> | <b>10576</b> | <b>70079</b>  | <b>C</b>                                             | <b>C</b> | <b>C</b> | <b>C</b> | <b>C</b> | <b>C</b> | <b>C</b> | <b>C</b> | <b>C</b>          |
| DRB1*15:03                                                  | 15:03                  |           |                                               | 5514         | 22            | 328          | 62           | 1124        | 133         | 1092         | 8275          | C                                                    | I        | I        | C        | C        | C        | C        | C        | C                 |
| DRB1*15:03P                                                 | 15:03P                 |           |                                               | 1            | 0             | 0            | 0            | 0           | 0           | 0            | 1             |                                                      |          |          |          |          |          |          |          |                   |
| <b>DRB1*15:03:01G total</b>                                 | <b>15:03:01G total</b> |           |                                               | <b>39476</b> | <b>299</b>    | <b>3990</b>  | <b>1831</b>  | <b>5581</b> | <b>1138</b> | <b>9484</b>  | <b>61799</b>  | <b>C</b>                                             | <b>C</b> | <b>C</b> | <b>C</b> | <b>C</b> | <b>C</b> | <b>C</b> | <b>C</b> | <b>C</b>          |
| DRB1*15:03:01G                                              | 15:03:01G              |           | 15:03:01G                                     | 8861         | 174           | 2522         | 1634         | 1205        | 67          | 2975         | 17438         | C                                                    | C        | C        | C        | C        | C        | C        | C        | C                 |
| DRB1*15:03:01                                               | 15:03:01               |           | 15:03:01G                                     | 29462        | 121           | 1425         | 195          | 4170        | 1029        | 6276         | 42678         | C                                                    | I        | C        | C        | C        | C        | C        | C        | C                 |
| DRB1*15:03:01:01                                            | 15:03:01:01            | HLA00870  | 15:03:01G                                     | 537          | 3             | 26           | 0            | 106         | 19          | 117          | 808           | C                                                    |          | WD       |          | C        | C        | I        | I        | C                 |
| DRB1*15:03:01:02                                            | 15:03:01:02            | HLA03454  | 15:03:01G                                     | 616          | 1             | 17           | 2            | 100         | 23          | 116          | 875           | C                                                    |          | WD       |          | C        | C        | I        | I        | C                 |

| Supplemental Table 11: HLA-DRB1 Allele Summary <sup>a</sup> |                    |           | Allele Count by Population Group <sup>b</sup> |           |              |            |            |           |           |            |              | 3.0.0 CIWD Category by Population Group <sup>c</sup> |           |           |           |          |          |           |           |                   |
|-------------------------------------------------------------|--------------------|-----------|-----------------------------------------------|-----------|--------------|------------|------------|-----------|-----------|------------|--------------|------------------------------------------------------|-----------|-----------|-----------|----------|----------|-----------|-----------|-------------------|
| Allele                                                      | Genomic Typing     | Allele ID | G group                                       | AFA       | API          | EURO       | MENA       | HIS       | NAM       | UNK        | Total        | AFA                                                  | API       | EURO      | MENA      | HIS      | NAM      | UNK       | Total     | Highest Frequency |
| DRB1*15:03:02                                               | 15:03:02           | HLA06472  |                                               | 3         | 0            | 0          | 0          | 0         | 1         | 0          | 4            |                                                      |           |           |           |          |          |           |           |                   |
| DRB1*15:04                                                  | 15:04              | HLA00871  |                                               | 7         | 2354         | 432        | 23         | 20        | 8         | 91         | 2935         | WD                                                   | C         | I         | WD        | I        | C        | I         | C         | C                 |
| DRB1*15:05                                                  | 15:05              | HLA00872  |                                               | 0         | 4            | 15         | 0          | 1         | 2         | 2          | 24           |                                                      |           | WD        |           |          |          |           | WD        | WD                |
| <b>DRB1*15:06 total</b>                                     | <b>15:06 total</b> |           |                                               | <b>17</b> | <b>12710</b> | <b>304</b> | <b>404</b> | <b>35</b> | <b>28</b> | <b>292</b> | <b>13790</b> | <b>WD</b>                                            | <b>C</b>  | <b>I</b>  | <b>C</b>  | <b>I</b> | <b>C</b> | <b>C</b>  | <b>C</b>  | <b>C</b>          |
| DRB1*15:06                                                  | 15:06              |           |                                               | 0         | 1290         | 40         | 43         | 6         | 4         | 28         | 1411         |                                                      | C         | WD        | C         | WD       |          | I         | I         | C                 |
| DRB1*15:06:01                                               | 15:06:01           | HLA00873  |                                               | 17        | 11409        | 262        | 360        | 29        | 24        | 263        | 12364        | WD                                                   | C         | I         | C         | I        | C        | C         | C         | C                 |
| DRB1*15:06:02                                               | 15:06:02           | HLA07864  |                                               | 0         | 11           | 2          | 1          | 0         | 0         | 1          | 15           |                                                      | WD        |           |           |          |          |           | WD        | WD                |
| <b>DRB1*15:07 total</b>                                     | <b>15:07 total</b> |           |                                               | <b>5</b>  | <b>7</b>     | <b>150</b> | <b>12</b>  | <b>3</b>  | <b>0</b>  | <b>12</b>  | <b>189</b>   | <b>WD</b>                                            | <b>WD</b> | <b>I</b>  | <b>WD</b> |          |          | <b>WD</b> | <b>I</b>  | <b>I</b>          |
| DRB1*15:07                                                  | 15:07              |           |                                               | 3         | 0            | 18         | 3          | 1         | 0         | 0          | 25           |                                                      |           | WD        |           |          |          |           | WD        | WD                |
| DRB1*15:07:01                                               | 15:07:01           | HLA00874  |                                               | 2         | 7            | 131        | 9          | 2         | 0         | 12         | 163          |                                                      | WD        | I         | WD        |          |          |           | WD        | I                 |
| DRB1*15:07:02                                               | 15:07:02           | HLA08230  |                                               | 0         | 0            | 1          | 0          | 0         | 0         | 0          | 1            |                                                      |           |           |           |          |          |           |           |                   |
| DRB1*15:09                                                  | 15:09              | HLA01159  |                                               | 1         | 0            | 2          | 0          | 1         | 0         | 0          | 4            |                                                      |           |           |           |          |          |           |           |                   |
| DRB1*15:10                                                  | 15:10              | HLA01211  |                                               | 0         | 0            | 16         | 0          | 1         | 0         | 2          | 19           |                                                      |           | WD        |           |          |          |           | WD        | WD                |
| DRB1*15:11                                                  | 15:11              | HLA01340  |                                               | 1         | 15           | 27         | 10         | 4         | 0         | 8          | 65           |                                                      | I         | WD        | WD        |          |          |           | WD        | WD                |
| DRB1*15:12                                                  | 15:12              | HLA01502  |                                               | 0         | 0            | 3          | 0          | 0         | 0         | 0          | 3            |                                                      |           |           |           |          |          |           |           |                   |
| DRB1*15:13                                                  | 15:13              | HLA01541  |                                               | 0         | 0            | 29         | 0          | 0         | 0         | 0          | 29           |                                                      |           | WD        |           |          |          |           | WD        | WD                |
| DRB1*15:14                                                  | 15:14              | HLA01842  |                                               | 0         | 99           | 7          | 0          | 2         | 0         | 24         | 132          |                                                      | I         | WD        |           |          |          | I         | WD        | I                 |
| <b>DRB1*15:15 total</b>                                     | <b>15:15 total</b> |           |                                               | <b>0</b>  | <b>5</b>     | <b>5</b>   | <b>0</b>   | <b>0</b>  | <b>0</b>  | <b>0</b>   | <b>10</b>    |                                                      | <b>WD</b> | <b>WD</b> |           |          |          |           | <b>WD</b> | <b>WD</b>         |
| DRB1*15:15                                                  | 15:15              |           |                                               | 0         | 3            | 4          | 0          | 0         | 0         | 0          | 7            |                                                      |           |           |           |          |          |           | WD        | WD                |
| DRB1*15:15:01                                               | 15:15:01           | HLA01936  |                                               | 0         | 2            | 1          | 0          | 0         | 0         | 0          | 3            |                                                      |           |           |           |          |          |           |           |                   |
| DRB1*15:18                                                  | 15:18              | HLA02326  |                                               | 1         | 0            | 156        | 1          | 2         | 0         | 3          | 163          |                                                      |           | I         |           |          |          |           | I         | I                 |
| DRB1*15:20                                                  | 15:20              | HLA02571  |                                               | 1         | 62           | 16         | 0          | 1         | 1         | 2          | 83           |                                                      | I         | WD        |           |          |          |           | WD        | I                 |
| DRB1*15:22                                                  | 15:22              | HLA02575  |                                               | 7         | 0            | 41         | 0          | 1         | 0         | 6          | 55           | WD                                                   |           | WD        |           |          |          |           | WD        | WD                |
| DRB1*15:23                                                  | 15:23              | HLA03033  |                                               | 18        | 0            | 1          | 0          | 1         | 0         | 4          | 24           | WD                                                   |           |           |           |          |          |           | WD        | WD                |
| DRB1*15:24                                                  | 15:24              | HLA03035  |                                               | 0         | 0            | 53         | 0          | 2         | 0         | 44         | 99           |                                                      |           | WD        |           |          |          | I         | WD        | I                 |
| DRB1*15:25                                                  | 15:25              | HLA03053  |                                               | 0         | 0            | 1          | 0          | 0         | 0         | 0          | 1            |                                                      |           |           |           |          |          |           |           |                   |
| DRB1*15:27                                                  | 15:27              | HLA03143  |                                               | 0         | 0            | 2          | 2          | 0         | 0         | 0          | 4            |                                                      |           |           |           |          |          |           |           |                   |
| DRB1*15:28                                                  | 15:28              | HLA03381  |                                               | 0         | 0            | 0          | 0          | 0         | 0         | 2          | 2            |                                                      |           |           |           |          |          |           |           |                   |
| DRB1*15:31                                                  | 15:31              | HLA03386  |                                               | 0         | 6            | 0          | 0          | 0         | 0         | 1          | 7            |                                                      | WD        |           |           |          |          |           | WD        | WD                |
| DRB1*15:32                                                  | 15:32              | HLA03635  |                                               | 0         | 0            | 0          | 0          | 1         | 0         | 0          | 1            |                                                      |           |           |           |          |          |           |           |                   |
| DRB1*15:33                                                  | 15:33              | HLA03766  |                                               | 0         | 0            | 27         | 0          | 0         | 0         | 0          | 27           |                                                      |           | WD        |           |          |          |           | WD        | WD                |

| Supplemental Table 11: HLA-DRB1 Allele Summary <sup>a</sup> |                    |           | Allele Count by Population Group <sup>b</sup> |          |          |           |          |          |          |          |           | 3.0.0 CIWD Category by Population Group <sup>c</sup> |     |           |      |     |     |     |           |                   |
|-------------------------------------------------------------|--------------------|-----------|-----------------------------------------------|----------|----------|-----------|----------|----------|----------|----------|-----------|------------------------------------------------------|-----|-----------|------|-----|-----|-----|-----------|-------------------|
| Allele                                                      | Genomic Typing     | Allele ID | G group                                       | AFA      | API      | EURO      | MENA     | HIS      | NAM      | UNK      | Total     | AFA                                                  | API | EURO      | MENA | HIS | NAM | UNK | Total     | Highest Frequency |
| DRB1*15:35                                                  | 15:35              | HLA04362  |                                               | 0        | 1        | 3         | 0        | 0        | 0        | 0        | 4         |                                                      |     |           |      |     |     |     |           |                   |
| DRB1*15:36                                                  | 15:36              | HLA04363  |                                               | 0        | 0        | 10        | 0        | 0        | 0        | 0        | 10        |                                                      |     | WD        |      |     |     |     | WD        | WD                |
| <b>DRB1*15:37 total</b>                                     | <b>15:37 total</b> |           |                                               | <b>0</b> | <b>0</b> | <b>26</b> | <b>1</b> | <b>0</b> | <b>0</b> | <b>0</b> | <b>27</b> |                                                      |     | <b>WD</b> |      |     |     |     | <b>WD</b> | <b>WD</b>         |
| DRB1*15:37                                                  | 15:37              |           |                                               | 0        | 0        | 4         | 0        | 0        | 0        | 0        | 4         |                                                      |     |           |      |     |     |     |           |                   |
| DRB1*15:37:01                                               | 15:37:01           | HLA04364  |                                               | 0        | 0        | 17        | 0        | 0        | 0        | 0        | 17        |                                                      |     | WD        |      |     |     |     | WD        | WD                |
| DRB1*15:37:02                                               | 15:37:02           | HLA08593  |                                               | 0        | 0        | 5         | 1        | 0        | 0        | 0        | 6         |                                                      |     | WD        |      |     |     |     | WD        | WD                |
| DRB1*15:38                                                  | 15:38              | HLA04365  |                                               | 0        | 75       | 0         | 0        | 0        | 0        | 0        | 75        |                                                      | I   |           |      |     |     |     | WD        | I                 |
| DRB1*15:39                                                  | 15:39              | HLA04366  |                                               | 0        | 0        | 0         | 0        | 0        | 0        | 1        | 1         |                                                      |     |           |      |     |     |     |           |                   |
| DRB1*15:40                                                  | 15:40              | HLA04368  |                                               | 0        | 0        | 58        | 0        | 0        | 0        | 1        | 59        |                                                      |     | WD        |      |     |     |     | WD        | WD                |
| DRB1*15:41                                                  | 15:41              | HLA04369  |                                               | 0        | 0        | 1         | 0        | 0        | 0        | 0        | 1         |                                                      |     |           |      |     |     |     |           |                   |
| DRB1*15:43                                                  | 15:43              | HLA04671  |                                               | 0        | 1        | 2         | 0        | 0        | 0        | 1        | 4         |                                                      |     |           |      |     |     |     |           |                   |
| DRB1*15:47                                                  | 15:47              | HLA05387  |                                               | 0        | 8        | 0         | 0        | 0        | 0        | 0        | 8         |                                                      | WD  |           |      |     |     |     | WD        | WD                |
| DRB1*15:49                                                  | 15:49              | HLA05392  |                                               | 0        | 1        | 0         | 0        | 0        | 0        | 0        | 1         |                                                      |     |           |      |     |     |     |           |                   |
| DRB1*15:53                                                  | 15:53              | HLA06471  |                                               | 0        | 1        | 0         | 0        | 0        | 0        | 0        | 1         |                                                      |     |           |      |     |     |     |           |                   |
| DRB1*15:54                                                  | 15:54              | HLA06474  |                                               | 0        | 0        | 1         | 0        | 0        | 0        | 0        | 1         |                                                      |     |           |      |     |     |     |           |                   |
| DRB1*15:55                                                  | 15:55              | HLA06475  |                                               | 0        | 0        | 8         | 0        | 0        | 0        | 1        | 9         |                                                      |     | WD        |      |     |     |     | WD        | WD                |
| DRB1*15:56                                                  | 15:56              | HLA06486  |                                               | 0        | 0        | 0         | 5        | 0        | 0        | 20       | 25        |                                                      |     |           | WD   |     |     | I   | WD        | I                 |
| DRB1*15:57                                                  | 15:57              | HLA06504  |                                               | 5        | 0        | 0         | 0        | 0        | 0        | 1        | 6         | WD                                                   |     |           |      |     |     |     | WD        | WD                |
| DRB1*15:59                                                  | 15:59              | HLA07143  |                                               | 0        | 0        | 1         | 0        | 0        | 0        | 0        | 1         |                                                      |     |           |      |     |     |     |           |                   |
| DRB1*15:60                                                  | 15:60              | HLA07144  |                                               | 0        | 0        | 1         | 0        | 0        | 0        | 0        | 1         |                                                      |     |           |      |     |     |     |           |                   |
| DRB1*15:61                                                  | 15:61              | HLA07153  |                                               | 0        | 1        | 4         | 0        | 0        | 0        | 0        | 5         |                                                      |     |           |      |     |     |     | WD        | WD                |
| DRB1*15:62                                                  | 15:62              | HLA07164  |                                               | 0        | 0        | 1         | 0        | 0        | 0        | 0        | 1         |                                                      |     |           |      |     |     |     |           |                   |
| DRB1*15:64                                                  | 15:64              | HLA07248  |                                               | 0        | 0        | 4         | 0        | 0        | 0        | 0        | 4         |                                                      |     |           |      |     |     |     |           |                   |
| DRB1*15:65                                                  | 15:65              | HLA07249  |                                               | 0        | 1        | 5         | 0        | 0        | 0        | 0        | 6         |                                                      |     | WD        |      |     |     |     | WD        | WD                |
| <b>DRB1*15:66 total</b>                                     | <b>15:66 total</b> |           |                                               | <b>0</b> | <b>0</b> | <b>1</b>  | <b>0</b> | <b>0</b> | <b>0</b> | <b>0</b> | <b>1</b>  |                                                      |     |           |      |     |     |     |           |                   |
| DRB1*15:66:01                                               | 15:66:01           | HLA07275  |                                               | 0        | 0        | 1         | 0        | 0        | 0        | 0        | 1         |                                                      |     |           |      |     |     |     |           |                   |
| DRB1*15:67                                                  | 15:67              | HLA07337  |                                               | 0        | 0        | 21        | 0        | 0        | 0        | 1        | 22        |                                                      |     | WD        |      |     |     |     | WD        | WD                |
| DRB1*15:68                                                  | 15:68              | HLA07361  |                                               | 0        | 39       | 0         | 0        | 0        | 0        | 0        | 39        |                                                      | I   |           |      |     |     |     | WD        | I                 |
| DRB1*15:71                                                  | 15:71              | HLA07504  |                                               | 0        | 2        | 1         | 0        | 0        | 0        | 0        | 3         |                                                      |     |           |      |     |     |     |           |                   |
| DRB1*15:73                                                  | 15:73              | HLA07865  |                                               | 0        | 3        | 0         | 0        | 0        | 0        | 0        | 3         |                                                      |     |           |      |     |     |     |           |                   |
| DRB1*15:74                                                  | 15:74              | HLA07866  |                                               | 0        | 0        | 4         | 0        | 0        | 0        | 0        | 4         |                                                      |     |           |      |     |     |     |           |                   |

| Supplemental Table 11: HLA-DRB1 Allele Summary <sup>a</sup> |                     |           | Allele Count by Population Group <sup>b</sup> |            |             |               |              |             |            |              |               | 3.0.0 CIWD Category by Population Group <sup>c</sup> |          |          |          |          |          |          |          |                   |
|-------------------------------------------------------------|---------------------|-----------|-----------------------------------------------|------------|-------------|---------------|--------------|-------------|------------|--------------|---------------|------------------------------------------------------|----------|----------|----------|----------|----------|----------|----------|-------------------|
| Allele                                                      | Genomic Typing      | Allele ID | G group                                       | AFA        | API         | EURO          | MENA         | HIS         | NAM        | UNK          | Total         | AFA                                                  | API      | EURO     | MENA     | HIS      | NAM      | UNK      | Total    | Highest Frequency |
| DRB1*15:75                                                  | 15:75               | HLA07867  |                                               | 0          | 0           | 2             | 0            | 0           | 0          | 0            | 2             |                                                      |          |          |          |          |          |          |          |                   |
| DRB1*15:76                                                  | 15:76               | HLA08090  |                                               | 0          | 0           | 1             | 0            | 0           | 0          | 1            | 2             |                                                      |          |          |          |          |          |          |          |                   |
| DRB1*15:77                                                  | 15:77               | HLA08228  |                                               | 0          | 1           | 0             | 0            | 0           | 0          | 0            | 1             |                                                      |          |          |          |          |          |          |          |                   |
| DRB1*15:78                                                  | 15:78               | HLA08546  |                                               | 1          | 0           | 0             | 0            | 0           | 0          | 0            | 1             |                                                      |          |          |          |          |          |          |          |                   |
| DRB1*15:80N                                                 | 15:80N              | HLA08583  |                                               | 0          | 1           | 0             | 0            | 0           | 0          | 0            | 1             |                                                      |          |          |          |          |          |          |          |                   |
| DRB1*15:85                                                  | 15:85               | HLA08837  |                                               | 0          | 0           | 3             | 0            | 0           | 0          | 0            | 3             |                                                      |          |          |          |          |          |          |          |                   |
| DRB1*15:86                                                  | 15:86               | HLA08838  |                                               | 0          | 0           | 2             | 0            | 0           | 0          | 0            | 2             |                                                      |          |          |          |          |          |          |          |                   |
| DRB1*15:88                                                  | 15:88               | HLA08913  |                                               | 0          | 0           | 4             | 0            | 0           | 0          | 0            | 4             |                                                      |          |          |          |          |          |          |          |                   |
| DRB1*15:92                                                  | 15:92               | HLA09054  |                                               | 0          | 0           | 3             | 0            | 1           | 0          | 0            | 4             |                                                      |          |          |          |          |          |          |          |                   |
| DRB1*15:93                                                  | 15:93               | HLA09208  |                                               | 0          | 0           | 11            | 0            | 0           | 0          | 0            | 11            |                                                      |          | WD       |          |          |          |          | WD       | WD                |
| DRB1*15:94                                                  | 15:94               | HLA09319  |                                               | 1          | 0           | 1             | 0            | 1           | 0          | 1            | 4             |                                                      |          |          |          |          |          |          |          |                   |
| DRB1*15:96                                                  | 15:96               | HLA09676  |                                               | 0          | 1           | 12            | 1            | 1           | 0          | 0            | 15            |                                                      |          | WD       |          |          |          |          | WD       | WD                |
| DRB1*15:102                                                 | 15:102              | HLA10303  |                                               | 0          | 3           | 0             | 0            | 0           | 0          | 0            | 3             |                                                      |          |          |          |          |          |          |          |                   |
| <b>DRB1*15:104 total</b>                                    | <b>15:104 total</b> |           |                                               | <b>0</b>   | <b>1</b>    | <b>1</b>      | <b>0</b>     | <b>0</b>    | <b>0</b>   | <b>0</b>     | <b>2</b>      |                                                      |          |          |          |          |          |          |          |                   |
| DRB1*15:104                                                 | 15:104              |           |                                               | 0          | 1           | 1             | 0            | 0           | 0          | 0            | 2             |                                                      |          |          |          |          |          |          |          |                   |
| DRB1*15:107                                                 | 15:107              | HLA11369  |                                               | 0          | 0           | 1             | 0            | 0           | 0          | 0            | 1             |                                                      |          |          |          |          |          |          |          |                   |
| DRB1*15:109                                                 | 15:109              | HLA11603  |                                               | 0          | 1           | 0             | 0            | 0           | 0          | 0            | 1             |                                                      |          |          |          |          |          |          |          |                   |
| DRB1*15:115N                                                | 15:115N             | HLA12576  |                                               | 0          | 0           | 1             | 0            | 0           | 0          | 0            | 1             |                                                      |          |          |          |          |          |          |          |                   |
| DRB1*15:118                                                 | 15:118              | HLA13153  |                                               | 0          | 0           | 0             | 1            | 0           | 0          | 0            | 1             |                                                      |          |          |          |          |          |          |          |                   |
| DRB1*15:123                                                 | 15:123              | HLA13374  |                                               | 0          | 1           | 0             | 0            | 0           | 0          | 0            | 1             |                                                      |          |          |          |          |          |          |          |                   |
| DRB1*15:126                                                 | 15:126              | HLA13888  |                                               | 0          | 1           | 0             | 0            | 0           | 0          | 0            | 1             |                                                      |          |          |          |          |          |          |          |                   |
| DRB1*15:129N                                                | 15:129N             | HLA14224  |                                               | 0          | 1           | 0             | 0            | 0           | 0          | 0            | 1             |                                                      |          |          |          |          |          |          |          |                   |
| DRB1*15:131                                                 | 15:131              | HLA14562  |                                               | 0          | 0           | 1             | 0            | 0           | 0          | 0            | 1             |                                                      |          |          |          |          |          |          |          |                   |
| DRB1*15:132                                                 | 15:132              | HLA15071  |                                               | 0          | 1           | 0             | 0            | 0           | 0          | 0            | 1             |                                                      |          |          |          |          |          |          |          |                   |
| DRB1*15:136                                                 | 15:136              | HLA14951  |                                               | 0          | 0           | 2             | 0            | 0           | 0          | 0            | 2             |                                                      |          |          |          |          |          |          |          |                   |
| DRB1*15:137N                                                | 15:137N             | HLA14952  |                                               | 1          | 0           | 0             | 0            | 0           | 0          | 0            | 1             |                                                      |          |          |          |          |          |          |          |                   |
| DRB1*15:CODE                                                | 15:CODE             |           |                                               | 1292       | 1676        | 27213         | 649          | 2854        | 163        | 2958         | 36805         | NA                                                   | NA       | NA       | NA       | NA       | NA       | NA       | NA       | NA                |
| <b>DRB1*16:01 total</b>                                     | <b>16:01 total</b>  |           |                                               | <b>939</b> | <b>1501</b> | <b>327466</b> | <b>13810</b> | <b>7002</b> | <b>585</b> | <b>17631</b> | <b>368934</b> | <b>C</b>                                             | <b>C</b> | <b>C</b> | <b>C</b> | <b>C</b> | <b>C</b> | <b>C</b> | <b>C</b> | <b>C</b>          |
| DRB1*16:01                                                  | 16:01               |           |                                               | 100        | 51          | 14990         | 654          | 1277        | 55         | 1224         | 18351         | C                                                    | I        | C        | C        | C        | C        | C        | C        | C                 |
| DRB1*16:01P                                                 | 16:01P              |           |                                               | 0          | 0           | 160           | 0            | 2           | 0          | 0            | 162           |                                                      |          | I        |          |          |          |          | I        | I                 |
| DRB1*16:01:01                                               | 16:01:01            | HLA00876  |                                               | 839        | 1450        | 312275        | 13152        | 5723        | 530        | 16402        | 350371        | C                                                    | C        | C        | C        | C        | C        | C        | C        | C                 |

| Supplemental Table 11: HLA-DRB1 Allele Summary <sup>a</sup> |                        |           | Allele Count by Population Group <sup>b</sup> |             |              |              |             |              |             |             |              | 3.0.0 CIWD Category by Population Group <sup>c</sup> |          |           |           |          |          |           |           |                   |
|-------------------------------------------------------------|------------------------|-----------|-----------------------------------------------|-------------|--------------|--------------|-------------|--------------|-------------|-------------|--------------|------------------------------------------------------|----------|-----------|-----------|----------|----------|-----------|-----------|-------------------|
| Allele                                                      | Genomic Typing         | Allele ID | G group                                       | AFA         | API          | EURO         | MENA        | HIS          | NAM         | UNK         | Total        | AFA                                                  | API      | EURO      | MENA      | HIS      | NAM      | UNK       | Total     | Highest Frequency |
| DRB1*16:01:02                                               | 16:01:02               | HLA00877  |                                               | 0           | 0            | 12           | 2           | 0            | 0           | 3           | 17           |                                                      |          | WD        |           |          |          |           | WD        | WD                |
| DRB1*16:01:04                                               | 16:01:04               | HLA09677  |                                               | 0           | 0            | 0            | 1           | 0            | 0           | 0           | 1            |                                                      |          |           |           |          |          |           |           |                   |
| DRB1*16:01:05                                               | 16:01:05               | HLA09678  |                                               | 0           | 0            | 2            | 0           | 0            | 0           | 0           | 2            |                                                      |          |           |           |          |          |           |           |                   |
| DRB1*16:01:06                                               | 16:01:06               | HLA12398  |                                               | 0           | 0            | 0            | 1           | 0            | 0           | 0           | 1            |                                                      |          |           |           |          |          |           |           |                   |
| DRB1*16:01:08                                               | 16:01:08               | HLA13156  |                                               | 0           | 0            | 18           | 0           | 0            | 0           | 2           | 20           |                                                      |          | WD        |           |          |          |           | WD        | WD                |
| DRB1*16:01:10                                               | 16:01:10               | HLA14174  |                                               | 0           | 0            | 7            | 0           | 0            | 0           | 0           | 7            |                                                      |          | WD        |           |          |          |           | WD        | WD                |
| DRB1*16:01:12                                               | 16:01:12               | HLA16570  |                                               | 0           | 0            | 2            | 0           | 0            | 0           | 0           | 2            |                                                      |          |           |           |          |          |           |           |                   |
| <b>DRB1*16:02 total</b>                                     | <b>16:02 total</b>     |           |                                               | <b>5369</b> | <b>15430</b> | <b>24244</b> | <b>3882</b> | <b>14948</b> | <b>1361</b> | <b>8541</b> | <b>73775</b> | <b>C</b>                                             | <b>C</b> | <b>C</b>  | <b>C</b>  | <b>C</b> | <b>C</b> | <b>C</b>  | <b>C</b>  | <b>C</b>          |
| DRB1*16:02                                                  | 16:02                  |           |                                               | 543         | 681          | 1948         | 170         | 2055         | 132         | 900         | 6429         | C                                                    | C        | C         | C         | C        | C        | C         | C         | C                 |
| DRB1*16:02P                                                 | 16:02P                 |           |                                               | 0           | 0            | 14           | 0           | 1            | 0           | 0           | 15           |                                                      |          | WD        |           |          |          |           | WD        | WD                |
| <b>DRB1*16:02:01G total</b>                                 | <b>16:02:01G total</b> |           |                                               | <b>4826</b> | <b>14749</b> | <b>22282</b> | <b>3712</b> | <b>12891</b> | <b>1229</b> | <b>7639</b> | <b>67328</b> | <b>C</b>                                             | <b>C</b> | <b>C</b>  | <b>C</b>  | <b>C</b> | <b>C</b> | <b>C</b>  | <b>C</b>  | <b>C</b>          |
| DRB1*16:02:01G                                              | 16:02:01G              |           | 16:02:01G                                     | 291         | 5247         | 5965         | 430         | 1502         | 30          | 1966        | 15431        | C                                                    | C        | C         | C         | C        | C        | C         | C         | C                 |
| DRB1*16:02:01                                               | 16:02:01               |           | 16:02:01G                                     | 4512        | 9278         | 16278        | 3278        | 10817        | 1151        | 5603        | 50917        | C                                                    | C        | C         | C         | C        | C        | C         | C         | C                 |
| DRB1*16:02:01:01                                            | 16:02:01:01            | HLA00878  | 16:02:01G                                     | 0           | 43           | 0            | 0           | 1            | 1           | 3           | 48           |                                                      | I        |           |           |          |          |           | WD        | I                 |
| DRB1*16:02:01:02                                            | 16:02:01:02            | HLA14831  | 16:02:01G                                     | 23          | 181          | 39           | 4           | 571          | 47          | 67          | 932          | WD                                                   | C        | WD        |           | C        | C        | I         | I         | C                 |
| DRB1*16:02:02                                               | 16:02:02               | HLA00879  |                                               | 0           | 0            | 0            | 0           | 0            | 0           | 1           | 1            |                                                      |          |           |           |          |          |           |           |                   |
| DRB1*16:02:06                                               | 16:02:06               | HLA14560  |                                               | 0           | 0            | 0            | 0           | 1            | 0           | 1           | 2            |                                                      |          |           |           |          |          |           |           |                   |
| DRB1*16:03                                                  | 16:03                  | HLA00880  |                                               | 0           | 0            | 1            | 0           | 0            | 0           | 0           | 1            |                                                      |          |           |           |          |          |           |           |                   |
| <b>DRB1*16:04 total</b>                                     | <b>16:04 total</b>     |           |                                               | <b>0</b>    | <b>0</b>     | <b>50</b>    | <b>1</b>    | <b>1</b>     | <b>0</b>    | <b>11</b>   | <b>63</b>    |                                                      |          | <b>WD</b> |           |          |          | <b>WD</b> | <b>WD</b> | <b>WD</b>         |
| DRB1*16:04                                                  | 16:04                  |           |                                               | 0           | 0            | 49           | 1           | 1            | 0           | 11          | 62           |                                                      |          | WD        |           |          |          | WD        | WD        | WD                |
| DRB1*16:04:01                                               | 16:04:01               | HLA00881  |                                               | 0           | 0            | 1            | 0           | 0            | 0           | 0           | 1            |                                                      |          |           |           |          |          |           |           |                   |
| <b>DRB1*16:05 total</b>                                     | <b>16:05 total</b>     |           |                                               | <b>0</b>    | <b>15</b>    | <b>553</b>   | <b>170</b>  | <b>4</b>     | <b>0</b>    | <b>22</b>   | <b>764</b>   |                                                      | <b>I</b> | <b>I</b>  | <b>C</b>  |          |          | <b>I</b>  | <b>I</b>  | <b>C</b>          |
| DRB1*16:05                                                  | 16:05                  |           |                                               | 0           | 0            | 41           | 7           | 1            | 0           | 1           | 50           |                                                      |          | WD        | WD        |          |          |           | WD        | WD                |
| DRB1*16:05:01                                               | 16:05:01               | HLA00882  |                                               | 0           | 15           | 511          | 163         | 3            | 0           | 21          | 713          |                                                      | I        | I         | C         |          |          | I         | I         | C                 |
| DRB1*16:05:02                                               | 16:05:02               | HLA01838  |                                               | 0           | 0            | 1            | 0           | 0            | 0           | 0           | 1            |                                                      |          |           |           |          |          |           |           |                   |
| DRB1*16:07                                                  | 16:07                  | HLA00884  |                                               | 0           | 0            | 92           | 5           | 37           | 1           | 46          | 181          |                                                      |          | WD        | WD        | I        |          |           | I         | I                 |
| DRB1*16:08                                                  | 16:08                  | HLA00885  |                                               | 0           | 0            | 2            | 1           | 0            | 0           | 14          | 17           |                                                      |          |           |           |          |          |           | I         | WD                |
| <b>DRB1*16:09 total</b>                                     | <b>16:09 total</b>     |           |                                               | <b>0</b>    | <b>1</b>     | <b>69</b>    | <b>6</b>    | <b>2</b>     | <b>0</b>    | <b>2</b>    | <b>80</b>    |                                                      |          | <b>WD</b> | <b>WD</b> |          |          |           | <b>WD</b> | <b>WD</b>         |
| DRB1*16:09                                                  | 16:09                  |           |                                               | 0           | 0            | 19           | 1           | 0            | 0           | 1           | 21           |                                                      |          | WD        |           |          |          |           | WD        | WD                |
| DRB1*16:09:01                                               | 16:09:01               | HLA02130  |                                               | 0           | 1            | 50           | 5           | 2            | 0           | 1           | 59           |                                                      |          | WD        | WD        |          |          |           | WD        | WD                |
| DRB1*16:10                                                  | 16:10                  | HLA02345  |                                               | 4           | 91           | 2            | 0           | 0            | 1           | 1           | 99           |                                                      | I        |           |           |          |          |           | WD        | I                 |



| Supplemental Table 11: HLA-DRB1 Allele Summary <sup>a</sup> |                    |           | Allele Count by Population Group <sup>b</sup> |               |                |                 |               |               |              |                |                 | 3.0.0 CIWD Category by Population Group <sup>c</sup> |     |      |      |     |     |     |       |                   |
|-------------------------------------------------------------|--------------------|-----------|-----------------------------------------------|---------------|----------------|-----------------|---------------|---------------|--------------|----------------|-----------------|------------------------------------------------------|-----|------|------|-----|-----|-----|-------|-------------------|
| Allele                                                      | Genomic Typing     | Allele ID | G group                                       | AFA           | API            | EURO            | MENA          | HIS           | NAM          | UNK            | Total           | AFA                                                  | API | EURO | MENA | HIS | NAM | UNK | Total | Highest Frequency |
| DRB1*16:12                                                  | 16:12              | HLA03043  |                                               | 0             | 0              | 1               | 0             | 55            | 2            | 4              | 62              |                                                      |     |      |      | I   |     |     | WD    | I                 |
| DRB1*16:13N                                                 | 16:13N             | HLA03062  |                                               | 0             | 0              | 0               | 0             | 0             | 0            | 1              | 1               |                                                      |     |      |      |     |     |     |       |                   |
| DRB1*16:14                                                  | 16:14              | HLA03995  |                                               | 3             | 0              | 0               | 0             | 0             | 0            | 0              | 3               |                                                      |     |      |      |     |     |     |       |                   |
| DRB1*16:15                                                  | 16:15              | HLA04359  |                                               | 1             | 0              | 6               | 0             | 1             | 0            | 2              | 10              |                                                      |     | WD   |      |     |     |     | WD    | WD                |
| DRB1*16:21N                                                 | 16:21N             | HLA09106  |                                               | 0             | 2              | 0               | 0             | 0             | 0            | 0              | 2               |                                                      |     |      |      |     |     |     |       |                   |
| DRB1*16:22                                                  | 16:22              | HLA09323  |                                               | 0             | 0              | 4               | 0             | 5             | 0            | 2              | 11              |                                                      |     |      |      | WD  |     |     | WD    | WD                |
| DRB1*16:23                                                  | 16:23              | HLA09460  |                                               | 0             | 0              | 1               | 0             | 1             | 0            | 0              | 2               |                                                      |     |      |      |     |     |     |       |                   |
| DRB1*16:25                                                  | 16:25              | HLA12804  |                                               | 0             | 0              | 2               | 0             | 0             | 0            | 0              | 2               |                                                      |     |      |      |     |     |     |       |                   |
| DRB1*16:26                                                  | 16:26              | HLA12806  |                                               | 0             | 0              | 1               | 0             | 1             | 0            | 2              | 4               |                                                      |     |      |      |     |     |     |       |                   |
| DRB1*16:30                                                  | 16:30              | HLA13152  |                                               | 0             | 0              | 1               | 0             | 0             | 0            | 0              | 1               |                                                      |     |      |      |     |     |     |       |                   |
| DRB1*16:31                                                  | 16:31              | HLA13154  |                                               | 0             | 0              | 1               | 0             | 0             | 0            | 0              | 1               |                                                      |     |      |      |     |     |     |       |                   |
| DRB1*16:33                                                  | 16:33              | HLA13160  |                                               | 0             | 0              | 1               | 0             | 0             | 0            | 0              | 1               |                                                      |     |      |      |     |     |     |       |                   |
| DRB1*16:34                                                  | 16:34              | HLA13245  |                                               | 0             | 0              | 1               | 0             | 0             | 0            | 0              | 1               |                                                      |     |      |      |     |     |     |       |                   |
| DRB1*16:35                                                  | 16:35              | HLA13585  |                                               | 0             | 2              | 0               | 0             | 0             | 0            | 0              | 2               |                                                      |     |      |      |     |     |     |       |                   |
| <b>DRB1*16:38 total</b>                                     | <b>16:38 total</b> |           |                                               | <b>0</b>      | <b>4</b>       | <b>0</b>        | <b>0</b>      | <b>0</b>      | <b>0</b>     | <b>0</b>       | <b>4</b>        |                                                      |     |      |      |     |     |     |       |                   |
| DRB1*16:38                                                  | 16:38              |           |                                               | 0             | 3              | 0               | 0             | 0             | 0            | 0              | 3               |                                                      |     |      |      |     |     |     |       |                   |
| DRB1*16:38:02                                               | 16:38:02           | HLA17920  |                                               | 0             | 1              | 0               | 0             | 0             | 0            | 0              | 1               |                                                      |     |      |      |     |     |     |       |                   |
| DRB1*16:CODE                                                | 16:CODE            |           |                                               | 179           | 218            | 5598            | 64            | 672           | 49           | 224            | 7004            | NA                                                   | NA  | NA   | NA   | NA  | NA  | NA  | NA    | NA                |
| <b>DRB1*Total</b>                                           | <b>Total</b>       |           |                                               | <b>389241</b> | <b>1318229</b> | <b>11938778</b> | <b>403373</b> | <b>700830</b> | <b>66984</b> | <b>1321251</b> | <b>16138686</b> |                                                      |     |      |      |     |     |     |       |                   |

C, common; I, intermediate; WD, well-documented; NA, not applicable

<sup>a</sup> All alleles observed in the current dataset are included in this table. Note that alleles are not in numerical order; alleles within a G group are clustered together. P group "two-field" total (e.g., written as "DRB1\*01:01 total") and G group total summary rows are provided. The table does not list all alleles from IPD-IMGT version 3.31.0, if not present in the study dataset.

<sup>b</sup> Population groups include: AFA (African/African American), API (Asian/Pacific Islands), EURO (European/European descent), MENA (Middle East/North Coast of Africa), HIS (South or Central America/Hispanic/Latino), NAM (Native American populations) and UNK (unknown/not asked/multiple ancestries/other). Total is the overall population i.e., all groups combined.

| Supplemental Table 11: HLA-DRB1 Allele Summary <sup>a</sup> |                |           |         | Allele Count by Population Group <sup>b</sup> |     |      |      |     |     |     |       | 3.0.0 CIWD Category by Population Group <sup>c</sup> |     |      |      |     |     |     |       |                   |
|-------------------------------------------------------------|----------------|-----------|---------|-----------------------------------------------|-----|------|------|-----|-----|-----|-------|------------------------------------------------------|-----|------|------|-----|-----|-----|-------|-------------------|
| Allele                                                      | Genomic Typing | Allele ID | G group | AFA                                           | API | EURO | MENA | HIS | NAM | UNK | Total | AFA                                                  | API | EURO | MENA | HIS | NAM | UNK | Total | Highest Frequency |

<sup>a</sup> Allele frequency is calculated by dividing the number of times the “allele” of interest is observed in a population by the total number of copies of all the alleles at that particular genetic locus in the population (reported as the last row in this table and also in Table 2b). The total number of copies is calculated by multiplying the number of individuals times two for all loci except DRB3/4/5. For DRB3/4/5, the number of assignments was used as the total. The CIWD status is determined based on the allele frequency. Allele frequency data will be provided on the website of the next International HLA and Immunogenetics Workshop (<https://www.ihw18.org/>). Highest frequency is the highest CIWD designation among all the individual groups.

<sup>d</sup> "CODE" is generically defined as a summary category of submitted HLA typing, including NMDP multiple allele codes, with ambiguities that are not within a single P or G group. "NEW" is a summary category for assignments of novel alleles that did not yet receive a nomenclature assignment. The CODE and NEW categories add to the total number of alleles but should not be assigned CIWD designations (labeled as NA, not applicable) as they do not represent a consistent allele designation (i.e., the NEW category may contain alleles with different DNA sequences that are unrelated to one another).

<sup>e</sup> DRB1\*Total is the total number of allele assignments for the population group and is based on two times the number of individuals in the group. This number is also listed in Table 2b. It is not the sum of the column as alleles are not counted more than once. For example, when evaluating frequencies at the level of G resolution, individual alleles that make up the G group (e.g., A\*80:01:01, A\*80:01:01:01, A\*80:01:01:02, A\*80:01:01G) are not included in the count because these alleles are summed up in the total G designation (e.g., "A\*80:01:01G total").
