# Supplementary material for: Common, intermediate and well‐documented HLA alleles in world populations: CIWD version 3.0.0
Source: PubMed Central journal article supplement (PMC7317522; doi:10.1111/tan.13811), 2020-01-31
Supplement: TAN-95-516-s012.pdf [file TAN-95-516-s012.pdf]

| Supplemental Table 12: HLA-DRB3 Allele Summary <sup>a</sup> |                        |           | Allele Count by Population Group <sup>b</sup> |              |              |               |             |              |             |              |               | 3.0.0 CIWD Category by Population Group <sup>c</sup> |     |      |      |     |     |     |       |
|-------------------------------------------------------------|------------------------|-----------|-----------------------------------------------|--------------|--------------|---------------|-------------|--------------|-------------|--------------|---------------|------------------------------------------------------|-----|------|------|-----|-----|-----|-------|
| Allele                                                      | Genomic Typing         | Allele ID | G group                                       | AFA          | API          | EURO          | MENA        | HIS          | NAM         | UNK          | Total         | AFA                                                  | API | EURO | MENA | HIS | NAM | UNK | Total |
| <b>DRB3*01:01 total</b>                                     | <b>01:01 total</b>     |           |                                               | <b>11527</b> | <b>6687</b>  | <b>111562</b> | <b>1436</b> | <b>33353</b> | <b>2813</b> | <b>20489</b> | <b>187867</b> | WD                                                   | WD  | WD   | WD   | WD  | WD  | WD  | WD    |
| DRB3*01:01                                                  | 01:01                  |           |                                               | 1960         | 726          | 22822         | 376         | 7296         | 485         | 3136         | 36801         | WD                                                   | WD  | WD   | WD   | WD  | WD  | WD  | WD    |
| <b>DRB3*01:01:02G total</b>                                 | <b>01:01:02G total</b> |           |                                               | <b>9567</b>  | <b>5941</b>  | <b>88733</b>  | <b>1060</b> | <b>26057</b> | <b>2328</b> | <b>17345</b> | <b>151031</b> | WD                                                   | WD  | WD   | WD   | WD  | WD  | WD  | WD    |
| DRB3*01:01:02G                                              | 01:01:02G              |           | 01:01:02G                                     | 8023         | 4990         | 72273         | 865         | 21819        | 1947        | 14836        | 124753        | WD                                                   | WD  | WD   | WD   | WD  | WD  | WD  | WD    |
| DRB3*01:01:02                                               | 01:01:02               |           | 01:01:02G                                     | 1540         | 949          | 16284         | 194         | 4217         | 377         | 2493         | 26054         | WD                                                   | WD  | WD   | WD   | WD  | WD  | WD  | WD    |
| DRB3*01:01:02:01                                            | 01:01:02:01            | HLA00887  | 01:01:02G                                     | 4            | 2            | 157           | 1           | 21           | 4           | 15           | 204           |                                                      |     | WD   |      | WD  |     | WD  | WD    |
| DRB3*01:16                                                  | 01:16                  | HLA13234  | 01:01:02G                                     | 0            | 0            | 19            | 0           | 0            | 0           | 1            | 20            |                                                      |     | WD   |      |     |     |     | WD    |
| DRB3*01:01:03                                               | 01:01:03               | HLA00888  |                                               | 0            | 0            | 6             | 0           | 0            | 0           | 0            | 6             |                                                      |     | WD   |      |     |     |     | WD    |
| DRB3*01:01:05                                               | 01:01:05               | HLA03432  |                                               | 0            | 20           | 1             | 0           | 0            | 0           | 8            | 29            |                                                      | WD  |      |      |     |     | WD  | WD    |
| DRB3*01:02                                                  | 01:02                  | HLA00890  |                                               | 3            | 0            | 21            | 0           | 0            | 0           | 5            | 29            |                                                      |     | WD   |      |     |     | WD  | WD    |
| DRB3*01:04                                                  | 01:04                  | HLA00892  |                                               | 0            | 0            | 1             | 0           | 1            | 0           | 1            | 3             |                                                      |     |      |      |     |     |     |       |
| DRB3*01:05                                                  | 01:05                  | HLA00893  |                                               | 2            | 0            | 1             | 0           | 18           | 1           | 4            | 26            |                                                      |     |      |      | WD  |     |     | WD    |
| DRB3*01:06                                                  | 01:06                  | HLA01092  |                                               | 1            | 0            | 1             | 0           | 6            | 0           | 0            | 8             |                                                      |     |      |      | WD  |     |     | WD    |
| DRB3*01:08                                                  | 01:08                  | HLA01462  |                                               | 0            | 0            | 0             | 0           | 2            | 0           | 0            | 2             |                                                      |     |      |      |     |     |     |       |
| DRB3*01:09                                                  | 01:09                  | HLA01505  |                                               | 0            | 2            | 0             | 0           | 0            | 0           | 2            | 4             |                                                      |     |      |      |     |     |     |       |
| DRB3*01:10                                                  | 01:10                  | HLA01518  |                                               | 0            | 0            | 4             | 0           | 0            | 0           | 0            | 4             |                                                      |     |      |      |     |     |     |       |
| DRB3*01:11                                                  | 01:11                  | HLA01818  |                                               | 0            | 7            | 1             | 1           | 0            | 0           | 0            | 9             |                                                      | WD  |      |      |     |     |     | WD    |
| DRB3*01:12                                                  | 01:12                  | HLA03433  |                                               | 0            | 3            | 0             | 0           | 0            | 0           | 0            | 3             |                                                      |     |      |      |     |     |     |       |
| DRB3*01:13                                                  | 01:13                  | HLA03434  |                                               | 0            | 8            | 0             | 0           | 0            | 0           | 3            | 11            |                                                      | WD  |      |      |     |     |     | WD    |
| DRB3*01:23                                                  | 01:23                  | HLA15086  |                                               | 0            | 0            | 4             | 0           | 0            | 0           | 0            | 4             |                                                      |     |      |      |     |     |     |       |
| DRB3*01:25                                                  | 01:25                  | HLA15337  |                                               | 0            | 0            | 0             | 0           | 1            | 0           | 0            | 1             |                                                      |     |      |      |     |     |     |       |
| DRB3*01:27                                                  | 01:27                  | HLA15339  |                                               | 0            | 0            | 2             | 0           | 0            | 0           | 0            | 2             |                                                      |     |      |      |     |     |     |       |
| DRB3*01:29                                                  | 01:29                  | HLA15341  |                                               | 1            | 0            | 0             | 0           | 0            | 0           | 0            | 1             |                                                      |     |      |      |     |     |     |       |
| DRB3*01:31                                                  | 01:31                  | HLA15343  |                                               | 0            | 2            | 0             | 0           | 0            | 0           | 0            | 2             |                                                      |     |      |      |     |     |     |       |
| DRB3*01:35                                                  | 01:35                  | HLA15347  |                                               | 0            | 0            | 0             | 0           | 8            | 0           | 0            | 8             |                                                      |     |      |      | WD  |     |     | WD    |
| DRB3*01:CODE <sup>d</sup>                                   | 01:CODE                |           |                                               | 21412        | 11329        | 126920        | 1207        | 36108        | 4274        | 16428        | 217678        | NA                                                   | NA  | NA   | NA   | NA  | NA  | NA  | NA    |
| <b>DRB3*02:01 total</b>                                     | <b>02:01 total</b>     |           |                                               | <b>39</b>    | <b>37</b>    | <b>2374</b>   | <b>233</b>  | <b>611</b>   | <b>40</b>   | <b>375</b>   | <b>3709</b>   | WD                                                   | WD  | WD   | WD   | WD  | WD  | WD  | WD    |
| <b>DRB3*02:01:01G total</b>                                 | <b>02:01:01G total</b> |           |                                               | <b>39</b>    | <b>37</b>    | <b>2374</b>   | <b>233</b>  | <b>611</b>   | <b>40</b>   | <b>375</b>   | <b>3709</b>   | WD                                                   | WD  | WD   | WD   | WD  | WD  | WD  | WD    |
| DRB3*02:01:01G                                              | 02:01:01G              |           | 02:01:01G                                     | 31           | 35           | 2042          | 207         | 555          | 35          | 346          | 3251          | WD                                                   | WD  | WD   | WD   | WD  | WD  | WD  | WD    |
| DRB3*02:24                                                  | 02:24                  | HLA03574  | 02:01:01G                                     | 8            | 2            | 332           | 26          | 56           | 5           | 29           | 458           | WD                                                   |     | WD   | WD   | WD  | WD  | WD  | WD    |
| <b>DRB3*02:02 total</b>                                     | <b>02:02 total</b>     |           |                                               | <b>22758</b> | <b>27592</b> | <b>142250</b> | <b>5251</b> | <b>42336</b> | <b>3735</b> | <b>29165</b> | <b>273087</b> | WD                                                   | WD  | WD   | WD   | WD  | WD  | WD  | WD    |

| Supplemental Table 12: HLA-DRB3 Allele Summary <sup>a</sup> |                        |           | Allele Count by Population Group <sup>b</sup> |              |              |               |             |              |             |              |               | 3.0.0 CIWD Category by Population Group <sup>c</sup> |           |           |           |           |           |           |           |
|-------------------------------------------------------------|------------------------|-----------|-----------------------------------------------|--------------|--------------|---------------|-------------|--------------|-------------|--------------|---------------|------------------------------------------------------|-----------|-----------|-----------|-----------|-----------|-----------|-----------|
| Allele                                                      | Genomic Typing         | Allele ID | G group                                       | AFA          | API          | EURO          | MENA        | HIS          | NAM         | UNK          | Total         | AFA                                                  | API       | EURO      | MENA      | HIS       | NAM       | UNK       | Total     |
| DRB3*02:02                                                  | 02:02                  |           |                                               | 2            | 1            | 0             | 1           | 3            | 0           | 1            | 8             |                                                      |           |           |           |           |           |           | WD        |
| <b>DRB3*02:02:01G total</b>                                 | <b>02:02:01G total</b> |           |                                               | <b>22755</b> | <b>27584</b> | <b>142235</b> | <b>5248</b> | <b>42333</b> | <b>3734</b> | <b>29162</b> | <b>273051</b> | <b>WD</b>                                            | <b>WD</b> | <b>WD</b> | <b>WD</b> | <b>WD</b> | <b>WD</b> | <b>WD</b> | <b>WD</b> |
| DRB3*02:02:01G                                              | 02:02:01G              |           | 02:02:01G                                     | 19766        | 23756        | 121610        | 4407        | 37095        | 3265        | 25855        | 235754        | WD                                                   | WD        | WD        | WD        | WD        | WD        | WD        | WD        |
| DRB3*02:02:01                                               | 02:02:01               |           | 02:02:01G                                     | 2977         | 3820         | 20531         | 836         | 5213         | 467         | 3293         | 37137         | WD                                                   | WD        | WD        | WD        | WD        | WD        | WD        | WD        |
| DRB3*02:02:01:01                                            | 02:02:01:01            | HLA00895  | 02:02:01G                                     | 10           | 2            | 15            | 1           | 3            | 0           | 8            | 39            | WD                                                   |           | WD        |           |           |           | WD        | WD        |
| DRB3*02:02:01:02                                            | 02:02:01:02            | HLA06593  | 02:02:01G                                     | 2            | 6            | 78            | 4           | 22           | 2           | 5            | 119           |                                                      | WD        | WD        |           | WD        |           | WD        | WD        |
| DRB3*02:29N                                                 | 02:29N                 | HLA07562  | 02:02:01G                                     | 0            | 0            | 1             | 0           | 0            | 0           | 1            | 2             |                                                      |           |           |           |           |           |           |           |
| DRB3*02:02:02                                               | 02:02:02               | HLA01094  |                                               | 1            | 0            | 1             | 2           | 0            | 0           | 0            | 4             |                                                      |           |           |           |           |           |           |           |
| DRB3*02:02:03                                               | 02:02:03               | HLA01160  |                                               | 0            | 0            | 4             | 0           | 0            | 0           | 0            | 4             |                                                      |           |           |           |           |           |           |           |
| DRB3*02:02:04                                               | 02:02:04               | HLA01608  |                                               | 0            | 7            | 0             | 0           | 0            | 0           | 1            | 8             |                                                      | WD        |           |           |           |           |           | WD        |
| DRB3*02:02:06                                               | 02:02:06               | HLA14222  |                                               | 0            | 0            | 11            | 0           | 0            | 1           | 2            | 14            |                                                      |           | WD        |           |           |           |           | WD        |
| DRB3*02:03                                                  | 02:03                  | HLA00896  |                                               | 1            | 1            | 30            | 0           | 1            | 0           | 5            | 38            |                                                      |           | WD        |           |           |           | WD        | WD        |
| DRB3*02:04                                                  | 02:04                  | HLA00897  |                                               | 0            | 0            | 5             | 0           | 0            | 1           | 1            | 7             |                                                      |           | WD        |           |           |           |           | WD        |
| DRB3*02:05                                                  | 02:05                  | HLA00898  |                                               | 0            | 0            | 7             | 0           | 13           | 1           | 3            | 24            |                                                      |           | WD        |           | WD        |           |           | WD        |
| DRB3*02:06                                                  | 02:06                  | HLA00899  |                                               | 0            | 1            | 8             | 1           | 0            | 0           | 3            | 13            |                                                      |           | WD        |           |           |           |           | WD        |
| DRB3*02:07                                                  | 02:07                  | HLA00900  |                                               | 6            | 2            | 0             | 0           | 0            | 0           | 5            | 13            | WD                                                   |           |           |           |           |           | WD        | WD        |
| DRB3*02:08                                                  | 02:08                  | HLA00901  |                                               | 0            | 0            | 1             | 0           | 0            | 0           | 0            | 1             |                                                      |           |           |           |           |           |           |           |
| DRB3*02:09                                                  | 02:09                  | HLA01095  |                                               | 1            | 2            | 7             | 0           | 3            | 0           | 1            | 14            |                                                      |           | WD        |           |           |           |           | WD        |
| DRB3*02:10                                                  | 02:10                  | HLA01157  |                                               | 34           | 7            | 71            | 2           | 42           | 3           | 18           | 177           | WD                                                   | WD        | WD        |           | WD        |           | WD        | WD        |
| DRB3*02:11                                                  | 02:11                  | HLA01165  |                                               | 1            | 1            | 22            | 1           | 6            | 1           | 5            | 37            |                                                      |           | WD        |           | WD        |           | WD        | WD        |
| DRB3*02:12                                                  | 02:12                  | HLA01185  |                                               | 1            | 0            | 31            | 0           | 2            | 0           | 2            | 36            |                                                      |           | WD        |           |           |           |           | WD        |
| DRB3*02:13                                                  | 02:13                  | HLA01190  |                                               | 0            | 0            | 13            | 0           | 0            | 0           | 3            | 16            |                                                      |           | WD        |           |           |           |           | WD        |
| DRB3*02:15                                                  | 02:15                  | HLA01542  |                                               | 0            | 0            | 4             | 0           | 0            | 0           | 0            | 4             |                                                      |           |           |           |           |           |           |           |
| DRB3*02:16                                                  | 02:16                  | HLA01560  |                                               | 0            | 0            | 7             | 0           | 0            | 0           | 1            | 8             |                                                      |           | WD        |           |           |           |           | WD        |
| DRB3*02:17                                                  | 02:17                  | HLA01570  |                                               | 1            | 2            | 68            | 1           | 8            | 1           | 16           | 97            |                                                      |           | WD        |           | WD        |           | WD        | WD        |
| DRB3*02:18                                                  | 02:18                  | HLA01769  |                                               | 0            | 0            | 2             | 0           | 0            | 0           | 0            | 2             |                                                      |           |           |           |           |           |           |           |
| DRB3*02:19                                                  | 02:19                  | HLA01870  |                                               | 0            | 1            | 5             | 0           | 0            | 0           | 0            | 6             |                                                      |           | WD        |           |           |           |           | WD        |
| DRB3*02:20                                                  | 02:20                  | HLA02151  |                                               | 0            | 2            | 1             | 0           | 0            | 2           | 0            | 5             |                                                      |           |           |           |           |           |           | WD        |
| DRB3*02:21                                                  | 02:21                  | HLA02410  |                                               | 0            | 1            | 9             | 0           | 8            | 0           | 0            | 18            |                                                      |           | WD        |           | WD        |           |           | WD        |
| <b>DRB3*02:22 total</b>                                     | <b>02:22 total</b>     |           |                                               | <b>1</b>     | <b>2</b>     | <b>7</b>      | <b>0</b>    | <b>0</b>     | <b>0</b>    | <b>1</b>     | <b>11</b>     |                                                      |           | <b>WD</b> |           |           |           |           | <b>WD</b> |
| DRB3*02:22                                                  | 02:22                  |           |                                               | 1            | 1            | 6             | 0           | 0            | 0           | 0            | 8             |                                                      |           | WD        |           |           |           |           | WD        |

| Supplemental Table 12: HLA-DRB3 Allele Summary <sup>a</sup> |                        |           | Allele Count by Population Group <sup>b</sup> |             |              |              |             |              |             |             |              | 3.0.0 CIWD Category by Population Group <sup>c</sup> |           |           |           |           |           |           |           |           |
|-------------------------------------------------------------|------------------------|-----------|-----------------------------------------------|-------------|--------------|--------------|-------------|--------------|-------------|-------------|--------------|------------------------------------------------------|-----------|-----------|-----------|-----------|-----------|-----------|-----------|-----------|
| Allele                                                      | Genomic Typing         | Allele ID | G group                                       | AFA         | API          | EURO         | MENA        | HIS          | NAM         | UNK         | Total        | AFA                                                  | API       | EURO      | MENA      | HIS       | NAM       | UNK       | Total     |           |
| DRB3*02:22:01                                               | 02:22:01               | HLA02765  |                                               | 0           | 1            | 1            | 0           | 0            | 0           | 1           | 3            |                                                      |           |           |           |           |           |           |           |           |
| DRB3*02:23                                                  | 02:23                  | HLA03064  |                                               | 0           | 0            | 6            | 0           | 0            | 0           | 0           | 6            |                                                      |           | WD        |           |           |           |           |           | WD        |
| DRB3*02:25                                                  | 02:25                  | HLA03989  |                                               | 0           | 4            | 17           | 0           | 0            | 0           | 1           | 22           |                                                      |           | WD        |           |           |           |           |           | WD        |
| DRB3*02:26                                                  | 02:26                  | HLA06515  |                                               | 0           | 0            | 4            | 0           | 0            | 0           | 0           | 4            |                                                      |           |           |           |           |           |           |           |           |
| DRB3*02:30                                                  | 02:30                  | HLA14373  |                                               | 1           | 0            | 0            | 0           | 0            | 0           | 1           | 2            |                                                      |           |           |           |           |           |           |           |           |
| <b>DRB3*02:31 total</b>                                     | <b>02:31 total</b>     |           |                                               | <b>0</b>    | <b>1</b>     | <b>0</b>     | <b>0</b>    | <b>0</b>     | <b>0</b>    | <b>0</b>    | <b>1</b>     |                                                      |           |           |           |           |           |           |           |           |
| DRB3*02:31:02                                               | 02:31:02               | HLA15358  |                                               | 0           | 1            | 0            | 0           | 0            | 0           | 0           | 1            |                                                      |           |           |           |           |           |           |           |           |
| DRB3*02:32                                                  | 02:32                  | HLA14375  |                                               | 1           | 11           | 5            | 0           | 3            | 0           | 3           | 23           |                                                      | WD        | WD        |           |           |           |           |           | WD        |
| DRB3*02:36                                                  | 02:36                  | HLA14624  |                                               | 0           | 0            | 1            | 0           | 0            | 0           | 0           | 1            |                                                      |           |           |           |           |           |           |           |           |
| DRB3*02:37                                                  | 02:37                  | HLA14856  |                                               | 0           | 0            | 1            | 0           | 0            | 0           | 0           | 1            |                                                      |           |           |           |           |           |           |           |           |
| DRB3*02:39                                                  | 02:39                  | HLA15012  |                                               | 0           | 0            | 0            | 0           | 1            | 0           | 0           | 1            |                                                      |           |           |           |           |           |           |           |           |
| DRB3*02:43                                                  | 02:43                  | HLA15355  |                                               | 1           | 0            | 0            | 0           | 0            | 0           | 0           | 1            |                                                      |           |           |           |           |           |           |           |           |
| DRB3*02:44                                                  | 02:44                  | HLA15356  |                                               | 0           | 0            | 1            | 0           | 1            | 0           | 0           | 2            |                                                      |           |           |           |           |           |           |           |           |
| DRB3*02:48                                                  | 02:48                  | HLA15362  |                                               | 0           | 0            | 0            | 0           | 1            | 0           | 0           | 1            |                                                      |           |           |           |           |           |           |           |           |
| DRB3*02:50                                                  | 02:50                  | HLA15364  |                                               | 0           | 1            | 0            | 0           | 0            | 1           | 0           | 2            |                                                      |           |           |           |           |           |           |           |           |
| DRB3*02:51                                                  | 02:51                  | HLA15365  |                                               | 0           | 0            | 0            | 0           | 28           | 1           | 3           | 32           |                                                      |           |           |           | WD        |           |           |           | WD        |
| DRB3*02:CODE                                                | 02:CODE                |           |                                               | 51186       | 65945        | 190855       | 5141        | 58030        | 6026        | 28158       | 405341       | NA                                                   | NA        | NA        | NA        | NA        | NA        | NA        | NA        | NA        |
| <b>DRB3*03:01 total</b>                                     | <b>03:01 total</b>     |           |                                               | <b>8841</b> | <b>15229</b> | <b>36004</b> | <b>1044</b> | <b>11457</b> | <b>1241</b> | <b>9460</b> | <b>83276</b> | <b>WD</b>                                            | <b>WD</b> | <b>WD</b> | <b>WD</b> | <b>WD</b> | <b>WD</b> | <b>WD</b> | <b>WD</b> | <b>WD</b> |
| DRB3*03:01                                                  | 03:01                  |           |                                               | 6241        | 10315        | 23778        | 677         | 7986         | 967         | 6577        | 56541        | WD                                                   | WD        | WD        | WD        | WD        | WD        | WD        | WD        | WD        |
| <b>DRB3*03:01:01G total</b>                                 | <b>03:01:01G total</b> |           |                                               | <b>2600</b> | <b>4908</b>  | <b>12226</b> | <b>367</b>  | <b>3471</b>  | <b>274</b>  | <b>2881</b> | <b>26727</b> | <b>WD</b>                                            | <b>WD</b> | <b>WD</b> | <b>WD</b> | <b>WD</b> | <b>WD</b> | <b>WD</b> | <b>WD</b> | <b>WD</b> |
| DRB3*03:01:01G                                              | 03:01:01G              |           | 03:01:01G                                     | 1409        | 2817         | 6781         | 176         | 2026         | 148         | 1727        | 15084        | WD                                                   | WD        | WD        | WD        | WD        | WD        | WD        | WD        | WD        |
| DRB3*03:01:01                                               | 03:01:01               | HLA00902  | 03:01:01G                                     | 1176        | 640          | 5428         | 171         | 1410         | 124         | 927         | 9876         | WD                                                   | WD        | WD        | WD        | WD        | WD        | WD        | WD        | WD        |
| DRB3*03:01:03                                               | 03:01:03               | HLA03573  | 03:01:01G                                     | 15          | 1451         | 17           | 20          | 35           | 2           | 227         | 1767         | WD                                                   | WD        | WD        | WD        | WD        |           |           | WD        | WD        |
| DRB3*03:01:05                                               | 03:01:05               | HLA15369  |                                               | 0           | 2            | 0            | 0           | 0            | 0           | 1           | 3            |                                                      |           |           |           |           |           |           |           |           |
| DRB3*03:01:02                                               | 03:01:02               | HLA01233  |                                               | 0           | 4            | 0            | 0           | 0            | 0           | 1           | 5            |                                                      |           |           |           |           |           |           |           | WD        |
| DRB3*03:02                                                  | 03:02                  | HLA00903  |                                               | 0           | 0            | 8            | 0           | 0            | 0           | 0           | 8            |                                                      |           | WD        |           |           |           |           |           | WD        |
| DRB3*03:03                                                  | 03:03                  | HLA00904  |                                               | 0           | 2            | 1            | 0           | 2            | 0           | 0           | 5            |                                                      |           |           |           |           |           |           |           | WD        |
| DRB3*03:04                                                  | 03:04                  | HLA14575  |                                               | 1           | 0            | 0            | 0           | 0            | 0           | 0           | 1            |                                                      |           |           |           |           |           |           |           |           |
| DRB3*03:05                                                  | 03:05                  | HLA14657  |                                               | 0           | 0            | 1            | 0           | 0            | 0           | 0           | 1            |                                                      |           |           |           |           |           |           |           |           |
| DRB3*03:06                                                  | 03:06                  | HLA14658  |                                               | 0           | 0            | 1            | 0           | 1            | 0           | 0           | 2            |                                                      |           |           |           |           |           |           |           |           |
| DRB3*03:08                                                  | 03:08                  | HLA15352  |                                               | 0           | 0            | 0            | 0           | 0            | 0           | 1           | 1            |                                                      |           |           |           |           |           |           |           |           |

| Supplemental Table 12: HLA-DRB3 Allele Summary <sup>a</sup> |                |           | Allele Count by Population Group <sup>b</sup> |               |               |               |              |               |              |               |                | 3.0.0 CIWD Category by Population Group <sup>c</sup> |     |      |      |     |     |     |       |
|-------------------------------------------------------------|----------------|-----------|-----------------------------------------------|---------------|---------------|---------------|--------------|---------------|--------------|---------------|----------------|------------------------------------------------------|-----|------|------|-----|-----|-----|-------|
| Allele                                                      | Genomic Typing | Allele ID | G group                                       | AFA           | API           | EURO          | MENA         | HIS           | NAM          | UNK           | Total          | AFA                                                  | API | EURO | MENA | HIS | NAM | UNK | Total |
| DRB3*03:09                                                  | 03:09          | HLA15354  |                                               | 0             | 2             | 0             | 0            | 0             | 0            | 0             | 2              |                                                      |     |      |      |     |     |     |       |
| DRB3*03:11                                                  | 03:11          | HLA15368  |                                               | 0             | 1             | 0             | 0            | 0             | 0            | 0             | 1              |                                                      |     |      |      |     |     |     |       |
| DRB3*03:CODE                                                | 03:CODE        |           |                                               | 3             | 6             | 7             | 0            | 2             | 1            | 1             | 20             | NA                                                   | NA  | NA   | NA   | NA  | NA  | NA  | NA    |
| <b>DRB3*Total <sup>e</sup></b>                              | <b>Total</b>   |           |                                               | <b>115823</b> | <b>126891</b> | <b>610352</b> | <b>14318</b> | <b>182053</b> | <b>18142</b> | <b>104165</b> | <b>1171744</b> |                                                      |     |      |      |     |     |     |       |

WD, well-documented; NA, not applicable

<sup>a</sup> All alleles observed in the current dataset are included in this table. Note that alleles are not in numerical order; alleles within a G group are clustered together. P group "two-field" total (e.g., written as "DRB3\*01:01 total") and G group total summary rows are provided. The table does not list all alleles from IPD-IMGT version 3.31.0, if not present in the study dataset.

<sup>b</sup> Population groups include: AFA (African/African American), API (Asian/Pacific Islands), EURO (European/European descent), MENA (Middle East/North Coast of Africa), HIS (South or Central America/Hispanic/Latino), NAM (Native American populations) and UNK (unknown/not asked/multiple ancestries/other). Total is the overall population i.e., all groups combined.

<sup>c</sup> Due to high submission of typing with ambiguity and uncertain denominator, only well-documented categories are assigned for this locus. Allele frequency is calculated by dividing the number of times the "allele" of interest is observed in a population by the total number of copies of all the alleles at that particular genetic locus in the population (reported as the last row in this table and also in Table 2b). The total number of copies is calculated by multiplying the number of individuals times two for all loci except DRB3/4/5. For DRB3/4/5, the number of assignments was used as the total. The CIWD status is determined based on the allele frequency. Allele frequency data will be provided on the website of the next International HLA and Immunogenetics Workshop (<https://www.ihw18.org/>).

<sup>d</sup> "CODE" is generically defined as a summary category of submitted HLA typing, including NMDP multiple allele codes, with ambiguities that are not within a single P or G group. "NEW" is a summary category for assignments of novel alleles that did not yet receive a nomenclature assignment. The CODE and NEW categories add to the total number of alleles but should not be assigned CIWD designations (labeled as NA, not applicable) as they do not represent a consistent allele designation (i.e., the NEW category may contain alleles with different DNA sequences that are unrelated to one another).

<sup>e</sup> DRB3\*Total is the total number of allele assignments for the population group. It is not the sum of the column as alleles are not counted more than once. For example, when evaluating frequencies at the level of G resolution, individual alleles that make up the G group (e.g., A\*80:01:01, A\*80:01:01:01, A\*80:01:01:02, A\*80:01:01G) are not included in the count because these alleles are summed up in the total G designation (e.g., "A\*80:01:01G total").
