# Supplementary material for: Common, intermediate and well‐documented HLA alleles in world populations: CIWD version 3.0.0
Source: PubMed Central journal article supplement (PMC7317522; doi:10.1111/tan.13811), 2020-01-31
Supplement: TAN-95-516-s014.pdf [file TAN-95-516-s014.pdf]

| Supplemental Table 14: HLA-DRB5 Allele Summary <sup>a</sup> |                        |           |           | Allele Count by Population Group <sup>b</sup> |              |              |            |              |             |              |               | 3.0.0 CIWD Category by Population Group <sup>c</sup> |     |      |      |     |     |     |       |
|-------------------------------------------------------------|------------------------|-----------|-----------|-----------------------------------------------|--------------|--------------|------------|--------------|-------------|--------------|---------------|------------------------------------------------------|-----|------|------|-----|-----|-----|-------|
| Allele                                                      | Genomic Typing         | Allele ID | G group   | AFA                                           | API          | EURO         | MENA       | HIS          | NAM         | UNK          | Total         | AFA                                                  | API | EURO | MENA | HIS | NAM | UNK | Total |
| <b>DRB5*01:01 total</b>                                     | <b>01:01 total</b>     |           |           | <b>11894</b>                                  | <b>16874</b> | <b>99254</b> | <b>962</b> | <b>18472</b> | <b>1640</b> | <b>18910</b> | <b>168006</b> | WD                                                   | WD  | WD   | WD   | WD  | WD  | WD  | WD    |
| DRB5*01:01                                                  | 01:01                  |           |           | 2104                                          | 1847         | 21727        | 250        | 4806         | 311         | 3649         | 34694         | WD                                                   | WD  | WD   | WD   | WD  | WD  | WD  | WD    |
| <b>DRB5*01:01:01G total</b>                                 | <b>01:01:01G total</b> |           |           | <b>9788</b>                                   | <b>15027</b> | <b>77491</b> | <b>712</b> | <b>13664</b> | <b>1328</b> | <b>15252</b> | <b>133262</b> | WD                                                   | WD  | WD   | WD   | WD  | WD  | WD  | WD    |
| DRB5*01:01:01G                                              | 01:01:01G              |           | 01:01:01G | 3740                                          | 5593         | 32412        | 204        | 5141         | 554         | 5198         | 52842         | WD                                                   | WD  | WD   | WD   | WD  | WD  | WD  | WD    |
| DRB5*01:01:01                                               | 01:01:01               | HLA00915  | 01:01:01G | 6048                                          | 9434         | 45079        | 508        | 8523         | 774         | 10054        | 80420         | WD                                                   | WD  | WD   | WD   | WD  | WD  | WD  | WD    |
| DRB5*01:01:02                                               | 01:01:02               | HLA00916  |           | 2                                             | 0            | 36           | 0          | 2            | 1           | 9            | 50            |                                                      |     | WD   |      |     |     | WD  | WD    |
| <b>DRB5*01:02 total</b>                                     | <b>01:02 total</b>     |           |           | <b>227</b>                                    | <b>9642</b>  | <b>6162</b>  | <b>805</b> | <b>2962</b>  | <b>256</b>  | <b>2415</b>  | <b>22469</b>  | WD                                                   | WD  | WD   | WD   | WD  | WD  | WD  | WD    |
| <b>DRB5*01:02:01G total</b>                                 | <b>01:02:01G total</b> |           |           | <b>232</b>                                    | <b>9857</b>  | <b>6165</b>  | <b>805</b> | <b>2963</b>  | <b>256</b>  | <b>2457</b>  | <b>22735</b>  | WD                                                   | WD  | WD   | WD   | WD  | WD  | WD  | WD    |
| DRB5*01:02                                                  | 01:02                  | HLA00917  | 01:02:01G | 20                                            | 1109         | 827          | 111        | 317          | 33          | 225          | 2642          | WD                                                   | WD  | WD   | WD   | WD  | WD  | WD  | WD    |
| DRB5*01:02:01G                                              | 01:02:01G              |           | 01:02:01G | 207                                           | 8533         | 5335         | 694        | 2645         | 223         | 2190         | 19827         | WD                                                   | WD  | WD   | WD   | WD  | WD  | WD  | WD    |
| DRB5*01:08N                                                 | 01:08N                 | HLA00923  | 01:02:01G | 5                                             | 215          | 3            | 0          | 1            | 0           | 42           | 266           | WD                                                   | WD  |      |      |     |     | WD  | WD    |
| DRB5*01:03                                                  | 01:03                  | HLA00918  |           | 12                                            | 348          | 2            | 2          | 3            | 2           | 49           | 418           | WD                                                   | WD  |      |      |     |     | WD  | WD    |
| DRB5*01:04                                                  | 01:04                  | HLA00919  |           | 2                                             | 0            | 0            | 0          | 3            | 0           | 0            | 5             |                                                      |     |      |      |     |     |     | WD    |
| DRB5*01:05                                                  | 01:05                  | HLA00920  |           | 0                                             | 2            | 23           | 4          | 1            | 0           | 3            | 33            |                                                      |     | WD   |      |     |     |     | WD    |
| DRB5*01:06                                                  | 01:06                  | HLA00921  |           | 0                                             | 0            | 4            | 0          | 0            | 0           | 1            | 5             |                                                      |     |      |      |     |     |     | WD    |
| DRB5*01:07                                                  | 01:07                  | HLA00922  |           | 0                                             | 0            | 4            | 0          | 0            | 0           | 0            | 4             |                                                      |     |      |      |     |     |     |       |
| DRB5*01:09                                                  | 01:09                  | HLA00924  |           | 0                                             | 0            | 3            | 0          | 0            | 1           | 1            | 5             |                                                      |     |      |      |     |     |     | WD    |
| DRB5*01:10N                                                 | 01:10N                 | HLA01012  |           | 3                                             | 38           | 38           | 7          | 8            | 1           | 9            | 104           |                                                      | WD  | WD   | WD   | WD  |     | WD  | WD    |
| DRB5*01:11                                                  | 01:11                  | HLA01638  |           | 0                                             | 6            | 2            | 0          | 0            | 0           | 2            | 10            |                                                      | WD  |      |      |     |     |     | WD    |
| DRB5*01:12                                                  | 01:12                  | HLA01634  |           | 0                                             | 0            | 1            | 0          | 0            | 0           | 1            | 2             |                                                      |     |      |      |     |     |     |       |
| DRB5*01:13                                                  | 01:13                  | HLA01871  |           | 0                                             | 0            | 1            | 0          | 0            | 0           | 0            | 1             |                                                      |     |      |      |     |     |     |       |
| DRB5*01:14                                                  | 01:14                  | HLA04132  |           | 1                                             | 0            | 0            | 0          | 0            | 0           | 0            | 1             |                                                      |     |      |      |     |     |     |       |
| DRB5*01:15                                                  | 01:15                  | HLA11771  |           | 0                                             | 6            | 0            | 0          | 0            | 0           | 1            | 7             |                                                      | WD  |      |      |     |     |     | WD    |
| DRB5*01:17                                                  | 01:17                  | HLA14576  |           | 0                                             | 0            | 1            | 0          | 0            | 0           | 0            | 1             |                                                      |     |      |      |     |     |     |       |
| DRB5*01:18                                                  | 01:18                  | HLA14666  |           | 0                                             | 0            | 1            | 0          | 0            | 0           | 0            | 1             |                                                      |     |      |      |     |     |     |       |
| DRB5*01:20                                                  | 01:20                  | HLA15021  |           | 0                                             | 0            | 4            | 0          | 1            | 0           | 1            | 6             |                                                      |     |      |      |     |     |     | WD    |
| DRB5*01:21                                                  | 01:21                  | HLA15023  |           | 0                                             | 0            | 1            | 0          | 0            | 0           | 0            | 1             |                                                      |     |      |      |     |     |     |       |
| DRB5*01:22                                                  | 01:22                  | HLA15024  |           | 0                                             | 1            | 0            | 0          | 0            | 0           | 0            | 1             |                                                      |     |      |      |     |     |     |       |
| DRB5*01:29                                                  | 01:29                  | HLA16593  |           | 0                                             | 0            | 0            | 0          | 0            | 0           | 1            | 1             |                                                      |     |      |      |     |     |     |       |
| DRB5*01:CODE <sup>d</sup>                                   | 01:CODE                |           |           | 24496                                         | 42624        | 134399       | 1918       | 31688        | 3816        | 19118        | 258059        | NA                                                   | NA  | NA   | NA   | NA  | NA  | NA  | NA    |
| <b>DRB5*02:02 total</b>                                     | <b>02:02 total</b>     |           |           | <b>1416</b>                                   | <b>936</b>   | <b>14144</b> | <b>411</b> | <b>8000</b>  | <b>638</b>  | <b>2982</b>  | <b>28527</b>  | WD                                                   | WD  | WD   | WD   | WD  | WD  | WD  | WD    |

| Supplemental Table 14: HLA-DRB5 Allele Summary <sup>a</sup> |                        |           |           | Allele Count by Population Group <sup>b</sup> |              |               |             |              |             |              |               | 3.0.0 CIWD Category by Population Group <sup>c</sup> |           |           |           |           |           |           |           |
|-------------------------------------------------------------|------------------------|-----------|-----------|-----------------------------------------------|--------------|---------------|-------------|--------------|-------------|--------------|---------------|------------------------------------------------------|-----------|-----------|-----------|-----------|-----------|-----------|-----------|
| Allele                                                      | Genomic Typing         | Allele ID | G group   | AFA                                           | API          | EURO          | MENA        | HIS          | NAM         | UNK          | Total         | AFA                                                  | API       | EURO      | MENA      | HIS       | NAM       | UNK       | Total     |
| DRB5*02:02                                                  | 02:02                  |           |           | 46                                            | 160          | 1991          | 81          | 917          | 71          | 258          | 3524          | WD                                                   | WD        | WD        | WD        | WD        | WD        | WD        | WD        |
| <b>DRB5*02:02:01G total</b>                                 | <b>02:02:01G total</b> |           |           | <b>1370</b>                                   | <b>776</b>   | <b>12153</b>  | <b>330</b>  | <b>7083</b>  | <b>567</b>  | <b>2724</b>  | <b>25003</b>  | <b>WD</b>                                            | <b>WD</b> | <b>WD</b> | <b>WD</b> | <b>WD</b> | <b>WD</b> | <b>WD</b> | <b>WD</b> |
| DRB5*02:02:01G                                              | 02:02:01G              |           | 02:02:01G | 1370                                          | 776          | 12133         | 323         | 7079         | 567         | 2721         | 24969         | WD                                                   | WD        | WD        | WD        | WD        | WD        | WD        | WD        |
| DRB5*02:02:01                                               | 02:02:01               | HLA00926  | 02:02:01G | 0                                             | 0            | 0             | 7           | 0            | 0           | 1            | 8             |                                                      |           |           | WD        |           |           |           | WD        |
| DRB5*02:06                                                  | 02:06                  | HLA08085  | 02:02:01G | 0                                             | 0            | 20            | 0           | 4            | 0           | 2            | 26            |                                                      |           | WD        |           |           |           |           | WD        |
| DRB5*02:03                                                  | 02:03                  | HLA00927  |           | 0                                             | 274          | 10            | 0           | 16           | 1           | 38           | 339           |                                                      | WD        | WD        |           | WD        |           | WD        | WD        |
| DRB5*02:04                                                  | 02:04                  | HLA00928  |           | 0                                             | 0            | 5             | 0           | 0            | 0           | 0            | 5             |                                                      |           | WD        |           |           |           |           | WD        |
| DRB5*02:08                                                  | 02:08                  | HLA15022  |           | 0                                             | 0            | 0             | 0           | 1            | 0           | 0            | 1             |                                                      |           |           |           |           |           |           |           |
| DRB5*02:12                                                  | 02:12                  | HLA15440  |           | 0                                             | 0            | 1             | 0           | 0            | 0           | 0            | 1             |                                                      |           |           |           |           |           |           |           |
| DRB5*02:13                                                  | 02:13                  | HLA15441  |           | 1                                             | 0            | 0             | 0           | 2            | 1           | 0            | 4             |                                                      |           |           |           |           |           |           |           |
| DRB5*02:CODE                                                | 02:CODE                |           |           | 4                                             | 4            | 5             | 0           | 13           | 3           | 2            | 31            | NA                                                   | NA        | NA        | NA        | NA        | NA        | NA        | NA        |
| <b>DRB5*Total <sup>e</sup></b>                              | <b>Total</b>           |           |           | <b>38061</b>                                  | <b>70970</b> | <b>254068</b> | <b>4109</b> | <b>61171</b> | <b>6359</b> | <b>43576</b> | <b>478314</b> |                                                      |           |           |           |           |           |           |           |

WD, well-documented; NA, not applicable

<sup>a</sup> All alleles observed in the current dataset are included in this table. Note that alleles are not in numerical order; alleles within a G group are clustered together. P group "two-field" total (e.g., written as "DRB5\*01:01 total") and G group total summary rows are provided. The table does not list all alleles from IPD-IMGT version 3.31.0, if not present in the study dataset.

<sup>b</sup> Population groups include: AFA (African/African American), API (Asian/Pacific Islands), EURO (European/European descent), MENA (Middle East/North Coast of Africa), HIS (South or Central America/Hispanic/Latino), NAM (Native American populations) and UNK (unknown/not asked/multiple ancestries/other). Total is the overall population i.e., all groups combined.

<sup>c</sup> Due to high submission of typing with ambiguity and uncertain denominator, only well-documented categories are assigned for this locus. Allele frequency is calculated by dividing the number of times the "allele" of interest is observed in a population by the total number of copies of all the alleles at that particular genetic locus in the population (reported as the last row in this table and also in Table 2b). The total number of copies is calculated by multiplying the number of individuals times two for all loci except DRB3/4/5. For DRB3/4/5, the number of assignments was used as the total. The CIWD status is determined based on the allele frequency. Allele frequency data will be provided on the website of the next International HLA and Immunogenetics Workshop (<https://www.ihw18.org/>).

| Supplemental Table 14: HLA-DRB5 Allele Summary <sup>a</sup> |                |           |         | Allele Count by Population Group <sup>b</sup> |     |      |      |     |     |     |       | 3.0.0 CIWD Category by Population Group <sup>c</sup> |     |      |      |     |     |     |       |
|-------------------------------------------------------------|----------------|-----------|---------|-----------------------------------------------|-----|------|------|-----|-----|-----|-------|------------------------------------------------------|-----|------|------|-----|-----|-----|-------|
| Allele                                                      | Genomic Typing | Allele ID | G group | AFA                                           | API | EURO | MENA | HIS | NAM | UNK | Total | AFA                                                  | API | EURO | MENA | HIS | NAM | UNK | Total |

<sup>d</sup> "CODE" is generically defined as a summary category of submitted HLA typing, including NMDP multiple allele codes, with ambiguities that are not within a single P or G group. "NEW" is a summary category for assignments of novel alleles that did not yet receive a nomenclature assignment. The CODE and NEW categories add to the total number of alleles but should not be assigned CIWD designations (labeled as NA, not applicable) as they do not represent a consistent allele designation (i.e., the NEW category may contain alleles with different DNA sequences that are unrelated to one another).

<sup>e</sup> DRB3\*Total is the total number of allele assignments for the population group. It is not the sum of the column as alleles are not counted more than once. For example, when evaluating frequencies at the level of G resolution, individual alleles that make up the G group (e.g., A\*80:01:01, A\*80:01:01:01, A\*80:01:01:02, A\*80:01:01G) are not included in the count because these alleles are summed up in the total G designation (e.g., "A\*80:01:01G total").
