# Supplementary material for: Common, intermediate and well‐documented HLA alleles in world populations: CIWD version 3.0.0
Source: PubMed Central journal article supplement (PMC7317522; doi:10.1111/tan.13811), 2020-01-31
Supplement: TAN-95-516-s015.pdf [file TAN-95-516-s015.pdf]

| Supplemental Table 15: HLA-DQB1 Allele Summary <sup>a</sup> |                        |           |           | Allele Count by Population Group <sup>b</sup> |               |                |              |               |              |               |                | 3.0.0 CIWD Category by Population Group <sup>c</sup> |          |          |          |          |          |          |          |                   |
|-------------------------------------------------------------|------------------------|-----------|-----------|-----------------------------------------------|---------------|----------------|--------------|---------------|--------------|---------------|----------------|------------------------------------------------------|----------|----------|----------|----------|----------|----------|----------|-------------------|
| Allele                                                      | Genomic Typing         | Allele ID | G group   | AFA                                           | API           | EURO           | MENA         | HIS           | NAM          | UNK           | Total          | AFA                                                  | API      | EURO     | MENA     | HIS      | NAM      | UNK      | Total    | Highest Frequency |
| <b>DQB1*02:01 total</b>                                     | <b>02:01 total</b>     |           |           | <b>77516</b>                                  | <b>187155</b> | <b>2372591</b> | <b>79436</b> | <b>111972</b> | <b>11248</b> | <b>233396</b> | <b>3073314</b> | <b>C</b>                                             | <b>C</b> | <b>C</b> | <b>C</b> | <b>C</b> | <b>C</b> | <b>C</b> | <b>C</b> | <b>C</b>          |
| DQB1*02:01                                                  | 02:01                  |           |           | 33                                            | 115           | 16127          | 865          | 30            | 0            | 431           | 17601          | WD                                                   | I        | C        | C        | I        |          | C        | C        | C                 |
| DQB1*02:01P                                                 | 02:01P                 |           |           | 0                                             | 0             | 23             | 5            | 0             | 0            | 11            | 39             |                                                      |          | WD       | WD       |          |          | WD       | WD       | WD                |
| <b>DQB1*02:01:01G total</b>                                 | <b>02:01:01G total</b> |           |           | <b>77356</b>                                  | <b>186678</b> | <b>2312148</b> | <b>75784</b> | <b>111784</b> | <b>11248</b> | <b>232084</b> | <b>3007082</b> | <b>C</b>                                             | <b>C</b> | <b>C</b> | <b>C</b> | <b>C</b> | <b>C</b> | <b>C</b> | <b>C</b> | <b>C</b>          |
| DQB1*02:01:01G                                              | 02:01:01G              |           | 02:01:01G | 45324                                         | 139662        | 761469         | 39924        | 67418         | 7168         | 176780        | 1237745        | C                                                    | C        | C        | C        | C        | C        | C        | C        | C                 |
| DQB1*02:01:01                                               | 02:01:01               | HLA00622  | 02:01:01G | 10988                                         | 23316         | 884329         | 20311        | 18594         | 1656         | 27862         | 987056         | C                                                    | C        | C        | C        | C        | C        | C        | C        | C                 |
| DQB1*02:01:08                                               | 02:01:08               | HLA08917  | 02:01:01G | 0                                             | 1             | 33             | 0            | 1             | 0            | 0             | 35             |                                                      |          | WD       |          |          |          |          | WD       | WD                |
| <b>DQB1*02:02 total</b>                                     | <b>02:02 total</b>     |           |           | <b>21157</b>                                  | <b>24054</b>  | <b>709845</b>  | <b>18318</b> | <b>25919</b>  | <b>2424</b>  | <b>28263</b>  | <b>829980</b>  | <b>C</b>                                             | <b>C</b> | <b>C</b> | <b>C</b> | <b>C</b> | <b>C</b> | <b>C</b> | <b>C</b> | <b>C</b>          |
| DQB1*02:02                                                  | 02:02                  |           |           | 118                                           | 356           | 44040          | 2777         | 152           | 0            | 833           | 48276          | C                                                    | C        | C        | C        | C        |          | C        | C        | C                 |
| DQB1*02:02:01                                               | 02:02:01               |           | 02:01:01G | 18740                                         | 19662         | 560702         | 12685        | 24579         | 2326         | 24321         | 663015         | C                                                    | C        | C        | C        | C        | C        | C        | C        | C                 |
| DQB1*02:02:01:01                                            | 02:02:01:01            | HLA00623  | 02:01:01G | 1969                                          | 4027          | 105029         | 2825         | 1044          | 75           | 3023          | 117992         | C                                                    | C        | C        | C        | C        | C        | C        | C        | C                 |
| DQB1*02:02:01:02                                            | 02:02:01:02            | HLA13985  | 02:01:01G | 327                                           | 2             | 69             | 31           | 144           | 23           | 85            | 681            | C                                                    |          | WD       | WD       | C        | C        | I        | I        | C                 |
| DQB1*02:02:02                                               | 02:02:02               | HLA09092  | 02:01:01G | 0                                             | 7             | 3              | 0            | 0             | 0            | 0             | 10             |                                                      | WD       |          |          |          |          |          | WD       | WD                |
| DQB1*02:02:03                                               | 02:02:03               | HLA15617  | 02:01:01G | 3                                             | 0             | 2              | 0            | 0             | 0            | 1             | 6              |                                                      |          |          |          |          |          |          | WD       | WD                |
| DQB1*02:04                                                  | 02:04                  | HLA02136  | 02:01:01G | 3                                             | 0             | 84             | 0            | 0             | 0            | 8             | 95             |                                                      |          | WD       |          |          |          | WD       | WD       | WD                |
| DQB1*02:06                                                  | 02:06                  | HLA06141  | 02:01:01G | 0                                             | 0             | 4              | 0            | 0             | 0            | 0             | 4              |                                                      |          |          |          |          |          |          |          |                   |
| DQB1*02:10                                                  | 02:10                  | HLA08924  | 02:01:01G | 0                                             | 0             | 373            | 4            | 4             | 0            | 4             | 385            |                                                      |          | I        |          |          |          |          | I        | I                 |
| DQB1*02:48                                                  | 02:48                  | HLA12476  | 02:01:01G | 0                                             | 0             | 5              | 0            | 0             | 0            | 0             | 5              |                                                      |          | WD       |          |          |          |          | WD       | WD                |
| DQB1*02:59                                                  | 02:59                  | HLA13395  | 02:01:01G | 0                                             | 0             | 40             | 1            | 0             | 0            | 0             | 41             |                                                      |          | WD       |          |          |          |          | WD       | WD                |
| DQB1*02:64                                                  | 02:64                  | HLA13936  | 02:01:01G | 1                                             | 0             | 0              | 0            | 0             | 0            | 0             | 1              |                                                      |          |          |          |          |          |          |          |                   |
| DQB1*02:80                                                  | 02:80                  | HLA16129  | 02:01:01G | 0                                             | 1             | 0              | 0            | 0             | 0            | 0             | 1              |                                                      |          |          |          |          |          |          |          |                   |
| DQB1*02:81                                                  | 02:81                  | HLA16137  | 02:01:01G | 0                                             | 0             | 3              | 0            | 0             | 0            | 0             | 3              |                                                      |          |          |          |          |          |          |          |                   |
| DQB1*02:82                                                  | 02:82                  | HLA16139  | 02:01:01G | 0                                             | 0             | 1              | 0            | 0             | 0            | 0             | 1              |                                                      |          |          |          |          |          |          |          |                   |
| DQB1*02:89                                                  | 02:89                  | HLA16643  | 02:01:01G | 1                                             | 0             | 0              | 3            | 0             | 0            | 0             | 4              |                                                      |          |          |          |          |          |          |          |                   |
| DQB1*02:98                                                  | 02:98                  | HLA17423  | 02:01:01G | 0                                             | 0             | 1              | 0            | 0             | 0            | 0             | 1              |                                                      |          |          |          |          |          |          |          |                   |
| DQB1*02:99                                                  | 02:99                  | HLA17424  | 02:01:01G | 0                                             | 0             | 1              | 0            | 0             | 0            | 0             | 1              |                                                      |          |          |          |          |          |          |          |                   |
| DQB1*02:01:02                                               | 02:01:02               | HLA01934  |           | 0                                             | 0             | 1              | 0            | 0             | 0            | 0             | 1              |                                                      |          |          |          |          |          |          |          |                   |
| DQB1*02:01:03                                               | 02:01:03               | HLA05758  |           | 0                                             | 0             | 1              | 0            | 0             | 0            | 0             | 1              |                                                      |          |          |          |          |          |          |          |                   |
| DQB1*02:01:04                                               | 02:01:04               | HLA05923  |           | 0                                             | 0             | 6              | 0            | 0             | 0            | 0             | 6              |                                                      |          | WD       |          |          |          |          | WD       | WD                |
| DQB1*02:01:05                                               | 02:01:05               | HLA08310  |           | 0                                             | 0             | 2              | 3            | 0             | 0            | 0             | 5              |                                                      |          |          |          |          |          |          | WD       | WD                |
| DQB1*02:01:06                                               | 02:01:06               | HLA08777  |           | 0                                             | 0             | 5              | 1            | 0             | 0            | 0             | 6              |                                                      |          | WD       |          |          |          |          | WD       | WD                |

| Supplemental Table 15: HLA-DQB1 Allele Summary <sup>a</sup> |                    |           | Allele Count by Population Group <sup>b</sup> |          |            |            |          |          |          |           |            | 3.0.0 CIWD Category by Population Group <sup>c</sup> |          |           |      |           |     |           |          |                   |
|-------------------------------------------------------------|--------------------|-----------|-----------------------------------------------|----------|------------|------------|----------|----------|----------|-----------|------------|------------------------------------------------------|----------|-----------|------|-----------|-----|-----------|----------|-------------------|
| Allele                                                      | Genomic Typing     | Allele ID | G group                                       | AFA      | API        | EURO       | MENA     | HIS      | NAM      | UNK       | Total      | AFA                                                  | API      | EURO      | MENA | HIS       | NAM | UNK       | Total    | Highest Frequency |
| DQB1*02:01:07                                               | 02:01:07           | HLA08915  |                                               | 0        | 6          | 0          | 0        | 0        | 0        | 1         | 7          |                                                      | WD       |           |      |           |     |           | WD       | WD                |
| DQB1*02:01:09                                               | 02:01:09           | HLA09247  |                                               | 0        | 0          | 1          | 0        | 0        | 0        | 0         | 1          |                                                      |          |           |      |           |     |           |          |                   |
| DQB1*02:01:10                                               | 02:01:10           | HLA09252  |                                               | 5        | 0          | 221        | 1        | 6        | 0        | 27        | 260        | WD                                                   |          | I         |      | WD        |     | I         | I        | I                 |
| DQB1*02:01:11                                               | 02:01:11           | HLA09254  |                                               | 3        | 0          | 0          | 0        | 0        | 0        | 0         | 3          |                                                      |          |           |      |           |     |           |          |                   |
| DQB1*02:01:12                                               | 02:01:12           | HLA09729  |                                               | 0        | 0          | 2          | 0        | 0        | 0        | 0         | 2          |                                                      |          |           |      |           |     |           |          |                   |
| DQB1*02:01:14                                               | 02:01:14           | HLA10278  |                                               | 0        | 0          | 4          | 0        | 0        | 0        | 2         | 6          |                                                      |          |           |      |           |     |           | WD       | WD                |
| DQB1*02:01:15                                               | 02:01:15           | HLA11674  |                                               | 0        | 0          | 0          | 0        | 0        | 0        | 1         | 1          |                                                      |          |           |      |           |     |           |          |                   |
| DQB1*02:01:19                                               | 02:01:19           | HLA12354  |                                               | 1        | 0          | 4          | 0        | 0        | 0        | 0         | 5          |                                                      |          |           |      |           |     |           | WD       | WD                |
| DQB1*02:01:20                                               | 02:01:20           | HLA13124  |                                               | 0        | 0          | 5          | 0        | 0        | 0        | 5         | 10         |                                                      |          | WD        |      |           |     | WD        | WD       | WD                |
| DQB1*02:01:23                                               | 02:01:23           | HLA13141  |                                               | 0        | 0          | 1          | 0        | 0        | 0        | 1         | 2          |                                                      |          |           |      |           |     |           |          |                   |
| DQB1*02:03                                                  | 02:03              | HLA00624  |                                               | 930      | 2          | 68         | 3        | 62       | 14       | 209       | 1288       | C                                                    |          | WD        |      | I         | C   | C         | I        | C                 |
| DQB1*02:05                                                  | 02:05              | HLA02890  |                                               | 0        | 0          | 58         | 0        | 0        | 1        | 7         | 66         |                                                      |          | WD        |      |           |     | WD        | WD       | WD                |
| <b>DQB1*02:07 total</b>                                     | <b>02:07 total</b> |           |                                               | <b>0</b> | <b>320</b> | <b>5</b>   | <b>0</b> | <b>0</b> | <b>4</b> | <b>8</b>  | <b>337</b> |                                                      | <b>C</b> | <b>WD</b> |      |           |     | <b>WD</b> | <b>I</b> | <b>C</b>          |
| DQB1*02:07                                                  | 02:07              |           |                                               | 0        | 84         | 2          | 0        | 0        | 4        | 3         | 93         |                                                      | I        |           |      |           |     |           | WD       | I                 |
| DQB1*02:07:01                                               | 02:07:01           | HLA08083  |                                               | 0        | 236        | 3          | 0        | 0        | 0        | 5         | 244        |                                                      | C        |           |      |           |     | WD        | I        | C                 |
| DQB1*02:12                                                  | 02:12              | HLA09127  |                                               | 0        | 2          | 36         | 14       | 0        | 0        | 6         | 58         |                                                      |          | WD        | WD   |           |     | WD        | WD       | WD                |
| DQB1*02:13                                                  | 02:13              | HLA09243  |                                               | 0        | 0          | 2          | 0        | 0        | 0        | 0         | 2          |                                                      |          |           |      |           |     |           |          |                   |
| <b>DQB1*02:14 total</b>                                     | <b>02:14 total</b> |           |                                               | <b>4</b> | <b>1</b>   | <b>197</b> | <b>1</b> | <b>6</b> | <b>1</b> | <b>23</b> | <b>233</b> |                                                      |          | <b>I</b>  |      | <b>WD</b> |     | <b>I</b>  | <b>I</b> | <b>I</b>          |
| DQB1*02:14                                                  | 02:14              |           |                                               | 1        | 0          | 87         | 1        | 2        | 1        | 12        | 104        |                                                      |          | WD        |      |           |     | WD        | WD       | WD                |
| DQB1*02:14:01                                               | 02:14:01           | HLA09245  |                                               | 3        | 1          | 105        | 0        | 4        | 0        | 10        | 123        |                                                      |          | WD        |      |           |     | WD        | WD       | WD                |
| DQB1*02:14:02                                               | 02:14:02           | HLA12353  |                                               | 0        | 0          | 5          | 0        | 0        | 0        | 1         | 6          |                                                      |          | WD        |      |           |     |           | WD       | WD                |
| DQB1*02:16                                                  | 02:16              | HLA09248  |                                               | 0        | 0          | 5          | 0        | 0        | 0        | 3         | 8          |                                                      |          | WD        |      |           |     |           | WD       | WD                |
| DQB1*02:17                                                  | 02:17              | HLA09249  |                                               | 0        | 1          | 19         | 0        | 0        | 0        | 0         | 20         |                                                      |          | WD        |      |           |     |           | WD       | WD                |
| DQB1*02:18N                                                 | 02:18N             | HLA09250  |                                               | 0        | 1          | 19         | 0        | 0        | 0        | 0         | 20         |                                                      |          | WD        |      |           |     |           | WD       | WD                |
| DQB1*02:19                                                  | 02:19              | HLA09251  |                                               | 0        | 0          | 5          | 6        | 0        | 0        | 15        | 26         |                                                      |          | WD        | WD   |           |     | I         | WD       | I                 |
| DQB1*02:20N                                                 | 02:20N             | HLA09253  |                                               | 0        | 0          | 60         | 0        | 0        | 0        | 2         | 62         |                                                      |          | WD        |      |           |     |           | WD       | WD                |
| DQB1*02:21                                                  | 02:21              | HLA09255  |                                               | 0        | 0          | 10         | 0        | 0        | 0        | 0         | 10         |                                                      |          | WD        |      |           |     |           | WD       | WD                |
| DQB1*02:22                                                  | 02:22              | HLA09256  |                                               | 0        | 0          | 3          | 0        | 0        | 0        | 0         | 3          |                                                      |          |           |      |           |     |           |          |                   |
| DQB1*02:23                                                  | 02:23              | HLA09257  |                                               | 0        | 0          | 20         | 0        | 0        | 0        | 0         | 20         |                                                      |          | WD        |      |           |     |           | WD       | WD                |
| DQB1*02:24                                                  | 02:24              | HLA09258  |                                               | 0        | 1          | 9          | 0        | 0        | 0        | 0         | 10         |                                                      |          | WD        |      |           |     |           | WD       | WD                |
| DQB1*02:26                                                  | 02:26              | HLA09260  |                                               | 3        | 0          | 99         | 0        | 2        | 0        | 24        | 128        |                                                      |          | WD        |      |           |     | I         | WD       | I                 |

| Supplemental Table 15: HLA-DQB1 Allele Summary <sup>a</sup> |                    |           | Allele Count by Population Group <sup>b</sup> |              |               |                |              |               |              |               |                | 3.0.0 CIWD Category by Population Group <sup>c</sup> |          |          |          |          |          |          |          |                   |
|-------------------------------------------------------------|--------------------|-----------|-----------------------------------------------|--------------|---------------|----------------|--------------|---------------|--------------|---------------|----------------|------------------------------------------------------|----------|----------|----------|----------|----------|----------|----------|-------------------|
| Allele                                                      | Genomic Typing     | Allele ID | G group                                       | AFA          | API           | EURO           | MENA         | HIS           | NAM          | UNK           | Total          | AFA                                                  | API      | EURO     | MENA     | HIS      | NAM      | UNK      | Total    | Highest Frequency |
| DQB1*02:27                                                  | 02:27              | HLA09344  |                                               | 0            | 0             | 25             | 0            | 0             | 0            | 0             | 25             |                                                      |          | WD       |          |          |          |          | WD       | WD                |
| DQB1*02:28                                                  | 02:28              | HLA09355  |                                               | 0            | 0             | 9              | 0            | 1             | 0            | 2             | 12             |                                                      |          | WD       |          |          |          |          | WD       | WD                |
| DQB1*02:29                                                  | 02:29              | HLA09357  |                                               | 0            | 0             | 54             | 0            | 1             | 0            | 9             | 64             |                                                      |          | WD       |          |          |          | WD       | WD       | WD                |
| DQB1*02:30                                                  | 02:30              | HLA09641  |                                               | 0            | 0             | 17             | 0            | 0             | 0            | 0             | 17             |                                                      |          | WD       |          |          |          |          | WD       | WD                |
| DQB1*02:31                                                  | 02:31              | HLA09642  |                                               | 0            | 0             | 3              | 0            | 0             | 0            | 0             | 3              |                                                      |          |          |          |          |          |          |          |                   |
| DQB1*02:33                                                  | 02:33              | HLA09742  |                                               | 0            | 0             | 5              | 0            | 0             | 0            | 0             | 5              |                                                      |          | WD       |          |          |          |          | WD       | WD                |
| DQB1*02:34                                                  | 02:34              | HLA10279  |                                               | 0            | 0             | 4              | 0            | 0             | 0            | 0             | 4              |                                                      |          |          |          |          |          |          |          |                   |
| DQB1*02:37                                                  | 02:37              | HLA11133  |                                               | 0            | 0             | 1              | 0            | 0             | 0            | 0             | 1              |                                                      |          |          |          |          |          |          |          |                   |
| DQB1*02:40                                                  | 02:40              | HLA11675  |                                               | 0            | 0             | 1              | 0            | 0             | 0            | 0             | 1              |                                                      |          |          |          |          |          |          |          |                   |
| DQB1*02:41                                                  | 02:41              | HLA11883  |                                               | 0            | 0             | 1              | 0            | 0             | 0            | 0             | 1              |                                                      |          |          |          |          |          |          |          |                   |
| DQB1*02:42                                                  | 02:42              | HLA12208  |                                               | 0            | 1             | 0              | 0            | 0             | 0            | 1             | 2              |                                                      |          |          |          |          |          |          |          |                   |
| DQB1*02:45                                                  | 02:45              | HLA12523  |                                               | 0            | 0             | 0              | 0            | 0             | 0            | 1             | 1              |                                                      |          |          |          |          |          |          |          |                   |
| DQB1*02:46                                                  | 02:46              | HLA12524  |                                               | 0            | 0             | 6              | 0            | 0             | 0            | 0             | 6              |                                                      |          | WD       |          |          |          |          | WD       | WD                |
| DQB1*02:51                                                  | 02:51              | HLA12798  |                                               | 0            | 3             | 0              | 0            | 0             | 0            | 0             | 3              |                                                      |          |          |          |          |          |          |          |                   |
| DQB1*02:53Q                                                 | 02:53Q             | HLA12878  |                                               | 0            | 0             | 165            | 0            | 0             | 0            | 0             | 165            |                                                      |          | I        |          |          |          |          | I        | I                 |
| DQB1*02:54                                                  | 02:54              | HLA13125  |                                               | 0            | 0             | 1              | 1            | 1             | 0            | 0             | 3              |                                                      |          |          |          |          |          |          |          |                   |
| DQB1*02:56                                                  | 02:56              | HLA13129  |                                               | 1            | 0             | 0              | 0            | 0             | 0            | 0             | 1              |                                                      |          |          |          |          |          |          |          |                   |
| DQB1*02:58N                                                 | 02:58N             | HLA13205  |                                               | 0            | 0             | 2              | 0            | 0             | 0            | 0             | 2              |                                                      |          |          |          |          |          |          |          |                   |
| DQB1*02:61                                                  | 02:61              | HLA13681  |                                               | 0            | 0             | 1              | 0            | 0             | 0            | 0             | 1              |                                                      |          |          |          |          |          |          |          |                   |
| DQB1*02:62                                                  | 02:62              | HLA13918  |                                               | 0            | 0             | 1              | 0            | 0             | 0            | 0             | 1              |                                                      |          |          |          |          |          |          |          |                   |
| DQB1*02:63                                                  | 02:63              | HLA13925  |                                               | 0            | 0             | 9              | 0            | 0             | 0            | 0             | 9              |                                                      |          | WD       |          |          |          |          | WD       | WD                |
| DQB1*02:65                                                  | 02:65              | HLA14230  |                                               | 0            | 0             | 0              | 0            | 0             | 0            | 1             | 1              |                                                      |          |          |          |          |          |          |          |                   |
| DQB1*02:74                                                  | 02:74              | HLA15322  |                                               | 0            | 0             | 0              | 1            | 0             | 0            | 0             | 1              |                                                      |          |          |          |          |          |          |          |                   |
| DQB1*02:78                                                  | 02:78              | HLA15993  |                                               | 0            | 1             | 0              | 0            | 0             | 0            | 0             | 1              |                                                      |          |          |          |          |          |          |          |                   |
| DQB1*02:84                                                  | 02:84              | HLA16187  |                                               | 0            | 0             | 1              | 0            | 0             | 0            | 0             | 1              |                                                      |          |          |          |          |          |          |          |                   |
| DQB1*02:85                                                  | 02:85              | HLA16322  |                                               | 0            | 0             | 1              | 0            | 0             | 0            | 0             | 1              |                                                      |          |          |          |          |          |          |          |                   |
| DQB1*02:95                                                  | 02:95              | HLA17166  |                                               | 0            | 0             | 1              | 0            | 0             | 0            | 0             | 1              |                                                      |          |          |          |          |          |          |          |                   |
| DQB1*02:CODE <sup>d</sup>                                   | 02:CODE            |           |                                               | 2974         | 2011          | 37591          | 212          | 3808          | 232          | 5636          | 52464          | NA                                                   | NA       | NA       | NA       | NA       | NA       | NA       | NA       | NA                |
| <b>DQB1*03:01 total</b>                                     | <b>03:01 total</b> |           |                                               | <b>64549</b> | <b>190390</b> | <b>2327114</b> | <b>98892</b> | <b>131200</b> | <b>12881</b> | <b>245316</b> | <b>3070342</b> | <b>C</b>                                             | <b>C</b> | <b>C</b> | <b>C</b> | <b>C</b> | <b>C</b> | <b>C</b> | <b>C</b> | <b>C</b>          |
| DQB1*03:01                                                  | 03:01              |           |                                               | 84           | 524           | 64809          | 6324         | 178           | 0            | 1677          | 73596          | C                                                    | C        | C        | C        | C        |          | C        | C        | C                 |
| DQB1*03:01P                                                 | 03:01P             |           |                                               | 0            | 1             | 808            | 4            | 4             | 0            | 26            | 843            |                                                      |          | I        |          |          |          | I        | I        | I                 |

| Supplemental Table 15: HLA-DQB1 Allele Summary <sup>a</sup> |                        |           | Allele Count by Population Group <sup>b</sup> |              |               |                |              |               |              |               |                | 3.0.0 CIWD Category by Population Group <sup>c</sup> |          |          |          |          |          |          |          |                   |
|-------------------------------------------------------------|------------------------|-----------|-----------------------------------------------|--------------|---------------|----------------|--------------|---------------|--------------|---------------|----------------|------------------------------------------------------|----------|----------|----------|----------|----------|----------|----------|-------------------|
| Allele                                                      | Genomic Typing         | Allele ID | G group                                       | AFA          | API           | EURO           | MENA         | HIS           | NAM          | UNK           | Total          | AFA                                                  | API      | EURO     | MENA     | HIS      | NAM      | UNK      | Total    | Highest Frequency |
| <b>DQB1*03:01:01G total</b>                                 | <b>03:01:01G total</b> |           |                                               | <b>56001</b> | <b>189759</b> | <b>2249467</b> | <b>92227</b> | <b>128466</b> | <b>12536</b> | <b>240871</b> | <b>2969327</b> | <b>C</b>                                             | <b>C</b> | <b>C</b> | <b>C</b> | <b>C</b> | <b>C</b> | <b>C</b> | <b>C</b> | <b>C</b>          |
| DQB1*03:01:01G                                              | 03:01:01G              |           | 03:01:01G                                     | 37349        | 137508        | 721566         | 32101        | 78398         | 8252         | 189731        | 1204905        | C                                                    | C        | C        | C        | C        | C        | C        | C        | C                 |
| DQB1*03:01:01                                               | 03:01:01               |           | 03:01:01G                                     | 11574        | 51376         | 1512406        | 59737        | 44743         | 3707         | 47681         | 1731224        | C                                                    | C        | C        | C        | C        | C        | C        | C        | C                 |
| DQB1*03:01:01:01                                            | 03:01:01:01            | HLA00625  | 03:01:01G                                     | 258          | 775           | 7288           | 36           | 2998          | 264          | 1201          | 12820          | C                                                    | C        | C        | WD       | C        | C        | C        | C        | C                 |
| DQB1*03:01:01:02                                            | 03:01:01:02            | HLA06613  | 03:01:01G                                     | 0            | 0             | 30             | 0            | 0             | 0            | 0             | 30             |                                                      |          | WD       |          |          |          |          | WD       | WD                |
| DQB1*03:01:01:03                                            | 03:01:01:03            | HLA06616  | 03:01:01G                                     | 0            | 1             | 306            | 0            | 0             | 0            | 7             | 314            |                                                      |          | I        |          |          |          | WD       | I        | I                 |
| DQB1*03:01:01:04                                            | 03:01:01:04            | HLA15506  | 03:01:01G                                     | 1            | 2             | 2              | 0            | 0             | 0            | 0             | 5              |                                                      |          |          |          |          |          |          | WD       | WD                |
| DQB1*03:01:01:05                                            | 03:01:01:05            | HLA15507  | 03:01:01G                                     | 17           | 6             | 378            | 2            | 53            | 3            | 40            | 499            | WD                                                   | WD       | I        |          | I        |          | I        | I        | I                 |
| DQB1*03:01:04                                               | 03:01:04               | HLA03175  | 03:01:01G                                     | 1809         | 11            | 1786           | 168          | 433           | 64           | 536           | 4807           | C                                                    | WD       | C        | C        | C        | C        | C        | C        | C                 |
| DQB1*03:01:05                                               | 03:01:05               | HLA05773  | 03:01:01G                                     | 0            | 2             | 2              | 0            | 0             | 0            | 0             | 4              |                                                      |          |          |          |          |          |          |          |                   |
| DQB1*03:01:09                                               | 03:01:09               | HLA09147  | 03:01:01G                                     | 0            | 0             | 141            | 1            | 2             | 0            | 0             | 144            |                                                      |          | I        |          |          |          |          | WD       | I                 |
| DQB1*03:01:11                                               | 03:01:11               | HLA09149  | 03:01:01G                                     | 0            | 2             | 3              | 0            | 0             | 0            | 0             | 5              |                                                      |          |          |          |          |          |          | WD       | WD                |
| DQB1*03:01:26                                               | 03:01:26               | HLA12737  | 03:01:01G                                     | 0            | 1             | 3              | 2            | 2             | 1            | 1             | 10             |                                                      |          |          |          |          |          |          | WD       | WD                |
| DQB1*03:01:31                                               | 03:01:31               | HLA13926  | 03:01:01G                                     | 0            | 0             | 8              | 0            | 0             | 0            | 0             | 8              |                                                      |          | WD       |          |          |          |          | WD       | WD                |
| DQB1*03:01:35                                               | 03:01:35               | HLA16125  | 03:01:01G                                     | 0            | 0             | 1              | 0            | 0             | 0            | 0             | 1              |                                                      |          |          |          |          |          |          |          |                   |
| DQB1*03:09                                                  | 03:09                  | HLA00635  | 03:01:01G                                     | 195          | 2             | 142            | 26           | 56            | 8            | 67            | 496            | C                                                    |          | I        | WD       | I        | C        | I        | I        | C                 |
| <b>DQB1*03:19 total</b>                                     | <b>03:19 total</b>     |           |                                               | <b>13228</b> | <b>125</b>    | <b>16143</b>   | <b>434</b>   | <b>4169</b>   | <b>556</b>   | <b>4209</b>   | <b>38864</b>   | <b>C</b>                                             | <b>I</b> | <b>C</b> | <b>C</b> | <b>C</b> | <b>C</b> | <b>C</b> | <b>C</b> | <b>C</b>          |
| DQB1*03:19                                                  | 03:19                  |           | 03:01:01G                                     | 8450         | 81            | 11077          | 293          | 2540          | 345          | 2645          | 25431          | C                                                    | I        | C        | C        | C        | C        | C        | C        | C                 |
| DQB1*03:19:01                                               | 03:19:01               | HLA02690  | 03:01:01G                                     | 4778         | 44            | 5066           | 141          | 1629          | 211          | 1564          | 13433          | C                                                    | I        | C        | C        | C        | C        | C        | C        | C                 |
| DQB1*03:21                                                  | 03:21                  | HLA03174  | 03:01:01G                                     | 1            | 3             | 68             | 0            | 57            | 4            | 14            | 147            |                                                      |          | WD       |          | I        |          | I        | WD       | I                 |
| DQB1*03:22                                                  | 03:22                  | HLA03295  | 03:01:01G                                     | 0            | 0             | 88             | 1            | 0             | 0            | 2             | 91             |                                                      |          | WD       |          |          |          |          | WD       | WD                |
| DQB1*03:24                                                  | 03:24                  | HLA03596  | 03:01:01G                                     | 0            | 2             | 6              | 0            | 0             | 0            | 1             | 9              |                                                      |          | WD       |          |          |          |          | WD       | WD                |
| DQB1*03:29                                                  | 03:29                  | HLA05771  | 03:01:01G                                     | 0            | 21            | 11             | 6            | 1             | 0            | 3             | 42             |                                                      | I        | WD       | WD       |          |          |          | WD       | I                 |
| DQB1*03:35                                                  | 03:35                  | HLA06176  | 03:01:01G                                     | 0            | 1             | 0              | 0            | 0             | 0            | 0             | 1              |                                                      |          |          |          |          |          |          |          |                   |
| DQB1*03:42                                                  | 03:42                  | HLA08113  | 03:01:01G                                     | 3            | 0             | 30             | 0            | 86            | 18           | 13            | 150            |                                                      |          | WD       |          | C        | C        | I        | WD       | C                 |
| DQB1*03:49                                                  | 03:49                  | HLA09143  | 03:01:01G                                     | 2            | 0             | 13             | 1            | 0             | 0            | 0             | 16             |                                                      |          | WD       |          |          |          |          | WD       | WD                |
| DQB1*03:50                                                  | 03:50                  | HLA09144  | 03:01:01G                                     | 0            | 1             | 0              | 0            | 0             | 0            | 0             | 1              |                                                      |          |          |          |          |          |          |          |                   |
| DQB1*03:94                                                  | 03:94                  | HLA10214  | 03:01:01G                                     | 0            | 1             | 0              | 0            | 0             | 0            | 0             | 1              |                                                      |          |          |          |          |          |          |          |                   |
| DQB1*03:115                                                 | 03:115                 | HLA11056  | 03:01:01G                                     | 0            | 0             | 24             | 0            | 0             | 4            | 4             | 32             |                                                      |          | WD       |          |          |          |          | WD       | WD                |
| DQB1*03:116                                                 | 03:116                 | HLA11078  | 03:01:01G                                     | 0            | 0             | 2              | 0            | 0             | 0            | 0             | 2              |                                                      |          |          |          |          |          |          |          |                   |
| DQB1*03:165                                                 | 03:165                 | HLA12574  | 03:01:01G                                     | 1            | 0             | 0              | 0            | 0             | 0            | 0             | 1              |                                                      |          |          |          |          |          |          |          |                   |

| Supplemental Table 15: HLA-DQB1 Allele Summary <sup>a</sup> |                        |           | Allele Count by Population Group <sup>b</sup> |              |               |                |              |               |              |               |                |          | 3.0.0 CIWD Category by Population Group <sup>c</sup> |          |          |          |          |          |          |                   |
|-------------------------------------------------------------|------------------------|-----------|-----------------------------------------------|--------------|---------------|----------------|--------------|---------------|--------------|---------------|----------------|----------|------------------------------------------------------|----------|----------|----------|----------|----------|----------|-------------------|
| Allele                                                      | Genomic Typing         | Allele ID | G group                                       | AFA          | API           | EURO           | MENA         | HIS           | NAM          | UNK           | Total          | AFA      | API                                                  | EURO     | MENA     | HIS      | NAM      | UNK      | Total    | Highest Frequency |
| DQB1*03:169                                                 | 03:169                 | HLA13051  | 03:01:01G                                     | 0            | 0             | 2              | 0            | 0             | 0            | 1             | 3              |          |                                                      |          |          |          |          |          |          |                   |
| DQB1*03:182                                                 | 03:182                 | HLA13386  | 03:01:01G                                     | 0            | 0             | 1              | 0            | 0             | 0            | 1             | 2              |          |                                                      |          |          |          |          |          |          |                   |
| DQB1*03:191                                                 | 03:191                 | HLA13711  | 03:01:01G                                     | 0            | 0             | 67             | 0            | 2             | 0            | 0             | 69             |          |                                                      | WD       |          |          |          |          | WD       | WD                |
| DQB1*03:196                                                 | 03:196                 | HLA13929  | 03:01:01G                                     | 1            | 0             | 17             | 0            | 0             | 0            | 1             | 19             |          |                                                      | WD       |          |          |          |          | WD       | WD                |
| DQB1*03:198                                                 | 03:198                 | HLA13931  | 03:01:01G                                     | 0            | 0             | 0              | 5            | 0             | 0            | 0             | 5              |          |                                                      |          | WD       |          |          |          | WD       | WD                |
| DQB1*03:241                                                 | 03:241                 | HLA15598  | 03:01:01G                                     | 0            | 0             | 2              | 0            | 0             | 0            | 0             | 2              |          |                                                      |          |          |          |          |          |          |                   |
| DQB1*03:243                                                 | 03:243                 | HLA15585  | 03:01:01G                                     | 12           | 0             | 1              | 0            | 4             | 0            | 3             | 20             | WD       |                                                      |          |          |          |          |          | WD       | WD                |
| DQB1*03:246                                                 | 03:246                 | HLA16128  | 03:01:01G                                     | 0            | 0             | 1              | 0            | 0             | 0            | 0             | 1              |          |                                                      |          |          |          |          |          |          |                   |
| DQB1*03:253                                                 | 03:253                 | HLA16163  | 03:01:01G                                     | 0            | 0             | 6              | 0            | 2             | 0            | 0             | 8              |          |                                                      | WD       |          |          |          |          | WD       | WD                |
| DQB1*03:01:02                                               | 03:01:02               | HLA00626  |                                               | 0            | 2             | 57             | 32           | 1             | 0            | 1             | 93             |          |                                                      | WD       | WD       |          |          |          | WD       | WD                |
| DQB1*03:01:03                                               | 03:01:03               | HLA02688  |                                               | 7            | 3             | 792            | 2            | 10            | 0            | 65            | 879            | WD       |                                                      | I        |          | I        |          | I        | I        | I                 |
| DQB1*03:01:06                                               | 03:01:06               | HLA06142  |                                               | 0            | 1             | 0              | 0            | 0             | 0            | 0             | 1              |          |                                                      |          |          |          |          |          |          |                   |
| DQB1*03:01:07                                               | 03:01:07               | HLA09094  |                                               | 1            | 0             | 1              | 0            | 0             | 0            | 0             | 2              |          |                                                      |          |          |          |          |          |          |                   |
| DQB1*03:01:08                                               | 03:01:08               | HLA09096  |                                               | 5            | 15            | 16             | 0            | 1             | 0            | 4             | 41             | WD       | I                                                    | WD       |          |          |          |          | WD       | I                 |
| DQB1*03:01:13                                               | 03:01:13               | HLA09233  |                                               | 0            | 0             | 6              | 0            | 0             | 0            | 1             | 7              |          |                                                      | WD       |          |          |          |          | WD       | WD                |
| DQB1*03:01:14                                               | 03:01:14               | HLA09235  |                                               | 1            | 1             | 53             | 0            | 0             | 0            | 15            | 70             |          |                                                      | WD       |          |          |          | I        | WD       | I                 |
| DQB1*03:01:15                                               | 03:01:15               | HLA09239  |                                               | 0            | 0             | 1              | 0            | 0             | 0            | 0             | 1              |          |                                                      |          |          |          |          |          |          |                   |
| DQB1*03:01:16                                               | 03:01:16               | HLA09242  |                                               | 0            | 0             | 1              | 0            | 0             | 0            | 0             | 1              |          |                                                      |          |          |          |          |          |          |                   |
| DQB1*03:01:17                                               | 03:01:17               | HLA09634  |                                               | 0            | 0             | 3              | 1            | 0             | 0            | 0             | 4              |          |                                                      |          |          |          |          |          |          |                   |
| DQB1*03:01:18                                               | 03:01:18               | HLA09639  |                                               | 0            | 0             | 0              | 0            | 0             | 0            | 4             | 4              |          |                                                      |          |          |          |          |          |          |                   |
| DQB1*03:01:22                                               | 03:01:22               | HLA10540  |                                               | 0            | 0             | 19             | 4            | 0             | 0            | 5             | 28             |          |                                                      | WD       |          |          |          | WD       | WD       | WD                |
| DQB1*03:01:27                                               | 03:01:27               | HLA12794  |                                               | 0            | 0             | 0              | 5            | 0             | 0            | 1             | 6              |          |                                                      |          | WD       |          |          |          | WD       | WD                |
| DQB1*03:01:28                                               | 03:01:28               | HLA12796  |                                               | 0            | 0             | 1              | 0            | 0             | 0            | 1             | 2              |          |                                                      |          |          |          |          |          |          |                   |
| DQB1*03:01:29                                               | 03:01:29               | HLA13122  |                                               | 0            | 0             | 1              | 0            | 0             | 0            | 0             | 1              |          |                                                      |          |          |          |          |          |          |                   |
| DQB1*03:01:30                                               | 03:01:30               | HLA13622  |                                               | 0            | 3             | 2              | 0            | 0             | 0            | 0             | 5              |          |                                                      |          |          |          |          |          | WD       | WD                |
| <b>DQB1*03:02 total</b>                                     | <b>03:02 total</b>     |           |                                               | <b>14783</b> | <b>110398</b> | <b>1073164</b> | <b>43586</b> | <b>121773</b> | <b>10923</b> | <b>134786</b> | <b>1509413</b> | <b>C</b> | <b>C</b>                                             | <b>C</b> | <b>C</b> | <b>C</b> | <b>C</b> | <b>C</b> | <b>C</b> | <b>C</b>          |
| DQB1*03:02                                                  | 03:02                  |           |                                               | 12           | 108           | 15972          | 1343         | 95            | 6            | 494           | 18030          | WD       | I                                                    | C        | C        | C        | WD       | C        | C        | C                 |
| DQB1*03:02P                                                 | 03:02P                 |           |                                               | 0            | 0             | 7              | 2            | 0             | 0            | 4             | 13             |          |                                                      | WD       |          |          |          |          | WD       | WD                |
| <b>DQB1*03:02:01G total</b>                                 | <b>03:02:01G total</b> |           |                                               | <b>14734</b> | <b>110234</b> | <b>1052556</b> | <b>42214</b> | <b>121485</b> | <b>10888</b> | <b>133871</b> | <b>1485982</b> | <b>C</b> | <b>C</b>                                             | <b>C</b> | <b>C</b> | <b>C</b> | <b>C</b> | <b>C</b> | <b>C</b> | <b>C</b>          |
| DQB1*03:02:01G                                              | 03:02:01G              |           | 03:02:01G                                     | 8226         | 82111         | 310200         | 16736        | 71932         | 6889         | 103554        | 599648         | C        | C                                                    | C        | C        | C        | C        | C        | C        | C                 |
| DQB1*03:02:01                                               | 03:02:01               |           | 03:02:01G                                     | 6508         | 28123         | 742176         | 25418        | 49551         | 3999         | 30309         | 886084         | C        | C                                                    | C        | C        | C        | C        | C        | C        | C                 |

| Supplemental Table 15: HLA-DQB1 Allele Summary <sup>a</sup> |                        |           | Allele Count by Population Group <sup>b</sup> |             |               |               |             |              |             |              |               | 3.0.0 CIWD Category by Population Group <sup>c</sup> |          |          |          |          |          |          |          |                   |
|-------------------------------------------------------------|------------------------|-----------|-----------------------------------------------|-------------|---------------|---------------|-------------|--------------|-------------|--------------|---------------|------------------------------------------------------|----------|----------|----------|----------|----------|----------|----------|-------------------|
| Allele                                                      | Genomic Typing         | Allele ID | G group                                       | AFA         | API           | EURO          | MENA        | HIS          | NAM         | UNK          | Total         | AFA                                                  | API      | EURO     | MENA     | HIS      | NAM      | UNK      | Total    | Highest Frequency |
| DQB1*03:02:01:01                                            | 03:02:01:01            | HLA00627  | 03:02:01G                                     | 0           | 0             | 118           | 53          | 0            | 0           | 2            | 173           |                                                      |          | I        | C        |          |          |          | I        | C                 |
| DQB1*03:02:01:02                                            | 03:02:01:02            | HLA15503  | 03:02:01G                                     | 0           | 0             | 18            | 0           | 0            | 0           | 0            | 18            |                                                      |          | WD       |          |          |          |          | WD       | WD                |
| DQB1*03:02:09                                               | 03:02:09               | HLA09846  | 03:02:01G                                     | 0           | 0             | 11            | 0           | 0            | 0           | 0            | 11            |                                                      |          | WD       |          |          |          |          | WD       | WD                |
| DQB1*03:02:12                                               | 03:02:12               | HLA10217  | 03:02:01G                                     | 0           | 0             | 8             | 0           | 0            | 0           | 3            | 11            |                                                      |          | WD       |          |          |          |          | WD       | WD                |
| DQB1*03:02:21                                               | 03:02:21               | HLA16146  | 03:02:01G                                     | 0           | 0             | 12            | 0           | 0            | 0           | 0            | 12            |                                                      |          | WD       |          |          |          |          | WD       | WD                |
| DQB1*03:02:24                                               | 03:02:24               | HLA16158  | 03:02:01G                                     | 0           | 0             | 1             | 0           | 0            | 0           | 0            | 1             |                                                      |          |          |          |          |          |          |          |                   |
| DQB1*03:02:25                                               | 03:02:25               | HLA17347  | 03:02:01G                                     | 0           | 0             | 0             | 0           | 0            | 0           | 1            | 1             |                                                      |          |          |          |          |          |          |          |                   |
| DQB1*03:32                                                  | 03:32                  | HLA06143  | 03:02:01G                                     | 0           | 0             | 1             | 0           | 0            | 0           | 0            | 1             |                                                      |          |          |          |          |          |          |          |                   |
| DQB1*03:190                                                 | 03:190                 | HLA13708  | 03:02:01G                                     | 0           | 0             | 0             | 7           | 2            | 0           | 0            | 9             |                                                      |          |          | WD       |          |          |          | WD       | WD                |
| DQB1*03:247                                                 | 03:247                 | HLA16130  | 03:02:01G                                     | 0           | 0             | 8             | 0           | 0            | 0           | 1            | 9             |                                                      |          | WD       |          |          |          |          | WD       | WD                |
| DQB1*03:251                                                 | 03:251                 | HLA16143  | 03:02:01G                                     | 0           | 0             | 2             | 0           | 0            | 0           | 0            | 2             |                                                      |          |          |          |          |          |          |          |                   |
| DQB1*03:263                                                 | 03:263                 | HLA17064  | 03:02:01G                                     | 0           | 0             | 1             | 0           | 0            | 0           | 1            | 2             |                                                      |          |          |          |          |          |          |          |                   |
| DQB1*03:02:02                                               | 03:02:02               | HLA01770  |                                               | 23          | 15            | 4502          | 17          | 130          | 16          | 364          | 5067          | WD                                                   | I        | C        | WD       | C        | C        | C        | C        | C                 |
| DQB1*03:02:03                                               | 03:02:03               | HLA02625  |                                               | 14          | 1             | 78            | 10          | 61           | 11          | 26           | 201           | WD                                                   |          | WD       | WD       | I        | C        | I        | I        | C                 |
| DQB1*03:02:06                                               | 03:02:06               | HLA09285  |                                               | 0           | 38            | 22            | 0           | 0            | 0           | 27           | 87            |                                                      | I        | WD       |          |          |          | I        | WD       | I                 |
| DQB1*03:02:07                                               | 03:02:07               | HLA09288  |                                               | 0           | 0             | 2             | 0           | 1            | 1           | 0            | 4             |                                                      |          |          |          |          |          |          |          |                   |
| DQB1*03:02:08                                               | 03:02:08               | HLA09741  |                                               | 0           | 2             | 1             | 0           | 0            | 0           | 0            | 3             |                                                      |          |          |          |          |          |          |          |                   |
| DQB1*03:02:10                                               | 03:02:10               | HLA10030  |                                               | 0           | 0             | 6             | 0           | 0            | 0           | 0            | 6             |                                                      |          | WD       |          |          |          |          | WD       | WD                |
| DQB1*03:02:11                                               | 03:02:11               | HLA10216  |                                               | 0           | 0             | 3             | 0           | 0            | 0           | 0            | 3             |                                                      |          |          |          |          |          |          |          |                   |
| DQB1*03:02:13                                               | 03:02:13               | HLA10283  |                                               | 0           | 0             | 6             | 0           | 0            | 0           | 0            | 6             |                                                      |          | WD       |          |          |          |          | WD       | WD                |
| DQB1*03:02:14                                               | 03:02:14               | HLA11282  |                                               | 0           | 0             | 1             | 0           | 0            | 1           | 0            | 2             |                                                      |          |          |          |          |          |          |          |                   |
| DQB1*03:02:15                                               | 03:02:15               | HLA11887  |                                               | 0           | 0             | 0             | 0           | 1            | 0           | 0            | 1             |                                                      |          |          |          |          |          |          |          |                   |
| DQB1*03:02:17                                               | 03:02:17               | HLA12035  |                                               | 0           | 0             | 3             | 0           | 0            | 0           | 0            | 3             |                                                      |          |          |          |          |          |          |          |                   |
| DQB1*03:02:18                                               | 03:02:18               | HLA13138  |                                               | 0           | 0             | 4             | 0           | 0            | 0           | 0            | 4             |                                                      |          |          |          |          |          |          |          |                   |
| DQB1*03:02:19                                               | 03:02:19               | HLA13140  |                                               | 0           | 0             | 1             | 0           | 0            | 0           | 0            | 1             |                                                      |          |          |          |          |          |          |          |                   |
| <b>DQB1*03:03 total</b>                                     | <b>03:03 total</b>     |           |                                               | <b>5478</b> | <b>112706</b> | <b>513124</b> | <b>9275</b> | <b>15819</b> | <b>1841</b> | <b>47409</b> | <b>705652</b> | <b>C</b>                                             | <b>C</b> | <b>C</b> | <b>C</b> | <b>C</b> | <b>C</b> | <b>C</b> | <b>C</b> | <b>C</b>          |
| DQB1*03:03                                                  | 03:03                  |           |                                               | 18          | 162           | 14513         | 579         | 35           | 0           | 254          | 15561         | WD                                                   | C        | C        | C        | I        |          | C        | C        | C                 |
| DQB1*03:03P                                                 | 03:03P                 |           |                                               | 0           | 0             | 7             | 0           | 0            | 0           | 0            | 7             |                                                      |          | WD       |          |          |          |          | WD       | WD                |
| <b>DQB1*03:03:02G total</b>                                 | <b>03:03:02G total</b> |           |                                               | <b>5458</b> | <b>112538</b> | <b>497765</b> | <b>8695</b> | <b>15771</b> | <b>1837</b> | <b>47124</b> | <b>689188</b> | <b>C</b>                                             | <b>C</b> | <b>C</b> | <b>C</b> | <b>C</b> | <b>C</b> | <b>C</b> | <b>C</b> | <b>C</b>          |
| DQB1*03:03:02G                                              | 03:03:02G              |           | 03:03:02G                                     | 2972        | 81829         | 133514        | 3032        | 9685         | 1156        | 33425        | 265613        | C                                                    | C        | C        | C        | C        | C        | C        | C        | C                 |
| DQB1*03:03:02                                               | 03:03:02               |           | 03:03:02G                                     | 2171        | 29599         | 358710        | 5535        | 5162         | 583         | 12861        | 414621        | C                                                    | C        | C        | C        | C        | C        | C        | C        | C                 |

| Supplemental Table 15: HLA-DQB1 Allele Summary <sup>a</sup> |                        |           | Allele Count by Population Group <sup>b</sup> |            |             |              |             |             |            |             |              | 3.0.0 CIWD Category by Population Group <sup>c</sup> |          |          |          |          |          |          |          |                   |          |
|-------------------------------------------------------------|------------------------|-----------|-----------------------------------------------|------------|-------------|--------------|-------------|-------------|------------|-------------|--------------|------------------------------------------------------|----------|----------|----------|----------|----------|----------|----------|-------------------|----------|
| Allele                                                      | Genomic Typing         | Allele ID | G group                                       | AFA        | API         | EURO         | MENA        | HIS         | NAM        | UNK         | Total        | AFA                                                  | API      | EURO     | MENA     | HIS      | NAM      | UNK      | Total    | Highest Frequency |          |
| DQB1*03:03:02:01                                            | 03:03:02:01            | HLA00629  | 03:03:02G                                     | 310        | 1056        | 5381         | 82          | 811         | 80         | 811         | 8531         | C                                                    | C        | C        | C        | C        | C        | C        | C        | C                 | C        |
| DQB1*03:03:02:02                                            | 03:03:02:02            | HLA06620  | 03:03:02G                                     | 0          | 0           | 5            | 2           | 0           | 0          | 1           | 8            |                                                      |          | WD       |          |          |          |          | WD       | WD                |          |
| DQB1*03:03:02:04                                            | 03:03:02:04            | HLA12588  | 03:03:02G                                     | 4          | 4           | 2            | 0           | 113         | 18         | 20          | 161          |                                                      |          |          |          | C        | C        | I        | I        | C                 |          |
| DQB1*03:03:04                                               | 03:03:04               | HLA06822  | 03:03:02G                                     | 1          | 45          | 109          | 44          | 0           | 0          | 3           | 202          |                                                      | I        | WD       | C        |          |          |          | I        | C                 |          |
| DQB1*03:03:09                                               | 03:03:09               | HLA10223  | 03:03:02G                                     | 0          | 0           | 1            | 0           | 0           | 0          | 0           | 1            |                                                      |          |          |          |          |          |          |          |                   |          |
| DQB1*03:31                                                  | 03:31                  | HLA05761  | 03:03:02G                                     | 0          | 0           | 37           | 0           | 0           | 0          | 2           | 39           |                                                      |          | WD       |          |          |          |          | WD       | WD                |          |
| DQB1*03:33                                                  | 03:33                  | HLA06144  | 03:03:02G                                     | 0          | 0           | 2            | 0           | 0           | 0          | 0           | 2            |                                                      |          |          |          |          |          |          |          |                   |          |
| DQB1*03:79                                                  | 03:79                  | HLA09653  | 03:03:02G                                     | 0          | 5           | 3            | 0           | 0           | 0          | 0           | 8            |                                                      | WD       |          |          |          |          |          | WD       | WD                |          |
| DQB1*03:96                                                  | 03:96                  | HLA10221  | 03:03:02G                                     | 0          | 0           | 1            | 0           | 0           | 0          | 0           | 1            |                                                      |          |          |          |          |          |          |          |                   |          |
| DQB1*03:249                                                 | 03:249                 | HLA16132  | 03:03:02G                                     | 0          | 0           | 0            | 0           | 0           | 0          | 1           | 1            |                                                      |          |          |          |          |          |          |          |                   |          |
| DQB1*03:03:03                                               | 03:03:03               | HLA01004  |                                               | 1          | 4           | 834          | 1           | 3           | 1          | 26          | 870          |                                                      |          | I        |          |          |          | I        | I        | I                 |          |
| DQB1*03:03:05                                               | 03:03:05               | HLA09281  |                                               | 0          | 0           | 2            | 0           | 0           | 0          | 2           | 4            |                                                      |          |          |          |          |          |          |          |                   |          |
| DQB1*03:03:06                                               | 03:03:06               | HLA09283  |                                               | 0          | 1           | 0            | 0           | 0           | 0          | 0           | 1            |                                                      |          |          |          |          |          |          |          |                   |          |
| DQB1*03:03:07                                               | 03:03:07               | HLA09650  |                                               | 1          | 1           | 2            | 0           | 0           | 1          | 0           | 5            |                                                      |          |          |          |          |          |          | WD       | WD                |          |
| DQB1*03:03:11                                               | 03:03:11               | HLA10280  |                                               | 0          | 0           | 1            | 0           | 10          | 2          | 3           | 16           |                                                      |          |          |          | I        |          |          | WD       | I                 |          |
| <b>DQB1*03:04 total</b>                                     | <b>03:04 total</b>     |           |                                               | <b>139</b> | <b>146</b>  | <b>33978</b> | <b>1071</b> | <b>1911</b> | <b>126</b> | <b>2862</b> | <b>40233</b> | <b>C</b>                                             | <b>C</b> | <b>C</b> | <b>C</b> | <b>C</b> | <b>C</b> | <b>C</b> | <b>C</b> | <b>C</b>          | <b>C</b> |
| DQB1*03:04                                                  | 03:04                  |           |                                               | 53         | 44          | 12441        | 420         | 728         | 74         | 984         | 14744        | C                                                    | I        | C        | C        | C        | C        | C        | C        | C                 | C        |
| <b>DQB1*03:04:01G total</b>                                 | <b>03:04:01G total</b> |           |                                               | <b>86</b>  | <b>102</b>  | <b>21536</b> | <b>651</b>  | <b>1180</b> | <b>51</b>  | <b>1877</b> | <b>25483</b> | <b>C</b>                                             | <b>I</b> | <b>C</b> | <b>C</b> | <b>C</b> | <b>C</b> | <b>C</b> | <b>C</b> | <b>C</b>          | <b>C</b> |
| DQB1*03:04:01G                                              | 03:04:01G              |           | 03:04:01G                                     | 0          | 11          | 189          | 0           | 39          | 1          | 110         | 350          |                                                      | WD       | I        |          | I        |          | I        | I        | I                 |          |
| DQB1*03:04:01                                               | 03:04:01               | HLA00630  | 03:04:01G                                     | 86         | 91          | 21346        | 651         | 1141        | 50         | 1767        | 25132        | C                                                    | I        | C        | C        | C        | C        | C        | C        | C                 | C        |
| DQB1*03:04:03                                               | 03:04:03               | HLA16154  | 03:04:01G                                     | 0          | 0           | 1            | 0           | 0           | 0          | 0           | 1            |                                                      |          |          |          |          |          |          |          |                   |          |
| DQB1*03:04:02                                               | 03:04:02               | HLA11278  |                                               | 0          | 0           | 1            | 0           | 3           | 1          | 1           | 6            |                                                      |          |          |          |          |          |          | WD       | WD                |          |
| <b>DQB1*03:05 total</b>                                     | <b>03:05 total</b>     |           |                                               | <b>57</b>  | <b>1528</b> | <b>13911</b> | <b>4505</b> | <b>515</b>  | <b>40</b>  | <b>3266</b> | <b>23822</b> | <b>C</b>                                             | <b>C</b> | <b>C</b> | <b>C</b> | <b>C</b> | <b>C</b> | <b>C</b> | <b>C</b> | <b>C</b>          | <b>C</b> |
| DQB1*03:05                                                  | 03:05                  |           |                                               | 7          | 41          | 1590         | 367         | 91          | 5          | 159         | 2260         | WD                                                   | I        | C        | C        | C        | WD       | C        | C        | C                 | C        |
| <b>DQB1*03:05:01G total</b>                                 | <b>03:05:01G total</b> |           |                                               | <b>46</b>  | <b>1423</b> | <b>11929</b> | <b>3987</b> | <b>403</b>  | <b>26</b>  | <b>3035</b> | <b>20849</b> | <b>C</b>                                             | <b>C</b> | <b>C</b> | <b>C</b> | <b>C</b> | <b>C</b> | <b>C</b> | <b>C</b> | <b>C</b>          | <b>C</b> |
| DQB1*03:05:01G                                              | 03:05:01G              |           | 03:05:01G                                     | 1          | 422         | 1272         | 154         | 78          | 3          | 1163        | 3093         |                                                      | C        | C        | C        | C        |          | C        | C        | C                 |          |
| DQB1*03:05:01                                               | 03:05:01               | HLA00631  | 03:05:01G                                     | 45         | 1001        | 10657        | 3833        | 325         | 23         | 1872        | 17756        | C                                                    | C        | C        | C        | C        | C        | C        | C        | C                 | C        |
| DQB1*03:05:02                                               | 03:05:02               | HLA01443  |                                               | 0          | 11          | 36           | 12          | 1           | 0          | 3           | 63           |                                                      | WD       | WD       | WD       |          |          |          | WD       | WD                |          |
| DQB1*03:05:03                                               | 03:05:03               | HLA01744  |                                               | 4          | 1           | 282          | 1           | 15          | 4          | 47          | 354          |                                                      |          | I        |          | I        |          | I        | I        | I                 |          |
| DQB1*03:05:04                                               | 03:05:04               | HLA02497  |                                               | 0          | 52          | 74           | 138         | 5           | 5          | 22          | 296          |                                                      | I        | WD       | C        | WD       | WD       | I        | I        | C                 |          |
| DQB1*03:06                                                  | 03:06                  | HLA00632  |                                               | 0          | 3           | 1            | 0           | 0           | 0          | 1           | 5            |                                                      |          |          |          |          |          |          | WD       | WD                |          |

| Supplemental Table 15: HLA-DQB1 Allele Summary <sup>a</sup> |                        |           | Allele Count by Population Group <sup>b</sup> |          |           |           |          |           |           |           |           | 3.0.0 CIWD Category by Population Group <sup>c</sup> |           |           |      |          |          |          |           |                   |
|-------------------------------------------------------------|------------------------|-----------|-----------------------------------------------|----------|-----------|-----------|----------|-----------|-----------|-----------|-----------|------------------------------------------------------|-----------|-----------|------|----------|----------|----------|-----------|-------------------|
| Allele                                                      | Genomic Typing         | Allele ID | G group                                       | AFA      | API       | EURO      | MENA     | HIS       | NAM       | UNK       | Total     | AFA                                                  | API       | EURO      | MENA | HIS      | NAM      | UNK      | Total     | Highest Frequency |
| DQB1*03:08                                                  | 03:08                  | HLA00634  |                                               | 1        | 0         | 101       | 0        | 1         | 0         | 17        | 120       |                                                      |           | WD        |      |          |          | I        | WD        | I                 |
| <b>DQB1*03:10 total</b>                                     | <b>03:10 total</b>     |           |                                               | <b>0</b> | <b>7</b>  | <b>45</b> | <b>1</b> | <b>1</b>  | <b>0</b>  | <b>0</b>  | <b>54</b> |                                                      | <b>WD</b> | <b>WD</b> |      |          |          |          | <b>WD</b> | <b>WD</b>         |
| DQB1*03:10                                                  | 03:10                  |           |                                               | 0        | 3         | 8         | 0        | 0         | 0         | 0         | 11        |                                                      |           | WD        |      |          |          |          | WD        | WD                |
| <b>DQB1*03:10:01G total</b>                                 | <b>03:10:01G total</b> |           |                                               | <b>0</b> | <b>2</b>  | <b>23</b> | <b>0</b> | <b>0</b>  | <b>0</b>  | <b>0</b>  | <b>25</b> |                                                      |           | <b>WD</b> |      |          |          |          | <b>WD</b> | <b>WD</b>         |
| DQB1*03:10:01G                                              | 03:10:01G              |           | 03:10:01G                                     | 0        | 0         | 1         | 0        | 0         | 0         | 0         | 1         |                                                      |           |           |      |          |          |          |           |                   |
| DQB1*03:10:01                                               | 03:10:01               | HLA01164  | 03:10:01G                                     | 0        | 2         | 7         | 0        | 0         | 0         | 0         | 9         |                                                      |           | WD        |      |          |          |          | WD        | WD                |
| DQB1*03:195                                                 | 03:195                 | HLA13919  | 03:10:01G                                     | 0        | 0         | 15        | 0        | 0         | 0         | 0         | 15        |                                                      |           | WD        |      |          |          |          | WD        | WD                |
| <b>DQB1*03:10:02G total</b>                                 | <b>03:10:02G total</b> |           |                                               | <b>0</b> | <b>2</b>  | <b>14</b> | <b>1</b> | <b>1</b>  | <b>0</b>  | <b>0</b>  | <b>18</b> |                                                      |           | <b>WD</b> |      |          |          |          | <b>WD</b> | <b>WD</b>         |
| DQB1*03:10:02G                                              | 03:10:02G              |           | 03:10:02G                                     | 0        | 1         | 0         | 0        | 0         | 0         | 0         | 1         |                                                      |           |           |      |          |          |          |           |                   |
| DQB1*03:10:02                                               | 03:10:02               |           | 03:10:02G                                     | 0        | 1         | 14        | 1        | 1         | 0         | 0         | 17        |                                                      |           | WD        |      |          |          |          | WD        | WD                |
| DQB1*03:11                                                  | 03:11                  | HLA01538  |                                               | 0        | 250       | 3         | 3        | 1         | 0         | 12        | 269       |                                                      | C         |           |      |          |          | WD       | I         | C                 |
| DQB1*03:12                                                  | 03:12                  | HLA01574  |                                               | 1        | 3         | 1086      | 1        | 0         | 0         | 10        | 1101      |                                                      |           | I         |      |          |          | WD       | I         | I                 |
| DQB1*03:13                                                  | 03:13                  | HLA01589  |                                               | 0        | 174       | 9         | 1        | 0         | 0         | 25        | 209       |                                                      | C         | WD        |      |          |          | I        | I         | C                 |
| <b>DQB1*03:14 total</b>                                     | <b>03:14 total</b>     |           |                                               | <b>1</b> | <b>35</b> | <b>6</b>  | <b>0</b> | <b>9</b>  | <b>0</b>  | <b>3</b>  | <b>54</b> |                                                      | <b>I</b>  | <b>WD</b> |      | <b>I</b> |          |          | <b>WD</b> | <b>I</b>          |
| DQB1*03:14                                                  | 03:14                  |           |                                               | 0        | 4         | 1         | 0        | 2         | 0         | 0         | 7         |                                                      |           |           |      |          |          |          | WD        | WD                |
| DQB1*03:14:01                                               | 03:14:01               | HLA02026  |                                               | 1        | 2         | 0         | 0        | 0         | 0         | 0         | 3         |                                                      |           |           |      |          |          |          |           |                   |
| DQB1*03:14:02                                               | 03:14:02               | HLA09240  |                                               | 0        | 29        | 5         | 0        | 7         | 0         | 3         | 44        |                                                      | I         | WD        |      | I        |          |          | WD        | I                 |
| DQB1*03:16                                                  | 03:16                  | HLA02208  |                                               | 53       | 1         | 1         | 0        | 4         | 0         | 10        | 69        | C                                                    |           |           |      |          |          | WD       | WD        | C                 |
| <b>DQB1*03:17 total</b>                                     | <b>03:17 total</b>     |           |                                               | <b>0</b> | <b>20</b> | <b>2</b>  | <b>0</b> | <b>1</b>  | <b>0</b>  | <b>0</b>  | <b>23</b> |                                                      | <b>I</b>  |           |      |          |          |          | <b>WD</b> | <b>I</b>          |
| DQB1*03:17                                                  | 03:17                  |           |                                               | 0        | 4         | 1         | 0        | 0         | 0         | 0         | 5         |                                                      |           |           |      |          |          |          | WD        | WD                |
| DQB1*03:17:01                                               | 03:17:01               | HLA02323  |                                               | 0        | 16        | 1         | 0        | 1         | 0         | 0         | 18        |                                                      | I         |           |      |          |          |          | WD        | I                 |
| DQB1*03:18                                                  | 03:18                  | HLA02372  |                                               | 0        | 0         | 12        | 0        | 0         | 0         | 6         | 18        |                                                      |           | WD        |      |          |          | WD       | WD        | WD                |
| DQB1*03:20                                                  | 03:20                  | HLA02887  |                                               | 0        | 0         | 10        | 0        | 0         | 0         | 0         | 10        |                                                      |           | WD        |      |          |          |          | WD        | WD                |
| <b>DQB1*03:23 total</b>                                     | <b>03:23 total</b>     |           |                                               | <b>0</b> | <b>1</b>  | <b>1</b>  | <b>0</b> | <b>0</b>  | <b>0</b>  | <b>1</b>  | <b>3</b>  |                                                      |           |           |      |          |          |          |           |                   |
| DQB1*03:23                                                  | 03:23                  |           |                                               | 0        | 0         | 0         | 0        | 0         | 0         | 1         | 1         |                                                      |           |           |      |          |          |          |           |                   |
| DQB1*03:23:01                                               | 03:23:01               | HLA03451  |                                               | 0        | 1         | 0         | 0        | 0         | 0         | 0         | 1         |                                                      |           |           |      |          |          |          |           |                   |
| DQB1*03:23:02                                               | 03:23:02               | HLA13580  |                                               | 0        | 0         | 1         | 0        | 0         | 0         | 0         | 1         |                                                      |           |           |      |          |          |          |           |                   |
| <b>DQB1*03:25 total</b>                                     | <b>03:25 total</b>     |           |                                               | <b>2</b> | <b>0</b>  | <b>11</b> | <b>0</b> | <b>56</b> | <b>10</b> | <b>18</b> | <b>97</b> |                                                      |           | <b>WD</b> |      | <b>I</b> | <b>C</b> | <b>I</b> | <b>WD</b> | <b>C</b>          |
| DQB1*03:25                                                  | 03:25                  |           |                                               | 1        | 0         | 8         | 0        | 35        | 6         | 6         | 56        |                                                      |           | WD        |      | I        | WD       | WD       | WD        | I                 |
| DQB1*03:25:01                                               | 03:25:01               | HLA03745  |                                               | 1        | 0         | 3         | 0        | 21        | 4         | 12        | 41        |                                                      |           |           |      | I        |          | WD       | WD        | I                 |
| DQB1*03:26                                                  | 03:26                  | HLA04356  |                                               | 0        | 15        | 0         | 0        | 0         | 0         | 1         | 16        |                                                      | I         |           |      |          |          |          | WD        | I                 |



| Supplemental Table 15: HLA-DQB1 Allele Summary <sup>a</sup> |                |           | Allele Count by Population Group <sup>b</sup> |     |     |      |      |     |     |     |       |     | 3.0.0 CIWD Category by Population Group <sup>c</sup> |      |      |     |     |     |       |                   |
|-------------------------------------------------------------|----------------|-----------|-----------------------------------------------|-----|-----|------|------|-----|-----|-----|-------|-----|------------------------------------------------------|------|------|-----|-----|-----|-------|-------------------|
| Allele                                                      | Genomic Typing | Allele ID | G group                                       | AFA | API | EURO | MENA | HIS | NAM | UNK | Total | AFA | API                                                  | EURO | MENA | HIS | NAM | UNK | Total | Highest Frequency |
| DQB1*03:27                                                  | 03:27          | HLA05374  |                                               | 0   | 3   | 0    | 0    | 0   | 0   | 0   | 3     |     |                                                      |      |      |     |     |     |       |                   |
| DQB1*03:28                                                  | 03:28          | HLA05767  |                                               | 0   | 0   | 2    | 0    | 0   | 0   | 0   | 2     |     |                                                      |      |      |     |     |     |       |                   |
| DQB1*03:30                                                  | 03:30          | HLA05774  |                                               | 0   | 0   | 14   | 0    | 1   | 0   | 0   | 15    |     |                                                      | WD   |      |     |     |     | WD    | WD                |
| DQB1*03:34                                                  | 03:34          | HLA06145  |                                               | 0   | 1   | 0    | 0    | 0   | 0   | 0   | 1     |     |                                                      |      |      |     |     |     |       |                   |
| DQB1*03:36                                                  | 03:36          | HLA06177  |                                               | 0   | 0   | 6    | 0    | 0   | 0   | 0   | 6     |     |                                                      | WD   |      |     |     |     | WD    | WD                |
| DQB1*03:37                                                  | 03:37          | HLA06516  |                                               | 0   | 0   | 90   | 1    | 0   | 0   | 20  | 111   |     |                                                      | WD   |      |     |     | I   | WD    | I                 |
| DQB1*03:38                                                  | 03:38          | HLA06880  |                                               | 0   | 1   | 0    | 0    | 0   | 0   | 0   | 1     |     |                                                      |      |      |     |     |     |       |                   |
| DQB1*03:40                                                  | 03:40          | HLA07799  |                                               | 0   | 0   | 18   | 0    | 0   | 0   | 2   | 20    |     |                                                      | WD   |      |     |     |     | WD    | WD                |
| DQB1*03:44                                                  | 03:44          | HLA08289  |                                               | 0   | 1   | 2    | 1    | 0   | 0   | 0   | 4     |     |                                                      |      |      |     |     |     |       |                   |
| DQB1*03:45                                                  | 03:45          | HLA08955  |                                               | 0   | 0   | 15   | 0    | 0   | 1   | 0   | 16    |     |                                                      | WD   |      |     |     |     | WD    | WD                |
| DQB1*03:46                                                  | 03:46          | HLA09093  |                                               | 0   | 0   | 1    | 0    | 0   | 0   | 0   | 1     |     |                                                      |      |      |     |     |     |       |                   |
| DQB1*03:47                                                  | 03:47          | HLA09095  |                                               | 0   | 0   | 2    | 0    | 0   | 0   | 1   | 3     |     |                                                      |      |      |     |     |     |       |                   |
| DQB1*03:48                                                  | 03:48          | HLA09129  |                                               | 0   | 0   | 6    | 0    | 0   | 0   | 0   | 6     |     |                                                      | WD   |      |     |     |     | WD    | WD                |
| DQB1*03:52                                                  | 03:52          | HLA09220  |                                               | 0   | 0   | 0    | 2    | 0   | 0   | 0   | 2     |     |                                                      |      |      |     |     |     |       |                   |
| DQB1*03:53                                                  | 03:53          | HLA09228  |                                               | 0   | 0   | 3    | 10   | 0   | 0   | 0   | 13    |     |                                                      |      | WD   |     |     |     | WD    | WD                |
| DQB1*03:54                                                  | 03:54          | HLA09231  |                                               | 0   | 0   | 3    | 2    | 1   | 0   | 1   | 7     |     |                                                      |      |      |     |     |     | WD    | WD                |
| DQB1*03:55                                                  | 03:55          | HLA09232  |                                               | 0   | 0   | 30   | 0    | 0   | 0   | 7   | 37    |     |                                                      | WD   |      |     |     | WD  | WD    | WD                |
| DQB1*03:56                                                  | 03:56          | HLA09234  |                                               | 0   | 0   | 7    | 0    | 0   | 0   | 1   | 8     |     |                                                      | WD   |      |     |     |     | WD    | WD                |
| DQB1*03:57                                                  | 03:57          | HLA09236  |                                               | 0   | 1   | 2    | 0    | 0   | 0   | 0   | 3     |     |                                                      |      |      |     |     |     |       |                   |
| DQB1*03:58                                                  | 03:58          | HLA09237  |                                               | 0   | 0   | 5    | 1    | 0   | 0   | 17  | 23    |     |                                                      | WD   |      |     |     | I   | WD    | I                 |
| DQB1*03:59                                                  | 03:59          | HLA09238  |                                               | 0   | 0   | 9    | 0    | 0   | 0   | 0   | 9     |     |                                                      | WD   |      |     |     |     | WD    | WD                |
| DQB1*03:60                                                  | 03:60          | HLA09241  |                                               | 0   | 0   | 4    | 0    | 0   | 0   | 0   | 4     |     |                                                      |      |      |     |     |     |       |                   |
| DQB1*03:61                                                  | 03:61          | HLA09261  |                                               | 0   | 0   | 1    | 0    | 0   | 0   | 0   | 1     |     |                                                      |      |      |     |     |     |       |                   |
| DQB1*03:62                                                  | 03:62          | HLA09263  |                                               | 0   | 11  | 0    | 0    | 0   | 0   | 1   | 12    |     | WD                                                   |      |      |     |     |     | WD    | WD                |
| DQB1*03:63                                                  | 03:63          | HLA09279  |                                               | 0   | 0   | 14   | 0    | 0   | 0   | 0   | 14    |     |                                                      | WD   |      |     |     |     | WD    | WD                |
| DQB1*03:64                                                  | 03:64          | HLA09280  |                                               | 0   | 1   | 10   | 0    | 1   | 0   | 2   | 14    |     |                                                      | WD   |      |     |     |     | WD    | WD                |
| DQB1*03:65                                                  | 03:65          | HLA09282  |                                               | 0   | 0   | 11   | 0    | 0   | 0   | 0   | 11    |     |                                                      | WD   |      |     |     |     | WD    | WD                |
| DQB1*03:67                                                  | 03:67          | HLA09286  |                                               | 2   | 0   | 24   | 0    | 1   | 0   | 7   | 34    |     |                                                      | WD   |      |     |     | WD  | WD    | WD                |
| DQB1*03:68                                                  | 03:68          | HLA09287  |                                               | 0   | 0   | 22   | 0    | 0   | 0   | 0   | 22    |     |                                                      | WD   |      |     |     |     | WD    | WD                |
| DQB1*03:69                                                  | 03:69          | HLA09289  |                                               | 0   | 1   | 2    | 1    | 0   | 0   | 2   | 6     |     |                                                      |      |      |     |     |     | WD    | WD                |
| DQB1*03:70                                                  | 03:70          | HLA09230  |                                               | 0   | 0   | 3    | 0    | 12  | 1   | 2   | 18    |     |                                                      |      |      | I   |     |     | WD    | I                 |

| Supplemental Table 15: HLA-DQB1 Allele Summary <sup>a</sup> |                |           | Allele Count by Population Group <sup>b</sup> |     |     |      |      |     |     |     |       |     | 3.0.0 CIWD Category by Population Group <sup>c</sup> |      |      |     |     |     |       |                   |
|-------------------------------------------------------------|----------------|-----------|-----------------------------------------------|-----|-----|------|------|-----|-----|-----|-------|-----|------------------------------------------------------|------|------|-----|-----|-----|-------|-------------------|
| Allele                                                      | Genomic Typing | Allele ID | G group                                       | AFA | API | EURO | MENA | HIS | NAM | UNK | Total | AFA | API                                                  | EURO | MENA | HIS | NAM | UNK | Total | Highest Frequency |
| DQB1*03:71                                                  | 03:71          | HLA09356  |                                               | 0   | 0   | 2    | 0    | 1   | 0   | 0   | 3     |     |                                                      |      |      |     |     |     |       |                   |
| DQB1*03:72                                                  | 03:72          | HLA09360  |                                               | 0   | 0   | 4    | 0    | 35  | 4   | 14  | 57    |     |                                                      |      |      | I   |     | I   | WD    | I                 |
| DQB1*03:74                                                  | 03:74          | HLA09635  |                                               | 1   | 0   | 1    | 0    | 0   | 0   | 0   | 2     |     |                                                      |      |      |     |     |     |       |                   |
| DQB1*03:75                                                  | 03:75          | HLA09636  |                                               | 1   | 0   | 0    | 0    | 0   | 0   | 1   | 2     |     |                                                      |      |      |     |     |     |       |                   |
| DQB1*03:76                                                  | 03:76          | HLA09637  |                                               | 0   | 0   | 5    | 0    | 0   | 0   | 0   | 5     |     |                                                      | WD   |      |     |     |     | WD    | WD                |
| DQB1*03:78                                                  | 03:78          | HLA09640  |                                               | 0   | 11  | 1    | 0    | 0   | 0   | 0   | 12    |     | WD                                                   |      |      |     |     |     | WD    | WD                |
| DQB1*03:81                                                  | 03:81          | HLA09732  |                                               | 0   | 0   | 9    | 0    | 0   | 0   | 1   | 10    |     |                                                      | WD   |      |     |     |     | WD    | WD                |
| DQB1*03:82                                                  | 03:82          | HLA09773  |                                               | 0   | 0   | 1    | 0    | 0   | 0   | 0   | 1     |     |                                                      |      |      |     |     |     |       |                   |
| DQB1*03:86                                                  | 03:86          | HLA09848  |                                               | 0   | 1   | 0    | 0    | 0   | 0   | 0   | 1     |     |                                                      |      |      |     |     |     |       |                   |
| DQB1*03:92                                                  | 03:92          | HLA10210  |                                               | 0   | 0   | 2    | 0    | 0   | 0   | 0   | 2     |     |                                                      |      |      |     |     |     |       |                   |
| DQB1*03:95N                                                 | 03:95N         | HLA10219  |                                               | 0   | 0   | 1    | 0    | 0   | 0   | 0   | 1     |     |                                                      |      |      |     |     |     |       |                   |
| DQB1*03:101                                                 | 03:101         | HLA10274  |                                               | 0   | 2   | 0    | 0    | 0   | 0   | 0   | 2     |     |                                                      |      |      |     |     |     |       |                   |
| DQB1*03:102                                                 | 03:102         | HLA10275  |                                               | 0   | 0   | 3    | 0    | 0   | 0   | 0   | 3     |     |                                                      |      |      |     |     |     |       |                   |
| DQB1*03:104                                                 | 03:104         | HLA10284  |                                               | 0   | 2   | 0    | 0    | 0   | 0   | 0   | 2     |     |                                                      |      |      |     |     |     |       |                   |
| DQB1*03:105                                                 | 03:105         | HLA10285  |                                               | 0   | 0   | 2    | 0    | 7   | 0   | 0   | 9     |     |                                                      |      |      | I   |     |     | WD    | I                 |
| DQB1*03:106                                                 | 03:106         | HLA10286  |                                               | 0   | 7   | 4    | 0    | 11  | 0   | 2   | 24    |     | WD                                                   |      |      | I   |     |     | WD    | I                 |
| DQB1*03:107                                                 | 03:107         | HLA10287  |                                               | 0   | 0   | 1    | 0    | 0   | 0   | 0   | 1     |     |                                                      |      |      |     |     |     |       |                   |
| DQB1*03:109                                                 | 03:109         | HLA10541  |                                               | 0   | 0   | 28   | 0    | 0   | 0   | 0   | 28    |     |                                                      | WD   |      |     |     |     | WD    | WD                |
| DQB1*03:111                                                 | 03:111         | HLA10547  |                                               | 0   | 1   | 0    | 0    | 0   | 0   | 0   | 1     |     |                                                      |      |      |     |     |     |       |                   |
| DQB1*03:112                                                 | 03:112         | HLA10548  |                                               | 0   | 0   | 3    | 0    | 0   | 0   | 0   | 3     |     |                                                      |      |      |     |     |     |       |                   |
| DQB1*03:113                                                 | 03:113         | HLA10663  |                                               | 0   | 1   | 2    | 0    | 0   | 0   | 0   | 3     |     |                                                      |      |      |     |     |     |       |                   |
| DQB1*03:114                                                 | 03:114         | HLA10928  |                                               | 0   | 0   | 22   | 1    | 1   | 0   | 1   | 25    |     |                                                      | WD   |      |     |     |     | WD    | WD                |
| DQB1*03:118N                                                | 03:118N        | HLA11127  |                                               | 0   | 9   | 0    | 0    | 0   | 0   | 0   | 9     |     | WD                                                   |      |      |     |     |     | WD    | WD                |
| DQB1*03:119                                                 | 03:119         | HLA11128  |                                               | 0   | 0   | 1    | 0    | 0   | 0   | 0   | 1     |     |                                                      |      |      |     |     |     |       |                   |
| DQB1*03:120                                                 | 03:120         | HLA11129  |                                               | 0   | 0   | 2    | 0    | 0   | 0   | 0   | 2     |     |                                                      |      |      |     |     |     |       |                   |
| DQB1*03:121                                                 | 03:121         | HLA11130  |                                               | 0   | 4   | 0    | 0    | 2   | 0   | 0   | 6     |     |                                                      |      |      |     |     |     | WD    | WD                |
| DQB1*03:122                                                 | 03:122         | HLA11131  |                                               | 1   | 0   | 0    | 0    | 0   | 0   | 0   | 1     |     |                                                      |      |      |     |     |     |       |                   |
| DQB1*03:125                                                 | 03:125         | HLA11143  |                                               | 0   | 0   | 2    | 0    | 0   | 0   | 0   | 2     |     |                                                      |      |      |     |     |     |       |                   |
| DQB1*03:126                                                 | 03:126         | HLA11144  |                                               | 0   | 0   | 3    | 0    | 0   | 0   | 2   | 5     |     |                                                      |      |      |     |     |     | WD    | WD                |
| DQB1*03:127                                                 | 03:127         | HLA11272  |                                               | 1   | 0   | 0    | 0    | 2   | 0   | 2   | 5     |     |                                                      |      |      |     |     |     | WD    | WD                |
| DQB1*03:130                                                 | 03:130         | HLA11276  |                                               | 0   | 0   | 25   | 0    | 0   | 0   | 0   | 25    |     |                                                      | WD   |      |     |     |     | WD    | WD                |

| Supplemental Table 15: HLA-DQB1 Allele Summary <sup>a</sup> |                |           | Allele Count by Population Group <sup>b</sup> |     |     |      |      |     |     |     |       | 3.0.0 CIWD Category by Population Group <sup>c</sup> |     |      |      |     |     |     |       |                   |
|-------------------------------------------------------------|----------------|-----------|-----------------------------------------------|-----|-----|------|------|-----|-----|-----|-------|------------------------------------------------------|-----|------|------|-----|-----|-----|-------|-------------------|
| Allele                                                      | Genomic Typing | Allele ID | G group                                       | AFA | API | EURO | MENA | HIS | NAM | UNK | Total | AFA                                                  | API | EURO | MENA | HIS | NAM | UNK | Total | Highest Frequency |
| DQB1*03:131                                                 | 03:131         | HLA11277  |                                               | 0   | 0   | 0    | 0    | 2   | 0   | 0   | 2     |                                                      |     |      |      |     |     |     |       |                   |
| DQB1*03:132                                                 | 03:132         | HLA11558  |                                               | 1   | 0   | 0    | 0    | 12  | 0   | 1   | 14    |                                                      |     |      |      | I   |     |     | WD    | I                 |
| DQB1*03:133                                                 | 03:133         | HLA11348  |                                               | 0   | 0   | 3    | 0    | 0   | 0   | 0   | 3     |                                                      |     |      |      |     |     |     |       |                   |
| DQB1*03:134                                                 | 03:134         | HLA11350  |                                               | 0   | 0   | 14   | 0    | 0   | 0   | 0   | 14    |                                                      |     | WD   |      |     |     |     | WD    | WD                |
| DQB1*03:136                                                 | 03:136         | HLA11356  |                                               | 1   | 0   | 43   | 0    | 0   | 0   | 7   | 51    |                                                      |     | WD   |      |     |     | WD  | WD    | WD                |
| DQB1*03:137                                                 | 03:137         | HLA11357  |                                               | 0   | 0   | 3    | 0    | 0   | 0   | 0   | 3     |                                                      |     |      |      |     |     |     |       |                   |
| DQB1*03:138                                                 | 03:138         | HLA11358  |                                               | 0   | 0   | 14   | 0    | 0   | 0   | 2   | 16    |                                                      |     | WD   |      |     |     |     | WD    | WD                |
| DQB1*03:141                                                 | 03:141         | HLA11591  |                                               | 0   | 0   | 13   | 0    | 0   | 0   | 0   | 13    |                                                      |     | WD   |      |     |     |     | WD    | WD                |
| DQB1*03:142                                                 | 03:142         | HLA11598  |                                               | 0   | 1   | 0    | 0    | 0   | 0   | 0   | 1     |                                                      |     |      |      |     |     |     |       |                   |
| DQB1*03:143                                                 | 03:143         | HLA11671  |                                               | 0   | 0   | 1    | 0    | 0   | 0   | 0   | 1     |                                                      |     |      |      |     |     |     |       |                   |
| DQB1*03:145                                                 | 03:145         | HLA11678  |                                               | 0   | 1   | 0    | 0    | 0   | 0   | 0   | 1     |                                                      |     |      |      |     |     |     |       |                   |
| DQB1*03:149                                                 | 03:149         | HLA12028  |                                               | 0   | 0   | 0    | 0    | 0   | 0   | 1   | 1     |                                                      |     |      |      |     |     |     |       |                   |
| DQB1*03:150                                                 | 03:150         | HLA12046  |                                               | 2   | 0   | 0    | 0    | 0   | 0   | 1   | 3     |                                                      |     |      |      |     |     |     |       |                   |
| DQB1*03:153                                                 | 03:153         | HLA12211  |                                               | 0   | 0   | 2    | 0    | 0   | 0   | 0   | 2     |                                                      |     |      |      |     |     |     |       |                   |
| DQB1*03:154                                                 | 03:154         | HLA12352  |                                               | 0   | 0   | 2    | 0    | 0   | 0   | 0   | 2     |                                                      |     |      |      |     |     |     |       |                   |
| DQB1*03:157                                                 | 03:157         | HLA12359  |                                               | 0   | 0   | 0    | 0    | 1   | 0   | 0   | 1     |                                                      |     |      |      |     |     |     |       |                   |
| DQB1*03:159                                                 | 03:159         | HLA12519  |                                               | 0   | 0   | 2    | 0    | 0   | 0   | 0   | 2     |                                                      |     |      |      |     |     |     |       |                   |
| DQB1*03:160                                                 | 03:160         | HLA12520  |                                               | 0   | 0   | 4    | 0    | 0   | 0   | 0   | 4     |                                                      |     |      |      |     |     |     |       |                   |
| DQB1*03:162                                                 | 03:162         | HLA12474  |                                               | 0   | 0   | 5    | 0    | 0   | 0   | 0   | 5     |                                                      |     | WD   |      |     |     |     | WD    | WD                |
| DQB1*03:166                                                 | 03:166         | HLA12788  |                                               | 0   | 0   | 2    | 0    | 0   | 0   | 0   | 2     |                                                      |     |      |      |     |     |     |       |                   |
| DQB1*03:167                                                 | 03:167         | HLA12795  |                                               | 0   | 0   | 0    | 0    | 0   | 0   | 1   | 1     |                                                      |     |      |      |     |     |     |       |                   |
| DQB1*03:170                                                 | 03:170         | HLA13118  |                                               | 1   | 0   | 0    | 0    | 0   | 0   | 0   | 1     |                                                      |     |      |      |     |     |     |       |                   |
| DQB1*03:171                                                 | 03:171         | HLA13119  |                                               | 0   | 0   | 1    | 0    | 0   | 0   | 0   | 1     |                                                      |     |      |      |     |     |     |       |                   |
| DQB1*03:174                                                 | 03:174         | HLA13123  |                                               | 0   | 0   | 2    | 0    | 1   | 0   | 1   | 4     |                                                      |     |      |      |     |     |     |       |                   |
| DQB1*03:178                                                 | 03:178         | HLA13139  |                                               | 0   | 0   | 0    | 1    | 0   | 0   | 0   | 1     |                                                      |     |      |      |     |     |     |       |                   |
| DQB1*03:179                                                 | 03:179         | HLA13246  |                                               | 0   | 0   | 1    | 0    | 0   | 0   | 0   | 1     |                                                      |     |      |      |     |     |     |       |                   |
| DQB1*03:183                                                 | 03:183         | HLA13578  |                                               | 0   | 1   | 0    | 0    | 0   | 0   | 0   | 1     |                                                      |     |      |      |     |     |     |       |                   |
| DQB1*03:184                                                 | 03:184         | HLA13579  |                                               | 0   | 2   | 2    | 0    | 0   | 0   | 0   | 4     |                                                      |     |      |      |     |     |     |       |                   |
| DQB1*03:185                                                 | 03:185         | HLA13581  |                                               | 0   | 0   | 1    | 0    | 0   | 0   | 0   | 1     |                                                      |     |      |      |     |     |     |       |                   |
| DQB1*03:187                                                 | 03:187         | HLA13678  |                                               | 1   | 0   | 0    | 0    | 0   | 0   | 0   | 1     |                                                      |     |      |      |     |     |     |       |                   |
| DQB1*03:188                                                 | 03:188         | HLA13679  |                                               | 0   | 1   | 2    | 0    | 0   | 0   | 0   | 3     |                                                      |     |      |      |     |     |     |       |                   |

| Supplemental Table 15: HLA-DQB1 Allele Summary <sup>a</sup> |                        |           | Allele Count by Population Group <sup>b</sup> |              |              |               |             |              |             |              |               |           | 3.0.0 CIWD Category by Population Group <sup>c</sup> |          |          |          |          |          |          |                   |
|-------------------------------------------------------------|------------------------|-----------|-----------------------------------------------|--------------|--------------|---------------|-------------|--------------|-------------|--------------|---------------|-----------|------------------------------------------------------|----------|----------|----------|----------|----------|----------|-------------------|
| Allele                                                      | Genomic Typing         | Allele ID | G group                                       | AFA          | API          | EURO          | MENA        | HIS          | NAM         | UNK          | Total         | AFA       | API                                                  | EURO     | MENA     | HIS      | NAM      | UNK      | Total    | Highest Frequency |
| DQB1*03:189                                                 | 03:189                 | HLA13682  |                                               | 0            | 0            | 1             | 0           | 0            | 0           | 0            | 1             |           |                                                      |          |          |          |          |          |          |                   |
| DQB1*03:194                                                 | 03:194                 | HLA13881  |                                               | 0            | 0            | 1             | 0           | 0            | 0           | 0            | 1             |           |                                                      |          |          |          |          |          |          |                   |
| DQB1*03:197Q                                                | 03:197Q                | HLA13930  |                                               | 0            | 0            | 0             | 5           | 0            | 0           | 1            | 6             |           |                                                      |          | WD       |          |          |          | WD       | WD                |
| DQB1*03:199                                                 | 03:199                 | HLA13938  |                                               | 0            | 1            | 2             | 0           | 0            | 0           | 0            | 3             |           |                                                      |          |          |          |          |          |          |                   |
| DQB1*03:201                                                 | 03:201                 | HLA14035  |                                               | 0            | 0            | 15            | 0           | 0            | 0           | 0            | 15            |           |                                                      | WD       |          |          |          |          | WD       | WD                |
| DQB1*03:204                                                 | 03:204                 | HLA14039  |                                               | 0            | 3            | 0             | 0           | 0            | 0           | 0            | 3             |           |                                                      |          |          |          |          |          |          |                   |
| DQB1*03:205                                                 | 03:205                 | HLA14040  |                                               | 0            | 1            | 6             | 0           | 0            | 0           | 0            | 7             |           |                                                      | WD       |          |          |          |          | WD       | WD                |
| DQB1*03:207                                                 | 03:207                 | HLA14160  |                                               | 0            | 0            | 0             | 0           | 1            | 3           | 1            | 5             |           |                                                      |          |          |          |          |          | WD       | WD                |
| DQB1*03:211                                                 | 03:211                 | HLA14166  |                                               | 0            | 0            | 1             | 0           | 0            | 0           | 0            | 1             |           |                                                      |          |          |          |          |          |          |                   |
| DQB1*03:212                                                 | 03:212                 | HLA14167  |                                               | 0            | 1            | 0             | 0           | 0            | 0           | 0            | 1             |           |                                                      |          |          |          |          |          |          |                   |
| DQB1*03:215                                                 | 03:215                 | HLA14171  |                                               | 0            | 0            | 4             | 0           | 0            | 0           | 0            | 4             |           |                                                      |          |          |          |          |          |          |                   |
| DQB1*03:217                                                 | 03:217                 | HLA14346  |                                               | 0            | 0            | 0             | 0           | 0            | 0           | 1            | 1             |           |                                                      |          |          |          |          |          |          |                   |
| DQB1*03:218                                                 | 03:218                 | HLA14202  |                                               | 0            | 0            | 4             | 0           | 0            | 0           | 0            | 4             |           |                                                      |          |          |          |          |          |          |                   |
| DQB1*03:224                                                 | 03:224                 | HLA14761  |                                               | 0            | 1            | 0             | 0           | 0            | 0           | 0            | 1             |           |                                                      |          |          |          |          |          |          |                   |
| DQB1*03:228                                                 | 03:228                 | HLA15068  |                                               | 0            | 2            | 0             | 0           | 0            | 0           | 0            | 2             |           |                                                      |          |          |          |          |          |          |                   |
| DQB1*03:229                                                 | 03:229                 | HLA15001  |                                               | 0            | 0            | 1             | 0           | 0            | 0           | 0            | 1             |           |                                                      |          |          |          |          |          |          |                   |
| DQB1*03:235                                                 | 03:235                 | HLA15679  |                                               | 0            | 0            | 1             | 0           | 0            | 0           | 0            | 1             |           |                                                      |          |          |          |          |          |          |                   |
| DQB1*03:268                                                 | 03:268                 | HLA17520  |                                               | 0            | 1            | 0             | 0           | 0            | 0           | 0            | 1             |           |                                                      |          |          |          |          |          |          |                   |
| DQB1*03:CODE                                                | 03:CODE                |           |                                               | 4001         | 5992         | 62316         | 392         | 9946         | 617         | 11353        | 94617         | NA        | NA                                                   | NA       | NA       | NA       | NA       | NA       | NA       | NA                |
| <b>DQB1*04:01 total</b>                                     | <b>04:01 total</b>     |           |                                               | <b>19</b>    | <b>18612</b> | <b>865</b>    | <b>357</b>  | <b>83</b>    | <b>16</b>   | <b>3161</b>  | <b>23113</b>  | <b>WD</b> | <b>C</b>                                             | <b>I</b> | <b>C</b> | <b>C</b> | <b>C</b> | <b>C</b> | <b>C</b> | <b>C</b>          |
| DQB1*04:01                                                  | 04:01                  |           |                                               | 0            | 18           | 10            | 10          | 1            | 0           | 3            | 42            |           | I                                                    | WD       | WD       |          |          |          | WD       | I                 |
| <b>DQB1*04:01:01G total</b>                                 | <b>04:01:01G total</b> |           |                                               | <b>19</b>    | <b>18575</b> | <b>853</b>    | <b>336</b>  | <b>82</b>    | <b>16</b>   | <b>3158</b>  | <b>23039</b>  | <b>WD</b> | <b>C</b>                                             | <b>I</b> | <b>C</b> | <b>C</b> | <b>C</b> | <b>C</b> | <b>C</b> | <b>C</b>          |
| DQB1*04:01:01G                                              | 04:01:01G              |           | 04:01:01G                                     | 10           | 11666        | 252           | 48          | 39           | 12          | 1702         | 13729         | WD        | C                                                    | I        | C        | I        | C        | C        | C        | C                 |
| DQB1*04:01:01                                               | 04:01:01               |           | 04:01:01G                                     | 9            | 6909         | 601           | 288         | 43           | 4           | 1456         | 9310          | WD        | C                                                    | I        | C        | I        |          | C        | C        | C                 |
| DQB1*04:01:02                                               | 04:01:02               | HLA03782  |                                               | 0            | 19           | 2             | 11          | 0            | 0           | 0            | 32            |           | I                                                    |          | WD       |          |          |          | WD       | I                 |
| <b>DQB1*04:02 total</b>                                     | <b>04:02 total</b>     |           |                                               | <b>25647</b> | <b>20495</b> | <b>341850</b> | <b>9251</b> | <b>66670</b> | <b>5930</b> | <b>48276</b> | <b>518119</b> | <b>C</b>  | <b>C</b>                                             | <b>C</b> | <b>C</b> | <b>C</b> | <b>C</b> | <b>C</b> | <b>C</b> | <b>C</b>          |
| DQB1*04:02                                                  | 04:02                  |           |                                               | 952          | 923          | 29659         | 740         | 2124         | 157         | 1345         | 35900         | C         | C                                                    | C        | C        | C        | C        | C        | C        | C                 |
| DQB1*04:02P                                                 | 04:02P                 |           |                                               | 0            | 0            | 2             | 0           | 0            | 0           | 2            | 4             |           |                                                      |          |          |          |          |          |          |                   |
| <b>DQB1*04:02:01G total</b>                                 | <b>04:02:01G total</b> |           |                                               | <b>24694</b> | <b>19538</b> | <b>312112</b> | <b>8511</b> | <b>64542</b> | <b>5772</b> | <b>46915</b> | <b>482084</b> | <b>C</b>  | <b>C</b>                                             | <b>C</b> | <b>C</b> | <b>C</b> | <b>C</b> | <b>C</b> | <b>C</b> | <b>C</b>          |
| DQB1*04:02:01G                                              | 04:02:01G              |           | 04:02:01G                                     | 8947         | 12019        | 57323         | 2913        | 27675        | 2283        | 28921        | 140081        | C         | C                                                    | C        | C        | C        | C        | C        | C        | C                 |
| DQB1*04:02:01                                               | 04:02:01               |           | 04:02:01G                                     | 15718        | 7476         | 253951        | 5577        | 36085        | 3440        | 17843        | 340090        | C         | C                                                    | C        | C        | C        | C        | C        | C        | C                 |

| Supplemental Table 15: HLA-DQB1 Allele Summary <sup>a</sup> |                    |           | Allele Count by Population Group <sup>b</sup> |          |          |           |          |          |          |          |           | 3.0.0 CIWD Category by Population Group <sup>c</sup> |     |           |      |     |     |     |           |                   |
|-------------------------------------------------------------|--------------------|-----------|-----------------------------------------------|----------|----------|-----------|----------|----------|----------|----------|-----------|------------------------------------------------------|-----|-----------|------|-----|-----|-----|-----------|-------------------|
| Allele                                                      | Genomic Typing     | Allele ID | G group                                       | AFA      | API      | EURO      | MENA     | HIS      | NAM      | UNK      | Total     | AFA                                                  | API | EURO      | MENA | HIS | NAM | UNK | Total     | Highest Frequency |
| DQB1*04:02:01:01                                            | 04:02:01:01        | HLA00637  | 04:02:01G                                     | 29       | 43       | 831       | 21       | 782      | 49       | 149      | 1904      | WD                                                   | I   | I         | WD   | C   | C   | C   | C         | C                 |
| DQB1*04:02:10                                               | 04:02:10           | HLA13933  | 04:02:01G                                     | 0        | 0        | 1         | 0        | 0        | 0        | 0        | 1         |                                                      |     |           |      |     |     |     |           |                   |
| DQB1*04:02:12                                               | 04:02:12           | HLA16185  | 04:02:01G                                     | 0        | 0        | 3         | 0        | 0        | 0        | 0        | 3         |                                                      |     |           |      |     |     |     |           |                   |
| DQB1*04:02:13                                               | 04:02:13           | HLA17165  | 04:02:01G                                     | 0        | 0        | 1         | 0        | 0        | 0        | 1        | 2         |                                                      |     |           |      |     |     |     |           |                   |
| DQB1*04:13                                                  | 04:13              | HLA09652  | 04:02:01G                                     | 0        | 0        | 1         | 0        | 0        | 0        | 0        | 1         |                                                      |     |           |      |     |     |     |           |                   |
| DQB1*04:39                                                  | 04:39              | HLA16318  | 04:02:01G                                     | 0        | 0        | 0         | 0        | 0        | 0        | 1        | 1         |                                                      |     |           |      |     |     |     |           |                   |
| DQB1*04:41N                                                 | 04:41N             | HLA17403  | 04:02:01G                                     | 0        | 0        | 1         | 0        | 0        | 0        | 0        | 1         |                                                      |     |           |      |     |     |     |           |                   |
| DQB1*04:02:02                                               | 04:02:02           | HLA05770  |                                               | 0        | 0        | 7         | 0        | 0        | 0        | 0        | 7         |                                                      |     | WD        |      |     |     |     | WD        | WD                |
| DQB1*04:02:03                                               | 04:02:03           | HLA09361  |                                               | 0        | 34       | 69        | 0        | 0        | 0        | 3        | 106       |                                                      | I   | WD        |      |     |     |     | WD        | I                 |
| DQB1*04:02:04                                               | 04:02:04           | HLA09745  |                                               | 0        | 0        | 1         | 0        | 3        | 0        | 1        | 5         |                                                      |     |           |      |     |     |     | WD        | WD                |
| DQB1*04:02:06                                               | 04:02:06           | HLA11364  |                                               | 0        | 0        | 0         | 0        | 1        | 1        | 0        | 2         |                                                      |     |           |      |     |     |     |           |                   |
| DQB1*04:02:07                                               | 04:02:07           | HLA12048  |                                               | 0        | 0        | 0         | 0        | 0        | 0        | 10       | 10        |                                                      |     |           |      |     |     |     | WD        | WD                |
| DQB1*04:02:08                                               | 04:02:08           | HLA12049  |                                               | 0        | 0        | 1         | 0        | 0        | 0        | 0        | 1         |                                                      |     |           |      |     |     |     |           |                   |
| DQB1*04:02:09                                               | 04:02:09           | HLA13148  |                                               | 1        | 0        | 0         | 0        | 0        | 0        | 0        | 1         |                                                      |     |           |      |     |     |     |           |                   |
| <b>DQB1*04:03 total</b>                                     | <b>04:03 total</b> |           |                                               | <b>0</b> | <b>1</b> | <b>17</b> | <b>0</b> | <b>4</b> | <b>0</b> | <b>1</b> | <b>23</b> |                                                      |     | <b>WD</b> |      |     |     |     | <b>WD</b> | <b>WD</b>         |
| DQB1*04:03                                                  | 04:03              |           |                                               | 0        | 0        | 2         | 0        | 0        | 0        | 0        | 2         |                                                      |     |           |      |     |     |     |           |                   |
| DQB1*04:03:01                                               | 04:03:01           | HLA03234  |                                               | 0        | 0        | 6         | 0        | 3        | 0        | 0        | 9         |                                                      |     | WD        |      |     |     |     | WD        | WD                |
| DQB1*04:03:02                                               | 04:03:02           | HLA04125  |                                               | 0        | 1        | 9         | 0        | 1        | 0        | 1        | 12        |                                                      |     | WD        |      |     |     |     | WD        | WD                |
| DQB1*04:04                                                  | 04:04              | HLA04390  |                                               | 0        | 0        | 98        | 0        | 0        | 0        | 1        | 99        |                                                      |     | WD        |      |     |     |     | WD        | WD                |
| DQB1*04:11                                                  | 04:11              | HLA09359  |                                               | 0        | 0        | 21        | 0        | 0        | 0        | 2        | 23        |                                                      |     | WD        |      |     |     |     | WD        | WD                |
| DQB1*04:12                                                  | 04:12              | HLA09362  |                                               | 0        | 25       | 0         | 0        | 1        | 0        | 2        | 28        |                                                      | I   |           |      |     |     |     | WD        | I                 |
| DQB1*04:18                                                  | 04:18              | HLA10294  |                                               | 2        | 0        | 0         | 0        | 0        | 0        | 1        | 3         |                                                      |     |           |      |     |     |     |           |                   |
| DQB1*04:19                                                  | 04:19              | HLA10932  |                                               | 0        | 0        | 0         | 0        | 1        | 0        | 0        | 1         |                                                      |     |           |      |     |     |     |           |                   |
| DQB1*04:20                                                  | 04:20              | HLA11362  |                                               | 0        | 0        | 0         | 0        | 0        | 0        | 1        | 1         |                                                      |     |           |      |     |     |     |           |                   |
| DQB1*04:21                                                  | 04:21              | HLA11363  |                                               | 0        | 0        | 2         | 0        | 1        | 0        | 1        | 4         |                                                      |     |           |      |     |     |     |           |                   |
| DQB1*04:22                                                  | 04:22              | HLA11365  |                                               | 4        | 0        | 0         | 0        | 0        | 0        | 1        | 5         |                                                      |     |           |      |     |     |     | WD        | WD                |
| DQB1*04:26                                                  | 04:26              | HLA12802  |                                               | 0        | 0        | 1         | 0        | 0        | 0        | 0        | 1         |                                                      |     |           |      |     |     |     |           |                   |
| DQB1*04:27                                                  | 04:27              | HLA12803  |                                               | 0        | 0        | 3         | 0        | 0        | 0        | 0        | 3         |                                                      |     |           |      |     |     |     |           |                   |
| DQB1*04:28                                                  | 04:28              | HLA13146  |                                               | 0        | 0        | 1         | 0        | 0        | 0        | 0        | 1         |                                                      |     |           |      |     |     |     |           |                   |
| DQB1*04:30                                                  | 04:30              | HLA13939  |                                               | 0        | 0        | 3         | 0        | 0        | 0        | 0        | 3         |                                                      |     |           |      |     |     |     |           |                   |
| DQB1*04:32                                                  | 04:32              | HLA13982  |                                               | 0        | 0        | 2         | 0        | 0        | 0        | 0        | 2         |                                                      |     |           |      |     |     |     |           |                   |

| Supplemental Table 15: HLA-DQB1 Allele Summary <sup>a</sup> |                        |           | Allele Count by Population Group <sup>b</sup> |              |               |                |              |              |             |               |                | 3.0.0 CIWD Category by Population Group <sup>c</sup> |          |          |          |          |          |          |          |                   |
|-------------------------------------------------------------|------------------------|-----------|-----------------------------------------------|--------------|---------------|----------------|--------------|--------------|-------------|---------------|----------------|------------------------------------------------------|----------|----------|----------|----------|----------|----------|----------|-------------------|
| Allele                                                      | Genomic Typing         | Allele ID | G group                                       | AFA          | API           | EURO           | MENA         | HIS          | NAM         | UNK           | Total          | AFA                                                  | API      | EURO     | MENA     | HIS      | NAM      | UNK      | Total    | Highest Frequency |
| DQB1*04:33                                                  | 04:33                  | HLA14350  |                                               | 0            | 0             | 2              | 0            | 0            | 0           | 0             | 2              |                                                      |          |          |          |          |          |          |          |                   |
| DQB1*04:34                                                  | 04:34                  | HLA14763  |                                               | 0            | 1             | 0              | 0            | 0            | 0           | 0             | 1              |                                                      |          |          |          |          |          |          |          |                   |
| DQB1*04:36N                                                 | 04:36N                 | HLA15327  |                                               | 0            | 0             | 1              | 0            | 3            | 0           | 0             | 4              |                                                      |          |          |          |          |          |          |          |                   |
| DQB1*04:CODE                                                | 04:CODE                |           |                                               | 1018         | 816           | 4046           | 31           | 2409         | 131         | 1133          | 9584           | NA                                                   | NA       | NA       | NA       | NA       | NA       | NA       | NA       | NA                |
| <b>DQB1*05:01 total</b>                                     | <b>05:01 total</b>     |           |                                               | <b>55148</b> | <b>124233</b> | <b>1361411</b> | <b>36298</b> | <b>72282</b> | <b>7284</b> | <b>135788</b> | <b>1792444</b> | <b>C</b>                                             | <b>C</b> | <b>C</b> | <b>C</b> | <b>C</b> | <b>C</b> | <b>C</b> | <b>C</b> | <b>C</b>          |
| DQB1*05:01                                                  | 05:01                  |           |                                               | 1953         | 2694          | 118968         | 3200         | 3280         | 172         | 3092          | 133359         | C                                                    | C        | C        | C        | C        | C        | C        | C        | C                 |
| DQB1*05:01P                                                 | 05:01P                 |           |                                               | 0            | 0             | 28             | 1            | 0            | 0           | 13            | 42             |                                                      |          | WD       |          |          |          | I        | WD       | I                 |
| <b>DQB1*05:01:01G total</b>                                 | <b>05:01:01G total</b> |           |                                               | <b>53194</b> | <b>121527</b> | <b>1242295</b> | <b>33094</b> | <b>69002</b> | <b>7112</b> | <b>132656</b> | <b>1658880</b> | <b>C</b>                                             | <b>C</b> | <b>C</b> | <b>C</b> | <b>C</b> | <b>C</b> | <b>C</b> | <b>C</b> | <b>C</b>          |
| DQB1*05:01:01G                                              | 05:01:01G              |           | 05:01:01G                                     | 19185        | 87662         | 243926         | 13991        | 30475        | 2819        | 82934         | 480992         | C                                                    | C        | C        | C        | C        | C        | C        | C        | C                 |
| DQB1*05:01:01                                               | 05:01:01               |           | 05:01:01G                                     | 33124        | 33774         | 995555         | 18899        | 36647        | 4154        | 49189         | 1171342        | C                                                    | C        | C        | C        | C        | C        | C        | C        | C                 |
| DQB1*05:01:01:01                                            | 05:01:01:01            | HLA00638  | 05:01:01G                                     | 881          | 60            | 2337           | 155          | 1873         | 139         | 514           | 5959           | C                                                    | I        | C        | C        | C        | C        | C        | C        | C                 |
| DQB1*05:01:01:02                                            | 05:01:01:02            | HLA06615  | 05:01:01G                                     | 0            | 0             | 11             | 47           | 0            | 0           | 1             | 59             |                                                      |          | WD       | C        |          |          |          | WD       | C                 |
| DQB1*05:01:01:03                                            | 05:01:01:03            | HLA12879  | 05:01:01G                                     | 0            | 0             | 215            | 0            | 0            | 0           | 1             | 216            |                                                      |          | I        |          |          |          |          | I        | I                 |
| DQB1*05:01:01:05                                            | 05:01:01:05            | HLA17371  | 05:01:01G                                     | 0            | 0             | 2              | 0            | 0            | 0           | 0             | 2              |                                                      |          |          |          |          |          |          |          |                   |
| DQB1*05:01:21                                               | 05:01:21               | HLA13917  | 05:01:01G                                     | 0            | 0             | 8              | 0            | 0            | 0           | 0             | 8              |                                                      |          | WD       |          |          |          |          | WD       | WD                |
| DQB1*05:01:22                                               | 05:01:22               | HLA13920  | 05:01:01G                                     | 0            | 0             | 6              | 0            | 0            | 0           | 0             | 6              |                                                      |          | WD       |          |          |          |          | WD       | WD                |
| DQB1*05:01:23                                               | 05:01:23               | HLA16151  | 05:01:01G                                     | 0            | 0             | 2              | 0            | 0            | 0           | 0             | 2              |                                                      |          |          |          |          |          |          |          |                   |
| DQB1*05:18                                                  | 05:18                  | HLA08605  | 05:01:01G                                     | 0            | 30            | 18             | 1            | 0            | 0           | 2             | 51             |                                                      | I        | WD       |          |          |          |          | WD       | I                 |
| DQB1*05:27                                                  | 05:27                  | HLA09509  | 05:01:01G                                     | 1            | 0             | 15             | 0            | 1            | 0           | 2             | 19             |                                                      |          | WD       |          |          |          |          | WD       | WD                |
| DQB1*05:31                                                  | 05:31                  | HLA09828  | 05:01:01G                                     | 0            | 0             | 23             | 1            | 0            | 0           | 1             | 25             |                                                      |          | WD       |          |          |          |          | WD       | WD                |
| DQB1*05:45                                                  | 05:45                  | HLA10236  | 05:01:01G                                     | 2            | 0             | 1              | 0            | 0            | 0           | 0             | 3              |                                                      |          |          |          |          |          |          |          |                   |
| DQB1*05:84                                                  | 05:84                  | HLA12403  | 05:01:01G                                     | 0            | 0             | 30             | 0            | 0            | 0           | 1             | 31             |                                                      |          | WD       |          |          |          |          | WD       | WD                |
| DQB1*05:103                                                 | 05:103                 | HLA13921  | 05:01:01G                                     | 1            | 0             | 38             | 0            | 3            | 0           | 6             | 48             |                                                      |          | WD       |          |          |          | WD       | WD       | WD                |
| DQB1*05:104                                                 | 05:104                 | HLA13928  | 05:01:01G                                     | 0            | 0             | 95             | 0            | 0            | 0           | 1             | 96             |                                                      |          | WD       |          |          |          |          | WD       | WD                |
| DQB1*05:107                                                 | 05:107                 | HLA13941  | 05:01:01G                                     | 0            | 0             | 4              | 0            | 3            | 0           | 2             | 9              |                                                      |          |          |          |          |          |          | WD       | WD                |
| DQB1*05:133                                                 | 05:133                 | HLA16053  | 05:01:01G                                     | 0            | 0             | 8              | 0            | 0            | 0           | 0             | 8              |                                                      |          | WD       |          |          |          |          | WD       | WD                |
| DQB1*05:137                                                 | 05:137                 | HLA16161  | 05:01:01G                                     | 0            | 0             | 0              | 0            | 0            | 0           | 1             | 1              |                                                      |          |          |          |          |          |          |          |                   |
| DQB1*05:144                                                 | 05:144                 | HLA16645  | 05:01:01G                                     | 0            | 1             | 0              | 0            | 0            | 0           | 1             | 2              |                                                      |          |          |          |          |          |          |          |                   |
| DQB1*05:152                                                 | 05:152                 | HLA17344  | 05:01:01G                                     | 0            | 0             | 1              | 0            | 0            | 0           | 0             | 1              |                                                      |          |          |          |          |          |          |          |                   |
| DQB1*05:01:02                                               | 05:01:02               | HLA01086  |                                               | 0            | 0             | 5              | 2            | 0            | 0           | 0             | 7              |                                                      |          | WD       |          |          |          |          | WD       | WD                |
| DQB1*05:01:03                                               | 05:01:03               | HLA05548  |                                               | 1            | 0             | 4              | 0            | 0            | 0           | 1             | 6              |                                                      |          |          |          |          |          |          | WD       | WD                |

| Supplemental Table 15: HLA-DQB1 Allele Summary <sup>a</sup> |                        |           | Allele Count by Population Group <sup>b</sup> |              |              |               |              |              |             |              |               | 3.0.0 CIWD Category by Population Group <sup>c</sup> |          |          |          |          |          |          |          |                   |
|-------------------------------------------------------------|------------------------|-----------|-----------------------------------------------|--------------|--------------|---------------|--------------|--------------|-------------|--------------|---------------|------------------------------------------------------|----------|----------|----------|----------|----------|----------|----------|-------------------|
| Allele                                                      | Genomic Typing         | Allele ID | G group                                       | AFA          | API          | EURO          | MENA         | HIS          | NAM         | UNK          | Total         | AFA                                                  | API      | EURO     | MENA     | HIS      | NAM      | UNK      | Total    | Highest Frequency |
| DQB1*05:01:04                                               | 05:01:04               | HLA09293  |                                               | 0            | 0            | 0             | 1            | 0            | 0           | 0            | 1             |                                                      |          |          |          |          |          |          |          |                   |
| DQB1*05:01:05                                               | 05:01:05               | HLA09295  |                                               | 0            | 0            | 54            | 0            | 0            | 0           | 10           | 64            |                                                      |          | WD       |          |          |          | WD       | WD       | WD                |
| DQB1*05:01:06                                               | 05:01:06               | HLA09296  |                                               | 0            | 0            | 2             | 0            | 0            | 0           | 3            | 5             |                                                      |          |          |          |          |          |          | WD       | WD                |
| DQB1*05:01:07                                               | 05:01:07               | HLA09297  |                                               | 0            | 0            | 12            | 0            | 0            | 0           | 0            | 12            |                                                      |          | WD       |          |          |          |          | WD       | WD                |
| DQB1*05:01:08                                               | 05:01:08               | HLA09347  |                                               | 0            | 0            | 30            | 0            | 0            | 0           | 11           | 41            |                                                      |          | WD       |          |          |          | WD       | WD       | WD                |
| DQB1*05:01:09                                               | 05:01:09               | HLA09827  |                                               | 0            | 2            | 3             | 0            | 0            | 0           | 0            | 5             |                                                      |          |          |          |          |          |          | WD       | WD                |
| DQB1*05:01:12                                               | 05:01:12               | HLA11145  |                                               | 0            | 9            | 4             | 0            | 0            | 0           | 2            | 15            |                                                      | WD       |          |          |          |          |          | WD       | WD                |
| DQB1*05:01:15                                               | 05:01:15               | HLA11596  |                                               | 0            | 0            | 1             | 0            | 0            | 0           | 0            | 1             |                                                      |          |          |          |          |          |          |          |                   |
| DQB1*05:01:16                                               | 05:01:16               | HLA11679  |                                               | 0            | 1            | 1             | 0            | 0            | 0           | 0            | 2             |                                                      |          |          |          |          |          |          |          |                   |
| DQB1*05:01:17                                               | 05:01:17               | HLA11684  |                                               | 0            | 0            | 4             | 0            | 0            | 0           | 0            | 4             |                                                      |          |          |          |          |          |          |          |                   |
| <b>DQB1*05:02 total</b>                                     | <b>05:02 total</b>     |           |                                               | <b>10716</b> | <b>64280</b> | <b>352764</b> | <b>22320</b> | <b>10427</b> | <b>1070</b> | <b>29445</b> | <b>491022</b> | <b>C</b>                                             | <b>C</b> | <b>C</b> | <b>C</b> | <b>C</b> | <b>C</b> | <b>C</b> | <b>C</b> | <b>C</b>          |
| DQB1*05:02                                                  | 05:02                  |           |                                               | 659          | 1893         | 28653         | 1679         | 344          | 72          | 1443         | 34743         | C                                                    | C        | C        | C        | C        | C        | C        | C        | C                 |
| DQB1*05:02P                                                 | 05:02P                 |           |                                               | 0            | 0            | 9             | 0            | 0            | 0           | 0            | 9             |                                                      |          | WD       |          |          |          |          | WD       | WD                |
| <b>DQB1*05:02:01G total</b>                                 | <b>05:02:01G total</b> |           |                                               | <b>10056</b> | <b>62305</b> | <b>324086</b> | <b>20641</b> | <b>10083</b> | <b>998</b>  | <b>27998</b> | <b>456167</b> | <b>C</b>                                             | <b>C</b> | <b>C</b> | <b>C</b> | <b>C</b> | <b>C</b> | <b>C</b> | <b>C</b> | <b>C</b>          |
| DQB1*05:02:01G                                              | 05:02:01G              |           | 05:02:01G                                     | 5698         | 40810        | 93432         | 6328         | 6072         | 620         | 20133        | 173093        | C                                                    | C        | C        | C        | C        | C        | C        | C        | C                 |
| DQB1*05:02:01                                               | 05:02:01               |           | 05:02:01G                                     | 4357         | 21492        | 230381        | 14300        | 4010         | 378         | 7861         | 282779        | C                                                    | C        | C        | C        | C        | C        | C        | C        | C                 |
| DQB1*05:02:01:01                                            | 05:02:01:01            | HLA00639  | 05:02:01G                                     | 0            | 0            | 11            | 0            | 0            | 0           | 0            | 11            |                                                      |          | WD       |          |          |          |          | WD       | WD                |
| DQB1*05:02:07                                               | 05:02:07               | HLA09843  | 05:02:01G                                     | 1            | 0            | 165           | 8            | 1            | 0           | 3            | 178           |                                                      |          | I        | WD       |          |          |          | I        | I                 |
| DQB1*05:02:11                                               | 05:02:11               | HLA12699  | 05:02:01G                                     | 0            | 0            | 25            | 0            | 0            | 0           | 0            | 25            |                                                      |          | WD       |          |          |          |          | WD       | WD                |
| DQB1*05:14                                                  | 05:14                  | HLA07330  | 05:02:01G                                     | 0            | 0            | 59            | 1            | 0            | 0           | 0            | 60            |                                                      |          | WD       |          |          |          |          | WD       | WD                |
| DQB1*05:35                                                  | 05:35                  | HLA09838  | 05:02:01G                                     | 0            | 1            | 2             | 2            | 0            | 0           | 0            | 5             |                                                      |          |          |          |          |          |          | WD       | WD                |
| DQB1*05:37                                                  | 05:37                  | HLA09841  | 05:02:01G                                     | 0            | 2            | 0             | 0            | 0            | 0           | 0            | 2             |                                                      |          |          |          |          |          |          |          |                   |
| DQB1*05:46                                                  | 05:46                  | HLA10238  | 05:02:01G                                     | 0            | 0            | 2             | 0            | 0            | 0           | 0            | 2             |                                                      |          |          |          |          |          |          |          |                   |
| DQB1*05:57                                                  | 05:57                  | HLA11080  | 05:02:01G                                     | 0            | 0            | 2             | 0            | 0            | 0           | 0            | 2             |                                                      |          |          |          |          |          |          |          |                   |
| DQB1*05:102                                                 | 05:102                 | HLA13915  | 05:02:01G                                     | 0            | 0            | 2             | 2            | 0            | 0           | 0            | 4             |                                                      |          |          |          |          |          |          |          |                   |
| DQB1*05:106                                                 | 05:106                 | HLA13937  | 05:02:01G                                     | 0            | 0            | 5             | 0            | 0            | 0           | 1            | 6             |                                                      |          | WD       |          |          |          |          | WD       | WD                |
| DQB1*05:02:02                                               | 05:02:02               | HLA01573  |                                               | 1            | 80           | 4             | 0            | 0            | 0           | 4            | 89            |                                                      | I        |          |          |          |          |          | WD       | I                 |
| DQB1*05:02:04                                               | 05:02:04               | HLA09348  |                                               | 0            | 1            | 7             | 0            | 0            | 0           | 0            | 8             |                                                      |          | WD       |          |          |          |          | WD       | WD                |
| DQB1*05:02:06                                               | 05:02:06               | HLA09832  |                                               | 0            | 0            | 1             | 0            | 0            | 0           | 0            | 1             |                                                      |          |          |          |          |          |          |          |                   |
| DQB1*05:02:09                                               | 05:02:09               | HLA11597  |                                               | 0            | 0            | 4             | 0            | 0            | 0           | 0            | 4             |                                                      |          |          |          |          |          |          |          |                   |
| DQB1*05:02:10                                               | 05:02:10               | HLA12033  |                                               | 0            | 1            | 0             | 0            | 0            | 0           | 0            | 1             |                                                      |          |          |          |          |          |          |          |                   |

| Supplemental Table 15: HLA-DQB1 Allele Summary <sup>a</sup> |                        |           | Allele Count by Population Group <sup>b</sup> |             |               |               |              |              |             |              |               | 3.0.0 CIWD Category by Population Group <sup>c</sup> |           |           |      |     |     |     |           |                   |
|-------------------------------------------------------------|------------------------|-----------|-----------------------------------------------|-------------|---------------|---------------|--------------|--------------|-------------|--------------|---------------|------------------------------------------------------|-----------|-----------|------|-----|-----|-----|-----------|-------------------|
| Allele                                                      | Genomic Typing         | Allele ID | G group                                       | AFA         | API           | EURO          | MENA         | HIS          | NAM         | UNK          | Total         | AFA                                                  | API       | EURO      | MENA | HIS | NAM | UNK | Total     | Highest Frequency |
| <b>DQB1*05:03 total</b>                                     | <b>05:03 total</b>     |           |                                               | <b>6020</b> | <b>115198</b> | <b>310749</b> | <b>19944</b> | <b>13227</b> | <b>1445</b> | <b>36482</b> | <b>503065</b> | C                                                    | C         | C         | C    | C   | C   | C   | C         | C                 |
| DQB1*05:03                                                  | 05:03                  |           |                                               | 10          | 144           | 10072         | 1460         | 20           | 0           | 253          | 11959         | WD                                                   | C         | C         | C    | I   |     | C   | C         | C                 |
| DQB1*05:03P                                                 | 05:03P                 |           |                                               | 0           | 1             | 15            | 0            | 0            | 0           | 1            | 17            |                                                      |           | WD        |      |     |     |     | WD        | WD                |
| <b>DQB1*05:03:01G total</b>                                 | <b>05:03:01G total</b> |           |                                               | <b>6010</b> | <b>114972</b> | <b>300607</b> | <b>18483</b> | <b>13207</b> | <b>1445</b> | <b>36225</b> | <b>490949</b> | C                                                    | C         | C         | C    | C   | C   | C   | C         | C                 |
| DQB1*05:03:01G                                              | 05:03:01G              |           | 05:03:01G                                     | 3406        | 90866         | 105970        | 6114         | 8023         | 971         | 27857        | 243207        | C                                                    | C         | C         | C    | C   | C   | C   | C         | C                 |
| DQB1*05:03:01                                               | 05:03:01               |           | 05:03:01G                                     | 2602        | 23898         | 194525        | 12360        | 5184         | 470         | 8351         | 247390        | C                                                    | C         | C         | C    | C   | C   | C   | C         | C                 |
| DQB1*05:03:01:01                                            | 05:03:01:01            | HLA00640  | 05:03:01G                                     | 0           | 0             | 18            | 0            | 0            | 0           | 0            | 18            |                                                      |           | WD        |      |     |     |     | WD        | WD                |
| DQB1*05:03:01:02                                            | 05:03:01:02            | HLA06622  | 05:03:01G                                     | 0           | 0             | 1             | 0            | 0            | 0           | 0            | 1             |                                                      |           |           |      |     |     |     |           |                   |
| DQB1*05:03:03                                               | 05:03:03               | HLA05769  | 05:03:01G                                     | 0           | 5             | 3             | 0            | 0            | 0           | 0            | 8             |                                                      | WD        |           |      |     |     |     | WD        | WD                |
| DQB1*05:03:09                                               | 05:03:09               | HLA09876  | 05:03:01G                                     | 0           | 0             | 6             | 0            | 0            | 0           | 0            | 6             |                                                      |           | WD        |      |     |     |     | WD        | WD                |
| DQB1*05:08                                                  | 05:08                  | HLA05775  | 05:03:01G                                     | 0           | 14            | 23            | 1            | 0            | 0           | 2            | 40            |                                                      | I         | WD        |      |     |     |     | WD        | I                 |
| DQB1*05:10                                                  | 05:10                  | HLA06035  | 05:03:01G                                     | 2           | 189           | 10            | 1            | 0            | 4           | 15           | 221           |                                                      | C         | WD        |      |     |     | I   | I         | C                 |
| DQB1*05:78                                                  | 05:78                  | HLA12160  | 05:03:01G                                     | 0           | 0             | 49            | 0            | 0            | 0           | 0            | 49            |                                                      |           | WD        |      |     |     |     | WD        | WD                |
| DQB1*05:96                                                  | 05:96                  | HLA13710  | 05:03:01G                                     | 0           | 0             | 1             | 0            | 0            | 0           | 0            | 1             |                                                      |           |           |      |     |     |     |           |                   |
| DQB1*05:108                                                 | 05:108                 | HLA13942  | 05:03:01G                                     | 0           | 0             | 1             | 7            | 0            | 0           | 0            | 8             |                                                      |           |           | WD   |     |     |     | WD        | WD                |
| DQB1*05:03:02                                               | 05:03:02               | HLA00641  |                                               | 0           | 1             | 25            | 0            | 0            | 0           | 0            | 26            |                                                      |           | WD        |      |     |     |     | WD        | WD                |
| DQB1*05:03:05                                               | 05:03:05               | HLA06823  |                                               | 0           | 0             | 1             | 0            | 0            | 0           | 0            | 1             |                                                      |           |           |      |     |     |     |           |                   |
| DQB1*05:03:06                                               | 05:03:06               | HLA09349  |                                               | 0           | 0             | 1             | 0            | 0            | 0           | 0            | 1             |                                                      |           |           |      |     |     |     |           |                   |
| DQB1*05:03:08                                               | 05:03:08               | HLA09744  |                                               | 0           | 47            | 0             | 0            | 0            | 0           | 0            | 47            |                                                      | I         |           |      |     |     |     | WD        | I                 |
| DQB1*05:03:11                                               | 05:03:11               | HLA10553  |                                               | 0           | 0             | 11            | 1            | 0            | 0           | 2            | 14            |                                                      |           | WD        |      |     |     |     | WD        | WD                |
| DQB1*05:03:12                                               | 05:03:12               | HLA11146  |                                               | 0           | 9             | 0             | 0            | 0            | 0           | 0            | 9             |                                                      | WD        |           |      |     |     |     | WD        | WD                |
| DQB1*05:03:13                                               | 05:03:13               | HLA11148  |                                               | 0           | 9             | 0             | 0            | 0            | 0           | 0            | 9             |                                                      | WD        |           |      |     |     |     | WD        | WD                |
| DQB1*05:03:14                                               | 05:03:14               | HLA11594  |                                               | 0           | 1             | 1             | 0            | 0            | 0           | 1            | 3             |                                                      |           |           |      |     |     |     |           |                   |
| DQB1*05:03:16                                               | 05:03:16               | HLA11890  |                                               | 0           | 1             | 0             | 0            | 0            | 0           | 0            | 1             |                                                      |           |           |      |     |     |     |           |                   |
| <b>DQB1*05:43 total</b>                                     | <b>05:43 total</b>     |           |                                               | <b>0</b>    | <b>13</b>     | <b>16</b>     | <b>0</b>     | <b>0</b>     | <b>0</b>    | <b>0</b>     | <b>29</b>     |                                                      | <b>WD</b> | <b>WD</b> |      |     |     |     | <b>WD</b> | <b>WD</b>         |
| DQB1*05:43                                                  | 05:43                  |           |                                               | 0           | 12            | 13            | 0            | 0            | 0           | 0            | 25            |                                                      | WD        | WD        |      |     |     |     | WD        | WD                |
| DQB1*05:43:01                                               | 05:43:01               | HLA09833  |                                               | 0           | 1             | 2             | 0            | 0            | 0           | 0            | 3             |                                                      |           |           |      |     |     |     |           |                   |
| DQB1*05:43:02                                               | 05:43:02               | HLA16144  |                                               | 0           | 0             | 1             | 0            | 0            | 0           | 0            | 1             |                                                      |           |           |      |     |     |     |           |                   |
| <b>DQB1*05:04 total</b>                                     | <b>05:04 total</b>     |           |                                               | <b>157</b>  | <b>269</b>    | <b>18718</b>  | <b>520</b>   | <b>342</b>   | <b>49</b>   | <b>1190</b>  | <b>21245</b>  | C                                                    | C         | C         | C    | C   | C   | C   | C         | C                 |
| <b>DQB1*05:04:01G total</b>                                 | <b>05:04:01G total</b> |           |                                               | <b>157</b>  | <b>269</b>    | <b>18718</b>  | <b>520</b>   | <b>342</b>   | <b>49</b>   | <b>1190</b>  | <b>21245</b>  | C                                                    | C         | C         | C    | C   | C   | C   | C         | C                 |
| DQB1*05:04                                                  | 05:04                  | HLA00642  | 05:04:01G                                     | 156         | 240           | 18628         | 519          | 328          | 49          | 1149         | 21069         | C                                                    | C         | C         | C    | C   | C   | C   | C         | C                 |



| Supplemental Table 15: HLA-DQB1 Allele Summary <sup>a</sup> |                    |           | Allele Count by Population Group <sup>b</sup> |          |          |           |           |          |          |          |           | 3.0.0 CIWD Category by Population Group <sup>c</sup> |           |           |           |     |     |           |           |                   |
|-------------------------------------------------------------|--------------------|-----------|-----------------------------------------------|----------|----------|-----------|-----------|----------|----------|----------|-----------|------------------------------------------------------|-----------|-----------|-----------|-----|-----|-----------|-----------|-------------------|
| Allele                                                      | Genomic Typing     | Allele ID | G group                                       | AFA      | API      | EURO      | MENA      | HIS      | NAM      | UNK      | Total     | AFA                                                  | API       | EURO      | MENA      | HIS | NAM | UNK       | Total     | Highest Frequency |
| DQB1*05:04:01G                                              | 05:04:01G          |           | 05:04:01G                                     | 1        | 29       | 81        | 1         | 14       | 0        | 41       | 167       |                                                      | I         | WD        |           | I   |     | I         | I         | I                 |
| DQB1*05:132Q                                                | 05:132Q            | HLA16014  | 05:04:01G                                     | 0        | 0        | 9         | 0         | 0        | 0        | 0        | 9         |                                                      |           | WD        |           |     |     |           | WD        | WD                |
| <b>DQB1*05:05 total</b>                                     | <b>05:05 total</b> |           |                                               | <b>3</b> | <b>0</b> | <b>72</b> | <b>11</b> | <b>0</b> | <b>0</b> | <b>5</b> | <b>91</b> |                                                      |           | <b>WD</b> | <b>WD</b> |     |     | <b>WD</b> | <b>WD</b> | <b>WD</b>         |
| DQB1*05:05                                                  | 05:05              |           |                                               | 2        | 0        | 18        | 3         | 0        | 0        | 2        | 25        |                                                      |           | WD        |           |     |     |           | WD        | WD                |
| DQB1*05:05:01                                               | 05:05:01           | HLA02689  |                                               | 1        | 0        | 54        | 8         | 0        | 0        | 3        | 66        |                                                      |           | WD        | WD        |     |     |           | WD        | WD                |
| <b>DQB1*05:06 total</b>                                     | <b>05:06 total</b> |           |                                               | <b>0</b> | <b>5</b> | <b>0</b>  | <b>0</b>  | <b>0</b> | <b>0</b> | <b>4</b> | <b>9</b>  |                                                      | <b>WD</b> |           |           |     |     |           | <b>WD</b> | <b>WD</b>         |
| DQB1*05:06:01                                               | 05:06:01           | HLA05383  |                                               | 0        | 3        | 0         | 0         | 0        | 0        | 0        | 3         |                                                      |           |           |           |     |     |           |           |                   |
| DQB1*05:06:02                                               | 05:06:02           | HLA11592  |                                               | 0        | 2        | 0         | 0         | 0        | 0        | 4        | 6         |                                                      |           |           |           |     |     |           | WD        | WD                |
| DQB1*05:07                                                  | 05:07              | HLA05772  |                                               | 0        | 0        | 1         | 0         | 0        | 0        | 0        | 1         |                                                      |           |           |           |     |     |           |           |                   |
| DQB1*05:09                                                  | 05:09              | HLA06034  |                                               | 0        | 3        | 9         | 0         | 0        | 0        | 0        | 12        |                                                      |           | WD        |           |     |     |           | WD        | WD                |
| <b>DQB1*05:11 total</b>                                     | <b>05:11 total</b> |           |                                               | <b>0</b> | <b>0</b> | <b>56</b> | <b>1</b>  | <b>2</b> | <b>0</b> | <b>4</b> | <b>63</b> |                                                      |           | <b>WD</b> |           |     |     |           | <b>WD</b> | <b>WD</b>         |
| DQB1*05:11                                                  | 05:11              |           |                                               | 0        | 0        | 8         | 0         | 0        | 0        | 0        | 8         |                                                      |           | WD        |           |     |     |           | WD        | WD                |
| DQB1*05:11:01                                               | 05:11:01           | HLA06287  |                                               | 0        | 0        | 5         | 0         | 0        | 0        | 0        | 5         |                                                      |           | WD        |           |     |     |           | WD        | WD                |
| DQB1*05:11:02                                               | 05:11:02           | HLA10288  |                                               | 0        | 0        | 43        | 1         | 2        | 0        | 4        | 50        |                                                      |           | WD        |           |     |     |           | WD        | WD                |
| DQB1*05:12                                                  | 05:12              | HLA06670  |                                               | 0        | 0        | 37        | 0         | 0        | 0        | 2        | 39        |                                                      |           | WD        |           |     |     |           | WD        | WD                |
| DQB1*05:15                                                  | 05:15              | HLA07929  |                                               | 0        | 0        | 1         | 0         | 0        | 0        | 0        | 1         |                                                      |           |           |           |     |     |           |           |                   |
| DQB1*05:16                                                  | 05:16              | HLA08292  |                                               | 0        | 0        | 2         | 1         | 0        | 0        | 0        | 3         |                                                      |           |           |           |     |     |           |           |                   |
| DQB1*05:19                                                  | 05:19              | HLA09102  |                                               | 3        | 0        | 1         | 0         | 0        | 0        | 0        | 4         |                                                      |           |           |           |     |     |           |           |                   |
| DQB1*05:20                                                  | 05:20              | HLA09291  |                                               | 0        | 0        | 37        | 0         | 1        | 0        | 3        | 41        |                                                      |           | WD        |           |     |     |           | WD        | WD                |
| DQB1*05:23                                                  | 05:23              | HLA09351  |                                               | 0        | 486      | 2         | 1         | 0        | 0        | 2        | 491       |                                                      | C         |           |           |     |     |           | I         | C                 |
| DQB1*05:24                                                  | 05:24              | HLA09352  |                                               | 4        | 0        | 0         | 0         | 0        | 0        | 0        | 4         |                                                      |           |           |           |     |     |           |           |                   |
| DQB1*05:26                                                  | 05:26              | HLA09354  |                                               | 0        | 8        | 0         | 0         | 1        | 0        | 1        | 10        |                                                      | WD        |           |           |     |     |           | WD        | WD                |
| DQB1*05:28                                                  | 05:28              | HLA09743  |                                               | 0        | 1        | 3         | 0         | 0        | 0        | 0        | 4         |                                                      |           |           |           |     |     |           |           |                   |
| DQB1*05:29                                                  | 05:29              | HLA09826  |                                               | 0        | 3        | 0         | 0         | 0        | 0        | 0        | 3         |                                                      |           |           |           |     |     |           |           |                   |
| DQB1*05:34                                                  | 05:34              | HLA09836  |                                               | 0        | 4        | 0         | 0         | 0        | 0        | 1        | 5         |                                                      |           |           |           |     |     |           | WD        | WD                |
| DQB1*05:44                                                  | 05:44              | HLA10112  |                                               | 0        | 1        | 2         | 0         | 1        | 0        | 1        | 5         |                                                      |           |           |           |     |     |           | WD        | WD                |
| DQB1*05:48                                                  | 05:48              | HLA10289  |                                               | 0        | 0        | 0         | 1         | 0        | 0        | 0        | 1         |                                                      |           |           |           |     |     |           |           |                   |
| DQB1*05:49                                                  | 05:49              | HLA10290  |                                               | 0        | 0        | 19        | 0         | 0        | 0        | 4        | 23        |                                                      |           | WD        |           |     |     |           | WD        | WD                |
| DQB1*05:51                                                  | 05:51              | HLA10544  |                                               | 0        | 0        | 5         | 0         | 0        | 0        | 2        | 7         |                                                      |           | WD        |           |     |     |           | WD        | WD                |
| DQB1*05:52                                                  | 05:52              | HLA10549  |                                               | 0        | 0        | 46        | 1         | 0        | 0        | 2        | 49        |                                                      |           | WD        |           |     |     |           | WD        | WD                |
| DQB1*05:53                                                  | 05:53              | HLA10550  |                                               | 0        | 0        | 1         | 0         | 0        | 0        | 0        | 1         |                                                      |           |           |           |     |     |           |           |                   |

| Supplemental Table 15: HLA-DQB1 Allele Summary <sup>a</sup> |                    |           | Allele Count by Population Group <sup>b</sup> |          |          |          |          |          |          |          |          |     | 3.0.0 CIWD Category by Population Group <sup>c</sup> |      |      |     |     |     |       |                   |
|-------------------------------------------------------------|--------------------|-----------|-----------------------------------------------|----------|----------|----------|----------|----------|----------|----------|----------|-----|------------------------------------------------------|------|------|-----|-----|-----|-------|-------------------|
| Allele                                                      | Genomic Typing     | Allele ID | G group                                       | AFA      | API      | EURO     | MENA     | HIS      | NAM      | UNK      | Total    | AFA | API                                                  | EURO | MENA | HIS | NAM | UNK | Total | Highest Frequency |
| DQB1*05:54                                                  | 05:54              | HLA10551  |                                               | 0        | 0        | 1        | 0        | 0        | 0        | 0        | 1        |     |                                                      |      |      |     |     |     |       |                   |
| DQB1*05:55                                                  | 05:55              | HLA10552  |                                               | 0        | 0        | 1        | 0        | 0        | 0        | 0        | 1        |     |                                                      |      |      |     |     |     |       |                   |
| DQB1*05:58                                                  | 05:58              | HLA11147  |                                               | 5        | 0        | 0        | 0        | 0        | 0        | 0        | 5        | WD  |                                                      |      |      |     |     |     | WD    | WD                |
| DQB1*05:59                                                  | 05:59              | HLA11149  |                                               | 0        | 1        | 0        | 0        | 0        | 0        | 0        | 1        |     |                                                      |      |      |     |     |     |       |                   |
| DQB1*05:60                                                  | 05:60              | HLA11557  |                                               | 0        | 0        | 7        | 0        | 0        | 0        | 3        | 10       |     |                                                      | WD   |      |     |     |     | WD    | WD                |
| DQB1*05:62                                                  | 05:62              | HLA11157  |                                               | 0        | 0        | 1        | 0        | 0        | 0        | 0        | 1        |     |                                                      |      |      |     |     |     |       |                   |
| DQB1*05:64                                                  | 05:64              | HLA11284  |                                               | 0        | 1        | 0        | 0        | 0        | 0        | 0        | 1        |     |                                                      |      |      |     |     |     |       |                   |
| <b>DQB1*05:66 total</b>                                     | <b>05:66 total</b> |           |                                               | <b>0</b> | <b>3</b> | <b>0</b> | <b>1</b> | <b>0</b> | <b>0</b> | <b>0</b> | <b>4</b> |     |                                                      |      |      |     |     |     |       |                   |
| DQB1*05:66                                                  | 05:66              |           |                                               | 0        | 1        | 0        | 0        | 0        | 0        | 0        | 1        |     |                                                      |      |      |     |     |     |       |                   |
| DQB1*05:66:01                                               | 05:66:01           | HLA11359  |                                               | 0        | 2        | 0        | 0        | 0        | 0        | 0        | 2        |     |                                                      |      |      |     |     |     |       |                   |
| DQB1*05:66:02                                               | 05:66:02           | HLA14215  |                                               | 0        | 0        | 0        | 1        | 0        | 0        | 0        | 1        |     |                                                      |      |      |     |     |     |       |                   |
| DQB1*05:67                                                  | 05:67              | HLA11361  |                                               | 0        | 10       | 1        | 1        | 3        | 1        | 4        | 20       |     | WD                                                   |      |      |     |     |     | WD    | WD                |
| DQB1*05:69                                                  | 05:69              | HLA11595  |                                               | 0        | 0        | 14       | 0        | 0        | 0        | 0        | 14       |     |                                                      | WD   |      |     |     |     | WD    | WD                |
| DQB1*05:71                                                  | 05:71              | HLA11681  |                                               | 2        | 0        | 0        | 0        | 0        | 0        | 0        | 2        |     |                                                      |      |      |     |     |     |       |                   |
| DQB1*05:72                                                  | 05:72              | HLA11682  |                                               | 0        | 0        | 0        | 0        | 3        | 0        | 0        | 3        |     |                                                      |      |      |     |     |     |       |                   |
| DQB1*05:73                                                  | 05:73              | HLA11683  |                                               | 0        | 0        | 0        | 0        | 1        | 0        | 0        | 1        |     |                                                      |      |      |     |     |     |       |                   |
| DQB1*05:79                                                  | 05:79              | HLA12204  |                                               | 0        | 0        | 7        | 1        | 0        | 1        | 0        | 9        |     |                                                      | WD   |      |     |     |     | WD    | WD                |
| DQB1*05:80                                                  | 05:80              | HLA12212  |                                               | 3        | 2        | 0        | 1        | 0        | 0        | 1        | 7        |     |                                                      |      |      |     |     |     | WD    | WD                |
| DQB1*05:83                                                  | 05:83              | HLA12358  |                                               | 0        | 0        | 3        | 0        | 0        | 0        | 0        | 3        |     |                                                      |      |      |     |     |     |       |                   |
| DQB1*05:88                                                  | 05:88              | HLA12801  |                                               | 5        | 0        | 0        | 0        | 0        | 0        | 0        | 5        | WD  |                                                      |      |      |     |     |     | WD    | WD                |
| <b>DQB1*05:89 total</b>                                     | <b>05:89 total</b> |           |                                               | <b>0</b> | <b>0</b> | <b>0</b> | <b>0</b> | <b>0</b> | <b>0</b> | <b>2</b> | <b>2</b> |     |                                                      |      |      |     |     |     |       |                   |
| DQB1*05:89:02                                               | 05:89:02           | HLA14347  |                                               | 0        | 0        | 0        | 0        | 0        | 0        | 2        | 2        |     |                                                      |      |      |     |     |     |       |                   |
| DQB1*05:91                                                  | 05:91              | HLA13143  |                                               | 0        | 2        | 0        | 0        | 0        | 0        | 0        | 2        |     |                                                      |      |      |     |     |     |       |                   |
| DQB1*05:92                                                  | 05:92              | HLA13144  |                                               | 0        | 0        | 4        | 0        | 0        | 0        | 0        | 4        |     |                                                      |      |      |     |     |     |       |                   |
| DQB1*05:93                                                  | 05:93              | HLA13577  |                                               | 0        | 0        | 2        | 0        | 0        | 0        | 0        | 2        |     |                                                      |      |      |     |     |     |       |                   |
| DQB1*05:94                                                  | 05:94              | HLA13582  |                                               | 0        | 2        | 0        | 0        | 0        | 0        | 0        | 2        |     |                                                      |      |      |     |     |     |       |                   |
| DQB1*05:95                                                  | 05:95              | HLA13683  |                                               | 0        | 1        | 0        | 0        | 0        | 0        | 0        | 1        |     |                                                      |      |      |     |     |     |       |                   |
| DQB1*05:97                                                  | 05:97              | HLA13811  |                                               | 0        | 0        | 2        | 0        | 0        | 0        | 0        | 2        |     |                                                      |      |      |     |     |     |       |                   |
| DQB1*05:98                                                  | 05:98              | HLA13812  |                                               | 0        | 0        | 1        | 0        | 0        | 0        | 0        | 1        |     |                                                      |      |      |     |     |     |       |                   |
| DQB1*05:101                                                 | 05:101             | HLA13885  |                                               | 0        | 4        | 0        | 0        | 0        | 0        | 0        | 4        |     |                                                      |      |      |     |     |     |       |                   |
| DQB1*05:105                                                 | 05:105             | HLA13935  |                                               | 0        | 0        | 2        | 0        | 0        | 0        | 0        | 2        |     |                                                      |      |      |     |     |     |       |                   |

| Supplemental Table 15: HLA-DQB1 Allele Summary <sup>a</sup> |                        |           | Allele Count by Population Group <sup>b</sup> |              |               |                |              |              |             |               |                | 3.0.0 CIWD Category by Population Group <sup>c</sup> |          |          |          |          |          |          |          |                   |
|-------------------------------------------------------------|------------------------|-----------|-----------------------------------------------|--------------|---------------|----------------|--------------|--------------|-------------|---------------|----------------|------------------------------------------------------|----------|----------|----------|----------|----------|----------|----------|-------------------|
| Allele                                                      | Genomic Typing         | Allele ID | G group                                       | AFA          | API           | EURO           | MENA         | HIS          | NAM         | UNK           | Total          | AFA                                                  | API      | EURO     | MENA     | HIS      | NAM      | UNK      | Total    | Highest Frequency |
| DQB1*05:111                                                 | 05:111                 | HLA14349  |                                               | 1            | 0             | 0              | 0            | 0            | 0           | 0             | 1              |                                                      |          |          |          |          |          |          |          |                   |
| DQB1*05:113                                                 | 05:113                 | HLA14551  |                                               | 0            | 1             | 0              | 0            | 0            | 0           | 0             | 1              |                                                      |          |          |          |          |          |          |          |                   |
| DQB1*05:115                                                 | 05:115                 | HLA14553  |                                               | 0            | 1             | 0              | 0            | 0            | 0           | 0             | 1              |                                                      |          |          |          |          |          |          |          |                   |
| DQB1*05:116                                                 | 05:116                 | HLA14554  |                                               | 0            | 2             | 0              | 0            | 0            | 0           | 0             | 2              |                                                      |          |          |          |          |          |          |          |                   |
| DQB1*05:119                                                 | 05:119                 | HLA14557  |                                               | 0            | 0             | 1              | 0            | 0            | 0           | 0             | 1              |                                                      |          |          |          |          |          |          |          |                   |
| DQB1*05:120                                                 | 05:120                 | HLA15317  |                                               | 0            | 1             | 0              | 0            | 0            | 0           | 0             | 1              |                                                      |          |          |          |          |          |          |          |                   |
| DQB1*05:135                                                 | 05:135                 | HLA16142  |                                               | 0            | 0             | 2              | 0            | 0            | 0           | 0             | 2              |                                                      |          |          |          |          |          |          |          |                   |
| DQB1*05:140                                                 | 05:140                 | HLA16566  |                                               | 0            | 1             | 0              | 0            | 0            | 0           | 0             | 1              |                                                      |          |          |          |          |          |          |          |                   |
| DQB1*05:158                                                 | 05:158                 | HLA17917  |                                               | 0            | 4             | 0              | 0            | 0            | 0           | 0             | 4              |                                                      |          |          |          |          |          |          |          |                   |
| DQB1*05:CODE                                                | 05:CODE                |           |                                               | 2828         | 3532          | 41466          | 944          | 2537         | 136         | 4809          | 56252          | NA                                                   | NA       | NA       | NA       | NA       | NA       | NA       | NA       | NA                |
| <b>DQB1*06:01 total</b>                                     | <b>06:01 total</b>     |           |                                               | <b>1045</b>  | <b>203718</b> | <b>98834</b>   | <b>15933</b> | <b>7633</b>  | <b>955</b>  | <b>22633</b>  | <b>350751</b>  | <b>C</b>                                             | <b>C</b> | <b>C</b> | <b>C</b> | <b>C</b> | <b>C</b> | <b>C</b> | <b>C</b> | <b>C</b>          |
| DQB1*06:01                                                  | 06:01                  |           |                                               | 576          | 41387         | 55148          | 6196         | 4048         | 546         | 7452          | 115353         | C                                                    | C        | C        | C        | C        | C        | C        | C        | C                 |
| DQB1*06:01P                                                 | 06:01P                 |           |                                               | 0            | 0             | 1              | 0            | 0            | 0           | 1             | 2              |                                                      |          |          |          |          |          |          |          |                   |
| <b>DQB1*06:01:01G total</b>                                 | <b>06:01:01G total</b> |           |                                               | <b>469</b>   | <b>162216</b> | <b>43676</b>   | <b>9730</b>  | <b>3585</b>  | <b>409</b>  | <b>15175</b>  | <b>235260</b>  | <b>C</b>                                             | <b>C</b> | <b>C</b> | <b>C</b> | <b>C</b> | <b>C</b> | <b>C</b> | <b>C</b> | <b>C</b>          |
| DQB1*06:01:01G                                              | 06:01:01G              |           | 06:01:01G                                     | 318          | 153769        | 20048          | 5358         | 3231         | 367         | 14100         | 197191         | C                                                    | C        | C        | C        | C        | C        | C        | C        | C                 |
| DQB1*06:01:01                                               | 06:01:01               |           | 06:01:01G                                     | 129          | 8300          | 22698          | 4323         | 342          | 41          | 925           | 36758          | C                                                    | C        | C        | C        | C        | C        | C        | C        | C                 |
| DQB1*06:01:03                                               | 06:01:03               | HLA00645  | 06:01:01G                                     | 22           | 5             | 909            | 47           | 12           | 1           | 51            | 1047           | WD                                                   | WD       | I        | C        | I        |          | I        | I        | C                 |
| DQB1*06:01:05                                               | 06:01:05               | HLA03991  | 06:01:01G                                     | 0            | 140           | 16             | 0            | 0            | 0           | 95            | 251            |                                                      | C        | WD       |          |          |          | I        | I        | C                 |
| DQB1*06:01:06                                               | 06:01:06               | HLA05776  | 06:01:01G                                     | 0            | 1             | 0              | 0            | 0            | 0           | 1             | 2              |                                                      |          |          |          |          |          |          |          |                   |
| DQB1*06:01:10                                               | 06:01:10               | HLA09871  | 06:01:01G                                     | 0            | 0             | 2              | 0            | 0            | 0           | 1             | 3              |                                                      |          |          |          |          |          |          |          |                   |
| DQB1*06:103                                                 | 06:103                 | HLA09870  | 06:01:01G                                     | 0            | 0             | 1              | 2            | 0            | 0           | 2             | 5              |                                                      |          |          |          |          |          |          | WD       | WD                |
| DQB1*06:105                                                 | 06:105                 | HLA09873  | 06:01:01G                                     | 0            | 1             | 1              | 0            | 0            | 0           | 0             | 2              |                                                      |          |          |          |          |          |          |          |                   |
| DQB1*06:108                                                 | 06:108                 | HLA09929  | 06:01:01G                                     | 0            | 0             | 1              | 0            | 0            | 0           | 0             | 1              |                                                      |          |          |          |          |          |          |          |                   |
| DQB1*06:01:04                                               | 06:01:04               | HLA03307  |                                               | 0            | 2             | 1              | 0            | 0            | 0           | 0             | 3              |                                                      |          |          |          |          |          |          |          |                   |
| DQB1*06:01:08                                               | 06:01:08               | HLA09224  |                                               | 0            | 107           | 7              | 7            | 0            | 0           | 5             | 126            |                                                      | I        | WD       | WD       |          |          | WD       | WD       | I                 |
| DQB1*06:01:12                                               | 06:01:12               | HLA11125  |                                               | 0            | 1             | 1              | 0            | 0            | 0           | 0             | 2              |                                                      |          |          |          |          |          |          |          |                   |
| DQB1*06:01:14                                               | 06:01:14               | HLA12431  |                                               | 0            | 5             | 0              | 0            | 0            | 0           | 0             | 5              |                                                      | WD       |          |          |          |          |          | WD       | WD                |
| <b>DQB1*06:02 total</b>                                     | <b>06:02 total</b>     |           |                                               | <b>65894</b> | <b>34541</b>  | <b>1420381</b> | <b>19093</b> | <b>47738</b> | <b>5430</b> | <b>124187</b> | <b>1717264</b> | <b>C</b>                                             | <b>C</b> | <b>C</b> | <b>C</b> | <b>C</b> | <b>C</b> | <b>C</b> | <b>C</b> | <b>C</b>          |
| DQB1*06:02                                                  | 06:02                  |           |                                               | 575          | 187           | 22253          | 564          | 307          | 19          | 929           | 24834          | C                                                    | C        | C        | C        | C        | C        | C        | C        | C                 |
| DQB1*06:02P                                                 | 06:02P                 |           |                                               | 0            | 0             | 9              | 0            | 0            | 0           | 7             | 16             |                                                      |          | WD       |          |          |          | WD       | WD       | WD                |
| <b>DQB1*06:02:01G total</b>                                 | <b>06:02:01G total</b> |           |                                               | <b>65316</b> | <b>34294</b>  | <b>1397572</b> | <b>18471</b> | <b>47422</b> | <b>5408</b> | <b>123199</b> | <b>1691682</b> | <b>C</b>                                             | <b>C</b> | <b>C</b> | <b>C</b> | <b>C</b> | <b>C</b> | <b>C</b> | <b>C</b> | <b>C</b>          |

| Supplemental Table 15: HLA-DQB1 Allele Summary <sup>a</sup> |                |           | Allele Count by Population Group <sup>b</sup> |       |       |         |       |       |      |       |         | 3.0.0 CIWD Category by Population Group <sup>c</sup> |     |      |      |     |     |     |       |                   |    |
|-------------------------------------------------------------|----------------|-----------|-----------------------------------------------|-------|-------|---------|-------|-------|------|-------|---------|------------------------------------------------------|-----|------|------|-----|-----|-----|-------|-------------------|----|
| Allele                                                      | Genomic Typing | Allele ID | G group                                       | AFA   | API   | EURO    | MENA  | HIS   | NAM  | UNK   | Total   | AFA                                                  | API | EURO | MENA | HIS | NAM | UNK | Total | Highest Frequency |    |
| DQB1*06:02:01G                                              | 06:02:01G      |           | 06:02:01G                                     | 34391 | 21388 | 327237  | 6984  | 26772 | 3009 | 83845 | 503626  | C                                                    | C   | C    | C    | C   | C   | C   | C     | C                 | C  |
| DQB1*06:02:01                                               | 06:02:01       |           | 06:02:01G                                     | 30386 | 12729 | 1065569 | 11434 | 19968 | 2350 | 38724 | 1181160 | C                                                    | C   | C    | C    | C   | C   | C   | C     | C                 | C  |
| DQB1*06:02:01:01                                            | 06:02:01:01    | HLA00646  | 06:02:01G                                     | 515   | 168   | 4244    | 40    | 617   | 46   | 600   | 6230    | C                                                    | C   | C    | WD   | C   | C   | C   | C     | C                 | C  |
| DQB1*06:02:01:03                                            | 06:02:01:03    | HLA16150  | 06:02:01G                                     | 12    | 1     | 12      | 0     | 3     | 1    | 5     | 34      | WD                                                   |     | WD   |      |     |     | WD  | WD    | WD                | WD |
| DQB1*06:02:12                                               | 06:02:12       | HLA09932  | 06:02:01G                                     | 0     | 0     | 1       | 0     | 0     | 0    | 0     | 1       |                                                      |     |      |      |     |     |     |       |                   |    |
| DQB1*06:02:23                                               | 06:02:23       | HLA12703  | 06:02:01G                                     | 0     | 1     | 2       | 6     | 2     | 1    | 1     | 13      |                                                      |     |      | WD   |     |     |     | WD    | WD                | WD |
| DQB1*06:02:26                                               | 06:02:26       | HLA16155  | 06:02:01G                                     | 0     | 0     | 17      | 0     | 0     | 0    | 0     | 17      |                                                      |     | WD   |      |     |     |     | WD    | WD                | WD |
| DQB1*06:02:27                                               | 06:02:27       | HLA17201  | 06:02:01G                                     | 0     | 0     | 1       | 0     | 0     | 0    | 0     | 1       |                                                      |     |      |      |     |     |     |       |                   |    |
| DQB1*06:47                                                  | 06:47          | HLA07414  | 06:02:01G                                     | 0     | 0     | 9       | 0     | 0     | 0    | 1     | 10      |                                                      |     | WD   |      |     |     |     | WD    | WD                | WD |
| DQB1*06:84                                                  | 06:84          | HLA09472  | 06:02:01G                                     | 4     | 6     | 343     | 7     | 2     | 0    | 10    | 372     |                                                      | WD  | I    | WD   |     |     | WD  | I     | I                 | I  |
| DQB1*06:109                                                 | 06:109         | HLA09930  | 06:02:01G                                     | 1     | 0     | 7       | 0     | 7     | 0    | 0     | 15      |                                                      |     | WD   |      | I   |     |     | WD    | I                 | I  |
| DQB1*06:111                                                 | 06:111         | HLA10167  | 06:02:01G                                     | 1     | 1     | 20      | 0     | 0     | 0    | 0     | 22      |                                                      |     | WD   |      |     |     |     | WD    | WD                | WD |
| DQB1*06:116                                                 | 06:116         | HLA10246  | 06:02:01G                                     | 0     | 0     | 1       | 0     | 0     | 0    | 0     | 1       |                                                      |     |      |      |     |     |     |       |                   |    |
| DQB1*06:117                                                 | 06:117         | HLA10247  | 06:02:01G                                     | 0     | 0     | 63      | 0     | 0     | 0    | 1     | 64      |                                                      |     | WD   |      |     |     |     | WD    | WD                | WD |
| DQB1*06:127                                                 | 06:127         | HLA10506  | 06:02:01G                                     | 6     | 0     | 12      | 0     | 51    | 1    | 6     | 76      | WD                                                   |     | WD   |      | I   |     | WD  | WD    | I                 | I  |
| DQB1*06:188                                                 | 06:188         | HLA13932  | 06:02:01G                                     | 0     | 0     | 16      | 0     | 0     | 0    | 5     | 21      |                                                      |     | WD   |      |     |     | WD  | WD    | WD                | WD |
| DQB1*06:219                                                 | 06:219         | HLA16134  | 06:02:01G                                     | 0     | 0     | 6       | 0     | 0     | 0    | 1     | 7       |                                                      |     | WD   |      |     |     |     | WD    | WD                | WD |
| DQB1*06:224                                                 | 06:224         | HLA16165  | 06:02:01G                                     | 0     | 0     | 4       | 0     | 0     | 0    | 0     | 4       |                                                      |     |      |      |     |     |     |       |                   |    |
| DQB1*06:225                                                 | 06:225         | HLA16166  | 06:02:01G                                     | 0     | 0     | 1       | 0     | 0     | 0    | 0     | 1       |                                                      |     |      |      |     |     |     |       |                   |    |
| DQB1*06:226                                                 | 06:226         | HLA16183  | 06:02:01G                                     | 0     | 0     | 3       | 0     | 0     | 0    | 0     | 3       |                                                      |     |      |      |     |     |     |       |                   |    |
| DQB1*06:227                                                 | 06:227         | HLA16184  | 06:02:01G                                     | 0     | 0     | 1       | 0     | 0     | 0    | 0     | 1       |                                                      |     |      |      |     |     |     |       |                   |    |
| DQB1*06:237                                                 | 06:237         | HLA17291  | 06:02:01G                                     | 0     | 0     | 1       | 0     | 0     | 0    | 0     | 1       |                                                      |     |      |      |     |     |     |       |                   |    |
| DQB1*06:240                                                 | 06:240         | HLA17429  | 06:02:01G                                     | 0     | 0     | 2       | 0     | 0     | 0    | 0     | 2       |                                                      |     |      |      |     |     |     |       |                   |    |
| DQB1*06:02:02                                               | 06:02:02       | HLA03156  |                                               | 0     | 55    | 476     | 53    | 6     | 2    | 40    | 632     |                                                      | I   | I    | C    | WD  |     | I   | I     | I                 | C  |
| DQB1*06:02:03                                               | 06:02:03       | HLA09366  |                                               | 1     | 0     | 1       | 0     | 0     | 0    | 0     | 2       |                                                      |     |      |      |     |     |     |       |                   |    |
| DQB1*06:02:04                                               | 06:02:04       | HLA09370  |                                               | 1     | 0     | 11      | 0     | 0     | 0    | 0     | 12      |                                                      |     | WD   |      |     |     |     | WD    | WD                | WD |
| DQB1*06:02:05                                               | 06:02:05       | HLA09378  |                                               | 0     | 1     | 4       | 0     | 0     | 1    | 0     | 6       |                                                      |     |      |      |     |     |     | WD    | WD                | WD |
| DQB1*06:02:06                                               | 06:02:06       | HLA09381  |                                               | 0     | 0     | 8       | 0     | 0     | 0    | 1     | 9       |                                                      |     | WD   |      |     |     |     | WD    | WD                | WD |
| DQB1*06:02:07                                               | 06:02:07       | HLA09746  |                                               | 0     | 0     | 17      | 0     | 1     | 0    | 3     | 21      |                                                      |     | WD   |      |     |     |     | WD    | WD                | WD |
| DQB1*06:02:08                                               | 06:02:08       | HLA09749  |                                               | 0     | 0     | 0       | 5     | 0     | 0    | 0     | 5       |                                                      |     |      | WD   |     |     |     | WD    | WD                | WD |
| DQB1*06:02:09                                               | 06:02:09       | HLA09750  |                                               | 1     | 0     | 1       | 0     | 1     | 0    | 1     | 4       |                                                      |     |      |      |     |     |     |       |                   |    |

| Supplemental Table 15: HLA-DQB1 Allele Summary <sup>a</sup> |                        |           | Allele Count by Population Group <sup>b</sup> |             |              |               |              |              |             |              |                | 3.0.0 CIWD Category by Population Group <sup>c</sup> |          |          |          |          |          |          |          |                   |
|-------------------------------------------------------------|------------------------|-----------|-----------------------------------------------|-------------|--------------|---------------|--------------|--------------|-------------|--------------|----------------|------------------------------------------------------|----------|----------|----------|----------|----------|----------|----------|-------------------|
| Allele                                                      | Genomic Typing         | Allele ID | G group                                       | AFA         | API          | EURO          | MENA         | HIS          | NAM         | UNK          | Total          | AFA                                                  | API      | EURO     | MENA     | HIS      | NAM      | UNK      | Total    | Highest Frequency |
| DQB1*06:02:11                                               | 06:02:11               | HLA09925  |                                               | 0           | 2            | 0             | 0            | 0            | 0           | 0            | 2              |                                                      |          |          |          |          |          |          |          |                   |
| DQB1*06:02:14                                               | 06:02:14               | HLA10299  |                                               | 0           | 0            | 5             | 0            | 0            | 0           | 5            | 10             |                                                      |          | WD       |          |          |          | WD       | WD       | WD                |
| DQB1*06:02:15                                               | 06:02:15               | HLA10659  |                                               | 0           | 1            | 5             | 0            | 0            | 0           | 0            | 6              |                                                      |          | WD       |          |          |          |          | WD       | WD                |
| DQB1*06:02:16                                               | 06:02:16               | HLA11154  |                                               | 0           | 1            | 9             | 0            | 1            | 0           | 2            | 13             |                                                      |          | WD       |          |          |          |          | WD       | WD                |
| DQB1*06:02:17                                               | 06:02:17               | HLA11366  |                                               | 0           | 0            | 6             | 0            | 0            | 0           | 0            | 6              |                                                      |          | WD       |          |          |          |          | WD       | WD                |
| DQB1*06:02:20                                               | 06:02:20               | HLA11893  |                                               | 0           | 0            | 2             | 0            | 0            | 0           | 0            | 2              |                                                      |          |          |          |          |          |          |          |                   |
| DQB1*06:02:24                                               | 06:02:24               | HLA13149  |                                               | 0           | 0            | 1             | 0            | 0            | 0           | 0            | 1              |                                                      |          |          |          |          |          |          |          |                   |
| DQB1*06:02:25                                               | 06:02:25               | HLA13923  |                                               | 0           | 0            | 1             | 0            | 0            | 0           | 0            | 1              |                                                      |          |          |          |          |          |          |          |                   |
| <b>DQB1*06:03 total</b>                                     | <b>06:03 total</b>     |           |                                               | <b>9807</b> | <b>70202</b> | <b>820986</b> | <b>23070</b> | <b>30079</b> | <b>3033</b> | <b>71102</b> | <b>1028279</b> | <b>C</b>                                             | <b>C</b> | <b>C</b> | <b>C</b> | <b>C</b> | <b>C</b> | <b>C</b> | <b>C</b> | <b>C</b>          |
| DQB1*06:03                                                  | 06:03                  |           |                                               | 12          | 71           | 11410         | 644          | 23           | 2           | 288          | 12450          | WD                                                   | I        | C        | C        | I        |          | C        | C        | C                 |
| DQB1*06:03P                                                 | 06:03P                 |           |                                               | 0           | 0            | 10            | 0            | 0            | 0           | 1            | 11             |                                                      |          | WD       |          |          |          |          | WD       | WD                |
| <b>DQB1*06:03:01G total</b>                                 | <b>06:03:01G total</b> |           |                                               | <b>9794</b> | <b>70124</b> | <b>808947</b> | <b>22419</b> | <b>30044</b> | <b>3031</b> | <b>70795</b> | <b>1015154</b> | <b>C</b>                                             | <b>C</b> | <b>C</b> | <b>C</b> | <b>C</b> | <b>C</b> | <b>C</b> | <b>C</b> | <b>C</b>          |
| DQB1*06:03:01G                                              | 06:03:01G              |           | 06:03:01G                                     | 5453        | 52611        | 232934        | 9279         | 17999        | 1881        | 55543        | 375700         | C                                                    | C        | C        | C        | C        | C        | C        | C        | C                 |
| DQB1*06:03:01                                               | 06:03:01               |           | 06:03:01G                                     | 4331        | 17127        | 575575        | 13100        | 12040        | 1149        | 15222        | 638544         | C                                                    | C        | C        | C        | C        | C        | C        | C        | C                 |
| DQB1*06:03:01:01                                            | 06:03:01:01            | HLA00647  | 06:03:01G                                     | 0           | 0            | 0             | 0            | 0            | 0           | 1            | 1              |                                                      |          |          |          |          |          |          |          |                   |
| DQB1*06:03:21                                               | 06:03:21               | HLA13922  | 06:03:01G                                     | 0           | 0            | 3             | 16           | 0            | 0           | 0            | 19             |                                                      |          |          | WD       |          |          |          | WD       | WD                |
| DQB1*06:03:22                                               | 06:03:22               | HLA14471  | 06:03:01G                                     | 0           | 0            | 3             | 0            | 0            | 0           | 0            | 3              |                                                      |          |          |          |          |          |          |          |                   |
| DQB1*06:03:23                                               | 06:03:23               | HLA16126  | 06:03:01G                                     | 0           | 0            | 18            | 0            | 0            | 0           | 0            | 18             |                                                      |          | WD       |          |          |          |          | WD       | WD                |
| DQB1*06:03:24                                               | 06:03:24               | HLA16135  | 06:03:01G                                     | 0           | 0            | 1             | 0            | 0            | 0           | 0            | 1              |                                                      |          |          |          |          |          |          |          |                   |
| DQB1*06:41                                                  | 06:41                  | HLA06179  | 06:03:01G                                     | 9           | 154          | 198           | 16           | 3            | 1           | 16           | 397            | WD                                                   | C        | I        | WD       |          |          | I        | I        | C                 |
| DQB1*06:44                                                  | 06:44                  | HLA06518  | 06:03:01G                                     | 0           | 4            | 170           | 0            | 1            | 0           | 2            | 177            |                                                      |          | I        |          |          |          |          | I        | I                 |
| DQB1*06:110                                                 | 06:110                 | HLA10113  | 06:03:01G                                     | 1           | 228          | 9             | 1            | 0            | 0           | 9            | 248            |                                                      | C        | WD       |          |          |          | WD       | I        | C                 |
| DQB1*06:185                                                 | 06:185                 | HLA13916  | 06:03:01G                                     | 0           | 0            | 10            | 0            | 0            | 0           | 1            | 11             |                                                      |          | WD       |          |          |          |          | WD       | WD                |
| DQB1*06:187                                                 | 06:187                 | HLA13927  | 06:03:01G                                     | 0           | 0            | 20            | 7            | 1            | 0           | 1            | 29             |                                                      |          | WD       | WD       |          |          |          | WD       | WD                |
| DQB1*06:223                                                 | 06:223                 | HLA16164  | 06:03:01G                                     | 0           | 0            | 6             | 0            | 0            | 0           | 0            | 6              |                                                      |          | WD       |          |          |          |          | WD       | WD                |
| DQB1*06:03:02                                               | 06:03:02               | HLA02638  |                                               | 0           | 0            | 548           | 0            | 6            | 0           | 15           | 569            |                                                      |          | I        |          | WD       |          | I        | I        | I                 |
| DQB1*06:03:04                                               | 06:03:04               | HLA09269  |                                               | 1           | 3            | 11            | 1            | 0            | 0           | 0            | 16             |                                                      |          | WD       |          |          |          |          | WD       | WD                |
| DQB1*06:03:05                                               | 06:03:05               | HLA09272  |                                               | 0           | 0            | 0             | 0            | 6            | 0           | 1            | 7              |                                                      |          |          |          | WD       |          |          | WD       | WD                |
| DQB1*06:03:06                                               | 06:03:06               | HLA09274  |                                               | 0           | 0            | 3             | 0            | 0            | 0           | 0            | 3              |                                                      |          |          |          |          |          |          |          |                   |
| DQB1*06:03:07                                               | 06:03:07               | HLA09278  |                                               | 0           | 2            | 16            | 2            | 0            | 0           | 2            | 22             |                                                      |          | WD       |          |          |          |          | WD       | WD                |
| DQB1*06:03:08                                               | 06:03:08               | HLA09736  |                                               | 0           | 0            | 1             | 0            | 0            | 0           | 0            | 1              |                                                      |          |          |          |          |          |          |          |                   |

| Supplemental Table 15: HLA-DQB1 Allele Summary <sup>a</sup> |                        |           | Allele Count by Population Group <sup>b</sup> |             |              |               |              |              |             |              |               | 3.0.0 CIWD Category by Population Group <sup>c</sup> |           |           |           |           |          |          |           |                   |
|-------------------------------------------------------------|------------------------|-----------|-----------------------------------------------|-------------|--------------|---------------|--------------|--------------|-------------|--------------|---------------|------------------------------------------------------|-----------|-----------|-----------|-----------|----------|----------|-----------|-------------------|
| Allele                                                      | Genomic Typing         | Allele ID | G group                                       | AFA         | API          | EURO          | MENA         | HIS          | NAM         | UNK          | Total         | AFA                                                  | API       | EURO      | MENA      | HIS       | NAM      | UNK      | Total     | Highest Frequency |
| DQB1*06:03:09                                               | 06:03:09               | HLA09738  |                                               | 0           | 0            | 17            | 0            | 0            | 0           | 0            | 17            |                                                      |           | WD        |           |           |          |          | WD        | WD                |
| DQB1*06:03:11                                               | 06:03:11               | HLA10545  |                                               | 0           | 0            | 5             | 1            | 0            | 0           | 0            | 6             |                                                      |           | WD        |           |           |          |          | WD        | WD                |
| DQB1*06:03:12                                               | 06:03:12               | HLA11136  |                                               | 0           | 0            | 4             | 0            | 0            | 0           | 0            | 4             |                                                      |           |           |           |           |          |          |           |                   |
| DQB1*06:03:13                                               | 06:03:13               | HLA11137  |                                               | 0           | 0            | 5             | 0            | 0            | 0           | 0            | 5             |                                                      |           | WD        |           |           |          |          | WD        | WD                |
| DQB1*06:03:14                                               | 06:03:14               | HLA11138  |                                               | 0           | 0            | 1             | 0            | 0            | 0           | 0            | 1             |                                                      |           |           |           |           |          |          |           |                   |
| DQB1*06:03:15                                               | 06:03:15               | HLA11355  |                                               | 0           | 0            | 5             | 3            | 0            | 0           | 0            | 8             |                                                      |           | WD        |           |           |          |          | WD        | WD                |
| DQB1*06:03:18                                               | 06:03:18               | HLA12799  |                                               | 0           | 1            | 1             | 0            | 0            | 0           | 0            | 2             |                                                      |           |           |           |           |          |          |           |                   |
| DQB1*06:03:19                                               | 06:03:19               | HLA13132  |                                               | 0           | 1            | 0             | 0            | 0            | 0           | 0            | 1             |                                                      |           |           |           |           |          |          |           |                   |
| DQB1*06:03:26                                               | 06:03:26               | HLA16188  |                                               | 0           | 0            | 2             | 0            | 0            | 0           | 0            | 2             |                                                      |           |           |           |           |          |          |           |                   |
| <b>DQB1*06:04 total</b>                                     | <b>06:04 total</b>     |           |                                               | <b>8255</b> | <b>17616</b> | <b>367336</b> | <b>13049</b> | <b>16447</b> | <b>1679</b> | <b>40890</b> | <b>465272</b> | <b>C</b>                                             | <b>C</b>  | <b>C</b>  | <b>C</b>  | <b>C</b>  | <b>C</b> | <b>C</b> | <b>C</b>  | <b>C</b>          |
| DQB1*06:04                                                  | 06:04                  |           |                                               | 104         | 222          | 16870         | 442          | 63           | 6           | 281          | 17988         | C                                                    | C         | C         | C         | I         | WD       | C        | C         | C                 |
| DQB1*06:04P                                                 | 06:04P                 |           |                                               | 0           | 0            | 4             | 0            | 0            | 0           | 3            | 7             |                                                      |           |           |           |           |          |          | WD        | WD                |
| <b>DQB1*06:04:01G total</b>                                 | <b>06:04:01G total</b> |           |                                               | <b>8151</b> | <b>17393</b> | <b>350216</b> | <b>12605</b> | <b>16383</b> | <b>1673</b> | <b>40595</b> | <b>447016</b> | <b>C</b>                                             | <b>C</b>  | <b>C</b>  | <b>C</b>  | <b>C</b>  | <b>C</b> | <b>C</b> | <b>C</b>  | <b>C</b>          |
| DQB1*06:04:01G                                              | 06:04:01G              |           | 06:04:01G                                     | 5009        | 13202        | 152811        | 6452         | 10152        | 1069        | 33335        | 222030        | C                                                    | C         | C         | C         | C         | C        | C        | C         | C                 |
| DQB1*06:04:01                                               | 06:04:01               | HLA00648  | 06:04:01G                                     | 3118        | 4186         | 196007        | 6141         | 6220         | 604         | 7245         | 223521        | C                                                    | C         | C         | C         | C         | C        | C        | C         | C                 |
| DQB1*06:34                                                  | 06:34                  | HLA03114  | 06:04:01G                                     | 0           | 0            | 23            | 0            | 0            | 0           | 0            | 23            |                                                      |           | WD        |           |           |          |          | WD        | WD                |
| DQB1*06:36                                                  | 06:36                  | HLA03979  | 06:04:01G                                     | 0           | 1            | 114           | 2            | 0            | 0           | 2            | 119           |                                                      |           | WD        |           |           |          |          | WD        | WD                |
| DQB1*06:38                                                  | 06:38                  | HLA04357  | 06:04:01G                                     | 0           | 0            | 8             | 0            | 0            | 0           | 0            | 8             |                                                      |           | WD        |           |           |          |          | WD        | WD                |
| DQB1*06:39                                                  | 06:39                  | HLA04358  | 06:04:01G                                     | 24          | 4            | 1241          | 9            | 6            | 0           | 13           | 1297          | WD                                                   |           | C         | WD        | WD        |          | I        | I         | C                 |
| DQB1*06:52                                                  | 06:52                  | HLA08082  | 06:04:01G                                     | 0           | 0            | 7             | 0            | 5            | 0           | 0            | 12            |                                                      |           | WD        |           | WD        |          |          | WD        | WD                |
| DQB1*06:217                                                 | 06:217                 | HLA16016  | 06:04:01G                                     | 0           | 0            | 5             | 1            | 0            | 0           | 0            | 6             |                                                      |           | WD        |           |           |          |          | WD        | WD                |
| DQB1*06:04:02                                               | 06:04:02               | HLA01005  |                                               | 0           | 1            | 117           | 2            | 1            | 0           | 9            | 130           |                                                      |           | WD        |           |           |          | WD       | WD        | WD                |
| DQB1*06:04:03                                               | 06:04:03               | HLA02602  |                                               | 0           | 0            | 86            | 0            | 0            | 0           | 0            | 86            |                                                      |           | WD        |           |           |          |          | WD        | WD                |
| DQB1*06:04:05                                               | 06:04:05               | HLA09244  |                                               | 0           | 0            | 1             | 0            | 0            | 0           | 0            | 1             |                                                      |           |           |           |           |          |          |           |                   |
| DQB1*06:04:06                                               | 06:04:06               | HLA09270  |                                               | 0           | 0            | 37            | 0            | 0            | 0           | 2            | 39            |                                                      |           | WD        |           |           |          |          | WD        | WD                |
| DQB1*06:04:08                                               | 06:04:08               | HLA09936  |                                               | 0           | 0            | 1             | 0            | 0            | 0           | 0            | 1             |                                                      |           |           |           |           |          |          |           |                   |
| DQB1*06:04:09                                               | 06:04:09               | HLA11589  |                                               | 0           | 0            | 4             | 0            | 0            | 0           | 0            | 4             |                                                      |           |           |           |           |          |          |           |                   |
| <b>DQB1*06:05 total</b>                                     | <b>06:05 total</b>     |           |                                               | <b>0</b>    | <b>0</b>     | <b>11</b>     | <b>0</b>     | <b>1</b>     | <b>0</b>    | <b>1</b>     | <b>13</b>     |                                                      |           | <b>WD</b> |           |           |          |          | <b>WD</b> | <b>WD</b>         |
| DQB1*06:05                                                  | 06:05                  |           |                                               | 0           | 0            | 11            | 0            | 1            | 0           | 0            | 12            |                                                      |           | WD        |           |           |          |          | WD        | WD                |
| DQB1*06:05:01                                               | 06:05:01               | HLA00649  |                                               | 0           | 0            | 0             | 0            | 0            | 0           | 1            | 1             |                                                      |           |           |           |           |          |          |           |                   |
| <b>DQB1*06:07 total</b>                                     | <b>06:07 total</b>     |           |                                               | <b>1</b>    | <b>6</b>     | <b>506</b>    | <b>7</b>     | <b>6</b>     | <b>0</b>    | <b>29</b>    | <b>555</b>    |                                                      | <b>WD</b> | <b>I</b>  | <b>WD</b> | <b>WD</b> |          | <b>I</b> | <b>I</b>  | <b>I</b>          |

| Supplemental Table 15: HLA-DQB1 Allele Summary <sup>a</sup> |                        |           | Allele Count by Population Group <sup>b</sup> |              |              |              |             |             |            |              |               | 3.0.0 CIWD Category by Population Group <sup>c</sup> |           |           |           |          |          |           |          |                   |
|-------------------------------------------------------------|------------------------|-----------|-----------------------------------------------|--------------|--------------|--------------|-------------|-------------|------------|--------------|---------------|------------------------------------------------------|-----------|-----------|-----------|----------|----------|-----------|----------|-------------------|
| Allele                                                      | Genomic Typing         | Allele ID | G group                                       | AFA          | API          | EURO         | MENA        | HIS         | NAM        | UNK          | Total         | AFA                                                  | API       | EURO      | MENA      | HIS      | NAM      | UNK       | Total    | Highest Frequency |
| DQB1*06:07                                                  | 06:07                  |           |                                               | 0            | 0            | 36           | 0           | 1           | 0          | 2            | 39            |                                                      |           | WD        |           |          |          |           | WD       | WD                |
| DQB1*06:07:01                                               | 06:07:01               | HLA00652  |                                               | 1            | 2            | 378          | 5           | 4           | 0          | 24           | 414           |                                                      |           | I         | WD        |          |          | I         | I        | I                 |
| DQB1*06:07:02                                               | 06:07:02               | HLA05768  |                                               | 0            | 4            | 92           | 2           | 1           | 0          | 3            | 102           |                                                      |           | WD        |           |          |          |           | WD       | WD                |
| <b>DQB1*06:08 total</b>                                     | <b>06:08 total</b>     |           |                                               | <b>1340</b>  | <b>6</b>     | <b>69</b>    | <b>33</b>   | <b>84</b>   | <b>20</b>  | <b>267</b>   | <b>1819</b>   | <b>C</b>                                             | <b>WD</b> | <b>WD</b> | <b>WD</b> | <b>C</b> | <b>C</b> | <b>C</b>  | <b>C</b> | <b>C</b>          |
| DQB1*06:08                                                  | 06:08                  |           |                                               | 100          | 1            | 4            | 2           | 12          | 2          | 22           | 143           | C                                                    |           |           |           | I        |          | I         | WD       | C                 |
| DQB1*06:08:01                                               | 06:08:01               | HLA00653  |                                               | 1240         | 4            | 39           | 31          | 72          | 18         | 245          | 1649          | C                                                    |           | WD        | WD        | C        | C        | C         | C        | C                 |
| DQB1*06:08:02                                               | 06:08:02               | HLA02609  |                                               | 0            | 1            | 26           | 0           | 0           | 0          | 0            | 27            |                                                      |           | WD        |           |          |          |           | WD       | WD                |
| <b>DQB1*06:09 total</b>                                     | <b>06:09 total</b>     |           |                                               | <b>13515</b> | <b>25154</b> | <b>73514</b> | <b>3654</b> | <b>6225</b> | <b>704</b> | <b>14022</b> | <b>136788</b> | <b>C</b>                                             | <b>C</b>  | <b>C</b>  | <b>C</b>  | <b>C</b> | <b>C</b> | <b>C</b>  | <b>C</b> | <b>C</b>          |
| DQB1*06:09                                                  | 06:09                  |           |                                               | 2700         | 2699         | 12348        | 438         | 999         | 155        | 1763         | 21102         | C                                                    | C         | C         | C         | C        | C        | C         | C        | C                 |
| DQB1*06:09P                                                 | 06:09P                 |           |                                               | 0            | 0            | 1            | 0           | 0           | 0          | 0            | 1             |                                                      |           |           |           |          |          |           |          |                   |
| <b>DQB1*06:09:01G total</b>                                 | <b>06:09:01G total</b> |           |                                               | <b>10813</b> | <b>22455</b> | <b>61130</b> | <b>3214</b> | <b>5220</b> | <b>549</b> | <b>12244</b> | <b>115625</b> | <b>C</b>                                             | <b>C</b>  | <b>C</b>  | <b>C</b>  | <b>C</b> | <b>C</b> | <b>C</b>  | <b>C</b> | <b>C</b>          |
| DQB1*06:09:01G                                              | 06:09:01G              |           | 06:09:01G                                     | 5863         | 17356        | 23227        | 2118        | 2836        | 319        | 8817         | 60536         | C                                                    | C         | C         | C         | C        | C        | C         | C        | C                 |
| DQB1*06:09:01                                               | 06:09:01               |           | 06:09:01G                                     | 4794         | 5033         | 37499        | 1087        | 2292        | 225        | 3353         | 54283         | C                                                    | C         | C         | C         | C        | C        | C         | C        | C                 |
| DQB1*06:09:01:01                                            | 06:09:01:01            | HLA00654  | 06:09:01G                                     | 124          | 65           | 326          | 7           | 75          | 5          | 64           | 666           | C                                                    | I         | I         | WD        | C        | WD       | I         | I        | C                 |
| DQB1*06:09:01:02                                            | 06:09:01:02            | HLA16360  | 06:09:01G                                     | 5            | 0            | 19           | 0           | 12          | 0          | 2            | 38            | WD                                                   |           | WD        |           | I        |          |           | WD       | I                 |
| DQB1*06:88                                                  | 06:88                  | HLA09651  | 06:09:01G                                     | 27           | 1            | 59           | 2           | 5           | 0          | 8            | 102           | WD                                                   |           | WD        |           | WD       |          | WD        | WD       | WD                |
| DQB1*06:09:02                                               | 06:09:02               | HLA09275  |                                               | 2            | 0            | 27           | 0           | 0           | 0          | 6            | 35            |                                                      |           | WD        |           |          |          | WD        | WD       | WD                |
| DQB1*06:09:03                                               | 06:09:03               | HLA09277  |                                               | 0            | 0            | 2            | 0           | 5           | 0          | 6            | 13            |                                                      |           |           |           | WD       |          | WD        | WD       | WD                |
| DQB1*06:09:04                                               | 06:09:04               | HLA09937  |                                               | 0            | 0            | 3            | 0           | 0           | 0          | 1            | 4             |                                                      |           |           |           |          |          |           |          |                   |
| DQB1*06:09:05                                               | 06:09:05               | HLA11140  |                                               | 0            | 0            | 3            | 2           | 0           | 0          | 0            | 5             |                                                      |           |           |           |          |          |           | WD       | WD                |
| DQB1*06:09:06                                               | 06:09:06               | HLA11677  |                                               | 0            | 0            | 0            | 0           | 1           | 0          | 1            | 2             |                                                      |           |           |           |          |          |           |          |                   |
| DQB1*06:09:07                                               | 06:09:07               | HLA17170  |                                               | 0            | 0            | 0            | 0           | 0           | 0          | 1            | 1             |                                                      |           |           |           |          |          |           |          |                   |
| DQB1*06:10                                                  | 06:10                  | HLA00655  |                                               | 0            | 459          | 6            | 0           | 2           | 0          | 35           | 502           |                                                      | C         | WD        |           |          |          | I         | I        | C                 |
| <b>DQB1*06:11 total</b>                                     | <b>06:11 total</b>     |           |                                               | <b>392</b>   | <b>38</b>    | <b>363</b>   | <b>17</b>   | <b>70</b>   | <b>10</b>  | <b>117</b>   | <b>1007</b>   | <b>C</b>                                             | <b>I</b>  | <b>I</b>  | <b>WD</b> | <b>C</b> | <b>C</b> | <b>I</b>  | <b>I</b> | <b>C</b>          |
| DQB1*06:11                                                  | 06:11                  |           |                                               | 31           | 1            | 28           | 0           | 17          | 0          | 6            | 83            | WD                                                   |           | WD        |           | I        |          | WD        | WD       | I                 |
| DQB1*06:11:01                                               | 06:11:01               | HLA00656  |                                               | 360          | 35           | 256          | 17          | 52          | 10         | 103          | 833           | C                                                    | I         | I         | WD        | I        | C        | I         | I        | C                 |
| DQB1*06:11:02                                               | 06:11:02               | HLA00657  |                                               | 0            | 2            | 79           | 0           | 1           | 0          | 8            | 90            |                                                      |           | WD        |           |          |          | WD        | WD       | WD                |
| DQB1*06:11:03                                               | 06:11:03               | HLA11508  |                                               | 1            | 0            | 0            | 0           | 0           | 0          | 0            | 1             |                                                      |           |           |           |          |          |           |          |                   |
| DQB1*06:12                                                  | 06:12                  | HLA00658  |                                               | 1            | 5            | 7            | 0           | 2           | 0          | 0            | 15            |                                                      | WD        | WD        |           |          |          |           | WD       | WD                |
| <b>DQB1*06:13 total</b>                                     | <b>06:13 total</b>     |           |                                               | <b>5</b>     | <b>1</b>     | <b>277</b>   | <b>2</b>    | <b>1</b>    | <b>0</b>   | <b>8</b>     | <b>294</b>    | <b>WD</b>                                            |           | <b>I</b>  |           |          |          | <b>WD</b> | <b>I</b> | <b>I</b>          |
| DQB1*06:13                                                  | 06:13                  |           |                                               | 2            | 0            | 50           | 0           | 0           | 0          | 2            | 54            |                                                      |           | WD        |           |          |          |           | WD       | WD                |

| Supplemental Table 15: HLA-DQB1 Allele Summary <sup>a</sup> |                    |           | Allele Count by Population Group <sup>b</sup> |           |          |            |           |           |          |            |            | 3.0.0 CIWD Category by Population Group <sup>c</sup> |           |           |           |          |     |           |           |                   |
|-------------------------------------------------------------|--------------------|-----------|-----------------------------------------------|-----------|----------|------------|-----------|-----------|----------|------------|------------|------------------------------------------------------|-----------|-----------|-----------|----------|-----|-----------|-----------|-------------------|
| Allele                                                      | Genomic Typing     | Allele ID | G group                                       | AFA       | API      | EURO       | MENA      | HIS       | NAM      | UNK        | Total      | AFA                                                  | API       | EURO      | MENA      | HIS      | NAM | UNK       | Total     | Highest Frequency |
| DQB1*06:13:01                                               | 06:13:01           | HLA00659  |                                               | 2         | 1        | 225        | 2         | 1         | 0        | 6          | 237        |                                                      |           | I         |           |          |     | WD        | I         | I                 |
| DQB1*06:13:02                                               | 06:13:02           | HLA09377  |                                               | 1         | 0        | 2          | 0         | 0         | 0        | 0          | 3          |                                                      |           |           |           |          |     |           |           |                   |
| <b>DQB1*06:14 total</b>                                     | <b>06:14 total</b> |           |                                               | <b>9</b>  | <b>5</b> | <b>521</b> | <b>14</b> | <b>11</b> | <b>2</b> | <b>110</b> | <b>672</b> | <b>WD</b>                                            | <b>WD</b> | <b>I</b>  | <b>WD</b> | <b>I</b> |     | <b>I</b>  | <b>I</b>  | <b>I</b>          |
| DQB1*06:14                                                  | 06:14              |           |                                               | 1         | 0        | 40         | 0         | 2         | 1        | 1          | 45         |                                                      |           | WD        |           |          |     |           | WD        | WD                |
| DQB1*06:14:01                                               | 06:14:01           | HLA00660  |                                               | 7         | 4        | 336        | 3         | 4         | 1        | 71         | 426        | WD                                                   |           | I         |           |          |     | I         | I         | I                 |
| DQB1*06:14:02                                               | 06:14:02           | HLA03431  |                                               | 1         | 1        | 145        | 11        | 5         | 0        | 38         | 201        |                                                      |           | I         | WD        | WD       |     | I         | I         | I                 |
| <b>DQB1*06:15 total</b>                                     | <b>06:15 total</b> |           |                                               | <b>0</b>  | <b>2</b> | <b>97</b>  | <b>0</b>  | <b>0</b>  | <b>0</b> | <b>1</b>   | <b>100</b> |                                                      |           | <b>WD</b> |           |          |     |           | <b>WD</b> | <b>WD</b>         |
| DQB1*06:15                                                  | 06:15              |           |                                               | 0         | 1        | 13         | 0         | 0         | 0        | 0          | 14         |                                                      |           | WD        |           |          |     |           | WD        | WD                |
| DQB1*06:15:01                                               | 06:15:01           | HLA00661  |                                               | 0         | 1        | 24         | 0         | 0         | 0        | 1          | 26         |                                                      |           | WD        |           |          |     |           | WD        | WD                |
| DQB1*06:15:02                                               | 06:15:02           | HLA09368  |                                               | 0         | 0        | 60         | 0         | 0         | 0        | 0          | 60         |                                                      |           | WD        |           |          |     |           | WD        | WD                |
| DQB1*06:16                                                  | 06:16              | HLA01006  |                                               | 8         | 0        | 442        | 0         | 11        | 1        | 51         | 513        | WD                                                   |           | I         |           | I        |     | I         | I         | I                 |
| DQB1*06:17                                                  | 06:17              | HLA01175  |                                               | 0         | 0        | 4          | 0         | 0         | 0        | 0          | 4          |                                                      |           |           |           |          |     |           |           |                   |
| <b>DQB1*06:18 total</b>                                     | <b>06:18 total</b> |           |                                               | <b>7</b>  | <b>2</b> | <b>10</b>  | <b>2</b>  | <b>0</b>  | <b>0</b> | <b>4</b>   | <b>25</b>  | <b>WD</b>                                            |           | <b>WD</b> |           |          |     |           | <b>WD</b> | <b>WD</b>         |
| DQB1*06:18                                                  | 06:18              |           |                                               | 1         | 1        | 1          | 2         | 0         | 0        | 1          | 6          |                                                      |           |           |           |          |     |           | WD        | WD                |
| DQB1*06:18:01                                               | 06:18:01           | HLA01446  |                                               | 6         | 1        | 9          | 0         | 0         | 0        | 3          | 19         | WD                                                   |           | WD        |           |          |     |           | WD        | WD                |
| <b>DQB1*06:19 total</b>                                     | <b>06:19 total</b> |           |                                               | <b>0</b>  | <b>1</b> | <b>2</b>   | <b>0</b>  | <b>0</b>  | <b>0</b> | <b>1</b>   | <b>4</b>   |                                                      |           |           |           |          |     |           |           |                   |
| DQB1*06:19                                                  | 06:19              |           |                                               | 0         | 0        | 2          | 0         | 0         | 0        | 0          | 2          |                                                      |           |           |           |          |     |           |           |                   |
| DQB1*06:19:01                                               | 06:19:01           | HLA01460  |                                               | 0         | 1        | 0          | 0         | 0         | 0        | 1          | 2          |                                                      |           |           |           |          |     |           |           |                   |
| DQB1*06:20                                                  | 06:20              | HLA01612  |                                               | 7         | 0        | 51         | 0         | 0         | 0        | 3          | 61         | WD                                                   |           | WD        |           |          |     |           | WD        | WD                |
| DQB1*06:21                                                  | 06:21              | HLA01776  |                                               | 1         | 2        | 154        | 1         | 1         | 0        | 2          | 161        |                                                      |           | I         |           |          |     |           | I         | I                 |
| <b>DQB1*06:22 total</b>                                     | <b>06:22 total</b> |           |                                               | <b>11</b> | <b>2</b> | <b>11</b>  | <b>2</b>  | <b>1</b>  | <b>0</b> | <b>7</b>   | <b>34</b>  | <b>WD</b>                                            |           | <b>WD</b> |           |          |     | <b>WD</b> | <b>WD</b> | <b>WD</b>         |
| DQB1*06:22                                                  | 06:22              |           |                                               | 4         | 0        | 4          | 0         | 0         | 0        | 0          | 8          |                                                      |           |           |           |          |     |           | WD        | WD                |
| DQB1*06:22:01                                               | 06:22:01           | HLA01967  |                                               | 4         | 0        | 2          | 1         | 1         | 0        | 2          | 10         |                                                      |           |           |           |          |     |           | WD        | WD                |
| DQB1*06:22:02                                               | 06:22:02           | HLA09476  |                                               | 3         | 1        | 1          | 0         | 0         | 0        | 4          | 9          |                                                      |           |           |           |          |     |           | WD        | WD                |
| DQB1*06:22:03                                               | 06:22:03           | HLA11600  |                                               | 0         | 1        | 4          | 1         | 0         | 0        | 1          | 7          |                                                      |           |           |           |          |     |           | WD        | WD                |
| DQB1*06:23                                                  | 06:23              | HLA02005  |                                               | 0         | 0        | 34         | 0         | 1         | 0        | 0          | 35         |                                                      |           | WD        |           |          |     |           | WD        | WD                |
| DQB1*06:24                                                  | 06:24              | HLA02182  |                                               | 0         | 0        | 2          | 0         | 0         | 0        | 0          | 2          |                                                      |           |           |           |          |     |           |           |                   |
| DQB1*06:25                                                  | 06:25              | HLA02195  |                                               | 0         | 0        | 2          | 1         | 0         | 0        | 0          | 3          |                                                      |           |           |           |          |     |           |           |                   |
| DQB1*06:26N                                                 | 06:26N             | HLA02221  |                                               | 5         | 1        | 52         | 0         | 1         | 0        | 15         | 74         | WD                                                   |           | WD        |           |          |     | I         | WD        | I                 |
| <b>DQB1*06:27 total</b>                                     | <b>06:27 total</b> |           |                                               | <b>1</b>  | <b>1</b> | <b>59</b>  | <b>0</b>  | <b>1</b>  | <b>0</b> | <b>5</b>   | <b>67</b>  |                                                      |           | <b>WD</b> |           |          |     | <b>WD</b> | <b>WD</b> | <b>WD</b>         |
| DQB1*06:27                                                  | 06:27              |           |                                               | 1         | 0        | 21         | 0         | 1         | 0        | 0          | 23         |                                                      |           | WD        |           |          |     |           | WD        | WD                |



| Supplemental Table 15: HLA-DQB1 Allele Summary <sup>a</sup> |                    |           | Allele Count by Population Group <sup>b</sup> |          |          |           |          |          |          |          |           | 3.0.0 CIWD Category by Population Group <sup>c</sup> |           |           |      |     |     |     |           |                   |
|-------------------------------------------------------------|--------------------|-----------|-----------------------------------------------|----------|----------|-----------|----------|----------|----------|----------|-----------|------------------------------------------------------|-----------|-----------|------|-----|-----|-----|-----------|-------------------|
| Allele                                                      | Genomic Typing     | Allele ID | G group                                       | AFA      | API      | EURO      | MENA     | HIS      | NAM      | UNK      | Total     | AFA                                                  | API       | EURO      | MENA | HIS | NAM | UNK | Total     | Highest Frequency |
| DQB1*06:27:01                                               | 06:27:01           | HLA02291  |                                               | 0        | 0        | 37        | 0        | 0        | 0        | 5        | 42        |                                                      |           | WD        |      |     |     | WD  | WD        | WD                |
| DQB1*06:27:02                                               | 06:27:02           | HLA10281  |                                               | 0        | 1        | 1         | 0        | 0        | 0        | 0        | 2         |                                                      |           |           |      |     |     |     |           |                   |
| DQB1*06:28                                                  | 06:28              | HLA02453  |                                               | 0        | 0        | 67        | 0        | 0        | 0        | 2        | 69        |                                                      |           | WD        |      |     |     |     | WD        | WD                |
| DQB1*06:29                                                  | 06:29              | HLA02696  |                                               | 0        | 0        | 6         | 0        | 0        | 0        | 0        | 6         |                                                      |           | WD        |      |     |     |     | WD        | WD                |
| DQB1*06:30                                                  | 06:30              | HLA02740  |                                               | 0        | 0        | 3         | 1        | 0        | 0        | 0        | 4         |                                                      |           |           |      |     |     |     |           |                   |
| DQB1*06:31                                                  | 06:31              | HLA02917  |                                               | 0        | 1        | 7         | 13       | 0        | 0        | 0        | 21        |                                                      |           | WD        | WD   |     |     |     | WD        | WD                |
| <b>DQB1*06:32 total</b>                                     | <b>06:32 total</b> |           |                                               | <b>1</b> | <b>0</b> | <b>36</b> | <b>0</b> | <b>0</b> | <b>0</b> | <b>2</b> | <b>39</b> |                                                      |           | <b>WD</b> |      |     |     |     | <b>WD</b> | <b>WD</b>         |
| DQB1*06:32                                                  | 06:32              |           |                                               | 1        | 0        | 25        | 0        | 0        | 0        | 2        | 28        |                                                      |           | WD        |      |     |     |     | WD        | WD                |
| DQB1*06:32:01                                               | 06:32:01           | HLA02950  |                                               | 0        | 0        | 11        | 0        | 0        | 0        | 0        | 11        |                                                      |           | WD        |      |     |     |     | WD        | WD                |
| DQB1*06:33                                                  | 06:33              | HLA02970  |                                               | 7        | 1        | 126       | 0        | 2        | 1        | 29       | 166       | WD                                                   |           | I         |      |     |     | I   | I         | I                 |
| DQB1*06:37                                                  | 06:37              | HLA04119  |                                               | 0        | 0        | 0         | 1        | 0        | 0        | 0        | 1         |                                                      |           |           |      |     |     |     |           |                   |
| DQB1*06:40                                                  | 06:40              | HLA04737  |                                               | 0        | 0        | 5         | 0        | 0        | 0        | 0        | 5         |                                                      |           | WD        |      |     |     |     | WD        | WD                |
| DQB1*06:46                                                  | 06:46              | HLA06877  |                                               | 12       | 0        | 16        | 0        | 0        | 1        | 1        | 30        | WD                                                   |           | WD        |      |     |     |     | WD        | WD                |
| DQB1*06:48                                                  | 06:48              | HLA07539  |                                               | 1        | 543      | 18        | 2        | 1        | 0        | 10       | 575       |                                                      | C         | WD        |      |     |     | WD  | I         | C                 |
| DQB1*06:49                                                  | 06:49              | HLA07820  |                                               | 76       | 0        | 1         | 0        | 1        | 0        | 8        | 86        | C                                                    |           |           |      |     |     | WD  | WD        | C                 |
| DQB1*06:50                                                  | 06:50              | HLA07922  |                                               | 32       | 0        | 0         | 0        | 0        | 0        | 4        | 36        | WD                                                   |           |           |      |     |     |     | WD        | WD                |
| <b>DQB1*06:53 total</b>                                     | <b>06:53 total</b> |           |                                               | <b>0</b> | <b>8</b> | <b>23</b> | <b>0</b> | <b>0</b> | <b>0</b> | <b>0</b> | <b>31</b> |                                                      | <b>WD</b> | <b>WD</b> |      |     |     |     | <b>WD</b> | <b>WD</b>         |
| DQB1*06:53                                                  | 06:53              |           |                                               | 0        | 1        | 19        | 0        | 0        | 0        | 0        | 20        |                                                      |           | WD        |      |     |     |     | WD        | WD                |
| DQB1*06:53:01                                               | 06:53:01           | HLA09222  |                                               | 0        | 0        | 4         | 0        | 0        | 0        | 0        | 4         |                                                      |           |           |      |     |     |     |           |                   |
| DQB1*06:53:02                                               | 06:53:02           | HLA15318  |                                               | 0        | 7        | 0         | 0        | 0        | 0        | 0        | 7         |                                                      | WD        |           |      |     |     |     | WD        | WD                |
| DQB1*06:55                                                  | 06:55              | HLA09225  |                                               | 0        | 37       | 5         | 0        | 0        | 0        | 0        | 42        |                                                      | I         | WD        |      |     |     |     | WD        | I                 |
| DQB1*06:56                                                  | 06:56              | HLA09226  |                                               | 0        | 1        | 0         | 0        | 0        | 0        | 0        | 1         |                                                      |           |           |      |     |     |     |           |                   |
| DQB1*06:57                                                  | 06:57              | HLA09227  |                                               | 0        | 85       | 0         | 0        | 0        | 0        | 0        | 85        |                                                      | I         |           |      |     |     |     | WD        | I                 |
| DQB1*06:58                                                  | 06:58              | HLA09229  |                                               | 0        | 0        | 15        | 0        | 0        | 0        | 0        | 15        |                                                      |           | WD        |      |     |     |     | WD        | WD                |
| DQB1*06:59                                                  | 06:59              | HLA09264  |                                               | 0        | 0        | 1         | 0        | 0        | 0        | 0        | 1         |                                                      |           |           |      |     |     |     |           |                   |
| DQB1*06:60                                                  | 06:60              | HLA09265  |                                               | 0        | 0        | 0         | 0        | 1        | 0        | 0        | 1         |                                                      |           |           |      |     |     |     |           |                   |
| DQB1*06:62                                                  | 06:62              | HLA09267  |                                               | 0        | 0        | 5         | 0        | 0        | 0        | 0        | 5         |                                                      |           | WD        |      |     |     |     | WD        | WD                |
| DQB1*06:63                                                  | 06:63              | HLA09268  |                                               | 0        | 0        | 3         | 0        | 0        | 0        | 0        | 3         |                                                      |           |           |      |     |     |     |           |                   |
| DQB1*06:64                                                  | 06:64              | HLA09271  |                                               | 0        | 0        | 3         | 0        | 0        | 0        | 0        | 3         |                                                      |           |           |      |     |     |     |           |                   |
| DQB1*06:68                                                  | 06:68              | HLA09358  |                                               | 0        | 0        | 9         | 0        | 1        | 0        | 2        | 12        |                                                      |           | WD        |      |     |     |     | WD        | WD                |
| <b>DQB1*06:69 total</b>                                     | <b>06:69 total</b> |           |                                               | <b>1</b> | <b>0</b> | <b>6</b>  | <b>0</b> | <b>2</b> | <b>0</b> | <b>1</b> | <b>10</b> |                                                      |           | <b>WD</b> |      |     |     |     | <b>WD</b> | <b>WD</b>         |

| Supplemental Table 15: HLA-DQB1 Allele Summary <sup>a</sup> |                     |           | Allele Count by Population Group <sup>b</sup> |          |          |           |          |          |          |          |           |     | 3.0.0 CIWD Category by Population Group <sup>c</sup> |           |      |     |     |     |           |                   |
|-------------------------------------------------------------|---------------------|-----------|-----------------------------------------------|----------|----------|-----------|----------|----------|----------|----------|-----------|-----|------------------------------------------------------|-----------|------|-----|-----|-----|-----------|-------------------|
| Allele                                                      | Genomic Typing      | Allele ID | G group                                       | AFA      | API      | EURO      | MENA     | HIS      | NAM      | UNK      | Total     | AFA | API                                                  | EURO      | MENA | HIS | NAM | UNK | Total     | Highest Frequency |
| DQB1*06:69                                                  | 06:69               |           |                                               | 1        | 0        | 6         | 0        | 2        | 0        | 1        | 10        |     |                                                      | WD        |      |     |     |     | WD        | WD                |
| DQB1*06:70                                                  | 06:70               | HLA09365  |                                               | 0        | 0        | 2         | 0        | 0        | 0        | 1        | 3         |     |                                                      |           |      |     |     |     |           |                   |
| DQB1*06:71                                                  | 06:71               | HLA09367  |                                               | 0        | 0        | 3         | 0        | 0        | 0        | 0        | 3         |     |                                                      |           |      |     |     |     |           |                   |
| DQB1*06:73                                                  | 06:73               | HLA09371  |                                               | 1        | 0        | 20        | 0        | 0        | 0        | 0        | 21        |     |                                                      | WD        |      |     |     |     | WD        | WD                |
| DQB1*06:74                                                  | 06:74               | HLA09372  |                                               | 0        | 40       | 3         | 0        | 0        | 0        | 15       | 58        |     | I                                                    |           |      |     |     | I   | WD        | I                 |
| DQB1*06:75N                                                 | 06:75N              | HLA09373  |                                               | 0        | 0        | 23        | 0        | 0        | 0        | 0        | 23        |     |                                                      | WD        |      |     |     |     | WD        | WD                |
| DQB1*06:76                                                  | 06:76               | HLA09374  |                                               | 0        | 0        | 1         | 0        | 0        | 0        | 0        | 1         |     |                                                      |           |      |     |     |     |           |                   |
| DQB1*06:77N                                                 | 06:77N              | HLA09375  |                                               | 0        | 18       | 0         | 0        | 0        | 0        | 0        | 18        |     | I                                                    |           |      |     |     |     | WD        | I                 |
| DQB1*06:78                                                  | 06:78               | HLA09376  |                                               | 0        | 0        | 5         | 0        | 0        | 0        | 2        | 7         |     |                                                      | WD        |      |     |     |     | WD        | WD                |
| <b>DQB1*06:79 total</b>                                     | <b>06:79 total</b>  |           |                                               | <b>3</b> | <b>0</b> | <b>29</b> | <b>0</b> | <b>0</b> | <b>0</b> | <b>2</b> | <b>34</b> |     |                                                      | <b>WD</b> |      |     |     |     | <b>WD</b> | <b>WD</b>         |
| DQB1*06:79                                                  | 06:79               |           |                                               | 2        | 0        | 6         | 0        | 0        | 0        | 0        | 8         |     |                                                      | WD        |      |     |     |     | WD        | WD                |
| DQB1*06:79:01                                               | 06:79:01            | HLA09379  |                                               | 1        | 0        | 22        | 0        | 0        | 0        | 2        | 25        |     |                                                      | WD        |      |     |     |     | WD        | WD                |
| DQB1*06:79:02                                               | 06:79:02            | HLA11498  |                                               | 0        | 0        | 1         | 0        | 0        | 0        | 0        | 1         |     |                                                      |           |      |     |     |     |           |                   |
| DQB1*06:80                                                  | 06:80               | HLA09380  |                                               | 0        | 0        | 1         | 0        | 0        | 0        | 0        | 1         |     |                                                      |           |      |     |     |     |           |                   |
| DQB1*06:81                                                  | 06:81               | HLA09382  |                                               | 0        | 1        | 53        | 0        | 0        | 0        | 27       | 81        |     |                                                      | WD        |      |     |     | I   | WD        | I                 |
| DQB1*06:82                                                  | 06:82               | HLA09383  |                                               | 1        | 0        | 8         | 0        | 0        | 0        | 0        | 9         |     |                                                      | WD        |      |     |     |     | WD        | WD                |
| DQB1*06:83                                                  | 06:83               | HLA09384  |                                               | 0        | 0        | 1         | 0        | 0        | 0        | 1        | 2         |     |                                                      |           |      |     |     |     |           |                   |
| DQB1*06:85                                                  | 06:85               | HLA09633  |                                               | 8        | 0        | 1         | 3        | 0        | 0        | 0        | 12        | WD  |                                                      |           |      |     |     |     | WD        | WD                |
| DQB1*06:90                                                  | 06:90               | HLA09733  |                                               | 0        | 0        | 28        | 0        | 0        | 0        | 0        | 28        |     |                                                      | WD        |      |     |     |     | WD        | WD                |
| DQB1*06:91                                                  | 06:91               | HLA09734  |                                               | 0        | 5        | 0         | 0        | 0        | 0        | 0        | 5         |     | WD                                                   |           |      |     |     |     | WD        | WD                |
| DQB1*06:92                                                  | 06:92               | HLA09735  |                                               | 0        | 20       | 2         | 2        | 0        | 0        | 1        | 25        |     | I                                                    |           |      |     |     |     | WD        | I                 |
| DQB1*06:93                                                  | 06:93               | HLA09737  |                                               | 0        | 0        | 4         | 0        | 0        | 0        | 3        | 7         |     |                                                      |           |      |     |     |     | WD        | WD                |
| DQB1*06:94                                                  | 06:94               | HLA09740  |                                               | 0        | 0        | 1         | 0        | 0        | 0        | 0        | 1         |     |                                                      |           |      |     |     |     |           |                   |
| DQB1*06:95                                                  | 06:95               | HLA09747  |                                               | 1        | 0        | 0         | 0        | 0        | 0        | 0        | 1         |     |                                                      |           |      |     |     |     |           |                   |
| DQB1*06:97                                                  | 06:97               | HLA09751  |                                               | 0        | 0        | 2         | 0        | 0        | 0        | 0        | 2         |     |                                                      |           |      |     |     |     |           |                   |
| <b>DQB1*06:99 total</b>                                     | <b>06:99 total</b>  |           |                                               | <b>0</b> | <b>3</b> | <b>0</b>  | <b>0</b> | <b>0</b> | <b>0</b> | <b>0</b> | <b>3</b>  |     |                                                      |           |      |     |     |     |           |                   |
| DQB1*06:99:02                                               | 06:99:02            | HLA11561  |                                               | 0        | 3        | 0         | 0        | 0        | 0        | 0        | 3         |     |                                                      |           |      |     |     |     |           |                   |
| DQB1*06:100                                                 | 06:100              | HLA09862  |                                               | 0        | 1        | 0         | 0        | 0        | 0        | 0        | 1         |     |                                                      |           |      |     |     |     |           |                   |
| DQB1*06:106                                                 | 06:106              | HLA09926  |                                               | 0        | 0        | 2         | 0        | 0        | 0        | 0        | 2         |     |                                                      |           |      |     |     |     |           |                   |
| DQB1*06:114                                                 | 06:114              | HLA10244  |                                               | 0        | 1        | 0         | 0        | 0        | 0        | 0        | 1         |     |                                                      |           |      |     |     |     |           |                   |
| <b>DQB1*06:118 total</b>                                    | <b>06:118 total</b> |           |                                               | <b>1</b> | <b>1</b> | <b>5</b>  | <b>0</b> | <b>0</b> | <b>0</b> | <b>0</b> | <b>7</b>  |     |                                                      | <b>WD</b> |      |     |     |     | <b>WD</b> | <b>WD</b>         |

| Supplemental Table 15: HLA-DQB1 Allele Summary <sup>a</sup> |                     |           | Allele Count by Population Group <sup>b</sup> |          |          |          |          |          |          |          |          |     | 3.0.0 CIWD Category by Population Group <sup>c</sup> |      |      |     |     |     |       |                   |
|-------------------------------------------------------------|---------------------|-----------|-----------------------------------------------|----------|----------|----------|----------|----------|----------|----------|----------|-----|------------------------------------------------------|------|------|-----|-----|-----|-------|-------------------|
| Allele                                                      | Genomic Typing      | Allele ID | G group                                       | AFA      | API      | EURO     | MENA     | HIS      | NAM      | UNK      | Total    | AFA | API                                                  | EURO | MENA | HIS | NAM | UNK | Total | Highest Frequency |
| DQB1*06:118:02                                              | 06:118:02           | HLA12031  |                                               | 1        | 1        | 5        | 0        | 0        | 0        | 0        | 7        |     |                                                      | WD   |      |     |     |     | WD    | WD                |
| DQB1*06:119                                                 | 06:119              | HLA10257  |                                               | 0        | 0        | 2        | 0        | 0        | 0        | 1        | 3        |     |                                                      |      |      |     |     |     |       |                   |
| DQB1*06:122                                                 | 06:122              | HLA10293  |                                               | 0        | 1        | 5        | 0        | 0        | 0        | 0        | 6        |     |                                                      | WD   |      |     |     |     | WD    | WD                |
| DQB1*06:123                                                 | 06:123              | HLA10295  |                                               | 0        | 0        | 0        | 4        | 0        | 0        | 0        | 4        |     |                                                      |      |      |     |     |     |       |                   |
| DQB1*06:124                                                 | 06:124              | HLA10297  |                                               | 0        | 0        | 1        | 0        | 0        | 0        | 0        | 1        |     |                                                      |      |      |     |     |     |       |                   |
| DQB1*06:125                                                 | 06:125              | HLA10298  |                                               | 0        | 0        | 30       | 0        | 0        | 0        | 0        | 30       |     |                                                      | WD   |      |     |     |     | WD    | WD                |
| DQB1*06:126                                                 | 06:126              | HLA10300  |                                               | 0        | 0        | 0        | 7        | 0        | 0        | 0        | 7        |     |                                                      |      | WD   |     |     |     | WD    | WD                |
| DQB1*06:128                                                 | 06:128              | HLA10542  |                                               | 0        | 0        | 0        | 0        | 1        | 0        | 0        | 1        |     |                                                      |      |      |     |     |     |       |                   |
| DQB1*06:131                                                 | 06:131              | HLA11123  |                                               | 0        | 0        | 0        | 0        | 1        | 0        | 0        | 1        |     |                                                      |      |      |     |     |     |       |                   |
| DQB1*06:134                                                 | 06:134              | HLA11135  |                                               | 2        | 0        | 0        | 0        | 1        | 0        | 0        | 3        |     |                                                      |      |      |     |     |     |       |                   |
| DQB1*06:135                                                 | 06:135              | HLA11139  |                                               | 0        | 7        | 0        | 0        | 0        | 0        | 0        | 7        |     | WD                                                   |      |      |     |     |     | WD    | WD                |
| DQB1*06:136                                                 | 06:136              | HLA11152  |                                               | 0        | 0        | 5        | 0        | 0        | 0        | 0        | 5        |     |                                                      | WD   |      |     |     |     | WD    | WD                |
| DQB1*06:137                                                 | 06:137              | HLA11153  |                                               | 0        | 0        | 1        | 0        | 0        | 0        | 0        | 1        |     |                                                      |      |      |     |     |     |       |                   |
| DQB1*06:139                                                 | 06:139              | HLA11156  |                                               | 0        | 0        | 1        | 0        | 0        | 0        | 0        | 1        |     |                                                      |      |      |     |     |     |       |                   |
| DQB1*06:140                                                 | 06:140              | HLA11273  |                                               | 0        | 27       | 0        | 0        | 0        | 0        | 0        | 27       |     | I                                                    |      |      |     |     |     | WD    | I                 |
| DQB1*06:141                                                 | 06:141              | HLA11280  |                                               | 0        | 0        | 1        | 0        | 0        | 0        | 0        | 1        |     |                                                      |      |      |     |     |     |       |                   |
| DQB1*06:142                                                 | 06:142              | HLA11281  |                                               | 0        | 6        | 0        | 0        | 0        | 0        | 0        | 6        |     | WD                                                   |      |      |     |     |     | WD    | WD                |
| DQB1*06:143                                                 | 06:143              | HLA11286  |                                               | 0        | 0        | 1        | 0        | 0        | 0        | 0        | 1        |     |                                                      |      |      |     |     |     |       |                   |
| DQB1*06:144N                                                | 06:144N             | HLA11353  |                                               | 0        | 8        | 0        | 0        | 0        | 0        | 2        | 10       |     | WD                                                   |      |      |     |     |     | WD    | WD                |
| DQB1*06:145                                                 | 06:145              | HLA11354  |                                               | 0        | 1        | 2        | 0        | 0        | 0        | 0        | 3        |     |                                                      |      |      |     |     |     |       |                   |
| <b>DQB1*06:146 total</b>                                    | <b>06:146 total</b> |           |                                               | <b>0</b> | <b>0</b> | <b>3</b> | <b>1</b> | <b>0</b> | <b>0</b> | <b>0</b> | <b>4</b> |     |                                                      |      |      |     |     |     |       |                   |
| DQB1*06:146                                                 | 06:146              |           |                                               | 0        | 0        | 1        | 0        | 0        | 0        | 0        | 1        |     |                                                      |      |      |     |     |     |       |                   |
| DQB1*06:146:01                                              | 06:146:01           | HLA11367  |                                               | 0        | 0        | 1        | 1        | 0        | 0        | 0        | 2        |     |                                                      |      |      |     |     |     |       |                   |
| DQB1*06:146:02                                              | 06:146:02           | HLA14173  |                                               | 0        | 0        | 1        | 0        | 0        | 0        | 0        | 1        |     |                                                      |      |      |     |     |     |       |                   |
| DQB1*06:147                                                 | 06:147              | HLA11368  |                                               | 0        | 0        | 2        | 0        | 0        | 0        | 1        | 3        |     |                                                      |      |      |     |     |     |       |                   |
| DQB1*06:148                                                 | 06:148              | HLA11489  |                                               | 0        | 4        | 0        | 0        | 0        | 0        | 0        | 4        |     |                                                      |      |      |     |     |     |       |                   |
| DQB1*06:151                                                 | 06:151              | HLA11685  |                                               | 0        | 0        | 1        | 0        | 0        | 0        | 0        | 1        |     |                                                      |      |      |     |     |     |       |                   |
| DQB1*06:152                                                 | 06:152              | HLA11686  |                                               | 0        | 0        | 1        | 0        | 0        | 0        | 0        | 1        |     |                                                      |      |      |     |     |     |       |                   |
| DQB1*06:153                                                 | 06:153              | HLA11879  |                                               | 0        | 5        | 0        | 5        | 0        | 0        | 0        | 10       |     | WD                                                   |      | WD   |     |     |     | WD    | WD                |
| DQB1*06:155                                                 | 06:155              | HLA11885  |                                               | 0        | 0        | 15       | 0        | 0        | 0        | 0        | 15       |     |                                                      | WD   |      |     |     |     | WD    | WD                |
| DQB1*06:157                                                 | 06:157              | HLA12025  |                                               | 0        | 1        | 0        | 0        | 0        | 0        | 0        | 1        |     |                                                      |      |      |     |     |     |       |                   |

| Supplemental Table 15: HLA-DQB1 Allele Summary <sup>a</sup> |                     |           | Allele Count by Population Group <sup>b</sup> |               |                |                 |               |               |              |                |                 |     | 3.0.0 CIWD Category by Population Group <sup>c</sup> |      |      |     |     |     |       |                   |    |
|-------------------------------------------------------------|---------------------|-----------|-----------------------------------------------|---------------|----------------|-----------------|---------------|---------------|--------------|----------------|-----------------|-----|------------------------------------------------------|------|------|-----|-----|-----|-------|-------------------|----|
| Allele                                                      | Genomic Typing      | Allele ID | G group                                       | AFA           | API            | EURO            | MENA          | HIS           | NAM          | UNK            | Total           | AFA | API                                                  | EURO | MENA | HIS | NAM | UNK | Total | Highest Frequency |    |
| DQB1*06:158N                                                | 06:158N             | HLA12030  |                                               | 0             | 0              | 1               | 0             | 0             | 0            | 1              | 2               |     |                                                      |      |      |     |     |     |       |                   |    |
| DQB1*06:159                                                 | 06:159              | HLA12047  |                                               | 0             | 0              | 1               | 0             | 0             | 0            | 0              | 1               |     |                                                      |      |      |     |     |     |       |                   |    |
| DQB1*06:160                                                 | 06:160              | HLA12210  |                                               | 0             | 0              | 1               | 0             | 0             | 0            | 0              | 1               |     |                                                      |      |      |     |     |     |       |                   |    |
| DQB1*06:162                                                 | 06:162              | HLA12361  |                                               | 0             | 0              | 2               | 0             | 0             | 0            | 0              | 2               |     |                                                      |      |      |     |     |     |       |                   |    |
| DQB1*06:164                                                 | 06:164              | HLA12526  |                                               | 0             | 0              | 1               | 0             | 0             | 0            | 2              | 3               |     |                                                      |      |      |     |     |     |       |                   |    |
| DQB1*06:166                                                 | 06:166              | HLA12534  |                                               | 0             | 0              | 1               | 0             | 0             | 0            | 0              | 1               |     |                                                      |      |      |     |     |     |       |                   |    |
| DQB1*06:169                                                 | 06:169              | HLA13130  |                                               | 0             | 0              | 1               | 2             | 0             | 0            | 1              | 4               |     |                                                      |      |      |     |     |     |       |                   |    |
| DQB1*06:170                                                 | 06:170              | HLA13131  |                                               | 0             | 0              | 0               | 0             | 0             | 0            | 2              | 2               |     |                                                      |      |      |     |     |     |       |                   |    |
| DQB1*06:171                                                 | 06:171              | HLA13133  |                                               | 2             | 0              | 0               | 0             | 0             | 0            | 0              | 2               |     |                                                      |      |      |     |     |     |       |                   |    |
| DQB1*06:172                                                 | 06:172              | HLA13134  |                                               | 0             | 0              | 2               | 0             | 0             | 0            | 0              | 2               |     |                                                      |      |      |     |     |     |       |                   |    |
| DQB1*06:173                                                 | 06:173              | HLA13150  |                                               | 0             | 0              | 1               | 0             | 0             | 0            | 0              | 1               |     |                                                      |      |      |     |     |     |       |                   |    |
| DQB1*06:176                                                 | 06:176              | HLA13575  |                                               | 0             | 0              | 1               | 0             | 0             | 0            | 0              | 1               |     |                                                      |      |      |     |     |     |       |                   |    |
| DQB1*06:177                                                 | 06:177              | HLA13576  |                                               | 0             | 1              | 0               | 0             | 0             | 0            | 0              | 1               |     |                                                      |      |      |     |     |     |       |                   |    |
| DQB1*06:178                                                 | 06:178              | HLA13583  |                                               | 0             | 0              | 1               | 0             | 0             | 0            | 0              | 1               |     |                                                      |      |      |     |     |     |       |                   |    |
| DQB1*06:179N                                                | 06:179N             | HLA13584  |                                               | 1             | 0              | 0               | 0             | 0             | 0            | 0              | 1               |     |                                                      |      |      |     |     |     |       |                   |    |
| DQB1*06:181                                                 | 06:181              | HLA13677  |                                               | 0             | 2              | 0               | 0             | 0             | 0            | 0              | 2               |     |                                                      |      |      |     |     |     |       |                   |    |
| DQB1*06:183                                                 | 06:183              | HLA13813  |                                               | 0             | 2              | 0               | 0             | 0             | 0            | 0              | 2               |     |                                                      |      |      |     |     |     |       |                   |    |
| DQB1*06:184                                                 | 06:184              | HLA13882  |                                               | 0             | 6              | 0               | 1             | 0             | 0            | 0              | 7               |     | WD                                                   |      |      |     |     |     | WD    | WD                |    |
| <b>DQB1*06:190 total</b>                                    | <b>06:190 total</b> |           |                                               | <b>0</b>      | <b>0</b>       | <b>3</b>        | <b>0</b>      | <b>0</b>      | <b>0</b>     | <b>0</b>       | <b>3</b>        |     |                                                      |      |      |     |     |     |       |                   |    |
| DQB1*06:190                                                 | 06:190              |           |                                               | 0             | 0              | 3               | 0             | 0             | 0            | 0              | 3               |     |                                                      |      |      |     |     |     |       |                   |    |
| DQB1*06:191                                                 | 06:191              | HLA14038  |                                               | 0             | 0              | 3               | 0             | 0             | 0            | 0              | 3               |     |                                                      |      |      |     |     |     |       |                   |    |
| DQB1*06:194                                                 | 06:194              | HLA14159  |                                               | 0             | 0              | 0               | 1             | 0             | 0            | 0              | 1               |     |                                                      |      |      |     |     |     |       |                   |    |
| DQB1*06:198                                                 | 06:198              | HLA14351  |                                               | 0             | 0              | 1               | 0             | 0             | 0            | 0              | 1               |     |                                                      |      |      |     |     |     |       |                   |    |
| DQB1*06:199                                                 | 06:199              | HLA14548  |                                               | 0             | 0              | 1               | 0             | 0             | 0            | 0              | 1               |     |                                                      |      |      |     |     |     |       |                   |    |
| DQB1*06:202                                                 | 06:202              | HLA14686  |                                               | 0             | 0              | 1               | 0             | 0             | 0            | 0              | 1               |     |                                                      |      |      |     |     |     |       |                   |    |
| <b>DQB1*06:206 total</b>                                    | <b>06:206 total</b> |           |                                               | <b>0</b>      | <b>0</b>       | <b>1</b>        | <b>0</b>      | <b>0</b>      | <b>0</b>     | <b>0</b>       | <b>1</b>        |     |                                                      |      |      |     |     |     |       |                   |    |
| DQB1*06:206:02                                              | 06:206:02           | HLA16189  |                                               | 0             | 0              | 1               | 0             | 0             | 0            | 0              | 1               |     |                                                      |      |      |     |     |     |       |                   |    |
| DQB1*06:CODE                                                | 06:CODE             |           |                                               | 5731          | 2748           | 82247           | 808           | 5173          | 463          | 9438           | 106608          | NA  | NA                                                   | NA   | NA   | NA  | NA  | NA  | NA    | NA                | NA |
| DQB1*NEW <sup>e</sup>                                       | NEW                 |           |                                               | 0             | 0              | 2               | 0             | 0             | 0            | 0              | 2               |     |                                                      |      |      |     |     |     |       |                   |    |
| <b>DQB1*Total</b>                                           | <b>Total</b>        |           |                                               | <b>378275</b> | <b>1314598</b> | <b>11735570</b> | <b>402840</b> | <b>678680</b> | <b>66309</b> | <b>1227926</b> | <b>15804198</b> |     |                                                      |      |      |     |     |     |       |                   |    |

| Supplemental Table 15: HLA-DQB1 Allele Summary <sup>a</sup> |                |           |         | Allele Count by Population Group <sup>b</sup> |     |      |      |     |     |     |       | 3.0.0 CIWD Category by Population Group <sup>c</sup> |     |      |      |     |     |     |       |                   |
|-------------------------------------------------------------|----------------|-----------|---------|-----------------------------------------------|-----|------|------|-----|-----|-----|-------|------------------------------------------------------|-----|------|------|-----|-----|-----|-------|-------------------|
| Allele                                                      | Genomic Typing | Allele ID | G group | AFA                                           | API | EURO | MENA | HIS | NAM | UNK | Total | AFA                                                  | API | EURO | MENA | HIS | NAM | UNK | Total | Highest Frequency |

C, common; I, intermediate; WD, well-documented; NA, not applicable

<sup>a</sup> All alleles observed in the current dataset are included in this table. Note that alleles are not in numerical order; alleles within a G group are clustered together. P group "two-field" total (e.g., written as "DQB1\*02:01 total") and G group total summary rows are provided. The table does not list all alleles from IPD-IMGT version 3.31.0, if not present in the study dataset.

<sup>b</sup> Population groups include: AFA (African/African American), API (Asian/Pacific Islands), EURO (European/European descent), MENA (Middle East/North Coast of Africa), HIS (South or Central America/Hispanic/Latino), NAM (Native American populations) and UNK (unknown/not asked/multiple ancestries/other). Total is the overall population i.e., all groups combined.

<sup>c</sup> Allele frequency is calculated by dividing the number of times the "allele" of interest is observed in a population by the total number of copies of all the alleles at that particular genetic locus in the population (reported as the last row in this table and also in Table 2b). The total number of copies is calculated by multiplying the number of individuals times two for all loci except DRB3/4/5. For DRB3/4/5, the number of assignments was used as the total. The CIWD status is determined based on the allele frequency. Allele frequency data will be provided on the website of the next International HLA and Immunogenetics Workshop (<https://www.ihw18.org/>). Highest frequency is the highest CIWD designation among all the individual groups.

<sup>d</sup> "CODE" is generically defined as a summary category of submitted HLA typing, including NMDP multiple allele codes, with ambiguities that are not within a single P or G group. "NEW" is a summary category for assignments of novel alleles that did not yet receive a nomenclature assignment. The CODE and NEW categories add to the total number of alleles but should not be assigned CIWD designations (labeled as NA, not applicable) as they do not represent a consistent allele designation (i.e., the NEW category may contain alleles with different DNA sequences that are unrelated to one another).

<sup>e</sup> DQB1\*Total is the total number of allele assignments for the population group and is based on two times the number of individuals in the group. This number is also listed in Table 2b. It is not the sum of the column as alleles are not counted more than once. For example, when evaluating frequencies at the level of G resolution, individual alleles that make up the G group (e.g., A\*80:01:01, A\*80:01:01:01, A\*80:01:01:02, A\*80:01:01G) are not included in the count because these alleles are summed up in the total G designation (e.g., "A\*80:01:01G total").
